# Supplementary material
Source: PubMed Central journal article supplement (PMC4464103)

# Static Automated Perimetry. Single field analysis

Subject ID: 1004, age: 56, eye: OS (left)

Date: 02/20/2006 at 14:33

Duration: 05:34, pause: 00:00

false positives 0.0 %

false negatives 0.0 %

fixation losses 0.0 %

MS 27.2 dB

MD -3.4 dB (p < 0.5 %)

PSD 3.0 dB (p < 0.5 %)

VFI 93.3 % (p < 0.5 %)

GH 0.0 dB

total deviation

Central 24-2  
SITA standard

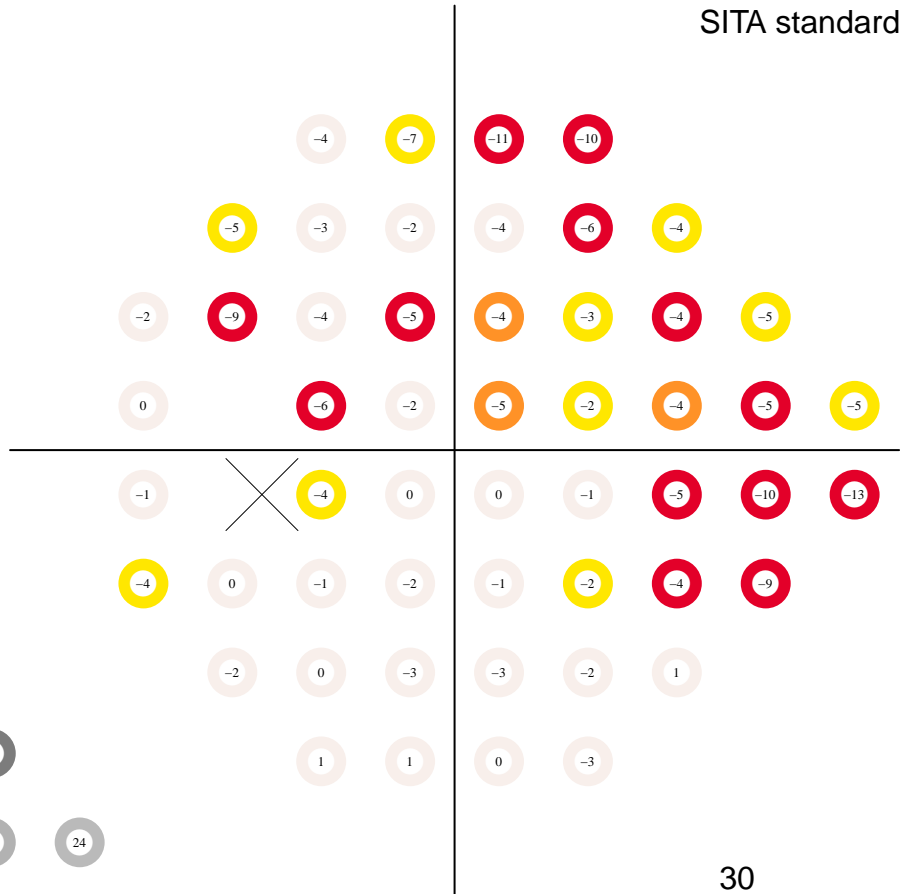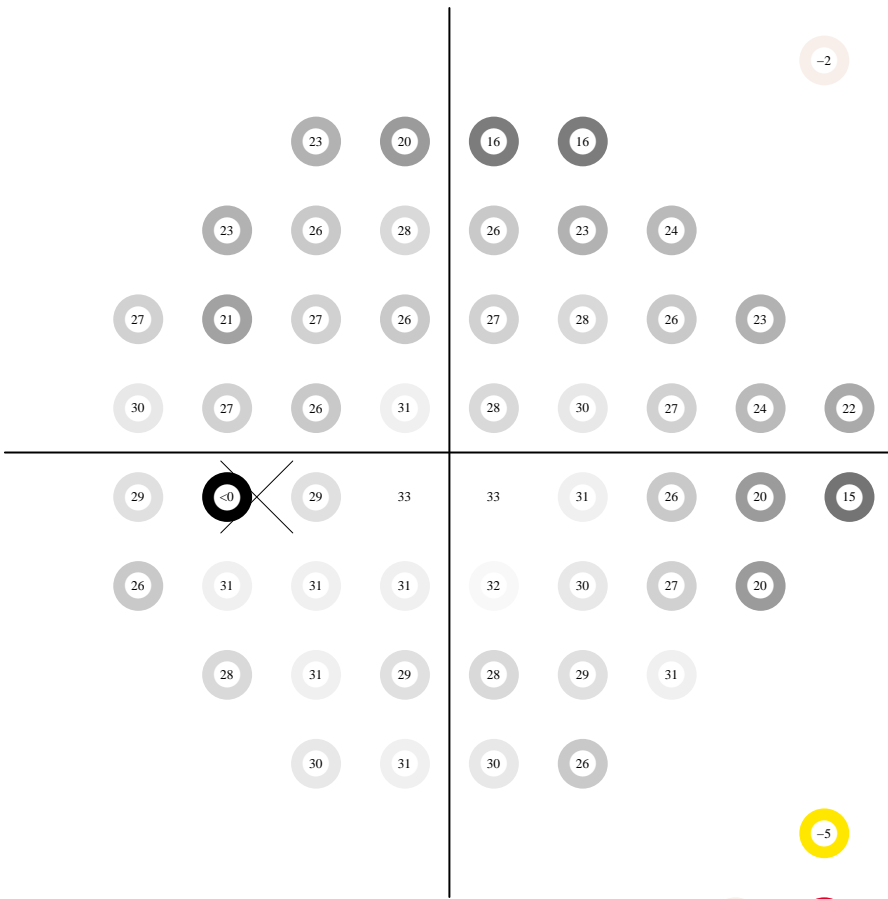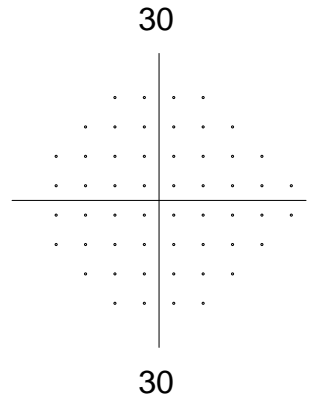

pattern deviation

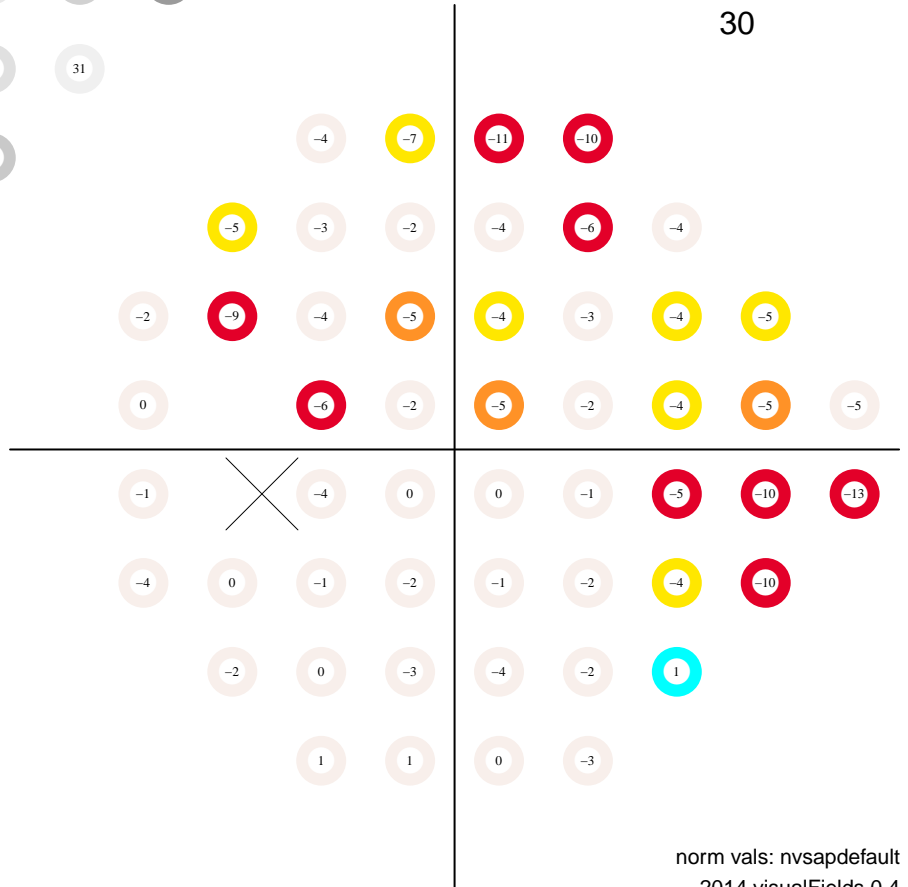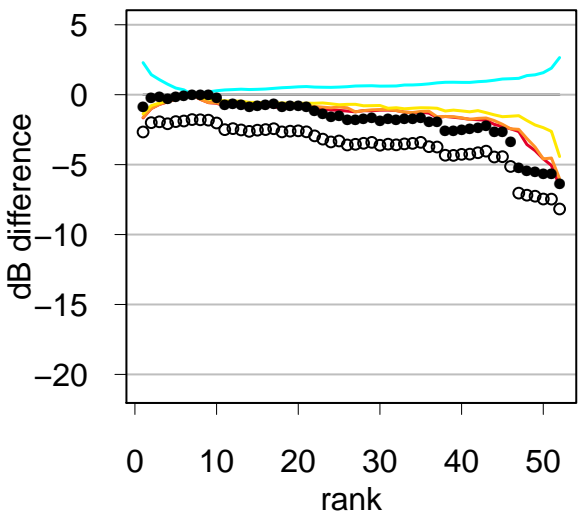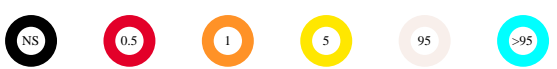



# Static Automated Perimetry. Single field analysis

Subject ID: 1004, age: 57, eye: OS (left)

Date: 10/24/2006 at 11:39

Duration: 04:50, pause: 00:00

false positives 0.0 %

false negatives 5.0 %

fixation losses 0.0 %

MS 28.4 dB

MD -2.1 dB (p < 95 %)

PSD 2.8 dB (p < 95 %)

VFI 96.5 % (p < 1 %)

GH 0.2 dB

total deviation

Central 24-2  
SITA standard

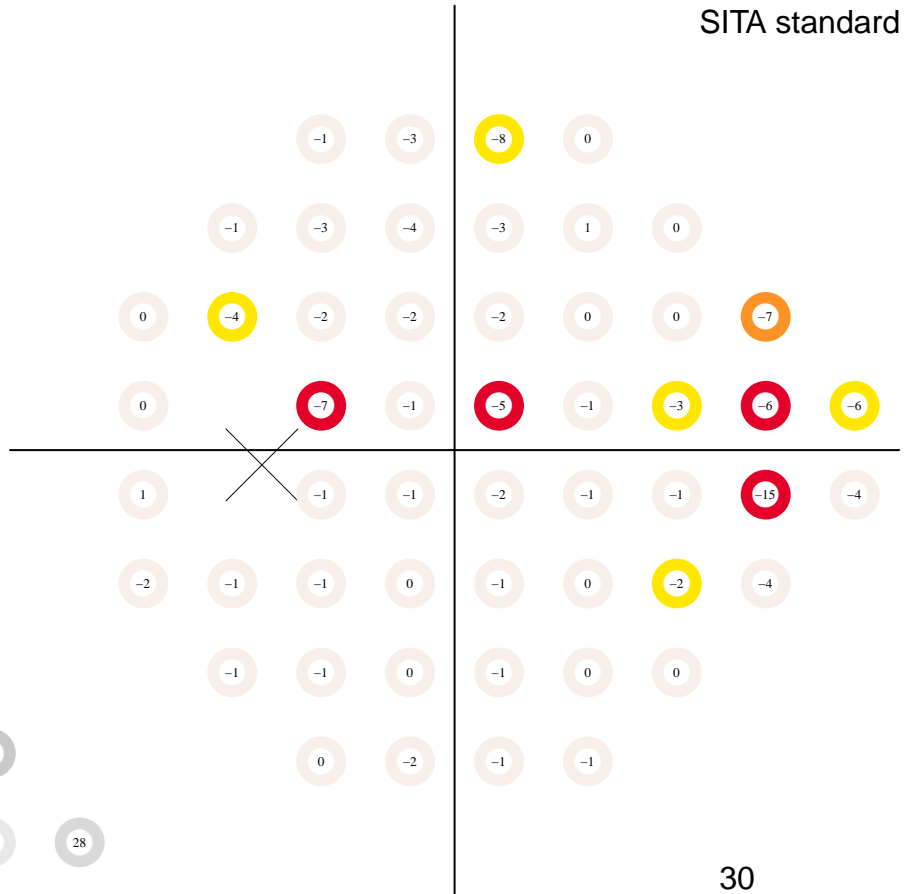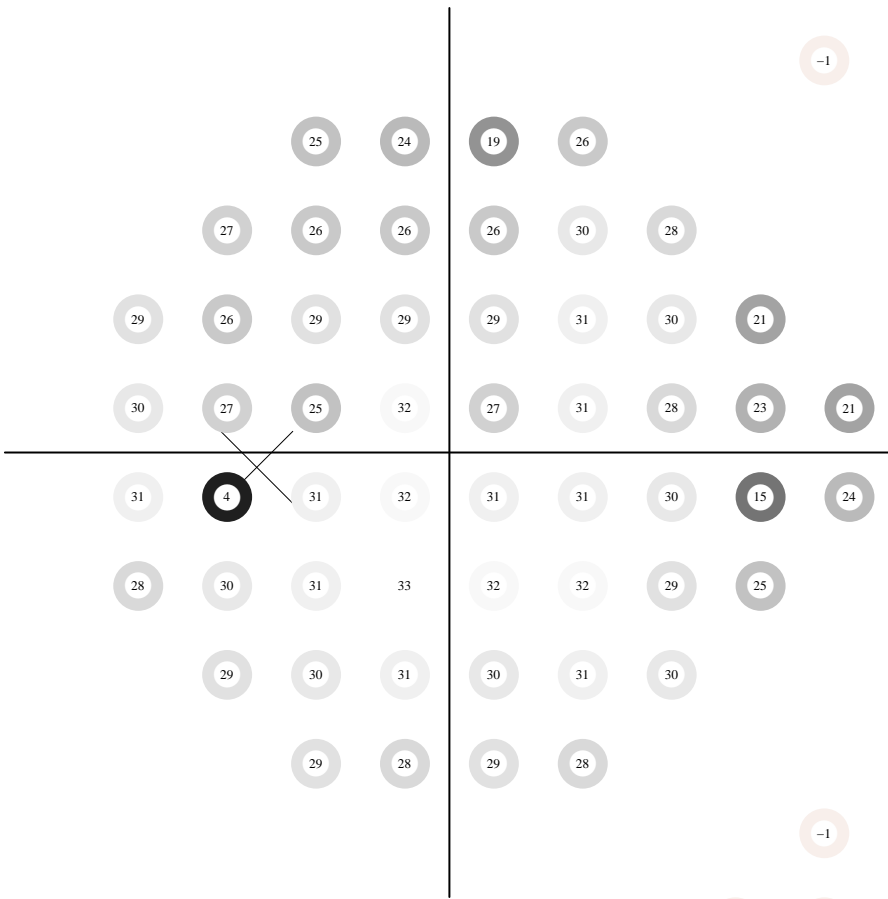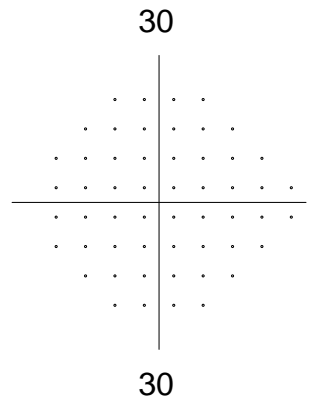

pattern deviation

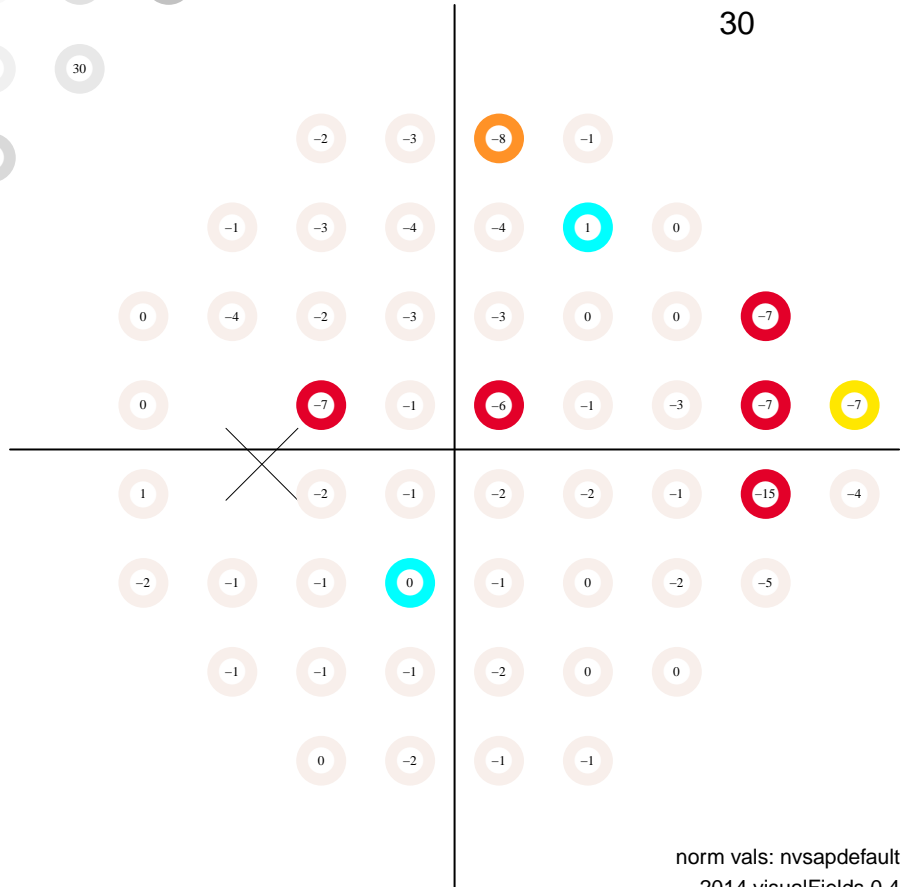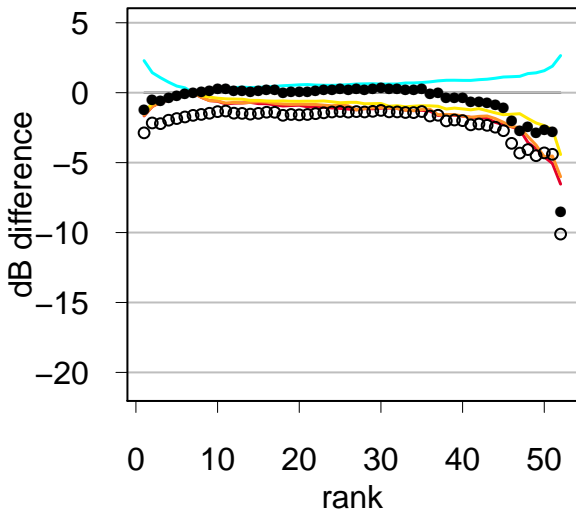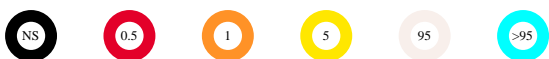

# Static Automated Perimetry. Single field analysis

Subject ID: 1004, age: 57, eye: OS (left)

Date: 03/19/2007 at 11:10

Duration: 05:07, pause: 00:00

false positives 0.0 %

false negatives 0.0 %

fixation losses 0.0 %

MS 27.8 dB

MD -2.7 dB (p < 5 %)

PSD 2.4 dB (p < 5 %)

VFI 95.8 % (p < 0.5 %)

GH -0.1 dB

total deviation

Central 24-2  
SITA standard

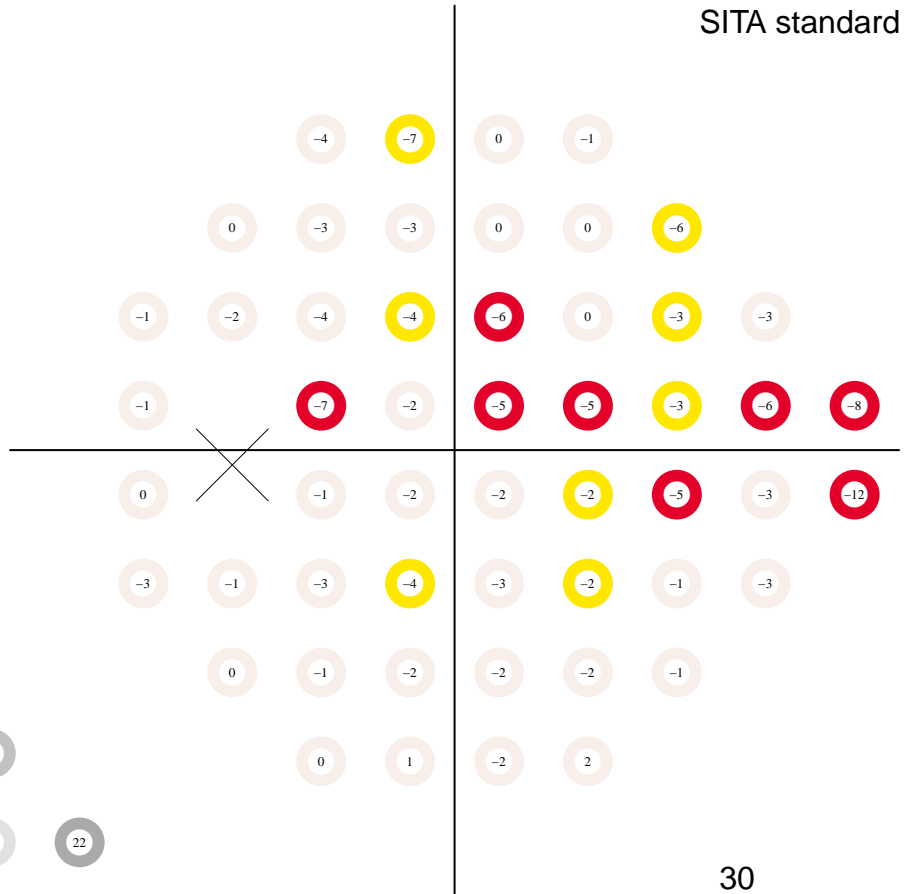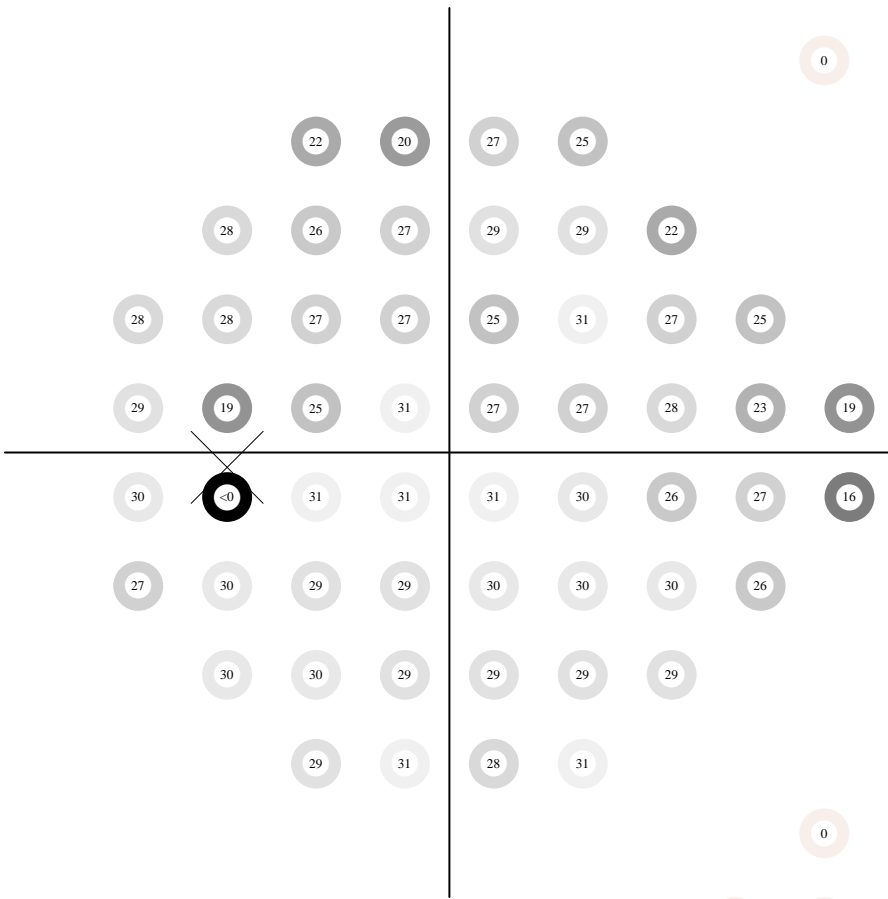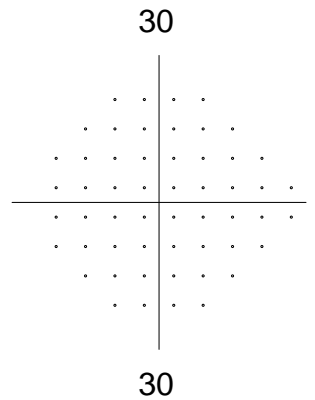

pattern deviation

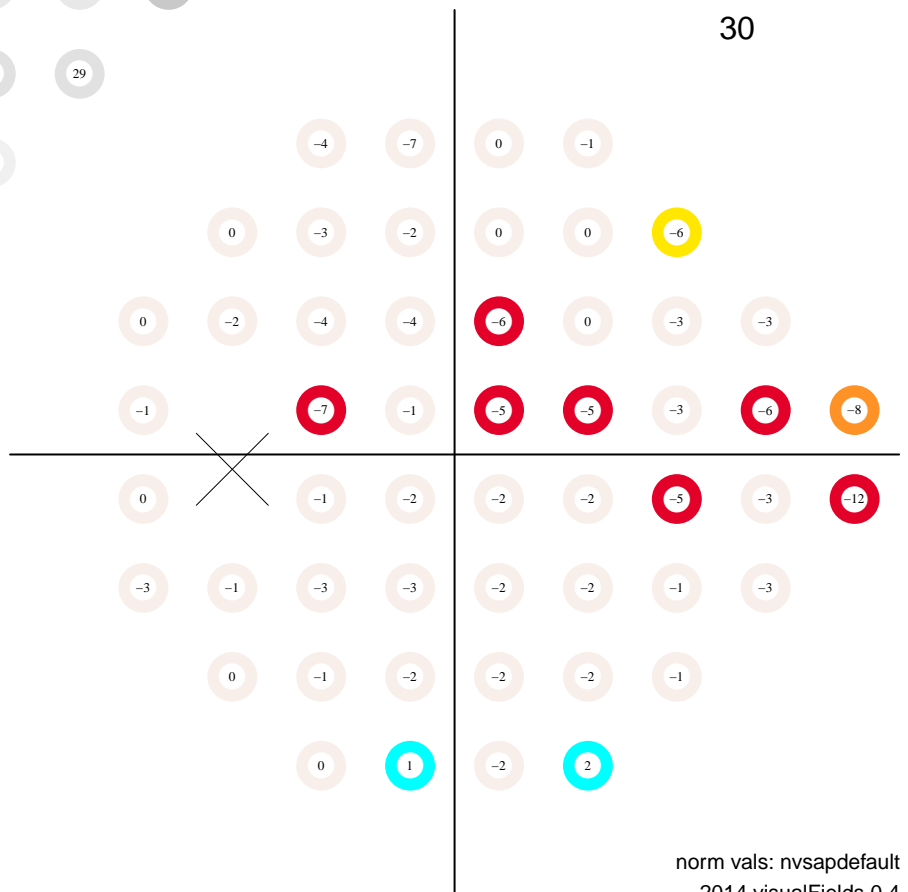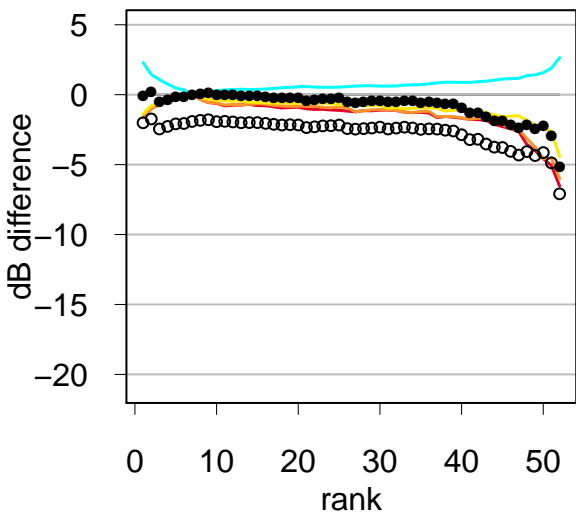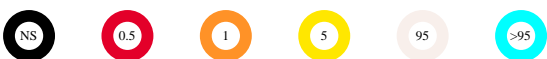

# Static Automated Perimetry. Single field analysis

Subject ID: 1004, age: 57, eye: OS (left)

Date: 05/08/2007 at 14:27

Duration: 04:51, pause: 00:00

false positives 0.0 %

false negatives 0.0 %

fixation losses 7.1 %

MS 28.3 dB

MD -2.3 dB (p < 95 %)

PSD 2.2 dB (p < 95 %)

VFI 96.9 % (p < 5 %)

GH 0.1 dB

total deviation

Central 24-2  
SITA standard

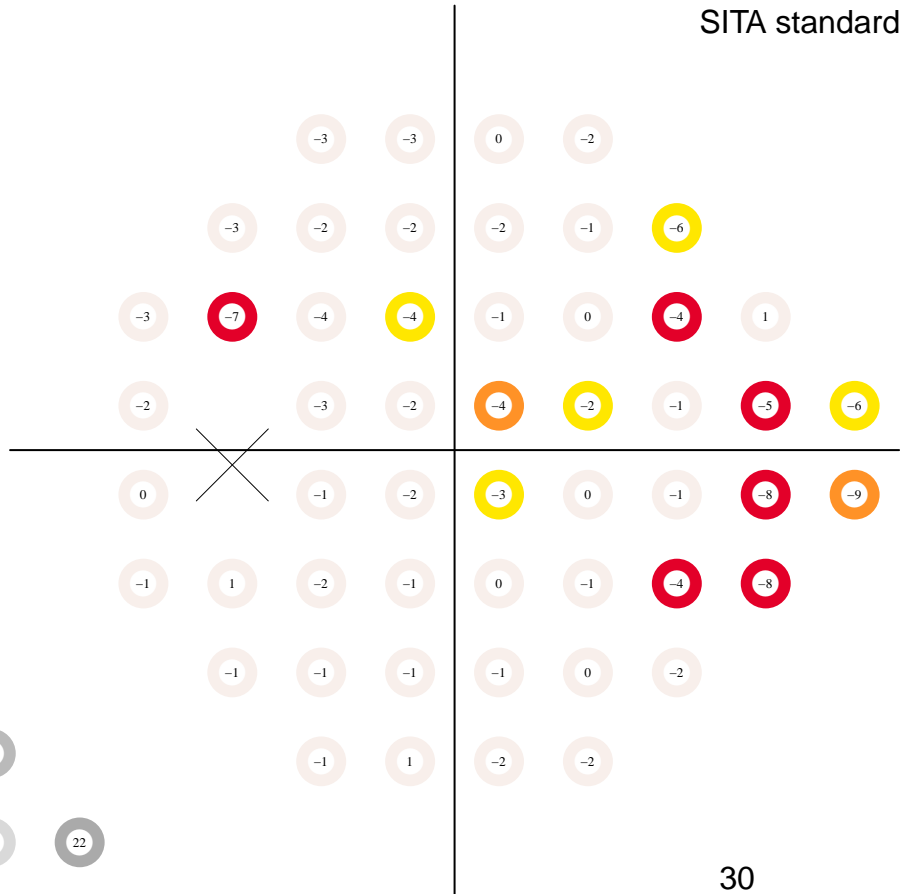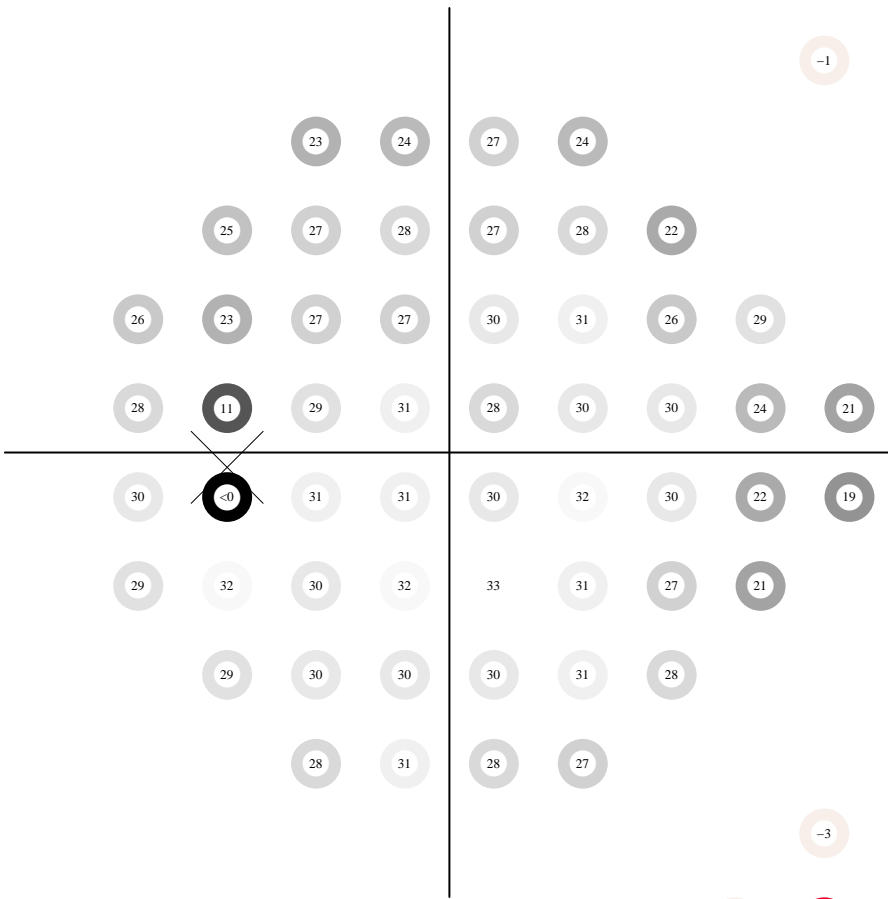

pattern deviation

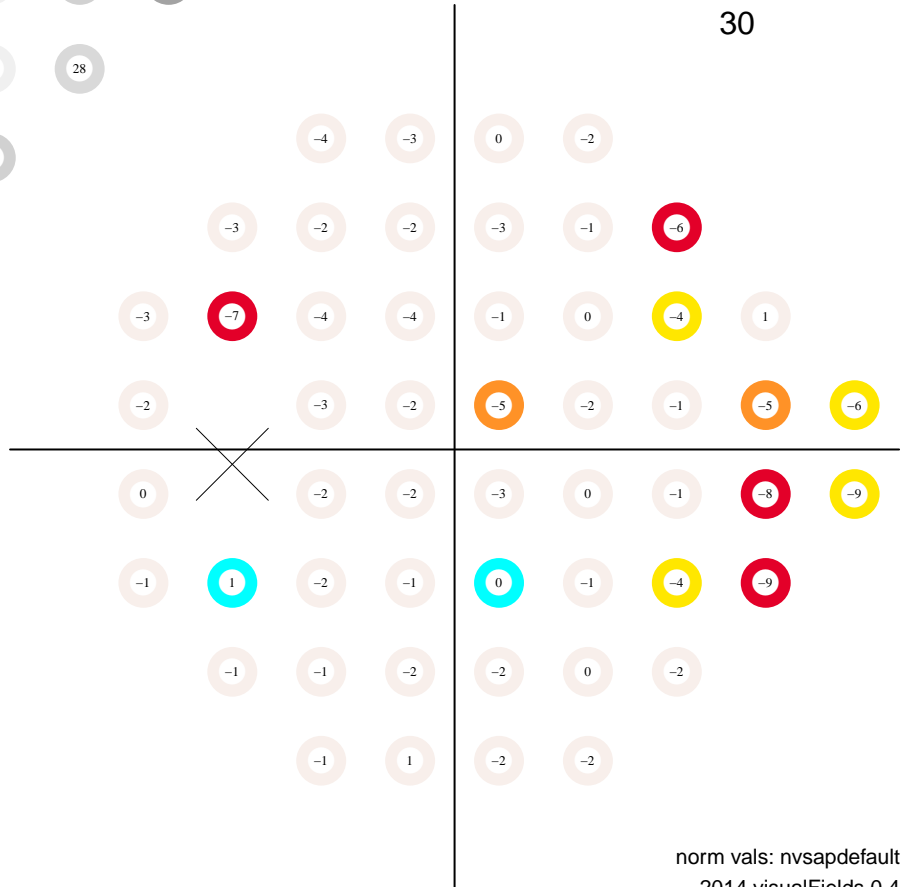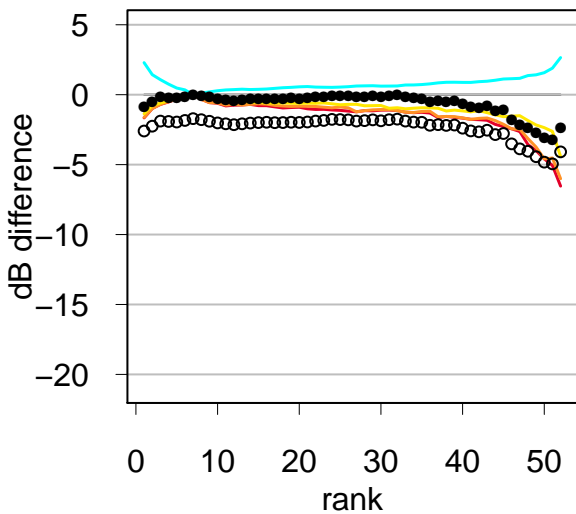

# Static Automated Perimetry. Single field analysis

Subject ID: 1004, age: 58, eye: OS (left)

Date: 09/21/2007 at 8:01:

Duration: 04:36, pause: 00:00

false positives 0.0 %

false negatives 2.0 %

fixation losses 0.0 %

MS 29.4 dB

MD -1.1 dB (p < 95 %)

PSD 2.3 dB (p < 95 %)

VFI 97.0 % (p < 5 %)

GH 1.1 dB

total deviation

Central 24-2  
SITA standard

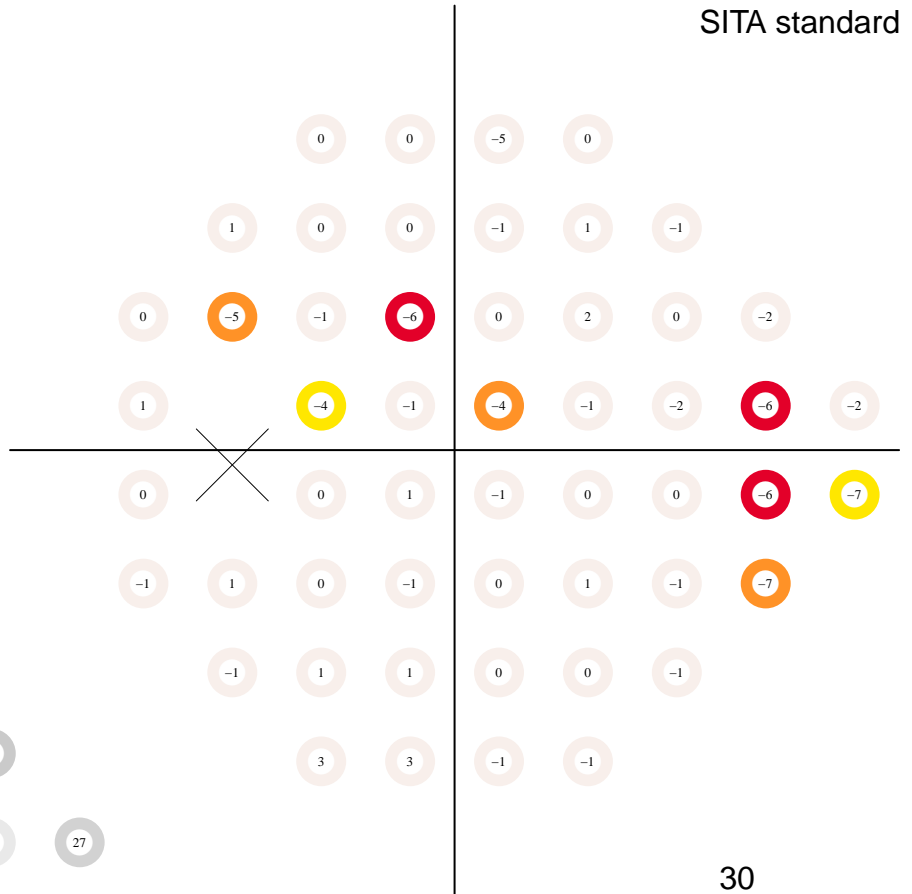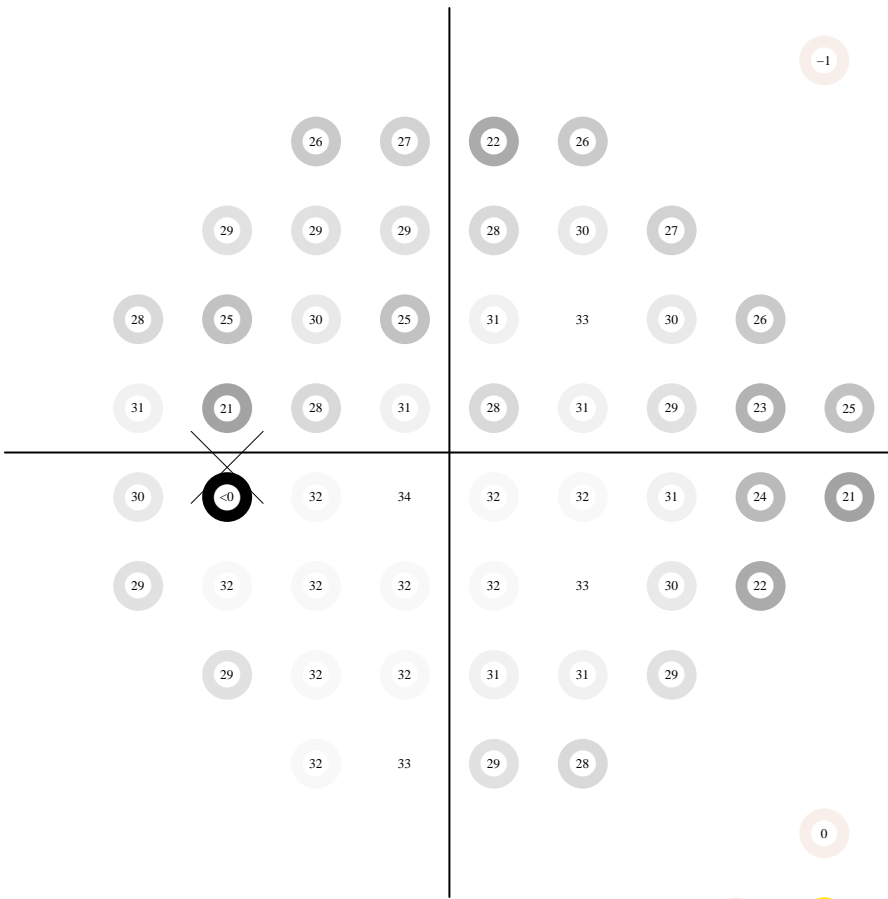

pattern deviation

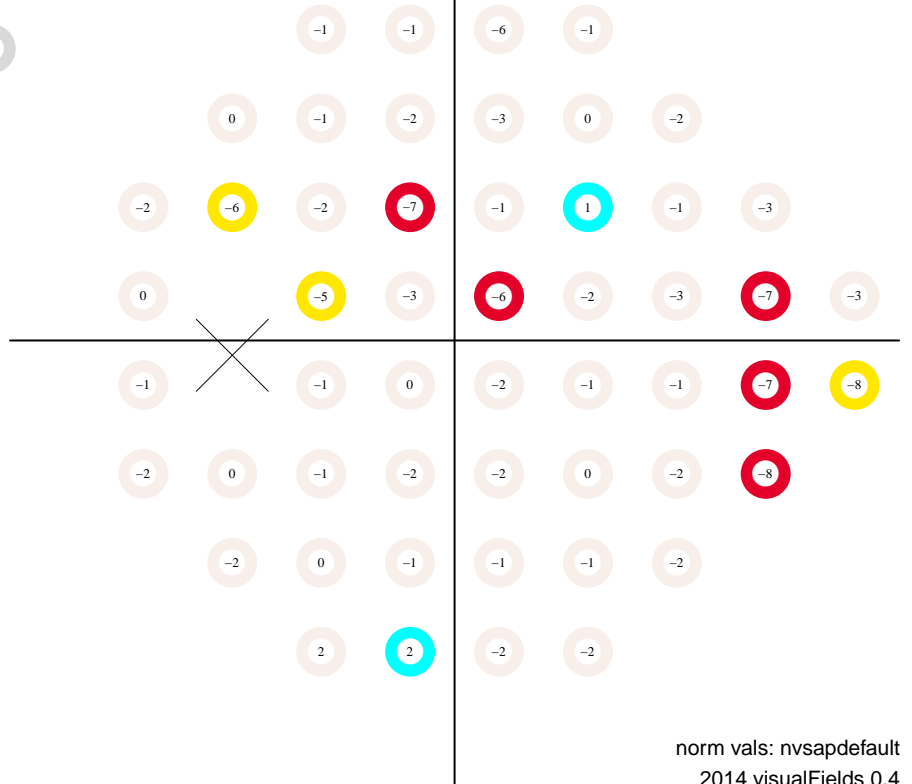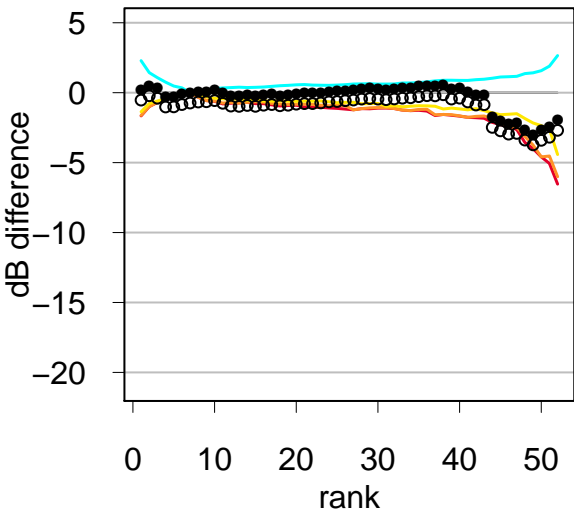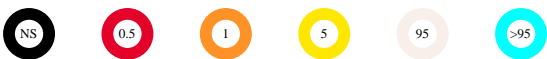

# Static Automated Perimetry. Single field analysis

Subject ID: 1004, age: 58, eye: OS (left)

Date: 10/30/2007 at 7:56:

Duration: 04:29, pause: 00:00

false positives 0.0 %

false negatives 0.0 %

fixation losses 0.0 %

MS 28.7 dB

MD -1.8 dB (p < 95 %)

PSD 4.1 dB (p < 95 %)

VFI 95.0 % (p < 0.5 %)

GH 1.2 dB

total deviation

Central 24-2  
SITA standard

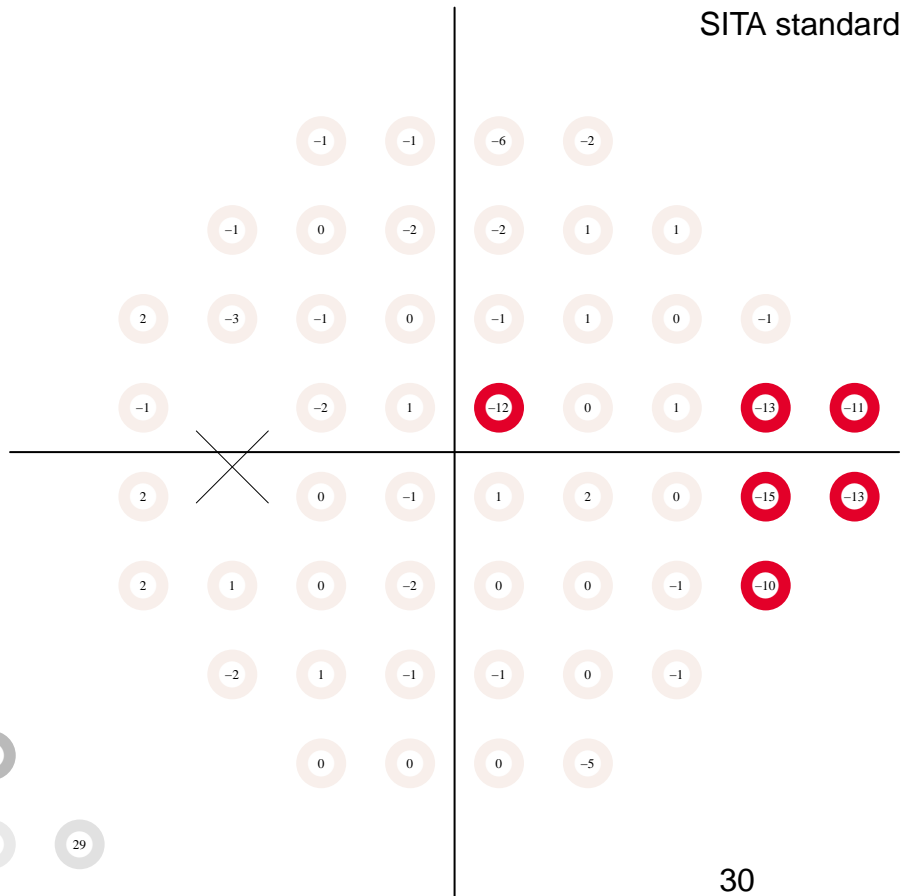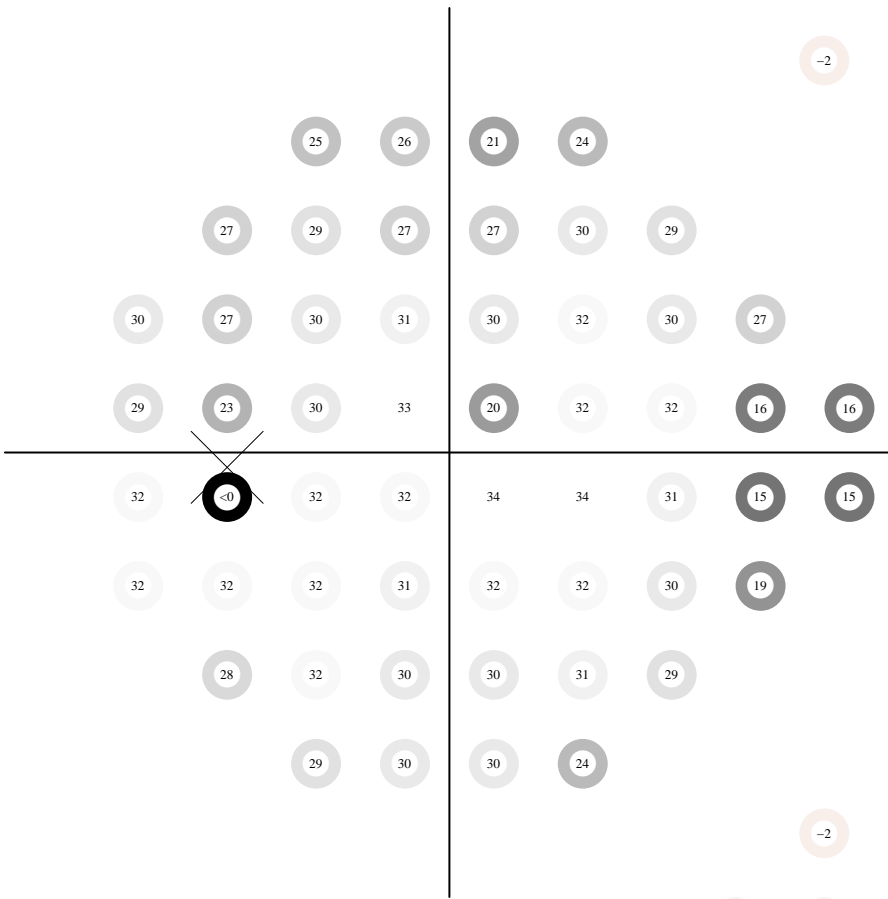

pattern deviation

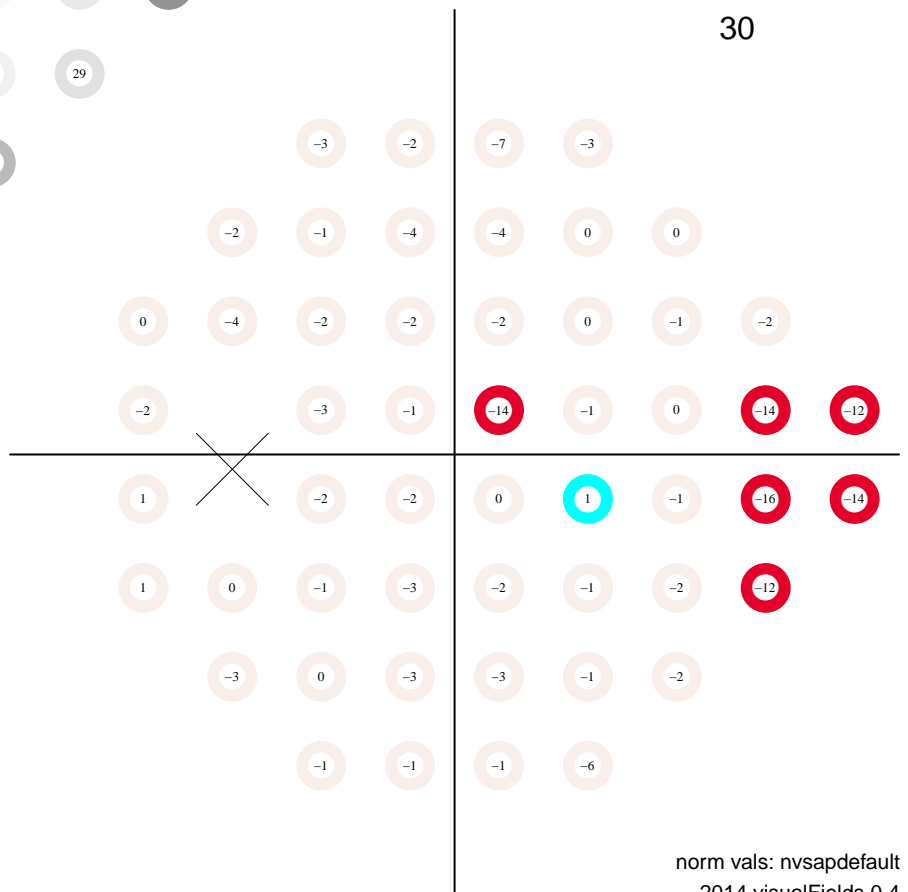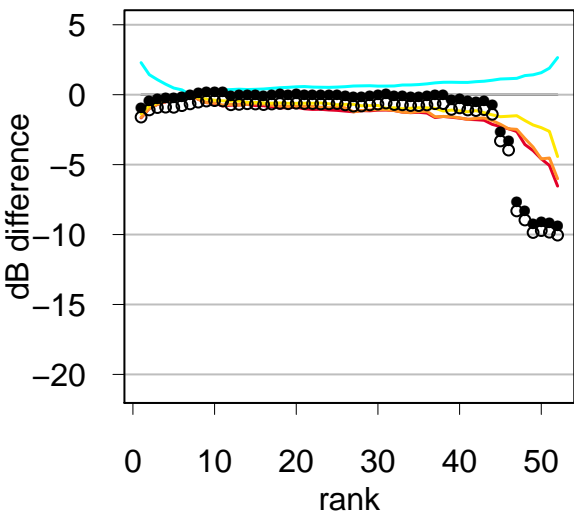

# Static Automated Perimetry. Single field analysis

Subject ID: 1004, age: 58, eye: OS (left)

Date: 03/21/2008 at 7:52:

Duration: 04:42, pause: 00:00

false positives 0.0 %

false negatives 5.0 %

fixation losses 0.0 %

MS 29.0 dB

MD -1.5 dB (p < 95 %)

PSD 2.7 dB (p < 95 %)

VFI 95.2 % (p < 0.5 %)

GH 1.2 dB

total deviation

Central 24-2  
SITA standard

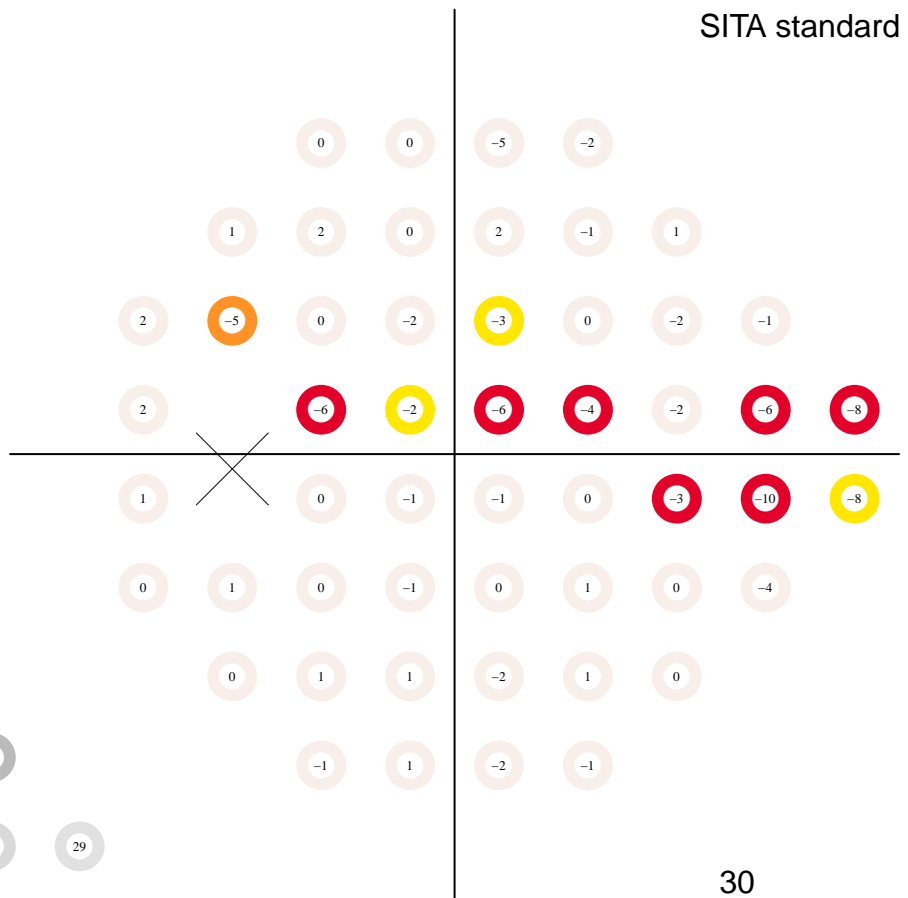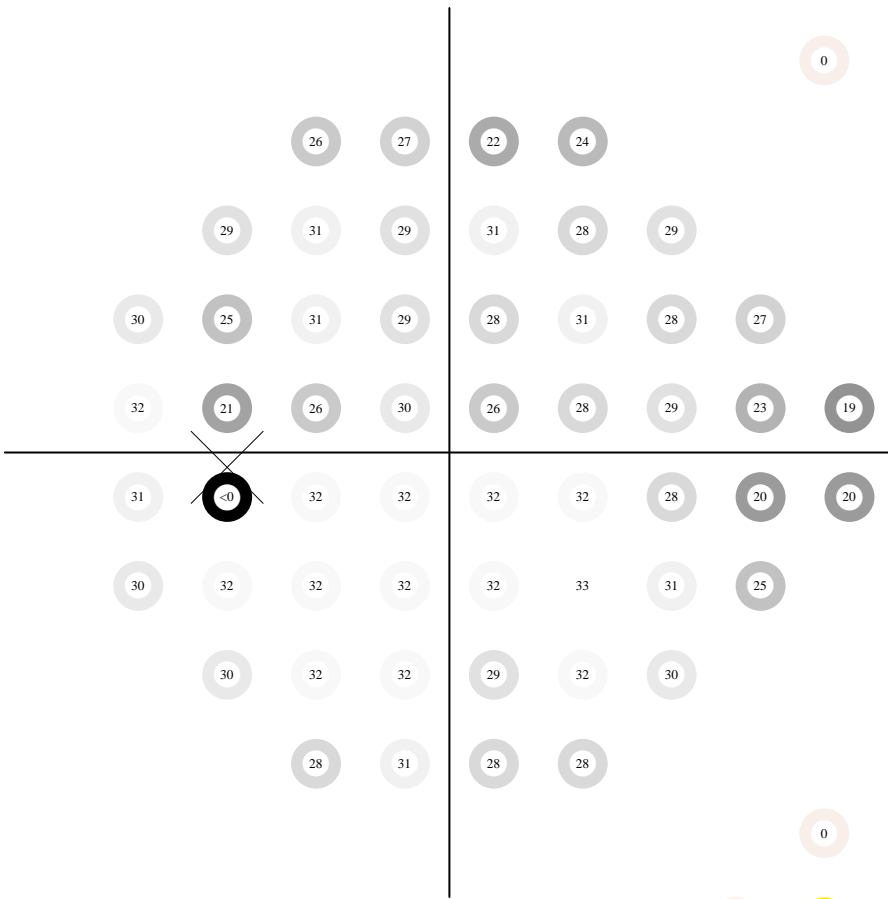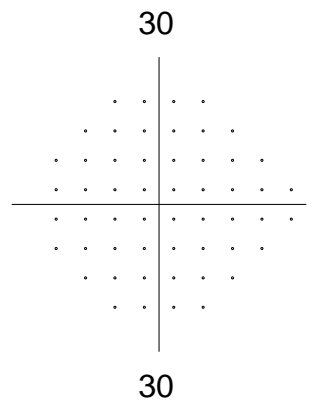

pattern deviation

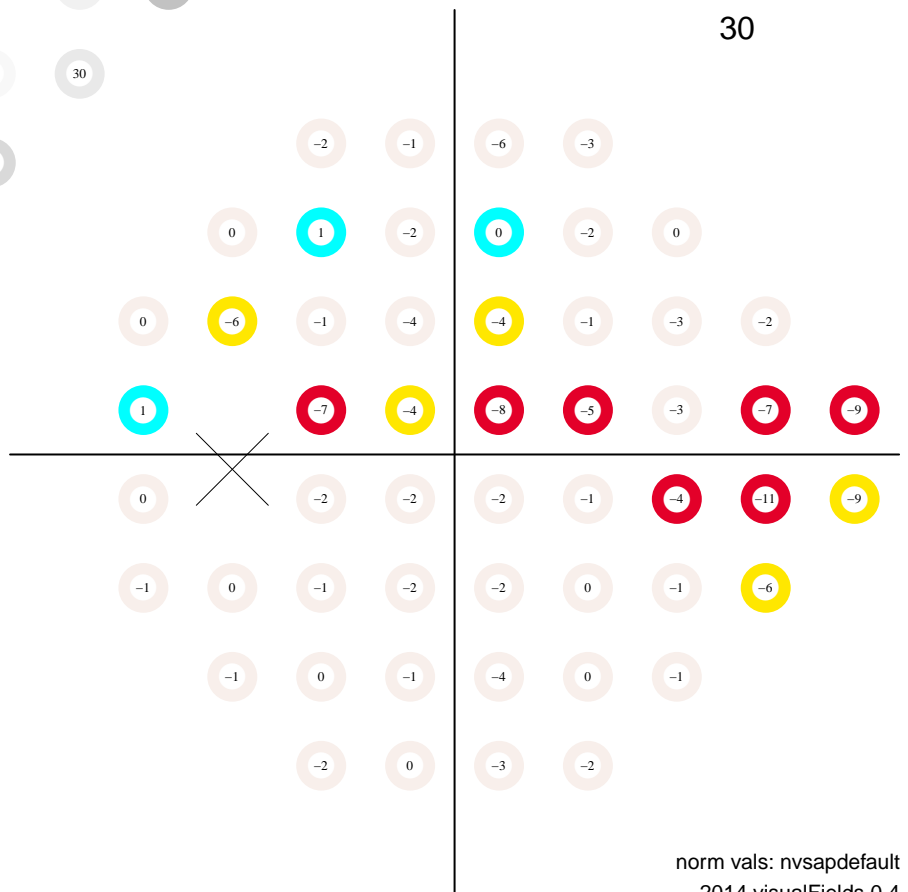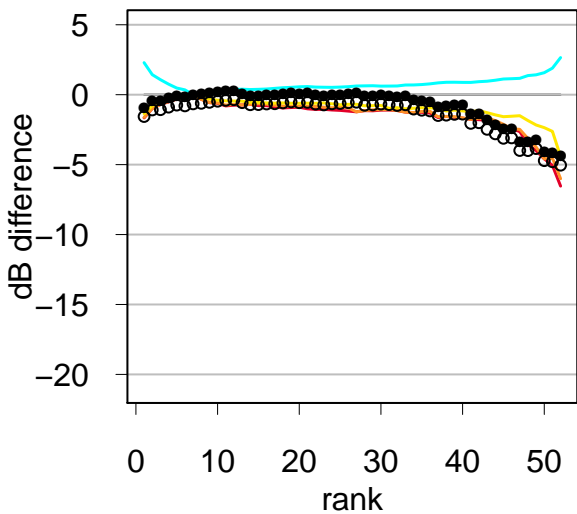



# Static Automated Perimetry. Single field analysis

Subject ID: 1004, age: 58, eye: OS (left)

Date: 04/22/2008 at 8:44:

Duration: 05:17, pause: 00:00

false positives 2.0 %

false negatives 2.0 %

fixation losses 0.0 %

MS 29.1 dB

MD -1.4 dB (p < 95 %)

PSD 3.6 dB (p < 95 %)

VFI 94.8 % (p < 0.5 %)

GH 2.0 dB

total deviation

Central 24-2  
SITA standard

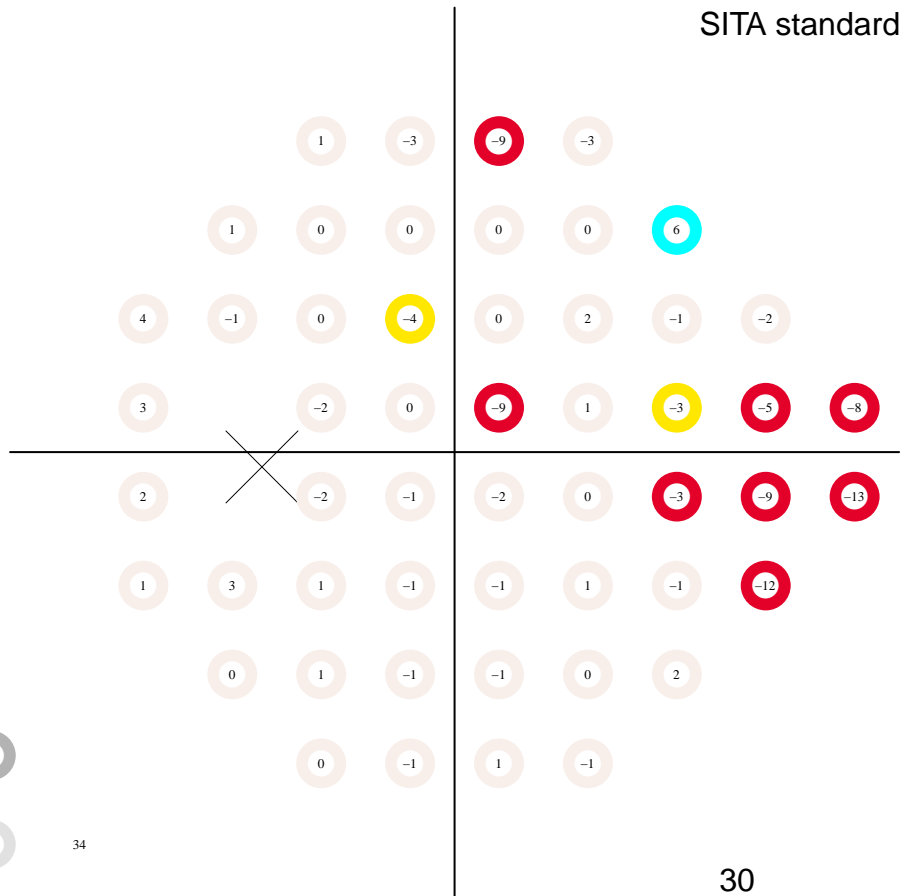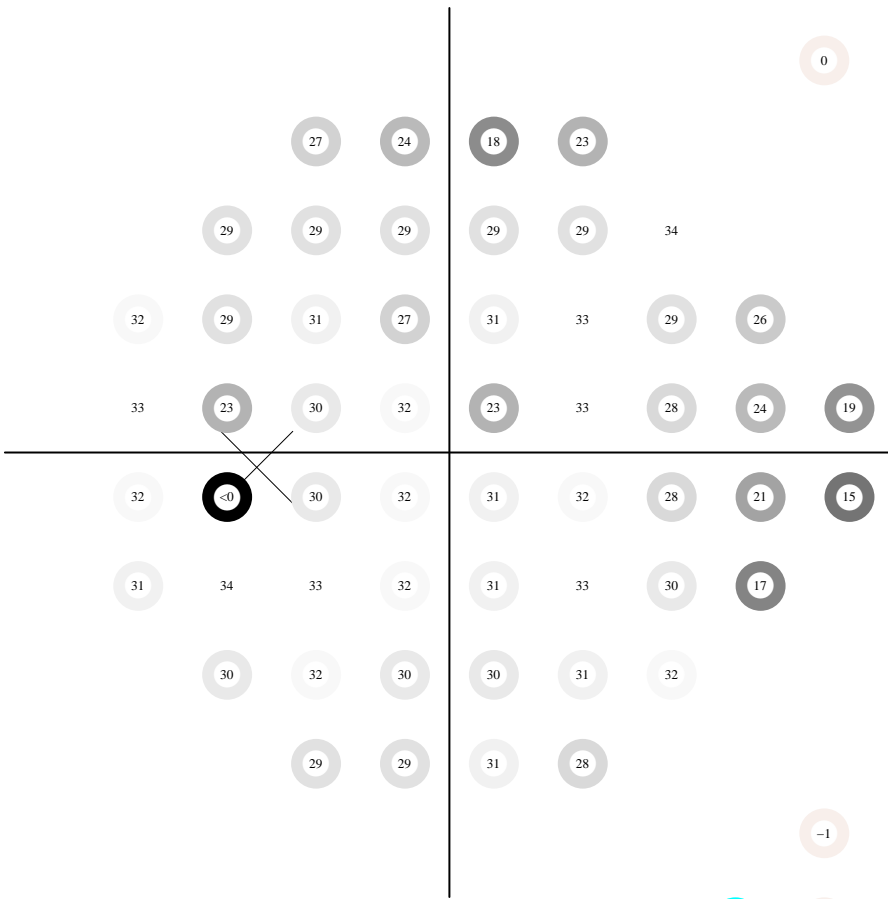

pattern deviation

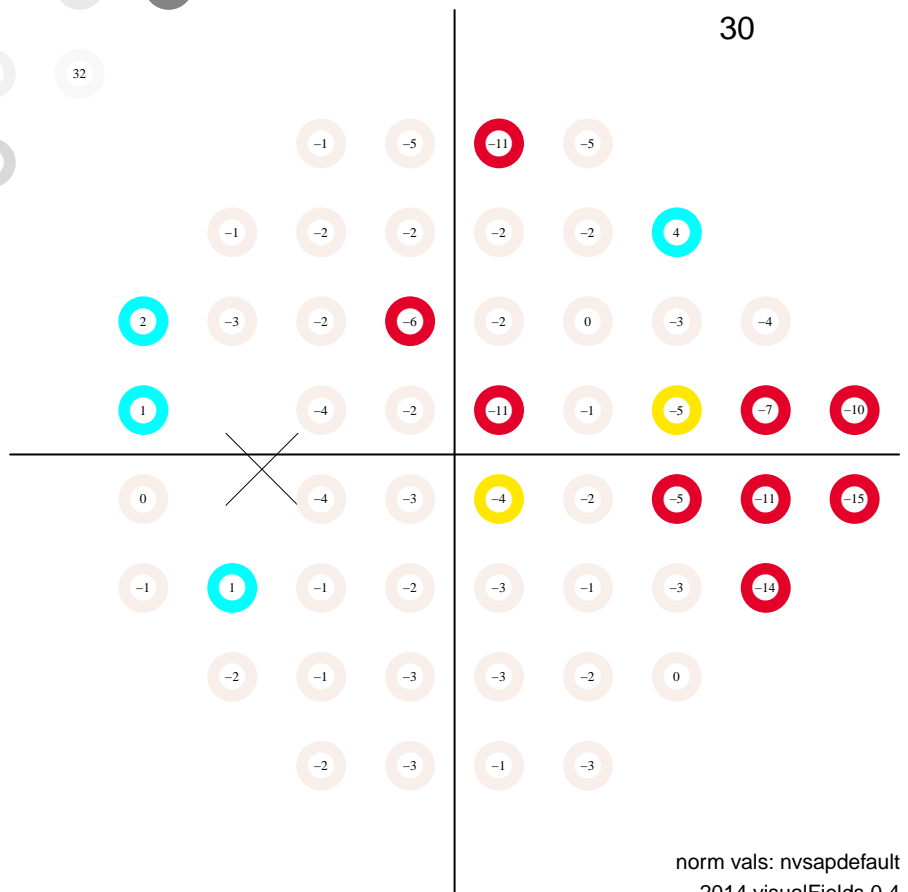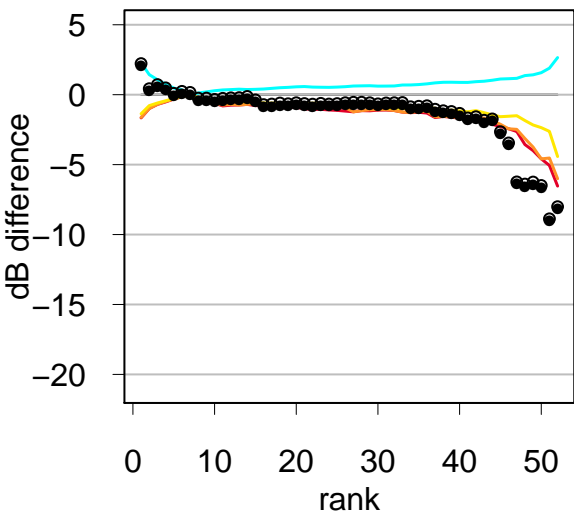



# Static Automated Perimetry. Single field analysis

Subject ID: 1004, age: 59, eye: OS (left)

Date: 12/09/2008 at 14:20

Duration: 04:54, pause: 00:00

false positives 0.0 %

false negatives 6.0 %

fixation losses 0.0 %

MS 28.0 dB

MD -2.4 dB (p < 95 %)

PSD 3.4 dB (p < 95 %)

VFI 94.6 % (p < 0.5 %)

GH 0.6 dB

total deviation

Central 24-2  
SITA standard

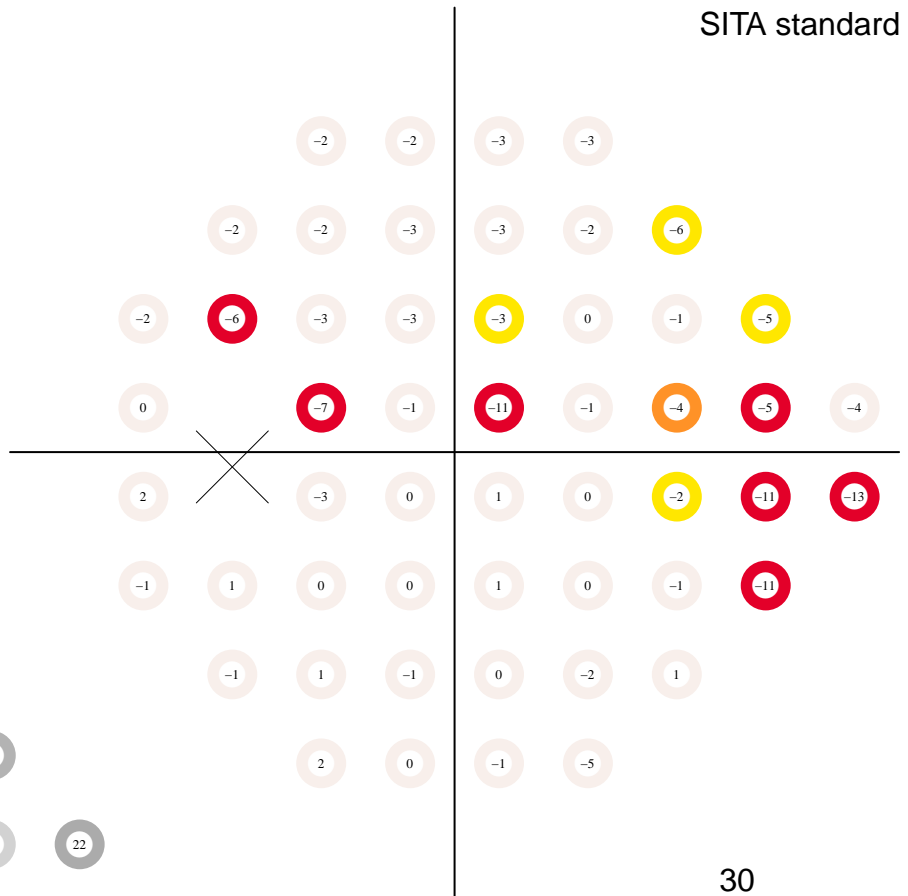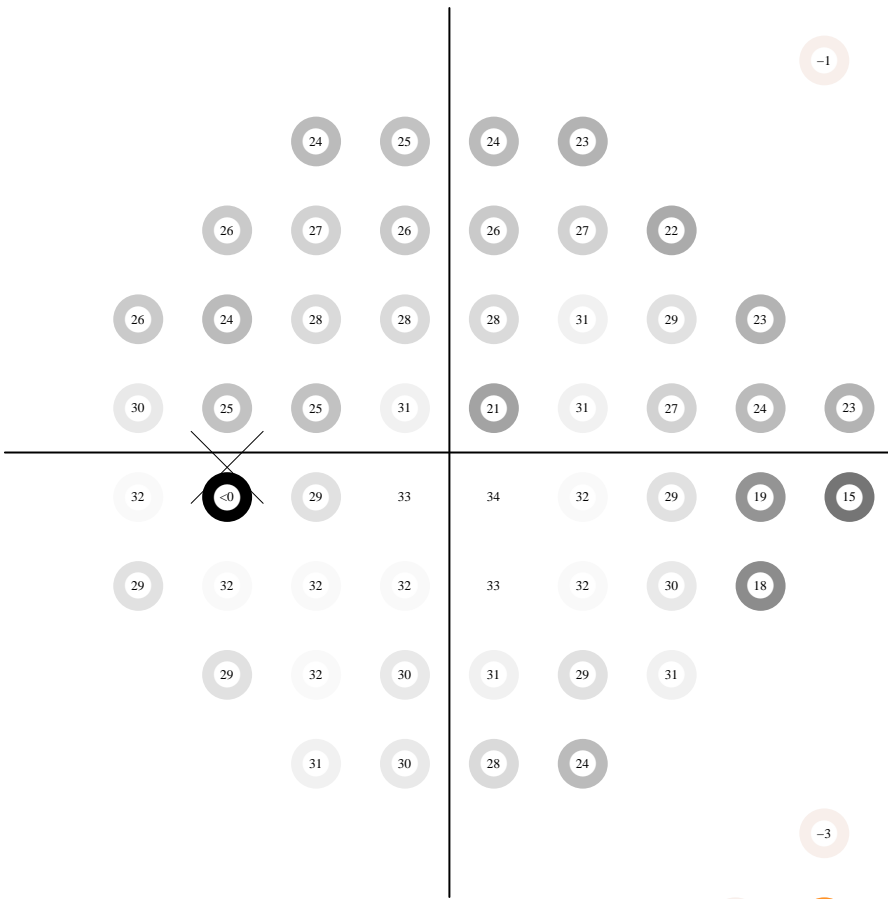

pattern deviation

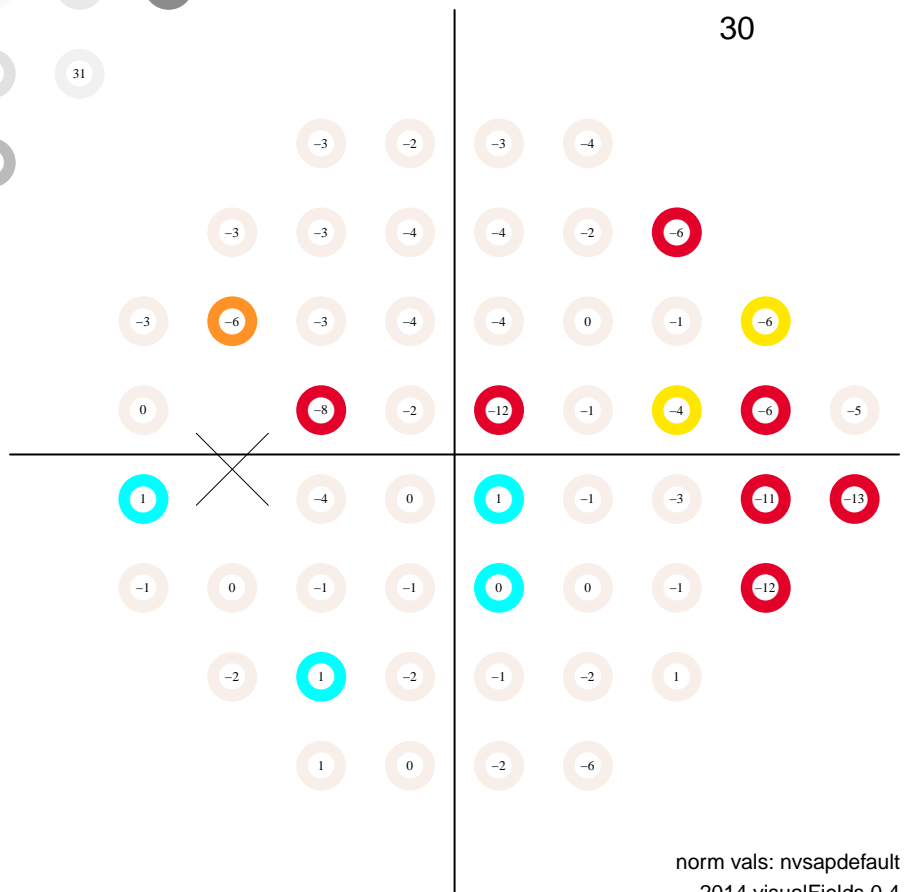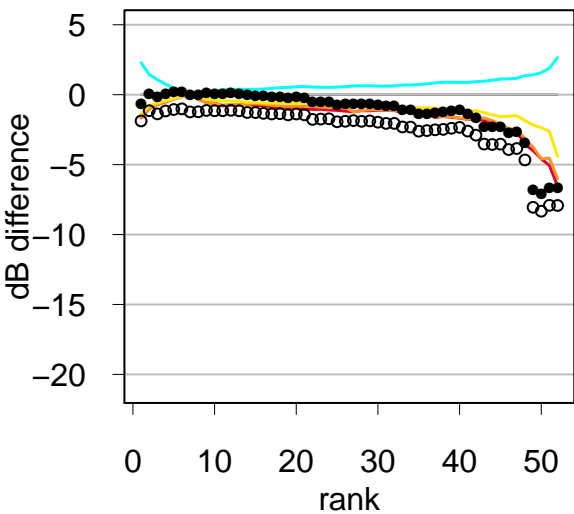

# Static Automated Perimetry. Single field analysis

Subject ID: 1004, age: 59, eye: OS (left)

Date: 05/19/2009 at 9:31:

Duration: 04:10, pause: 00:00

false positives 0.0 %

false negatives 0.0 %

fixation losses 6.7 %

MS 30.3 dB

MD -0.1 dB (p < 95 %)

PSD 3.3 dB (p < 95 %)

VFI 97.7 % (p < 95 %)

GH 2.2 dB

total deviation

Central 24-2  
SITA standard

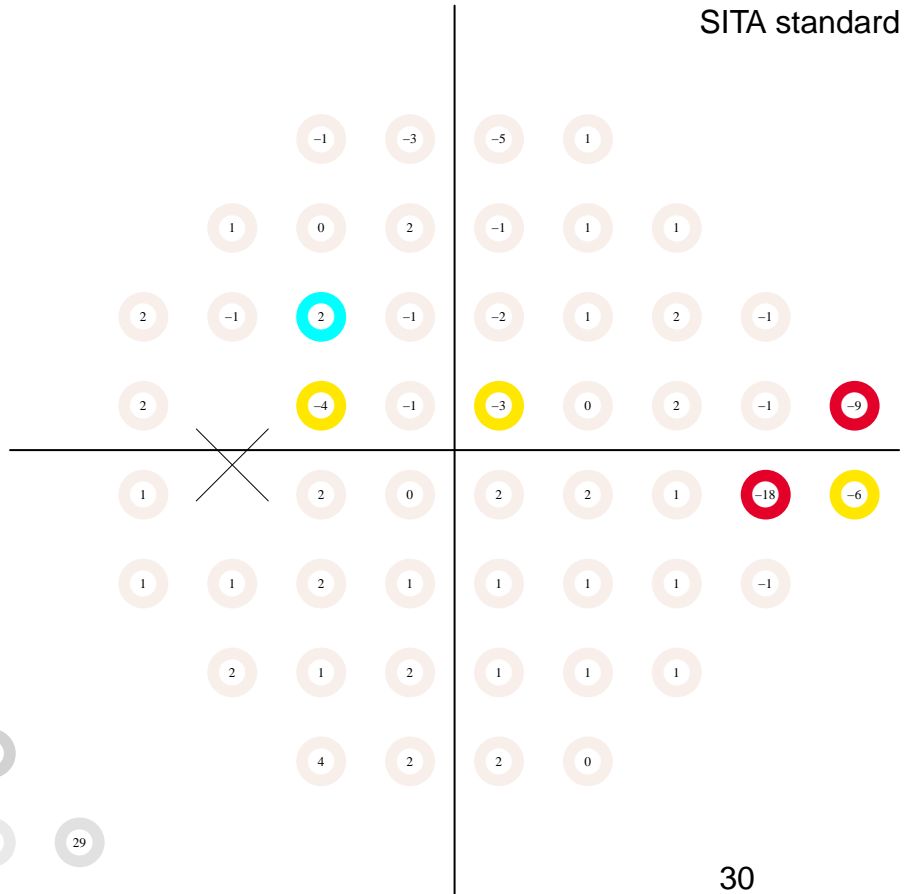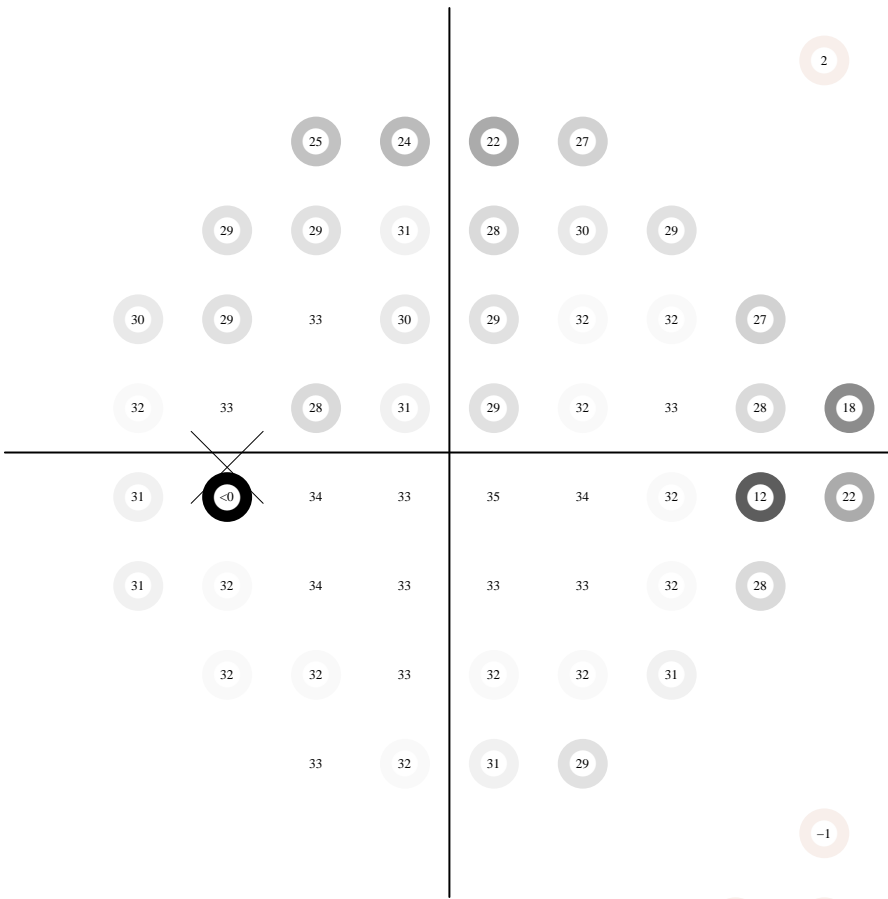

pattern deviation

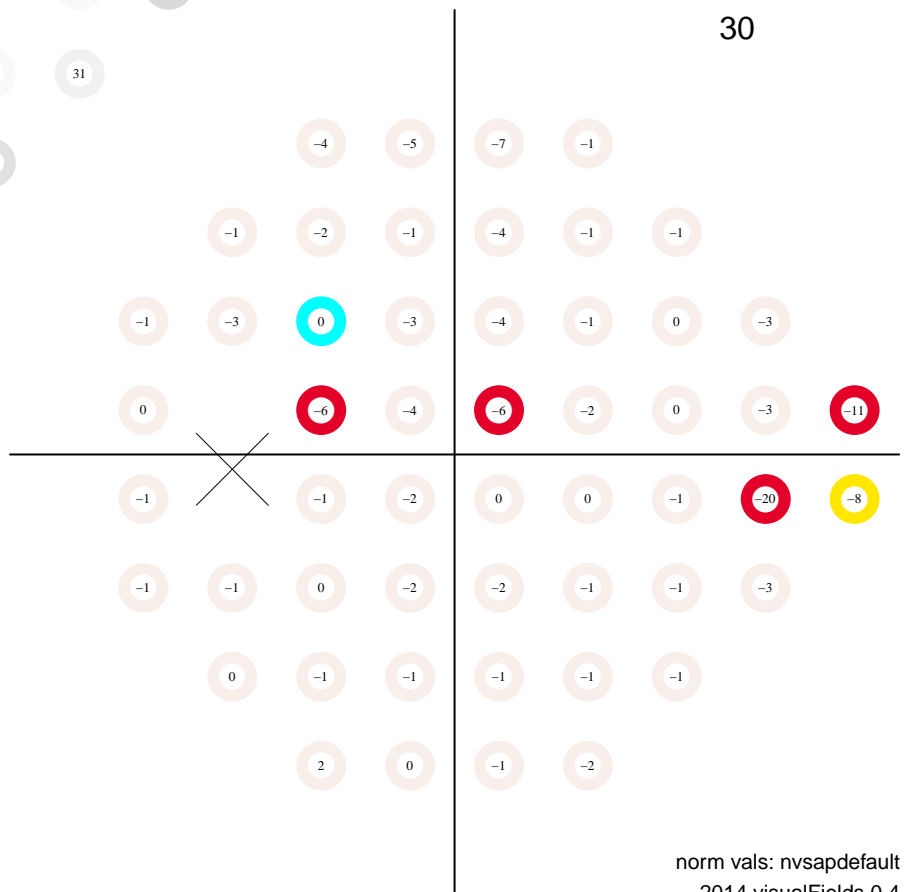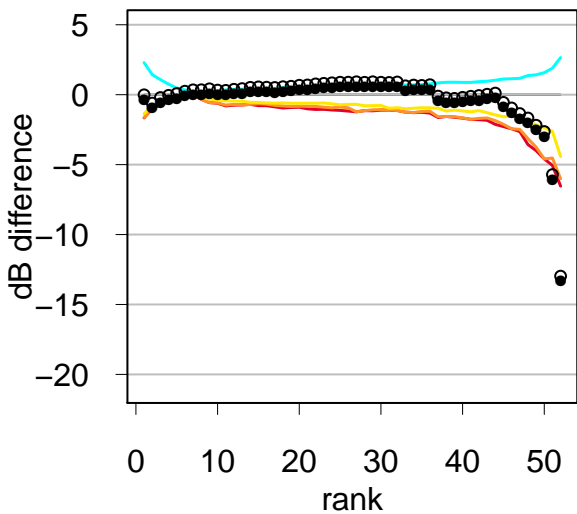

# Static Automated Perimetry. Single field analysis

Subject ID: 1004, age: 59, eye: OS (left)

Date: 05/27/2009 at 9:27:

Duration: 04:19, pause: 00:00

false positives 0.0 %

false negatives 2.0 %

fixation losses 0.0 %

MS 30.9 dB

MD 0.5 dB (p < 95 %)

PSD 2.8 dB (p < 95 %)

VFI 97.9 % (p < 95 %)

GH 3.1 dB

total deviation

Central 24-2  
SITA standard

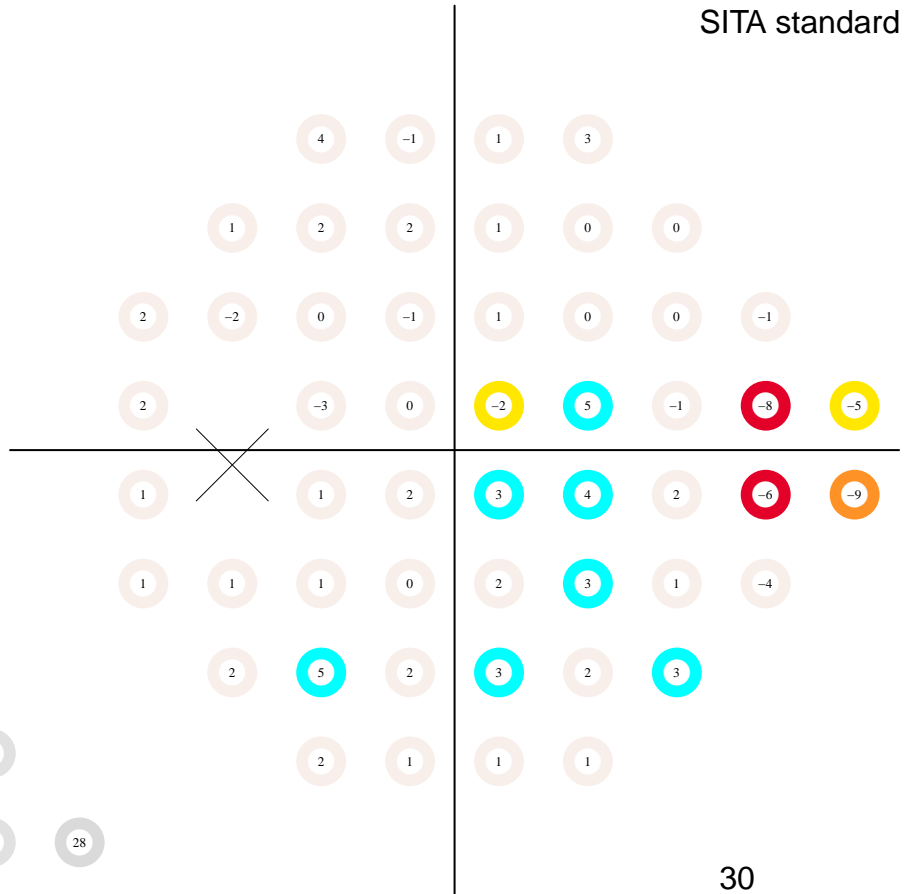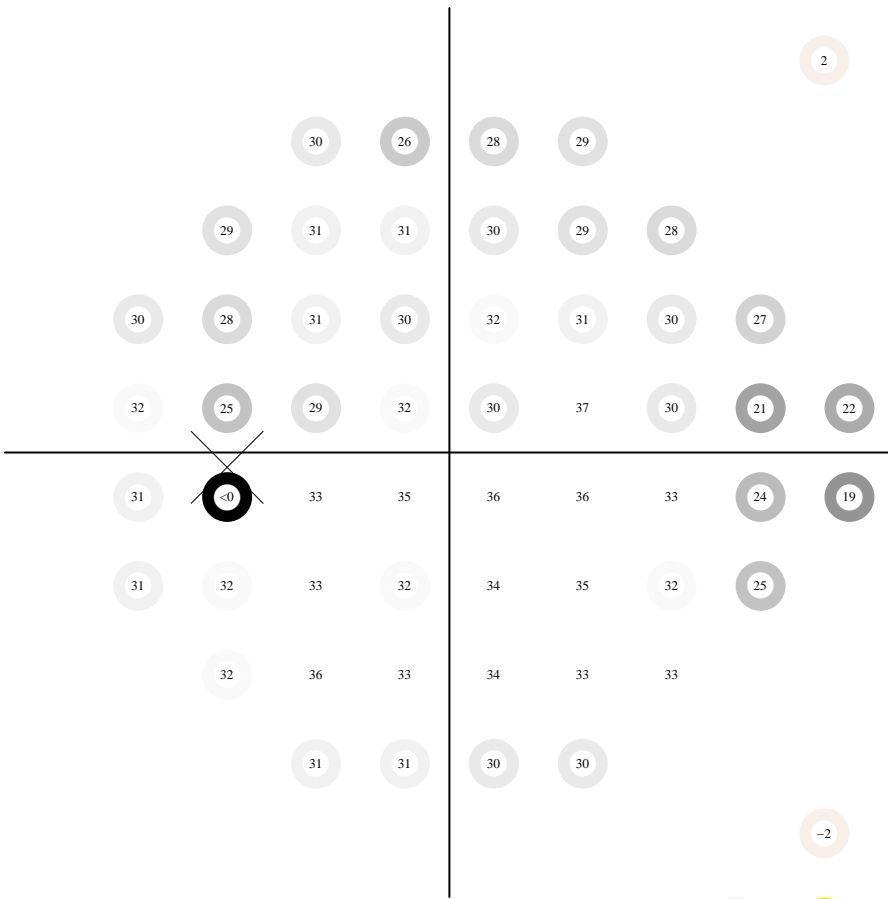

pattern deviation

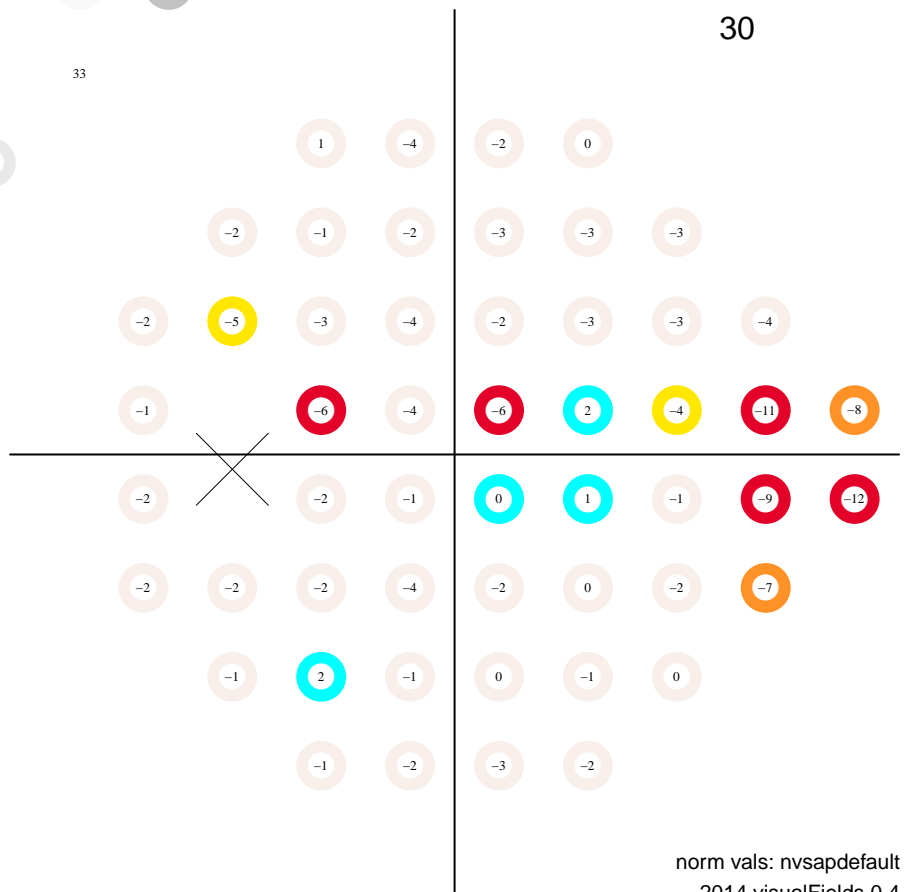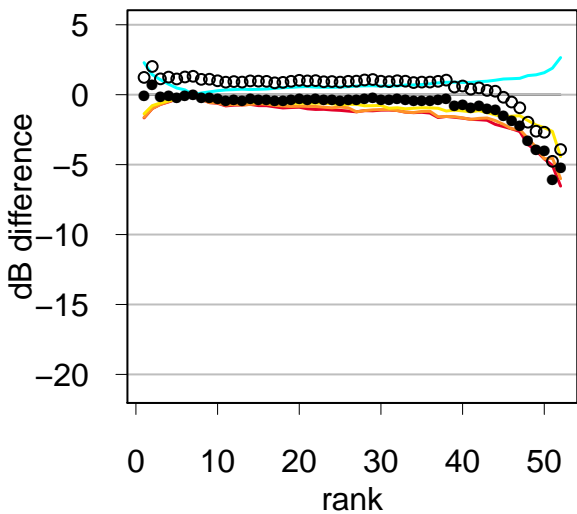

# Static Automated Perimetry. Single field analysis

Subject ID: 1004, age: 59, eye: OS (left)

Date: 06/23/2009 at 13:13

Duration: 04:37, pause: 00:00

false positives 5.0 %

false negatives 3.0 %

fixation losses 13.3 %

MS 28.7 dB

MD -1.7 dB (p < 95 %)

PSD 2.7 dB (p < 95 %)

VFI 96.6 % (p < 1 %)

GH 0.8 dB

total deviation

Central 24-2  
SITA standard

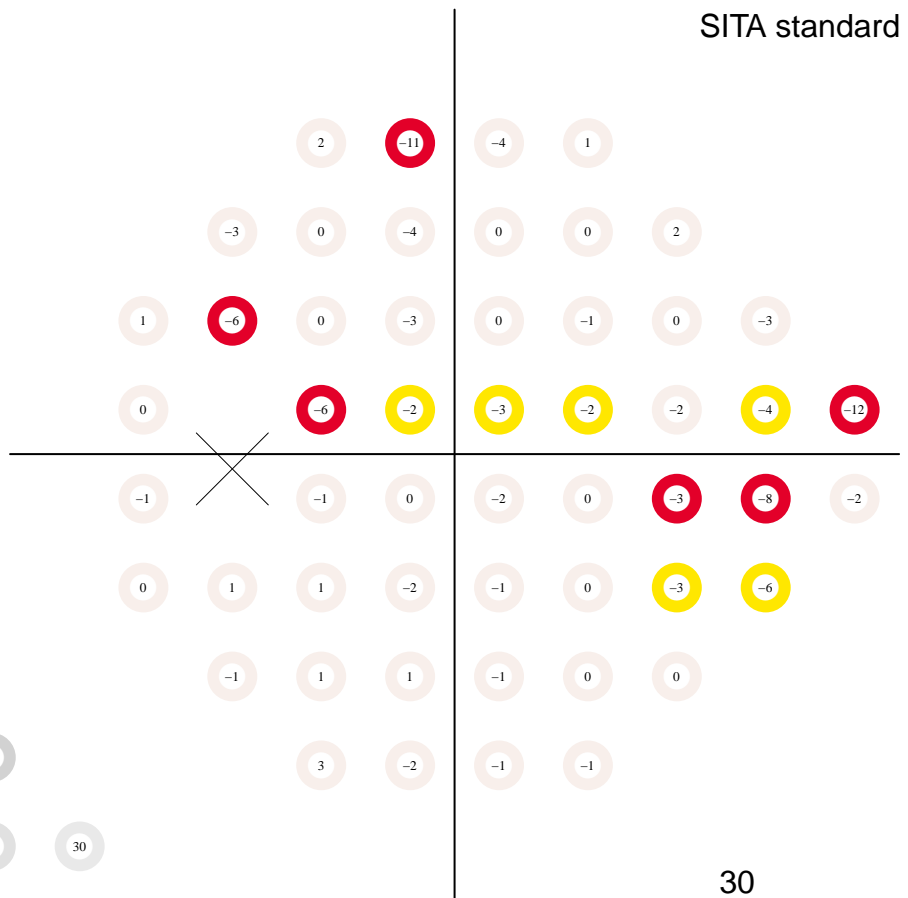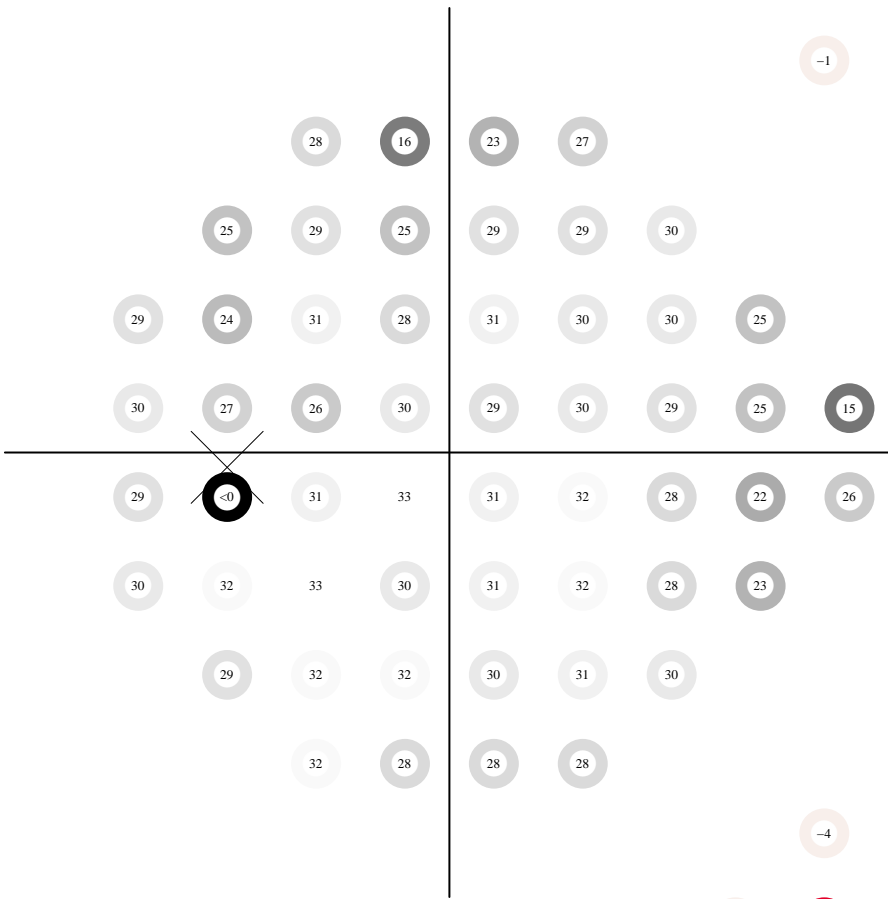

pattern deviation

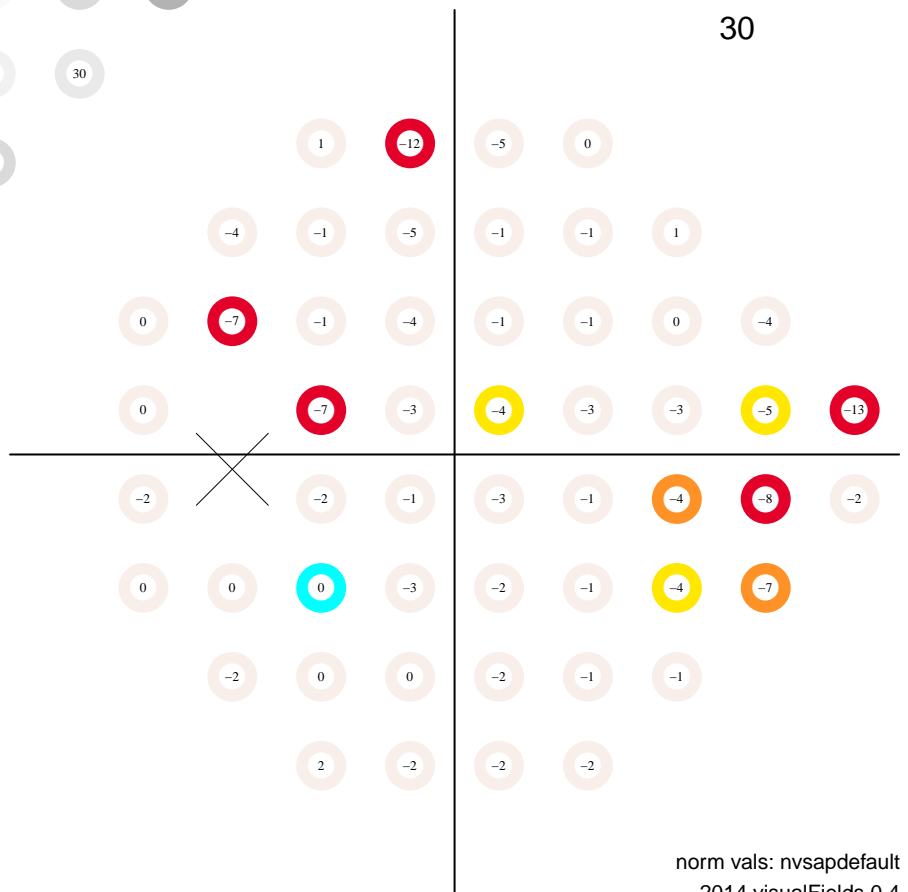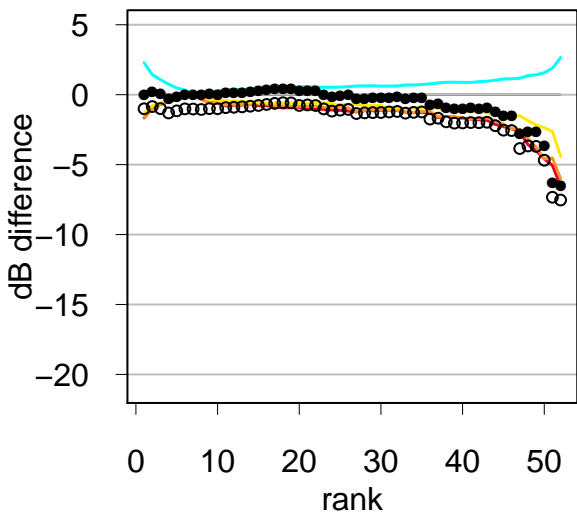

# Static Automated Perimetry. Single field analysis

Subject ID: 1004, age: 60, eye: OS (left)

Date: 09/14/2009 at 9:20:

Duration: 05:03, pause: 00:00

false positives 2.0 %

false negatives 0.0 %

fixation losses 0.0 %

MS 28.3 dB

MD -2.1 dB (p < 95 %)

PSD 3.7 dB (p < 95 %)

VFI 94.5 % (p < 0.5 %)

GH 0.5 dB

total deviation

Central 24-2  
SITA standard

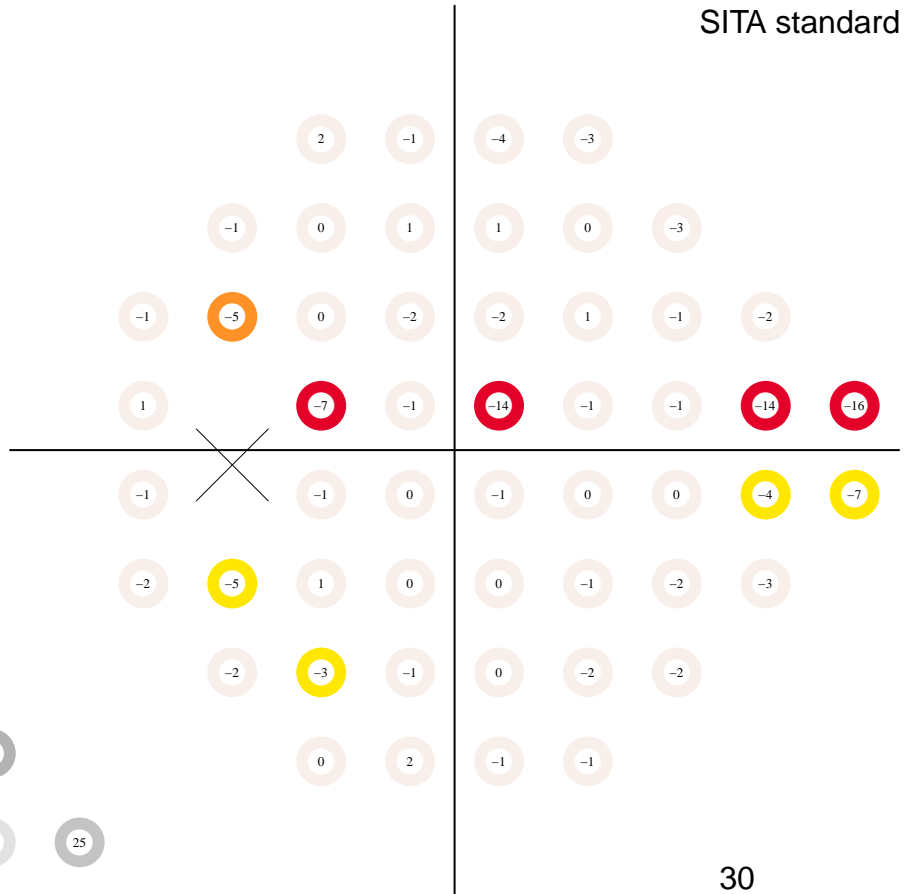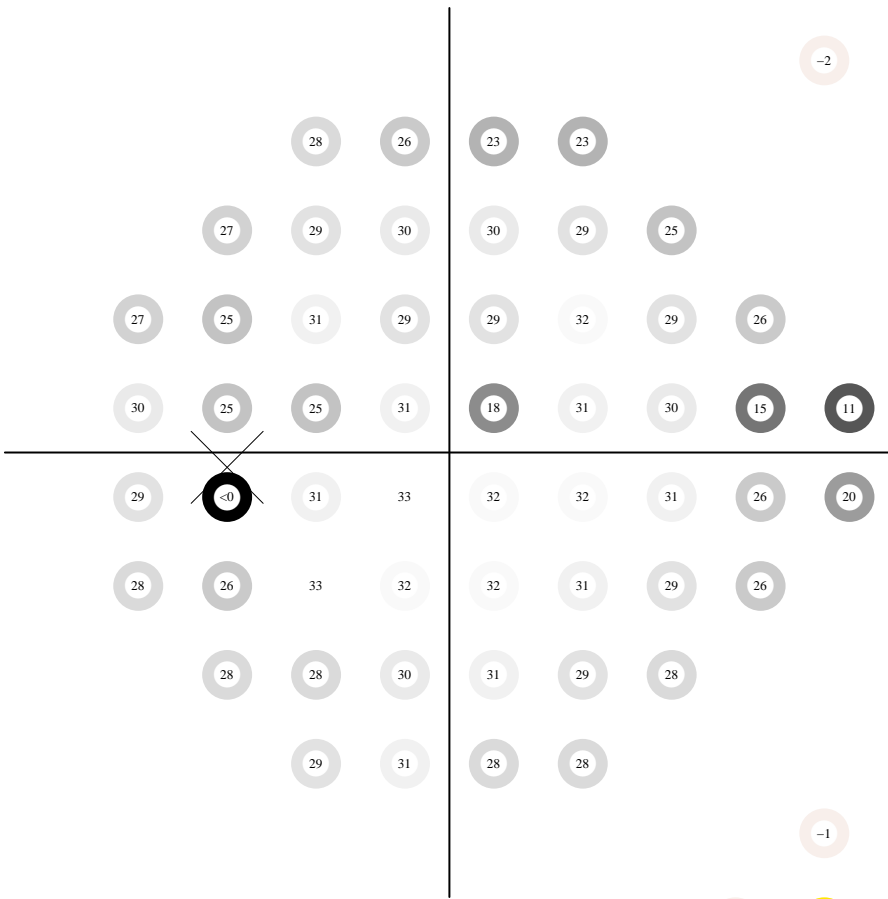

pattern deviation

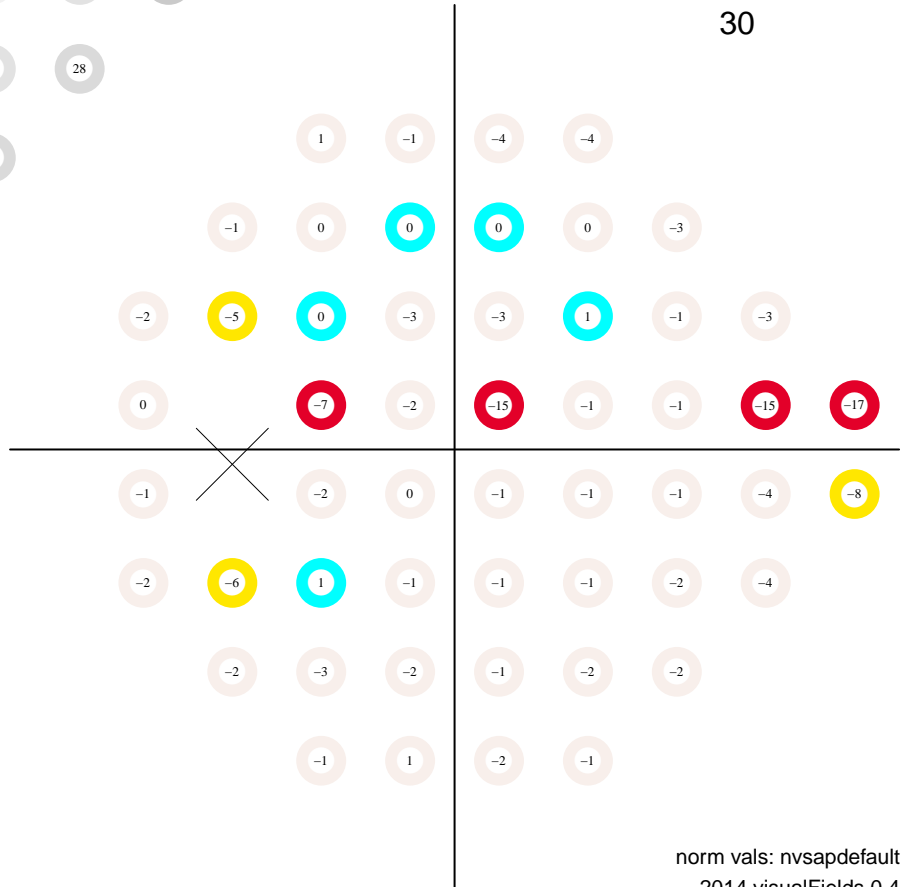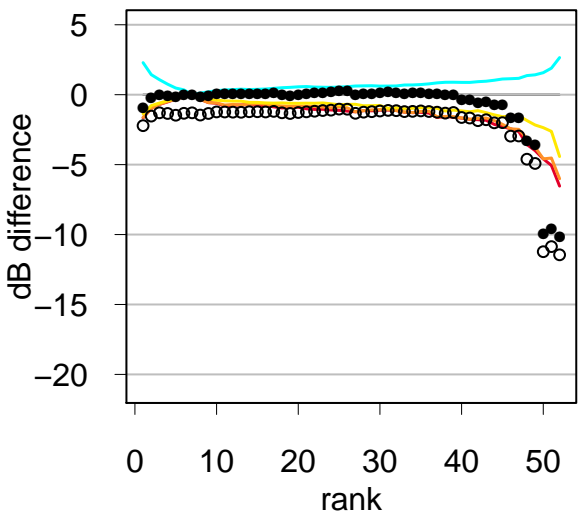











# Static Automated Perimetry. Single field analysis

Subject ID: 1004, age: 62, eye: OS (left)

Date: 11/22/2011 at 8:02:

Duration: 05:02, pause: 00:00

false positives 0.0 %

false negatives 0.0 %

fixation losses 0.0 %

MS 28.1 dB

MD -2.1 dB (p < 95 %)

PSD 2.8 dB (p < 95 %)

VFI 95.5 % (p < 0.5 %)

GH 0.5 dB

total deviation

Central 24-2  
SITA standard

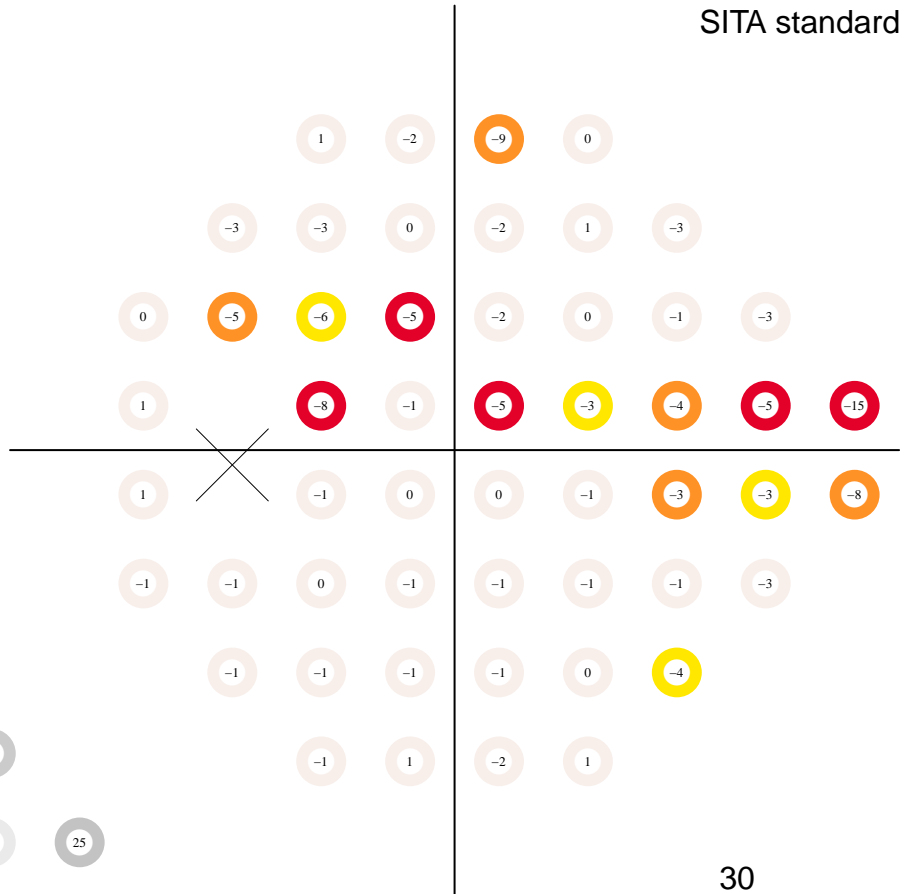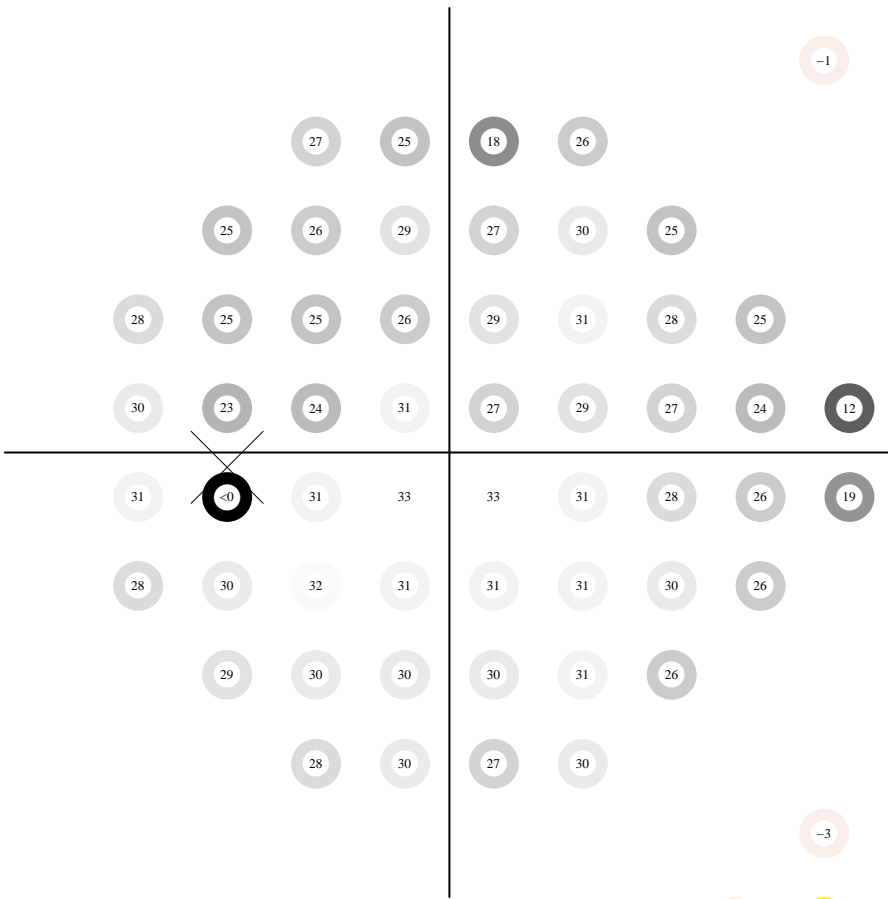

pattern deviation

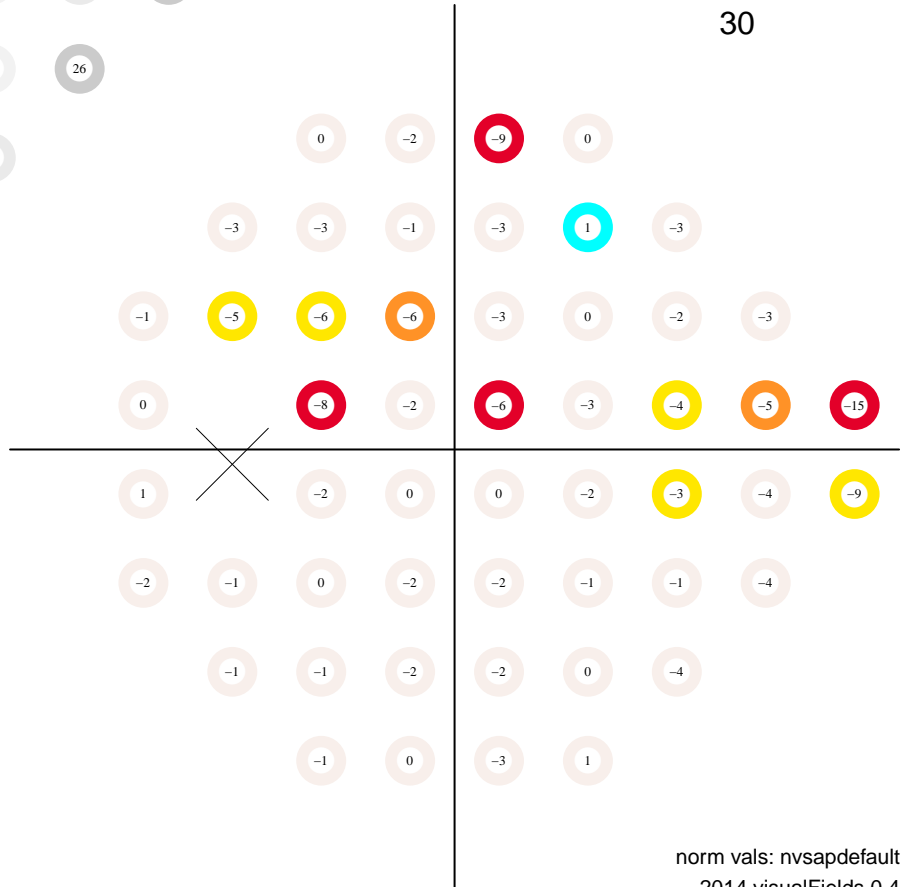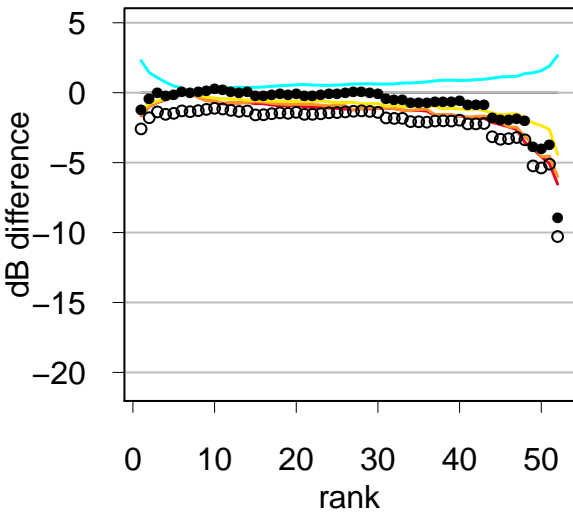

# Static Automated Perimetry. Single field analysis

Subject ID: 1004, age: 62, eye: OS (left)

Date: 02/17/2012 at 8:25:

Duration: 05:02, pause: 00:00

false positives 0.0 %

false negatives 0.0 %

fixation losses 14.3 %

MS 29.1 dB

MD -1.2 dB (p < 95 %)

PSD 3.2 dB (p < 95 %)

VFI 96.1 % (p < 1 %)

GH 1.3 dB

total deviation

Central 24-2  
SITA standard

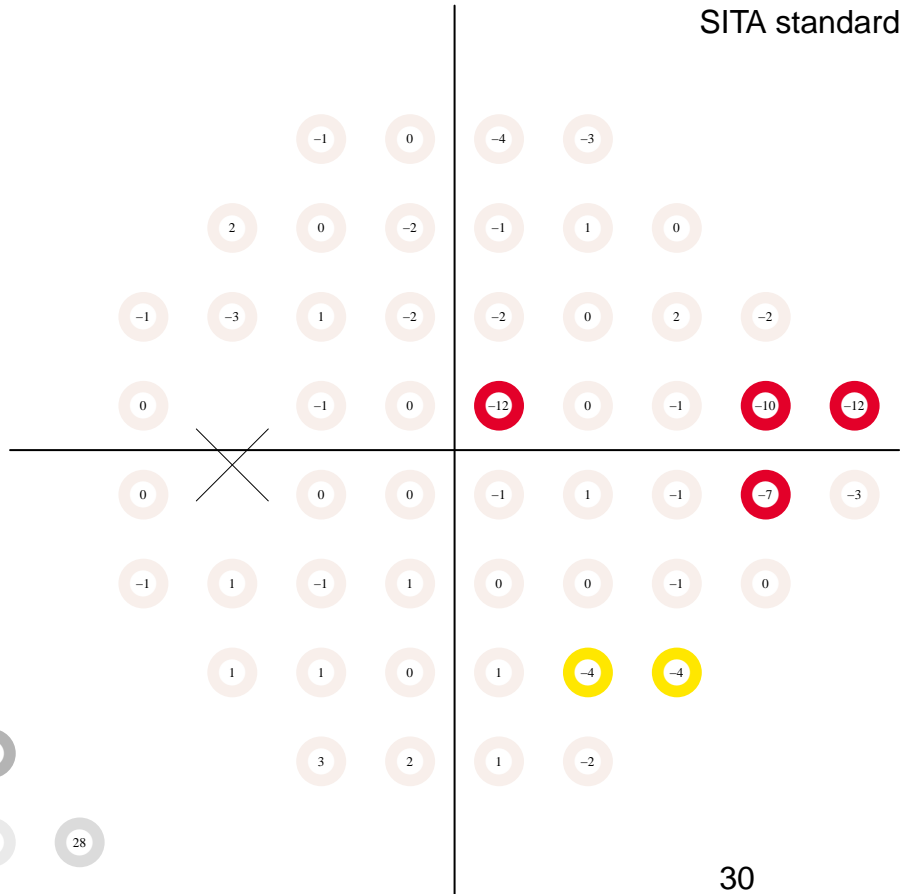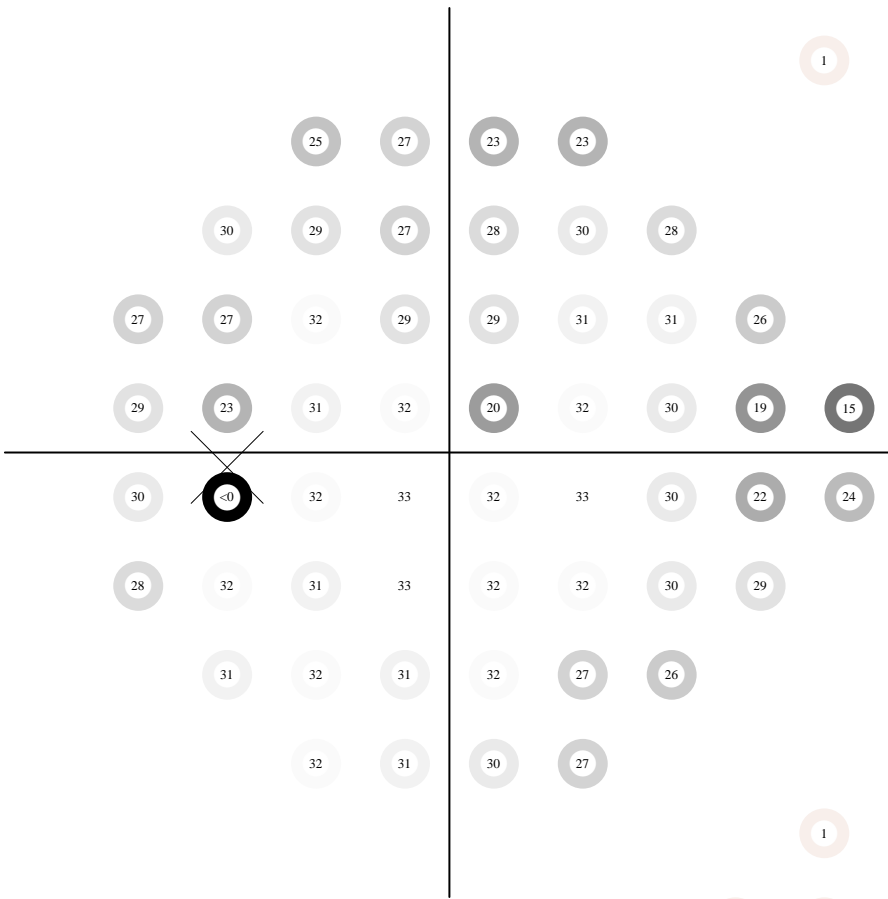

pattern deviation

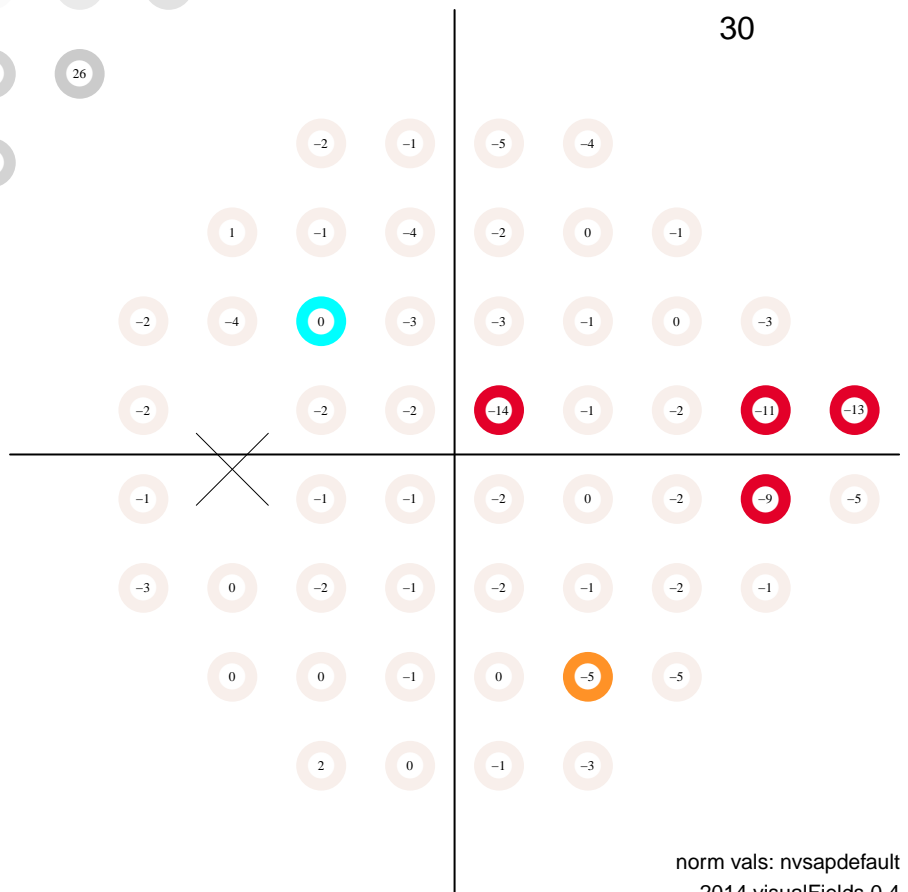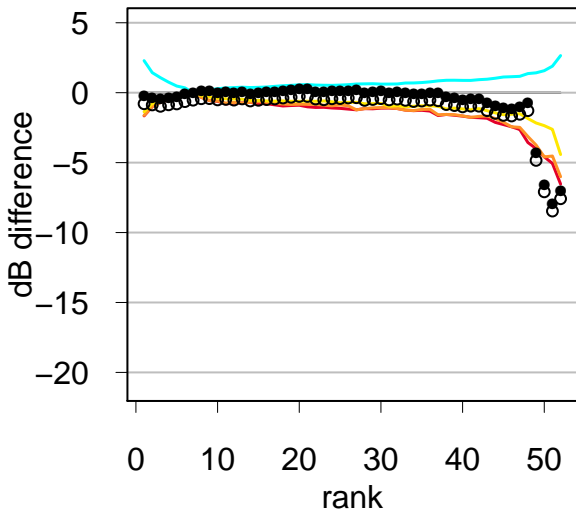

# Static Automated Perimetry. Single field analysis

Subject ID: 1004, age: 62, eye: OS (left)

Date: 03/06/2012 at 8:43:

Duration: 04:40, pause: 00:00

false positives 0.0 %

false negatives 0.0 %

fixation losses 0.0 %

MS 29.5 dB

MD -0.7 dB (p < 95 %)

PSD 2.8 dB (p < 95 %)

VFI 97.1 % (p < 5 %)

GH 1.3 dB

total deviation

Central 24-2  
SITA standard

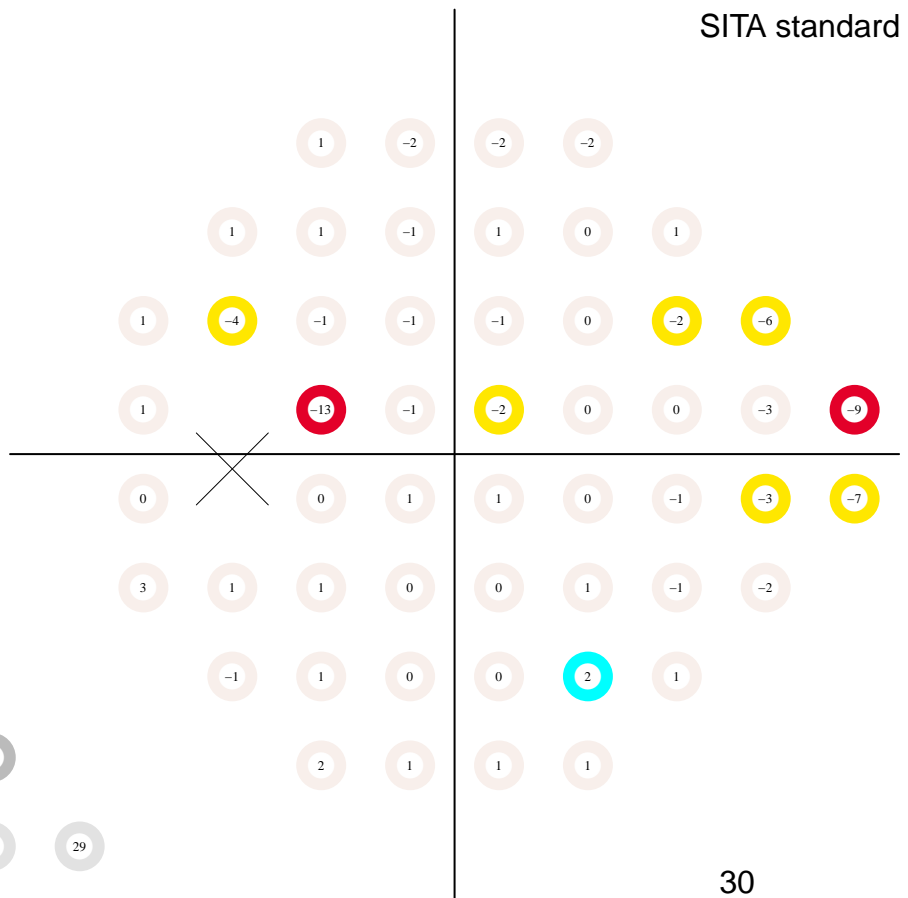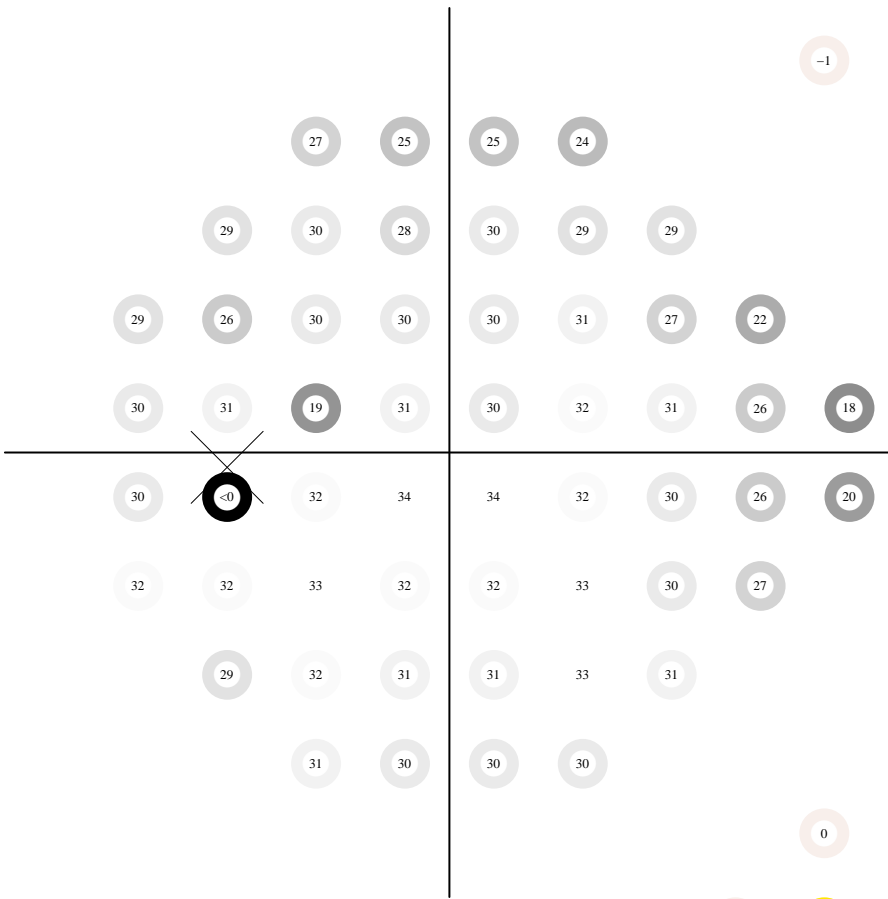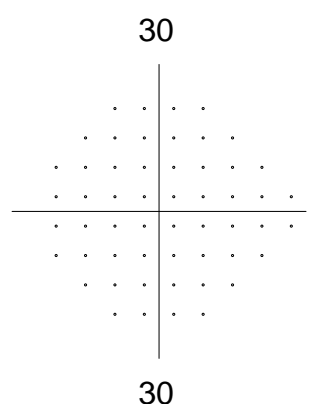

pattern deviation

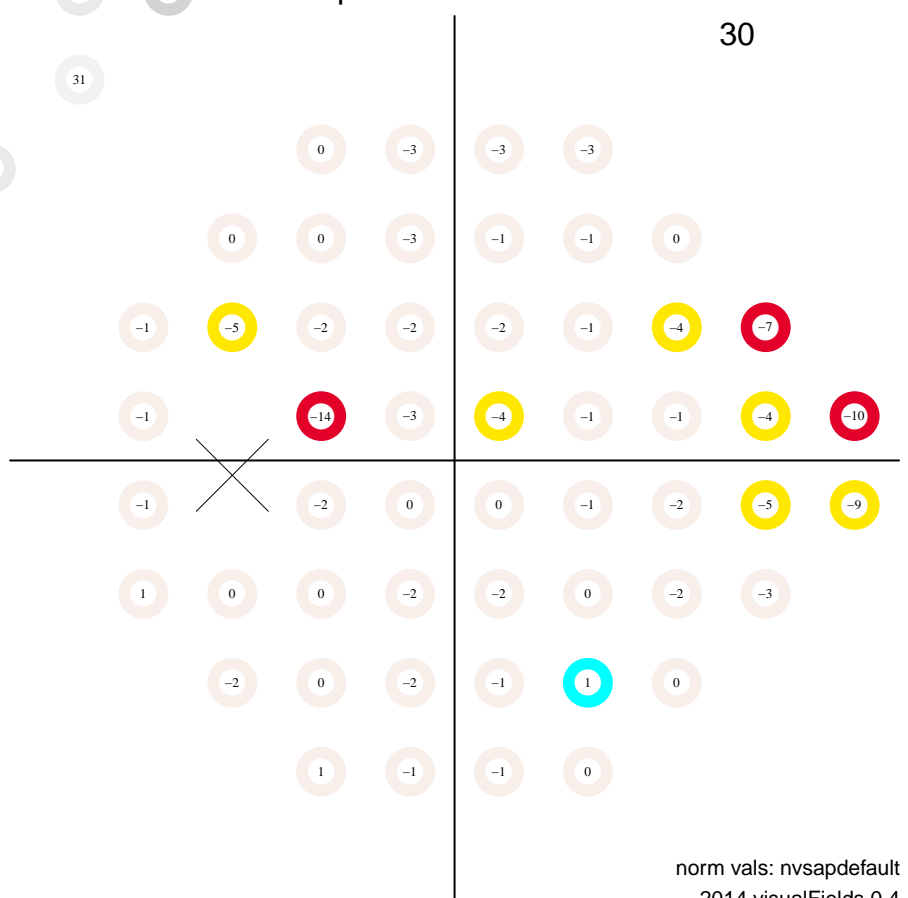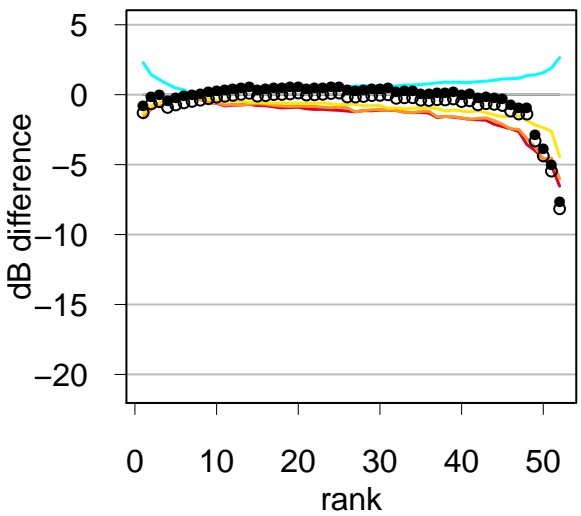

# Static Automated Perimetry. Single field analysis

Subject ID: 1004, age: 62, eye: OS (left)

Date: 06/05/2012 at 6:57:

Duration: 04:30, pause: 00:00

false positives 0.0 %

false negatives 0.0 %

fixation losses 0.0 %

MS 29.8 dB

MD -0.5 dB (p < 95 %)

PSD 3.4 dB (p < 95 %)

VFI 95.7 % (p < 0.5 %)

GH 2.5 dB

total deviation

Central 24-2  
SITA standard

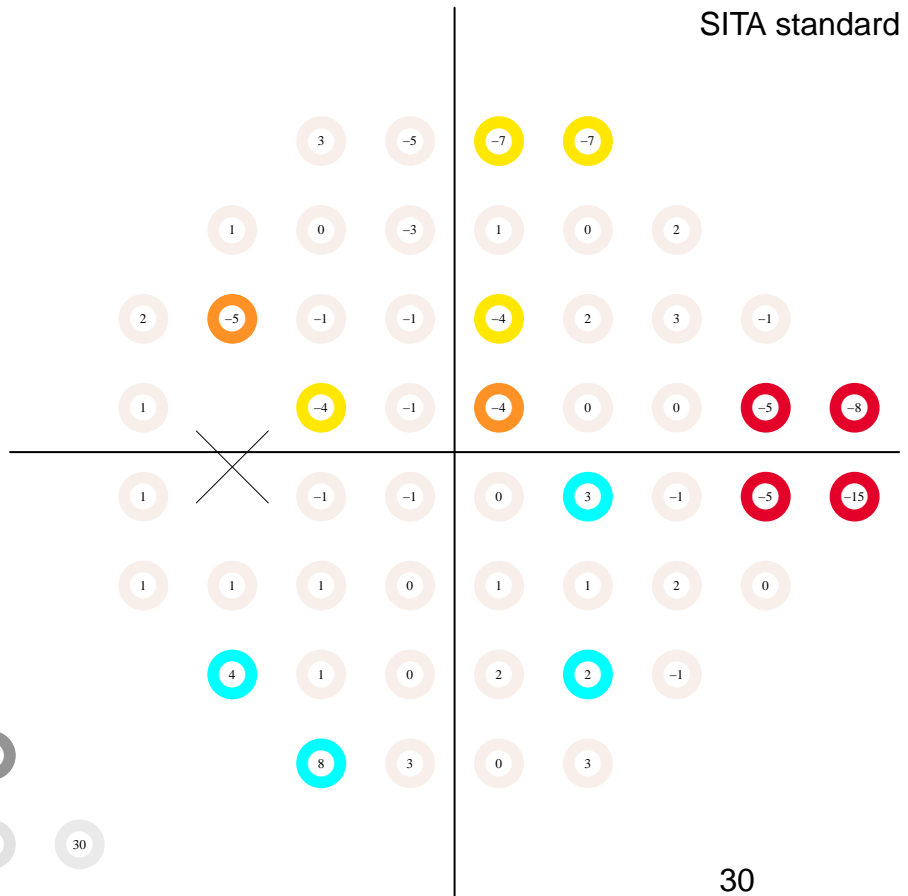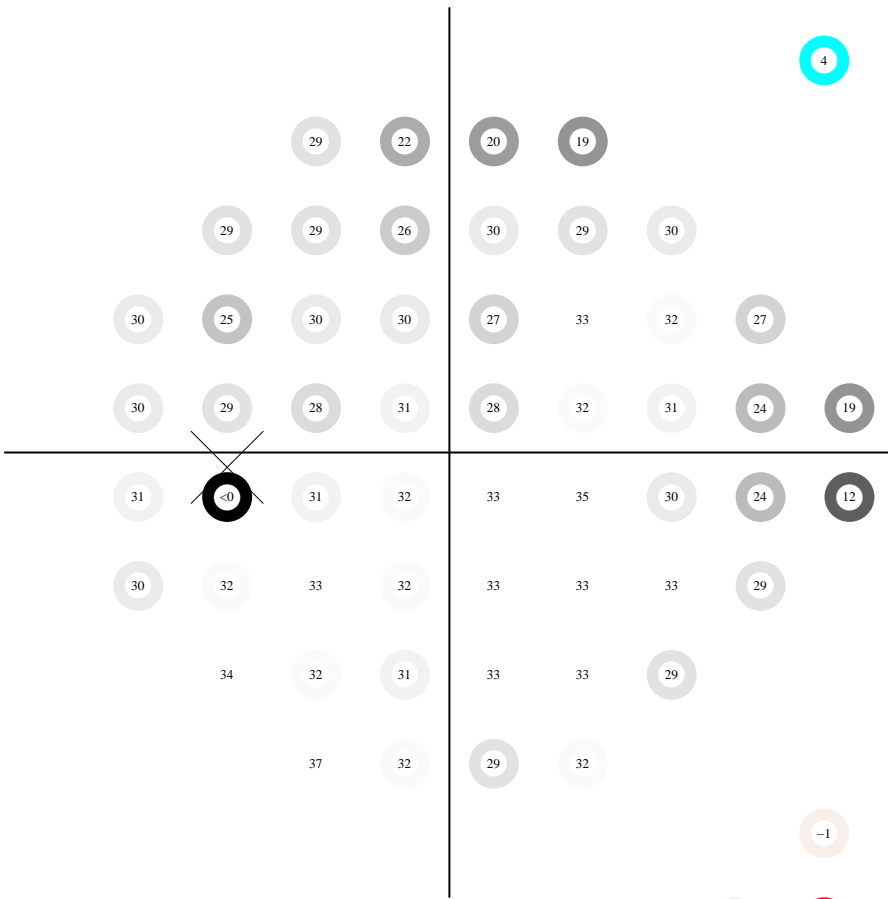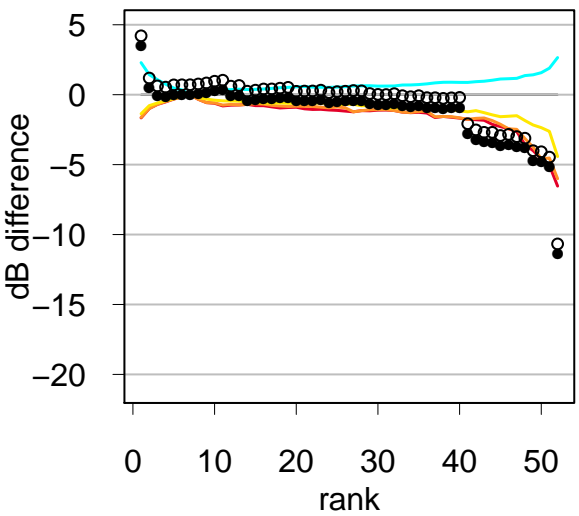

pattern deviation

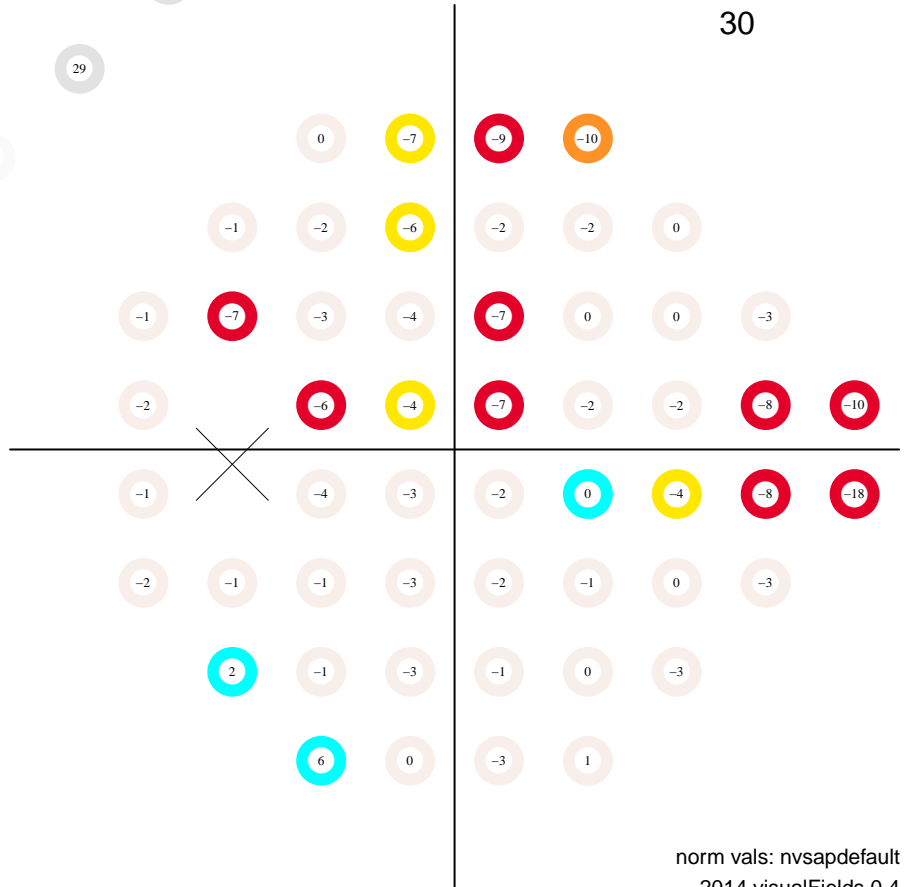

# Static Automated Perimetry. Single field analysis

Subject ID: 1004, age: 63, eye: OS (left)

Date: 09/11/2012 at 7:18:

Duration: 04:37, pause: 00:00

false positives 0.0 %

false negatives 2.0 %

fixation losses 0.0 %

MS 28.1 dB

MD -2.0 dB (p < 95 %)

PSD 2.2 dB (p < 95 %)

VFI 96.5 % (p < 1 %)

GH 0.4 dB

total deviation

Central 24-2  
SITA standard

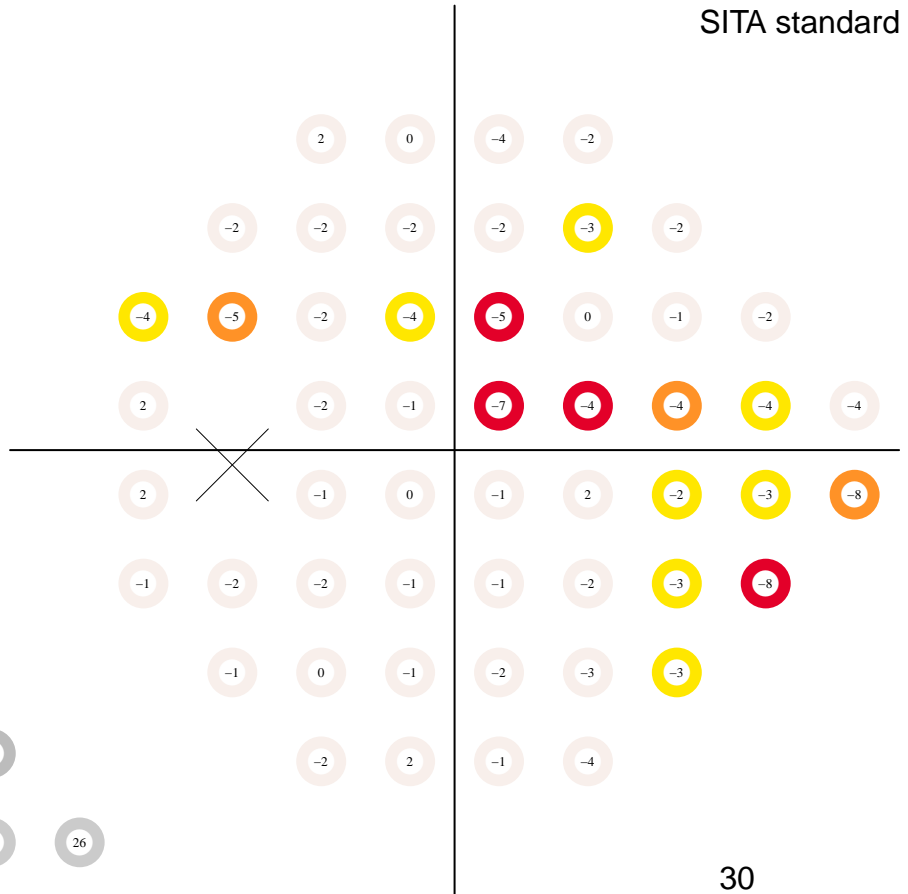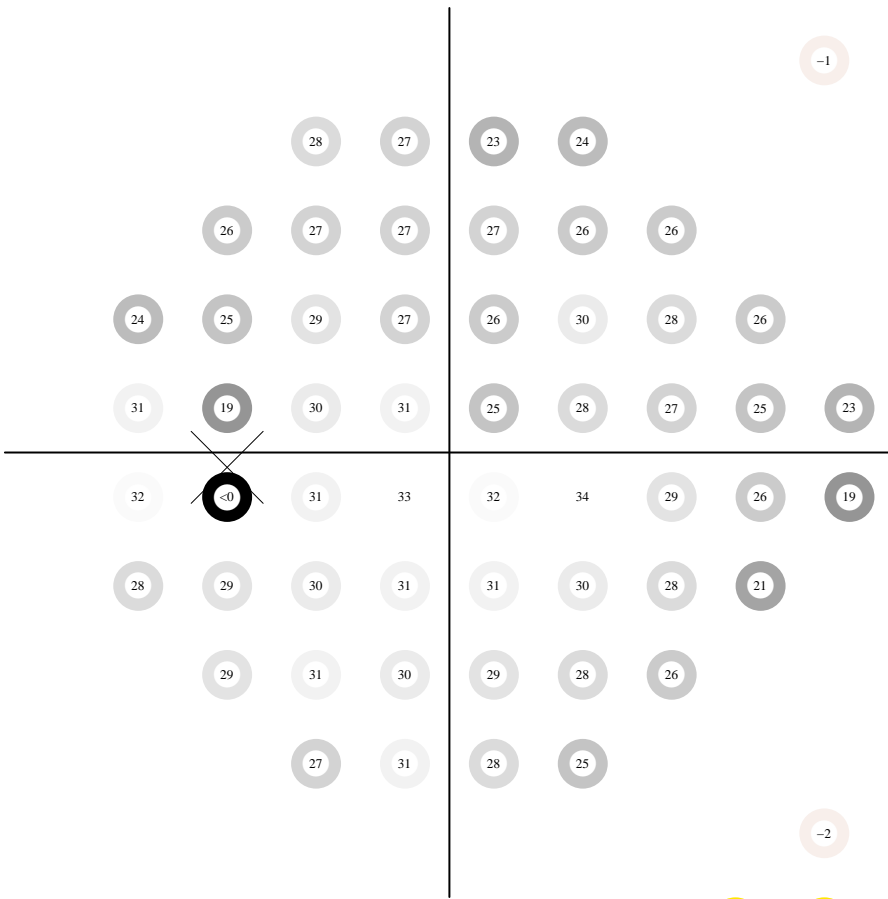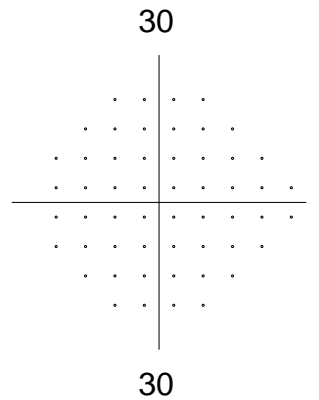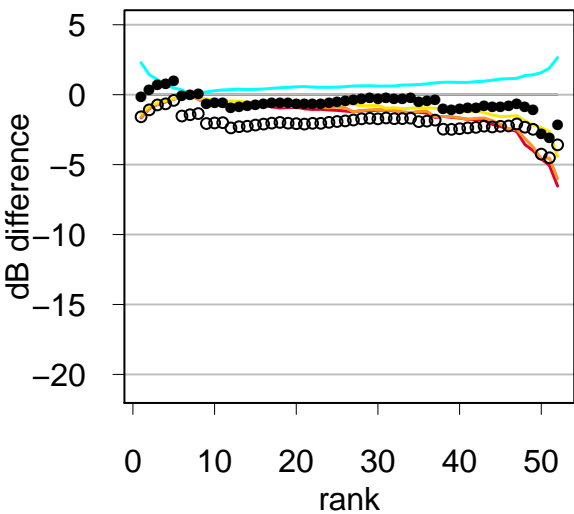

pattern deviation

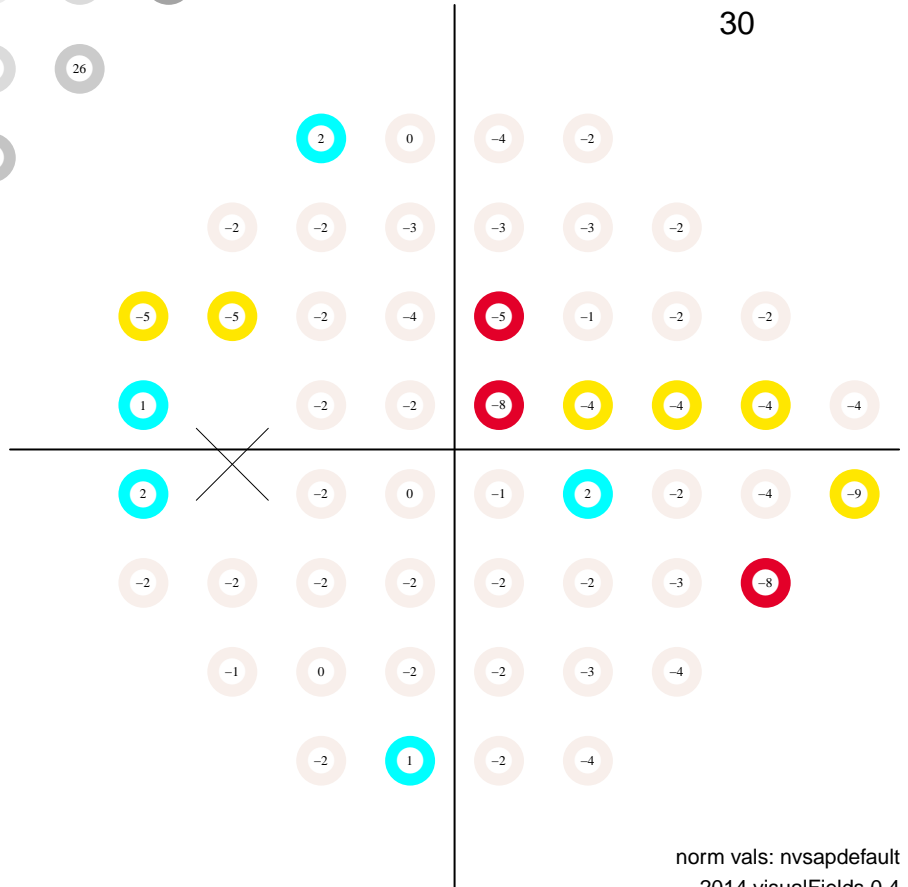



# Static Automated Perimetry. Single field analysis

Subject ID: 1004, age: 63, eye: OS (left)

Date: 12/11/2012 at 7:52:

Duration: 04:50, pause: 00:00

false positives 0.0 %

false negatives 0.0 %

fixation losses 0.0 %

MS 28.7 dB

MD -1.5 dB (p < 95 %)

PSD 2.8 dB (p < 95 %)

VFI 96.3 % (p < 1 %)

GH 1.4 dB

total deviation

Central 24-2  
SITA standard

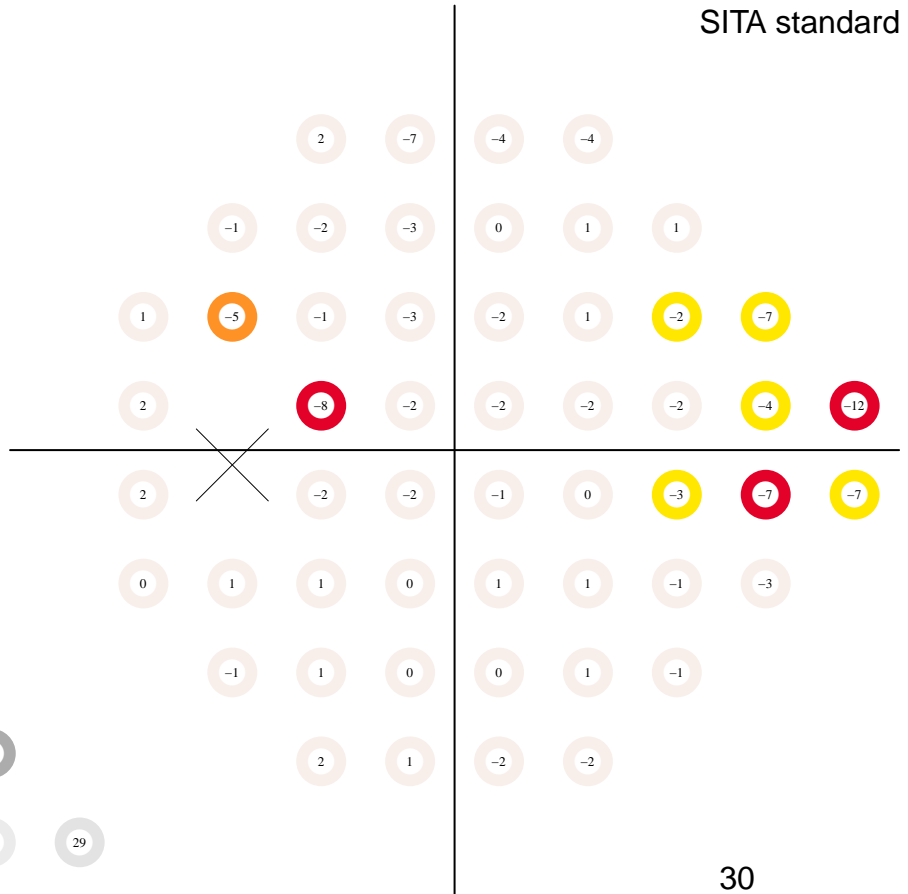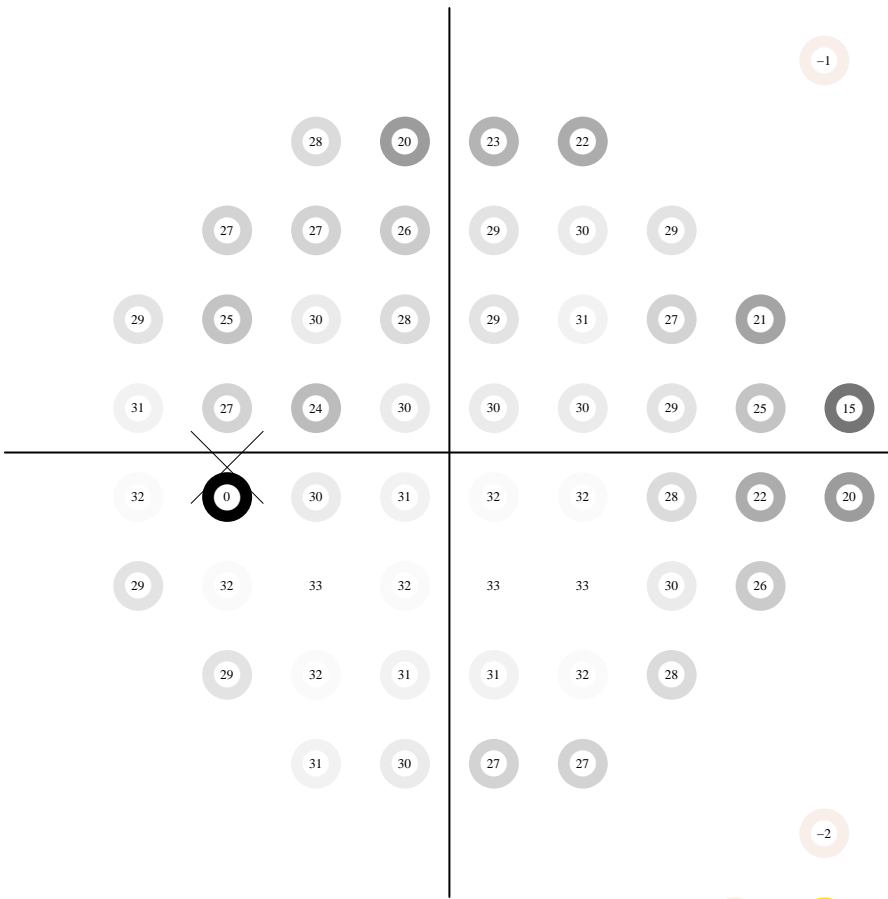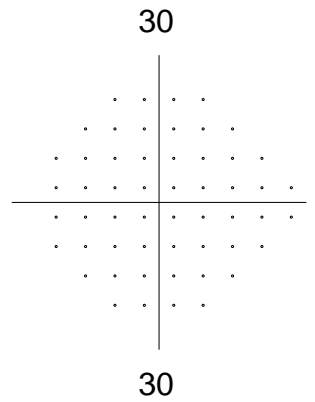

pattern deviation

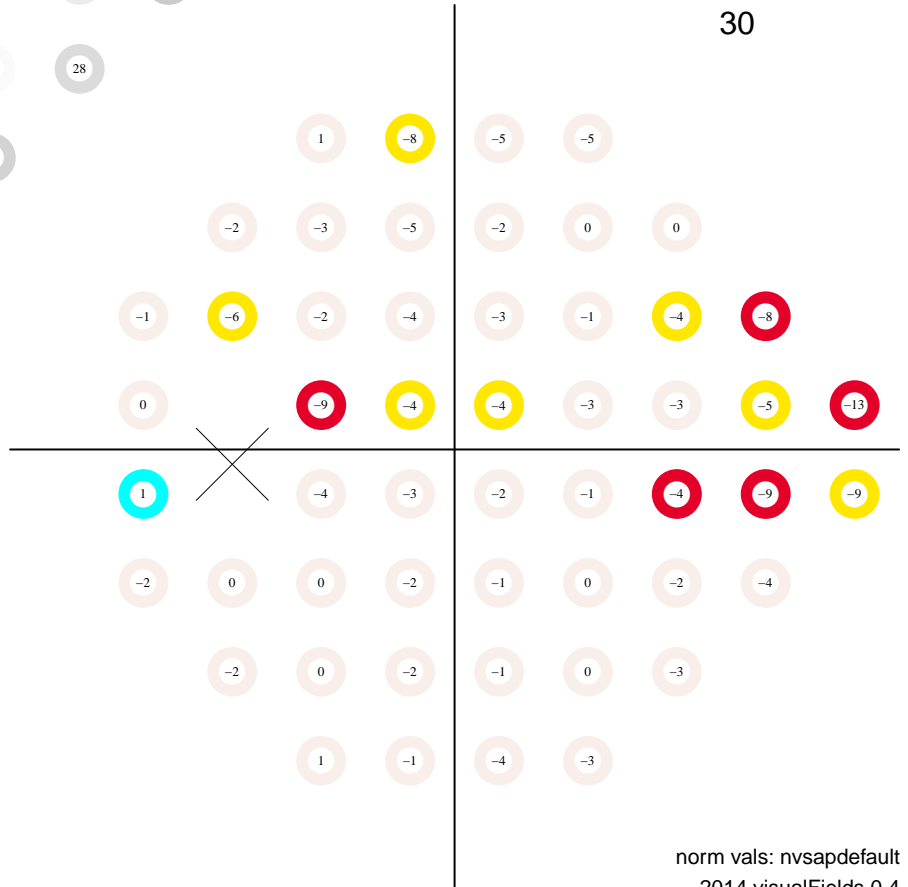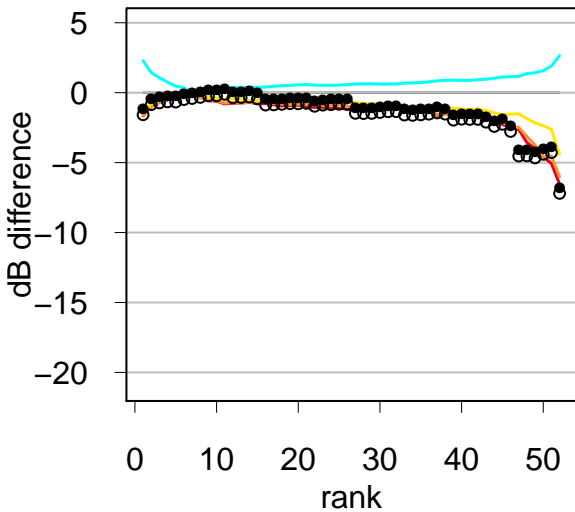

# Static Automated Perimetry. Single field analysis

Subject ID: 1004, age: 63, eye: OS (left)

Date: 03/12/2013 at 9:40:

Duration: 05:14, pause: 00:00

false positives 0.0 %

false negatives 0.0 %

fixation losses 0.0 %

MS 29.0 dB

MD -1.2 dB (p < 95 %)

PSD 3.0 dB (p < 95 %)

VFI 95.5 % (p < 0.5 %)

GH 2.2 dB

total deviation

Central 24-2  
SITA standard

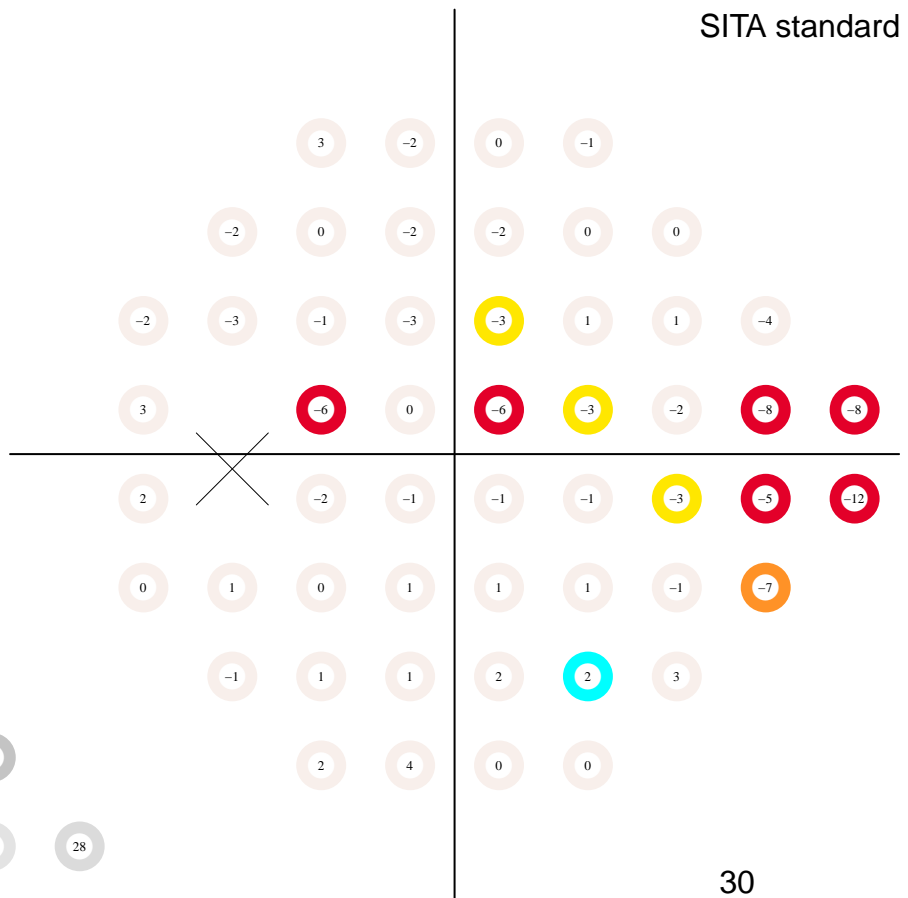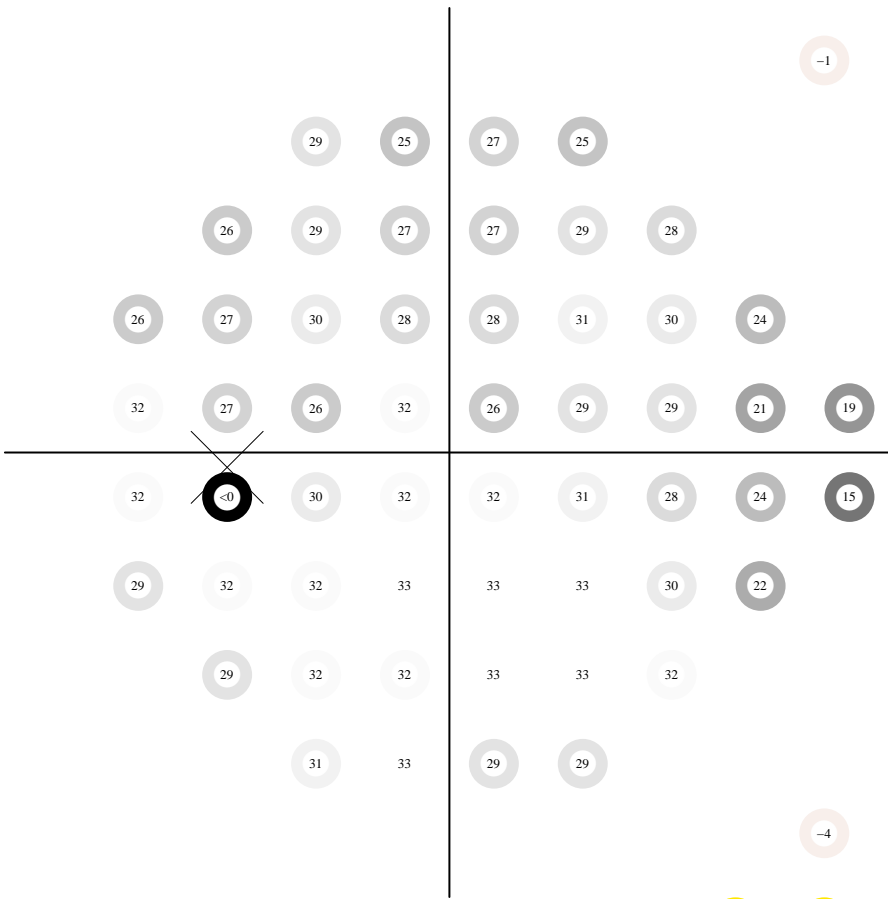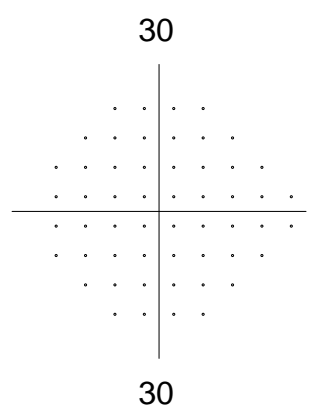

pattern deviation

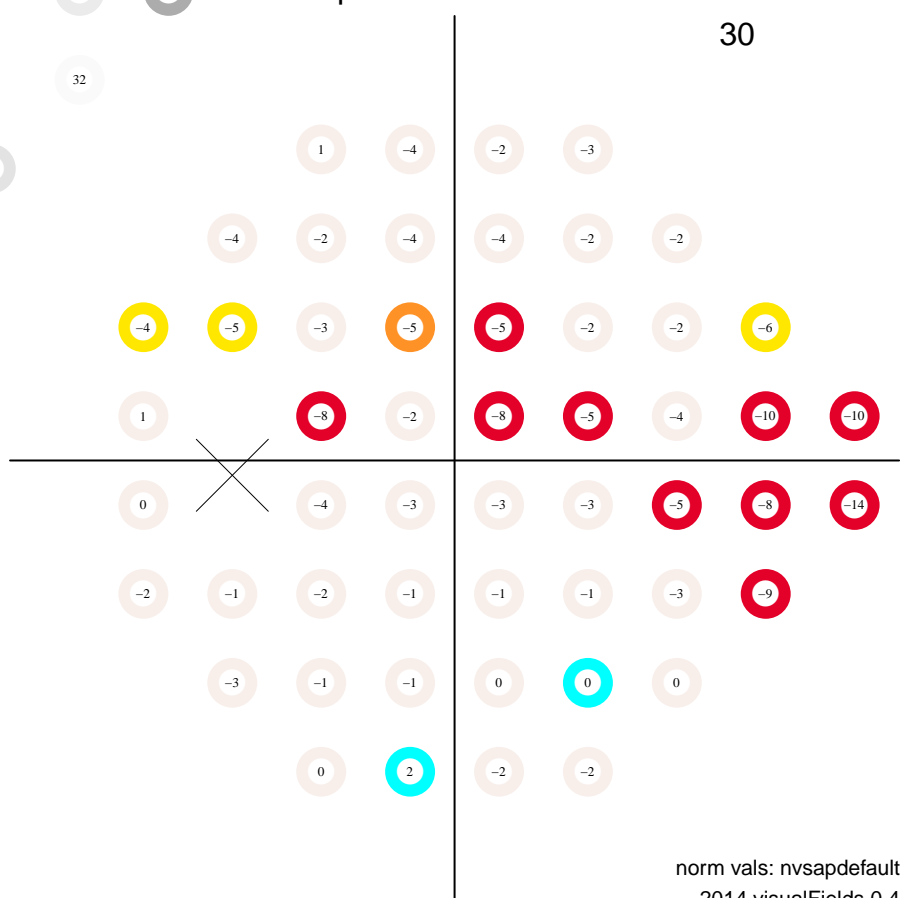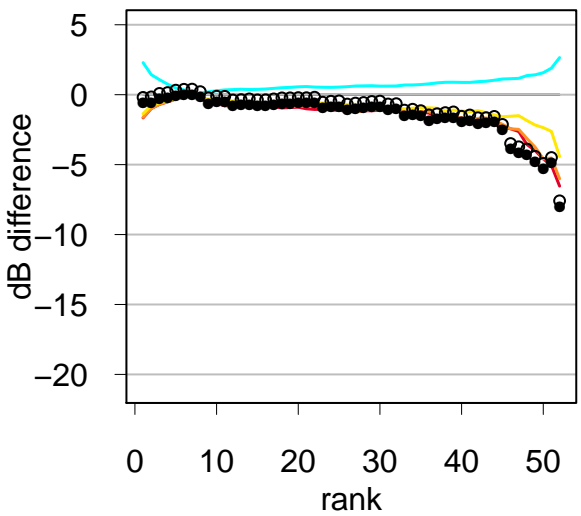

# Static Automated Perimetry. Single field analysis

Subject ID: 1015, age: 60, eye: OD (right)

Date: 07/11/2005 at 12:28

Duration: 04:57, pause: 00:00

false positives 0.0 %

false negatives 6.0 %

fixation losses 0.0 %

MS 30.1 dB

MD -0.2 dB (p < 95 %)

PSD 1.9 dB (p < 95 %)

VFI 99.0 % (p < 95 %)

GH 2.3 dB

total deviation

Central 24-2  
SITA standard

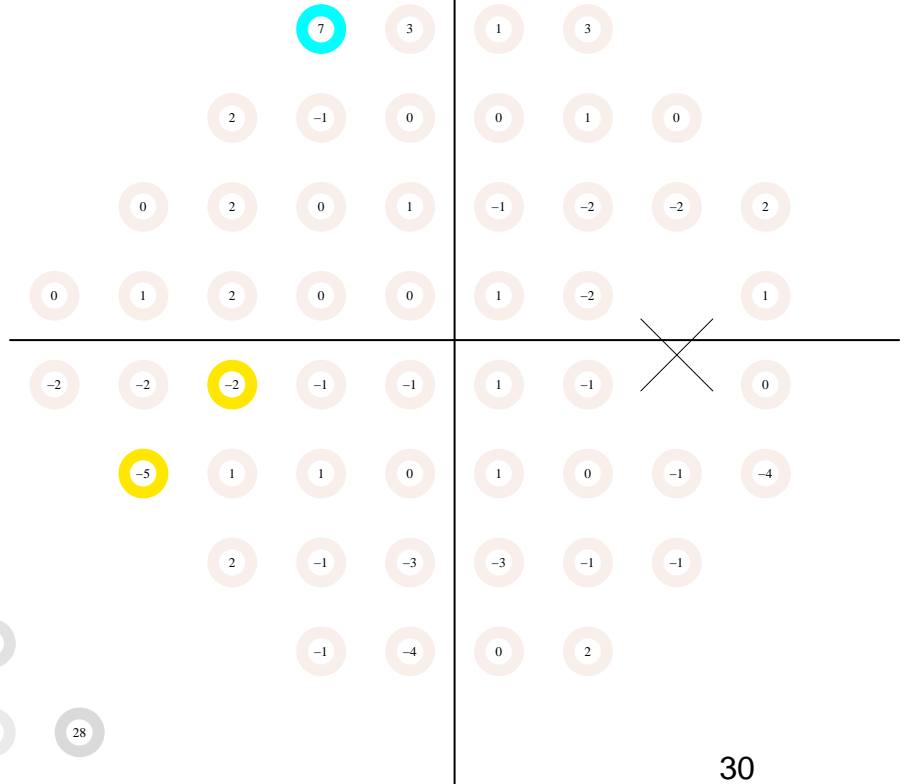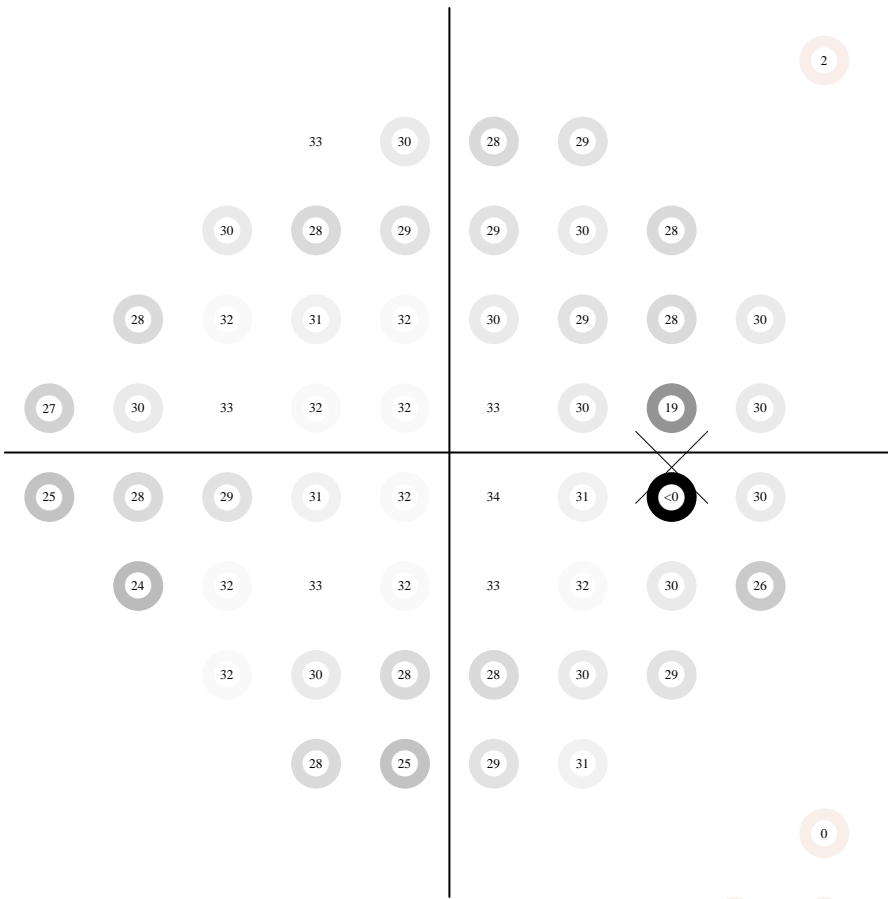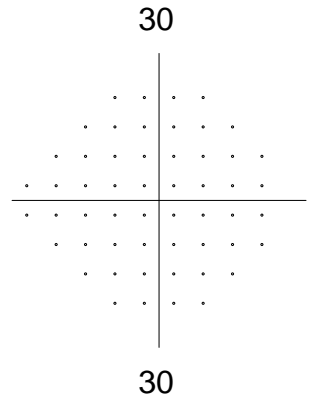

pattern deviation

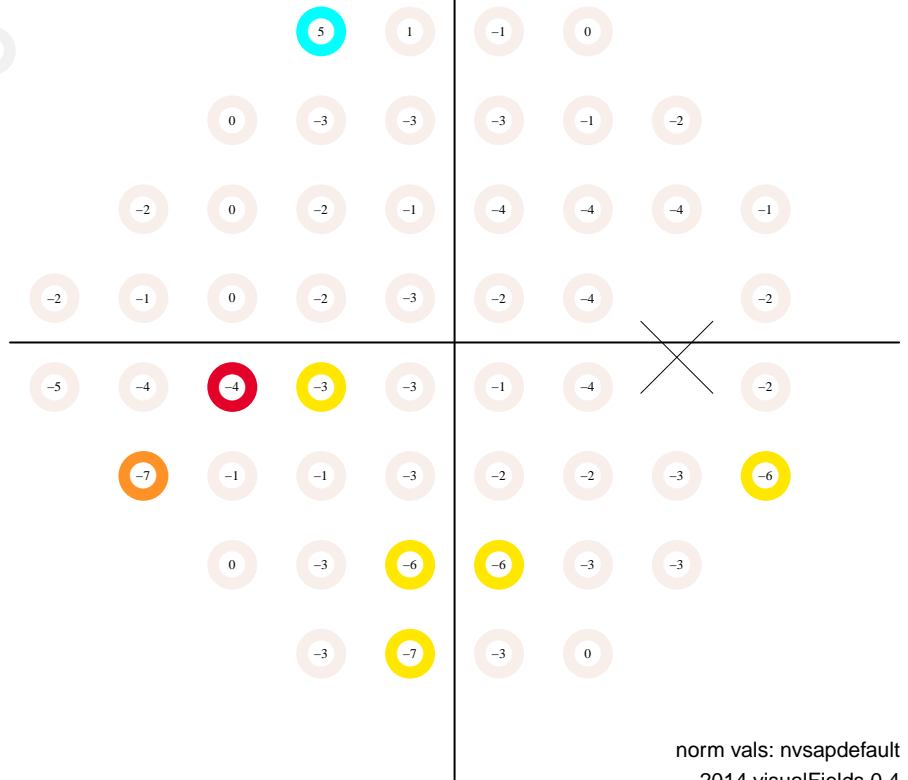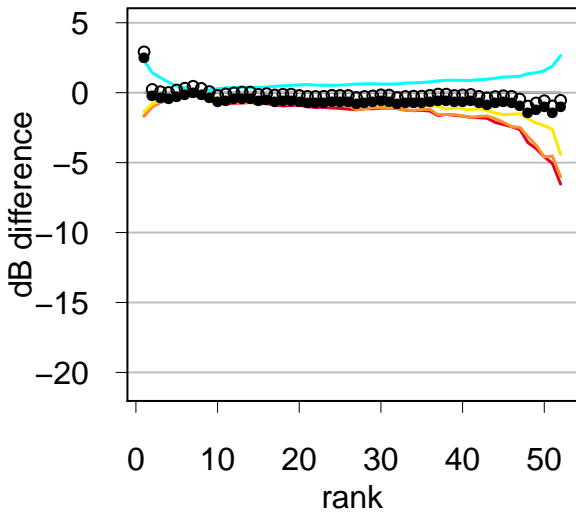

# Static Automated Perimetry. Single field analysis

Subject ID: 1015, age: 60, eye: OD (right)

Date: 10/17/2005 at 14:03

Duration: 04:44, pause: 00:00

false positives 0.0 %

false negatives 8.0 %

fixation losses 7.7 %

MS 29.4 dB

MD -0.9 dB (p < 95 %)

PSD 5.4 dB (p < 95 %)

VFI 92.6 % (p < 0.5 %)

GH 2.3 dB

total deviation

Central 24-2  
SITA standard

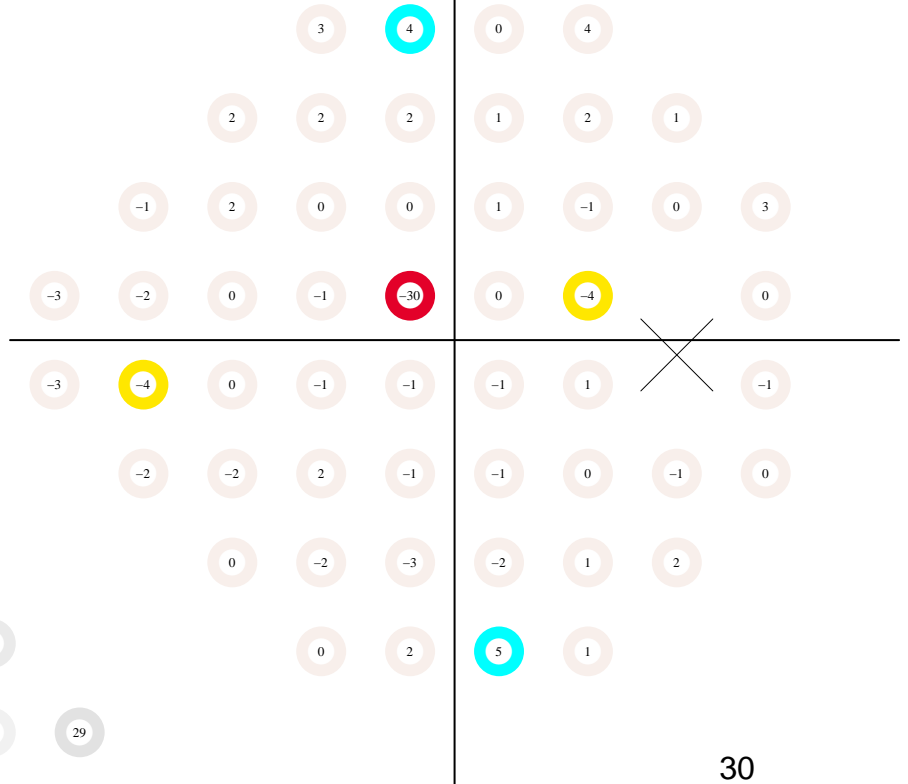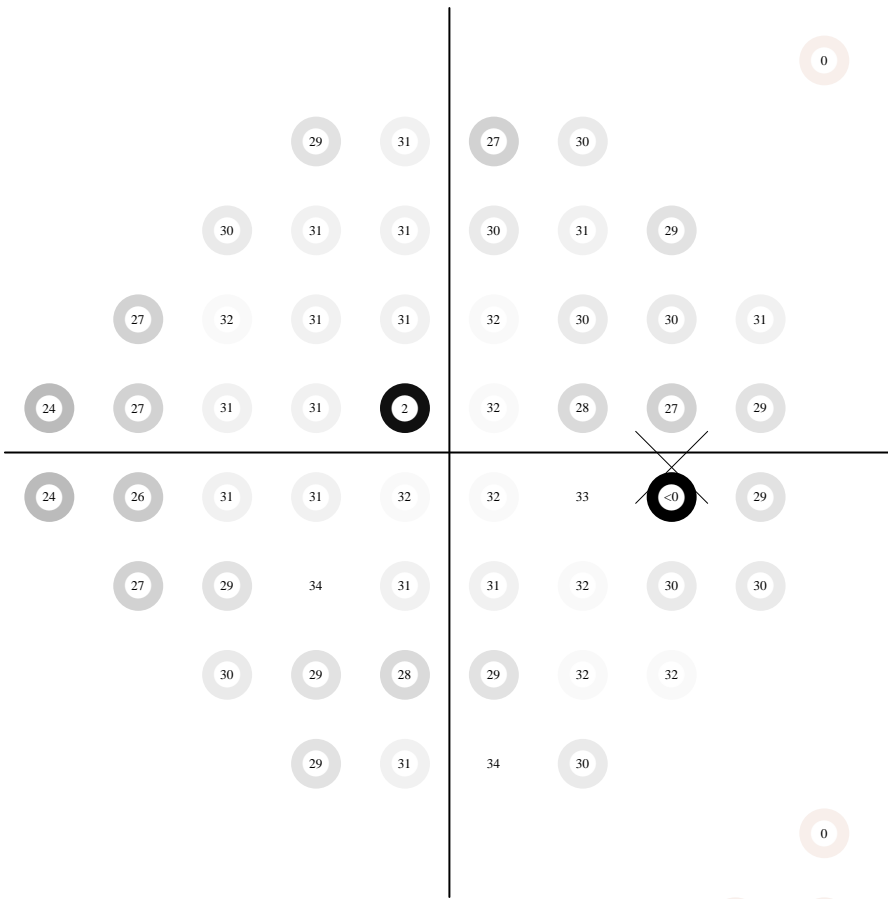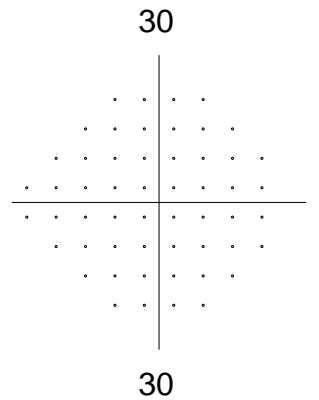

pattern deviation

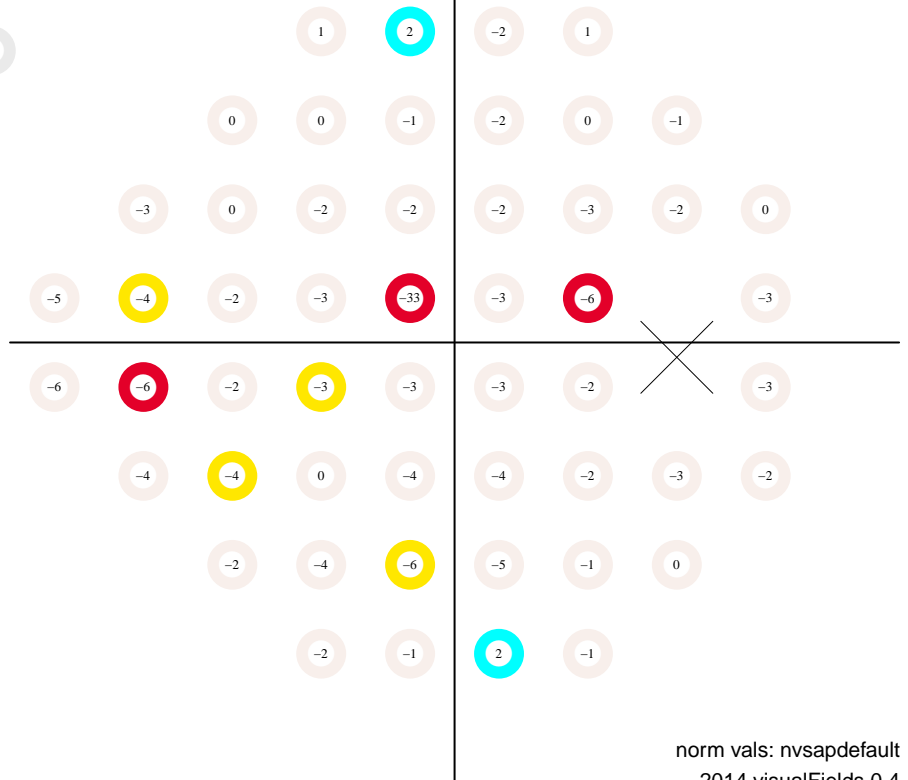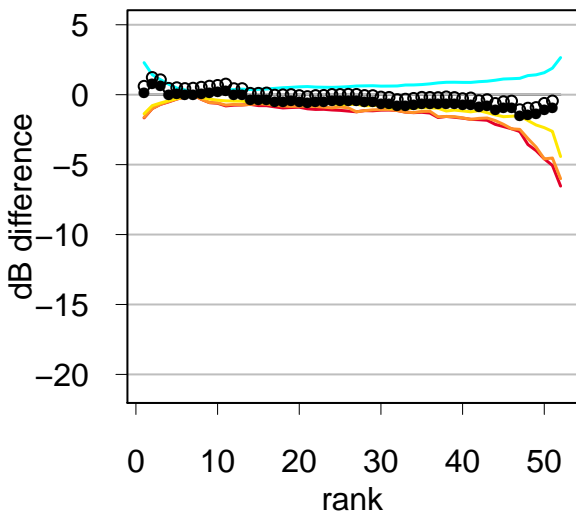

# Static Automated Perimetry. Single field analysis

Subject ID: 1015, age: 61, eye: OD (right)

Date: 04/17/2006 at 15:00

Duration: 05:01, pause: 00:00

false positives 3.0 %

false negatives 2.0 %

fixation losses 0.0 %

MS 28.7 dB

MD -1.6 dB (p < 95 %)

PSD 5.6 dB (p < 95 %)

VFI 91.9 % (p < 0.5 %)

GH 1.4 dB

total deviation

Central 24-2  
SITA standard

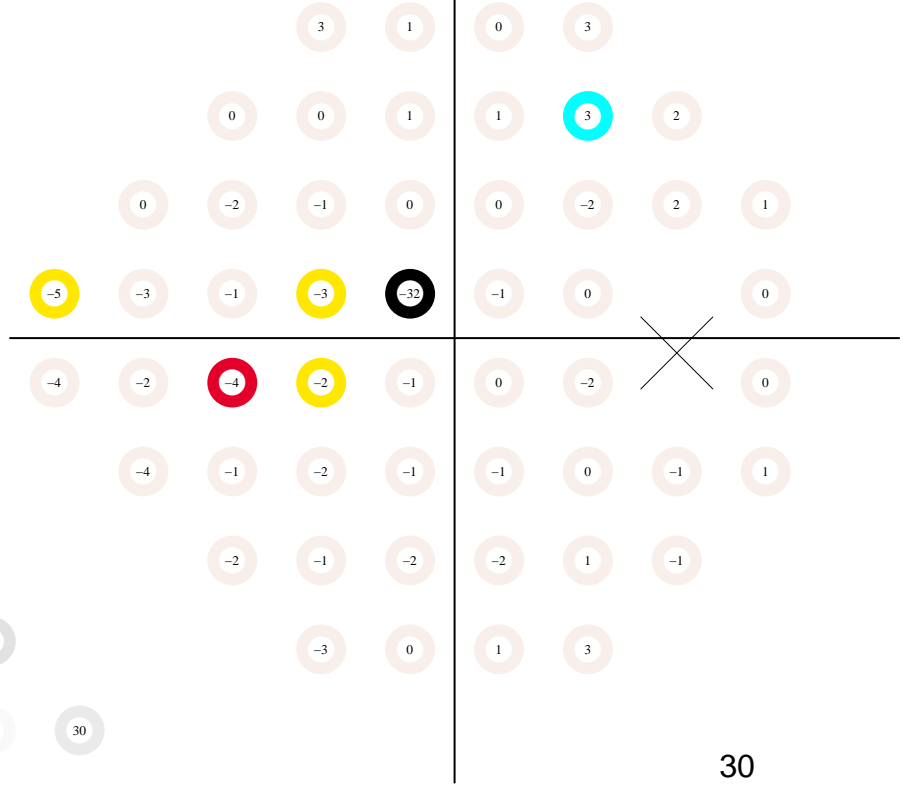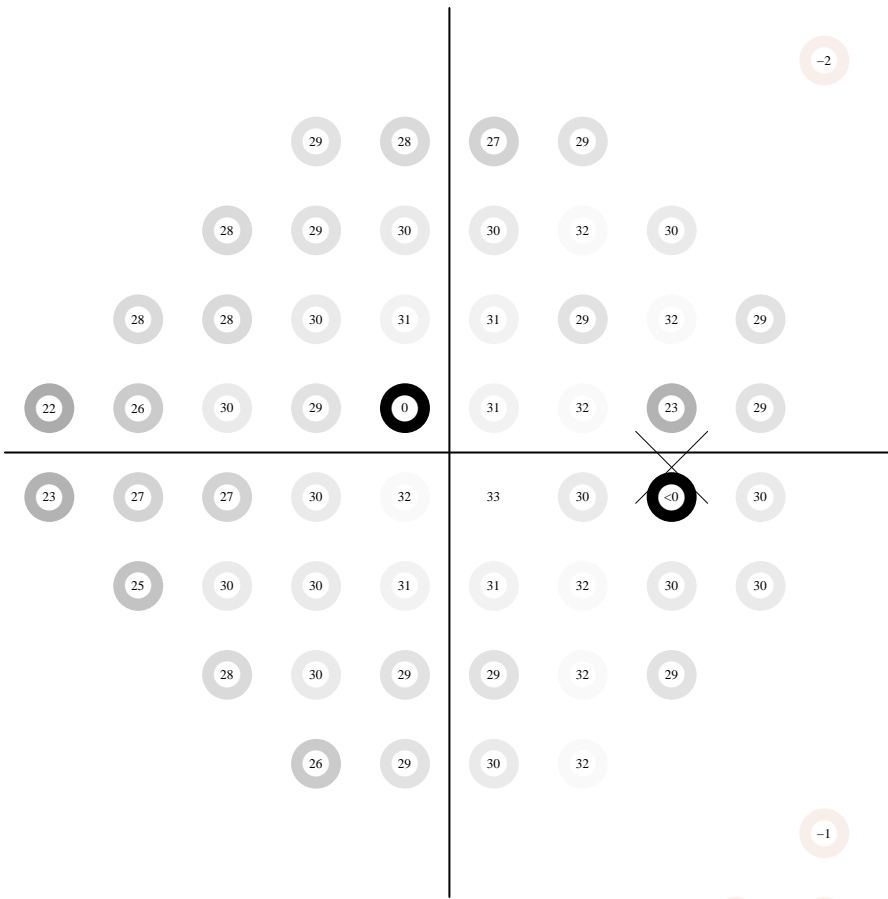

pattern deviation

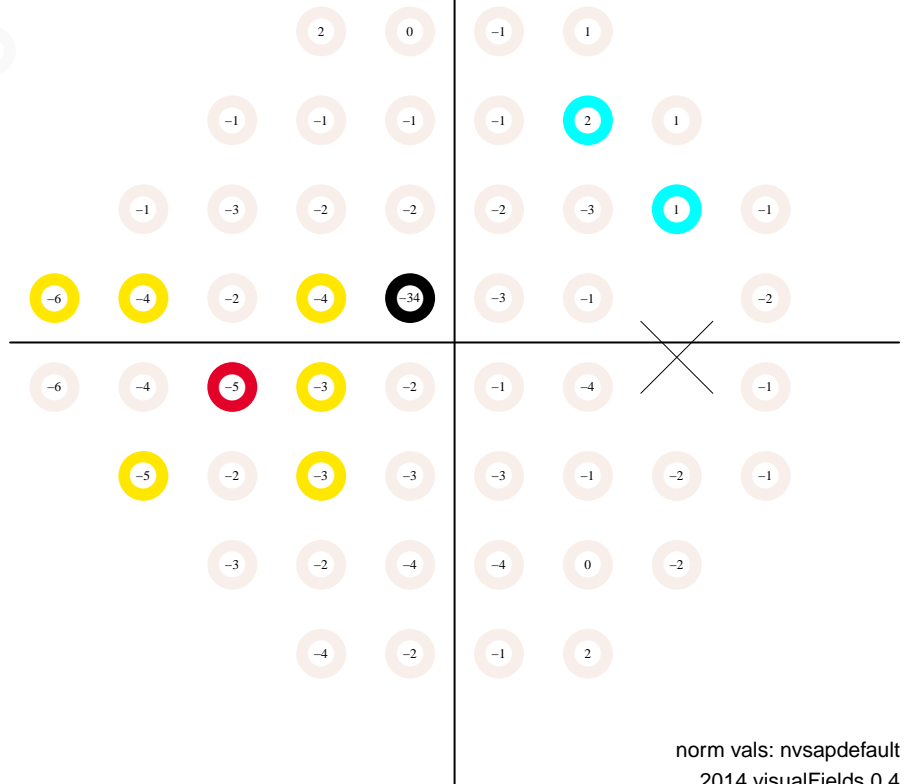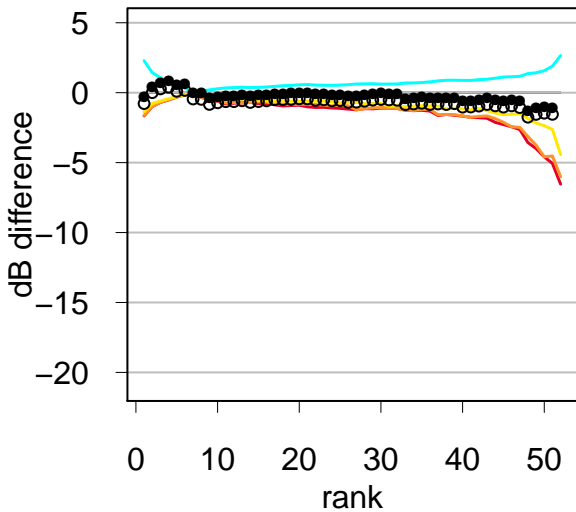

# Static Automated Perimetry. Single field analysis

Subject ID: 1015, age: 61, eye: OD (right)

Date: 12/15/2006 at 9:58:

Duration: 05:00, pause: 00:00

false positives 0.0 %

false negatives 0.0 %

fixation losses 0.0 %

MS 29.2 dB

MD -1.1 dB (p < 95 %)

PSD 5.7 dB (p < 95 %)

VFI 92.5 % (p < 0.5 %)

GH 1.8 dB

total deviation

Central 24-2  
SITA standard

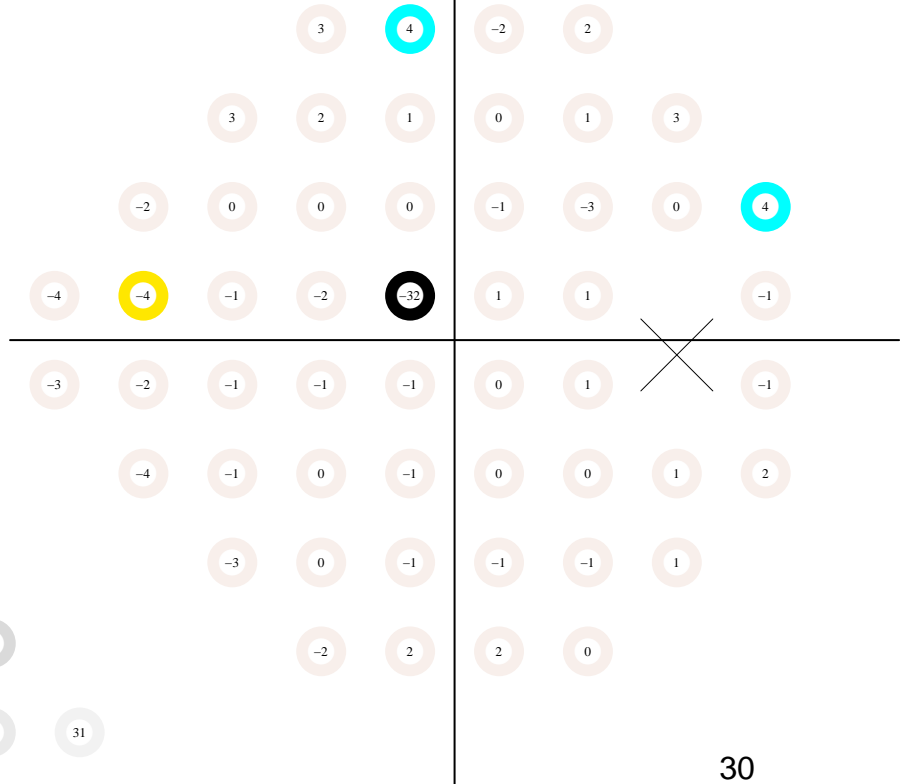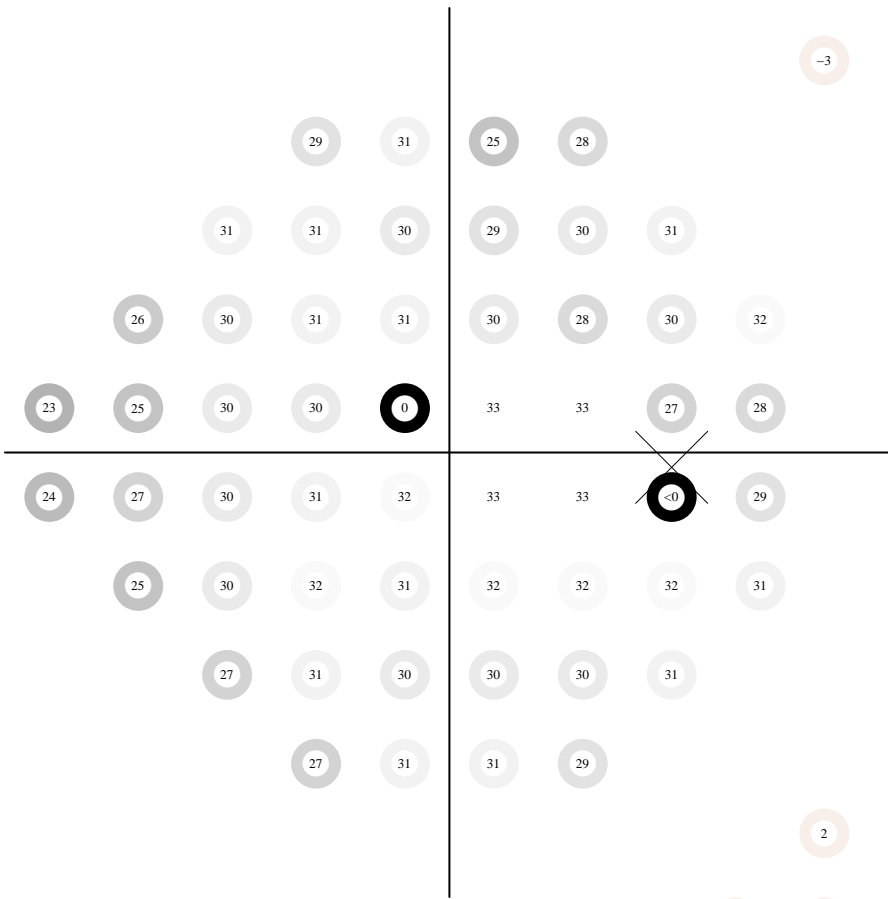

pattern deviation

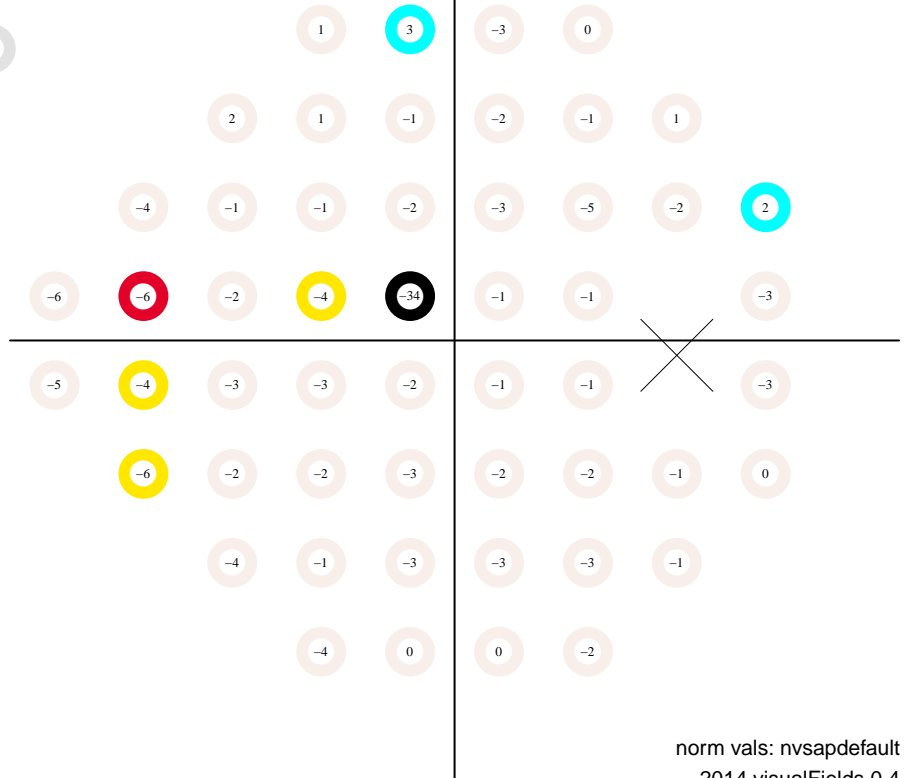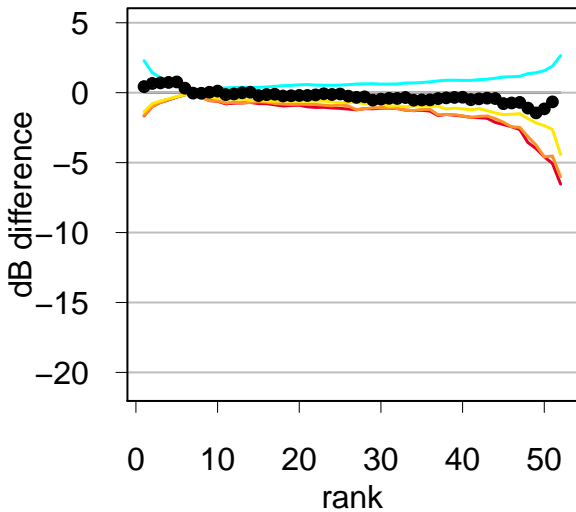

# Static Automated Perimetry. Single field analysis

Subject ID: 1015, age: 62, eye: OD (right)

Date: 02/20/2007 at 9:16:

Duration: 04:46, pause: 00:00

false positives 0.0 %

false negatives 1.0 %

fixation losses 0.0 %

MS 29.2 dB

MD -1.1 dB (p < 95 %)

PSD 5.7 dB (p < 95 %)

VFI 92.1 % (p < 0.5 %)

GH 2.4 dB

total deviation

Central 24-2  
SITA standard

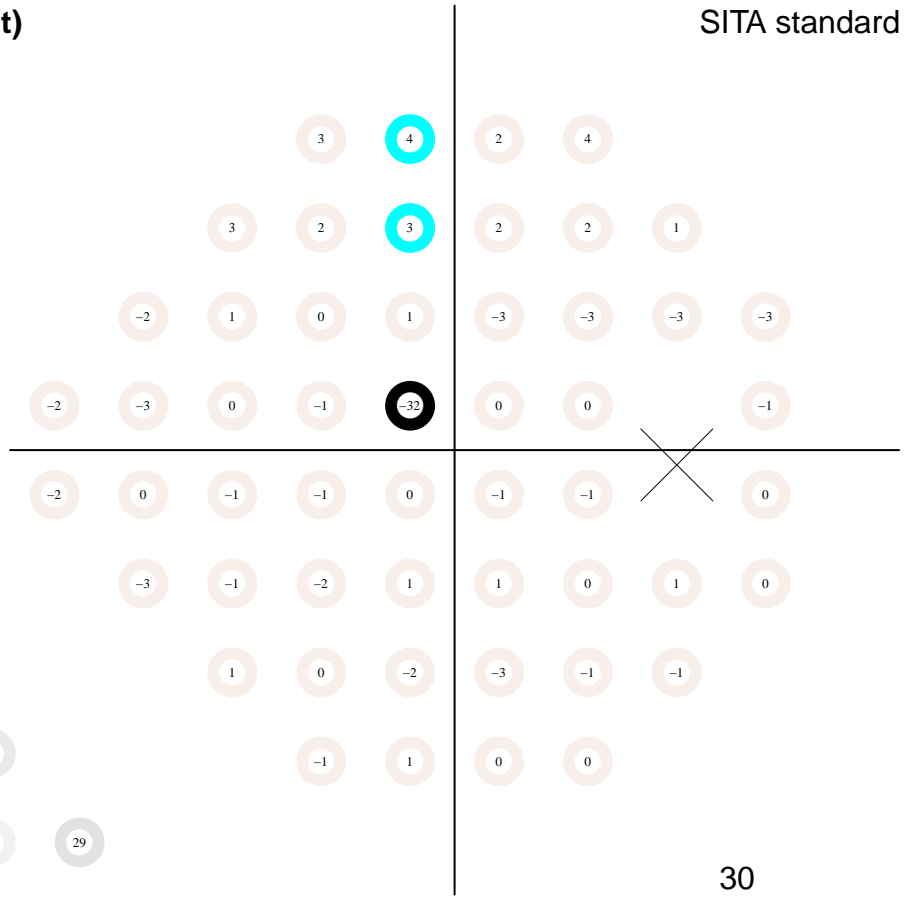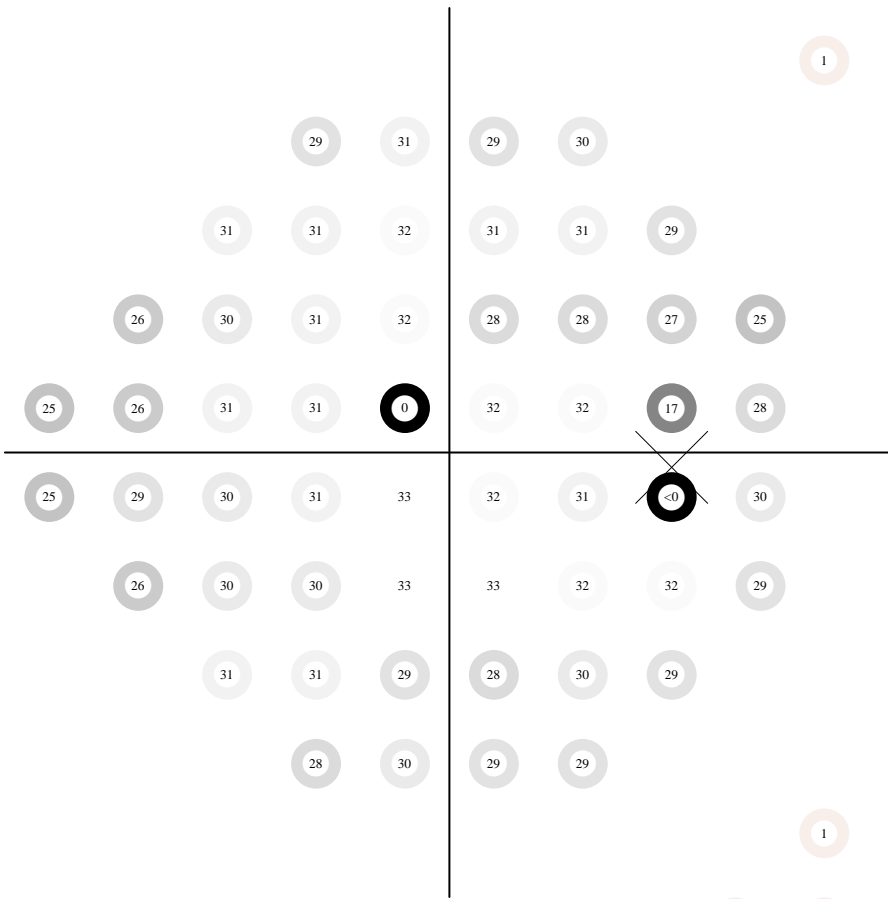

pattern deviation

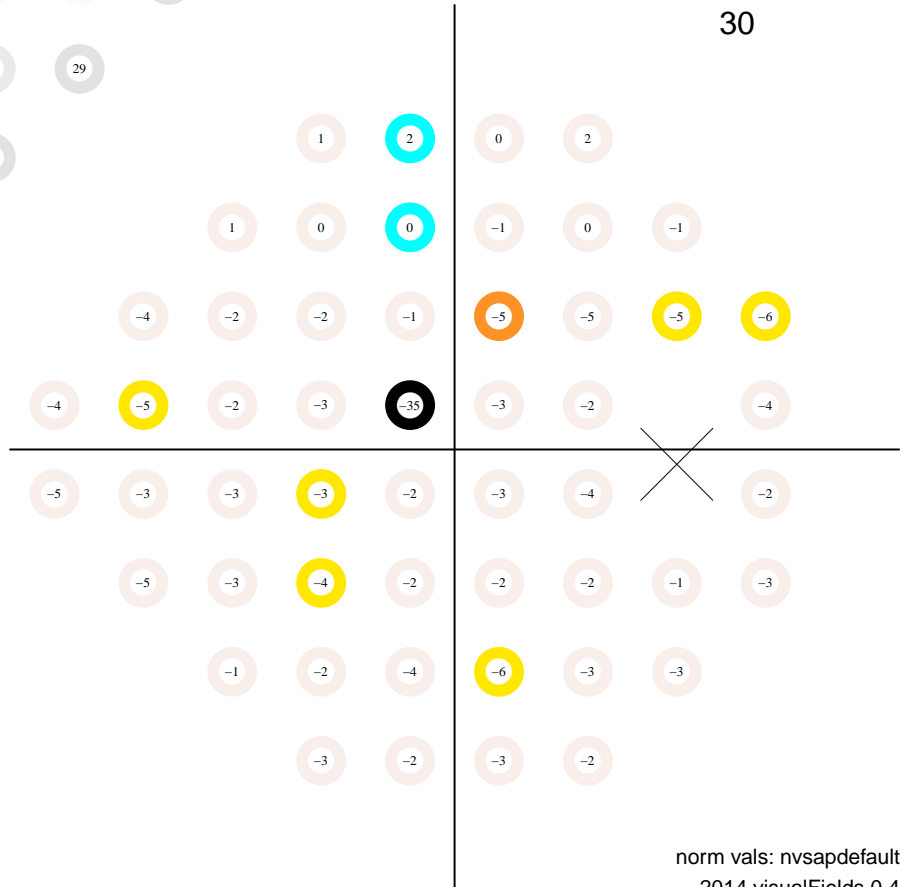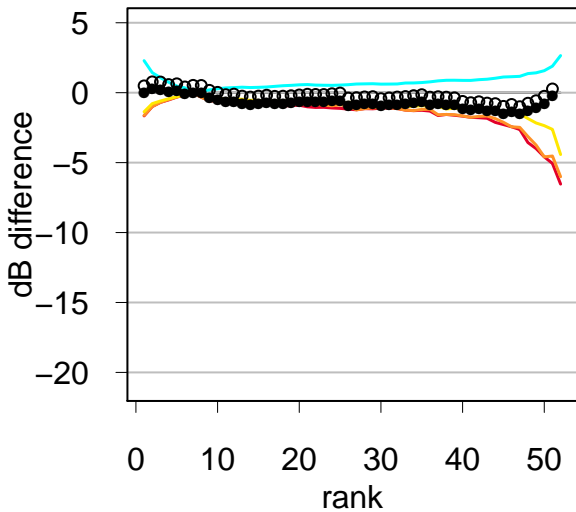





# Static Automated Perimetry. Single field analysis

Subject ID: 1015, age: 62, eye: OD (right)

Date: 10/09/2007 at 11:20

Duration: 04:36, pause: 00:00

false positives 0.0 %

false negatives 0.0 %

fixation losses 0.0 %

MS 29.4 dB

MD -0.8 dB (p < 95 %)

PSD 5.6 dB (p < 95 %)

VFI 92.5 % (p < 0.5 %)

GH 2.1 dB

total deviation

Central 24-2  
SITA standard

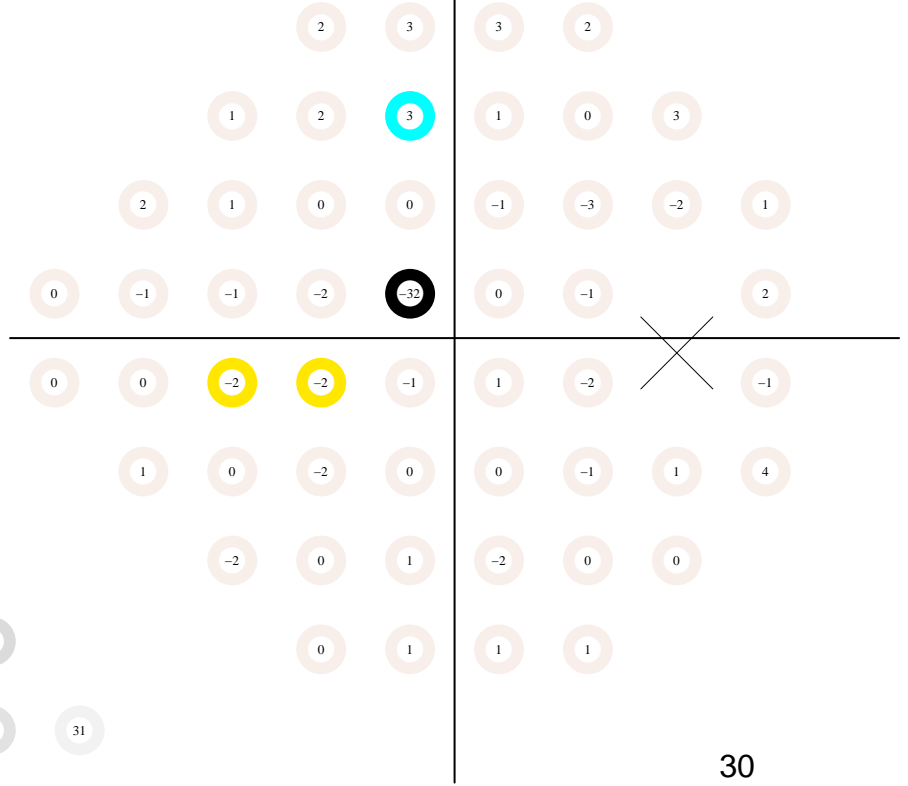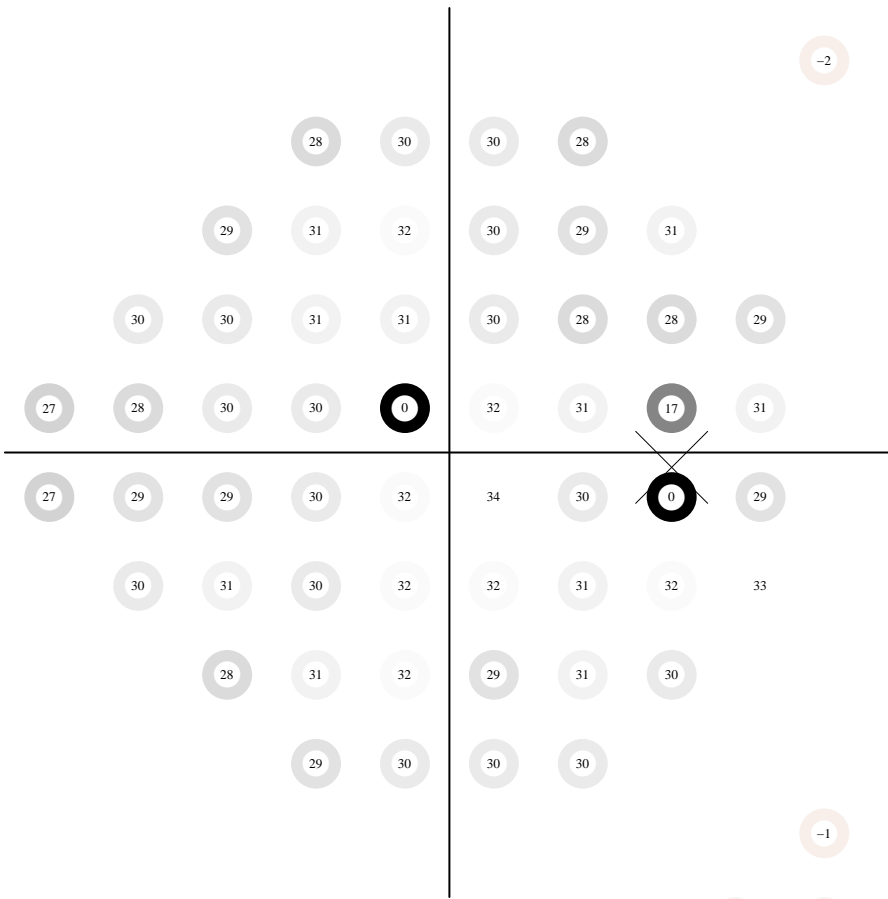

pattern deviation

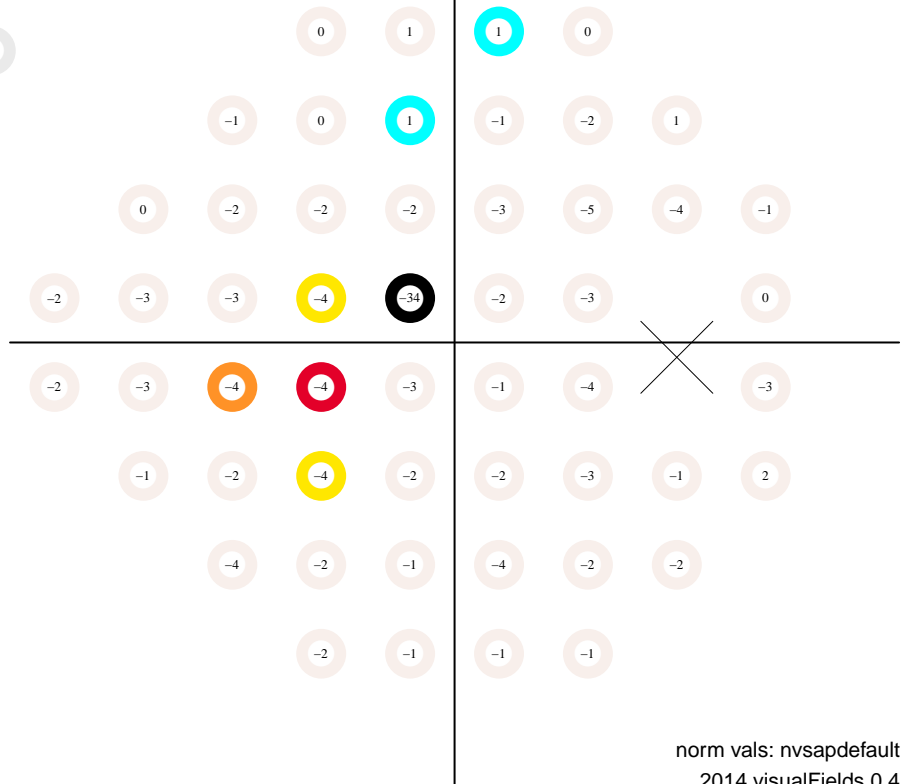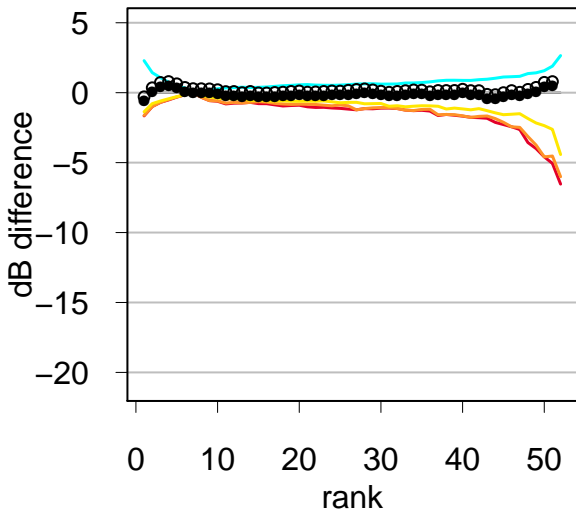

# Static Automated Perimetry. Single field analysis

Subject ID: 1015, age: 63, eye: OD (right)

Date: 04/15/2008 at 11:21

Duration: 04:40, pause: 00:00

false positives 1.0 %

false negatives 0.0 %

fixation losses 0.0 %

MS 29.2 dB

MD -1.0 dB (p < 95 %)

PSD 5.6 dB (p < 95 %)

VFI 92.6 % (p < 0.5 %)

GH 1.7 dB

total deviation

Central 24-2  
SITA standard

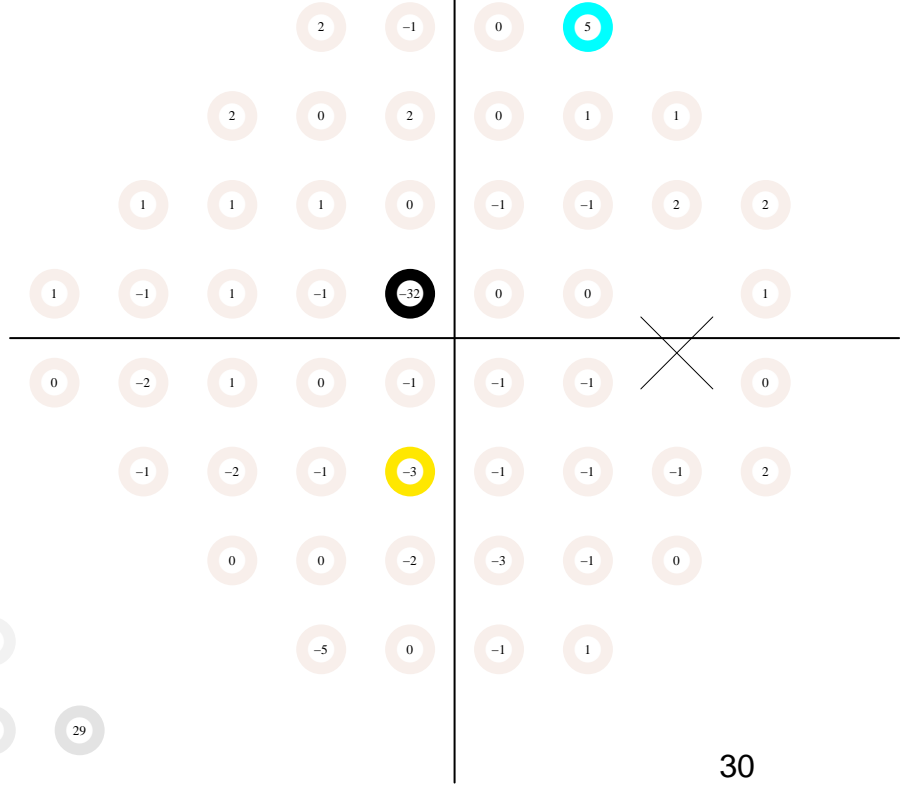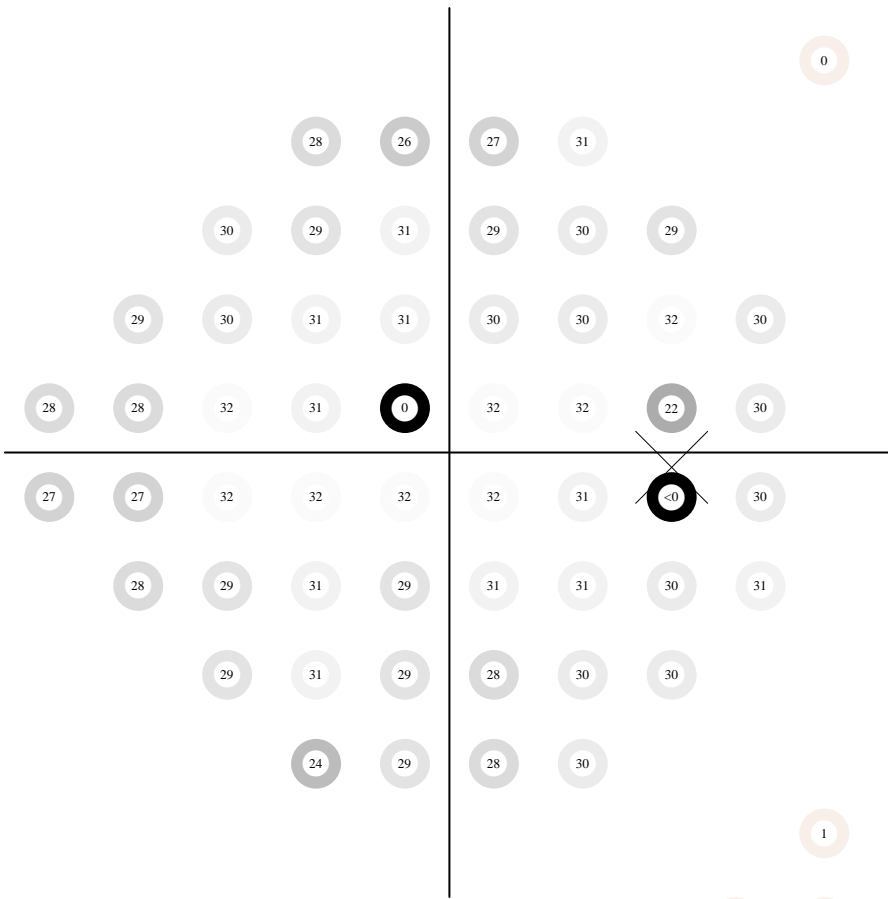

pattern deviation

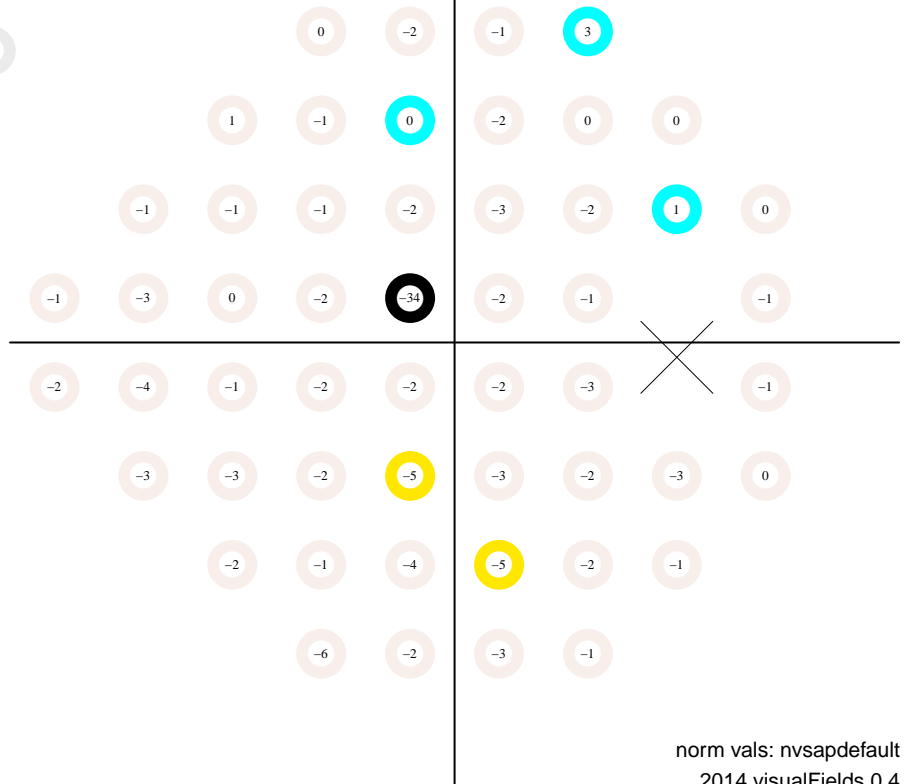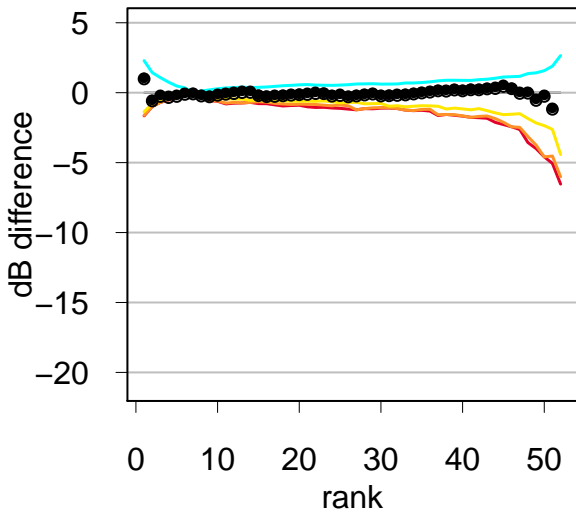

# Static Automated Perimetry. Single field analysis

Subject ID: 1015, age: 63, eye: OD (right)

Date: 06/11/2008 at 7:59:

Duration: 05:11, pause: 00:00

false positives 0.0 %

false negatives 10.0 %

fixation losses 0.0 %

MS 28.6 dB

MD -1.6 dB (p < 95 %)

PSD 5.3 dB (p < 95 %)

VFI 91.0 % (p < 0.5 %)

GH 2.3 dB

total deviation

Central 24-2  
SITA standard

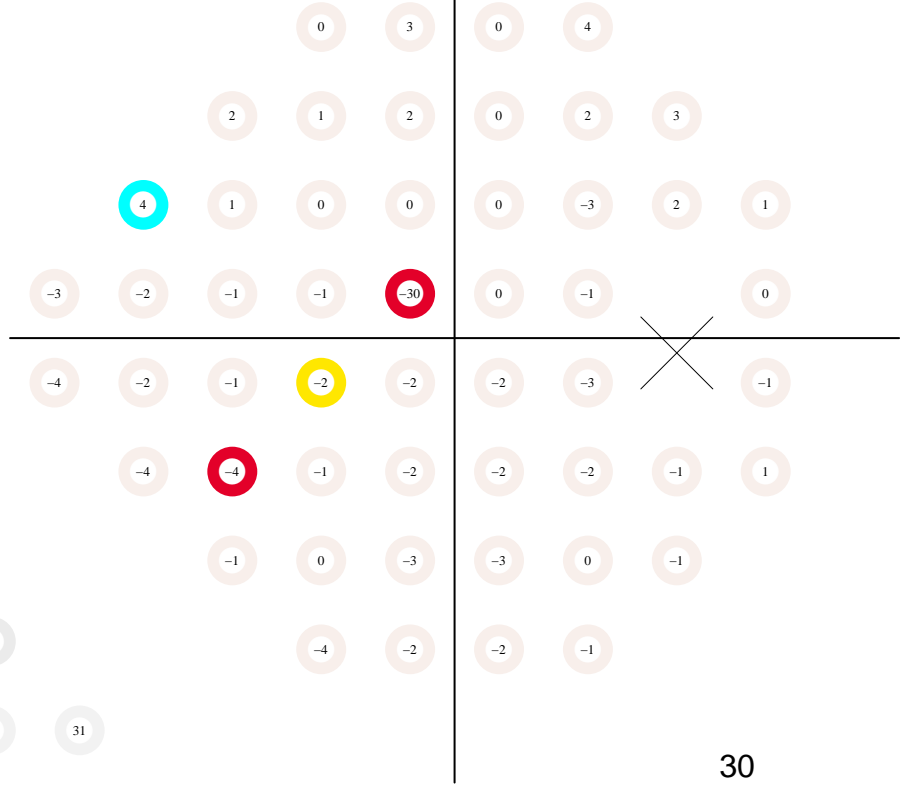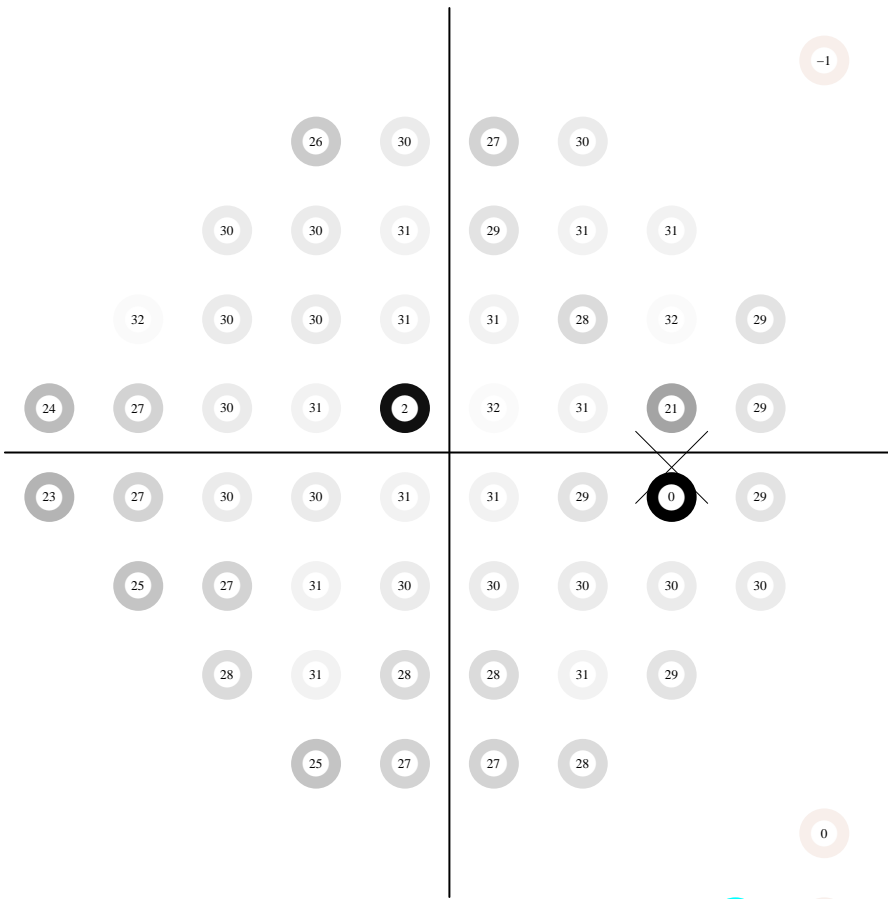

pattern deviation

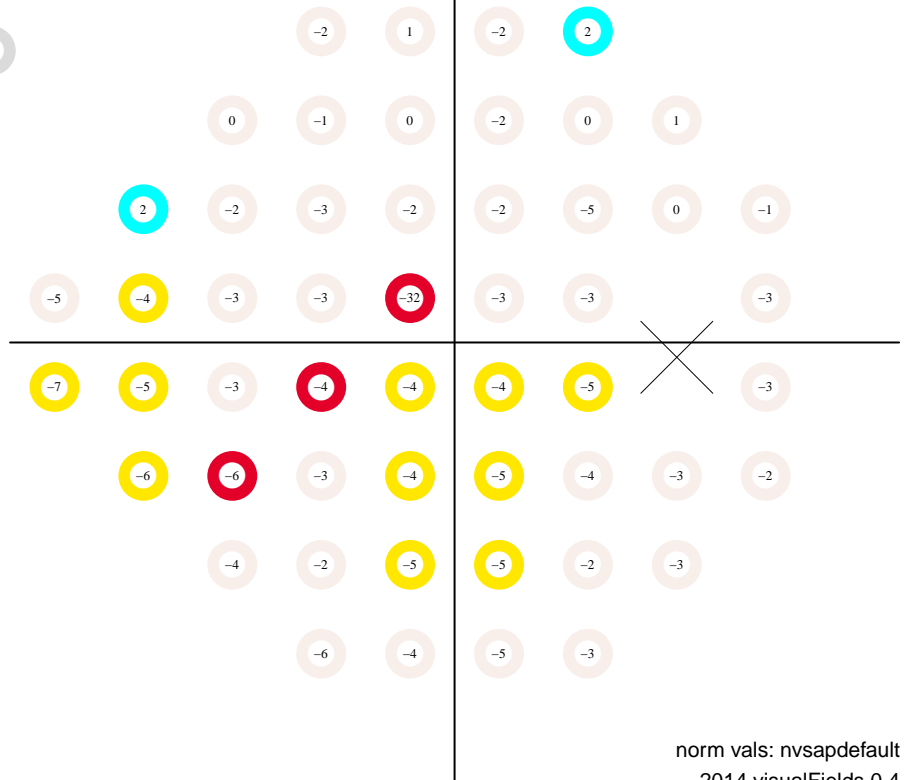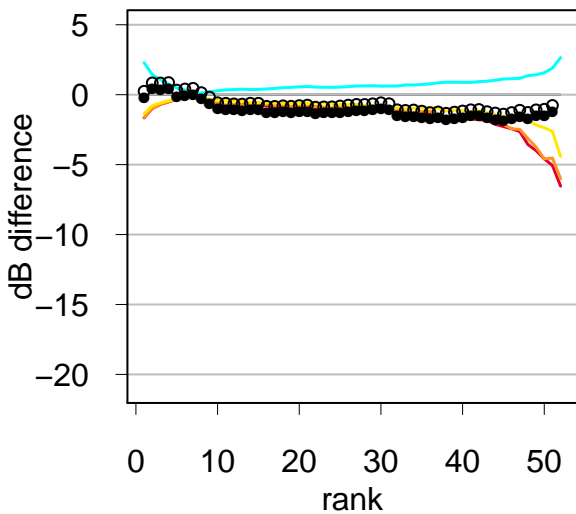

# Static Automated Perimetry. Single field analysis

Subject ID: 1015, age: 63, eye: OD (right)

Date: 11/11/2008 at 10:47

Duration: 05:20, pause: 00:00

false positives 0.0 %

false negatives 8.0 %

fixation losses 7.1 %

MS 28.5 dB

MD -1.7 dB (p < 95 %)

PSD 5.5 dB (p < 95 %)

VFI 92.6 % (p < 0.5 %)

GH 1.3 dB

total deviation

Central 24-2  
SITA standard

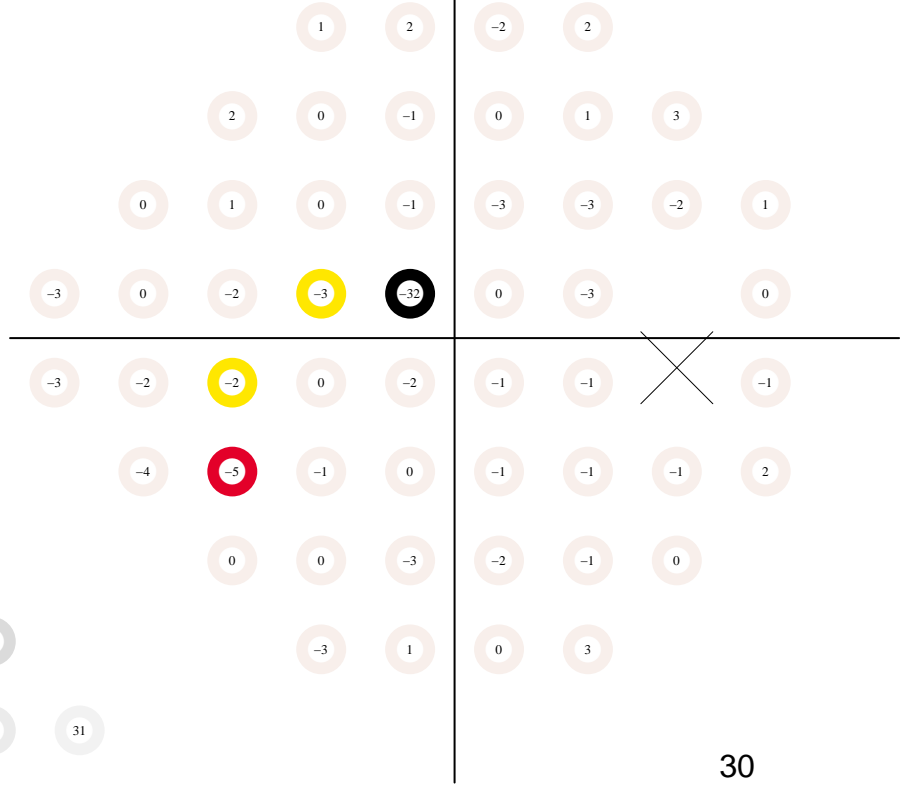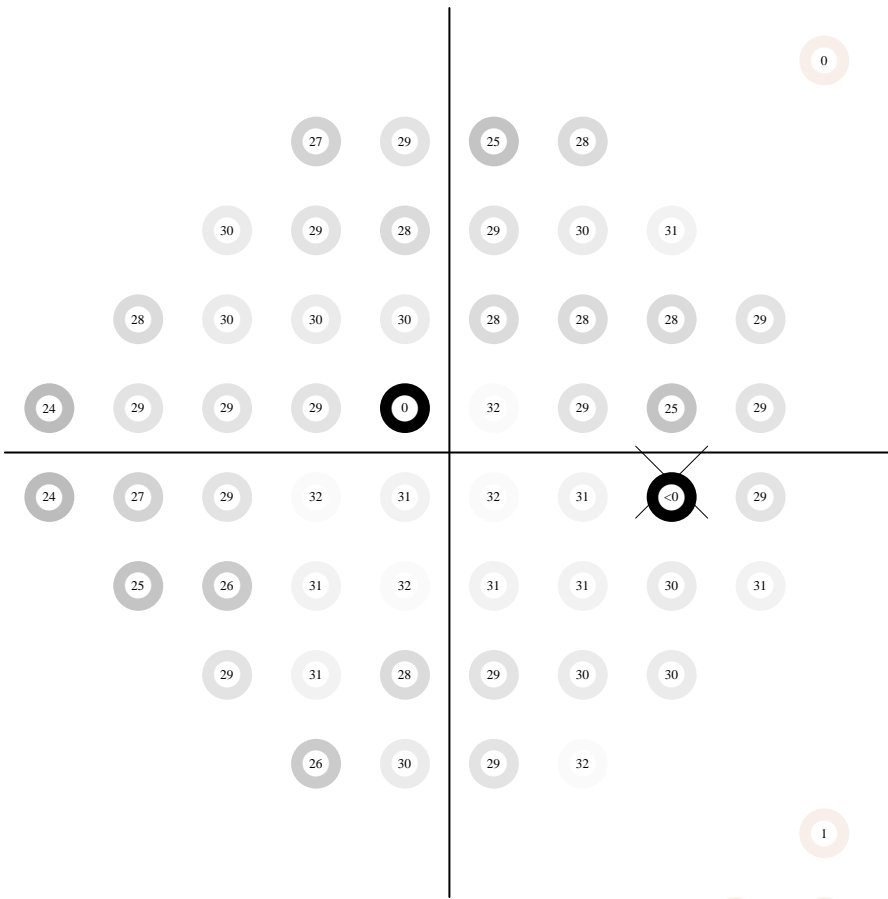

pattern deviation

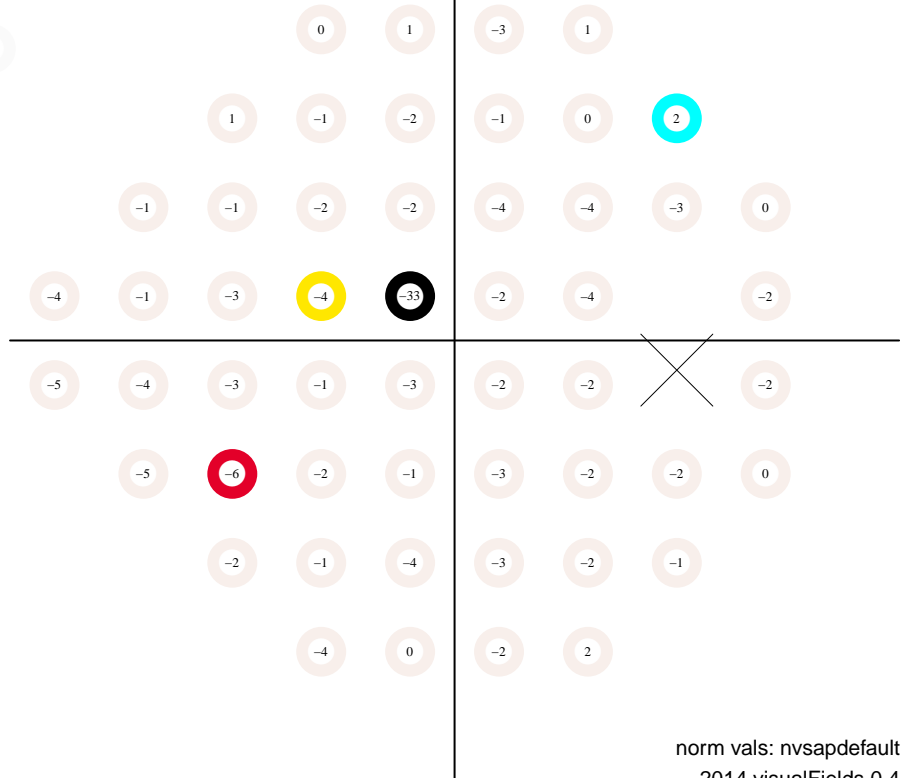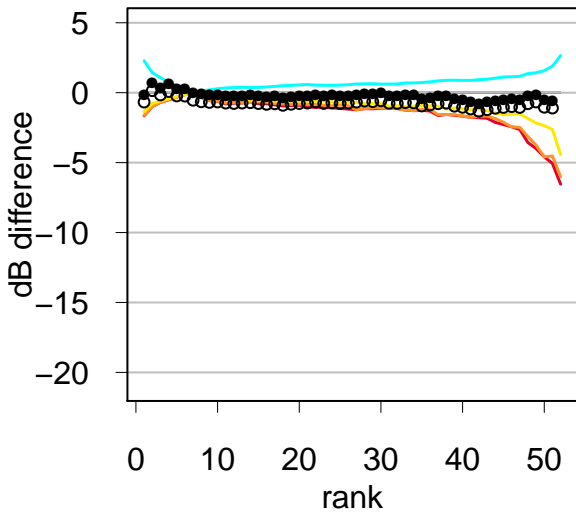

# Static Automated Perimetry. Single field analysis

Subject ID: 1015, age: 64, eye: OD (right)

Date: 06/01/2009 at 9:35:

Duration: 06:16, pause: 00:00

false positives 0.0 %

false negatives 4.0 %

fixation losses NA %

MS 29.5 dB

MD -0.6 dB (p < 95 %)

PSD 5.3 dB (p < 95 %)

VFI 97.6 % (p < 5 %)

GH 2.1 dB

total deviation

Central 24-2  
SITA standard

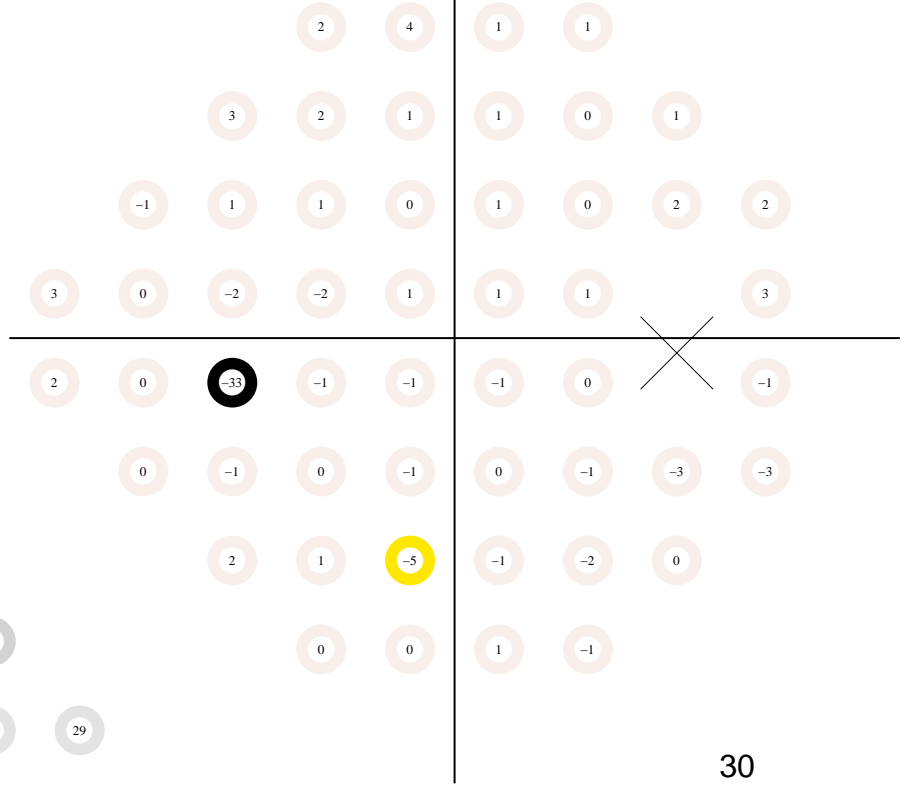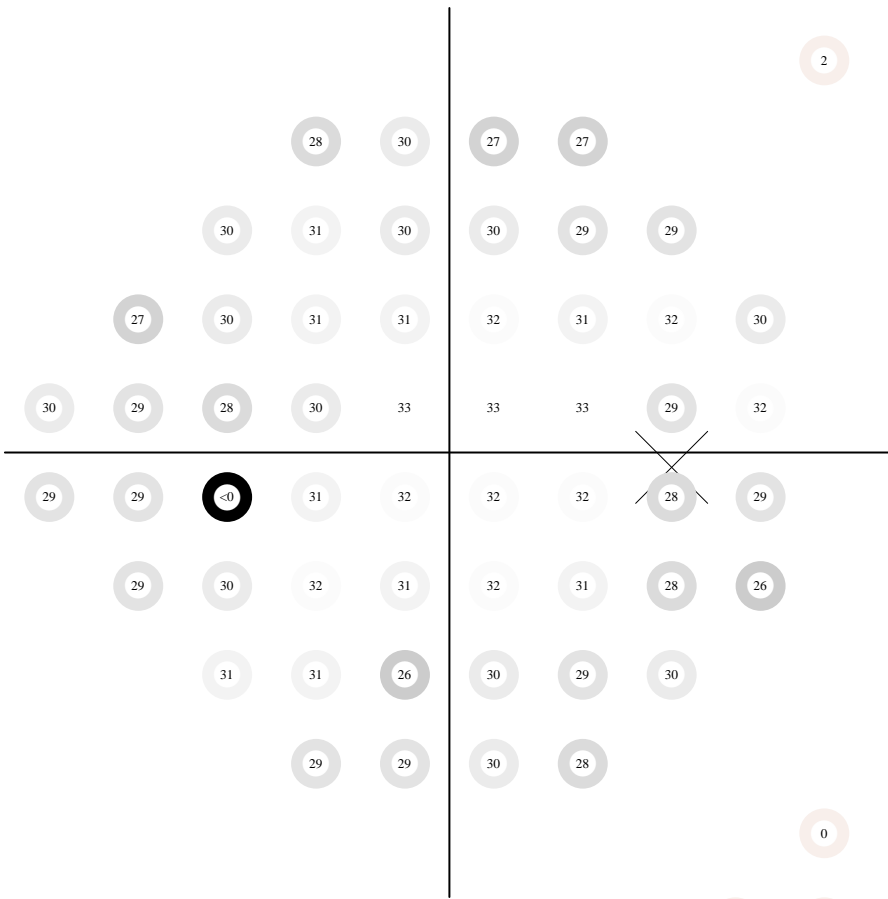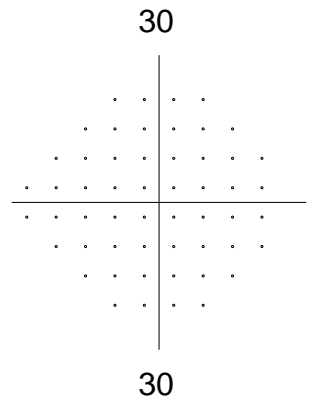

pattern deviation

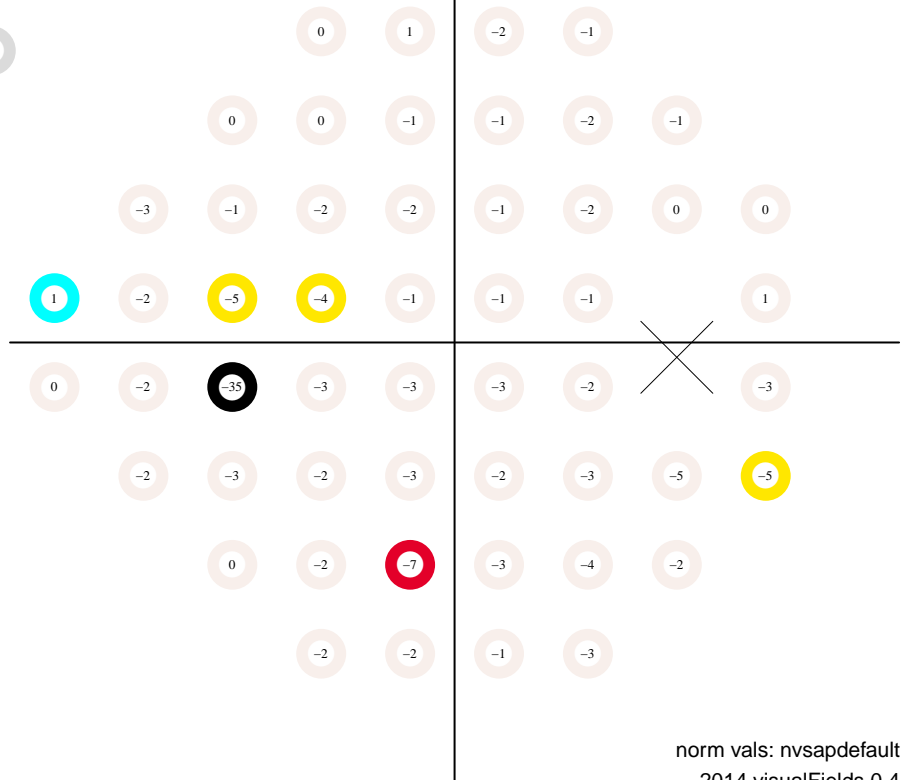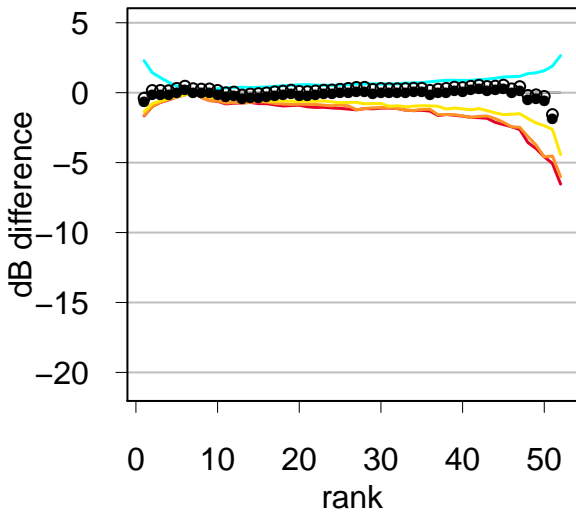

# Static Automated Perimetry. Single field analysis

Subject ID: 1015, age: 64, eye: OD (right)

Date: 06/02/2009 at 13:02

Duration: 04:44, pause: 00:00

false positives 0.0 %

false negatives 0.0 %

fixation losses 0.0 %

MS 28.9 dB

MD -1.3 dB (p < 95 %)

PSD 5.9 dB (p < 95 %)

VFI 91.6 % (p < 0.5 %)

GH 2.0 dB

total deviation

Central 24-2  
SITA standard

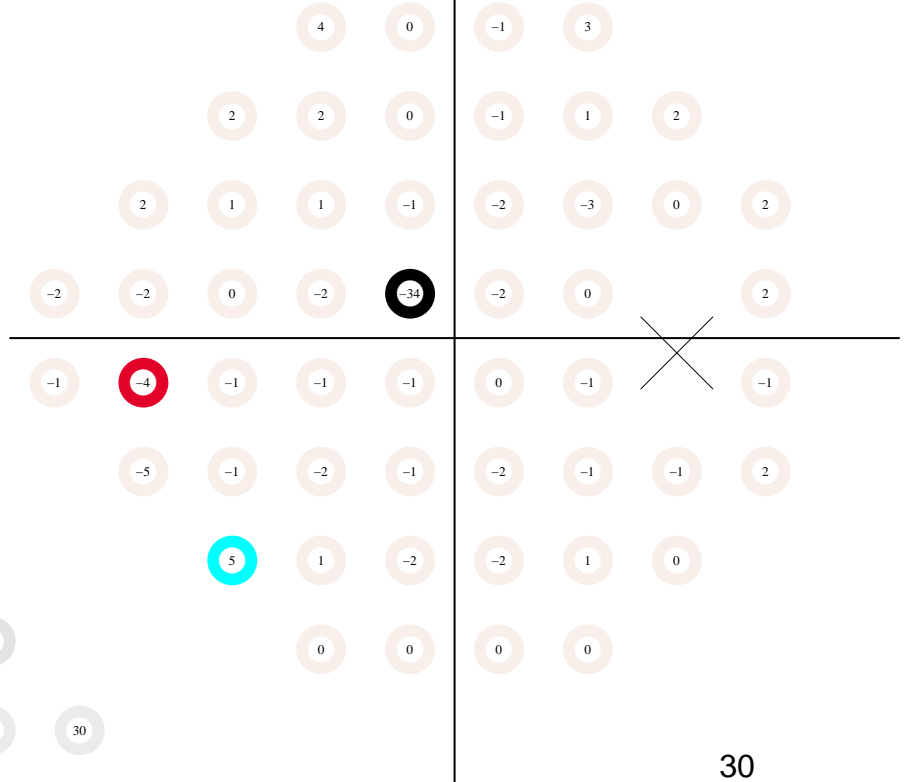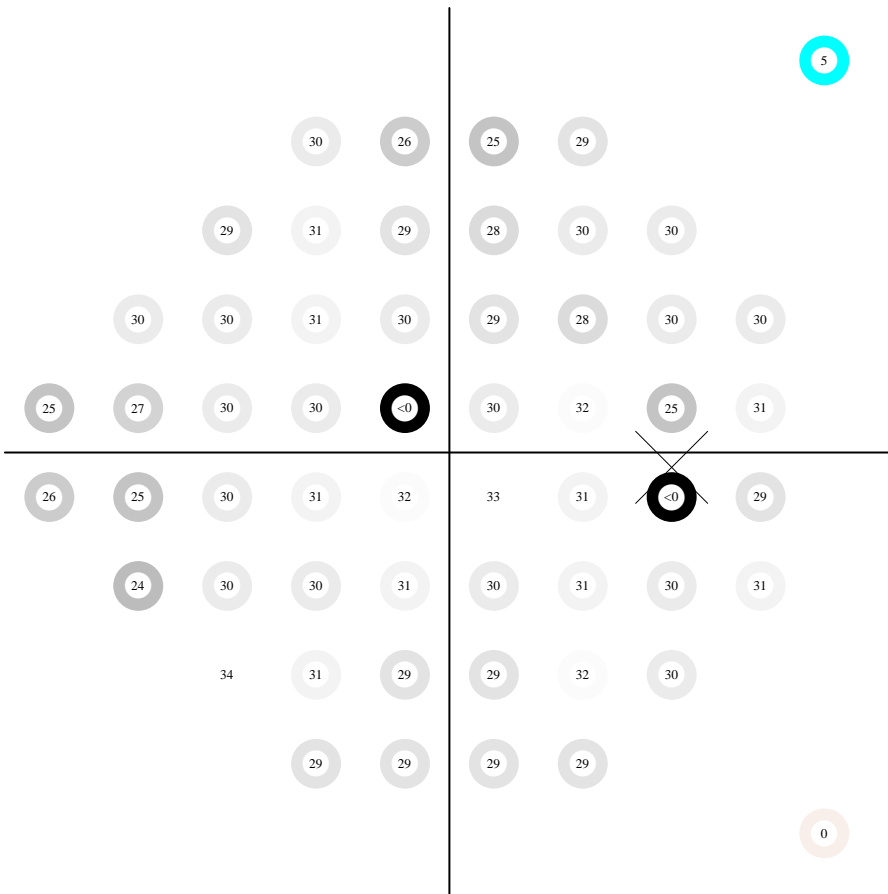

pattern deviation

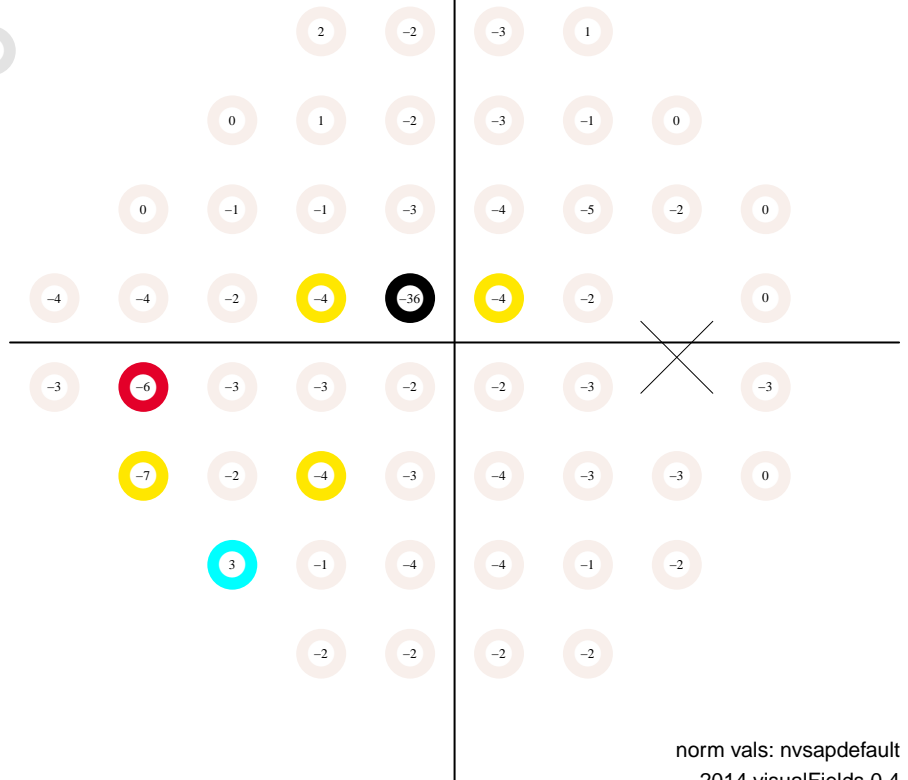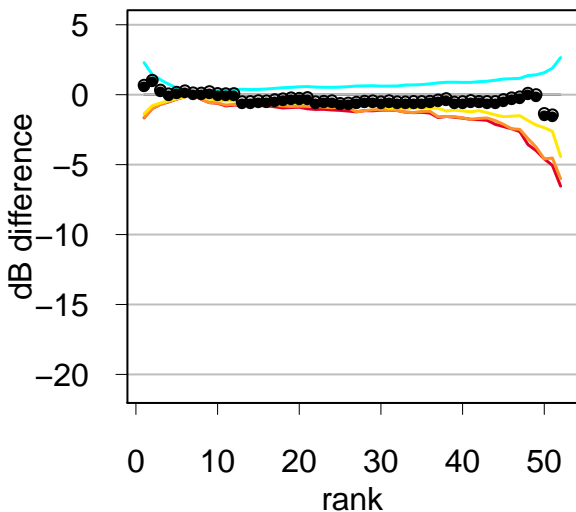

# Static Automated Perimetry. Single field analysis

Subject ID: 1015, age: 64, eye: OD (right)

Date: 09/09/2009 at 13:24

Duration: 05:15, pause: 00:00

false positives 1.0 %

false negatives 0.0 %

fixation losses 0.0 %

MS 29.0 dB

MD -1.2 dB (p < 95 %)

PSD 5.6 dB (p < 95 %)

VFI 92.9 % (p < 0.5 %)

GH 1.4 dB

total deviation

Central 24-2  
SITA standard

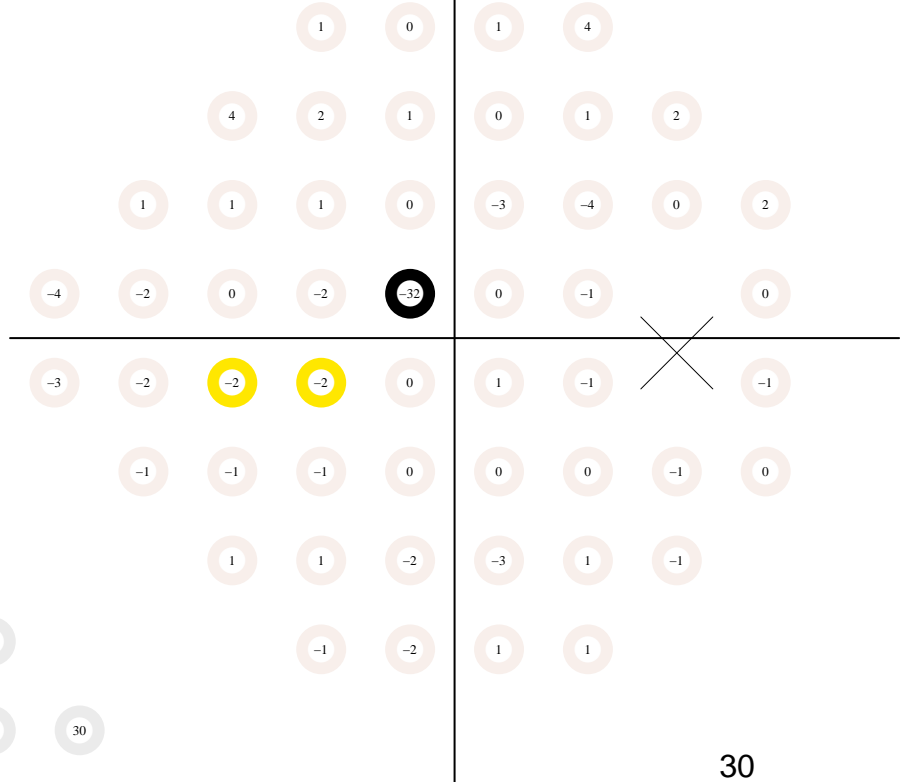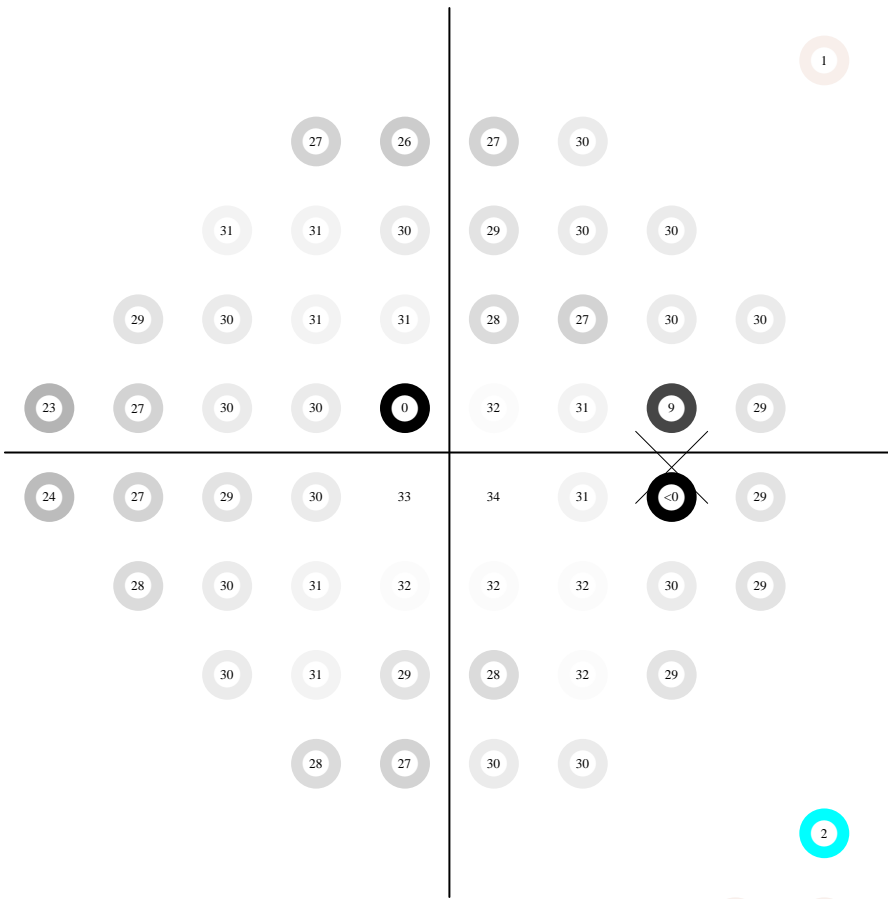

pattern deviation

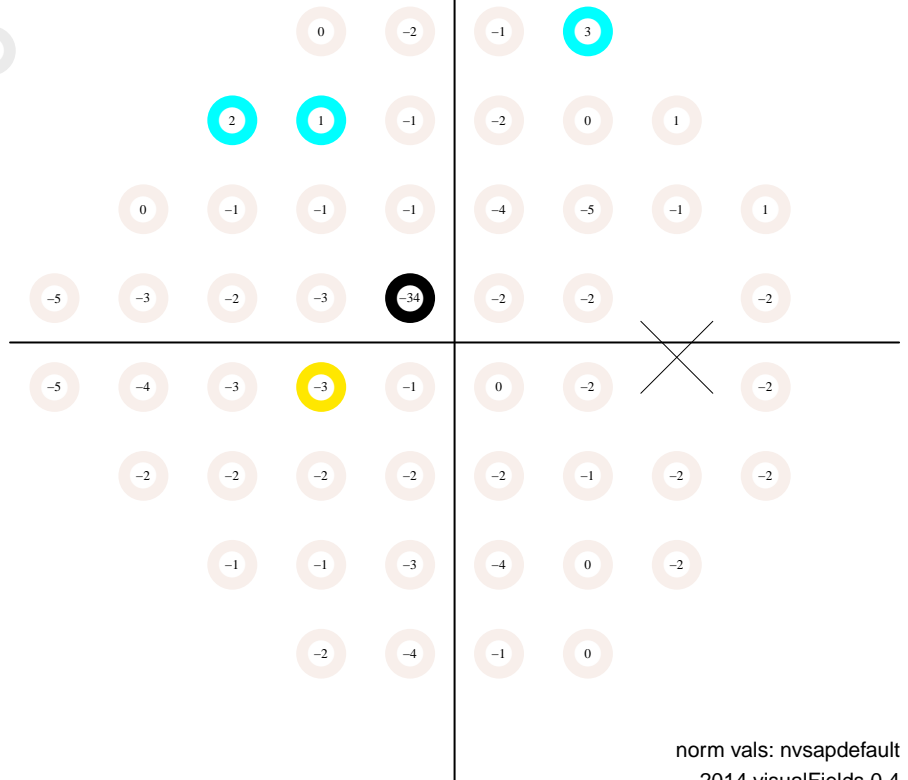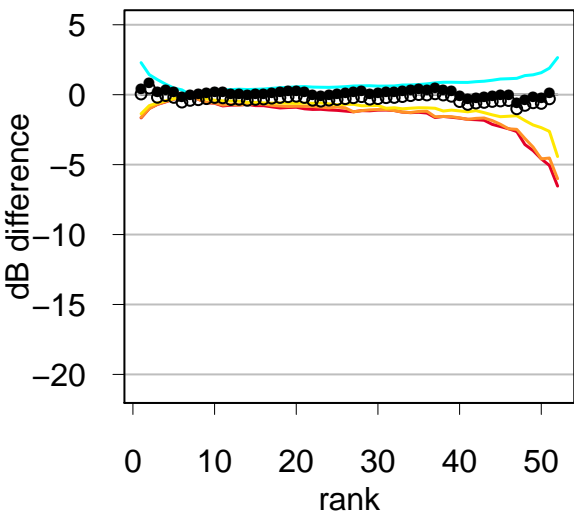

# Static Automated Perimetry. Single field analysis

Subject ID: 1015, age: 64, eye: OD (right)

Date: 12/02/2009 at 9:45:

Duration: 04:53, pause: 00:00

false positives 0.0 %

false negatives 10.0 %

fixation losses 0.0 %

MS 28.6 dB

MD -1.6 dB (p < 95 %)

PSD 5.5 dB (p < 95 %)

VFI 93.0 % (p < 0.5 %)

GH 0.9 dB

total deviation

Central 24-2  
SITA standard

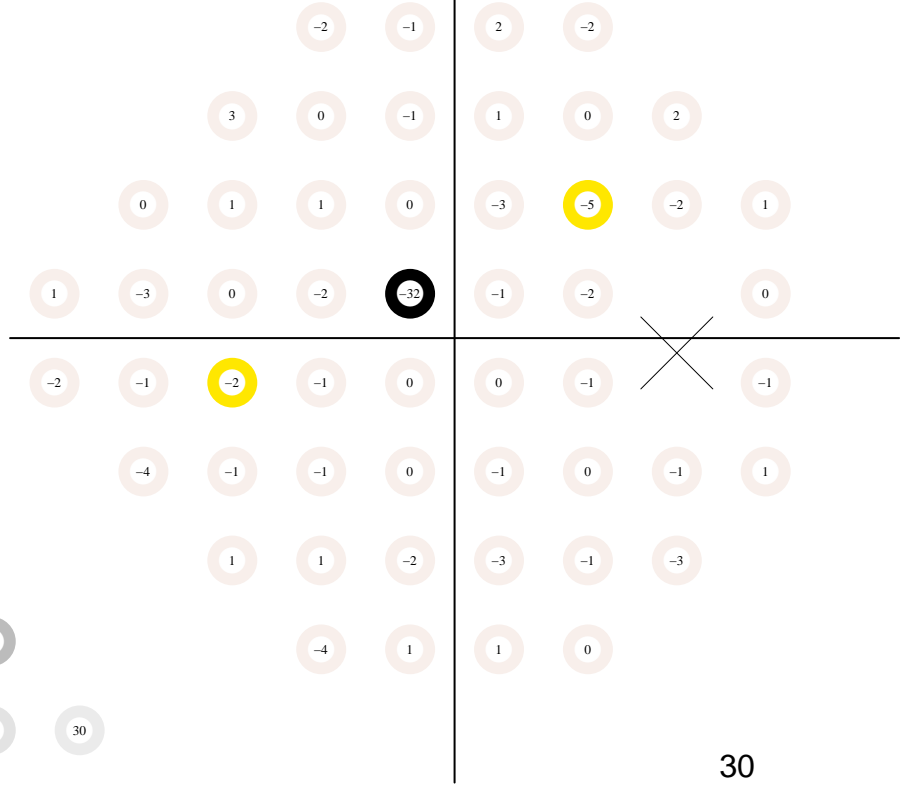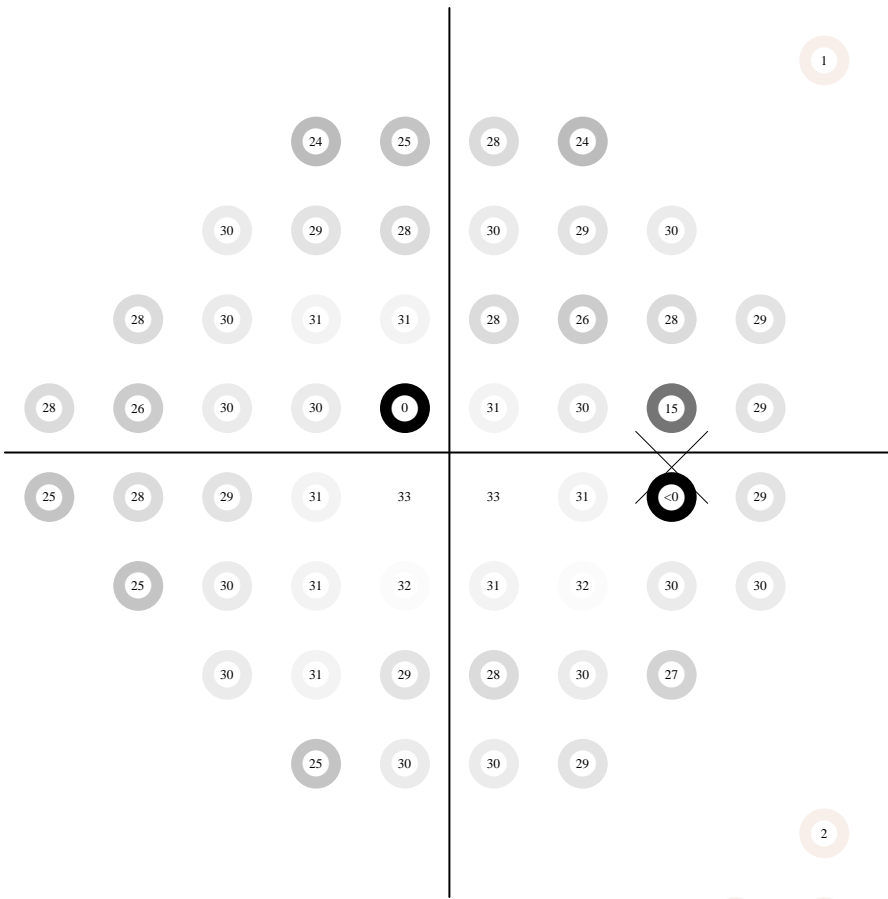

pattern deviation

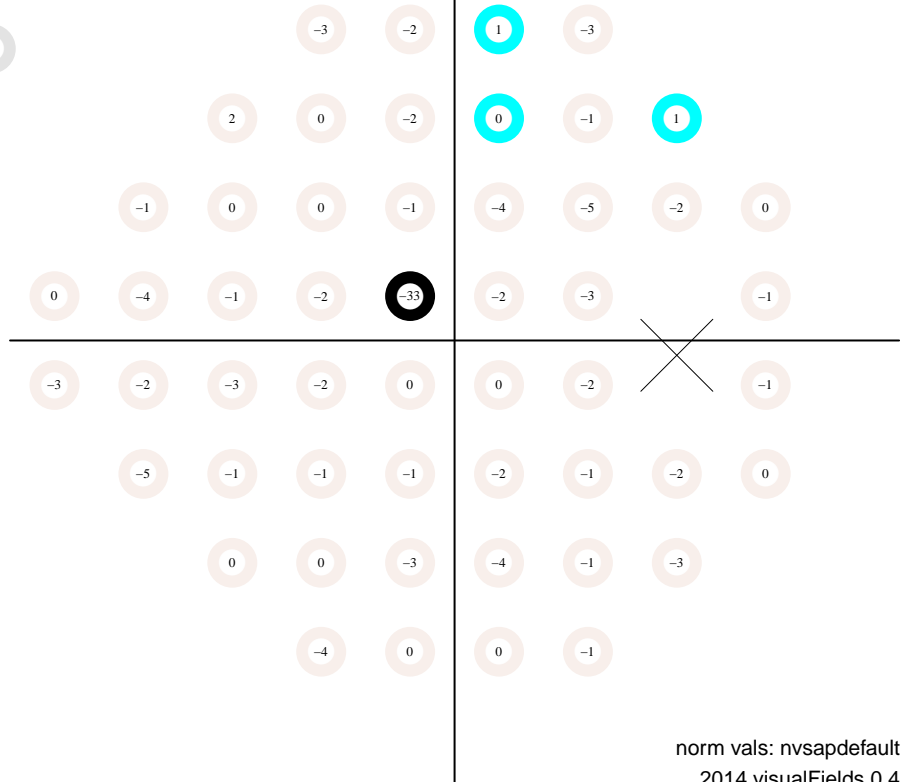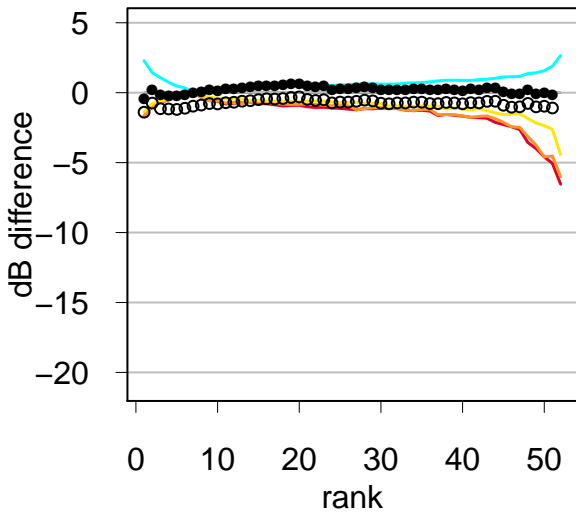



# Static Automated Perimetry. Single field analysis

Subject ID: 1015, age: 65, eye: OD (right)

Date: 06/16/2010 at 8:22:

Duration: 04:29, pause: 00:00

false positives 0.0 %

false negatives 8.0 %

fixation losses 0.0 %

MS 29.4 dB

MD -0.7 dB (p < 95 %)

PSD 5.7 dB (p < 95 %)

VFI 92.1 % (p < 0.5 %)

GH 2.5 dB

total deviation

Central 24-2  
SITA standard

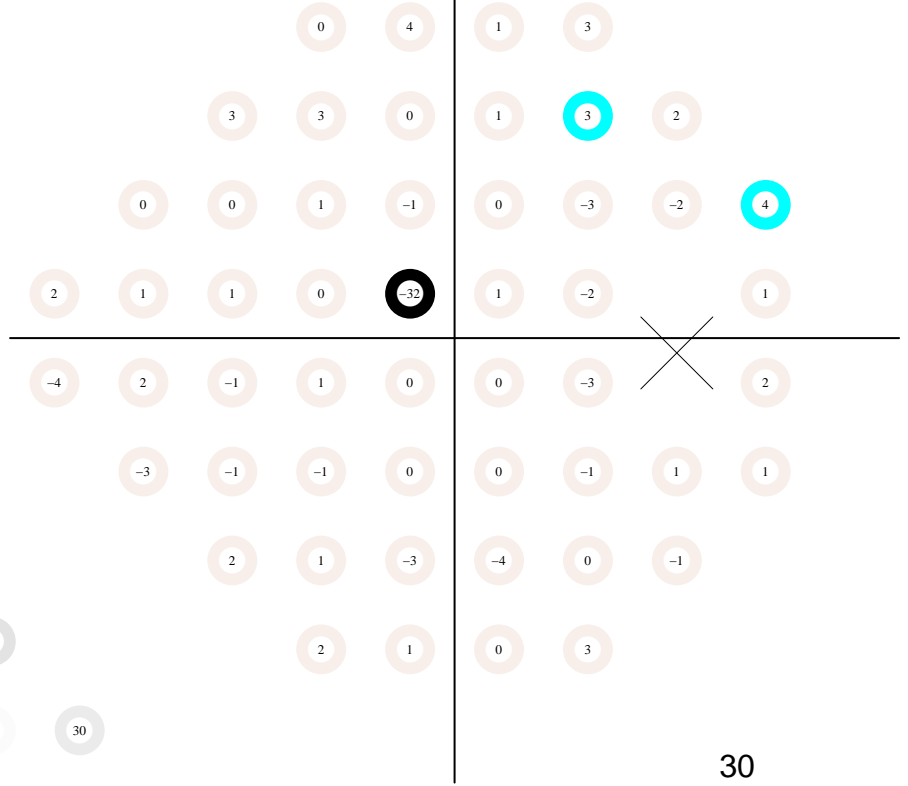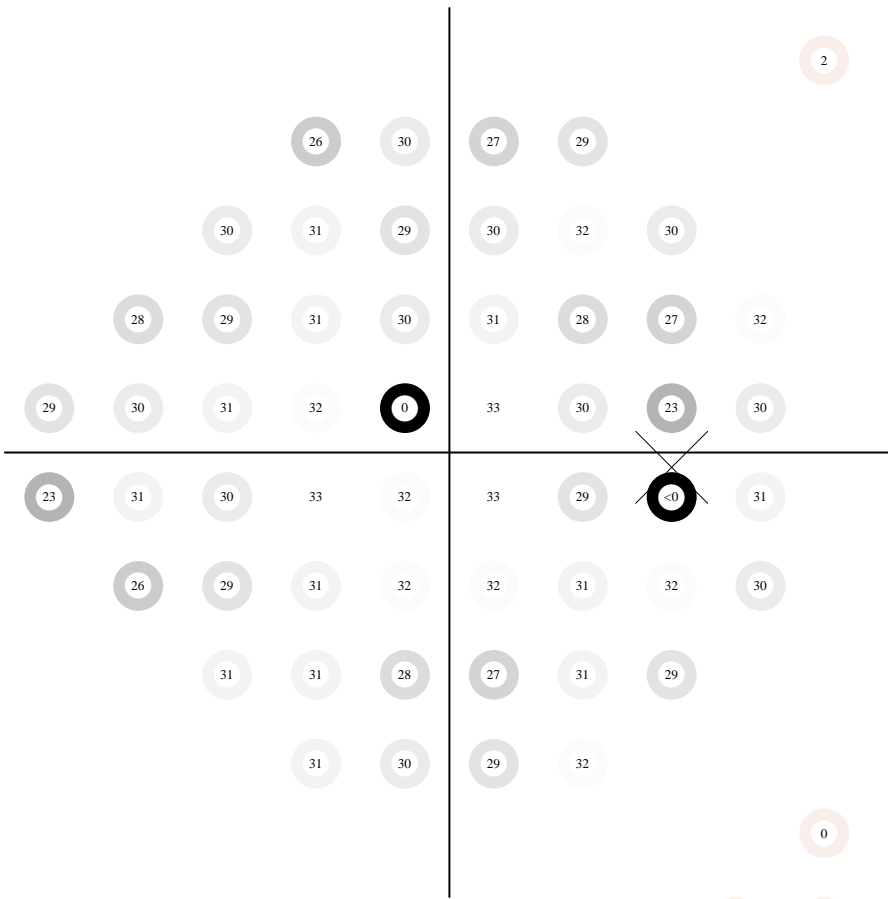

pattern deviation

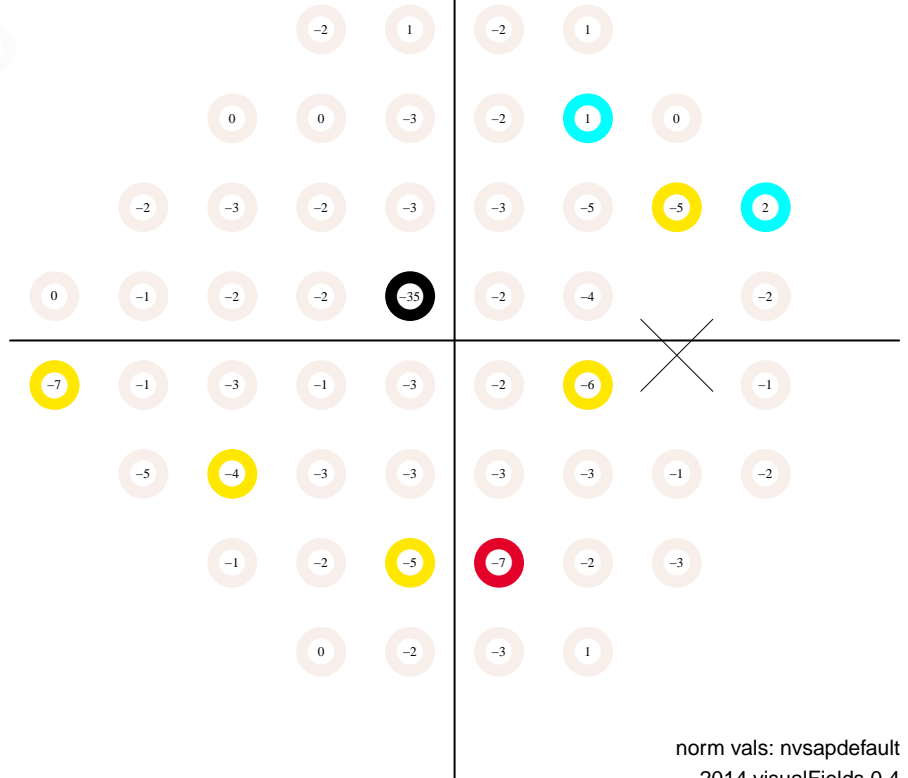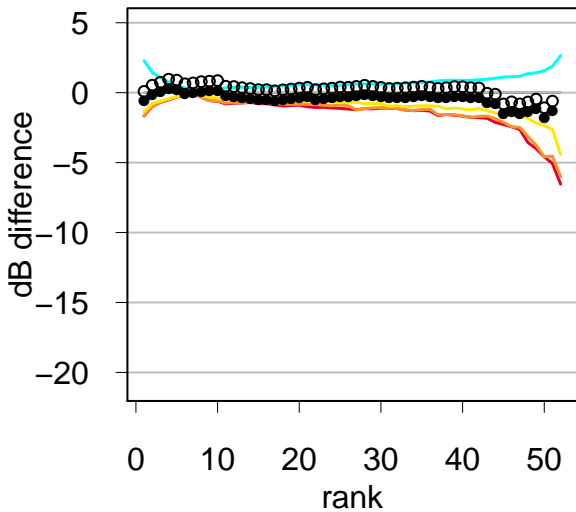





# Static Automated Perimetry. Single field analysis

Subject ID: 1015, age: 66, eye: OD (right)

Date: 09/16/2011 at 6:36:

Duration: 04:58, pause: 00:00

false positives 0.0 %

false negatives 0.0 %

fixation losses 7.1 %

MS 28.6 dB

MD -1.4 dB (p < 95 %)

PSD 5.6 dB (p < 95 %)

VFI 91.4 % (p < 0.5 %)

GH 2.4 dB

total deviation

Central 24-2  
SITA standard

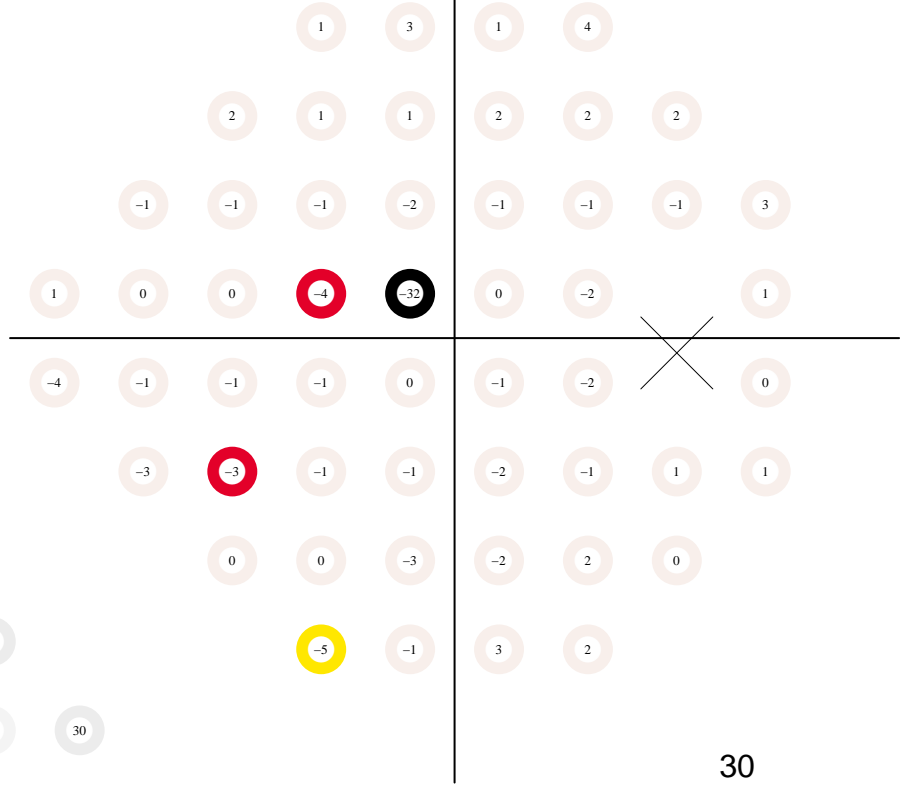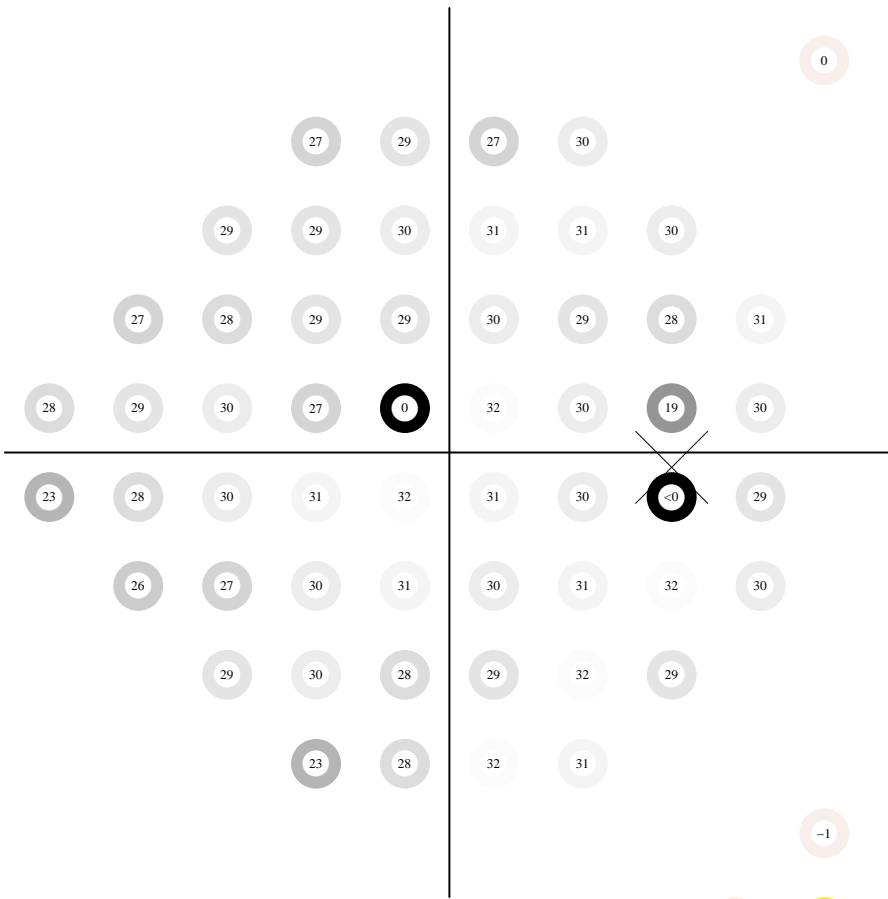

pattern deviation

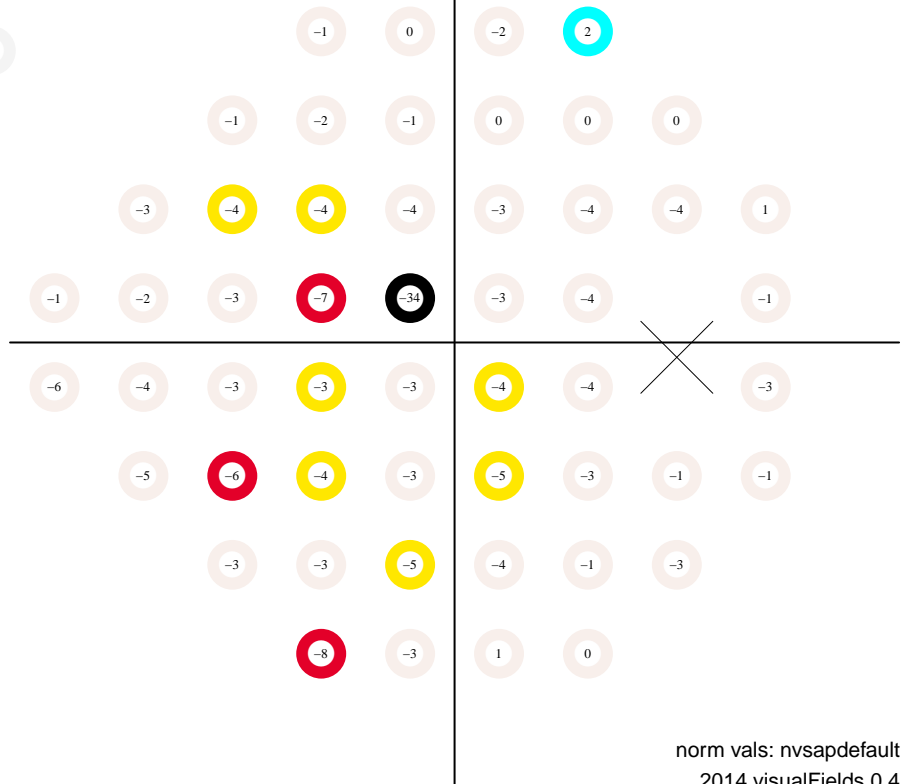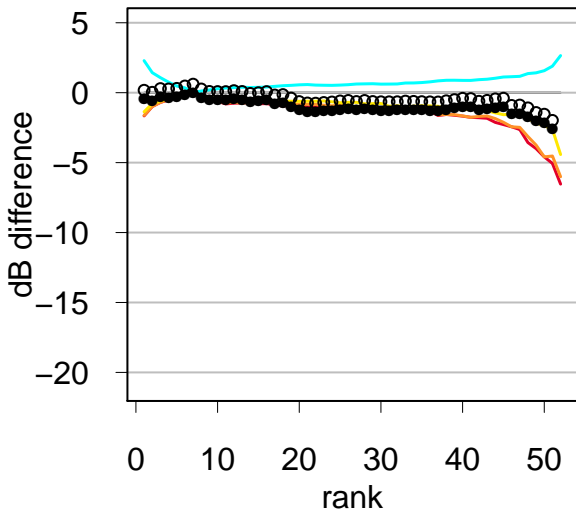

# Static Automated Perimetry. Single field analysis

Subject ID: 1015, age: 66, eye: OD (right)

Date: 11/22/2011 at 10:52

Duration: 05:14, pause: 00:00

false positives 0.0 %

false negatives 2.0 %

fixation losses 0.0 %

MS 27.2 dB

MD -2.7 dB (p < 5 %)

PSD 5.8 dB (p < 5 %)

VFI 91.1 % (p < 0.5 %)

GH -0.0 dB

total deviation

Central 24-2  
SITA standard

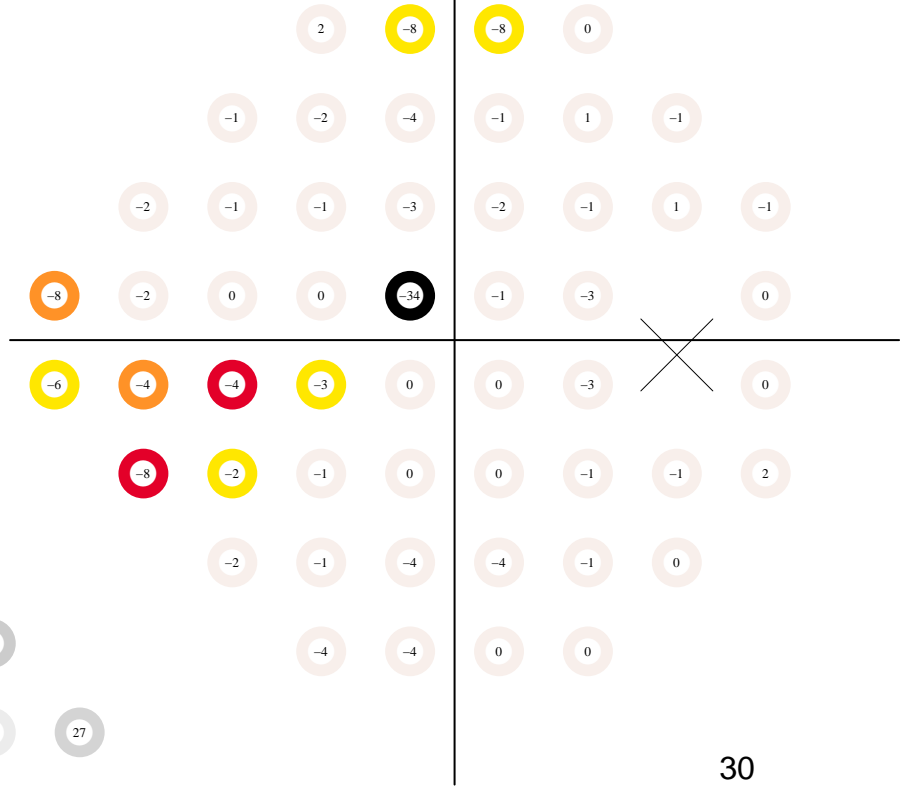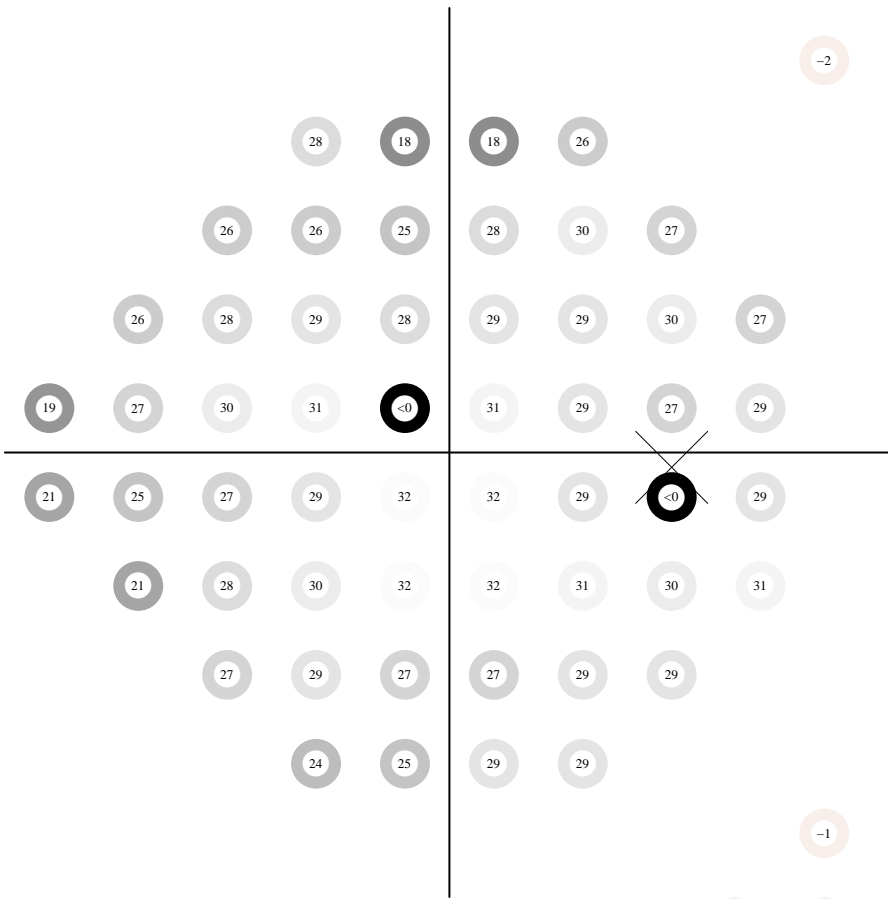

pattern deviation

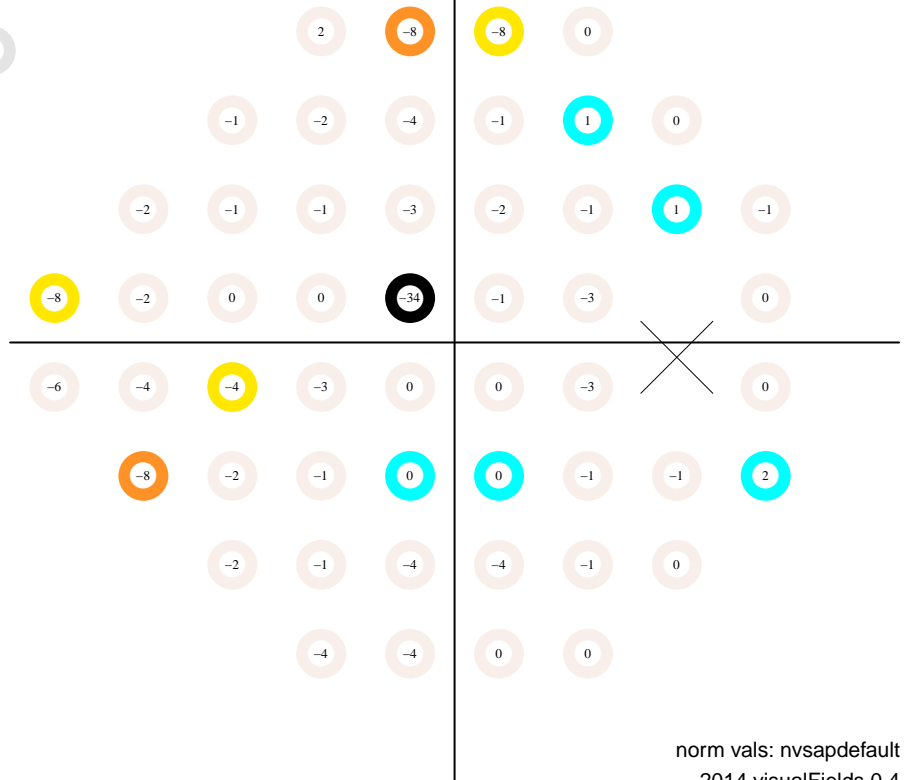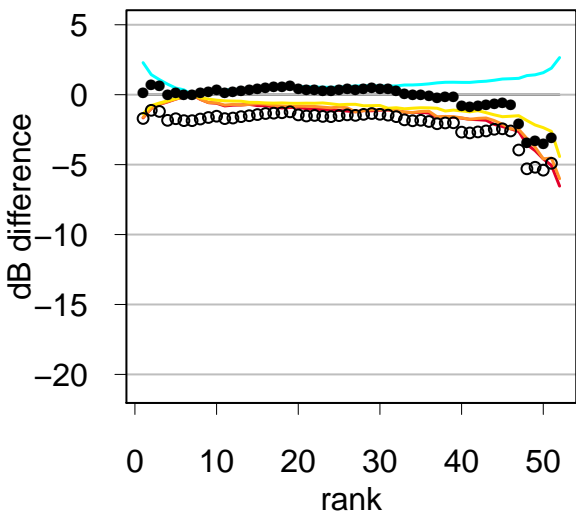

# Static Automated Perimetry. Single field analysis

Subject ID: 1015, age: 67, eye: OD (right)

Date: 03/06/2012 at 10:57

Duration: 04:57, pause: 00:00

false positives 1.0 %

false negatives 0.0 %

fixation losses 0.0 %

MS 28.3 dB

MD -1.6 dB (p < 95 %)

PSD 5.8 dB (p < 95 %)

VFI 92.3 % (p < 0.5 %)

GH 0.9 dB

total deviation

Central 24-2  
SITA standard

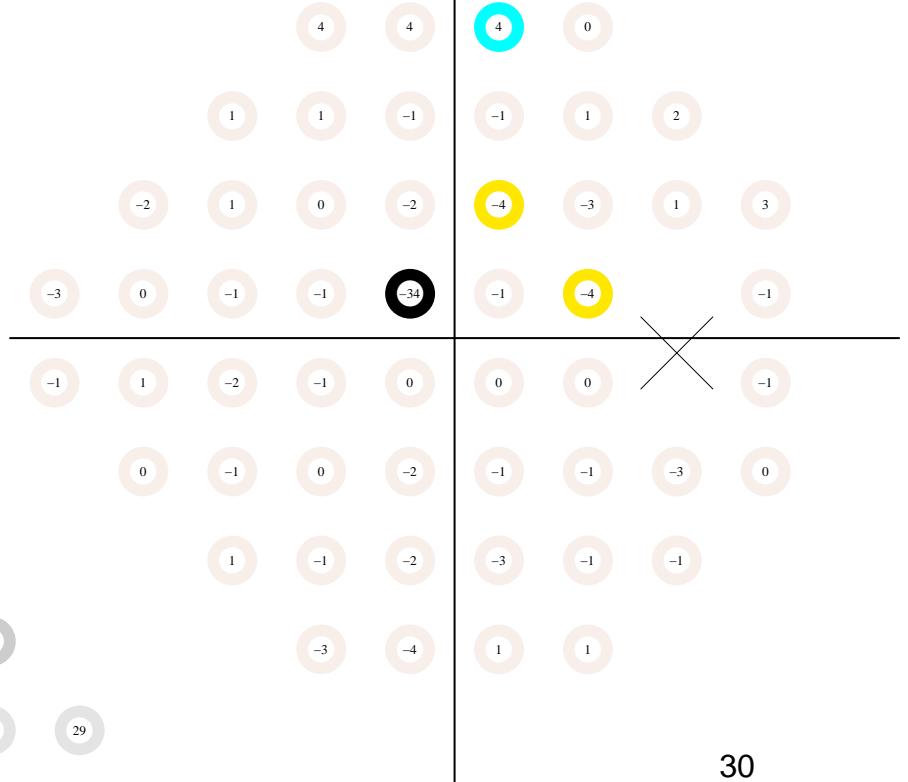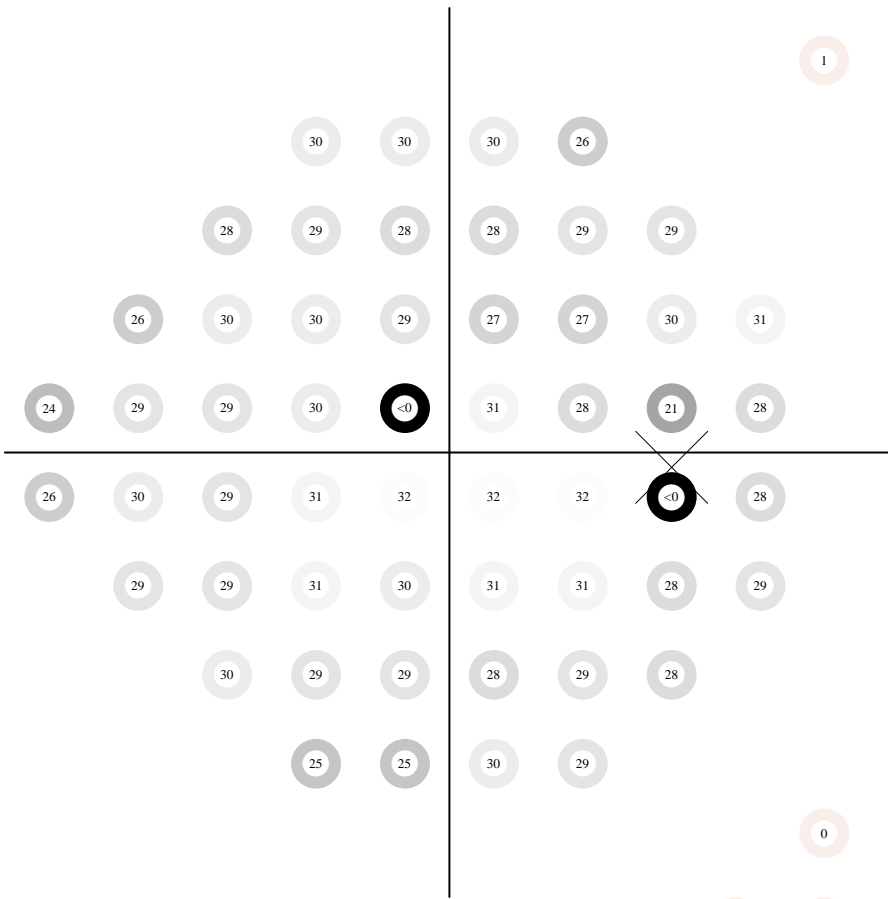

pattern deviation

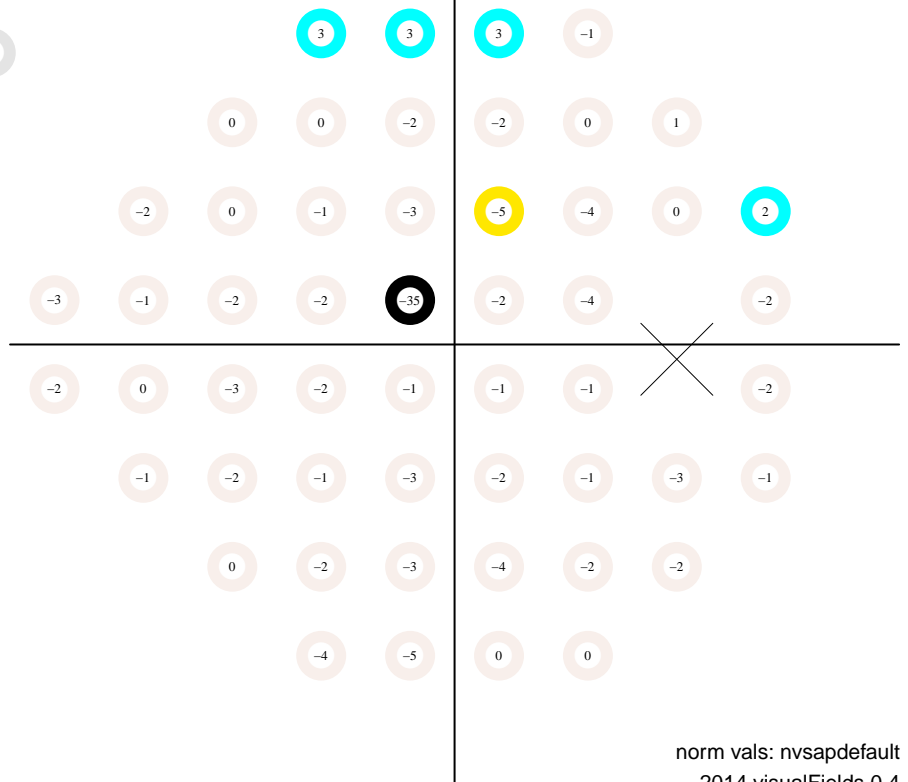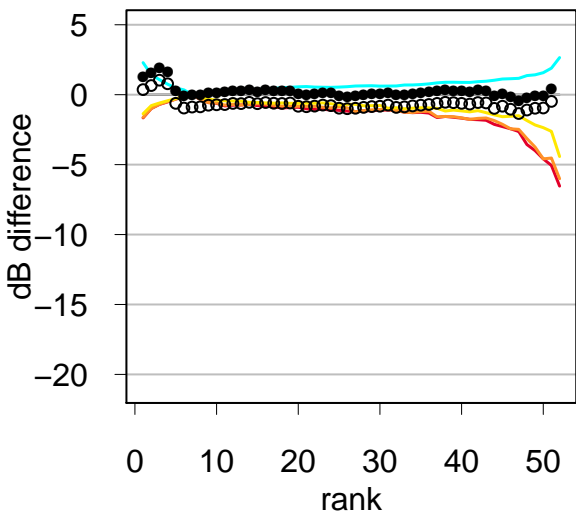

# Static Automated Perimetry. Single field analysis

Subject ID: 1015, age: 67, eye: OD (right)

Date: 06/26/2012 at 8:32:

Duration: 04:55, pause: 00:00

false positives 1.0 %

false negatives 0.0 %

fixation losses 7.1 %

MS 28.5 dB

MD -1.4 dB (p < 95 %)

PSD 5.9 dB (p < 95 %)

VFI 91.6 % (p < 0.5 %)

GH 1.7 dB

total deviation

Central 24-2  
SITA standard

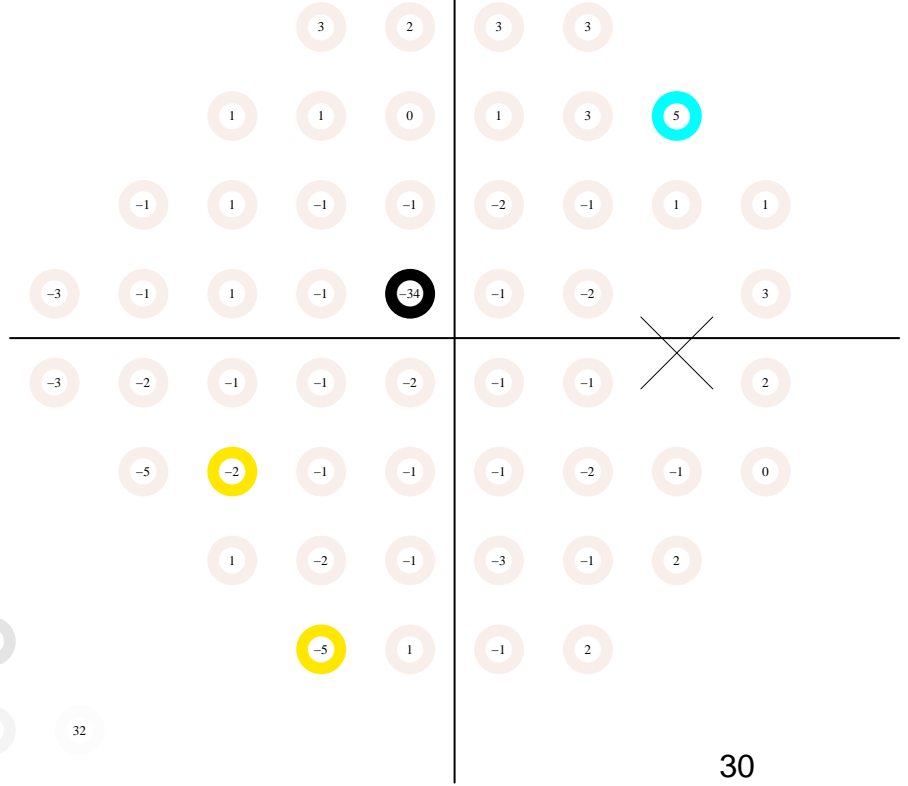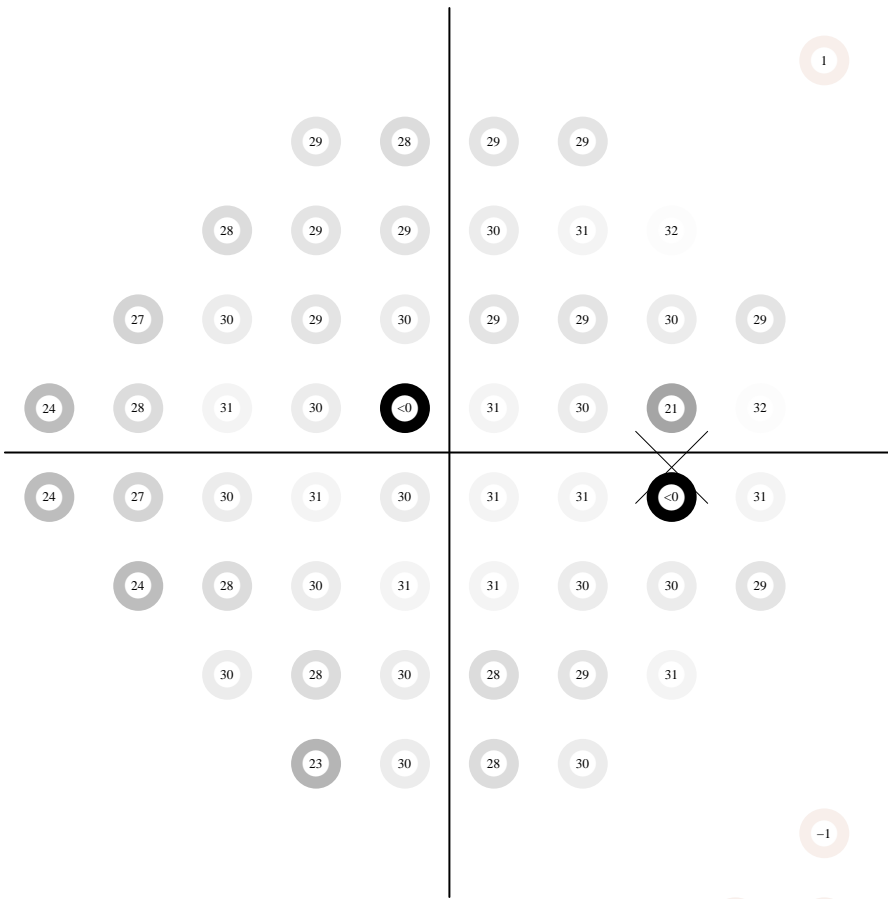

pattern deviation

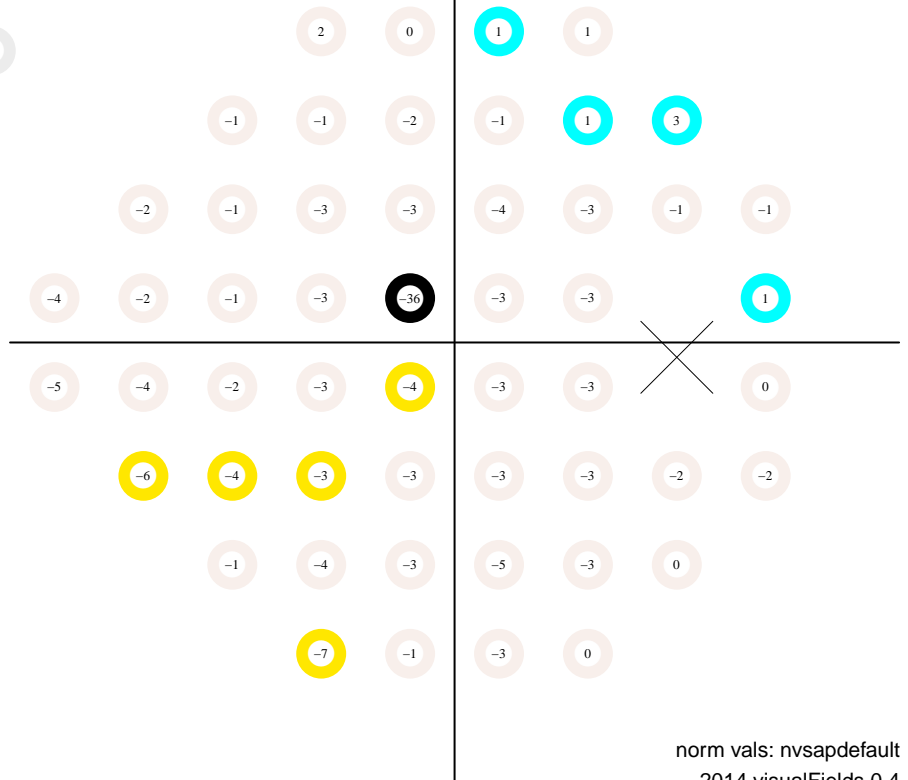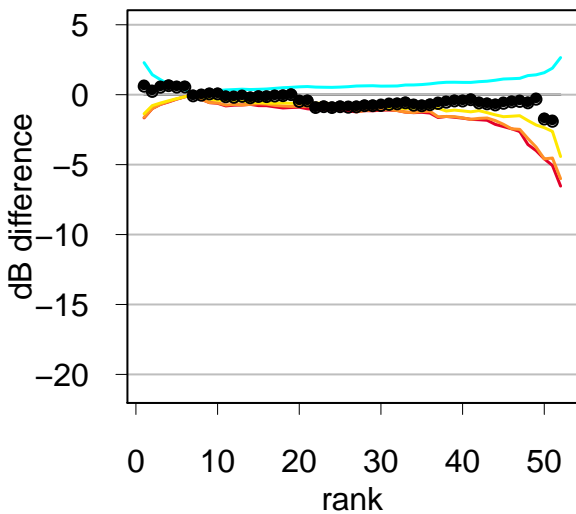

# Static Automated Perimetry. Single field analysis

Subject ID: 1015, age: 67, eye: OD (right)

Date: 09/26/2012 at 11:28

Duration: 05:50, pause: 00:00

false positives 1.0 %

false negatives 0.0 %

fixation losses 0.0 %

MS 27.2 dB

MD -2.7 dB (p < 5 %)

PSD 5.7 dB (p < 5 %)

VFI 91.1 % (p < 0.5 %)

GH 0.5 dB

total deviation

Central 24-2  
SITA standard

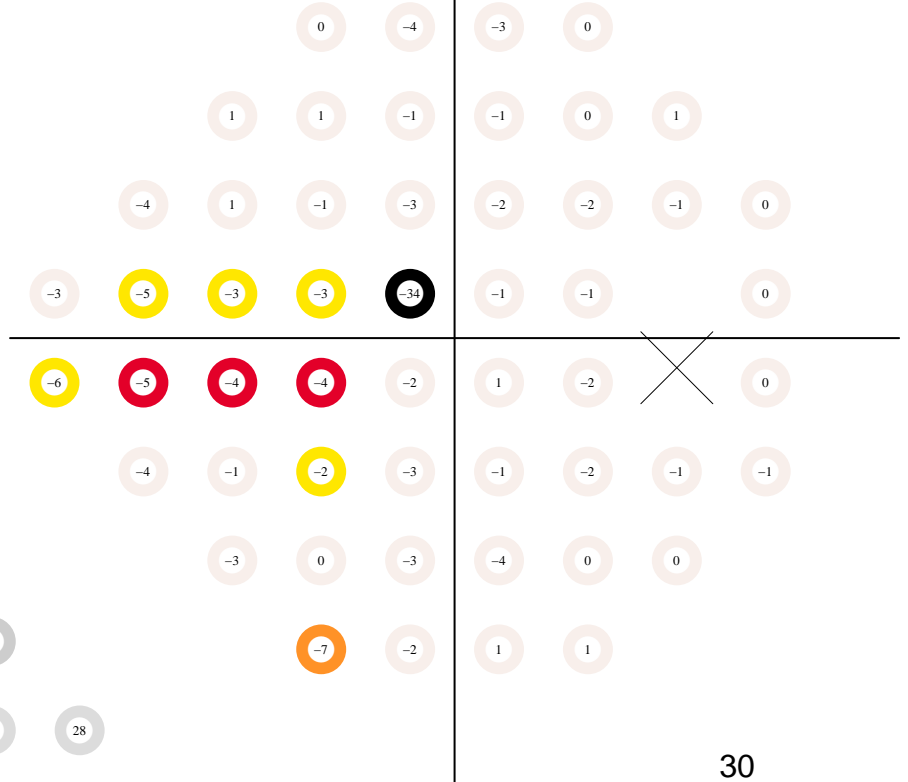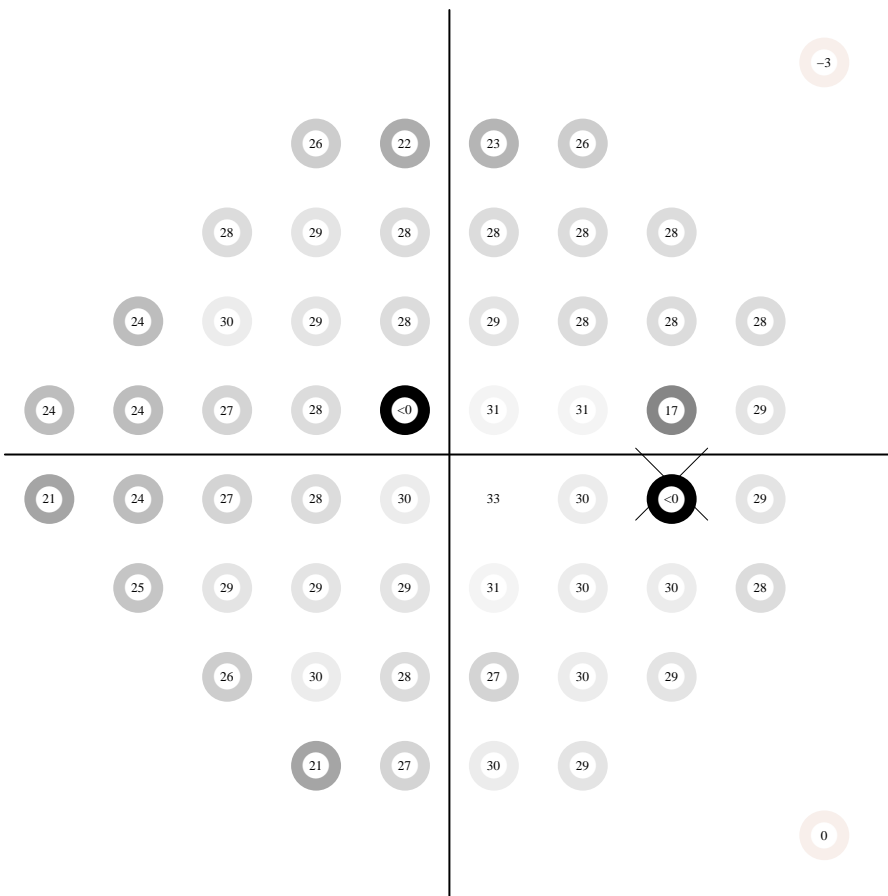

pattern deviation

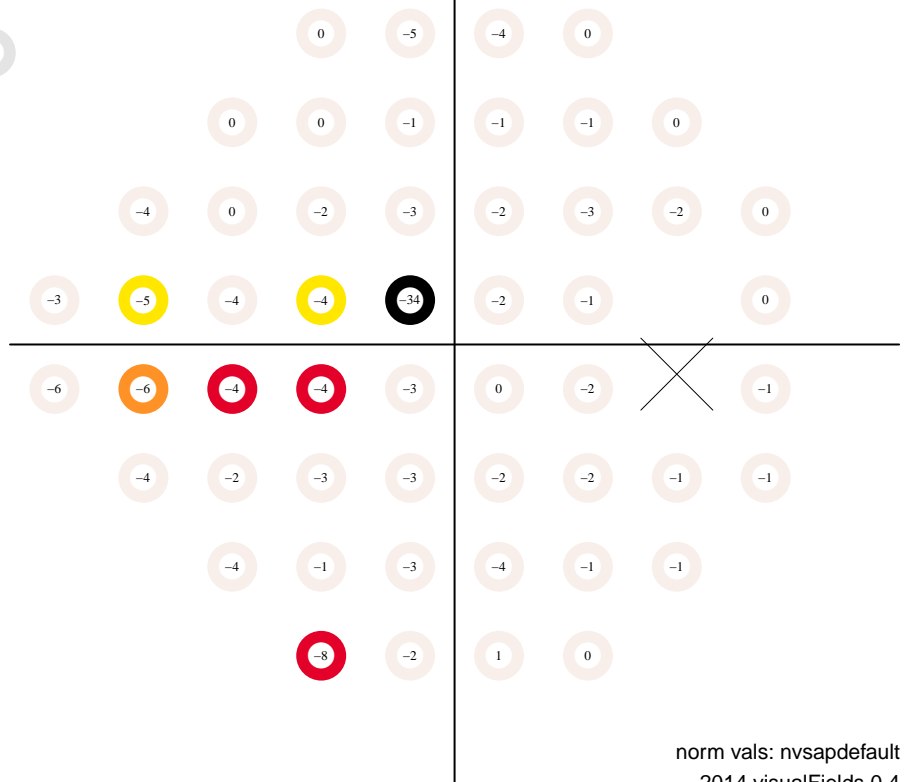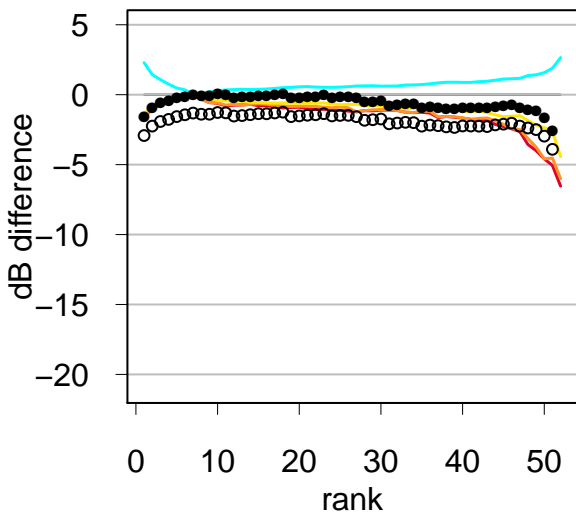



# Static Automated Perimetry. Single field analysis

Subject ID: 1015, age: 67, eye: OD (right)

Date: 11/09/2012 at 8:08:

Duration: 05:14, pause: 00:00

false positives 0.0 %

false negatives 1.0 %

fixation losses 6.7 %

MS 27.8 dB

MD -2.2 dB (p < 95 %)

PSD 5.8 dB (p < 95 %)

VFI 91.0 % (p < 0.5 %)

GH 1.3 dB

total deviation

Central 24-2  
SITA standard

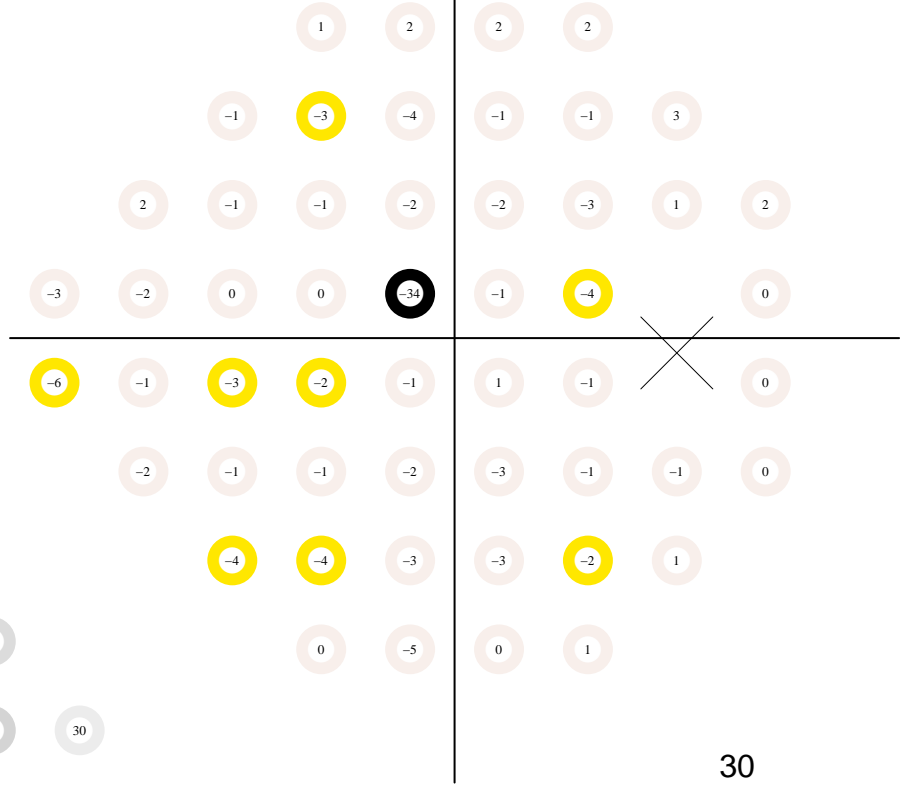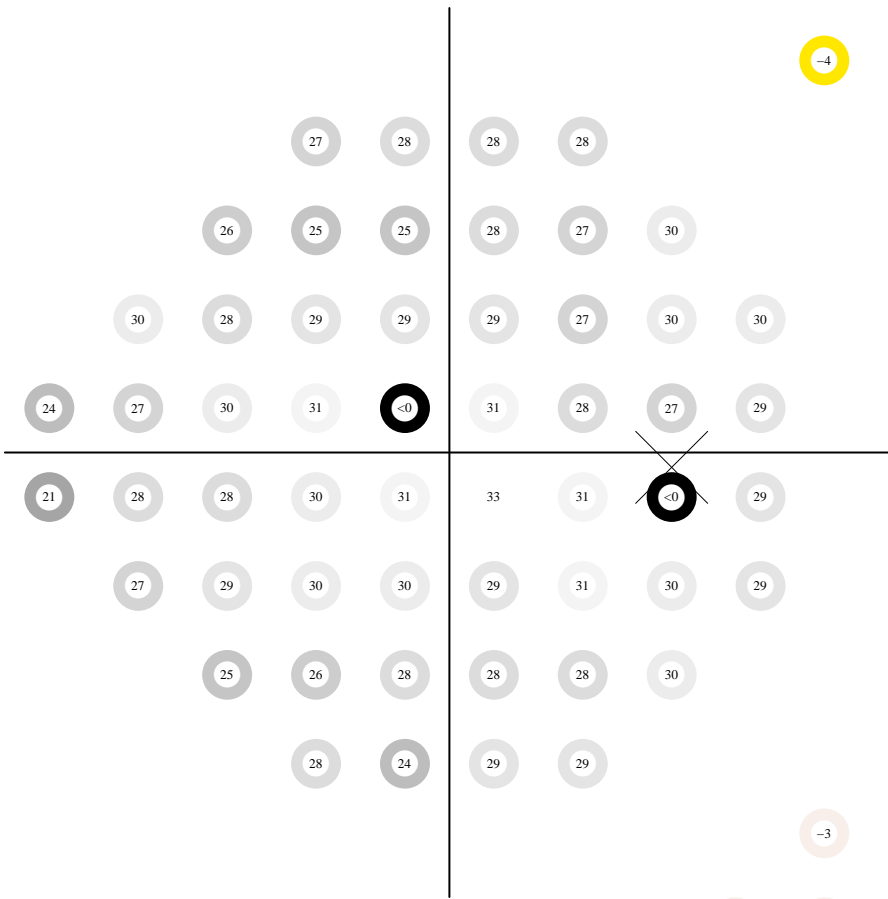

pattern deviation

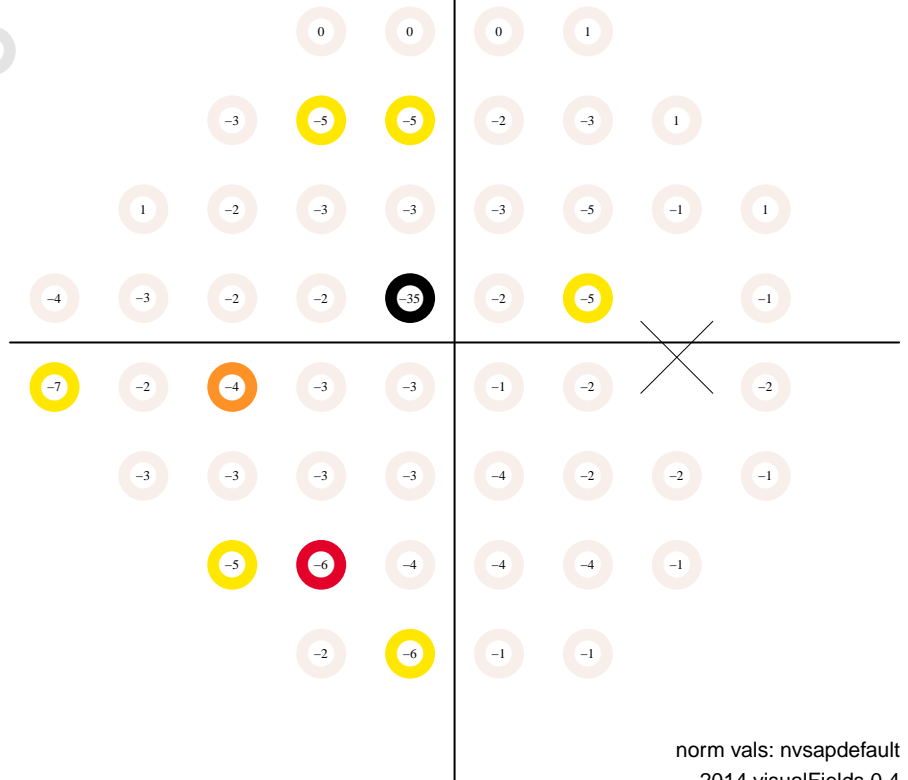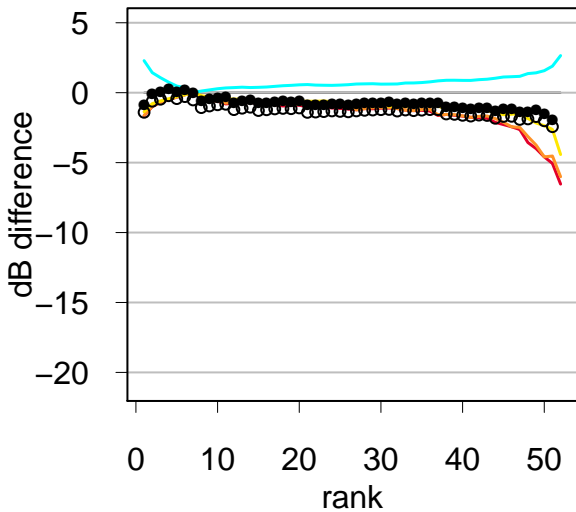

# Static Automated Perimetry. Single field analysis

Subject ID: 1015, age: 67, eye: OD (right)

Date: 01/08/2013 at 14:10

Duration: 05:27, pause: 00:00

false positives 1.0 %

false negatives 0.0 %

fixation losses 0.0 %

MS 28.2 dB

MD -1.7 dB (p < 95 %)

PSD 5.6 dB (p < 95 %)

VFI 91.7 % (p < 0.5 %)

GH 1.7 dB

total deviation

Central 24-2  
SITA standard

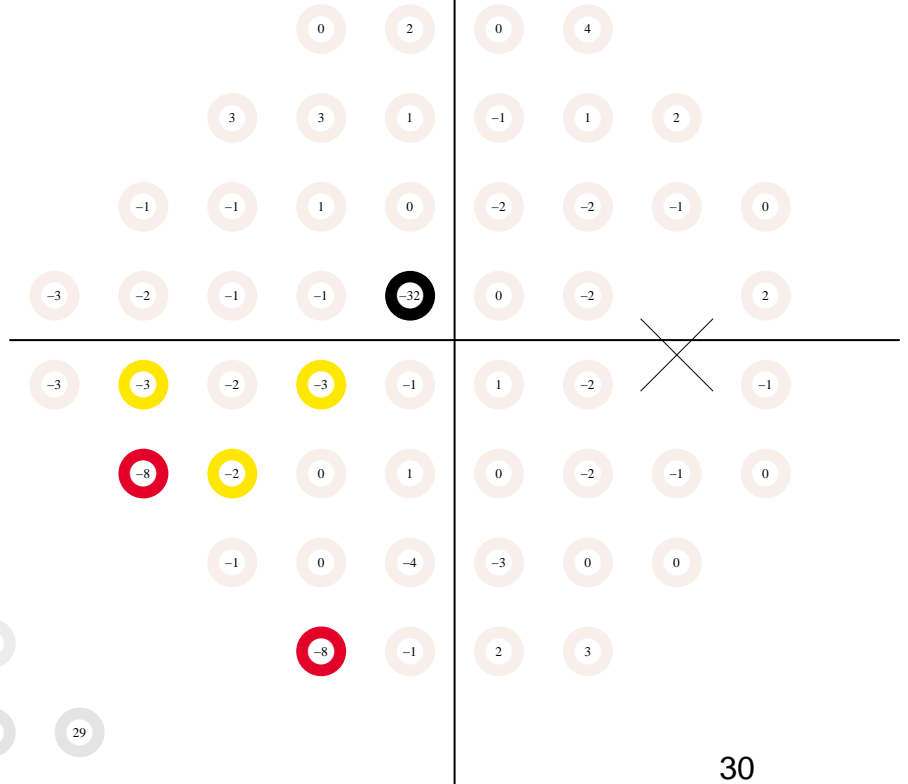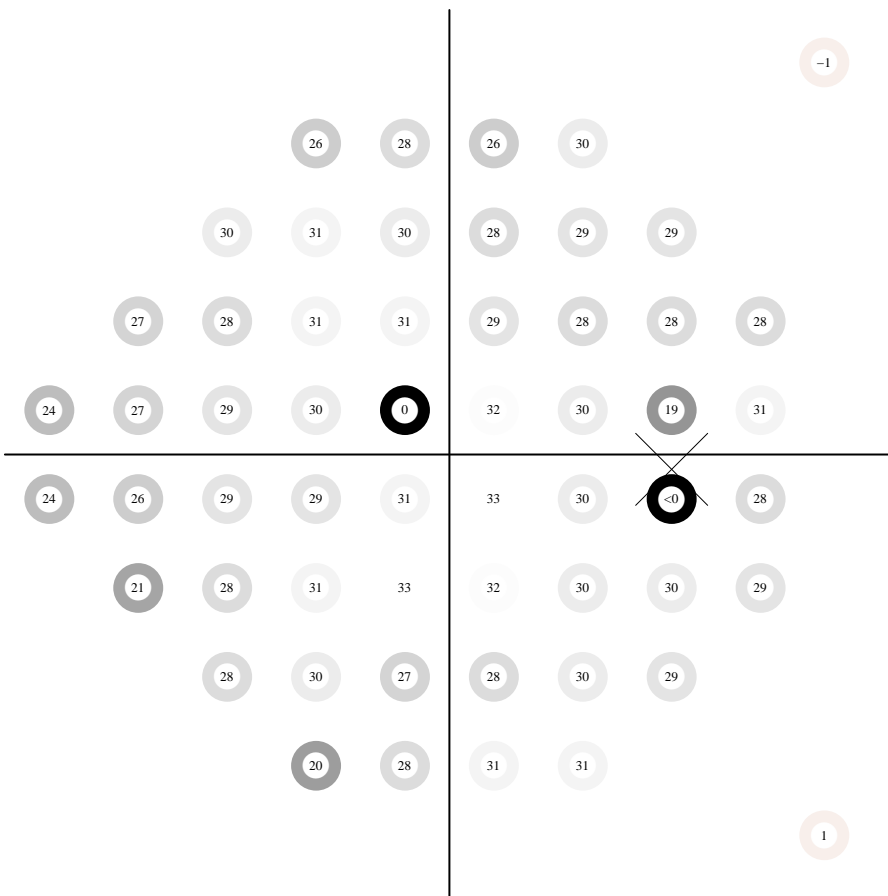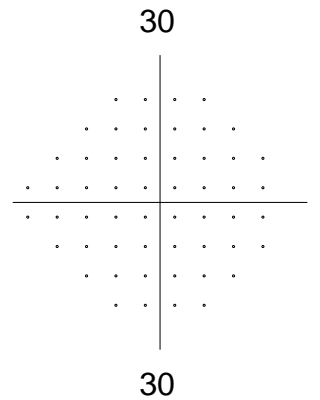

pattern deviation

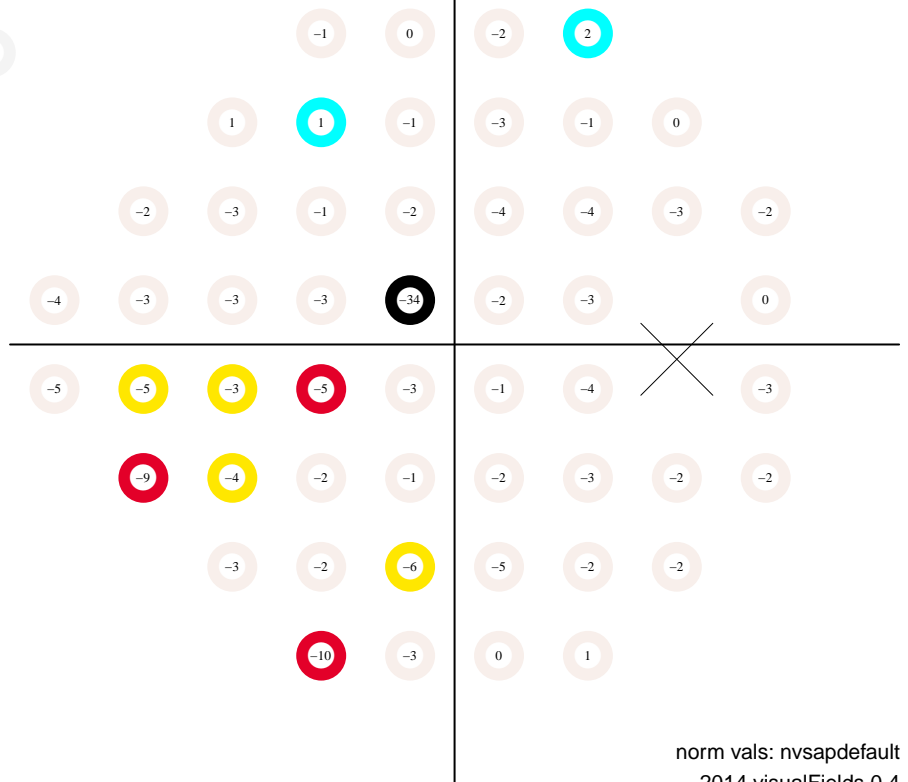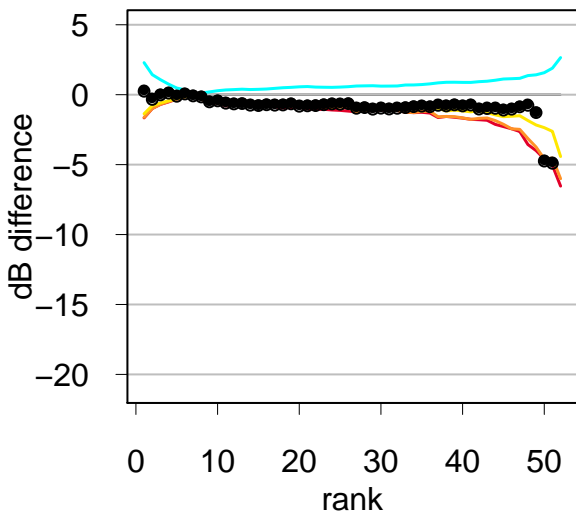

# Static Automated Perimetry. Single field analysis

Subject ID: 1015, age: 68, eye: OD (right)

Date: 03/26/2013 at 14:26

Duration: 04:57, pause: 00:00

false positives 0.0 %

false negatives 12.0 %

fixation losses 7.1 %

MS 28.8 dB

MD -1.1 dB (p < 95 %)

PSD 5.5 dB (p < 95 %)

VFI 92.8 % (p < 0.5 %)

GH 1.6 dB

total deviation

Central 24-2  
SITA standard

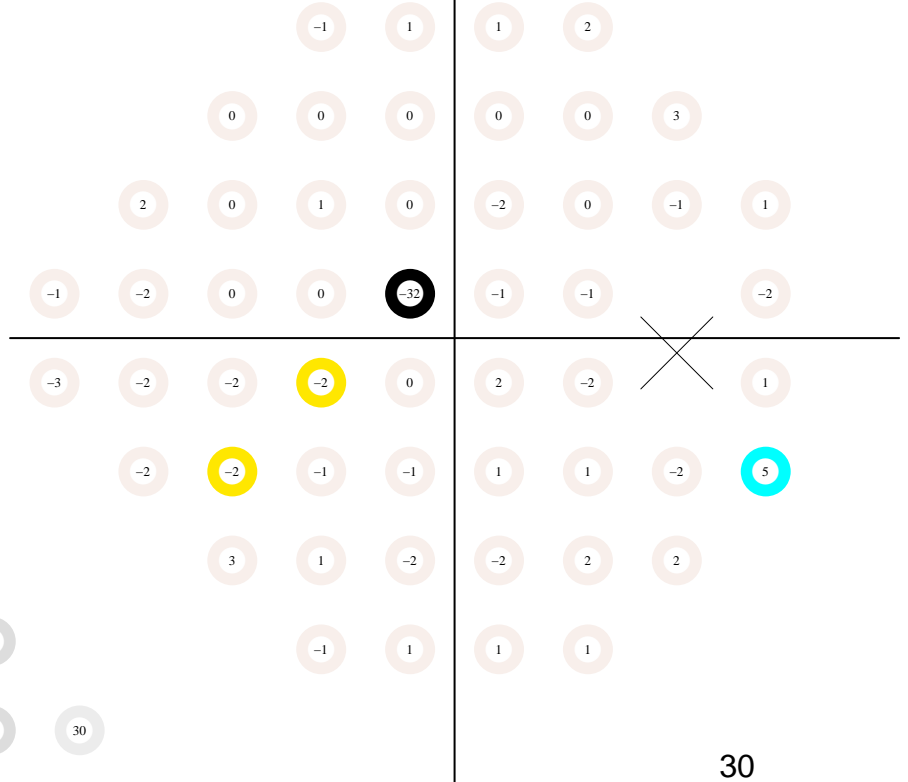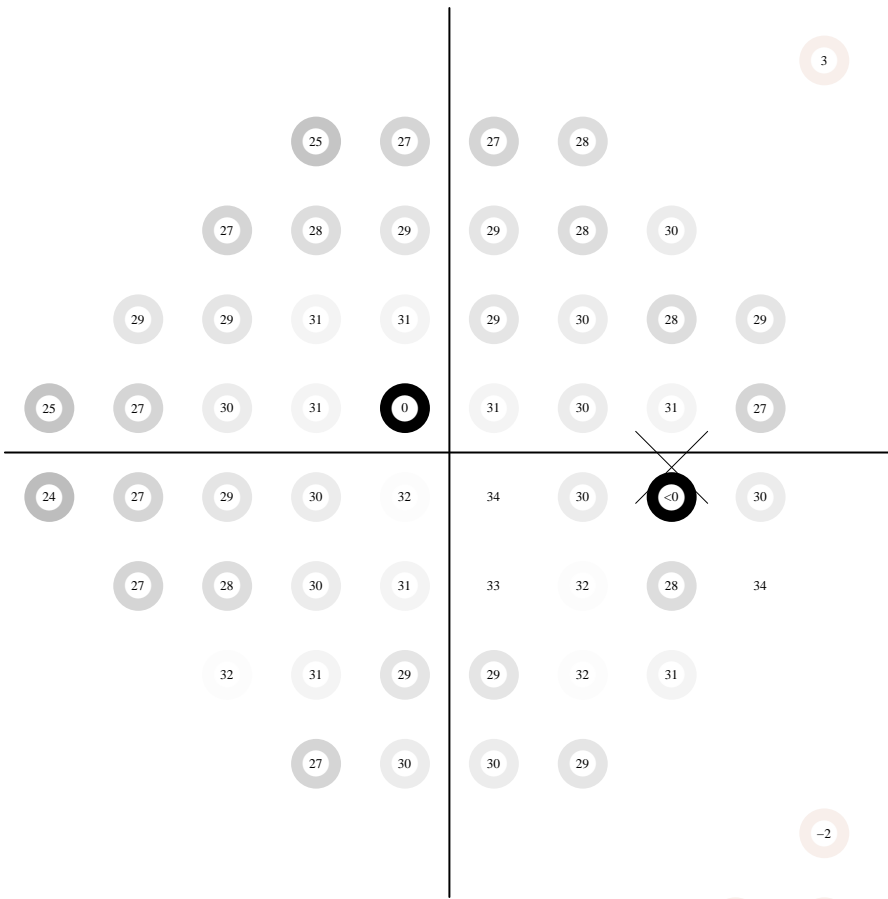

pattern deviation

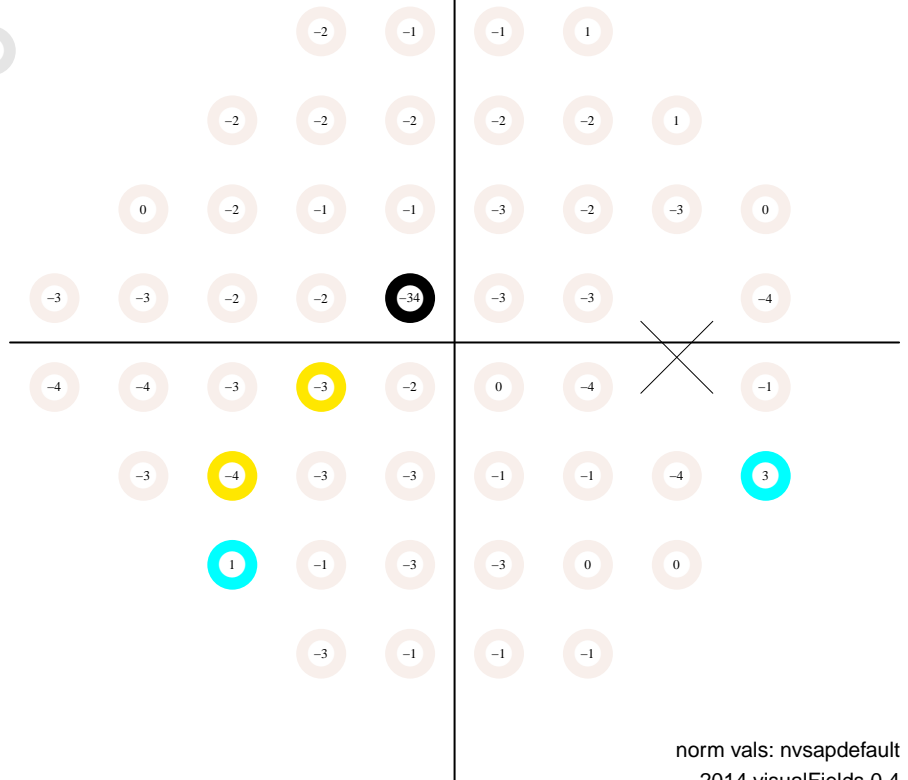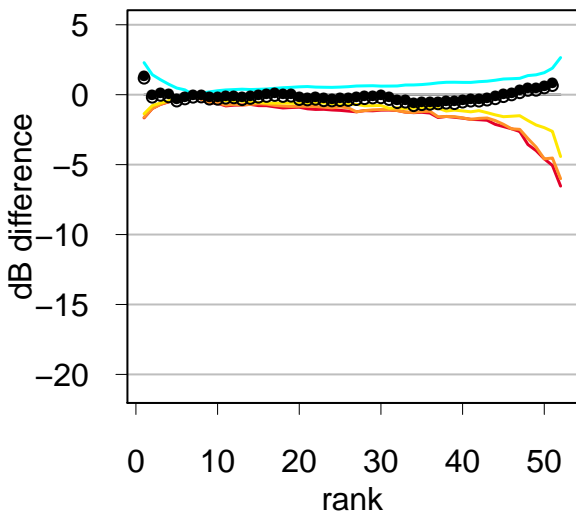

# Static Automated Perimetry. Single field analysis

Subject ID: 1017, age: 55, eye: OD (right)

Date: 08/14/2006 at 8:17:

Duration: 05:53, pause: 00:00

false positives 2.0 %

false negatives 0.0 %

fixation losses NA %

MS 29.3 dB

MD -1.4 dB (p < 95 %)

PSD 4.8 dB (p < 95 %)

VFI 96.2 % (p < 1 %)

GH 1.3 dB

total deviation

Central 24-2  
SITA standard

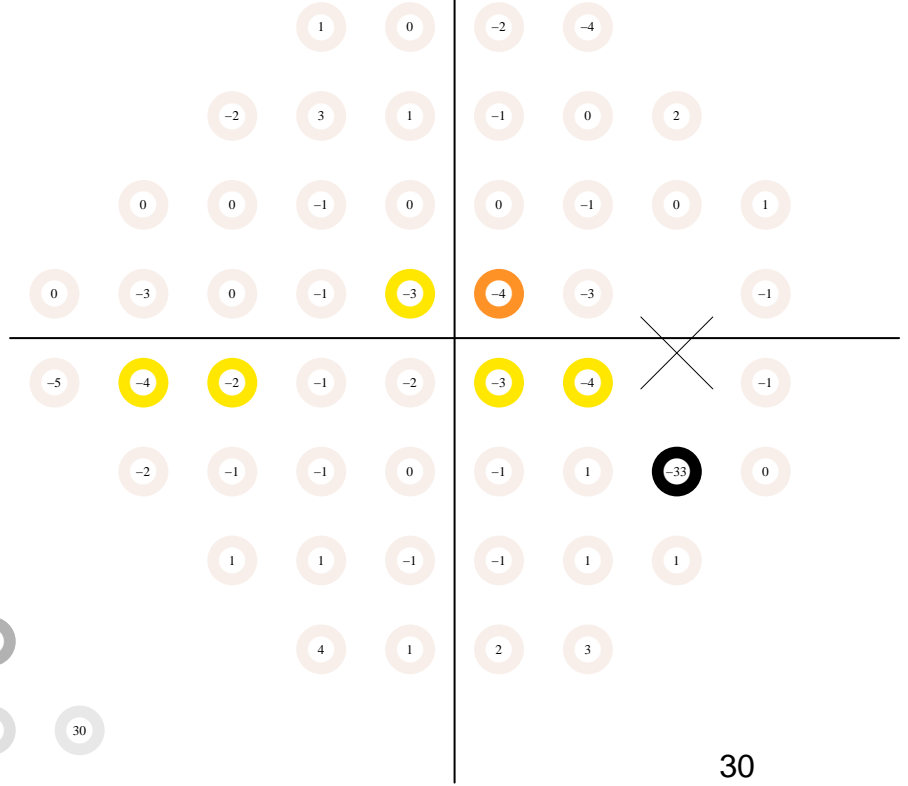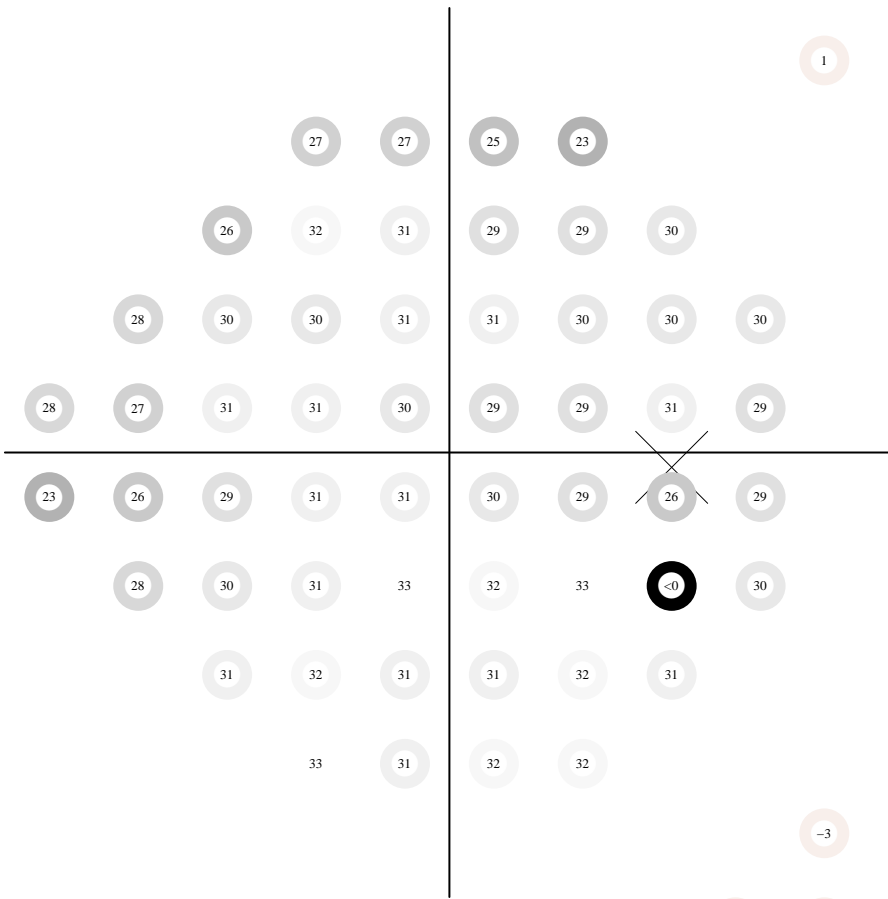

pattern deviation

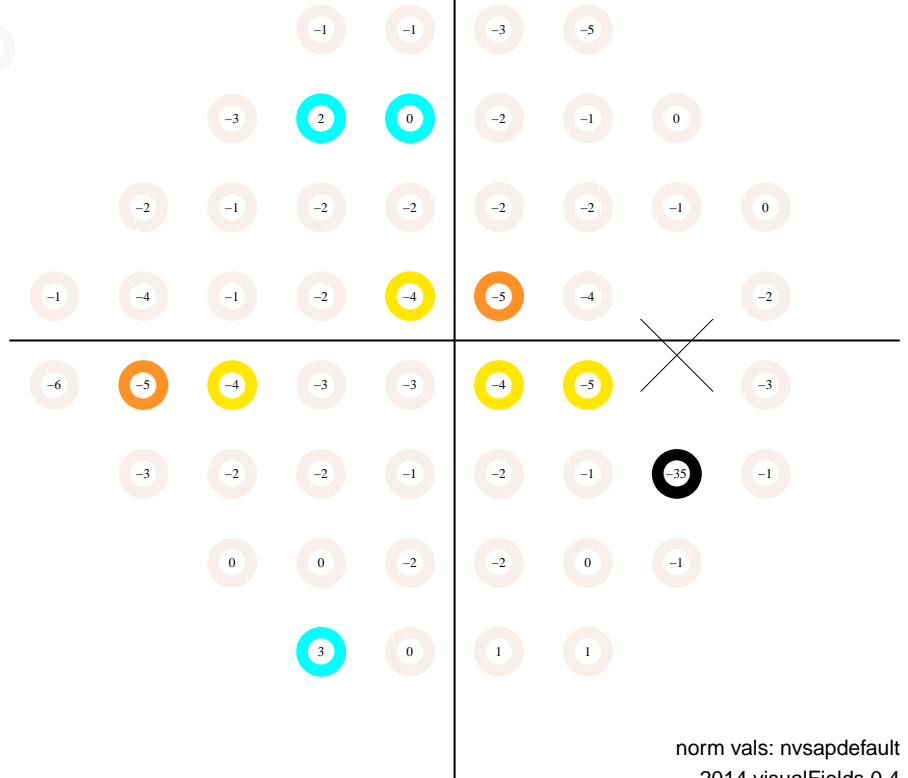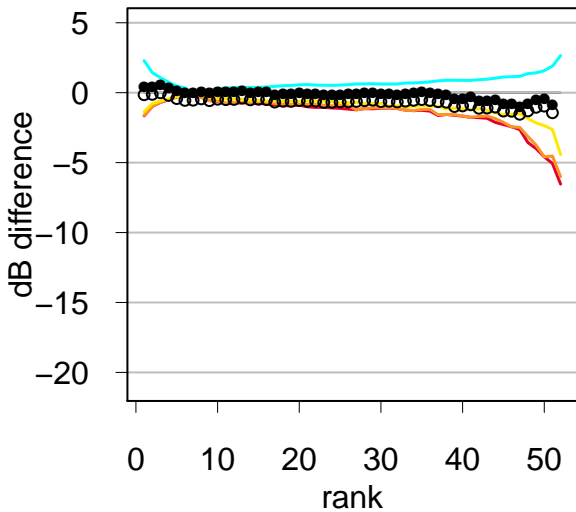

# Static Automated Perimetry. Single field analysis

Subject ID: 1017, age: 55, eye: OD (right)

Date: 02/27/2007 at 10:18

Duration: 04:30, pause: 00:00

false positives 3.0 %

false negatives 0.0 %

fixation losses 7.1 %

MS 30.3 dB

MD -0.3 dB (p < 95 %)

PSD 1.7 dB (p < 95 %)

VFI 99.0 % (p < 95 %)

GH 1.8 dB

total deviation

Central 24-2  
SITA standard

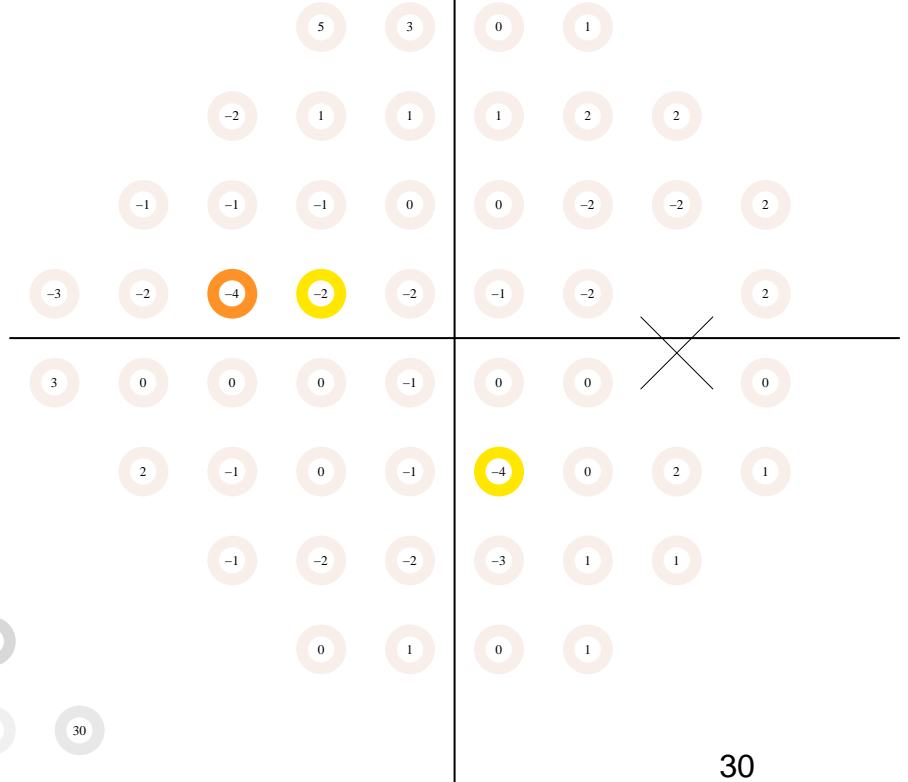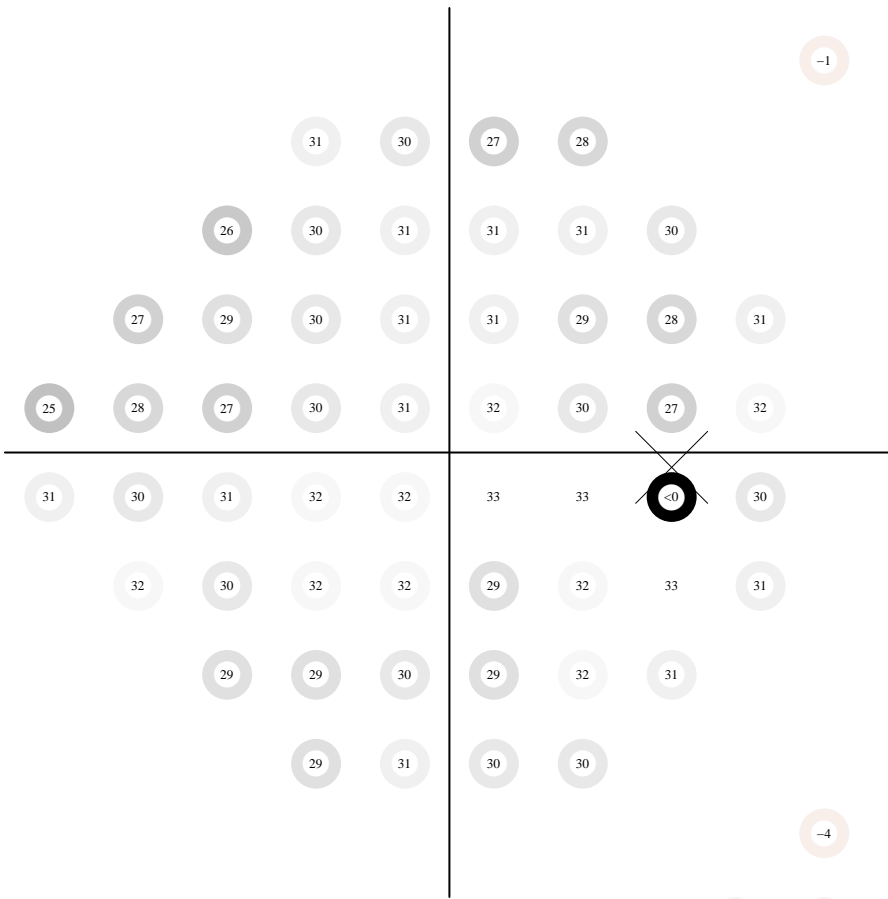

pattern deviation

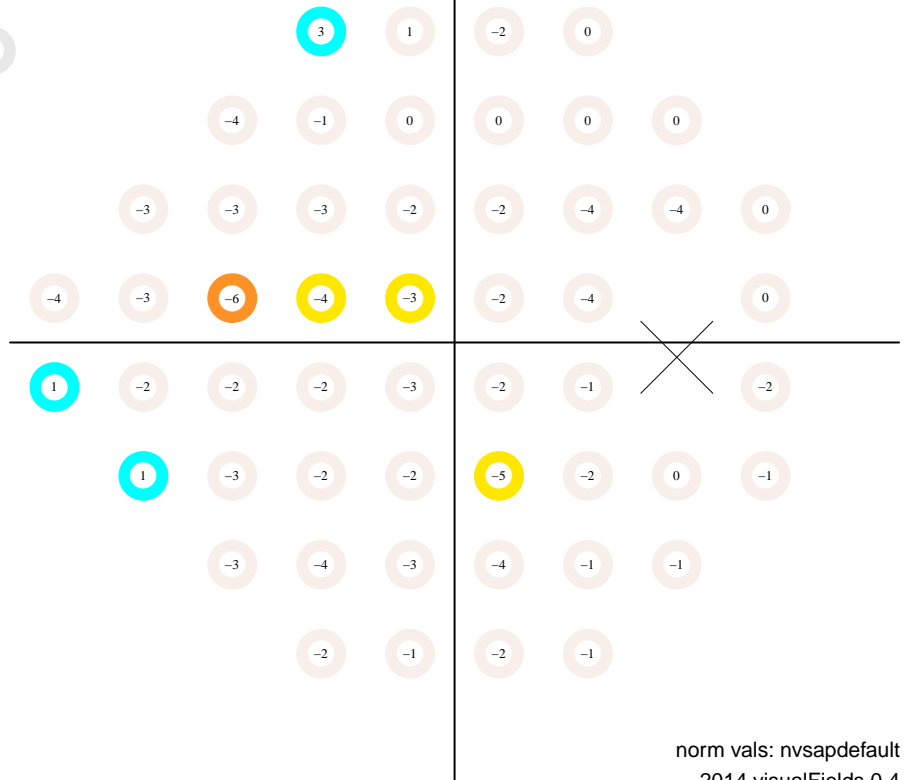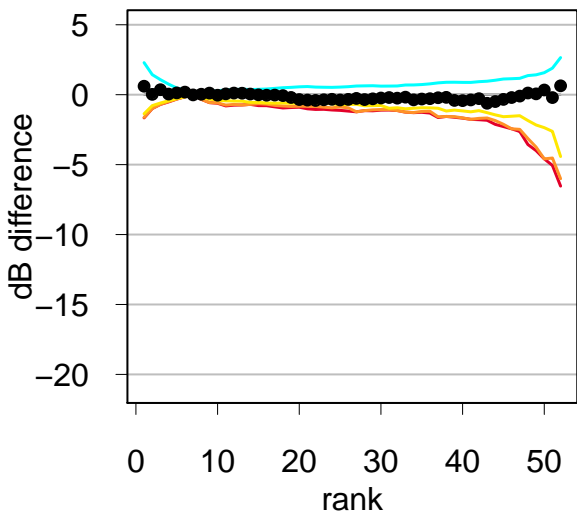



# Static Automated Perimetry. Single field analysis

Subject ID: 1017, age: 56, eye: OD (right)

Date: 08/07/2007 at 6:49:

Duration: 04:45, pause: 00:00

false positives 2.0 %

false negatives 0.0 %

fixation losses 0.0 %

MS 30.4 dB

MD -0.2 dB (p < 95 %)

PSD 2.0 dB (p < 95 %)

VFI 98.8 % (p < 95 %)

GH 2.0 dB

total deviation

Central 24-2  
SITA standard

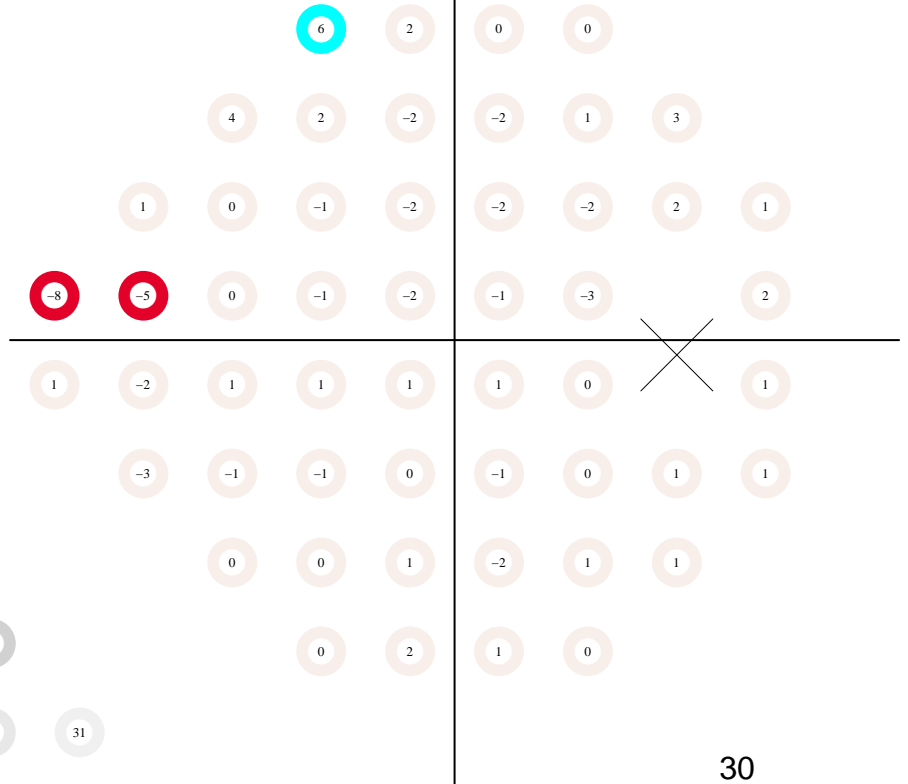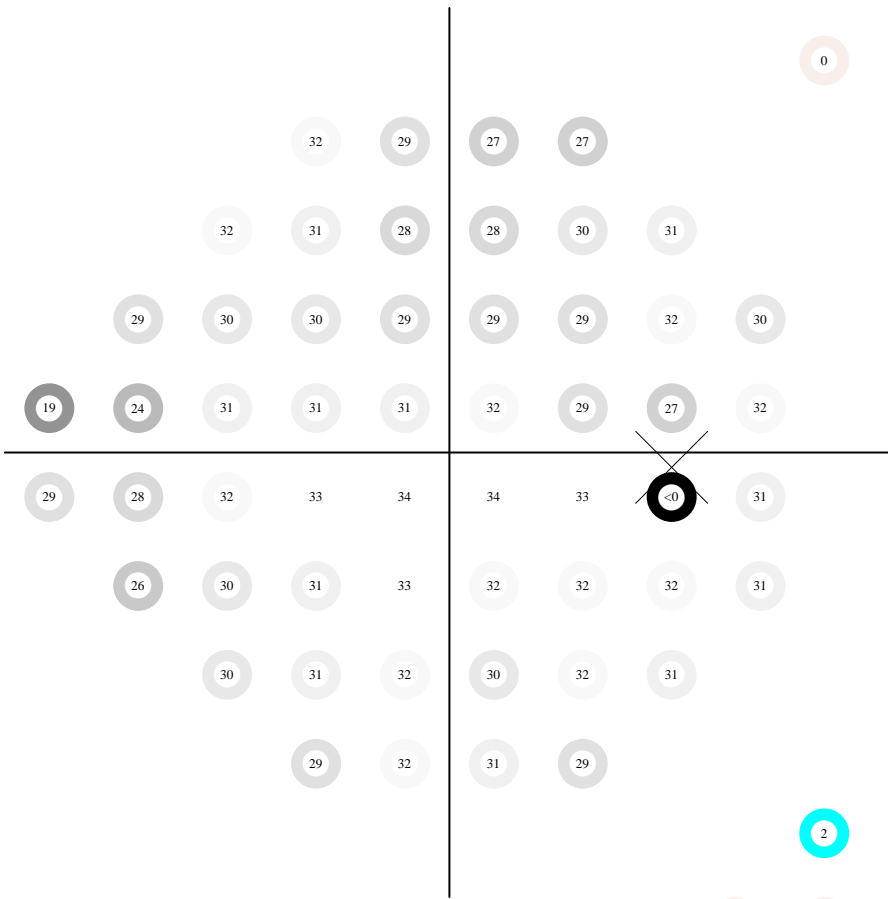

pattern deviation

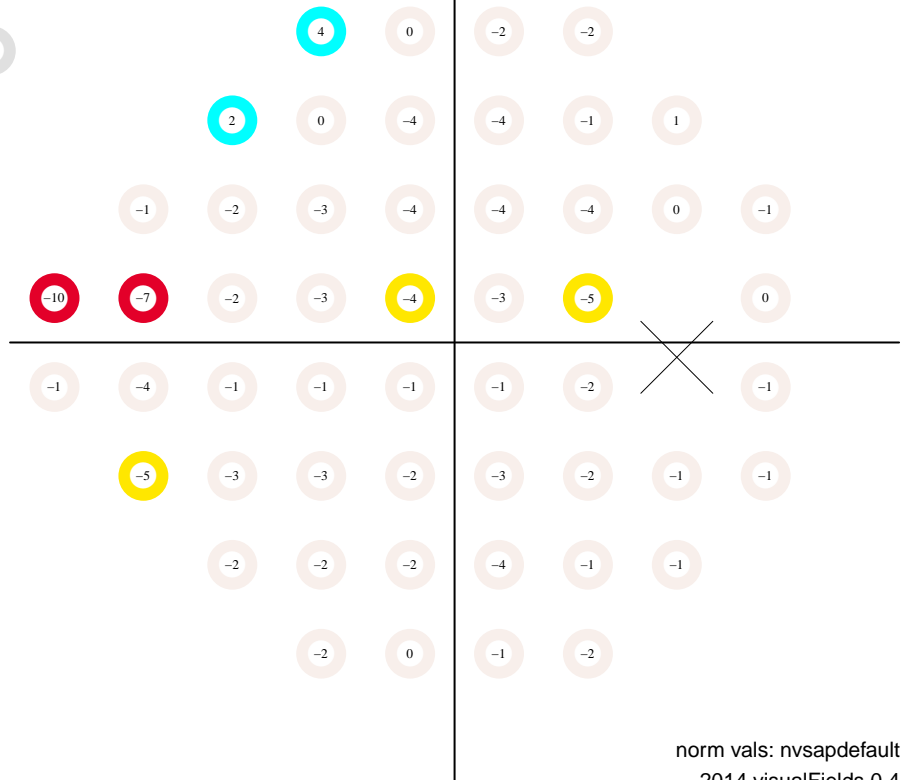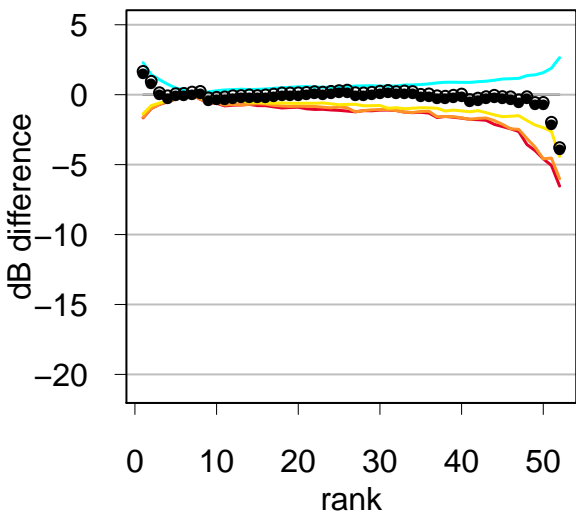

# Static Automated Perimetry. Single field analysis

Subject ID: 1017, age: 56, eye: OD (right)

Date: 10/08/2007 at 10:52

Duration: 04:08, pause: 00:00

false positives 0.0 %

false negatives 0.0 %

fixation losses 0.0 %

MS 30.5 dB

MD -0.1 dB (p < 95 %)

PSD 1.2 dB (p < 95 %)

VFI 99.6 % (p < 95 %)

GH 1.9 dB

total deviation

Central 24-2  
SITA standard

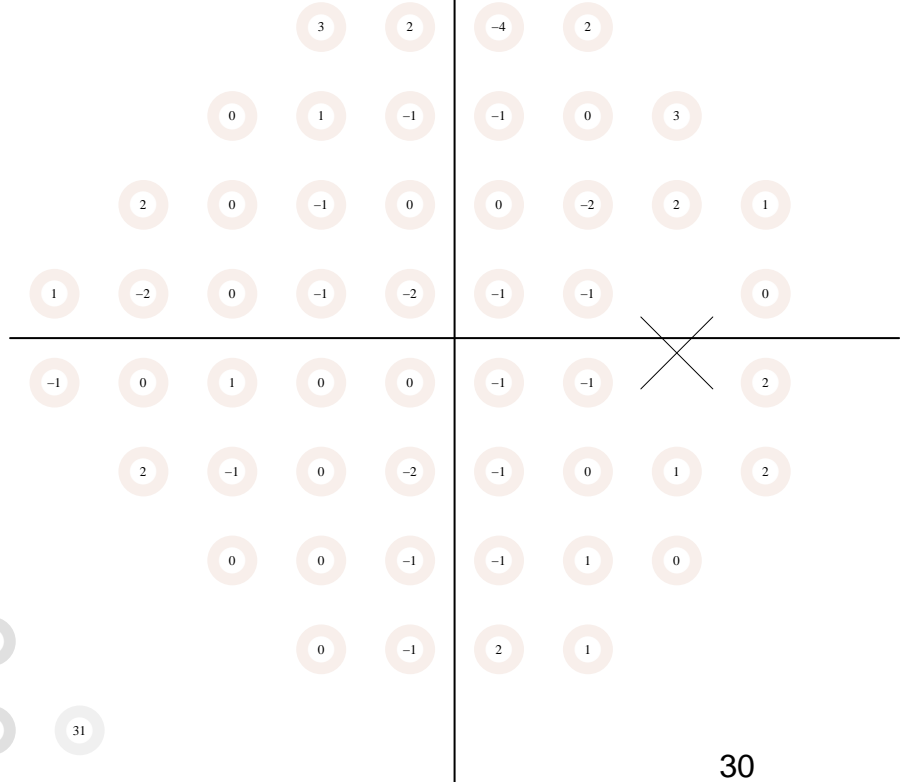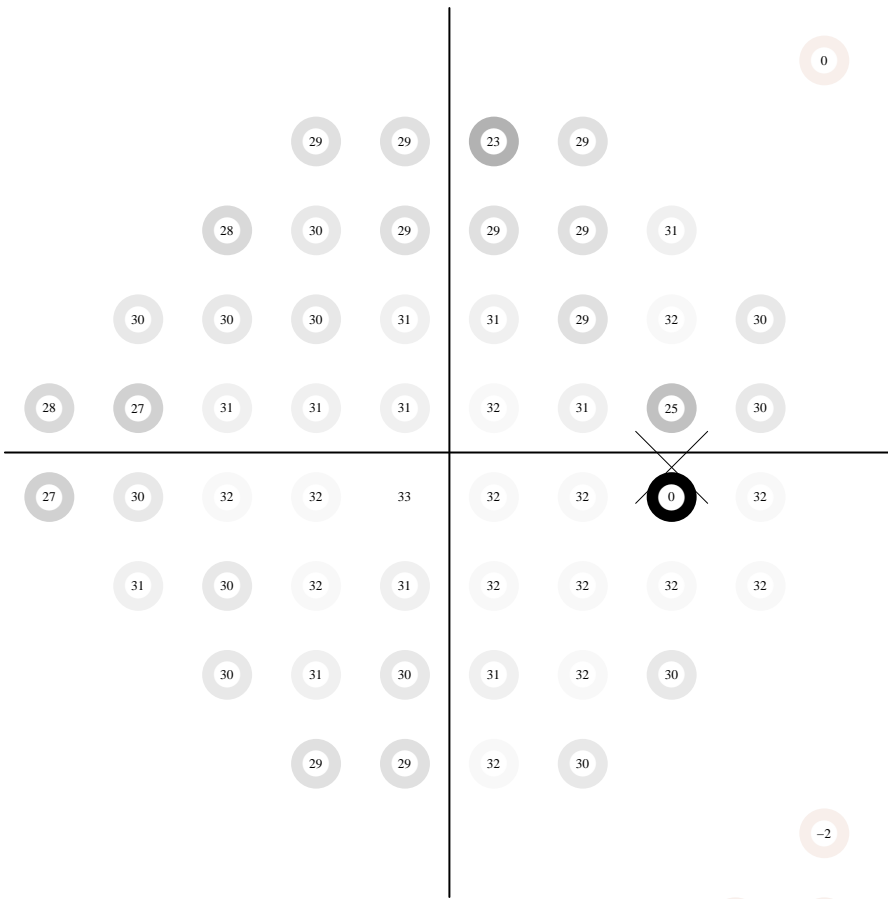

pattern deviation

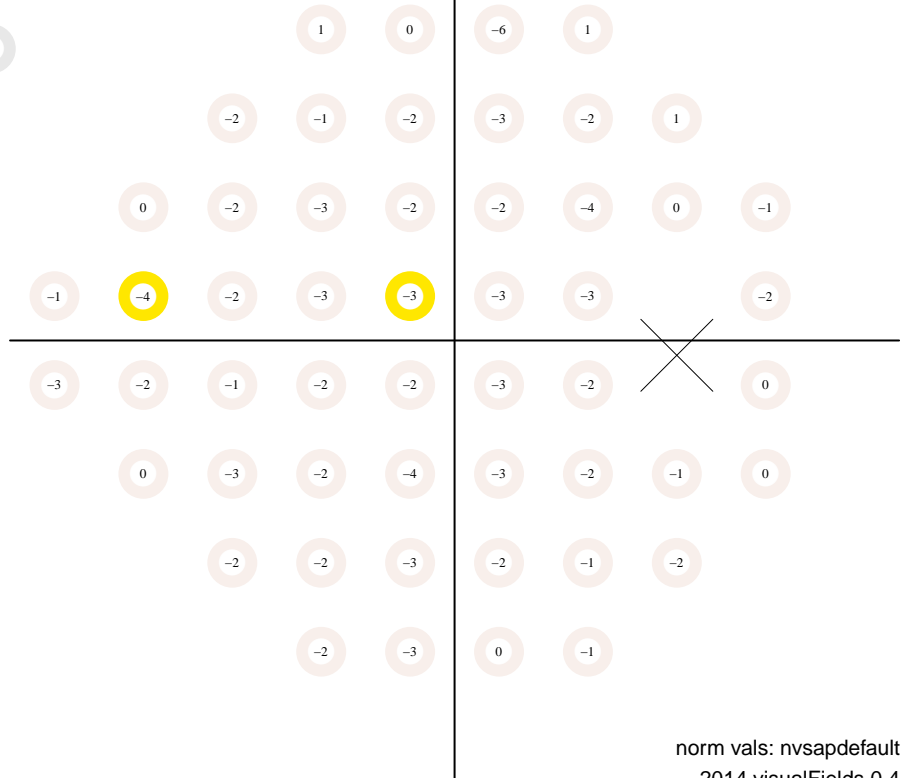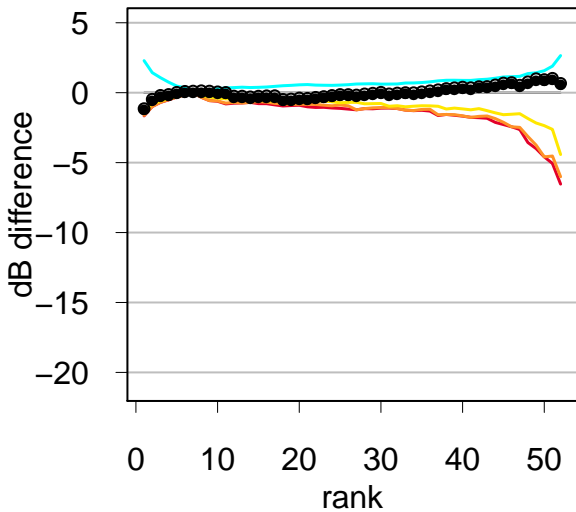



# Static Automated Perimetry. Single field analysis

Subject ID: 1017, age: 56, eye: OD (right)

Date: 02/05/2008 at 9:22:

Duration: 04:47, pause: 00:00

false positives 1.0 %

false negatives 0.0 %

fixation losses 0.0 %

MS 29.9 dB

MD -0.7 dB (p < 95 %)

PSD 1.5 dB (p < 95 %)

VFI 98.8 % (p < 95 %)

GH 1.3 dB

total deviation

Central 24-2  
SITA standard

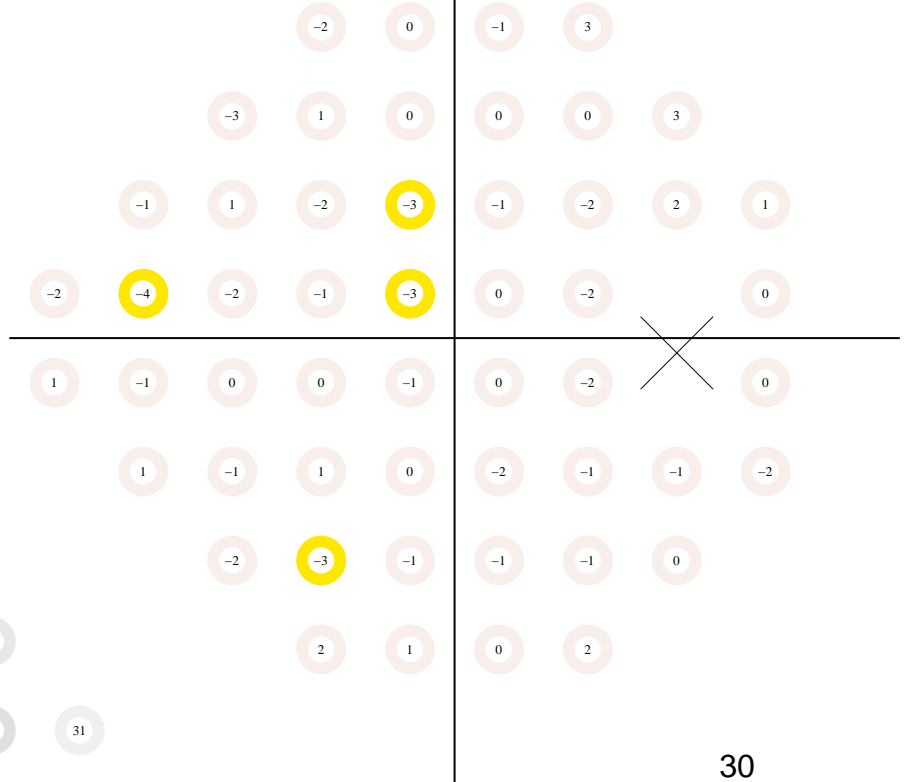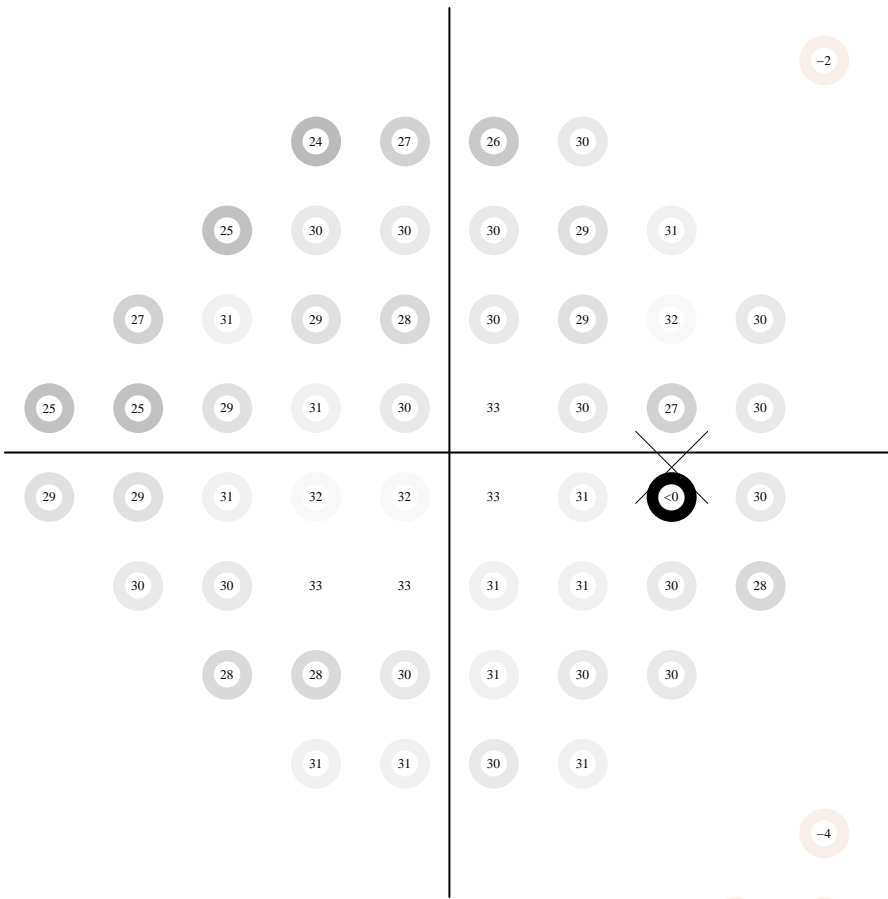

pattern deviation

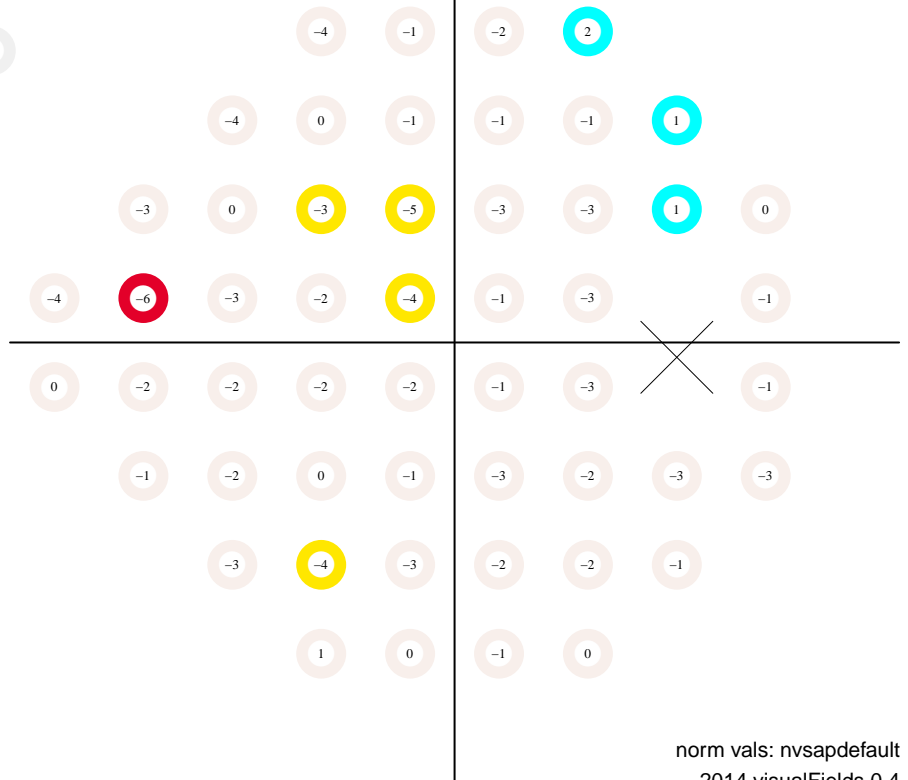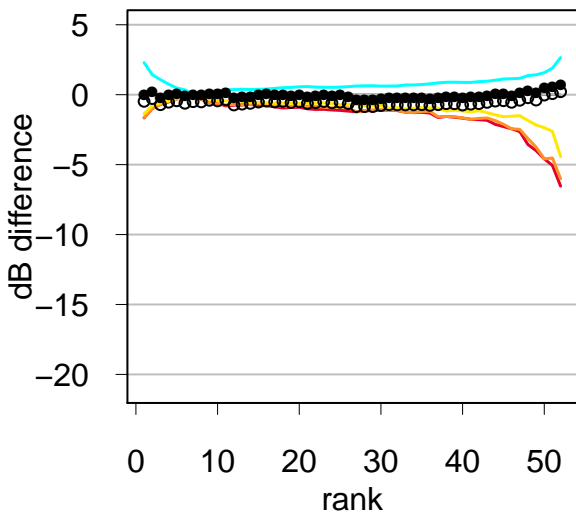

# Static Automated Perimetry. Single field analysis

Subject ID: 1017, age: 56, eye: OD (right)

Date: 02/06/2008 at 9:06:

Duration: 04:27, pause: 00:00

false positives 4.0 %

false negatives 0.0 %

fixation losses 0.0 %

MS 30.8 dB

MD 0.2 dB (p < 95 %)

PSD 1.7 dB (p < 95 %)

VFI 98.8 % (p < 95 %)

GH 2.2 dB

total deviation

Central 24-2  
SITA standard

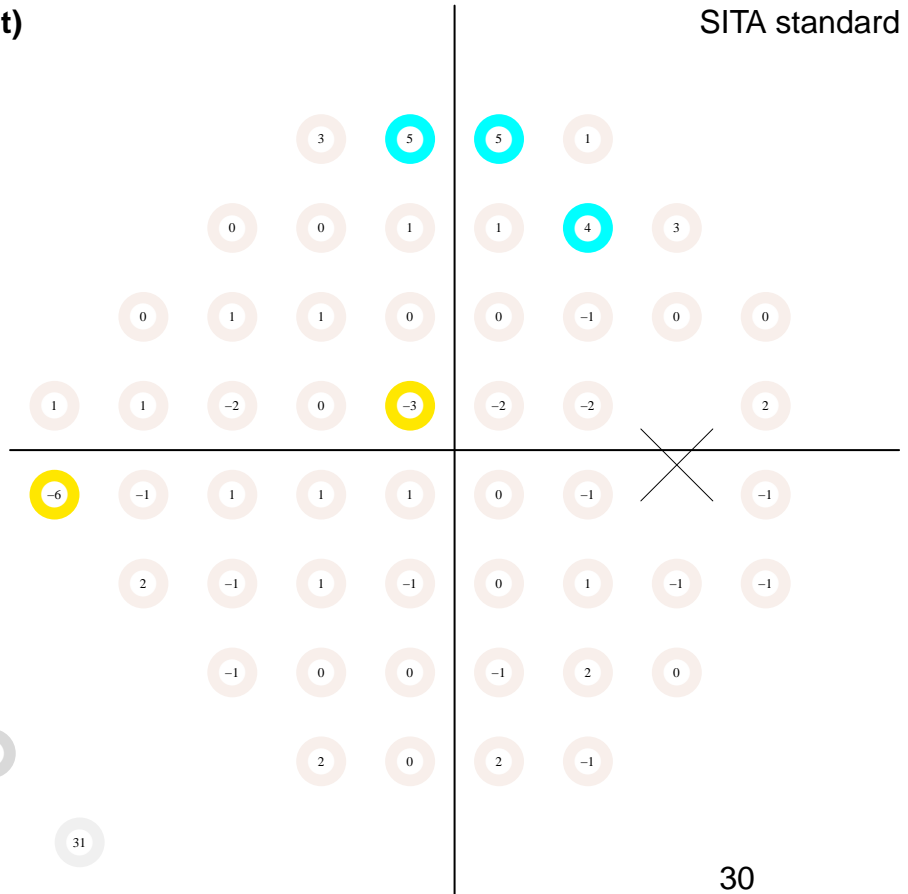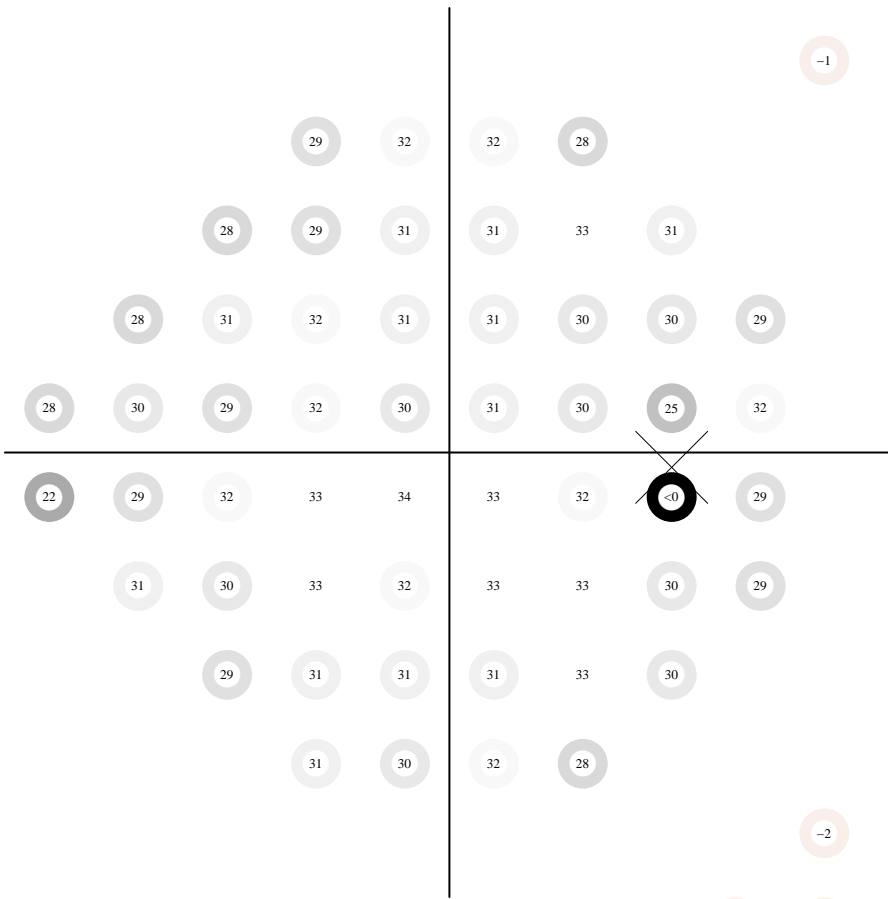

pattern deviation

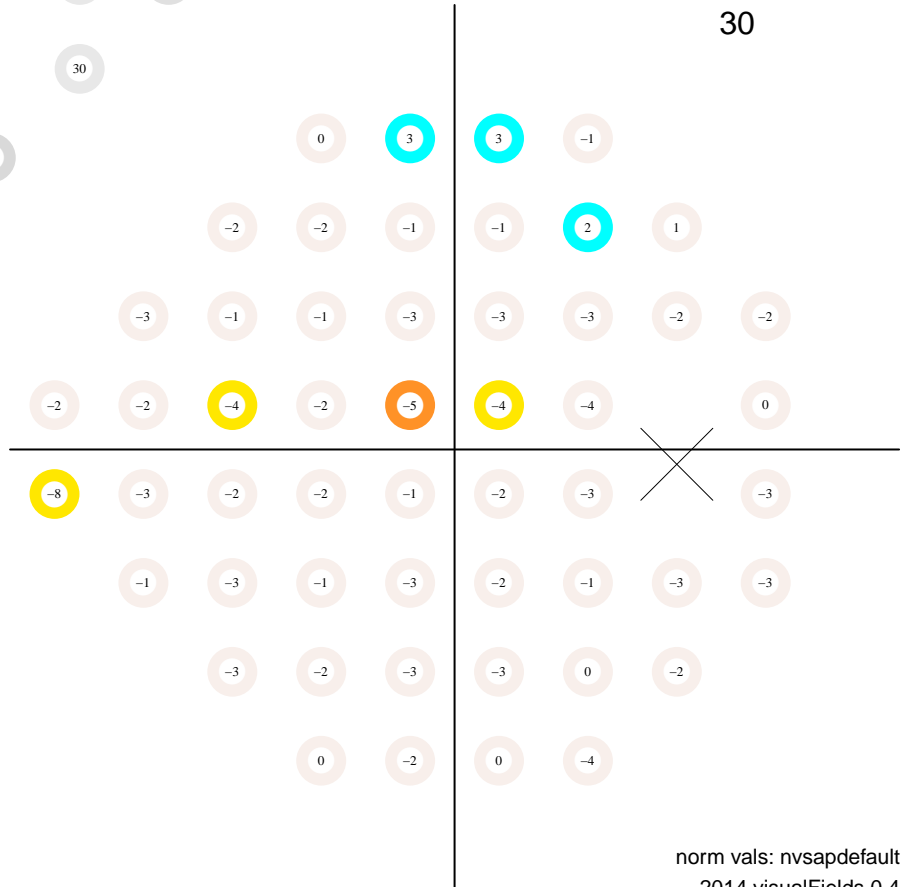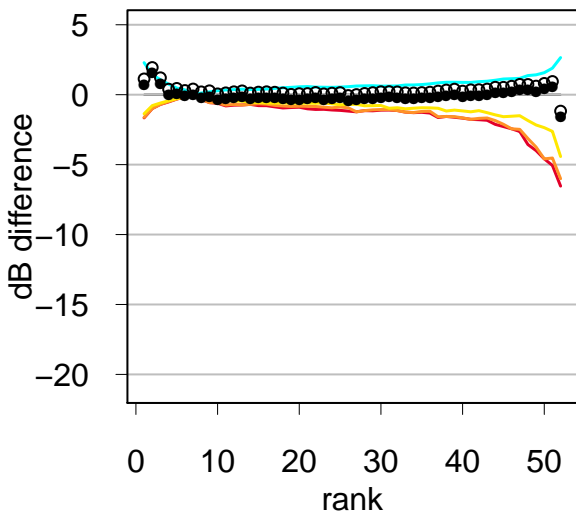

# Static Automated Perimetry. Single field analysis

Subject ID: 1017, age: 57, eye: OD (right)

Date: 08/04/2008 at 7:56:

Duration: 04:37, pause: 00:00

false positives 0.0 %

false negatives 0.0 %

fixation losses 0.0 %

MS 30.1 dB

MD -0.5 dB (p < 95 %)

PSD 2.3 dB (p < 95 %)

VFI 98.6 % (p < 95 %)

GH 2.3 dB

total deviation

Central 24-2  
SITA standard

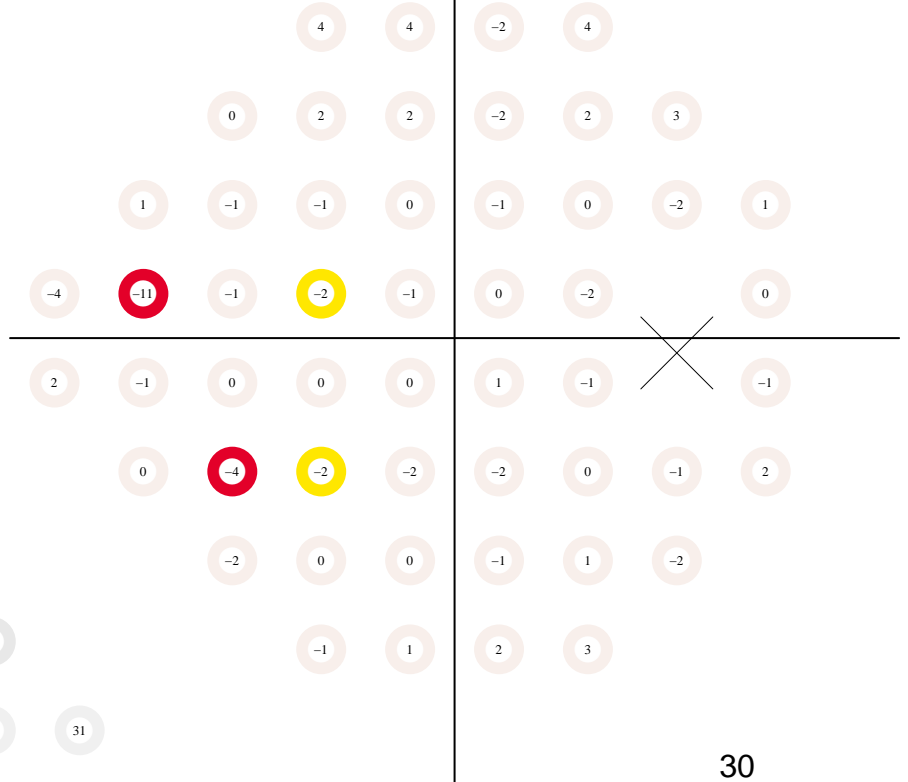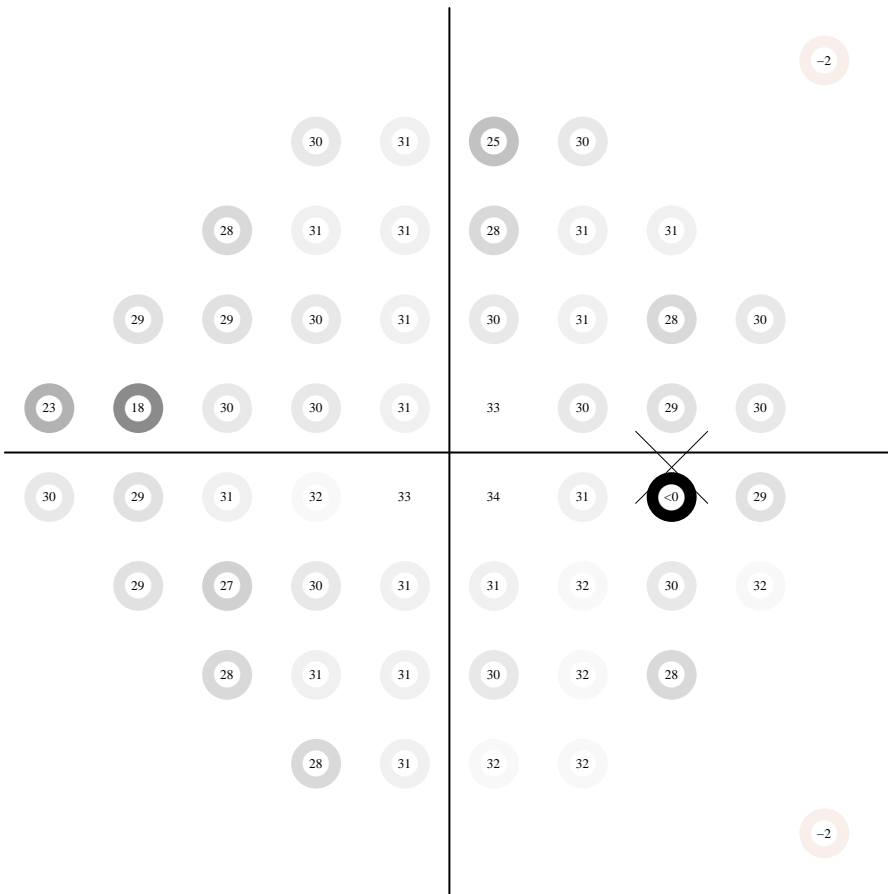

pattern deviation

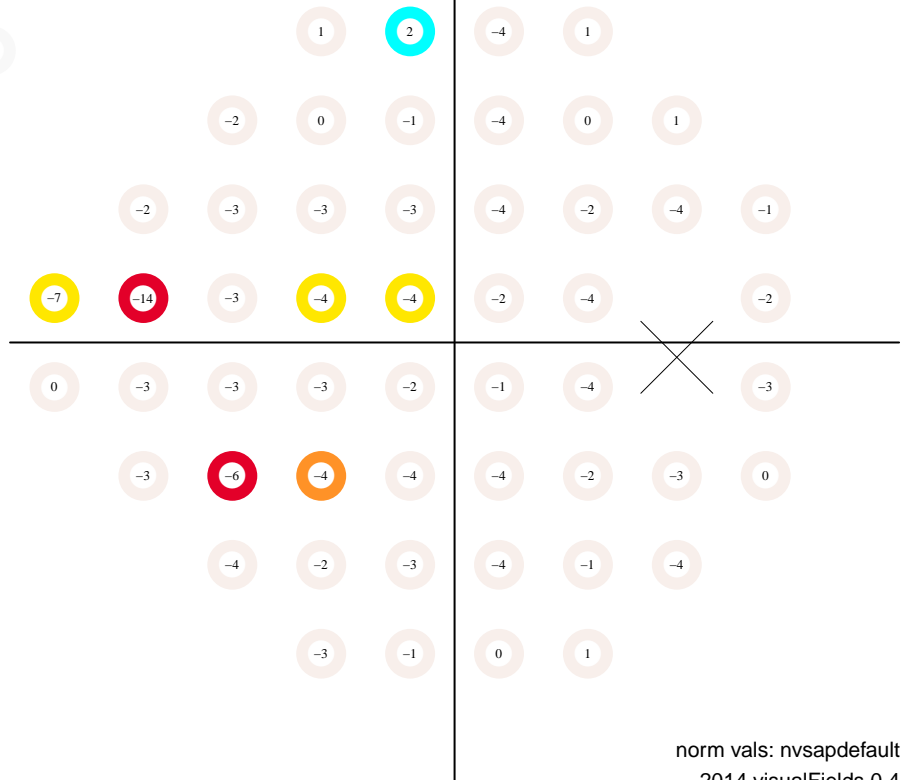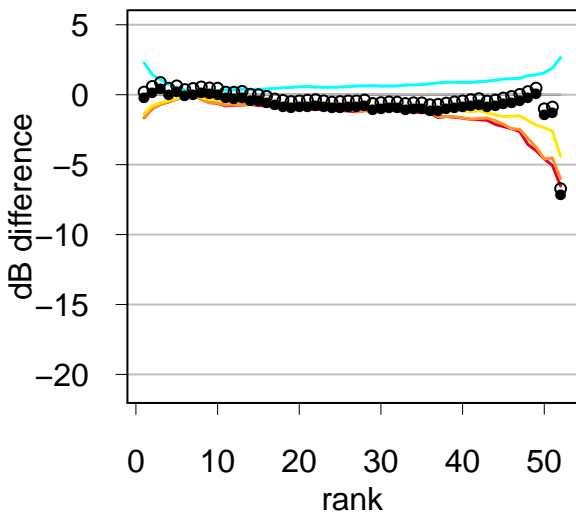



# Static Automated Perimetry. Single field analysis

Subject ID: 1017, age: 57, eye: OD (right)

Date: 02/10/2009 at 9:22:

Duration: 04:50, pause: 00:00

false positives 2.0 %

false negatives 0.0 %

fixation losses 0.0 %

MS 29.7 dB

MD -0.8 dB (p < 95 %)

PSD 1.7 dB (p < 95 %)

VFI 98.0 % (p < 95 %)

GH 1.7 dB

total deviation

Central 24-2  
SITA standard

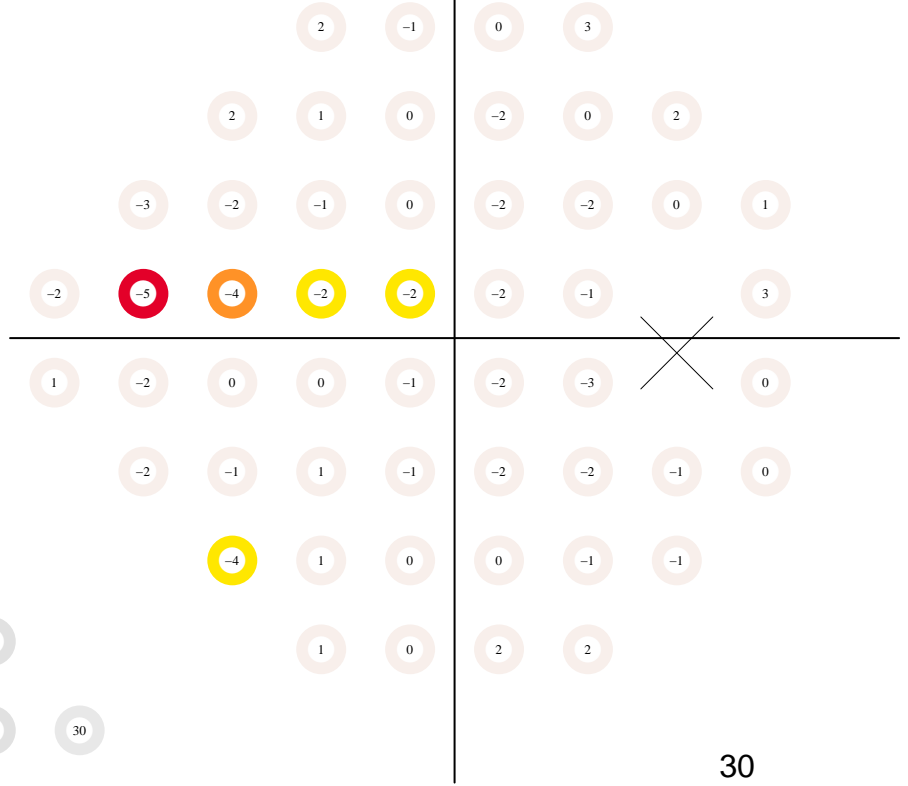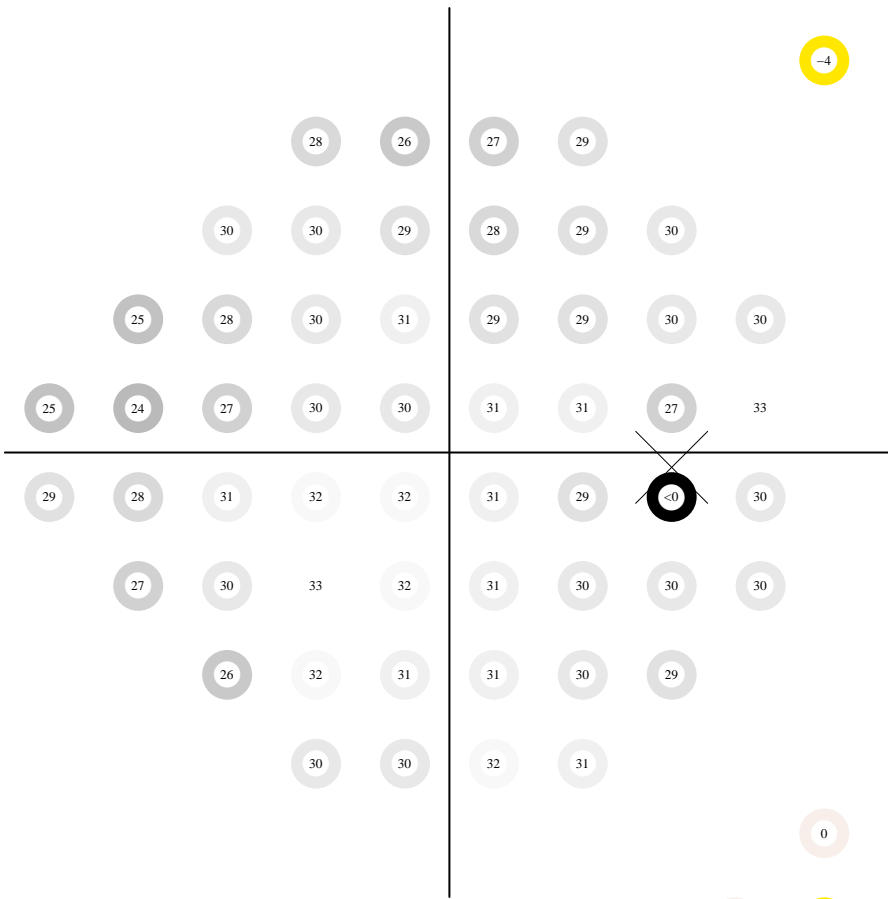

pattern deviation

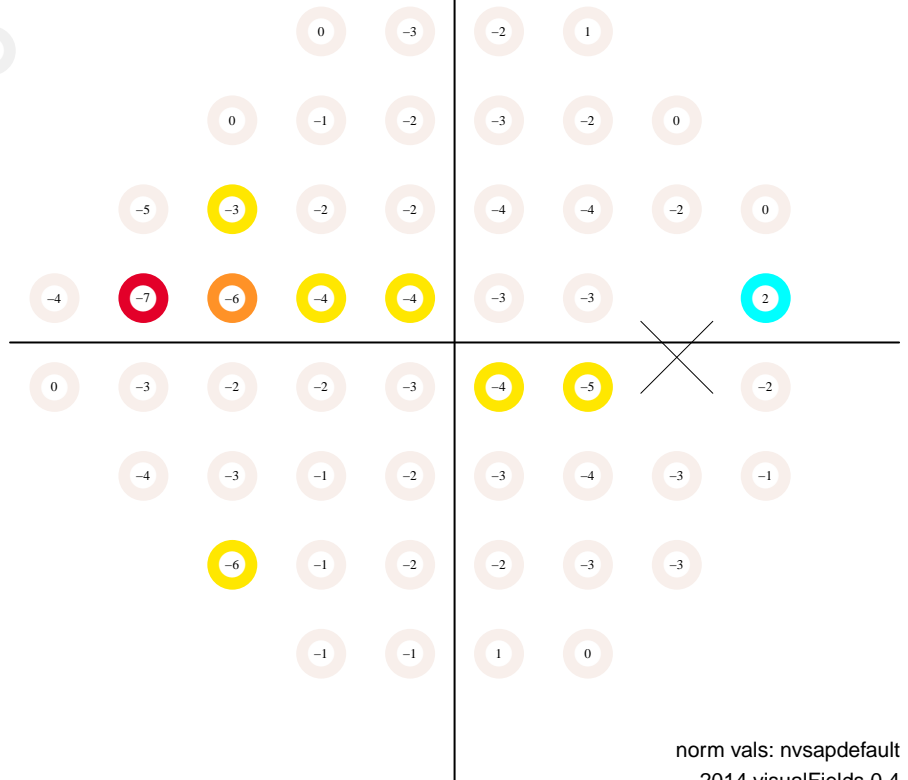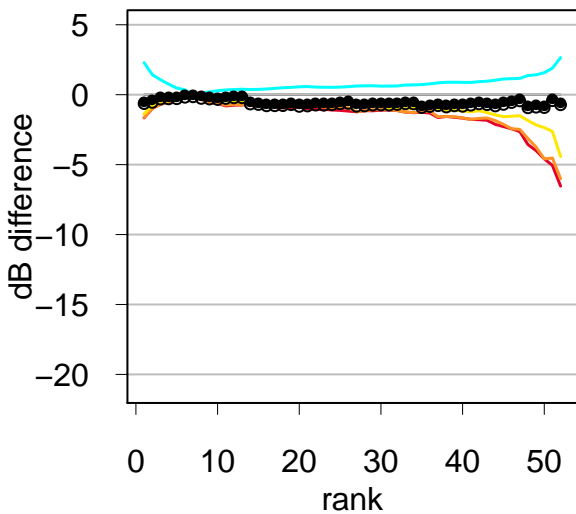



# Static Automated Perimetry. Single field analysis

Subject ID: 1017, age: 58, eye: OD (right)

Date: 02/05/2010 at 7:51:

Duration: 04:36, pause: 00:00

false positives 2.0 %

false negatives 0.0 %

fixation losses 0.0 %

MS 30.3 dB

MD -0.2 dB (p < 95 %)

PSD 1.3 dB (p < 95 %)

VFI 100.0 % (p < 95 %)

GH 1.7 dB

total deviation

Central 24-2  
SITA standard

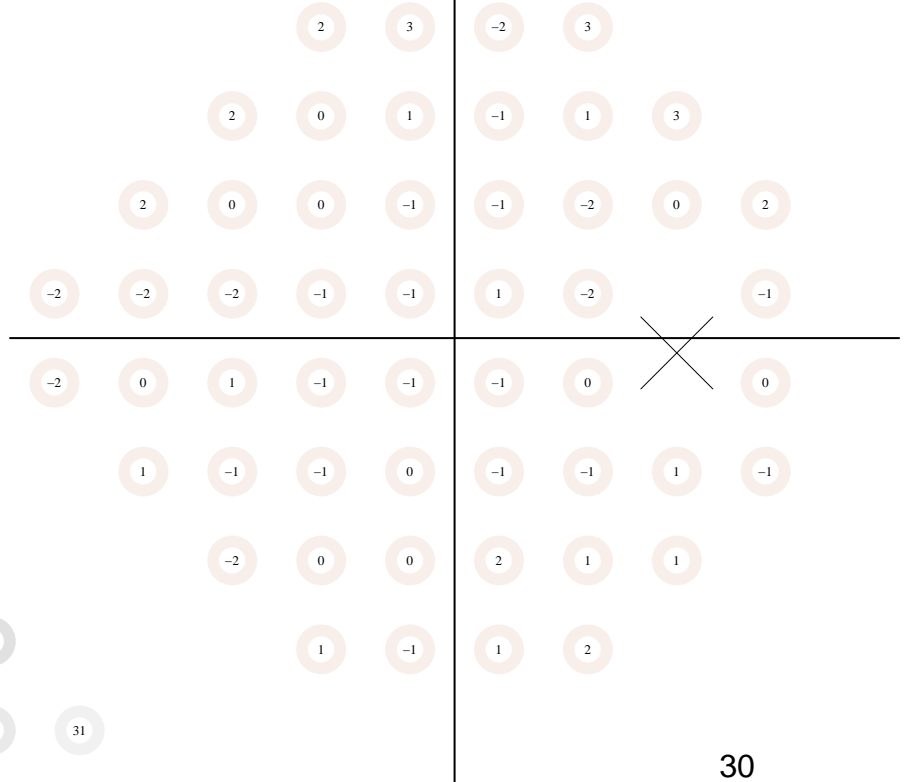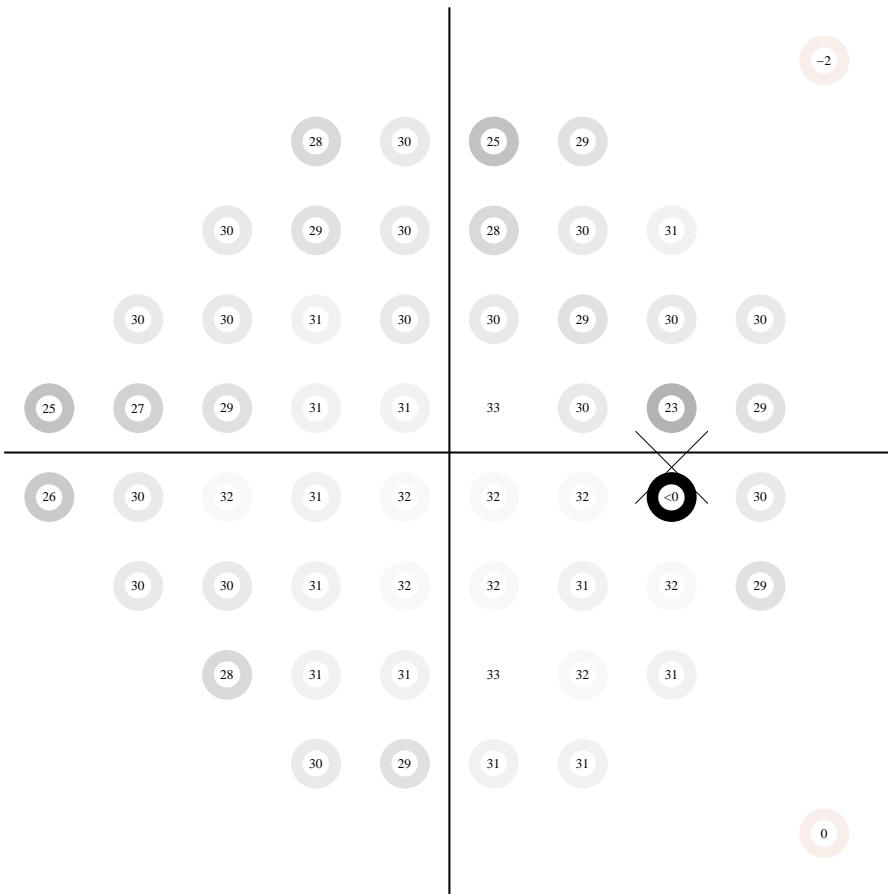

pattern deviation

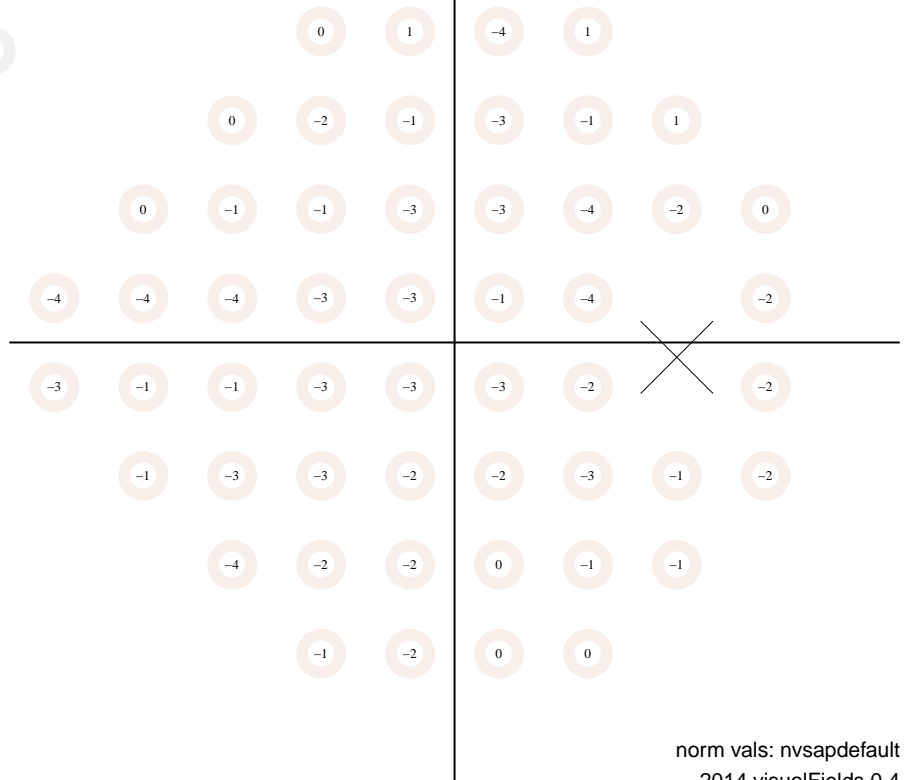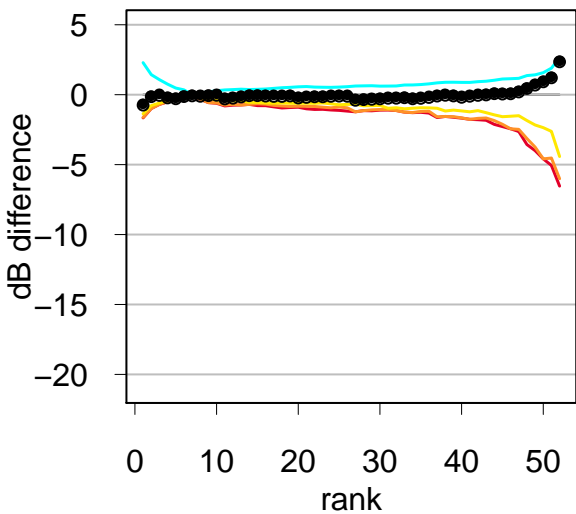

# Static Automated Perimetry. Single field analysis

Subject ID: 1017, age: 59, eye: OD (right)

Date: 08/18/2010 at 7:59:

Duration: 04:32, pause: 00:00

false positives 1.0 %

false negatives 0.0 %

fixation losses 14.3 %

MS 29.9 dB

MD -0.6 dB (p < 95 %)

PSD 1.9 dB (p < 95 %)

VFI 99.0 % (p < 95 %)

GH 1.5 dB

total deviation

Central 24-2  
SITA standard

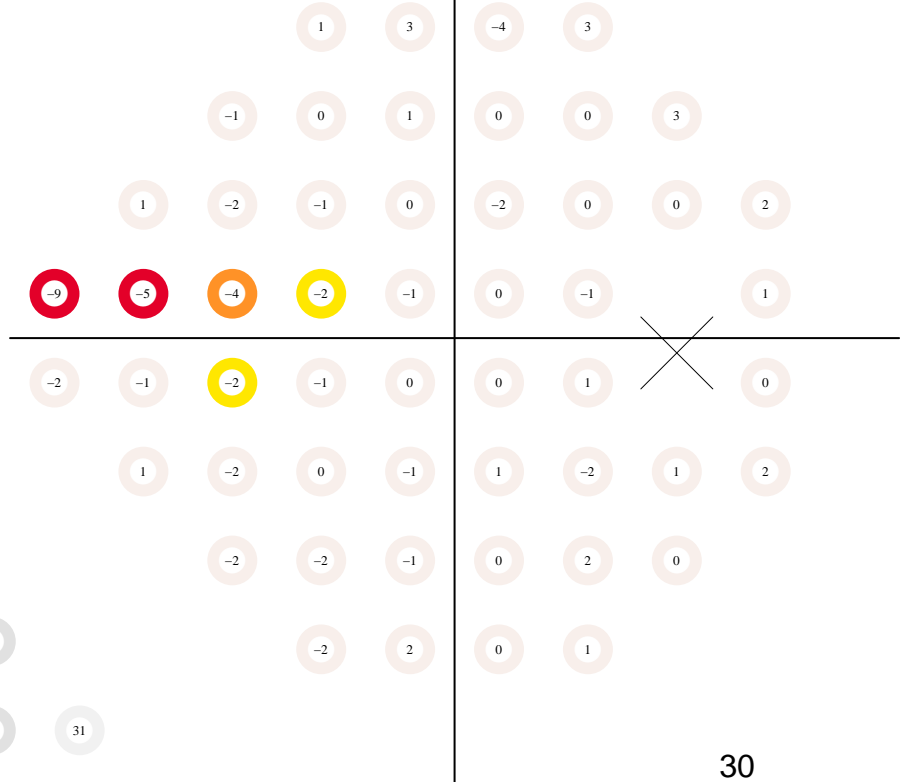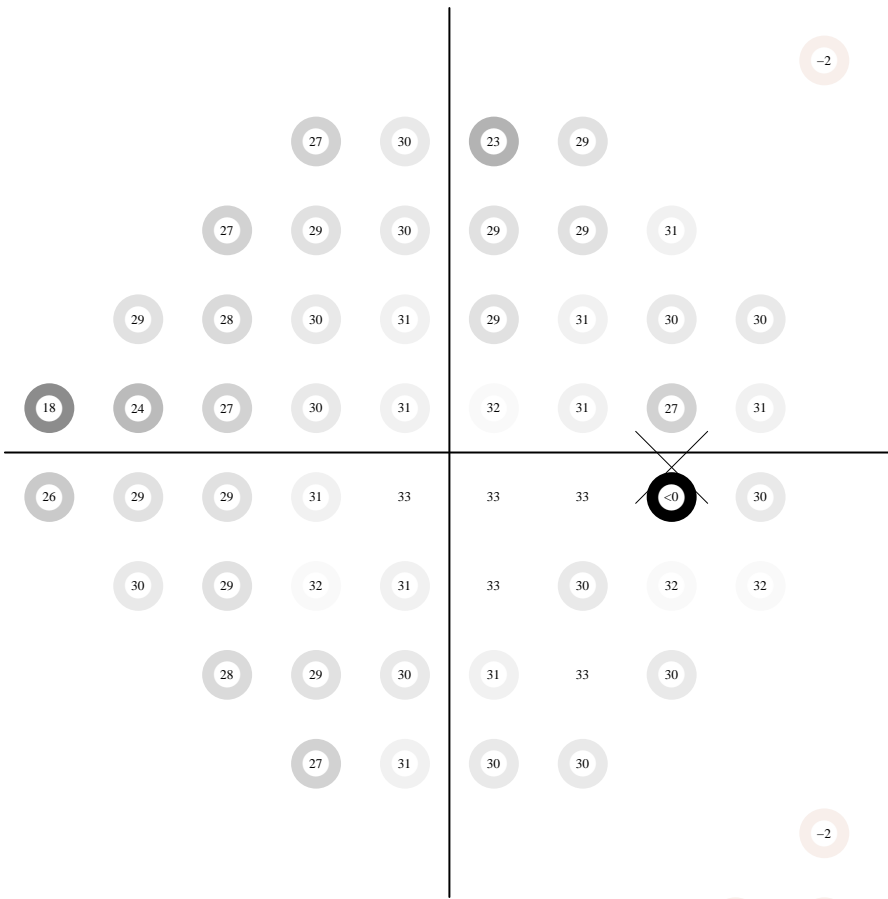

pattern deviation

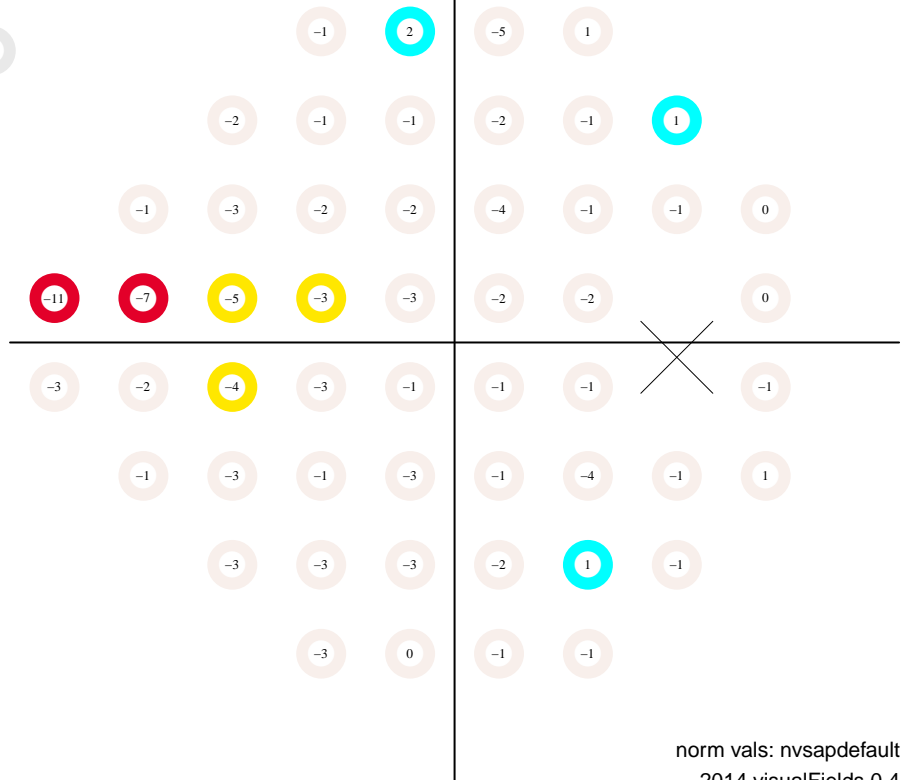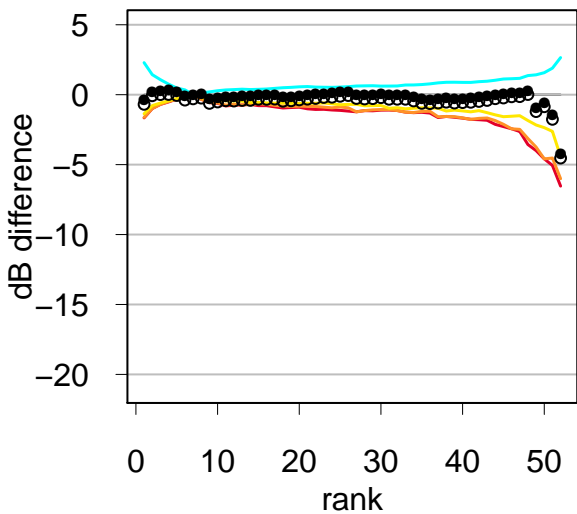



# Static Automated Perimetry. Single field analysis

Subject ID: 1017, age: 60, eye: OD (right)

Date: 08/11/2011 at 7:06:

Duration: 04:19, pause: 00:00

false positives 0.0 %

false negatives 0.0 %

fixation losses 7.7 %

MS 30.6 dB

MD 0.3 dB (p < 95 %)

PSD 1.7 dB (p < 95 %)

VFI 99.0 % (p < 95 %)

GH 2.5 dB

total deviation

Central 24-2  
SITA standard

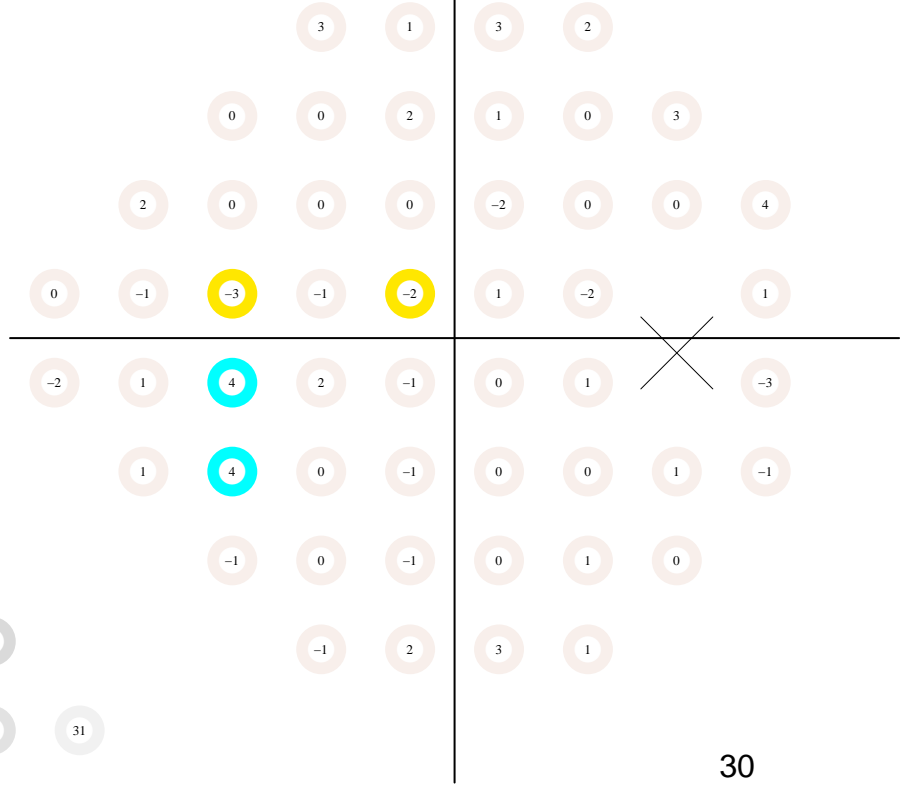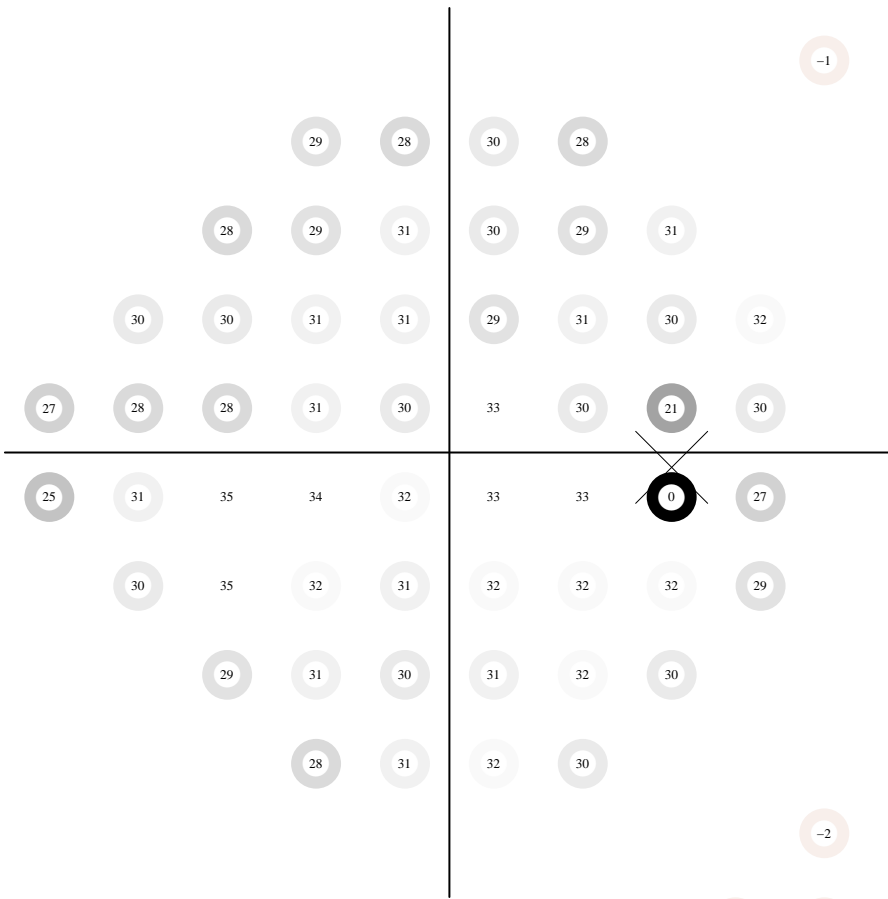

pattern deviation

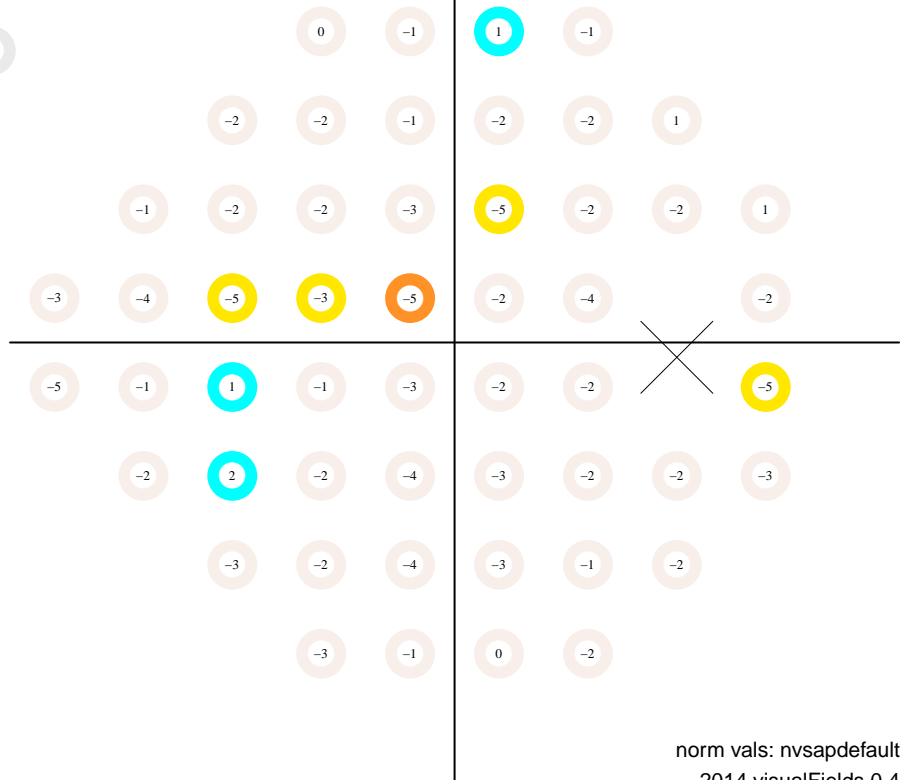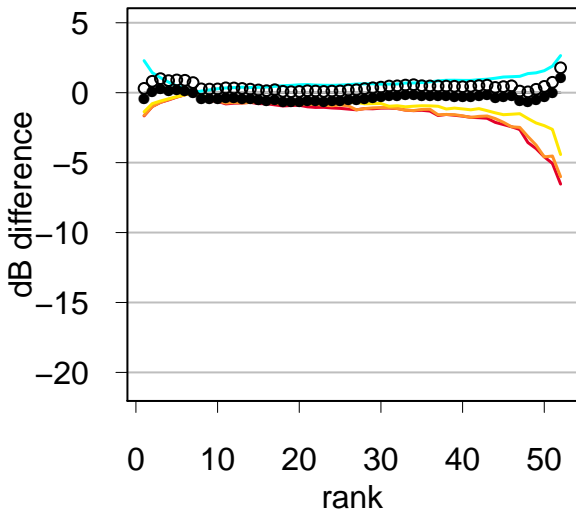

# Static Automated Perimetry. Single field analysis

Subject ID: 1017, age: 60, eye: OD (right)

Date: 08/29/2011 at 7:46:

Duration: 04:46, pause: 00:00

false positives 1.0 %

false negatives 4.0 %

fixation losses 0.0 %

MS 30.0 dB

MD -0.3 dB (p < 95 %)

PSD 2.2 dB (p < 95 %)

VFI 98.1 % (p < 95 %)

GH 2.1 dB

total deviation

Central 24-2  
SITA standard

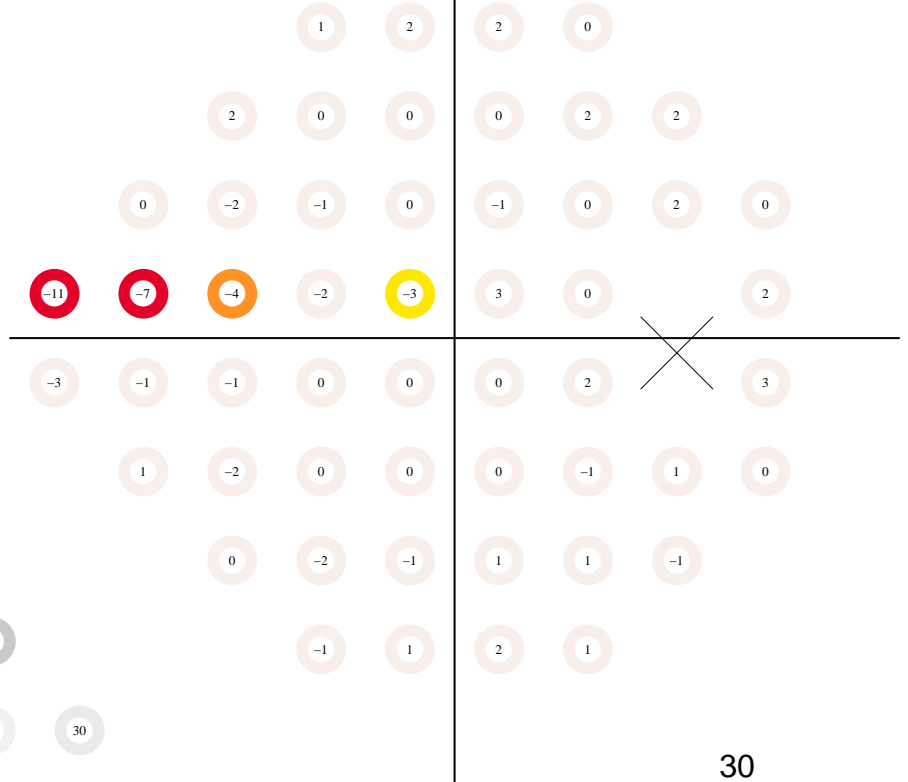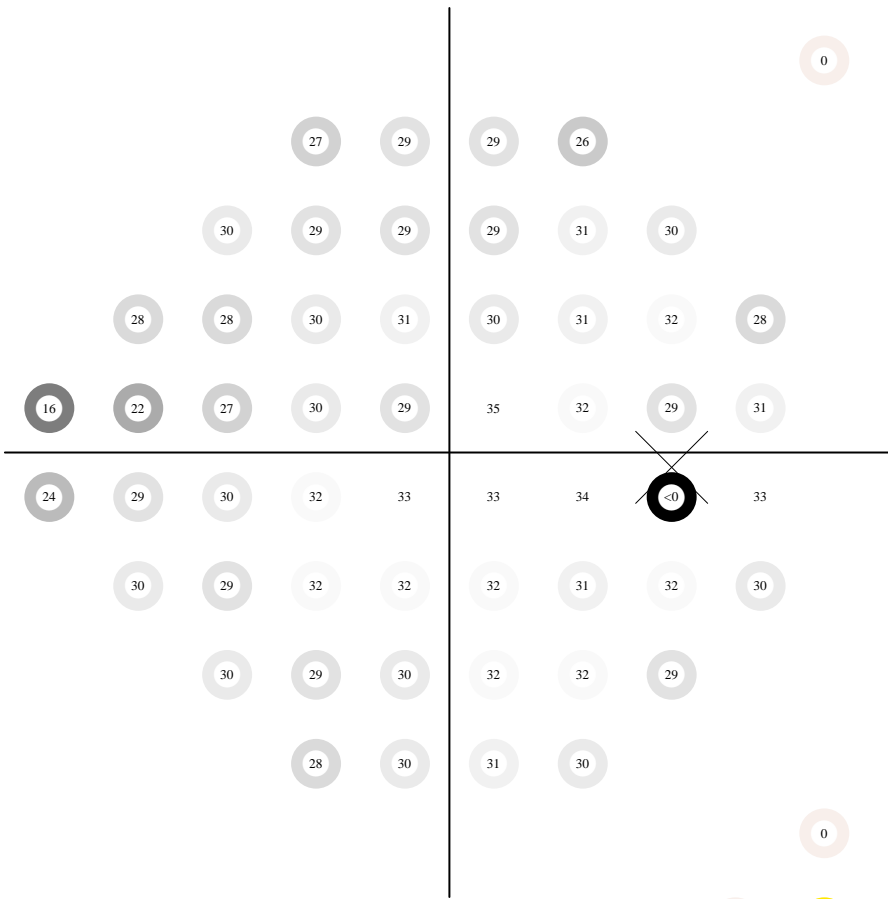

pattern deviation

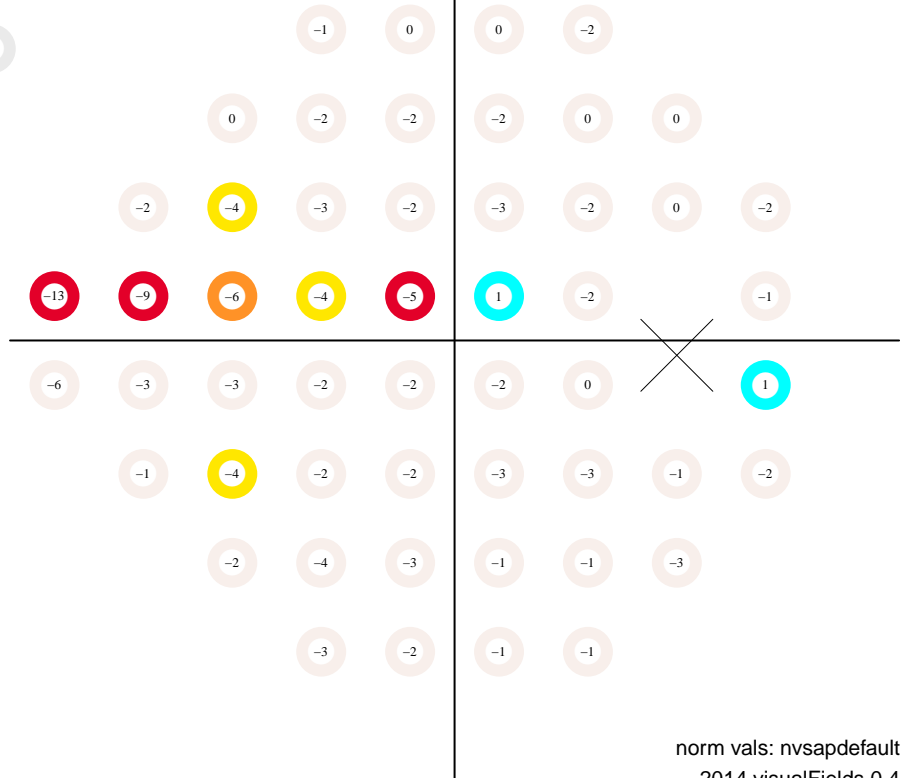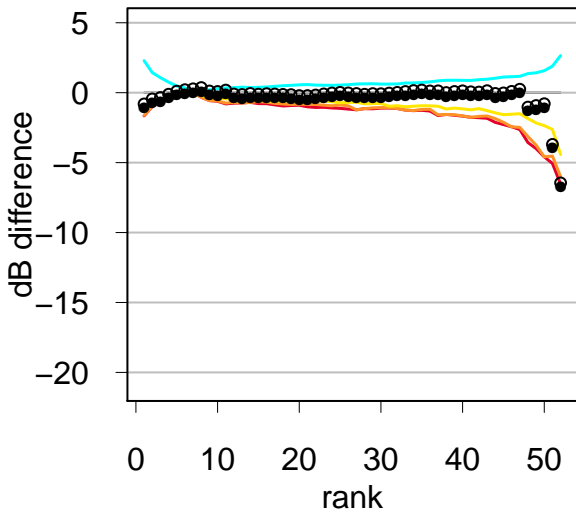

# Static Automated Perimetry. Single field analysis

Subject ID: 1017, age: 60, eye: OD (right)

Date: 11/15/2011 at 9:51:

Duration: 04:58, pause: 00:00

false positives 0.0 %

false negatives 0.0 %

fixation losses 0.0 %

MS 29.8 dB

MD -0.5 dB (p < 95 %)

PSD 1.6 dB (p < 95 %)

VFI 98.6 % (p < 95 %)

GH 1.5 dB

total deviation

Central 24-2  
SITA standard

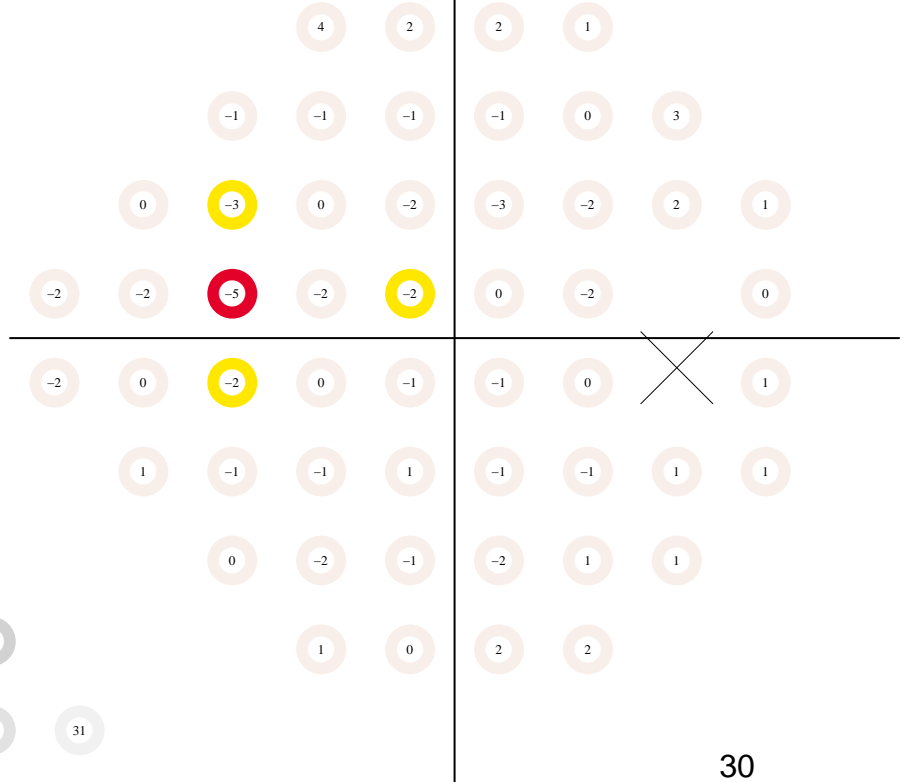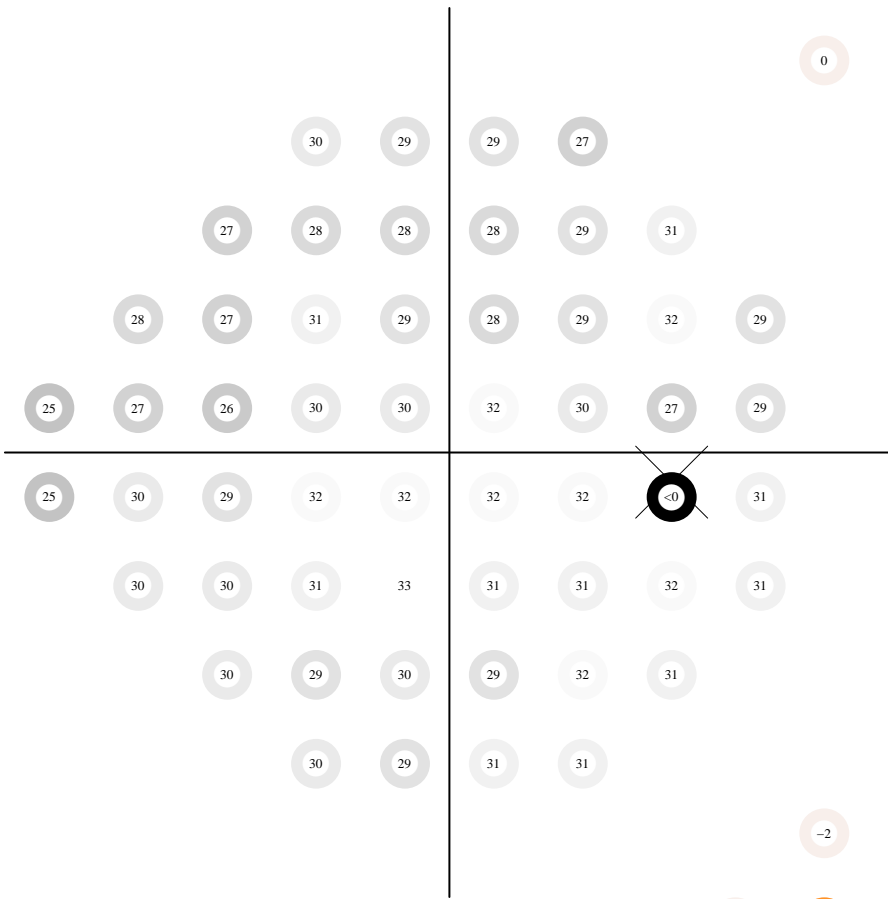

pattern deviation

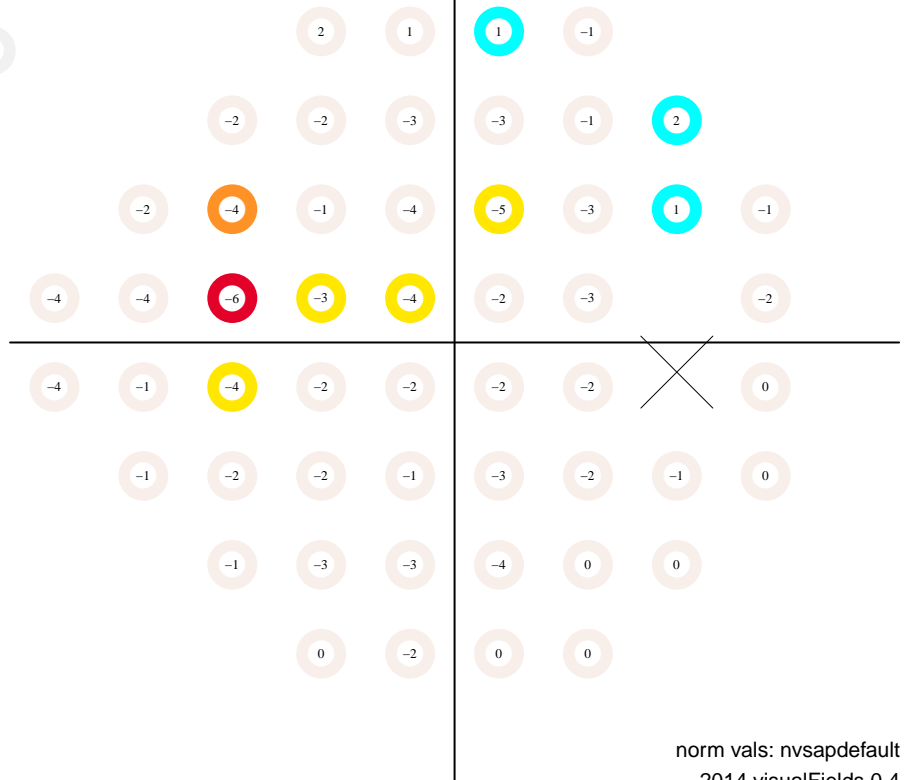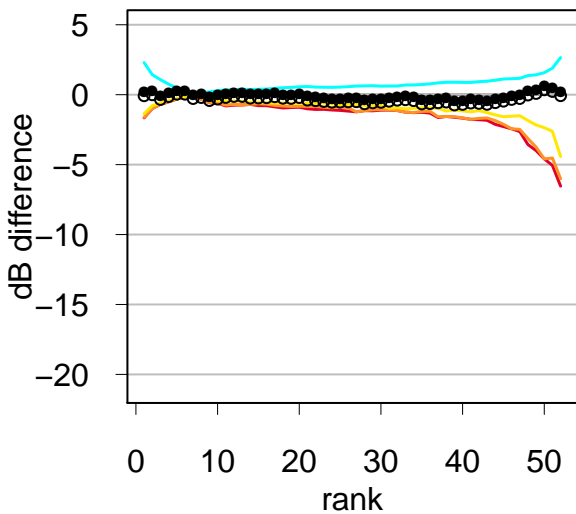



# Static Automated Perimetry. Single field analysis

Subject ID: 1017, age: 61, eye: OD (right)

Date: 06/05/2012 at 11:30

Duration: 04:23, pause: 00:00

false positives 4.0 %

false negatives 0.0 %

fixation losses 0.0 %

MS 30.2 dB

MD -0.1 dB (p < 95 %)

PSD 1.7 dB (p < 95 %)

VFI 98.5 % (p < 95 %)

GH 2.3 dB

total deviation

Central 24-2  
SITA standard

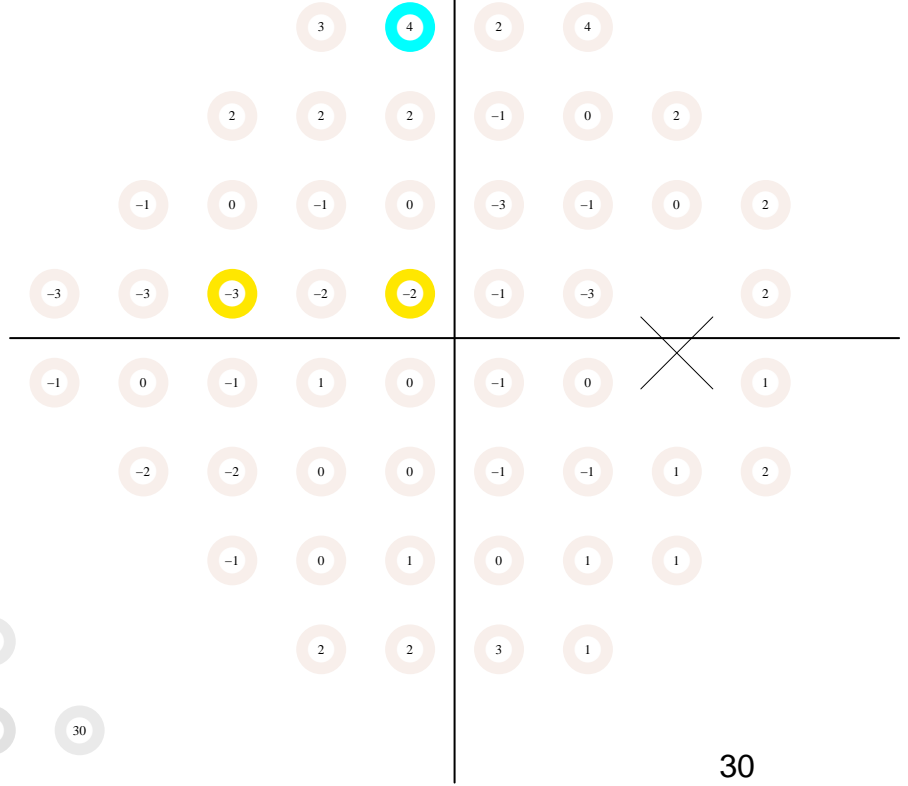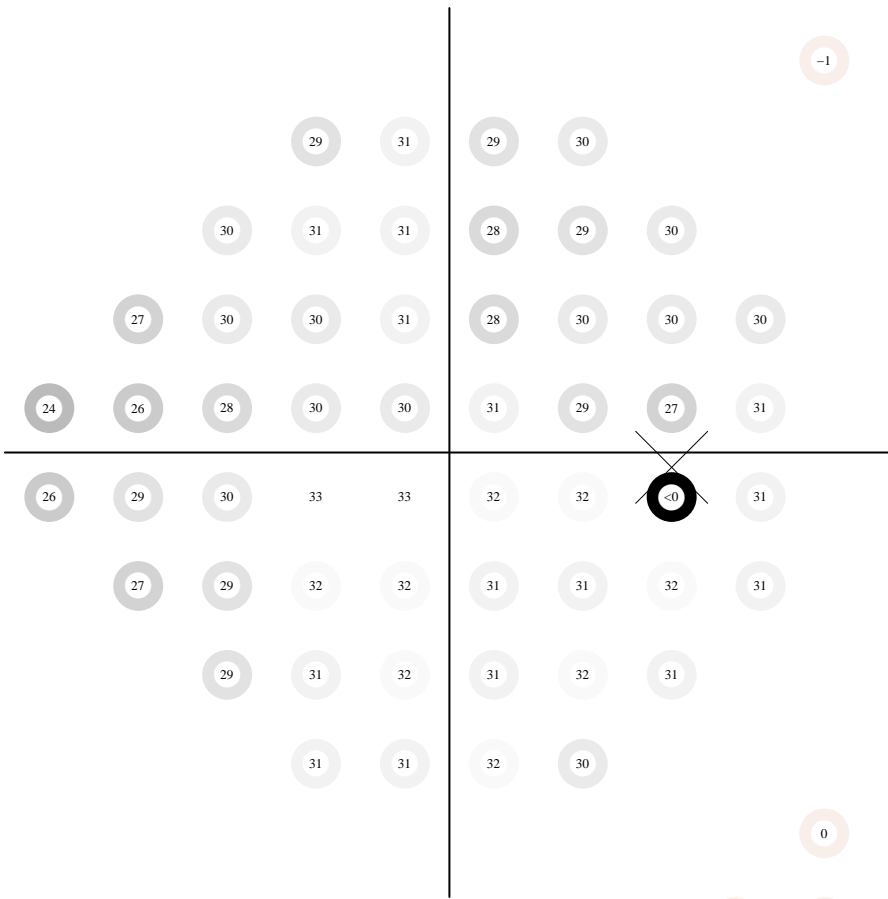

pattern deviation

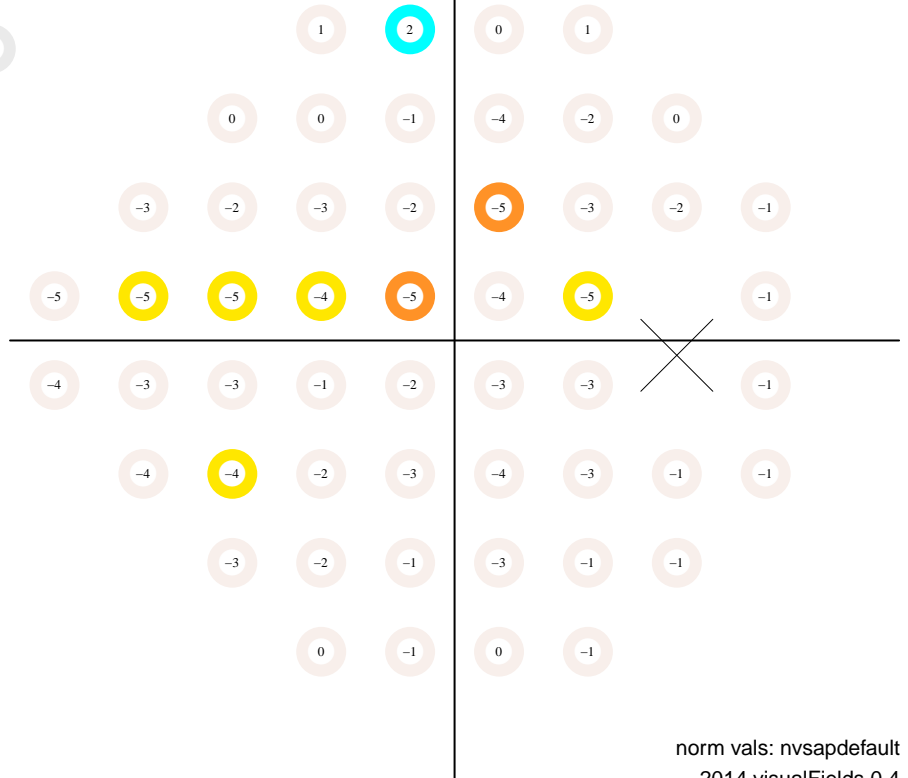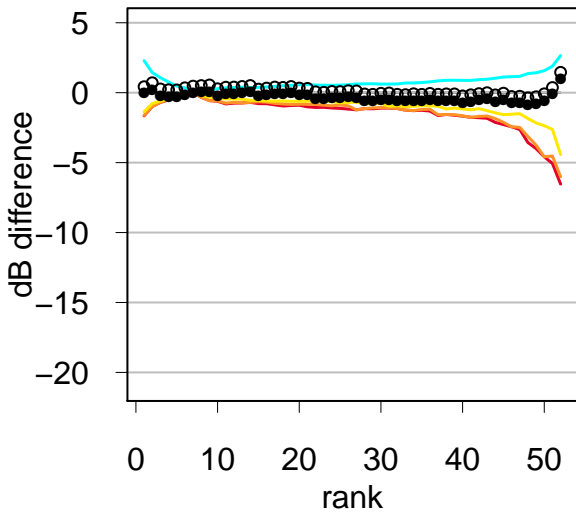

# Static Automated Perimetry. Single field analysis

Subject ID: 1017, age: 61, eye: OD (right)

Date: 09/18/2012 at 7:16:

Duration: 04:28, pause: 00:00

false positives 1.0 %

false negatives 0.0 %

fixation losses 7.1 %

MS 29.9 dB

MD -0.4 dB (p < 95 %)

PSD 2.3 dB (p < 95 %)

VFI 98.8 % (p < 95 %)

GH 2.1 dB

total deviation

Central 24-2  
SITA standard

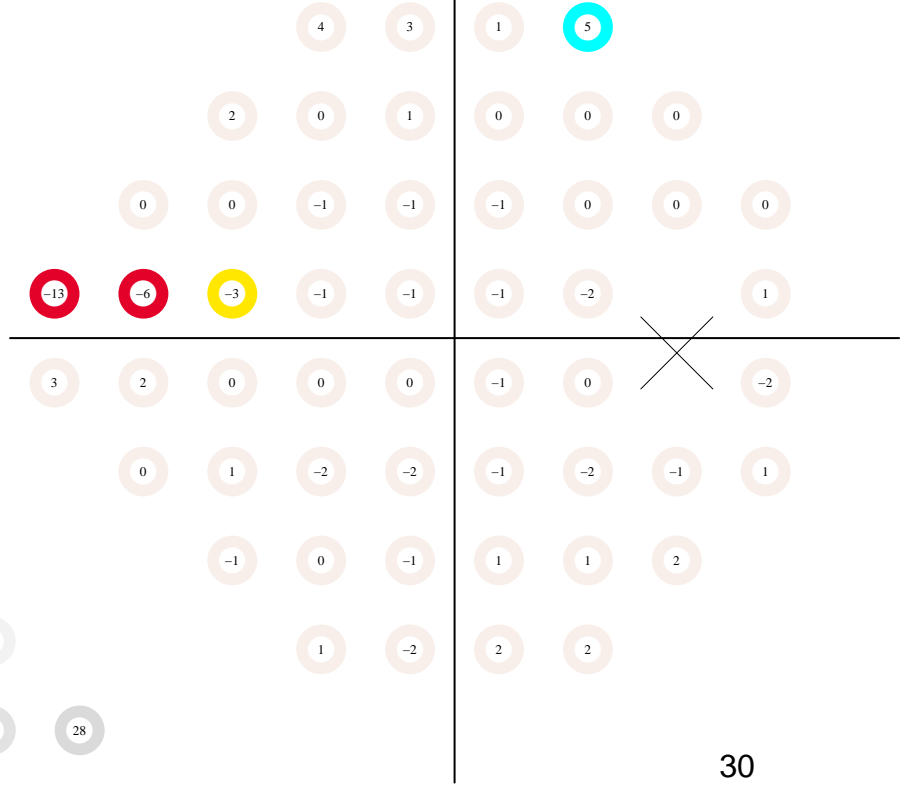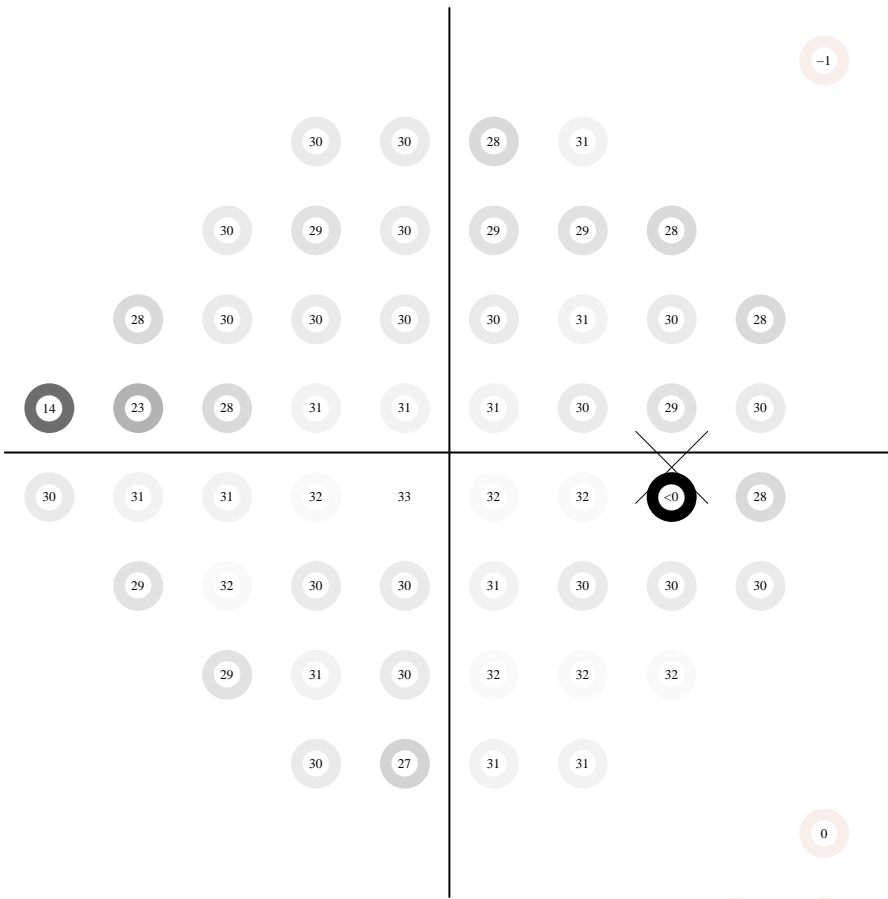

pattern deviation

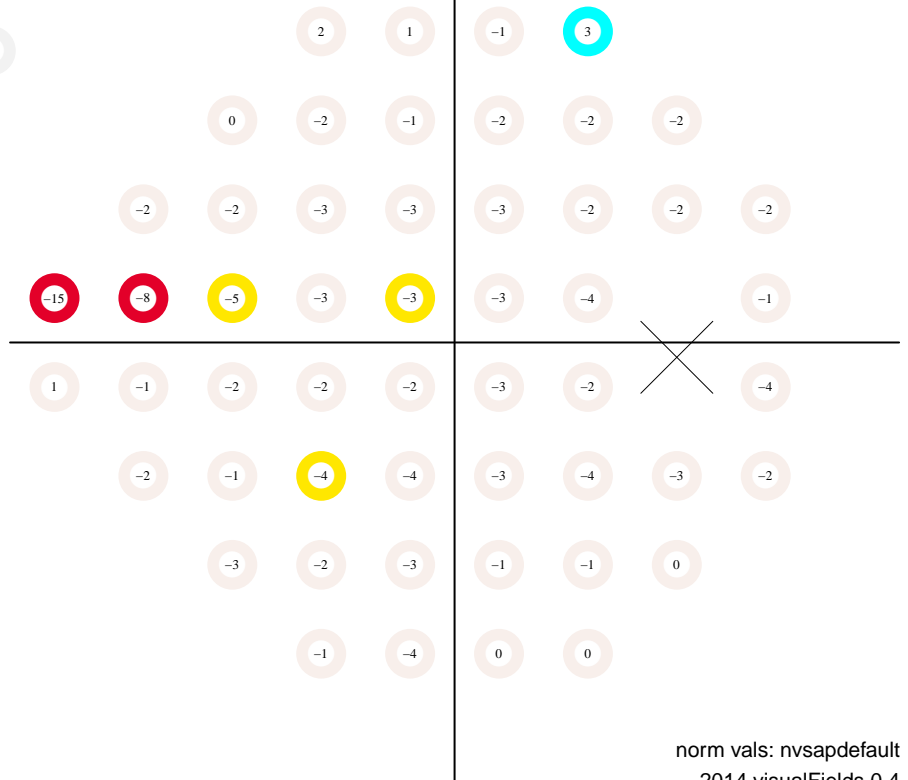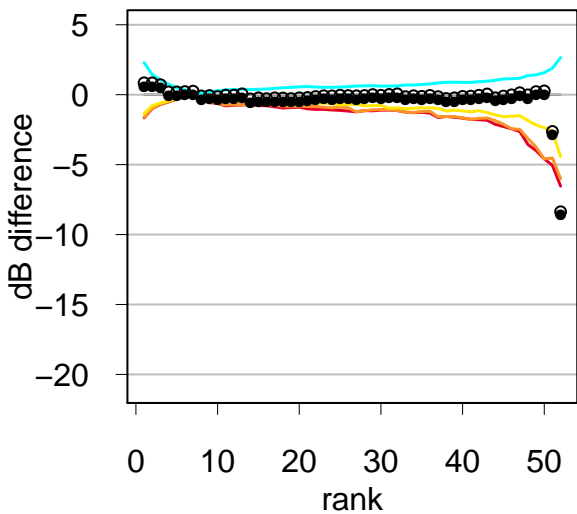

# Static Automated Perimetry. Single field analysis

Subject ID: 1017, age: 61, eye: OD (right)

Date: 12/18/2012 at 8:09:

Duration: 04:35, pause: 00:00

false positives 4.0 %

false negatives 0.0 %

fixation losses 7.1 %

MS 30.8 dB

MD 0.5 dB (p < 95 %)

PSD 1.6 dB (p < 95 %)

VFI 99.5 % (p < 95 %)

GH 2.6 dB

total deviation

Central 24-2  
SITA standard

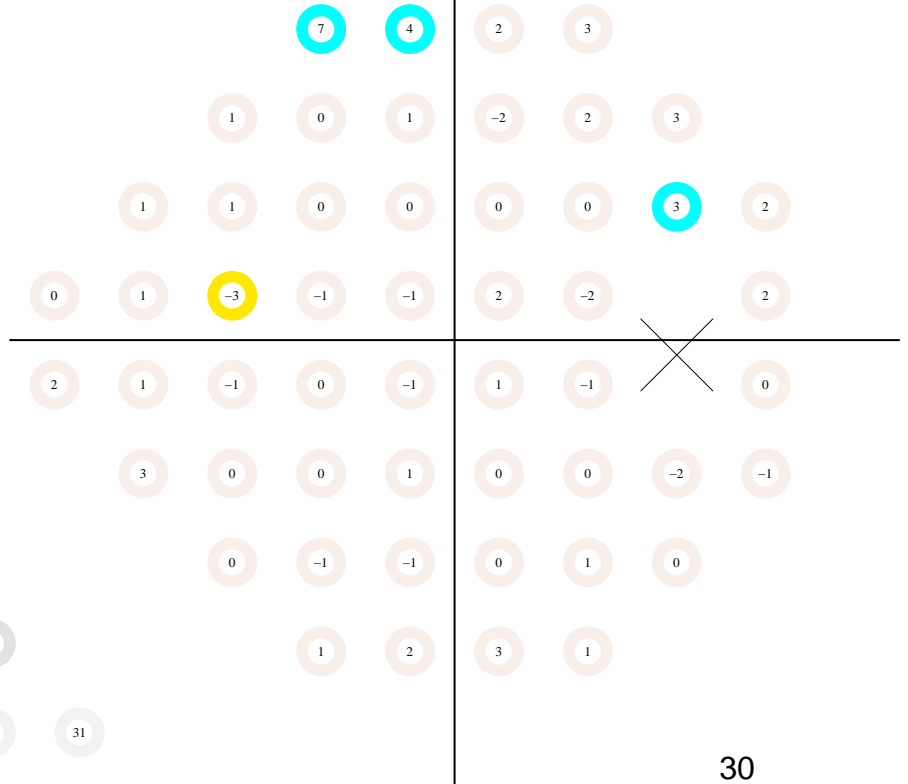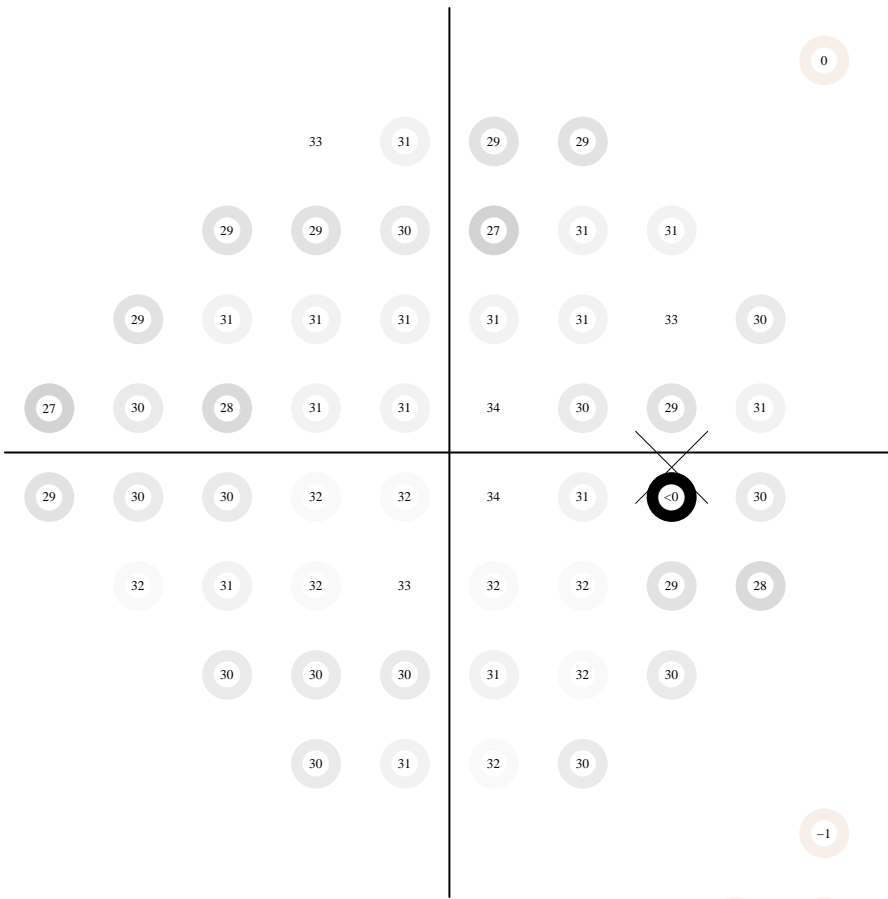

pattern deviation

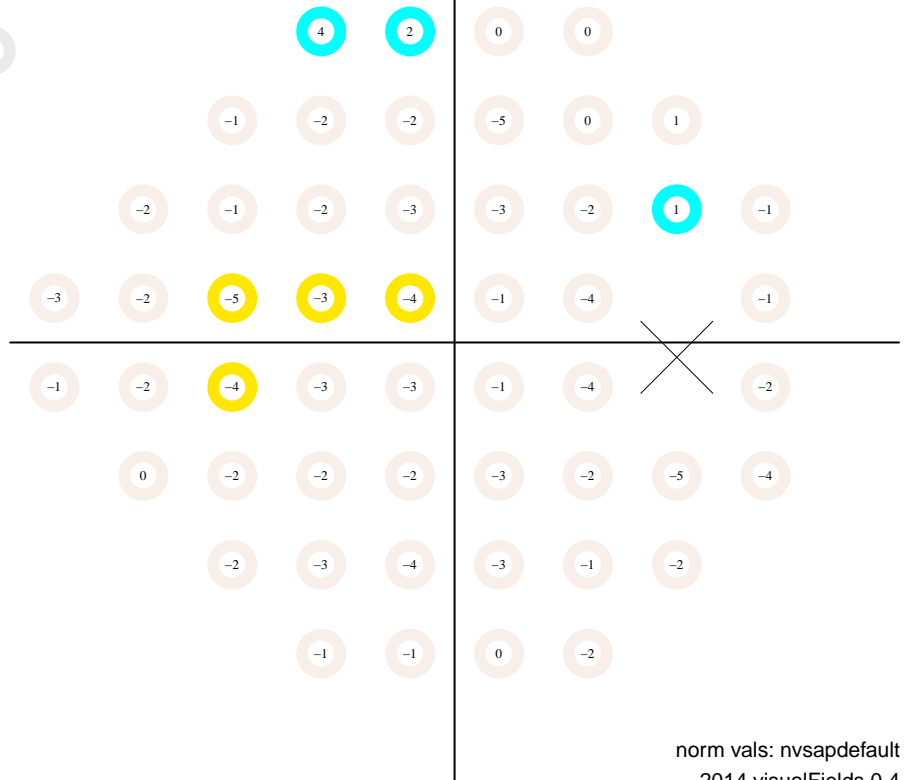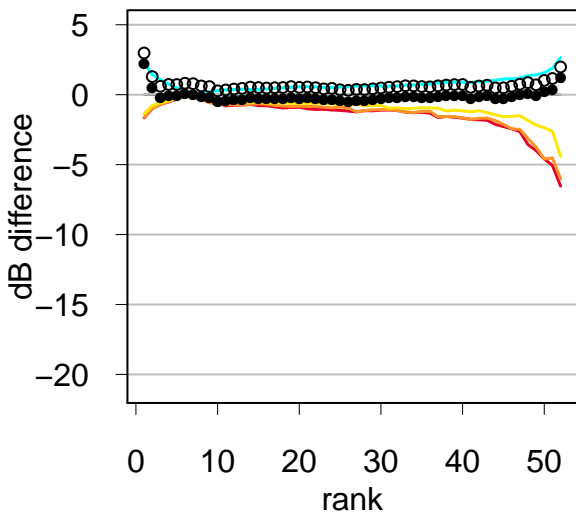

# Static Automated Perimetry. Single field analysis

Subject ID: 1017, age: 61, eye: OD (right)

Date: 03/19/2013 at 8:21:

Duration: 04:23, pause: 00:00

false positives 0.0 %

false negatives 0.0 %

fixation losses 7.1 %

MS 30.1 dB

MD -0.2 dB (p < 95 %)

PSD 2.2 dB (p < 95 %)

VFI 98.3 % (p < 95 %)

GH 2.3 dB

total deviation

Central 24-2  
SITA standard

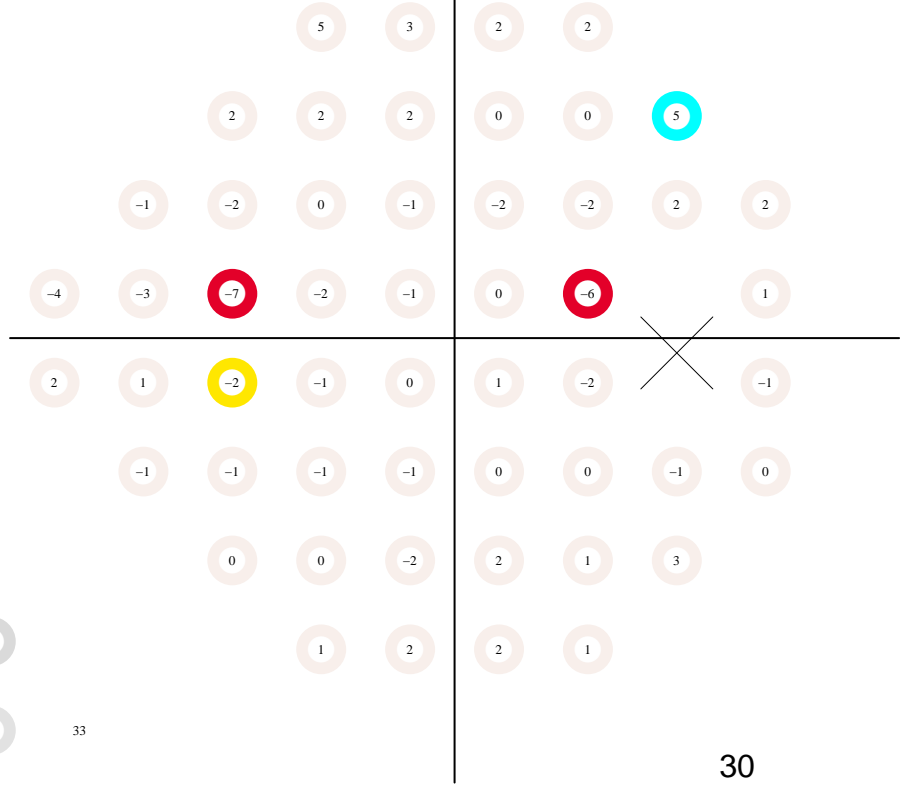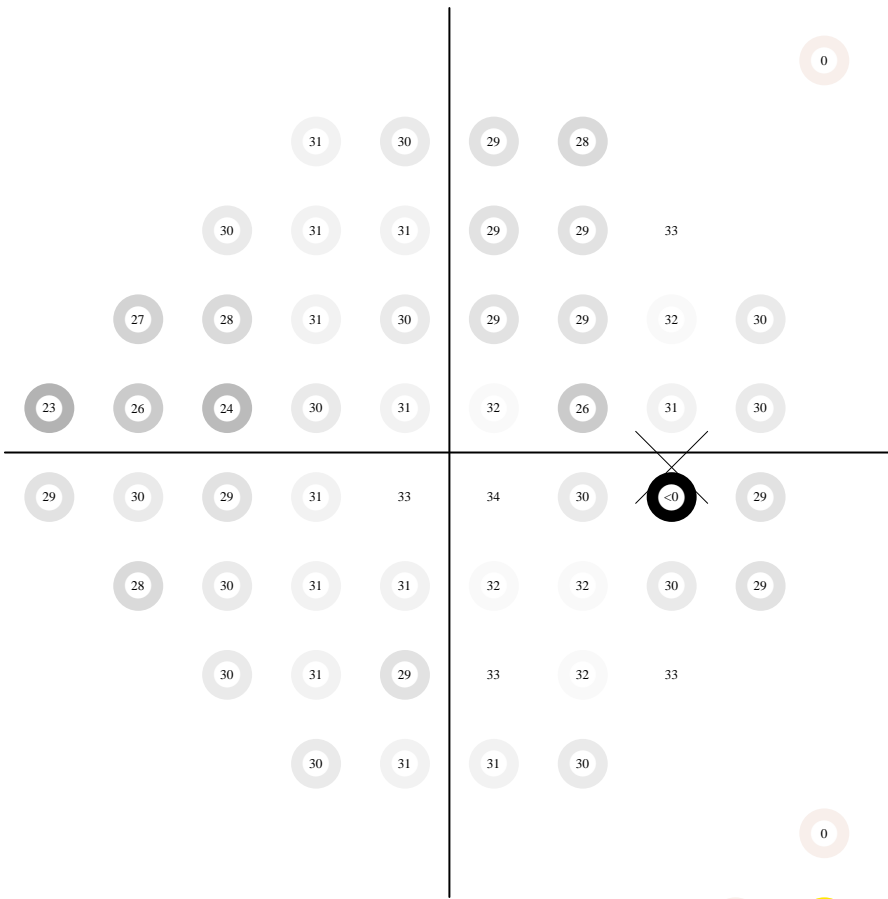

pattern deviation

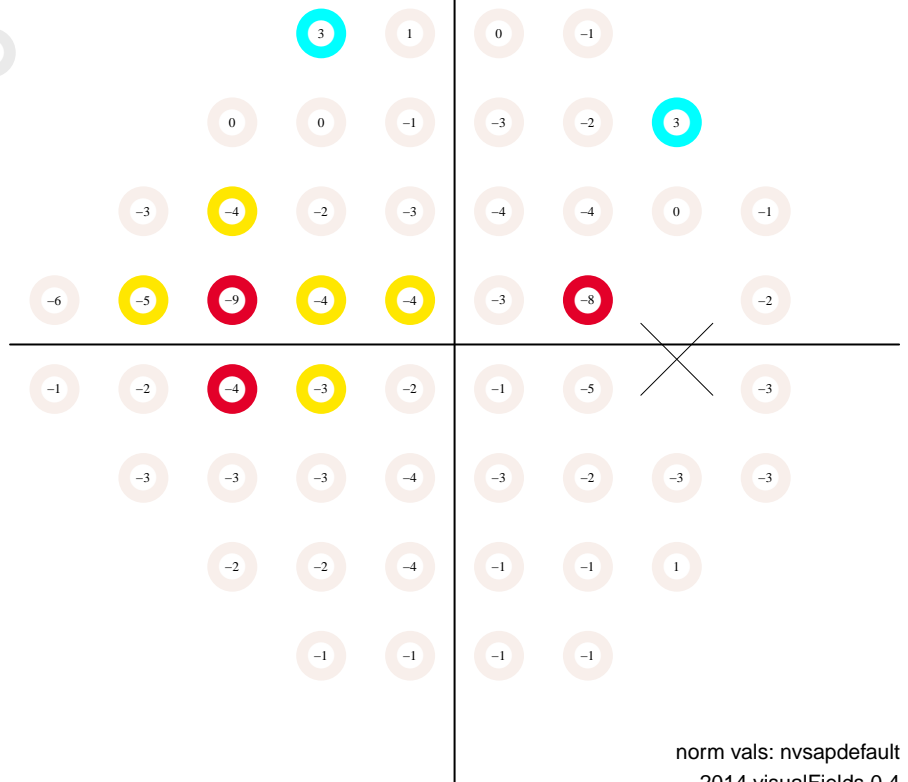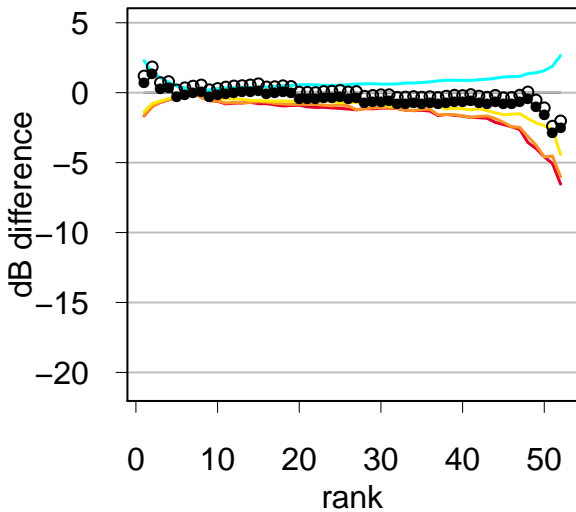



# Static Automated Perimetry. Single field analysis

Subject ID: 1019, age: 53, eye: OS (left)

Date: 09/08/2006 at 8:15:

Duration: 04:48, pause: 00:00

false positives 0.0 %

false negatives 0.0 %

fixation losses 0.0 %

MS 30.2 dB

MD -0.5 dB (p < 95 %)

PSD 2.9 dB (p < 95 %)

VFI 98.1 % (p < 95 %)

GH 1.9 dB

total deviation

Central 24-2  
SITA standard

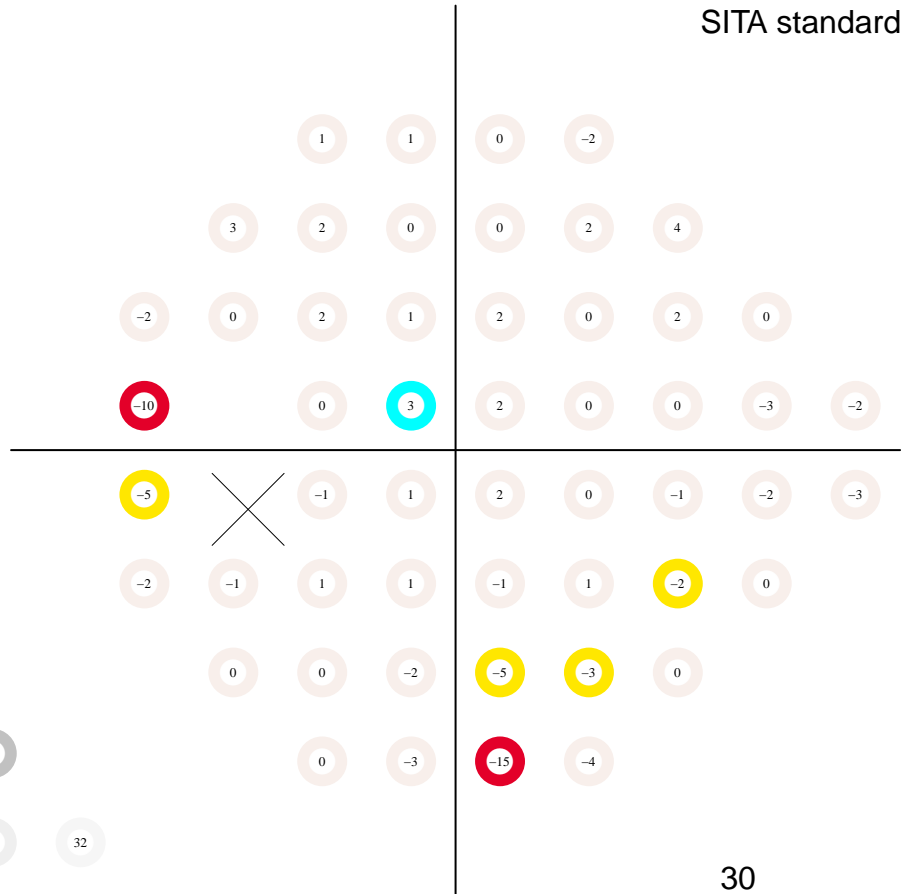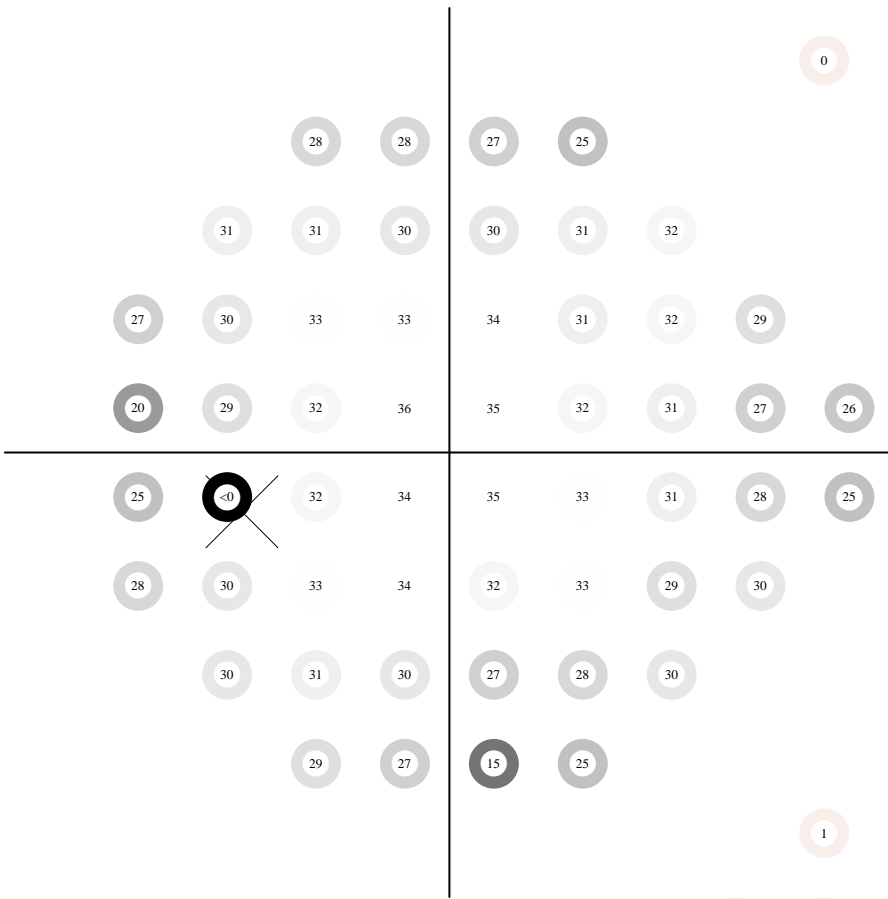

pattern deviation

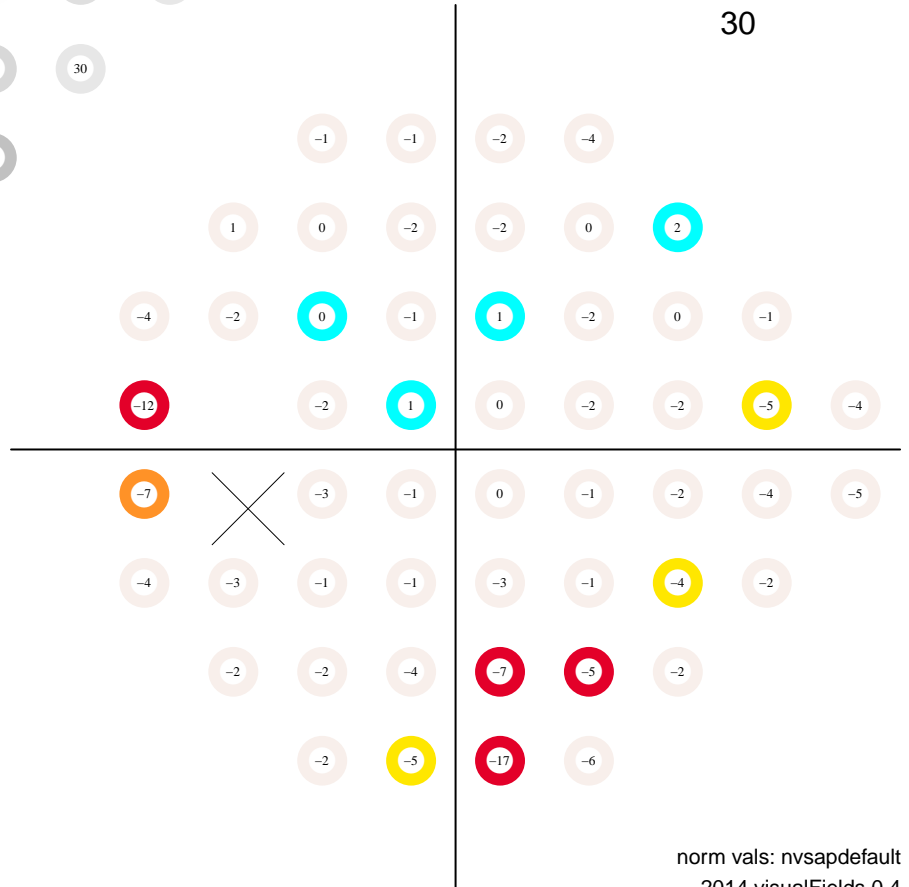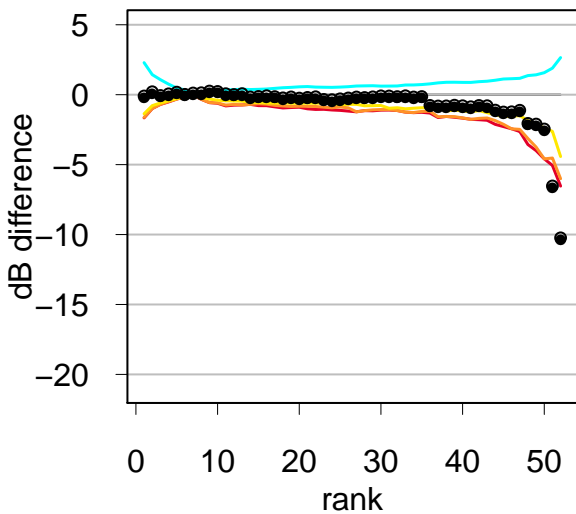

# Static Automated Perimetry. Single field analysis

Subject ID: 1019, age: 53, eye: OS (left)

Date: 03/20/2007 at 10:29

Duration: 05:08, pause: 00:00

false positives 4.0 %

false negatives 4.0 %

fixation losses 7.7 %

MS 30.7 dB

MD -0.1 dB (p < 95 %)

PSD 2.6 dB (p < 95 %)

VFI 98.8 % (p < 95 %)

GH 2.0 dB

total deviation

Central 24-2  
SITA standard

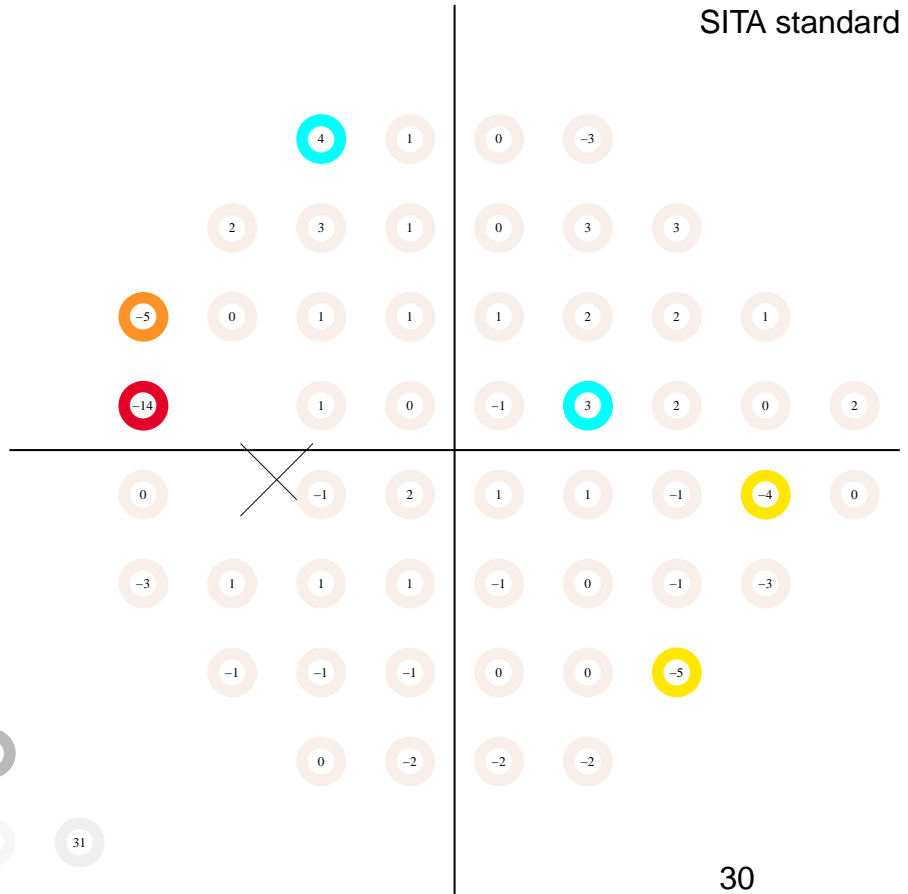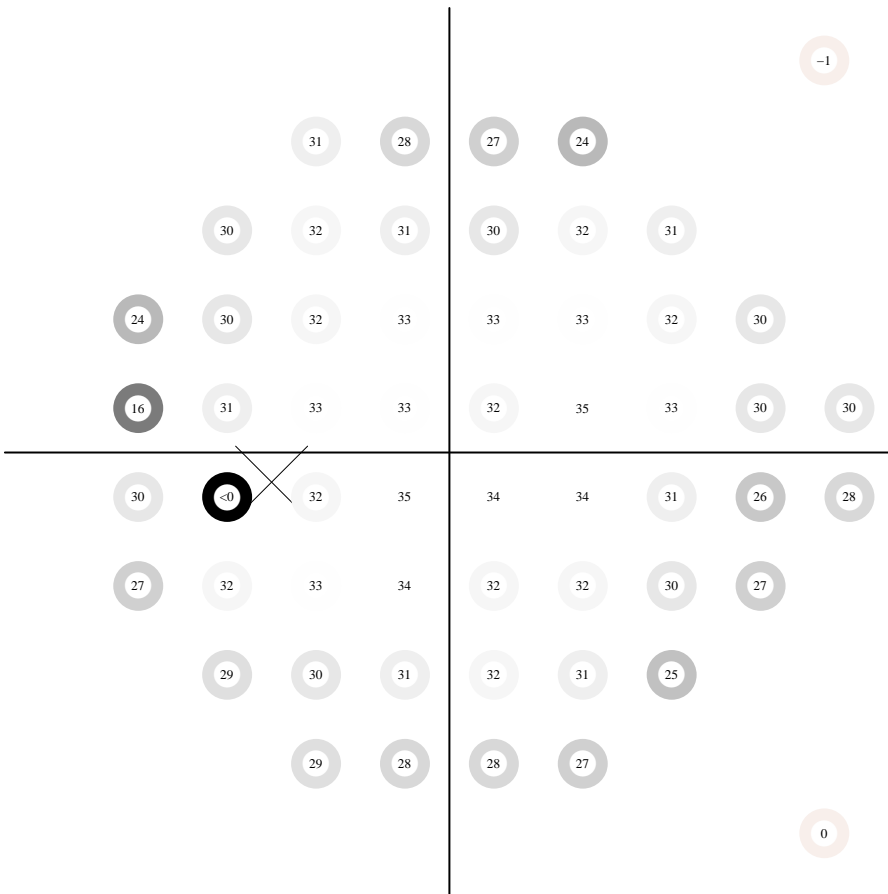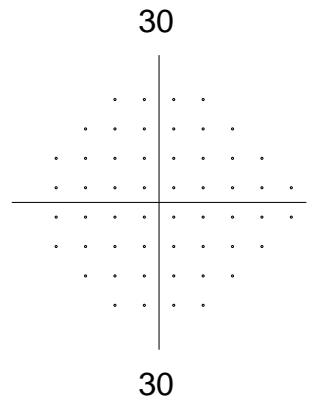

pattern deviation

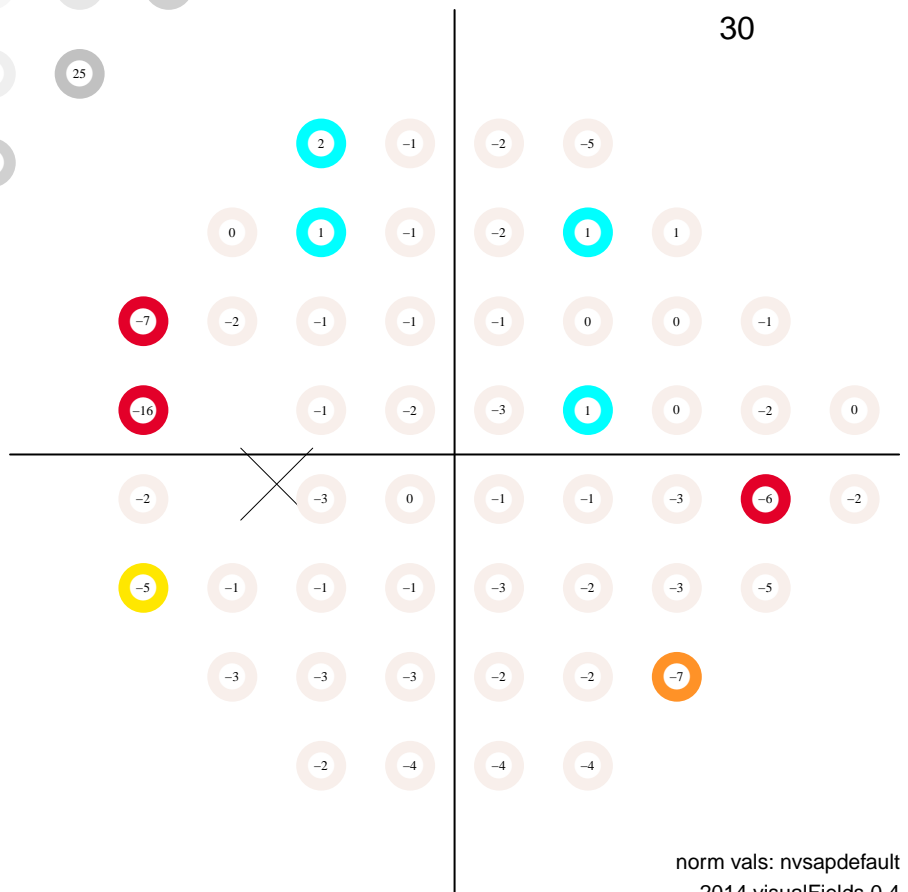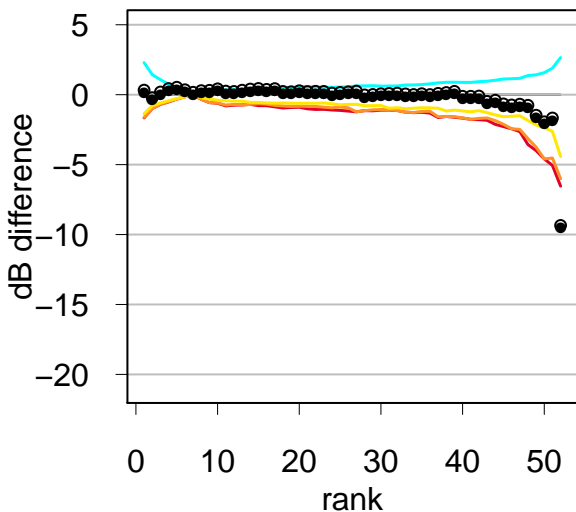

# Static Automated Perimetry. Single field analysis

Subject ID: 1019, age: 53, eye: OS (left)

Date: 03/21/2007 at 9:44:

Duration: 04:52, pause: 00:00

false positives 0.0 %

false negatives 3.0 %

fixation losses 7.1 %

MS 29.9 dB

MD -0.8 dB (p < 95 %)

PSD 2.9 dB (p < 95 %)

VFI 97.6 % (p < 5 %)

GH 1.8 dB

total deviation

Central 24-2  
SITA standard

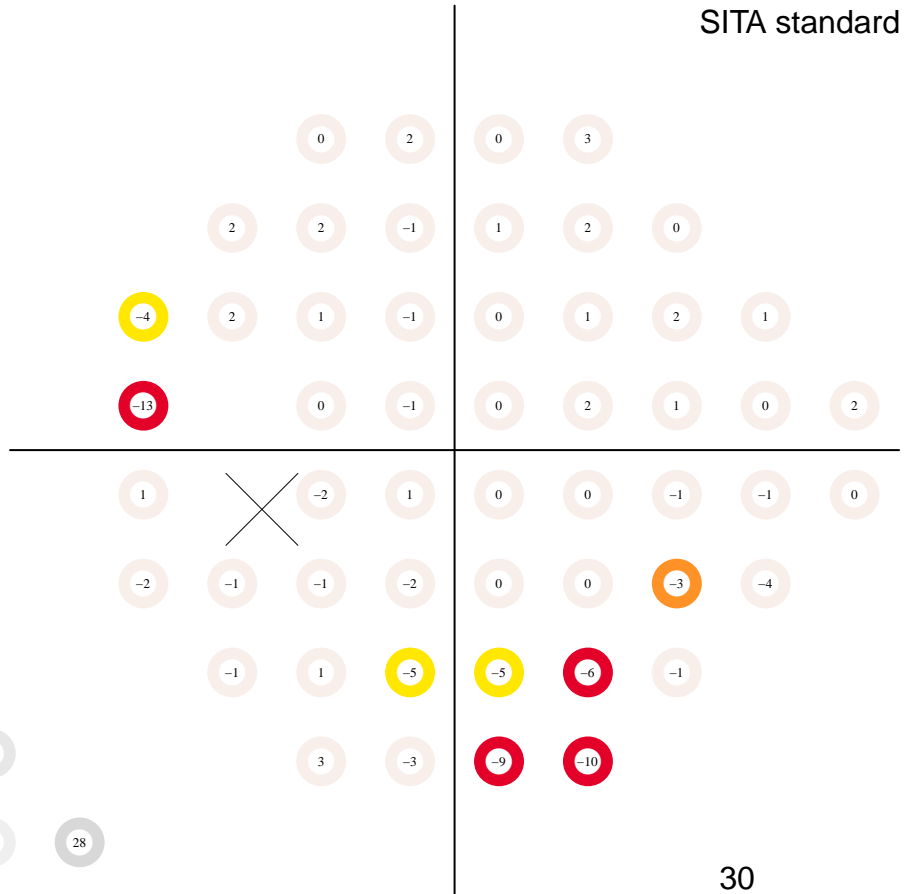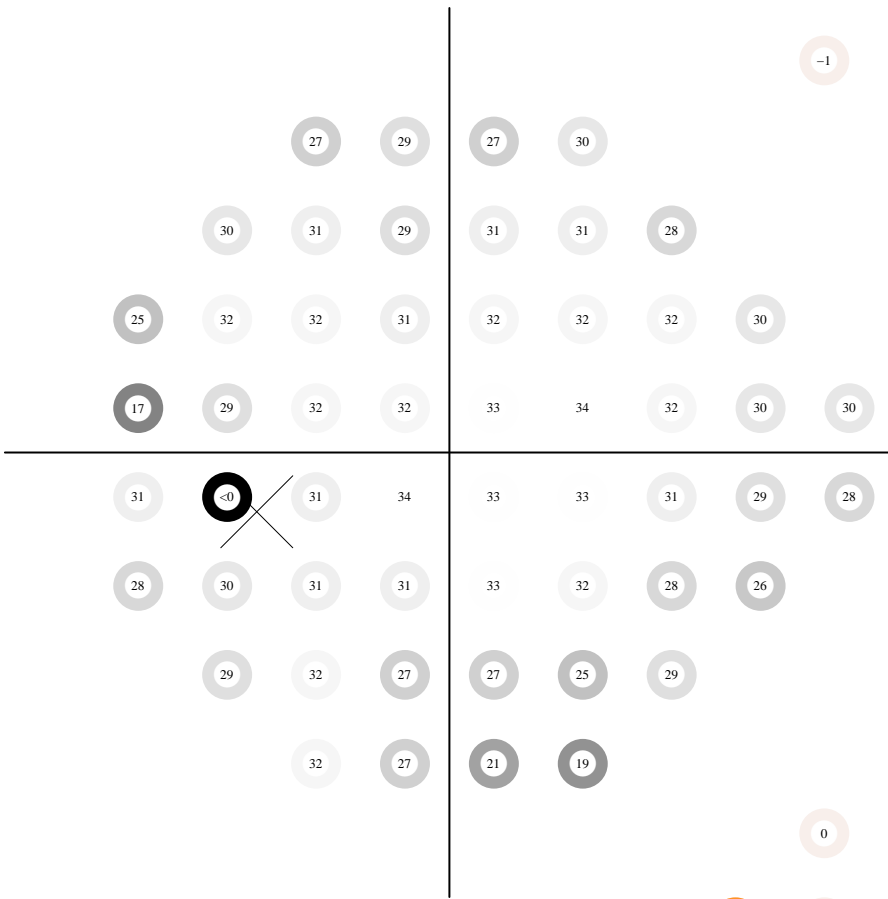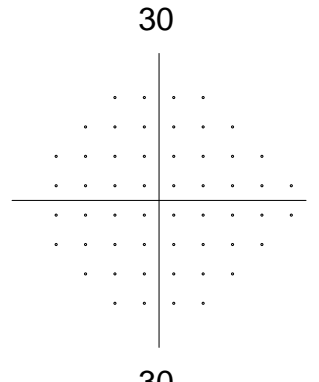

pattern deviation

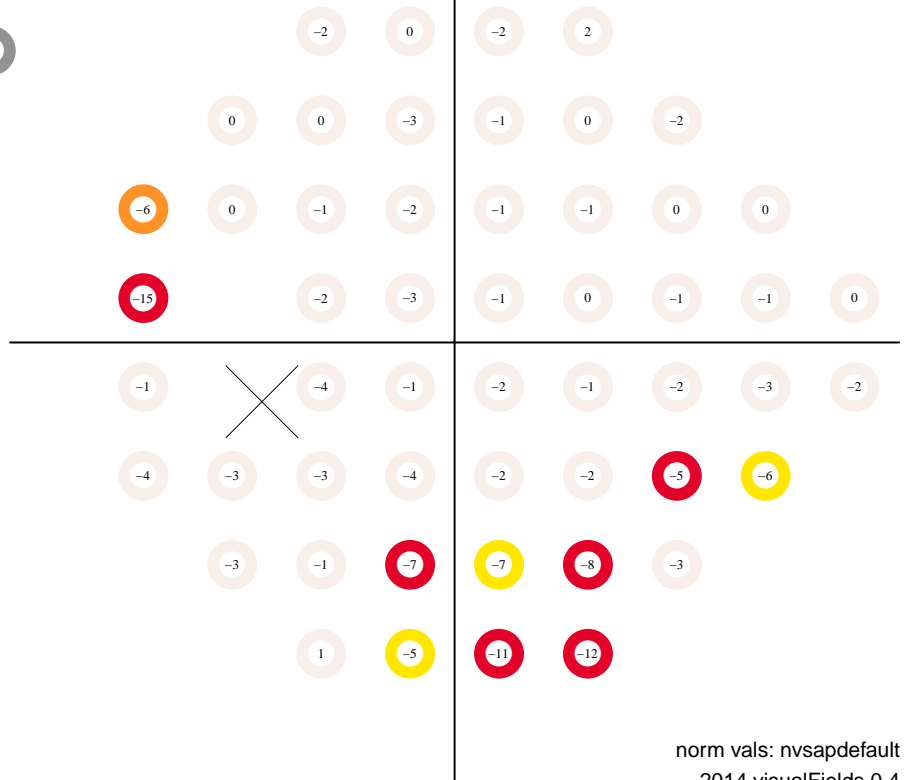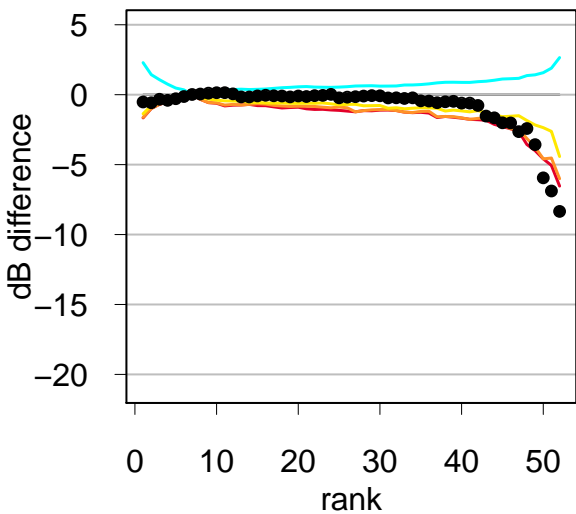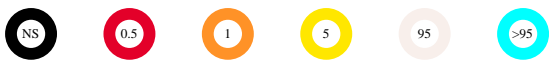

# Static Automated Perimetry. Single field analysis

Subject ID: 1019, age: 54, eye: OS (left)

Date: 09/25/2007 at 11:06

Duration: 05:16, pause: 00:00

false positives 0.0 %

false negatives 6.0 %

fixation losses 0.0 %

MS 28.6 dB

MD -2.1 dB (p < 95 %)

PSD 2.5 dB (p < 95 %)

VFI 97.3 % (p < 5 %)

GH 0.6 dB

total deviation

Central 24-2  
SITA standard

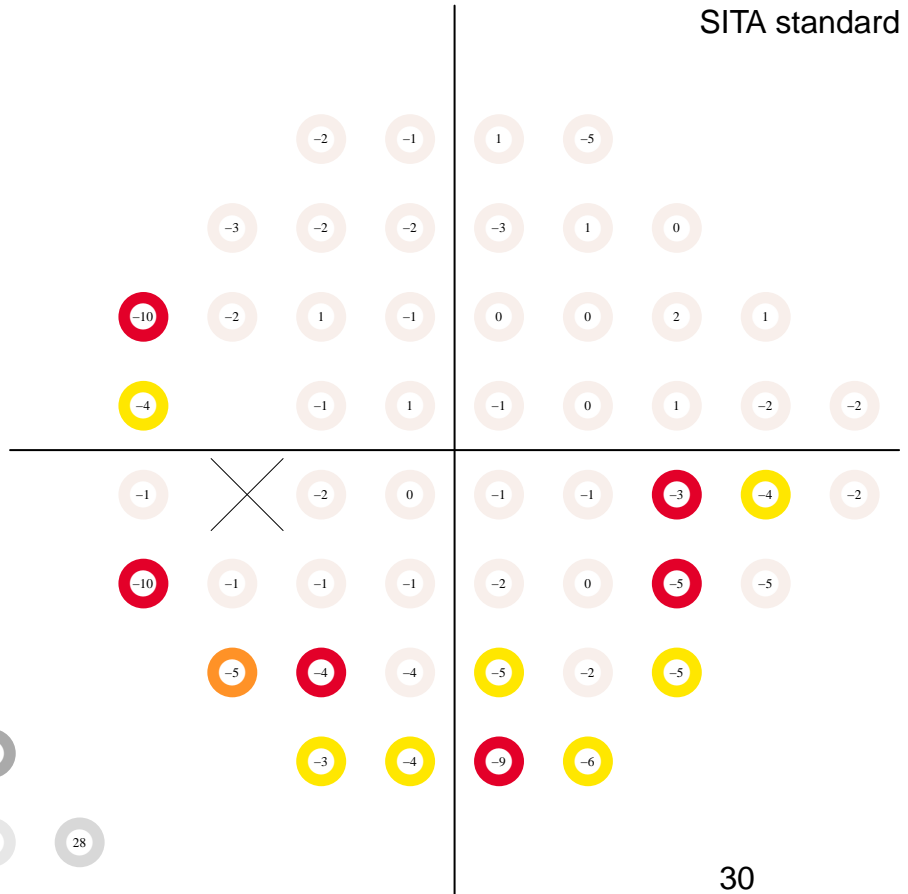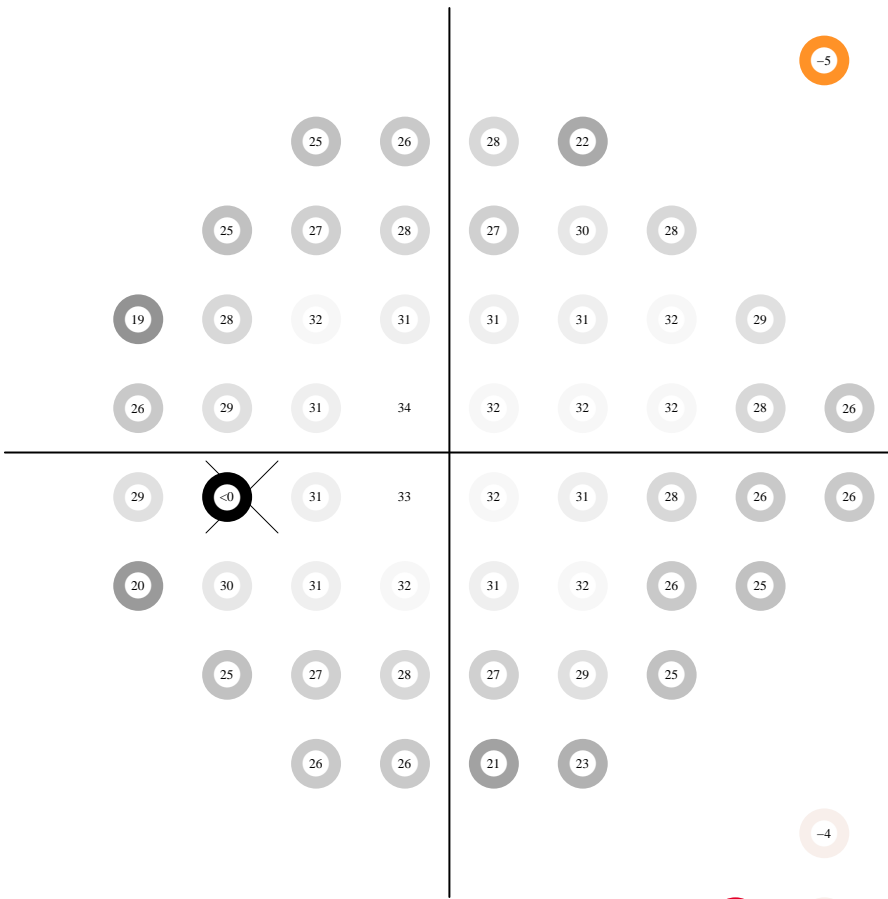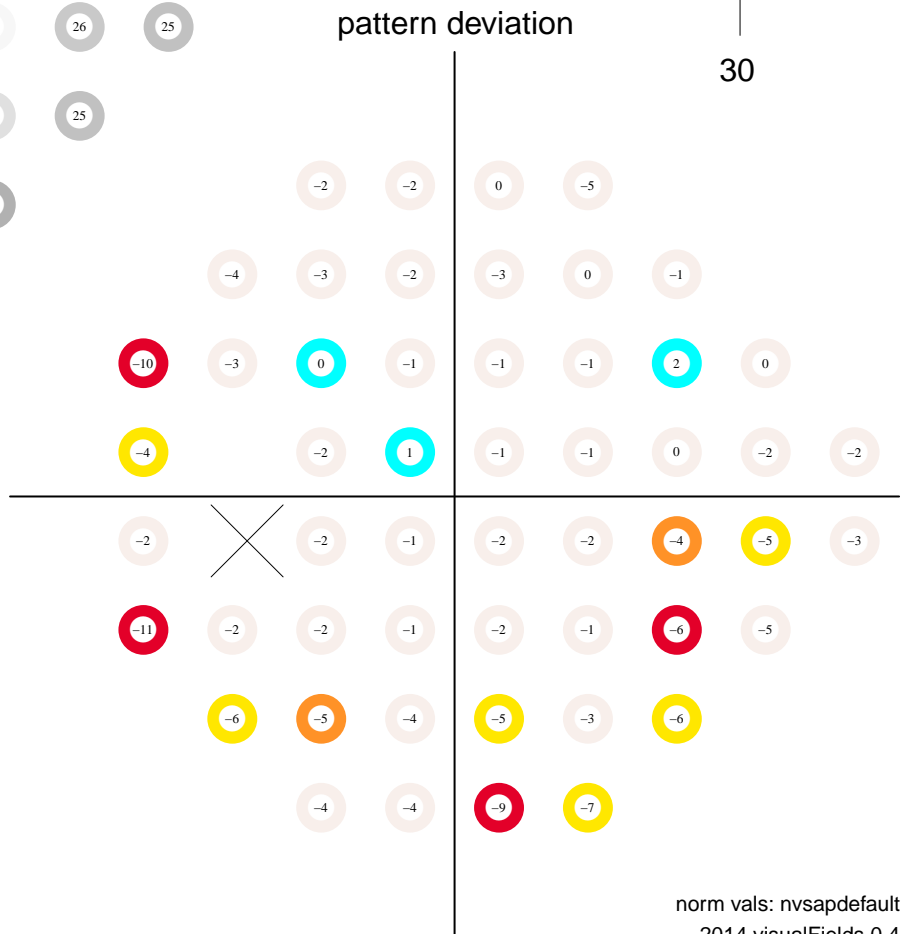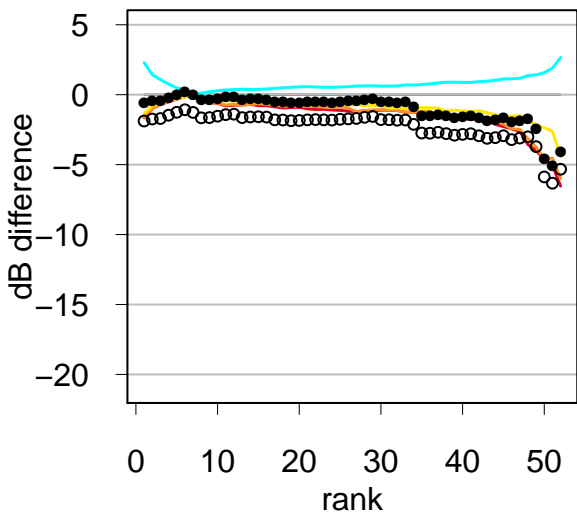

# Static Automated Perimetry. Single field analysis

Subject ID: 1019, age: 54, eye: OS (left)

Date: 04/08/2008 at 11:49

Duration: 06:06, pause: 00:00

false positives 4.0 %

false negatives 0.0 %

fixation losses 0.0 %

MS 30.1 dB

MD -0.6 dB (p < 95 %)

PSD 3.3 dB (p < 95 %)

VFI 98.0 % (p < 95 %)

GH 1.7 dB

total deviation

Central 24-2  
SITA standard

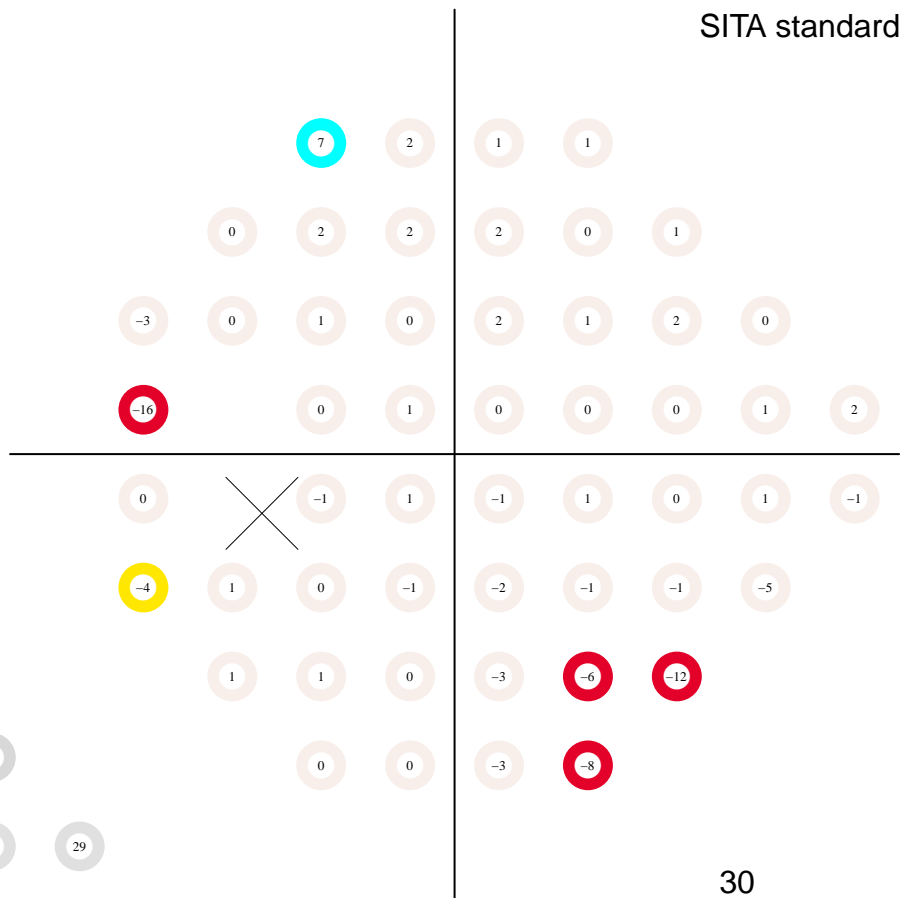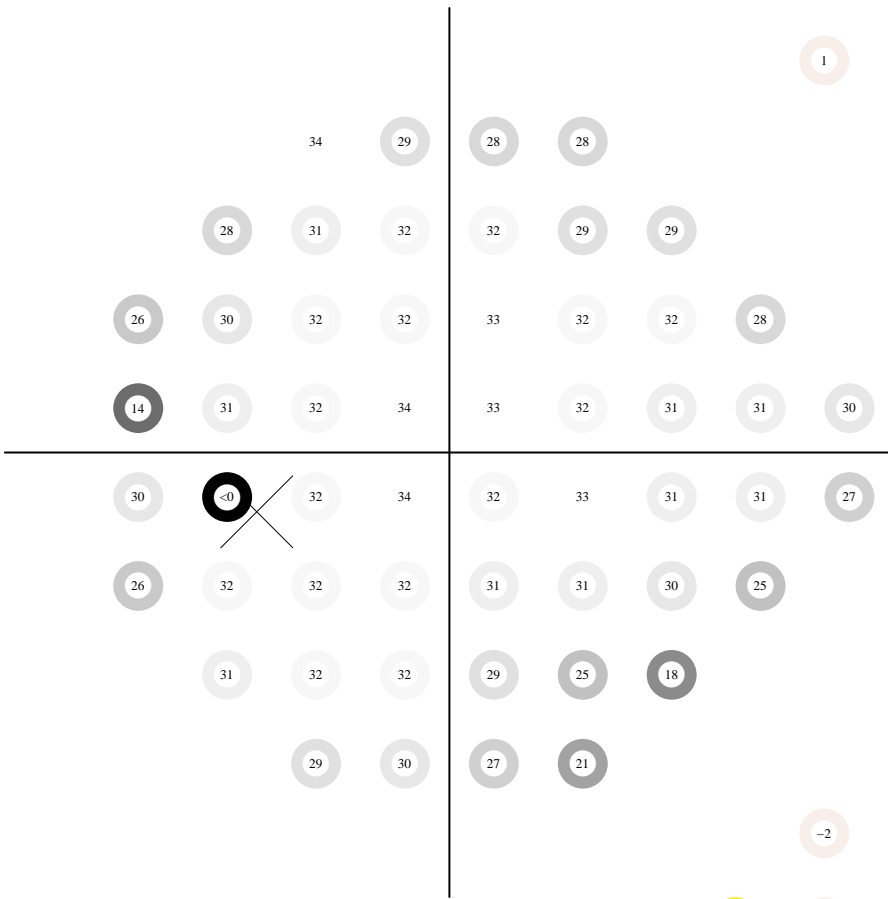

pattern deviation

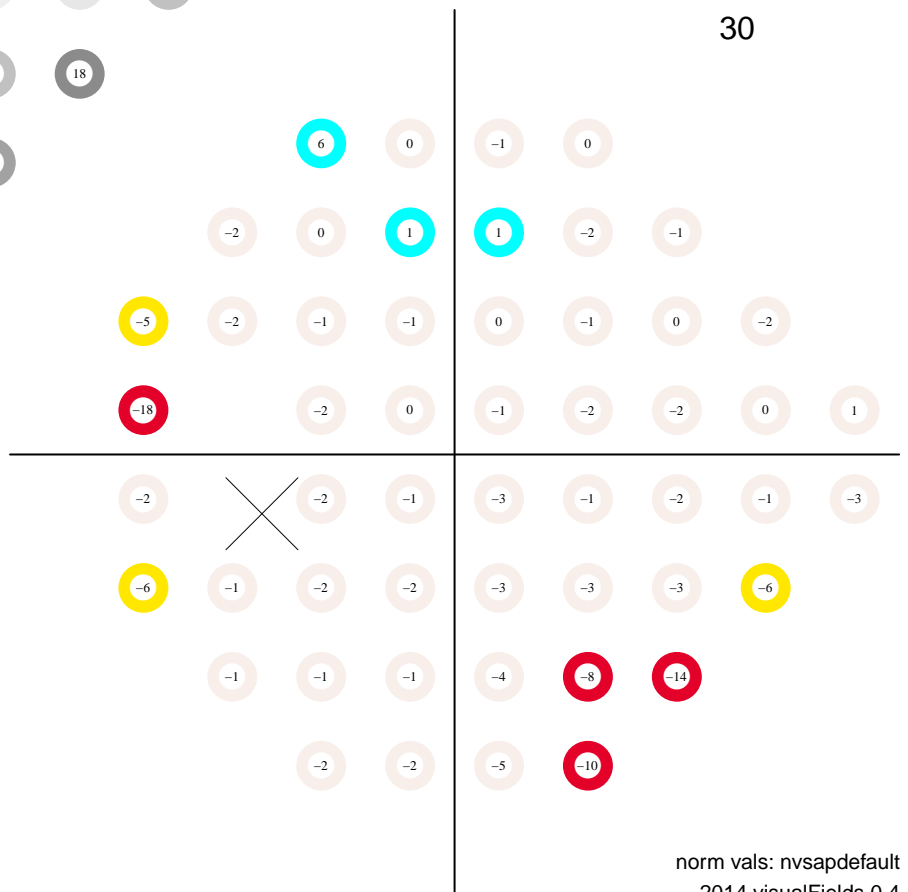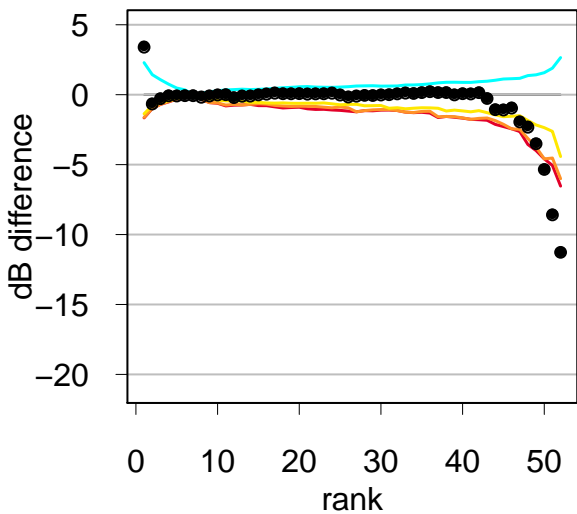

# Static Automated Perimetry. Single field analysis

Subject ID: 1019, age: 56, eye: OS (left)

Date: 11/24/2009 at 10:37

Duration: 05:13, pause: 00:00

false positives 0.0 %

false negatives 12.0 %

fixation losses 20.0 %

MS 29.6 dB

MD -0.9 dB (p < 95 %)

PSD 4.2 dB (p < 95 %)

VFI 97.3 % (p < 5 %)

GH 2.0 dB

total deviation

Central 24-2  
SITA standard

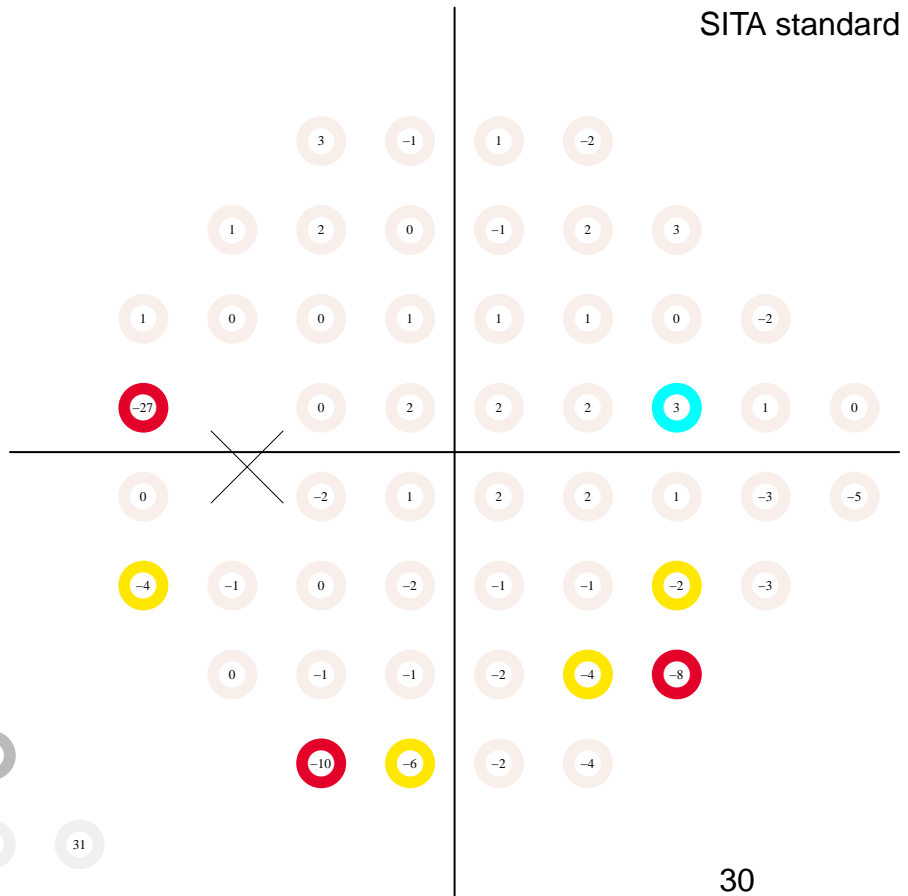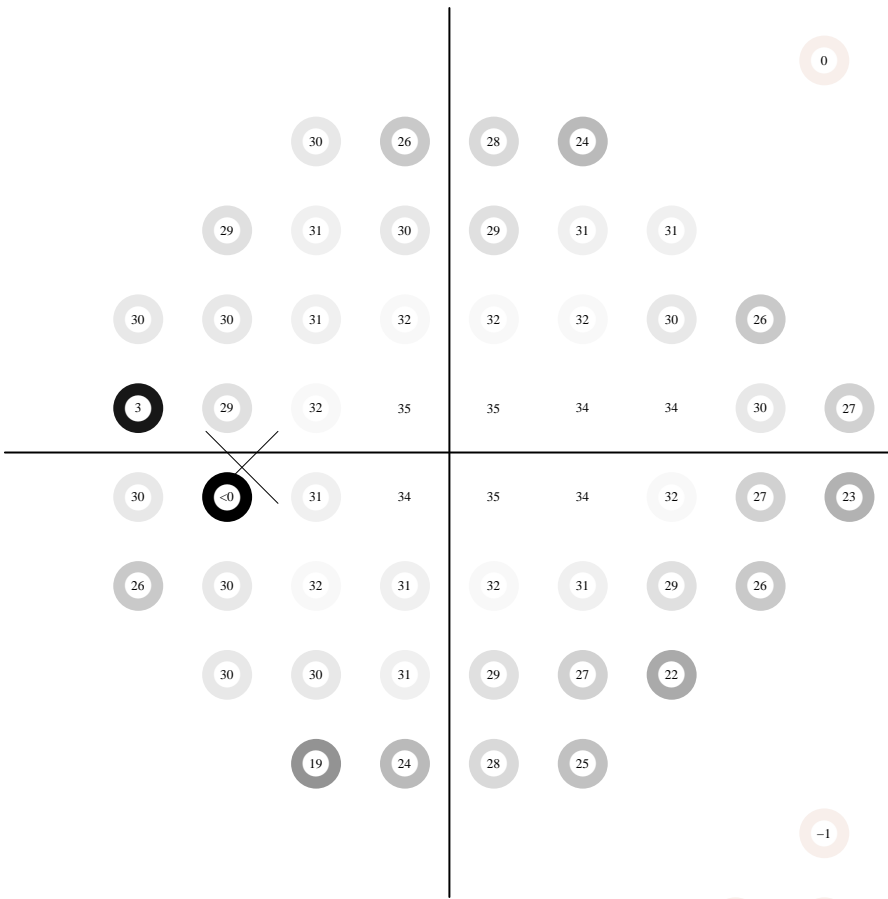

pattern deviation

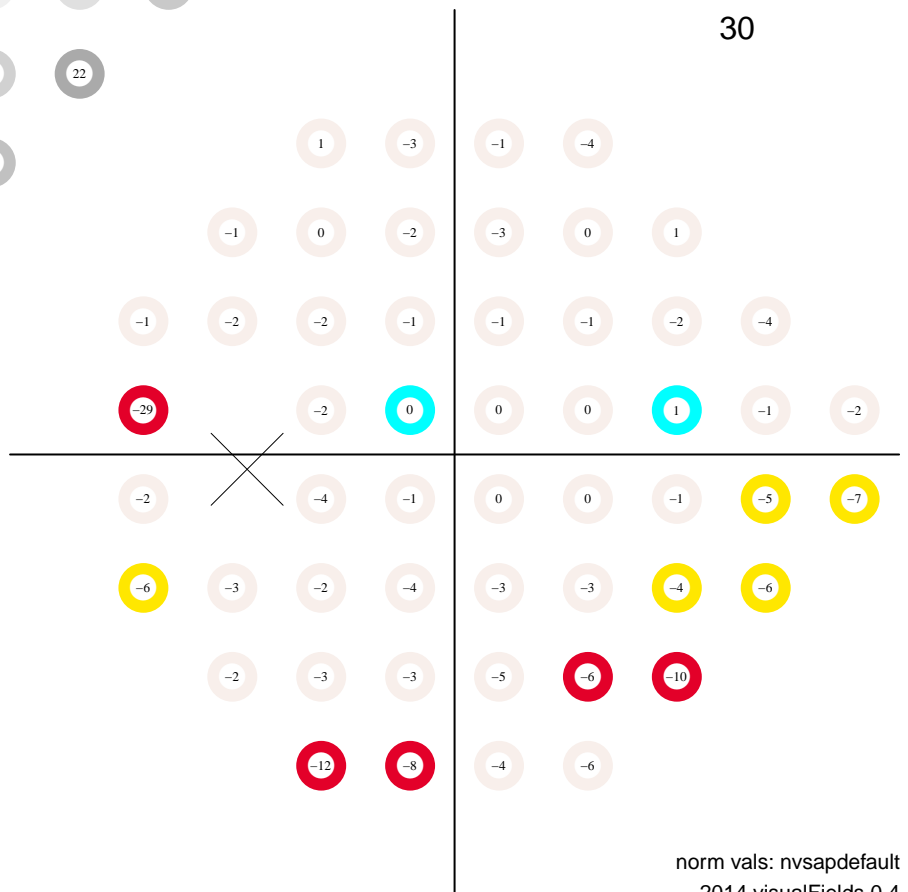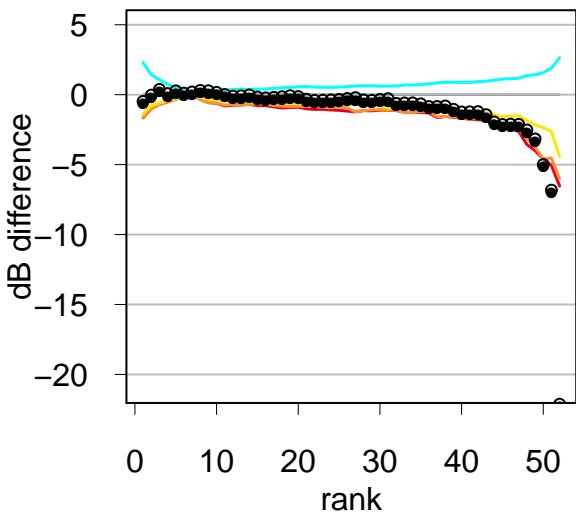

# Static Automated Perimetry. Single field analysis

Subject ID: 1019, age: 57, eye: OS (left)

Date: 06/10/2011 at 10:07

Duration: 04:54, pause: 00:00

false positives 3.0 %

false negatives 3.0 %

fixation losses 0.0 %

MS 28.2 dB

MD -2.3 dB (p < 95 %)

PSD 4.5 dB (p < 95 %)

VFI 97.3 % (p < 5 %)

GH 0.5 dB

total deviation

Central 24-2  
SITA standard

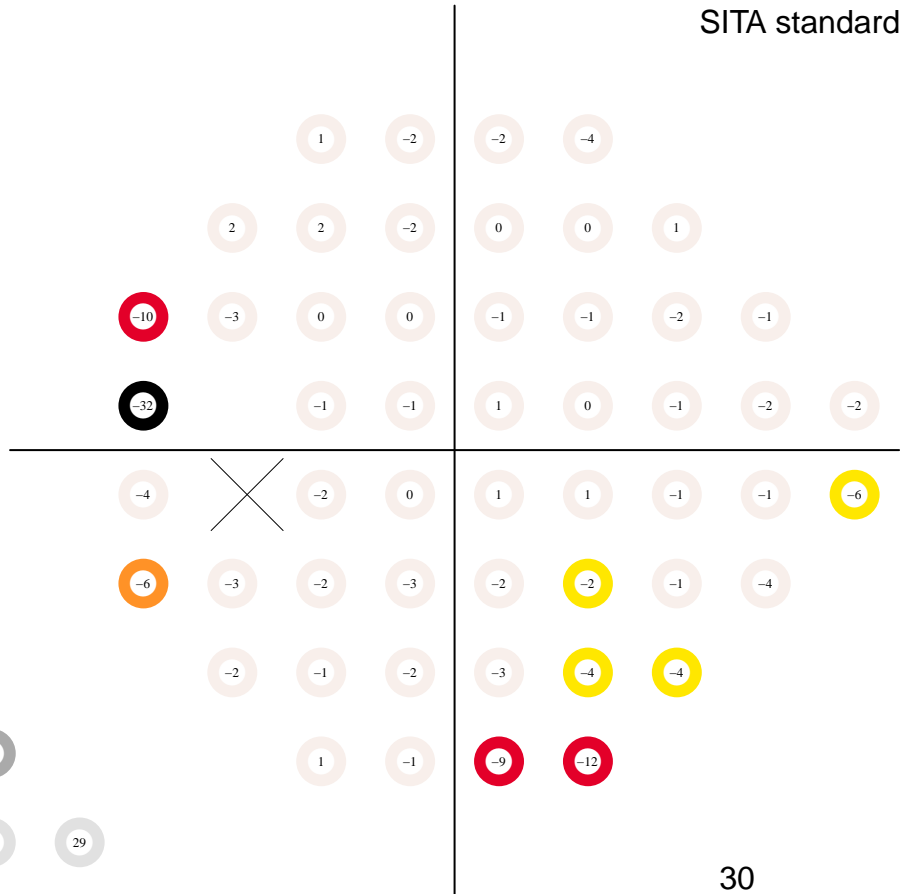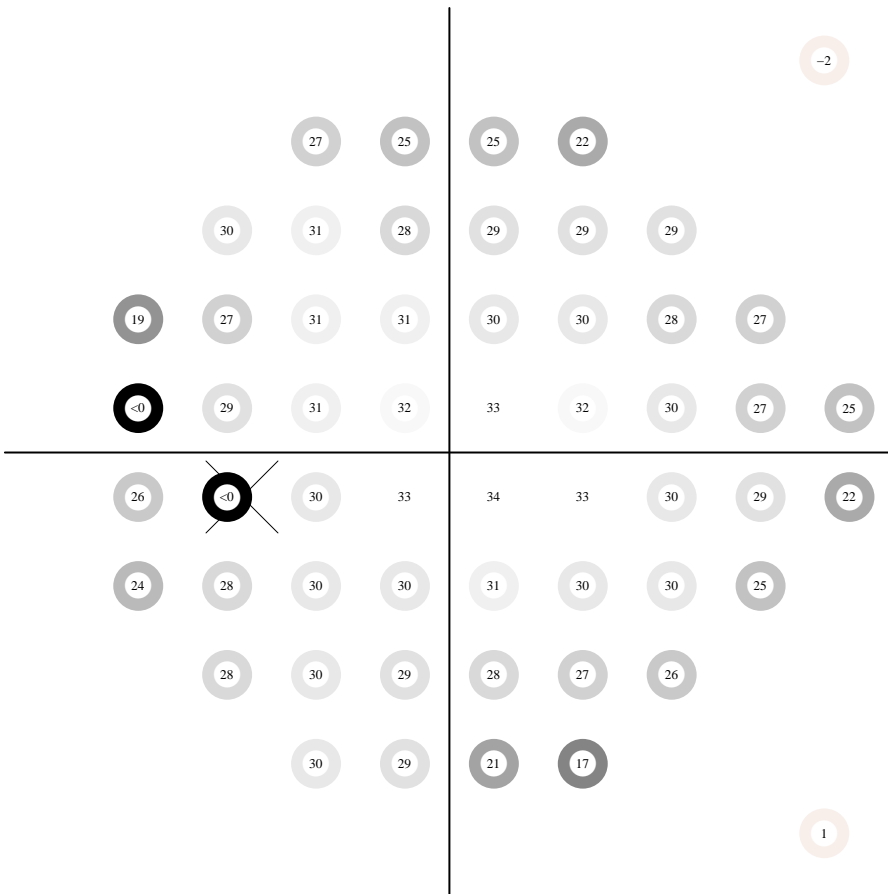

pattern deviation

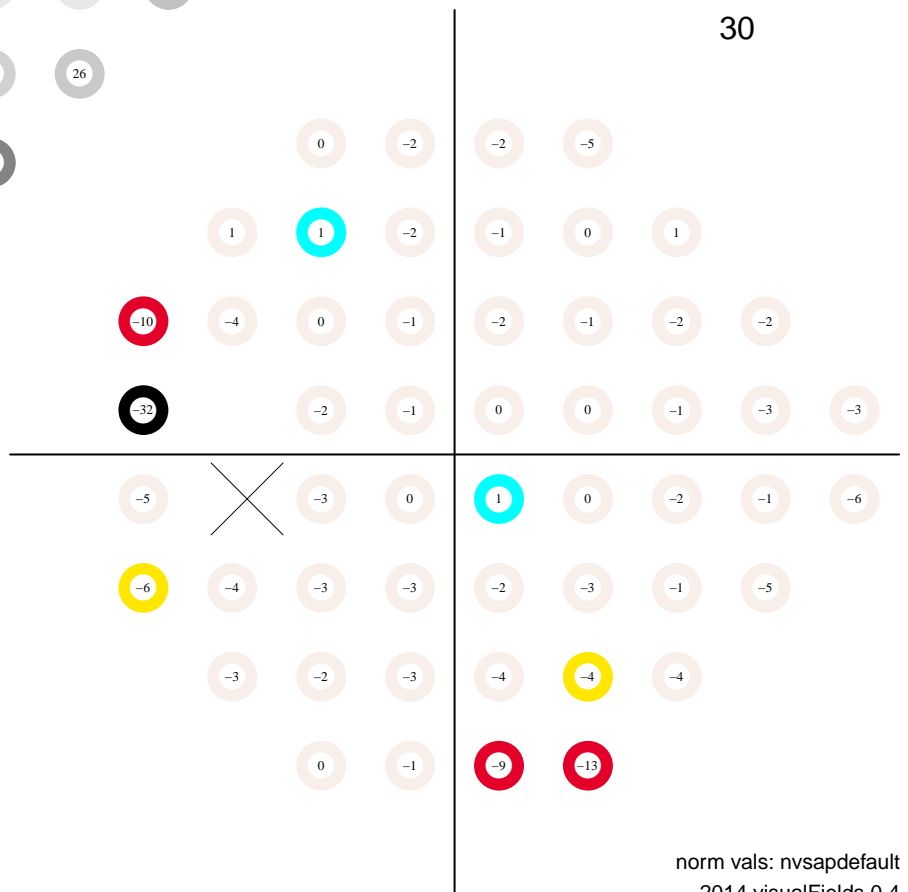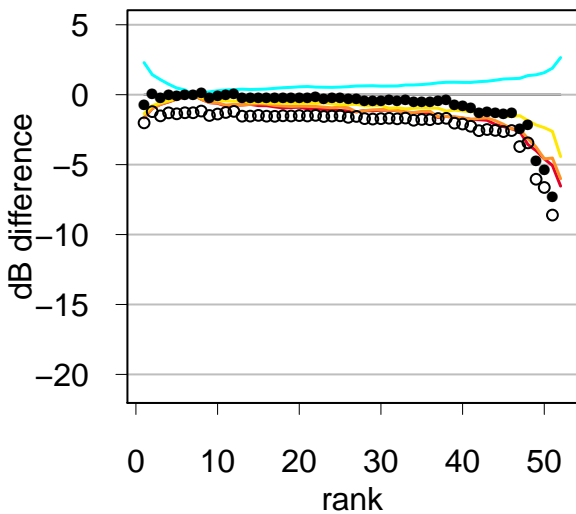

# Static Automated Perimetry. Single field analysis

Subject ID: 1019, age: 58, eye: OS (left)

Date: 11/22/2011 at 12:52

Duration: 05:29, pause: 00:00

false positives 0.0 %

false negatives 5.0 %

fixation losses 0.0 %

MS 25.9 dB

MD -4.6 dB (p < 0.5 %)

PSD 5.0 dB (p < 0.5 %)

VFI 93.4 % (p < 0.5 %)

GH -0.8 dB

total deviation

Central 24-2  
SITA standard

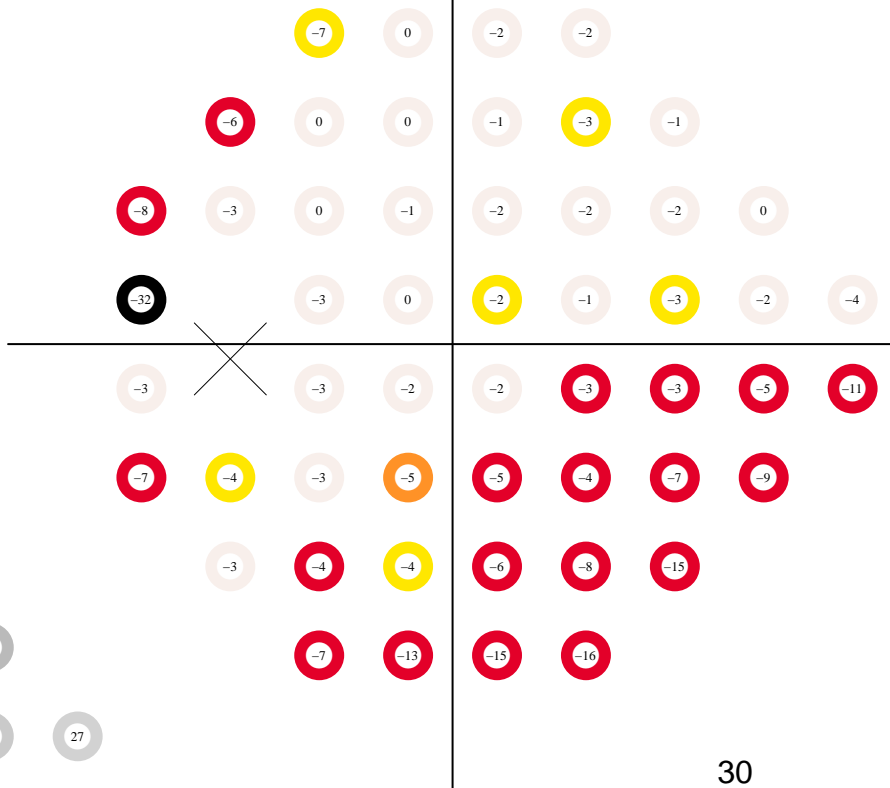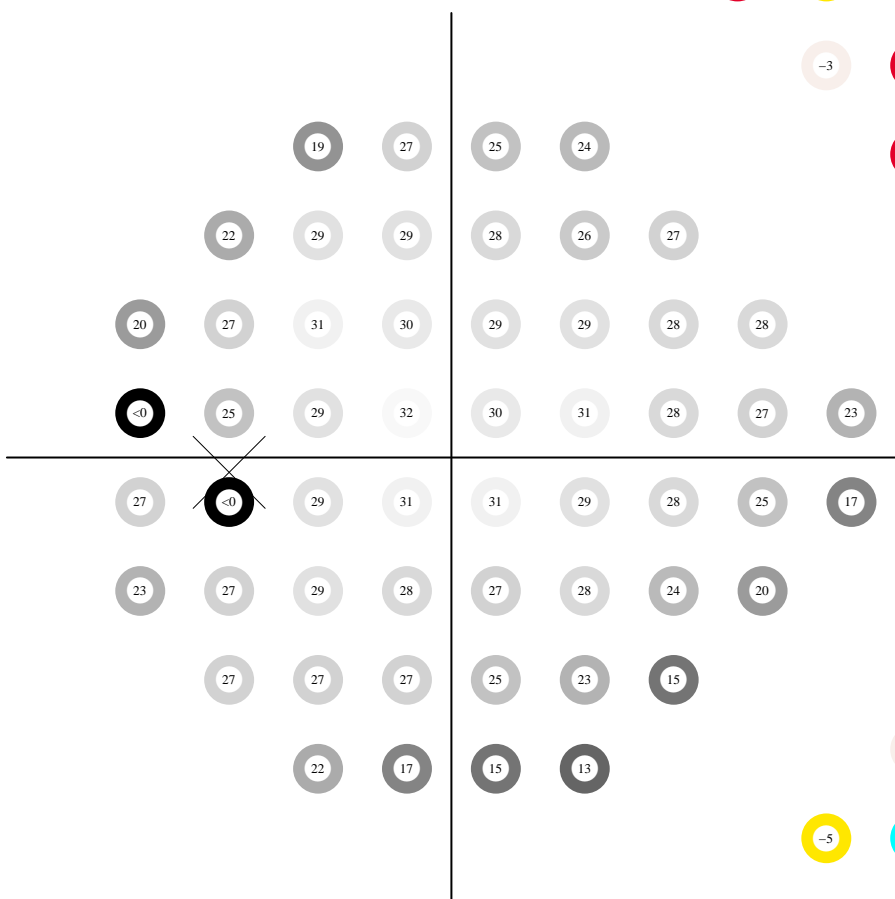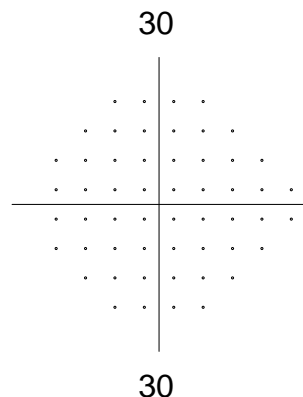

pattern deviation

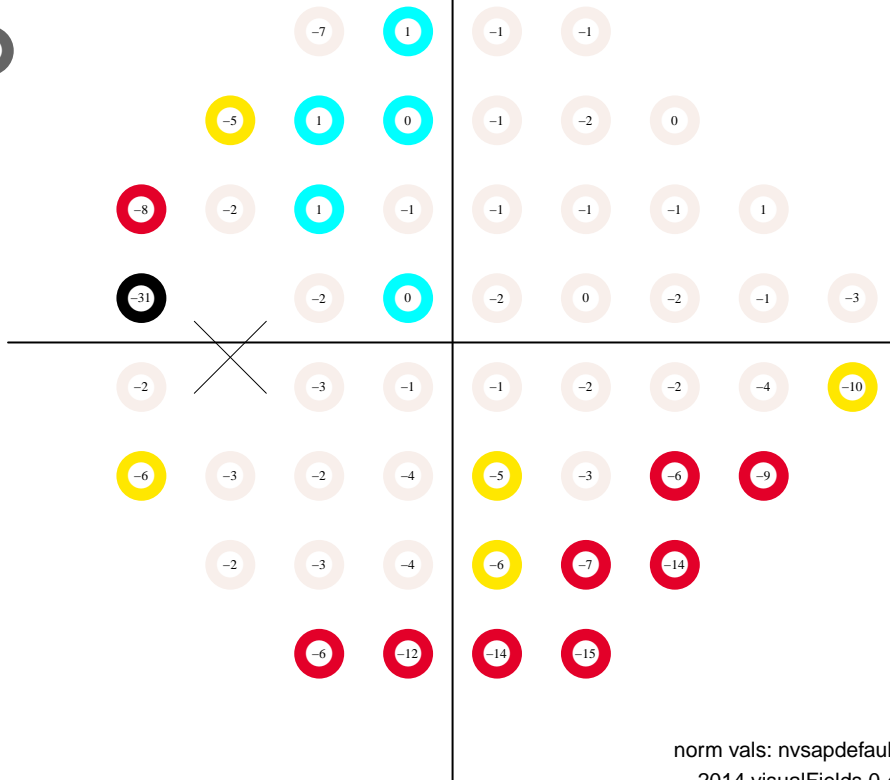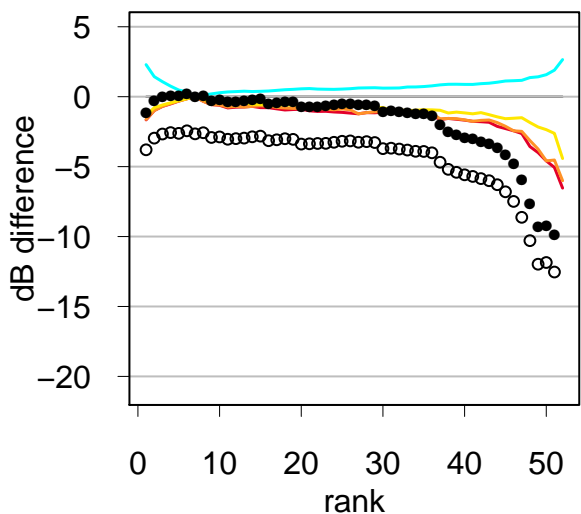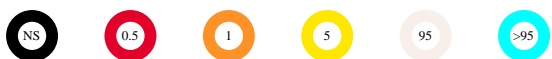



# Static Automated Perimetry. Single field analysis

Subject ID: 1019, age: 58, eye: OS (left)

Date: 02/29/2012 at 14:25

Duration: 05:10, pause: 00:00

false positives 0.0 %

false negatives 0.0 %

fixation losses 26.7 %

MS 28.5 dB

MD -2.0 dB (p < 95 %)

PSD 2.6 dB (p < 95 %)

VFI 97.8 % (p < 95 %)

GH 0.1 dB

total deviation

Central 24-2  
SITA standard

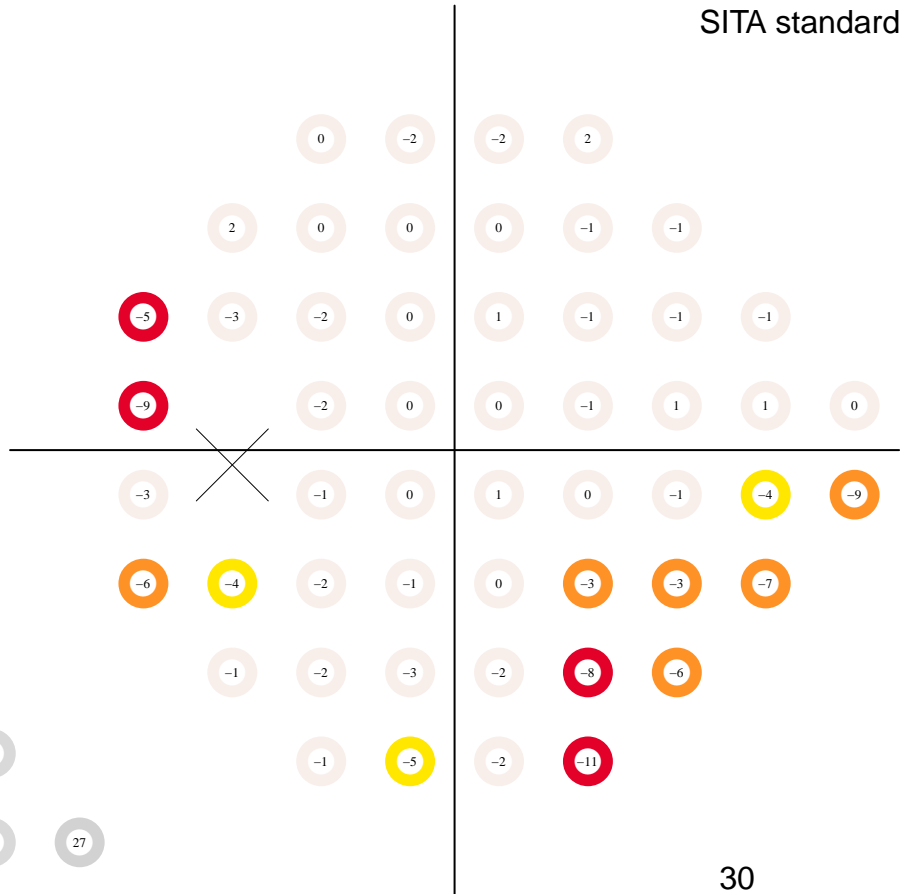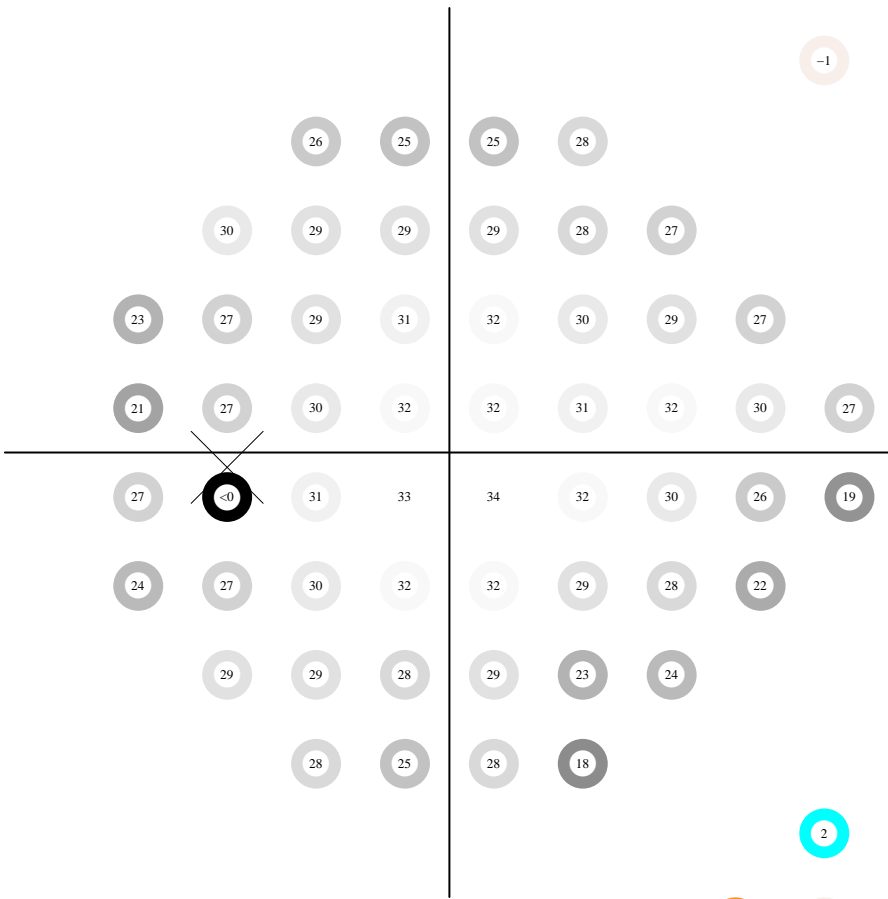

pattern deviation

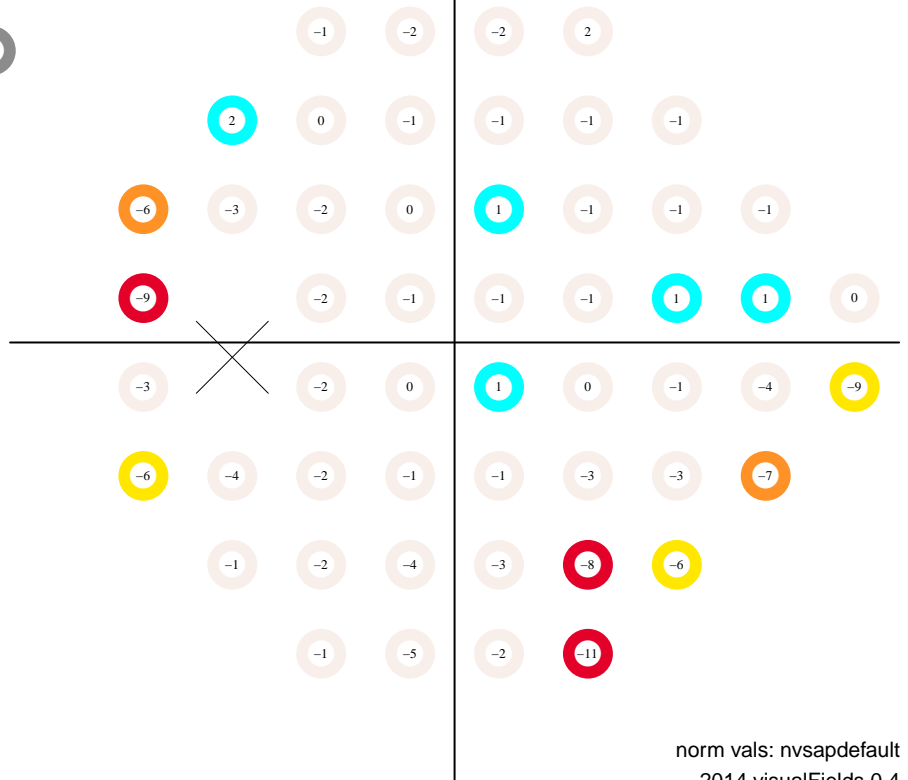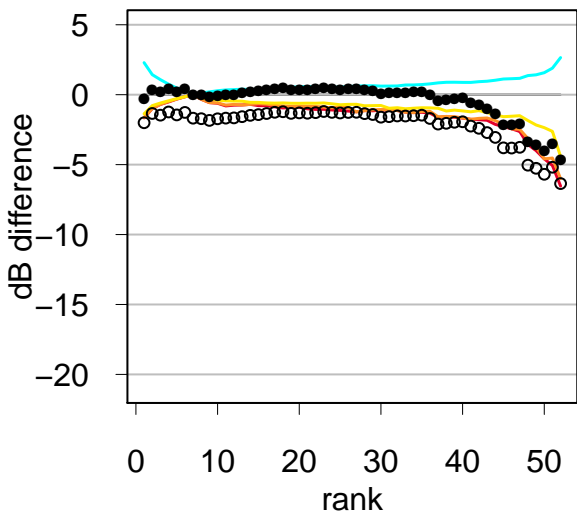

# Static Automated Perimetry. Single field analysis

Subject ID: 1019, age: 58, eye: OS (left)

Date: 06/05/2012 at 10:04

Duration: 04:48, pause: 00:00

false positives 0.0 %

false negatives 0.0 %

fixation losses 21.4 %

MS 28.9 dB

MD -1.6 dB (p < 95 %)

PSD 4.6 dB (p < 95 %)

VFI 97.1 % (p < 5 %)

GH 1.1 dB

total deviation

Central 24-2  
SITA standard

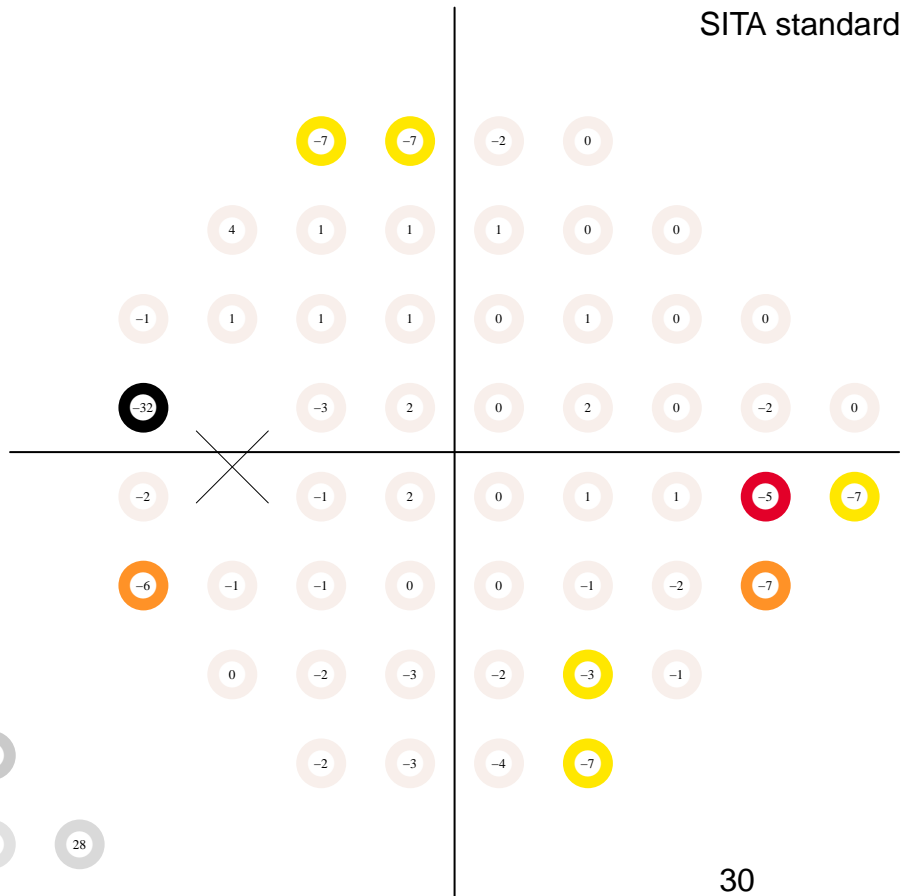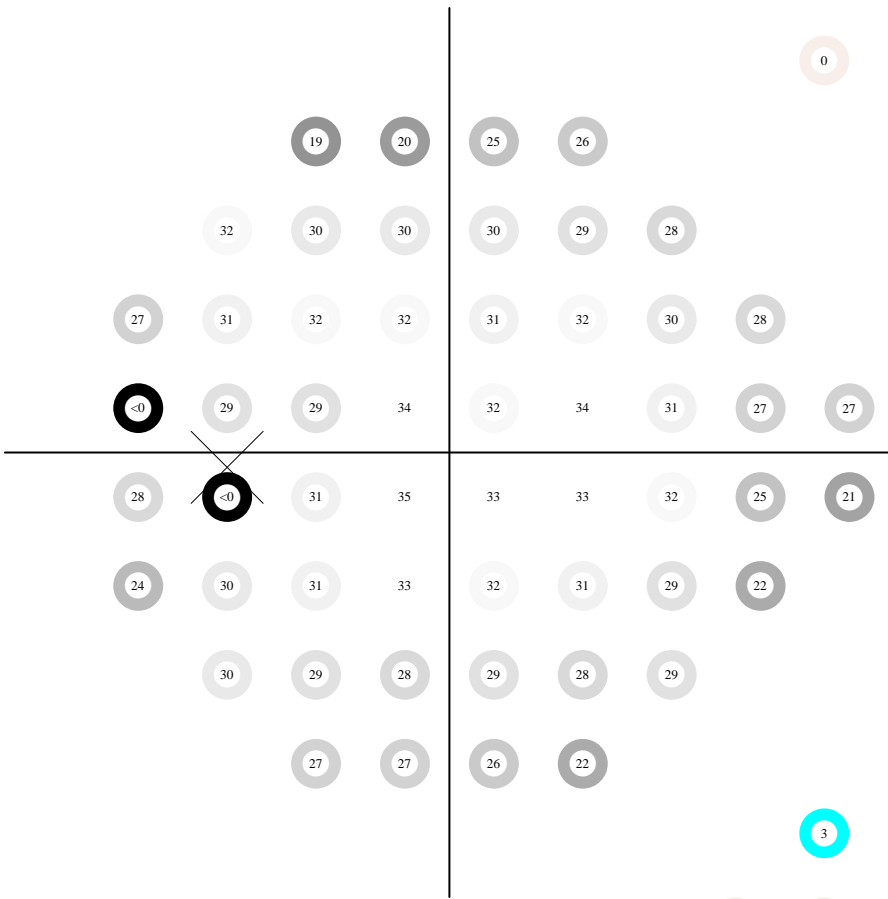

pattern deviation

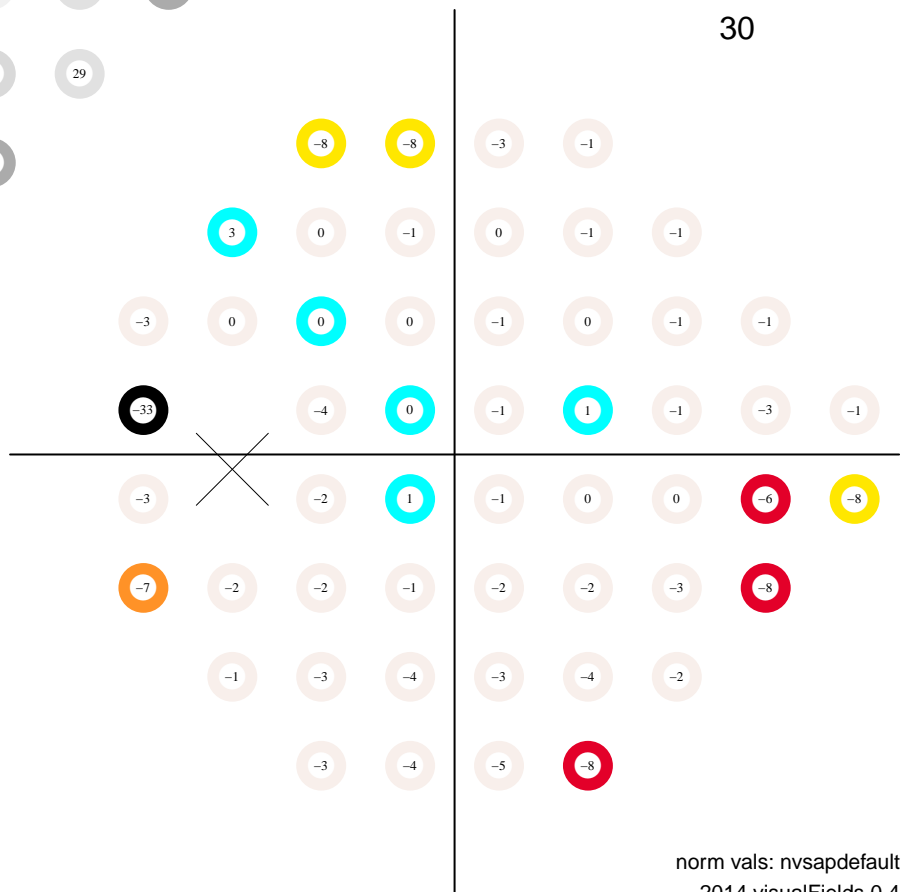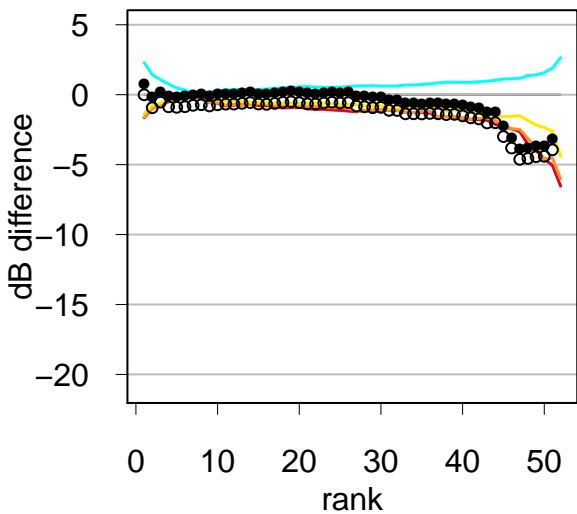

# Static Automated Perimetry. Single field analysis

Subject ID: 1019, age: 58, eye: OS (left)

Date: 06/15/2012 at 8:38:

Duration: 05:31, pause: 00:00

false positives 0.0 %

false negatives 6.0 %

fixation losses 20.0 %

MS 27.1 dB

MD -3.4 dB (p < 0.5 %)

PSD 4.7 dB (p < 0.5 %)

VFI 95.8 % (p < 0.5 %)

GH -0.3 dB

total deviation

Central 24-2  
SITA standard

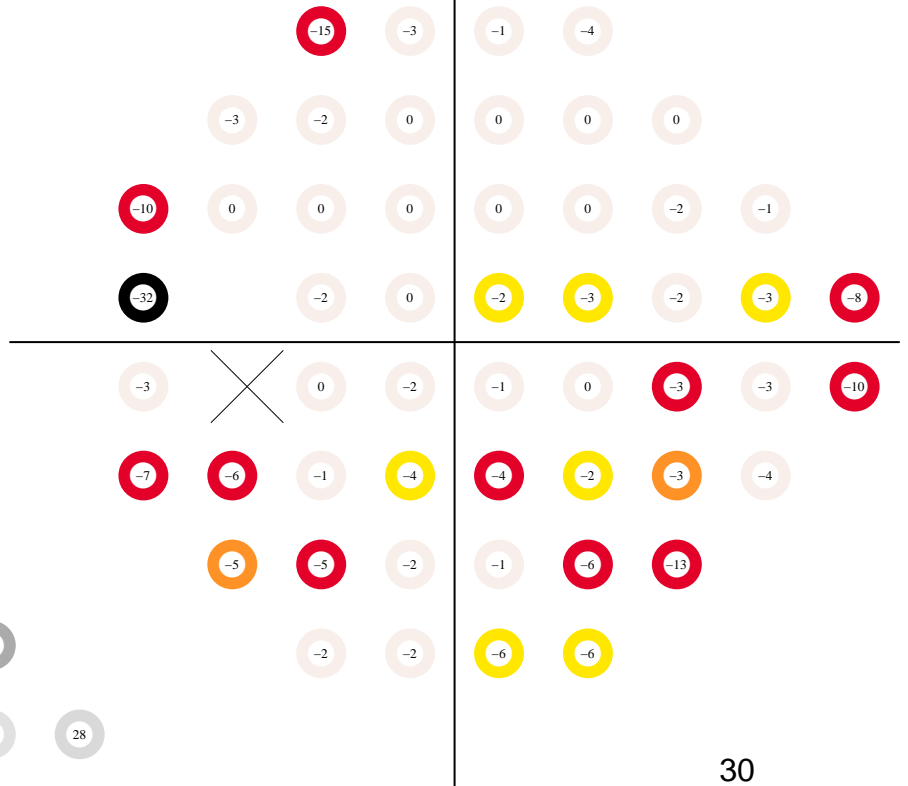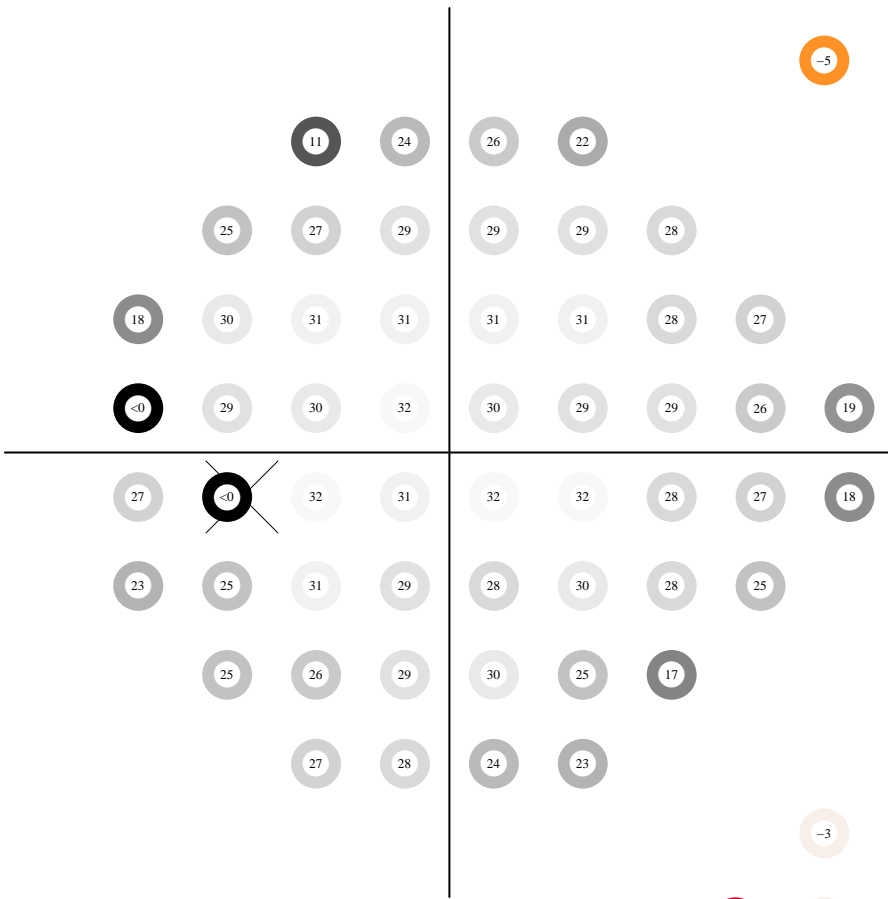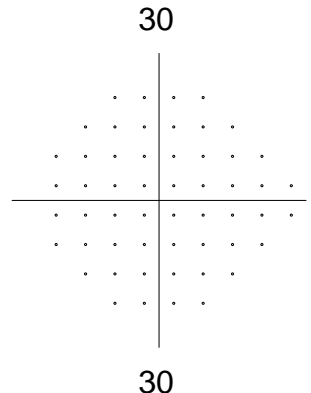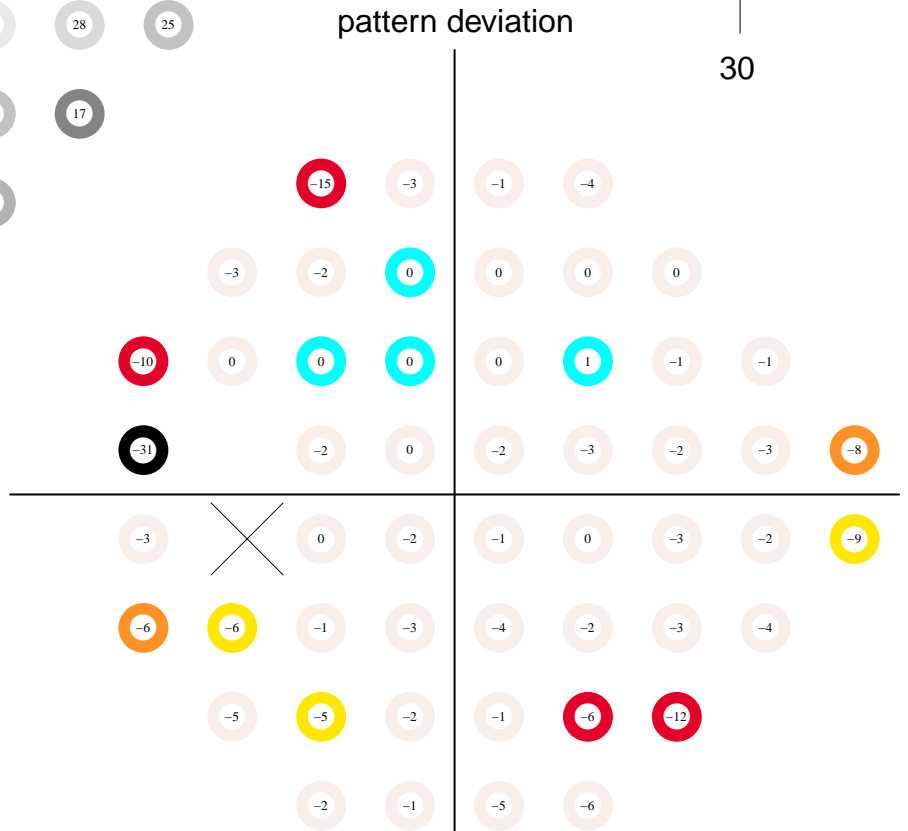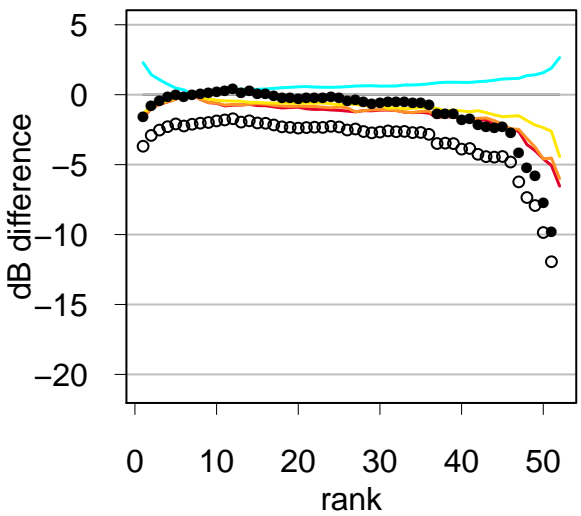

# Static Automated Perimetry. Single field analysis

Subject ID: 1019, age: 59, eye: OS (left)

Date: 12/18/2012 at 10:51

Duration: 06:19, pause: 00:00

false positives 3.0 %

false negatives 0.0 %

fixation losses 6.7 %

MS 26.8 dB

MD -3.6 dB (p < 0.5 %)

PSD 6.6 dB (p < 0.5 %)

VFI 93.7 % (p < 0.5 %)

GH 0.6 dB

total deviation

Central 24-2  
SITA standard

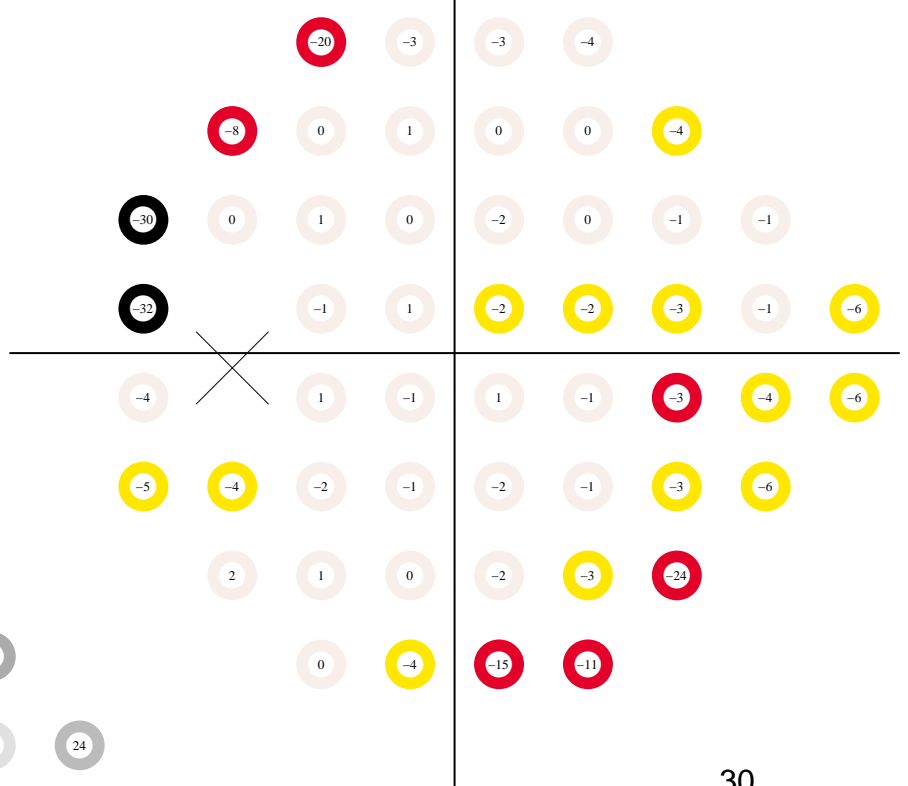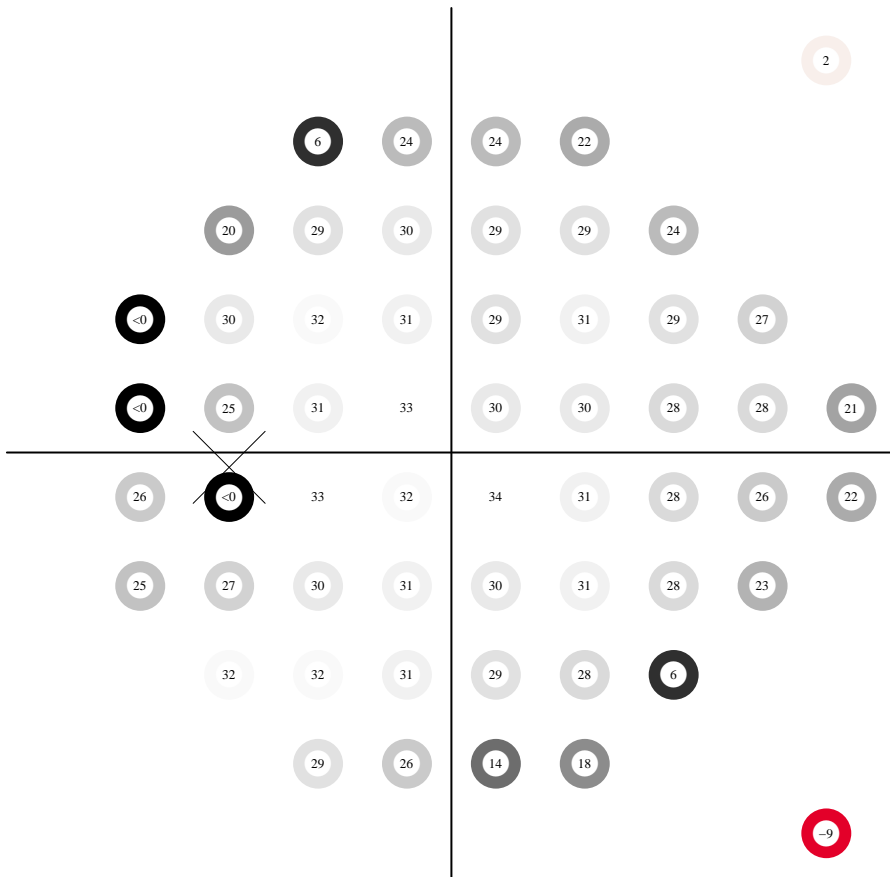

pattern deviation

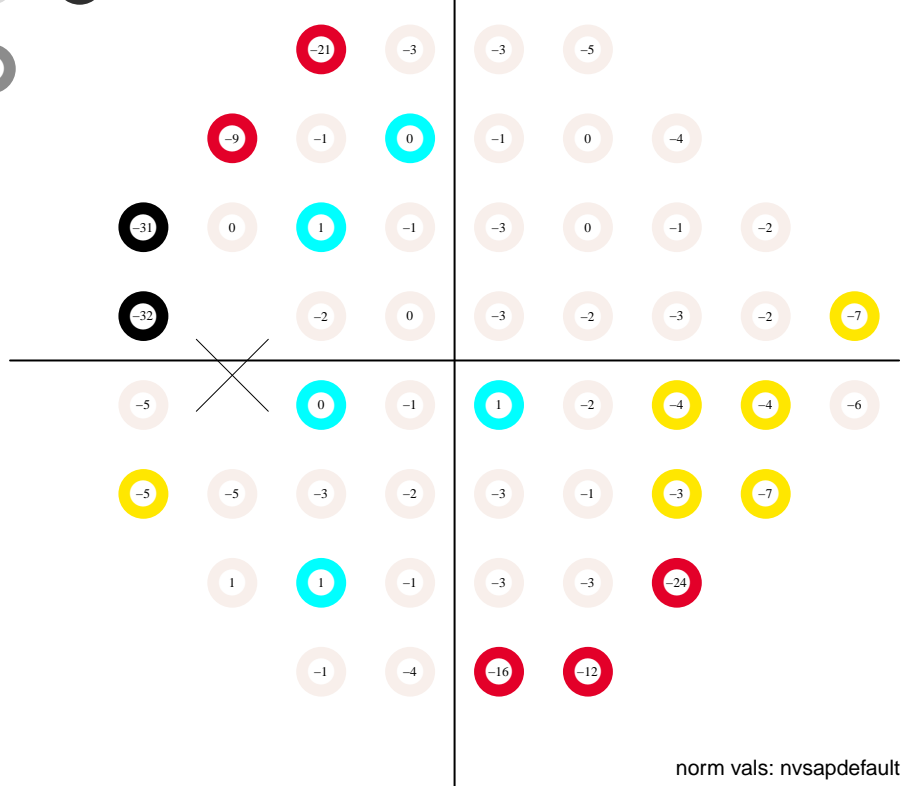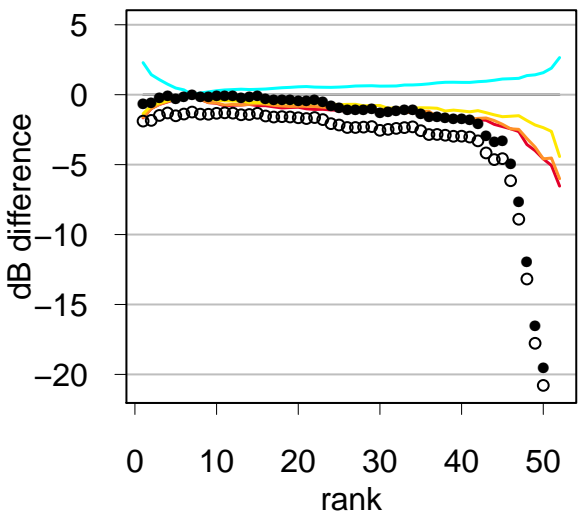

# Static Automated Perimetry. Single field analysis

Subject ID: 1019, age: 59, eye: OS (left)

Date: 03/19/2013 at 11:11

Duration: 04:57, pause: 00:00

false positives 1.0 %

false negatives 0.0 %

fixation losses 0.0 %

MS 26.8 dB

MD -3.6 dB (p < 0.5 %)

PSD 5.8 dB (p < 0.5 %)

VFI 94.8 % (p < 0.5 %)

GH -0.3 dB

total deviation

Central 24-2  
SITA standard

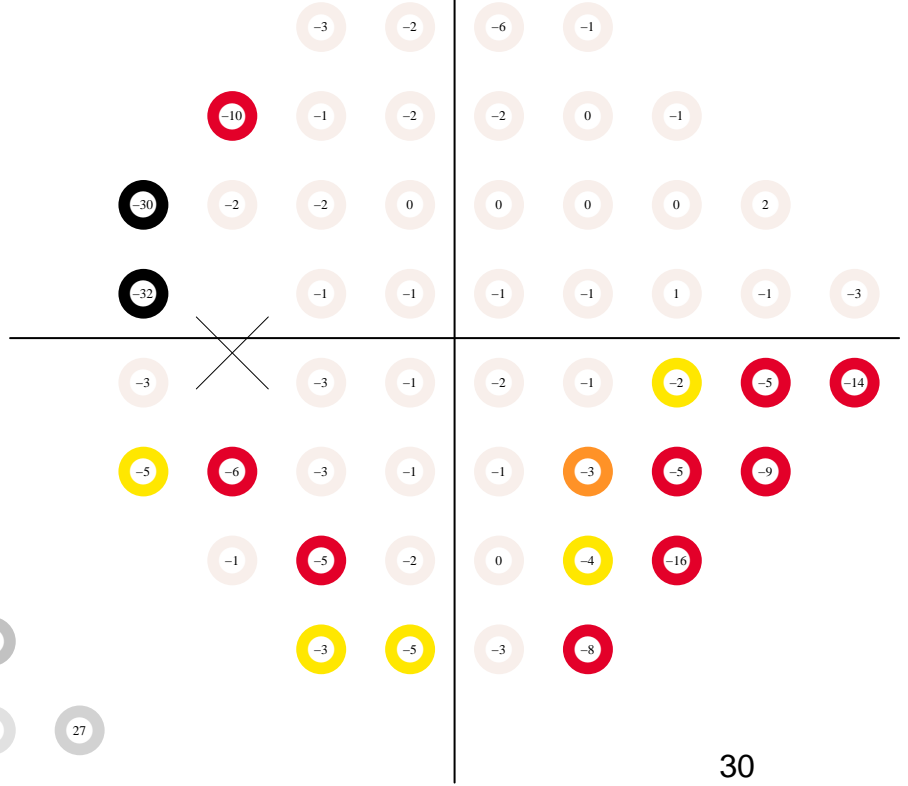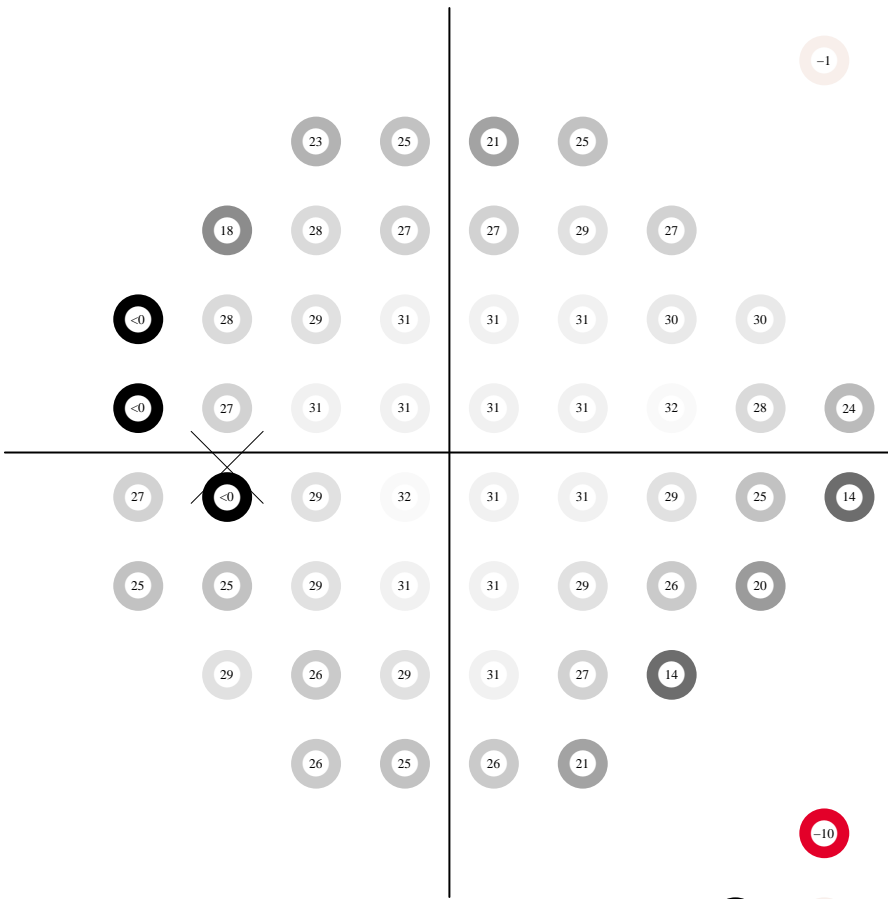

pattern deviation

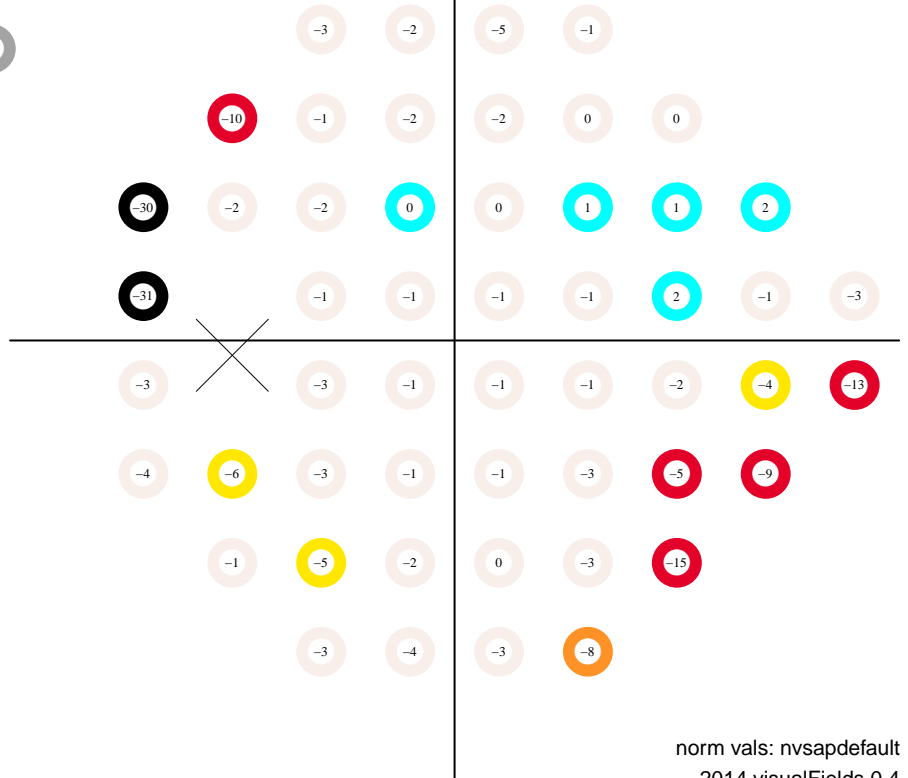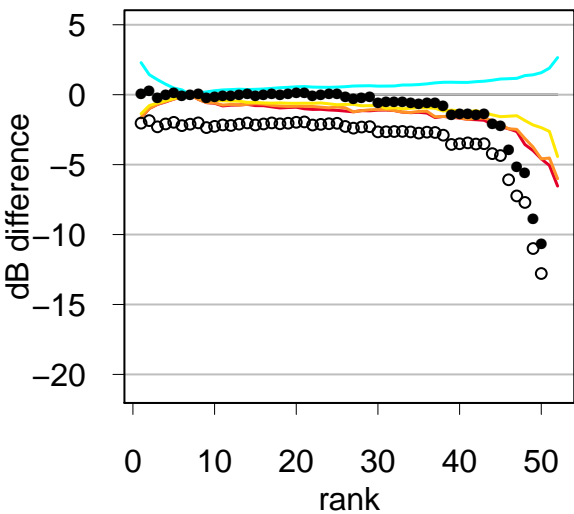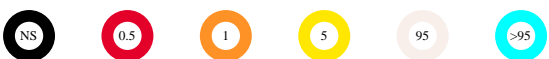

# Static Automated Perimetry. Single field analysis

Subject ID: 1019, age: 59, eye: OS (left)

Date: 06/11/2013 at 11:18

Duration: 05:24, pause: 00:00

false positives 1.0 %

false negatives 0.0 %

fixation losses 0.0 %

MS 26.6 dB

MD -3.8 dB (p < 0.5 %)

PSD 5.7 dB (p < 0.5 %)

VFI 94.2 % (p < 0.5 %)

GH -0.4 dB

total deviation

Central 24-2  
SITA standard

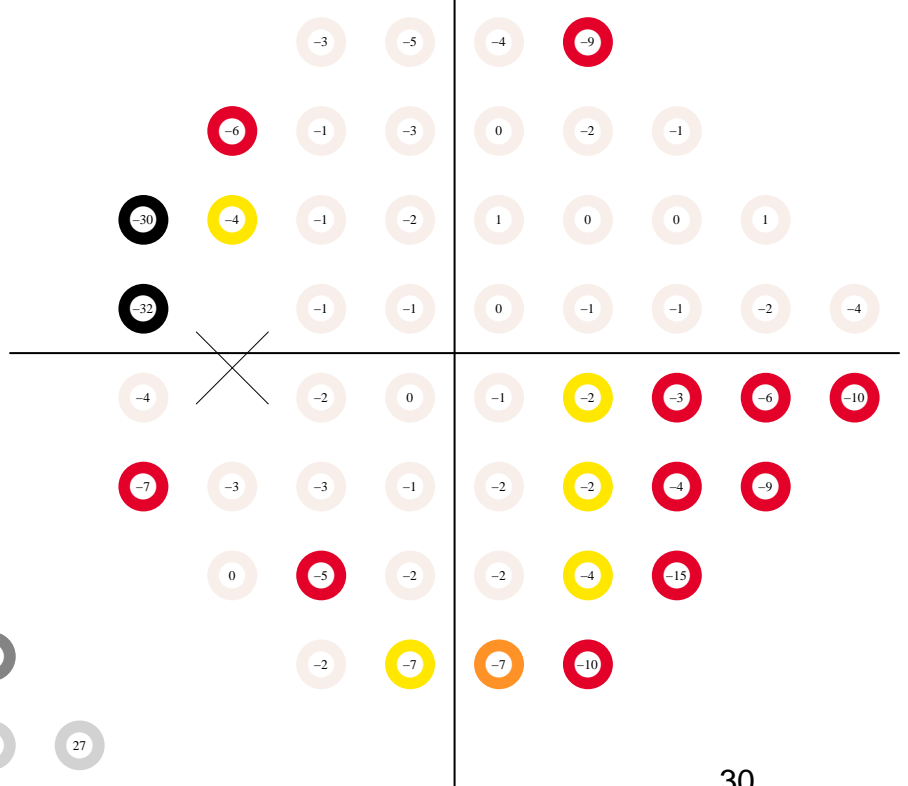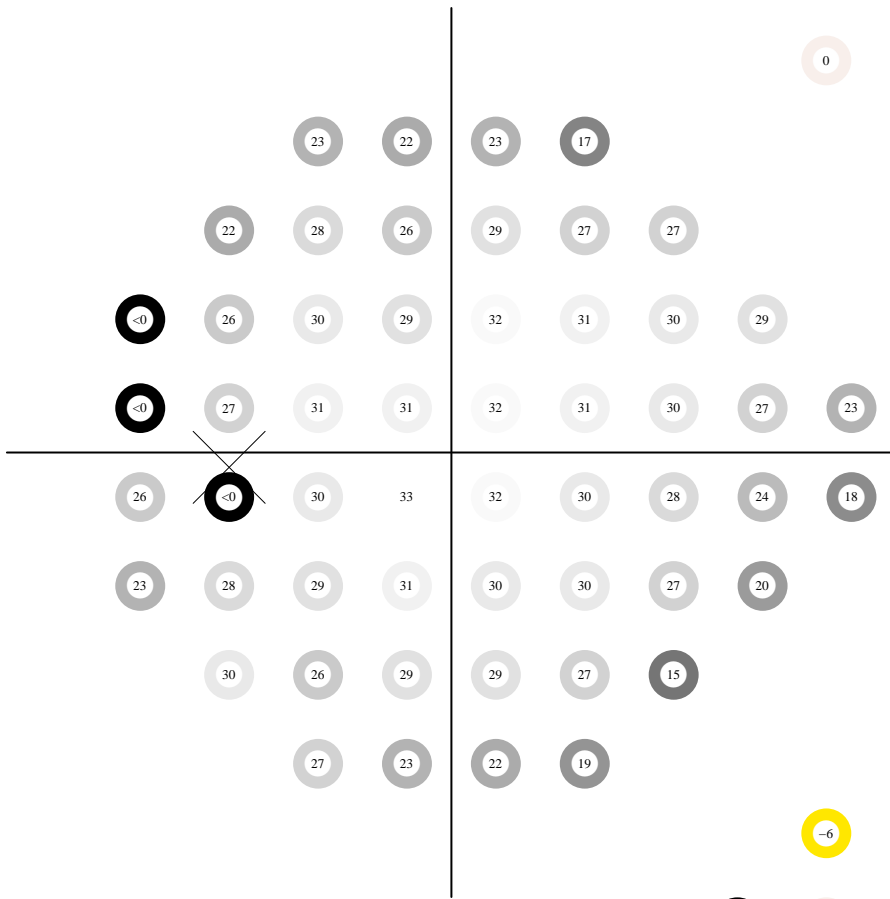

pattern deviation

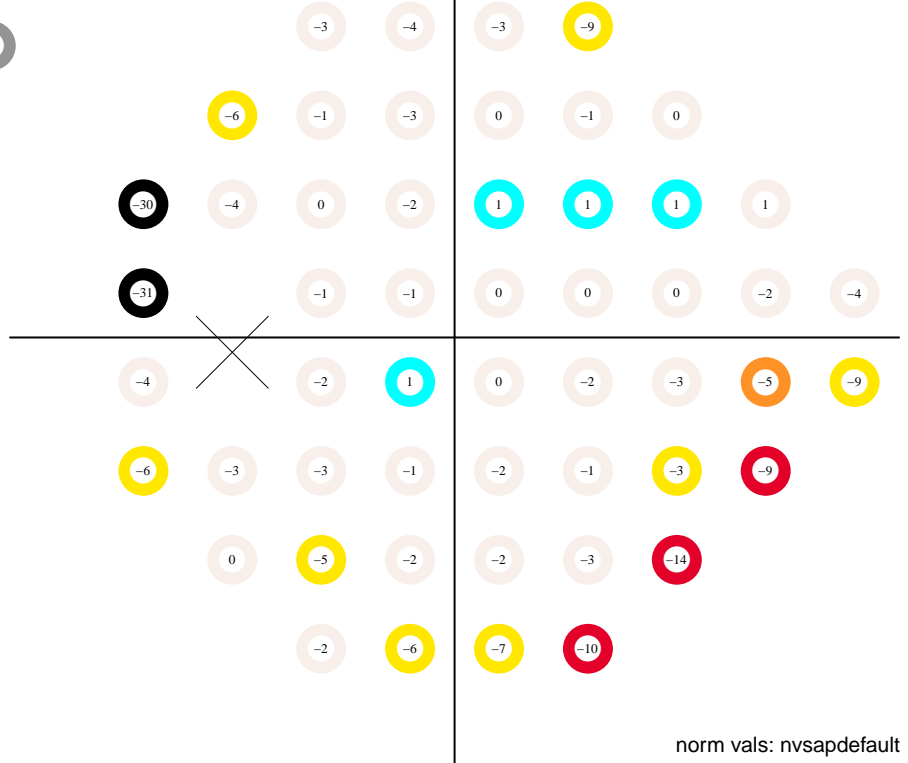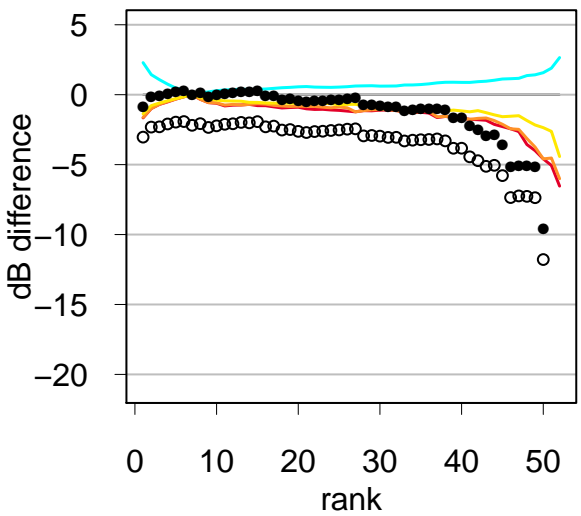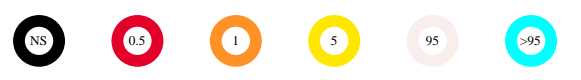

# Static Automated Perimetry. Single field analysis

Subject ID: 1021, age: 69, eye: OS (left)

Date: 07/21/2004 at 7:43:

Duration: 05:14, pause: 00:00

false positives 1.0 %

false negatives 0.0 %

fixation losses 15.4 %

MS 31.9 dB

MD 2.1 dB (p < 100 %)

PSD 1.5 dB (p < 100 %)

VFI 99.7 % (p < 95 %)

GH 4.3 dB

total deviation

Central 24-2  
SITA standard

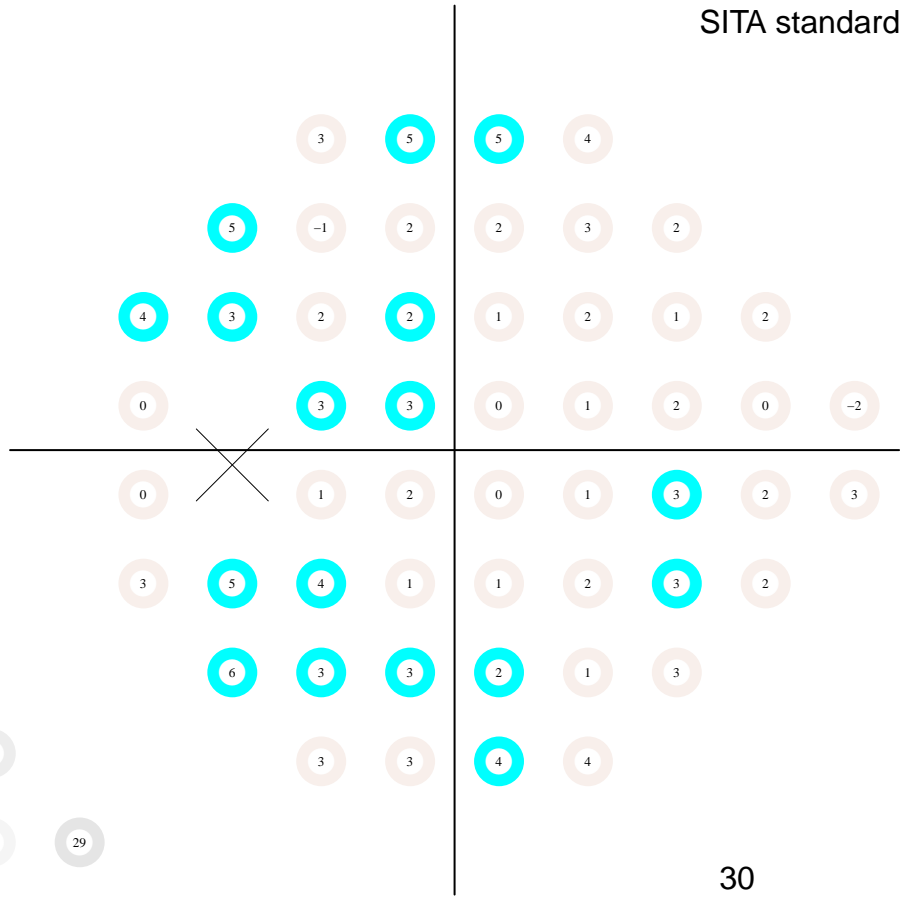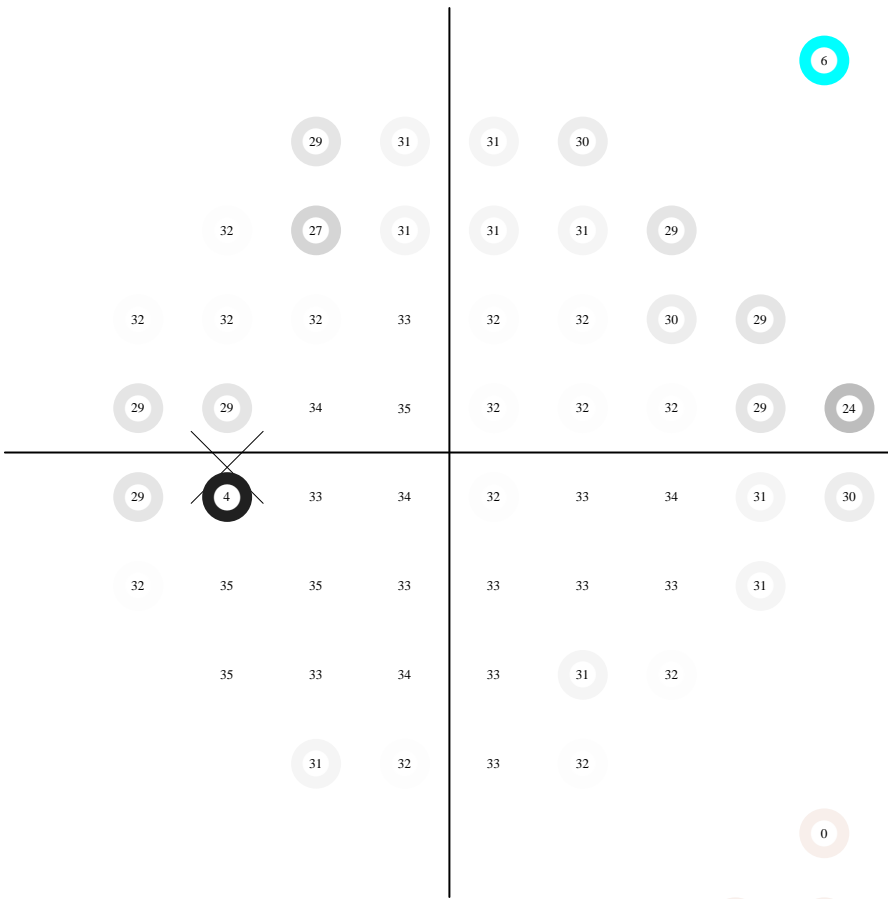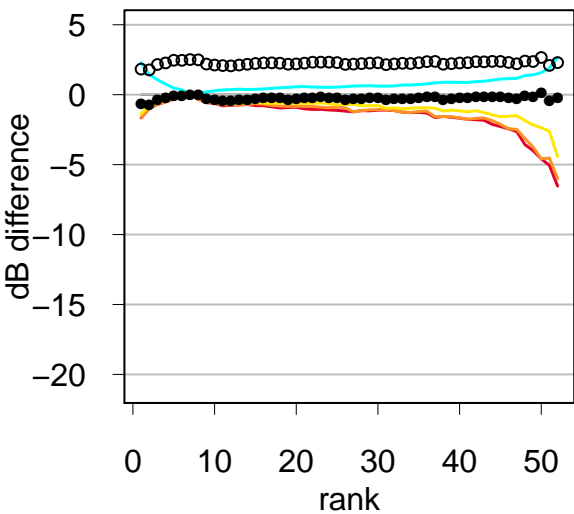

pattern deviation

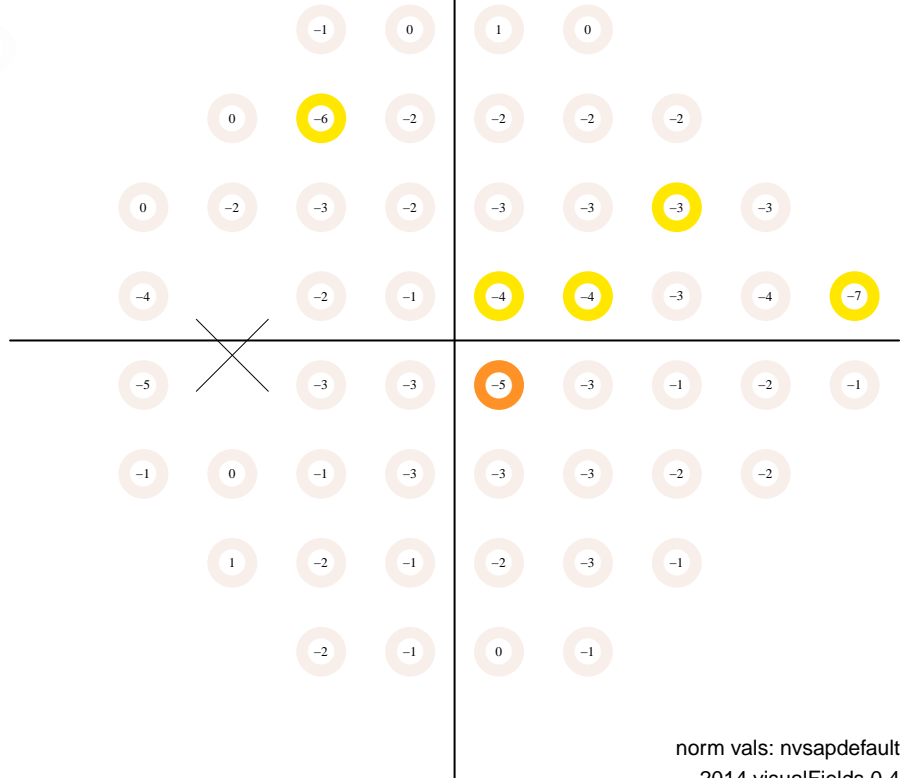

# Static Automated Perimetry. Single field analysis

Subject ID: 1021, age: 70, eye: OS (left)

Date: 08/10/2005 at 7:26:

Duration: 04:23, pause: 00:00

false positives 0.0 %

false negatives 0.0 %

fixation losses 7.1 %

MS 32.3 dB

MD 2.6 dB (p < 100 %)

PSD 1.4 dB (p < 100 %)

VFI 99.3 % (p < 95 %)

GH 4.8 dB

total deviation

Central 24-2  
SITA standard

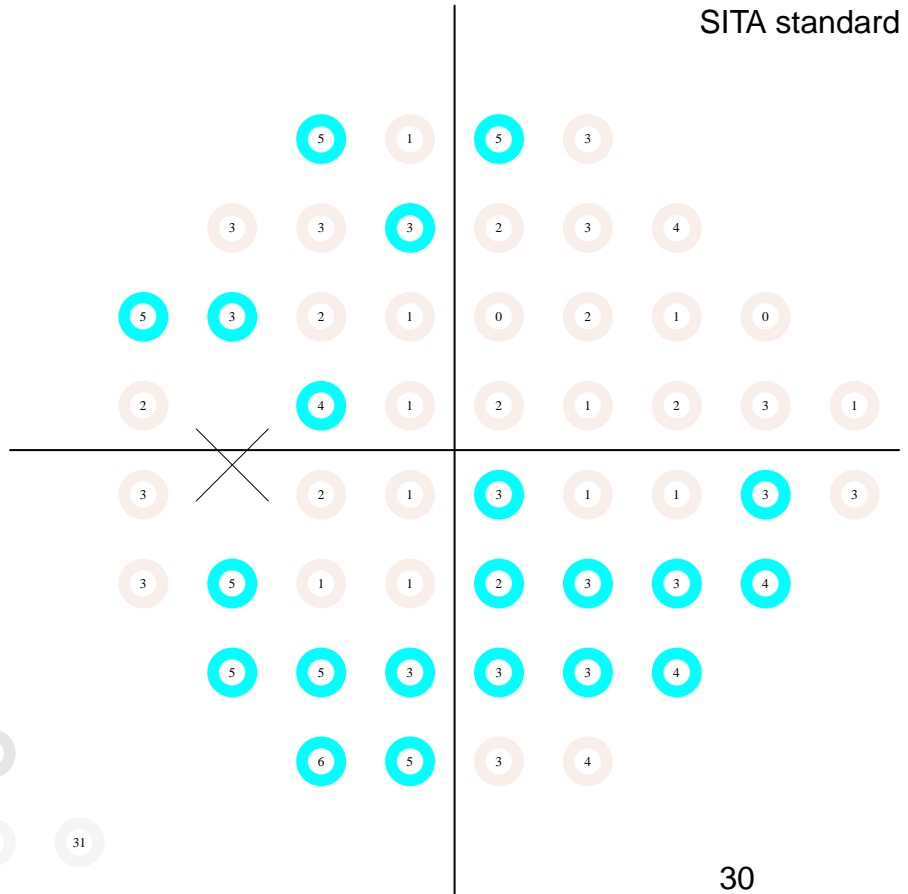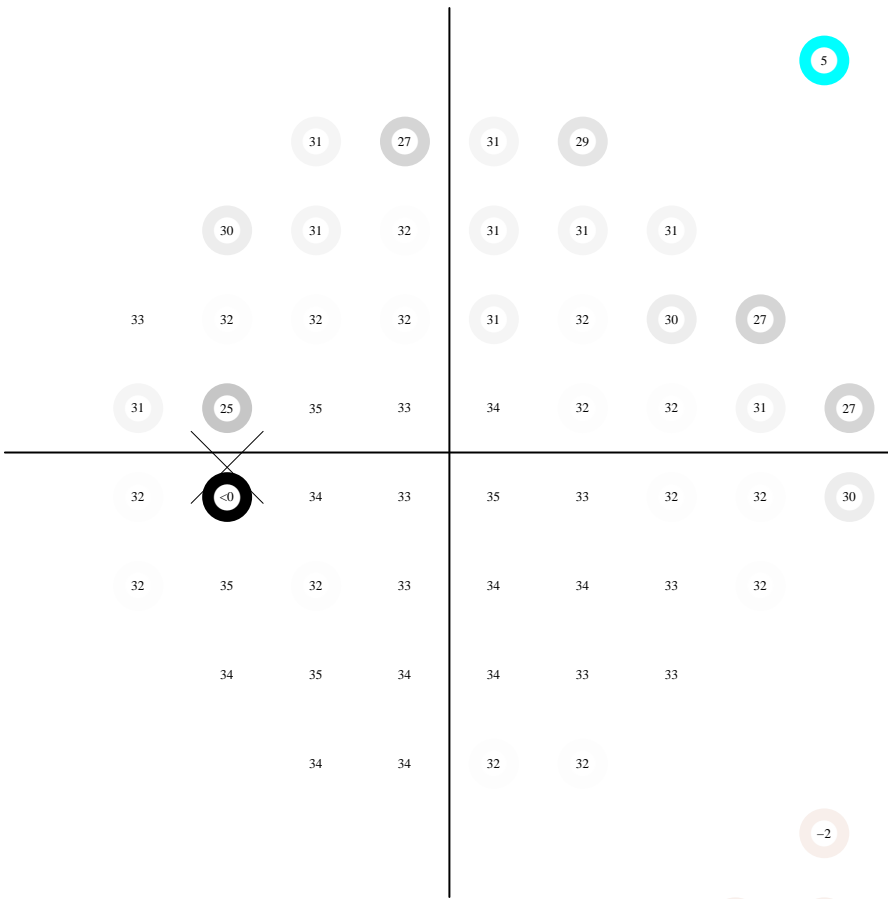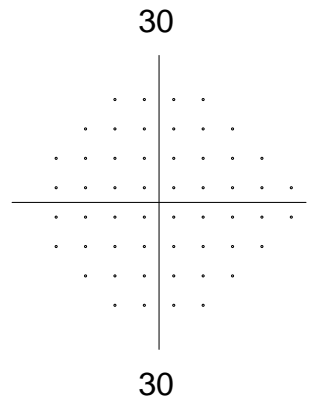

pattern deviation

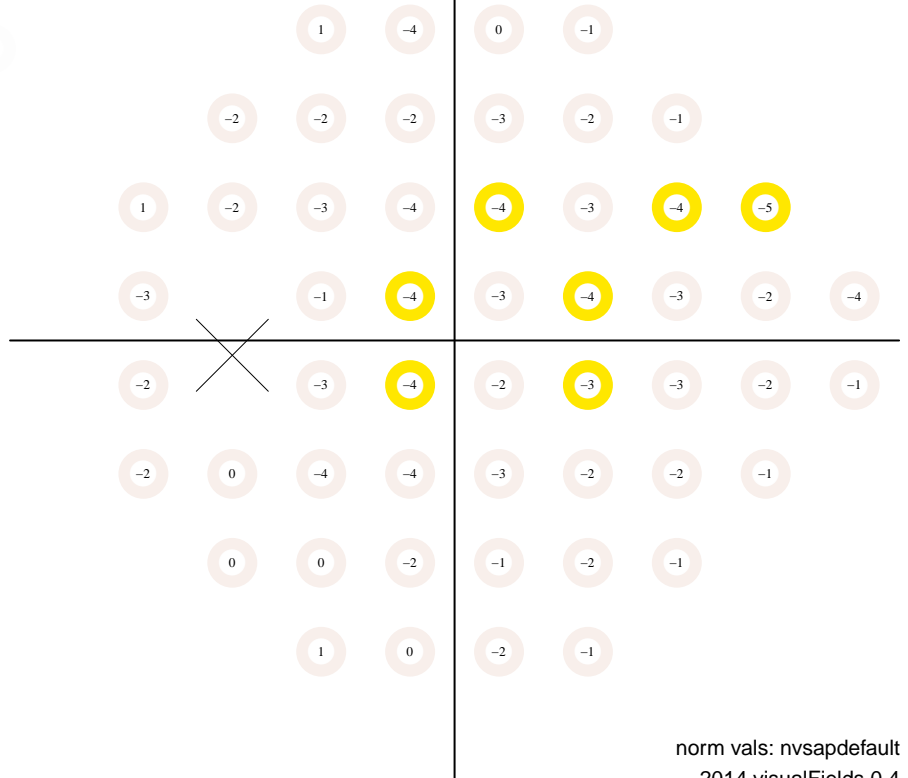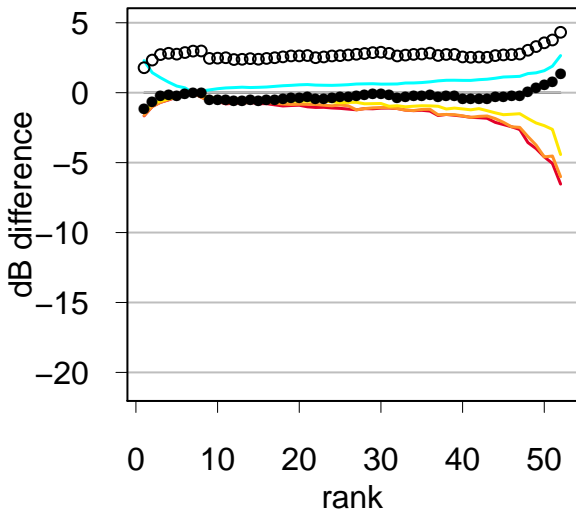



# Static Automated Perimetry. Single field analysis

Subject ID: 1021, age: 71, eye: OS (left)

Date: 09/29/2006 at 7:38:

Duration: 04:52, pause: 00:00

false positives 4.0 %

false negatives 0.0 %

fixation losses 0.0 %

MS 31.3 dB

MD 1.6 dB (p < 95 %)

PSD 1.5 dB (p < 95 %)

VFI 99.8 % (p < 95 %)

GH 3.7 dB

total deviation

Central 24-2  
SITA standard

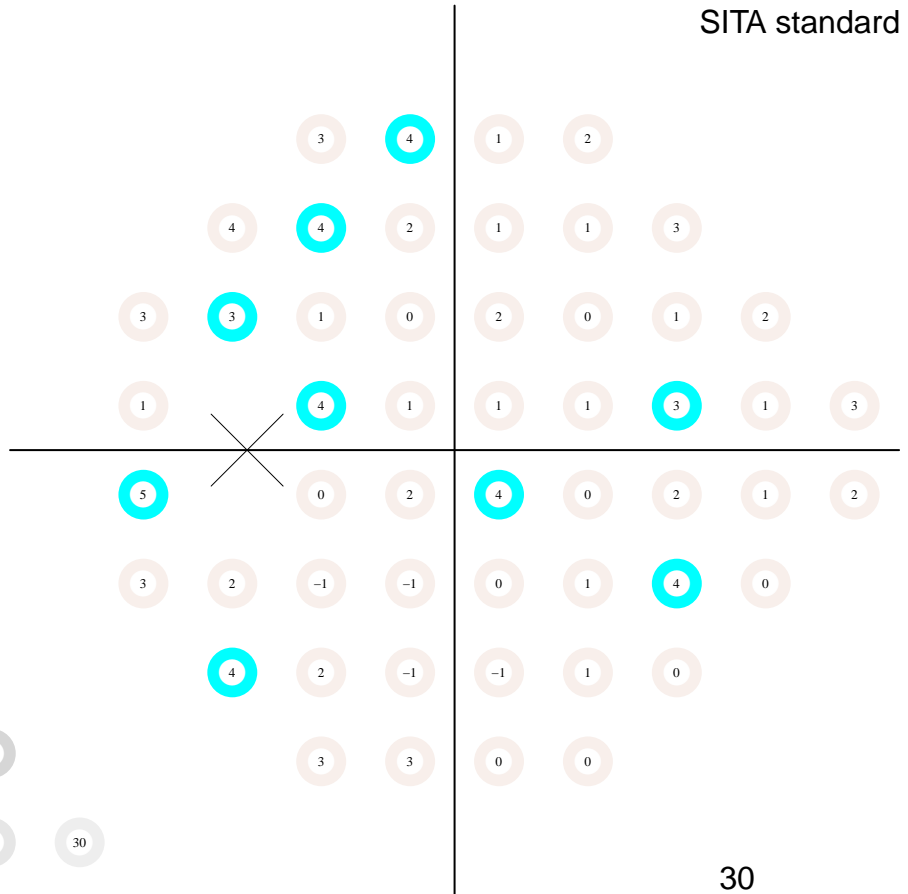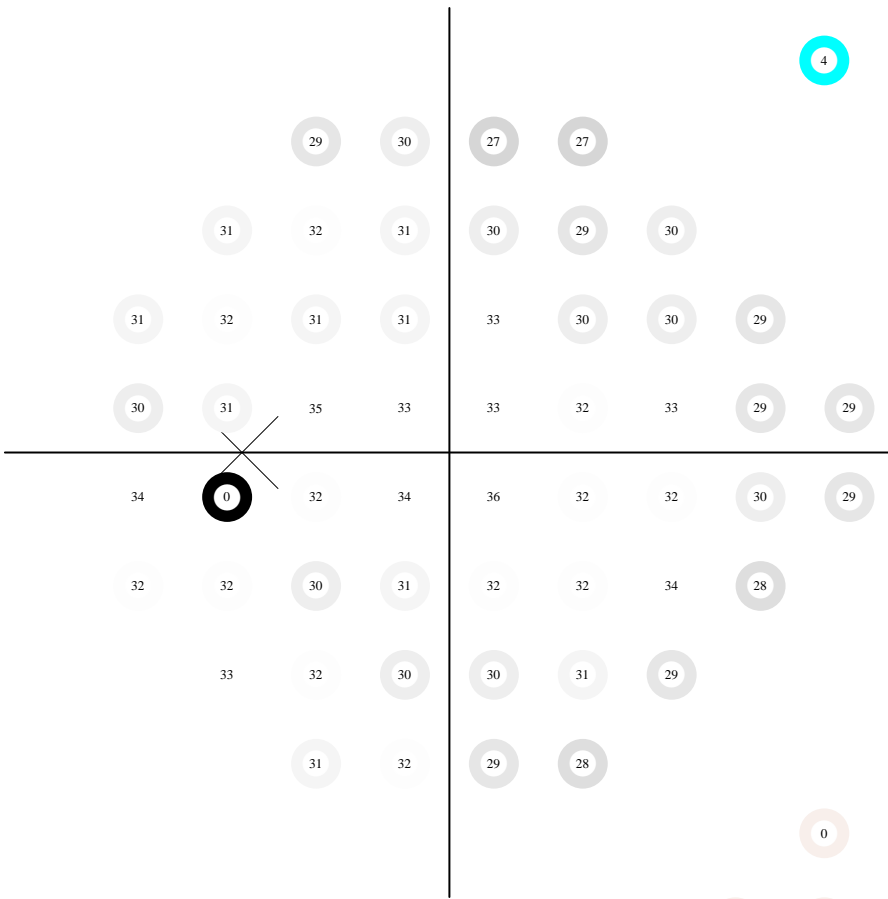

pattern deviation

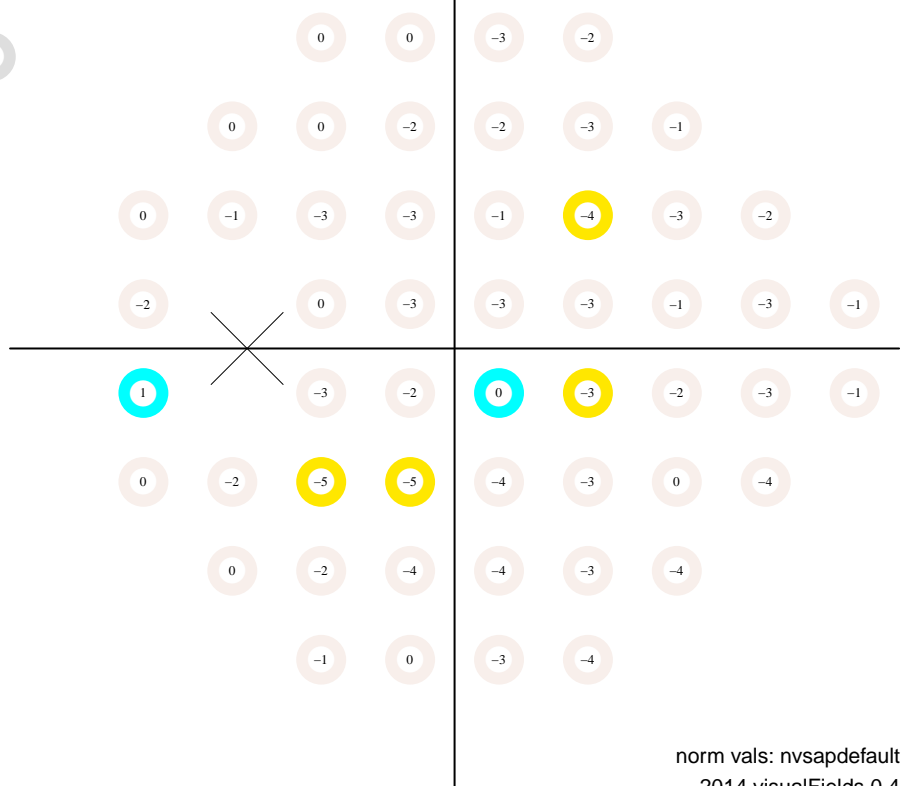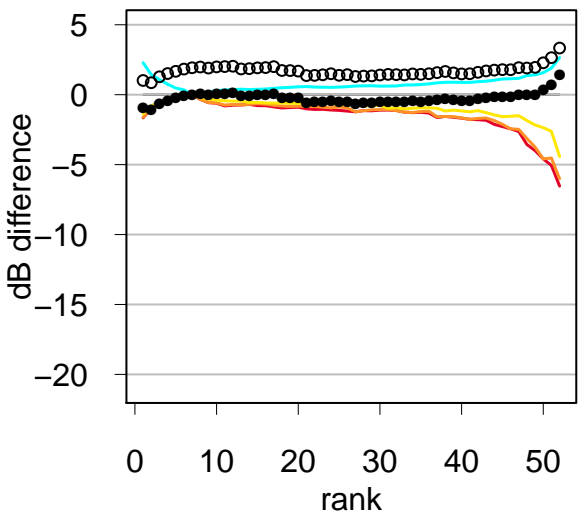

# Static Automated Perimetry. Single field analysis

Subject ID: 1021, age: 71, eye: OS (left)

Date: 04/03/2007 at 7:24:

Duration: 04:40, pause: 00:00

false positives 6.0 %

false negatives 0.0 %

fixation losses 0.0 %

MS 31.4 dB

MD 1.7 dB (p < 100 %)

PSD 1.3 dB (p < 100 %)

VFI 100.0 % (p < 95 %)

GH 3.4 dB

total deviation

Central 24-2  
SITA standard

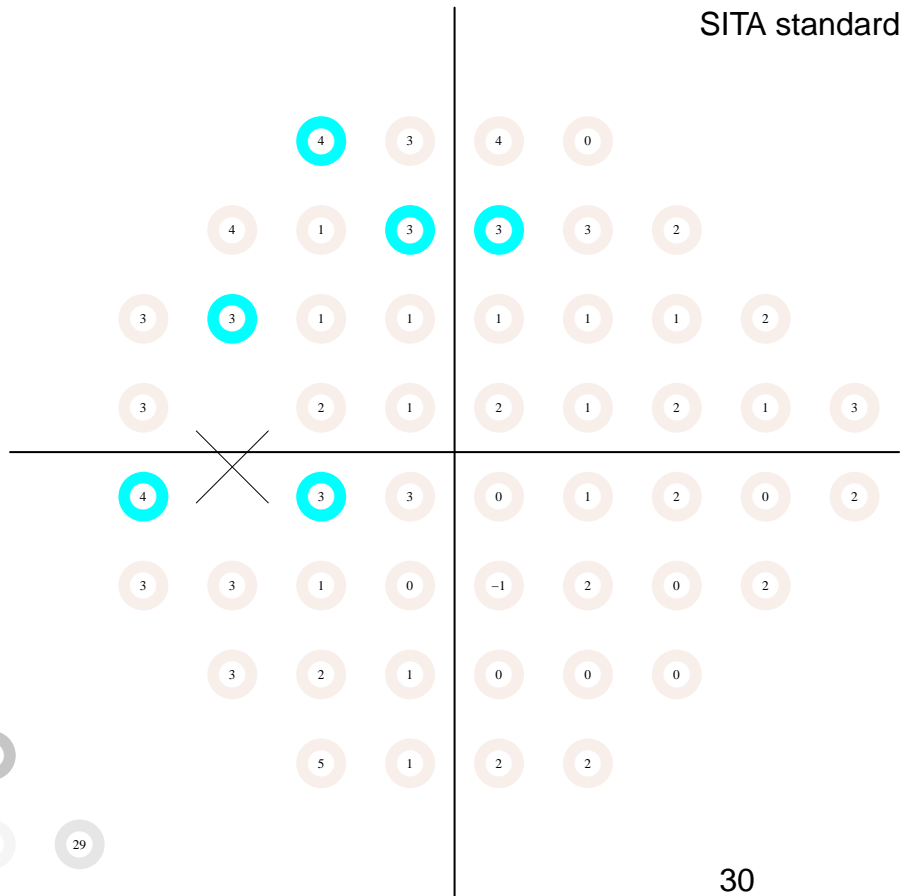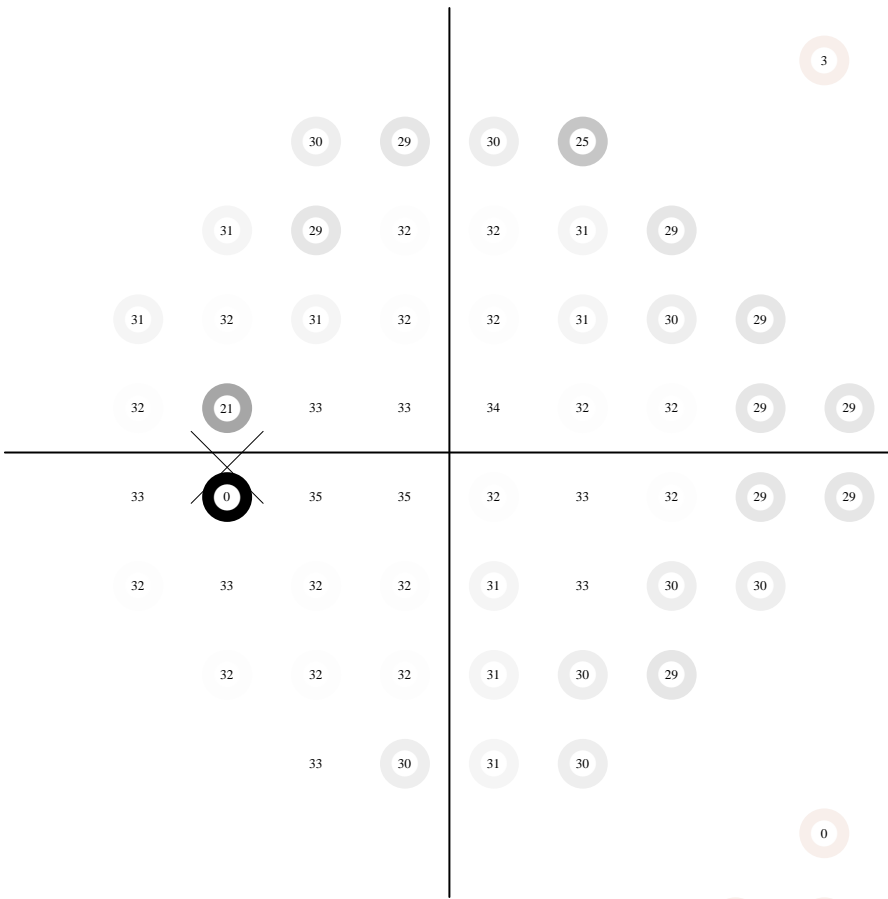

pattern deviation

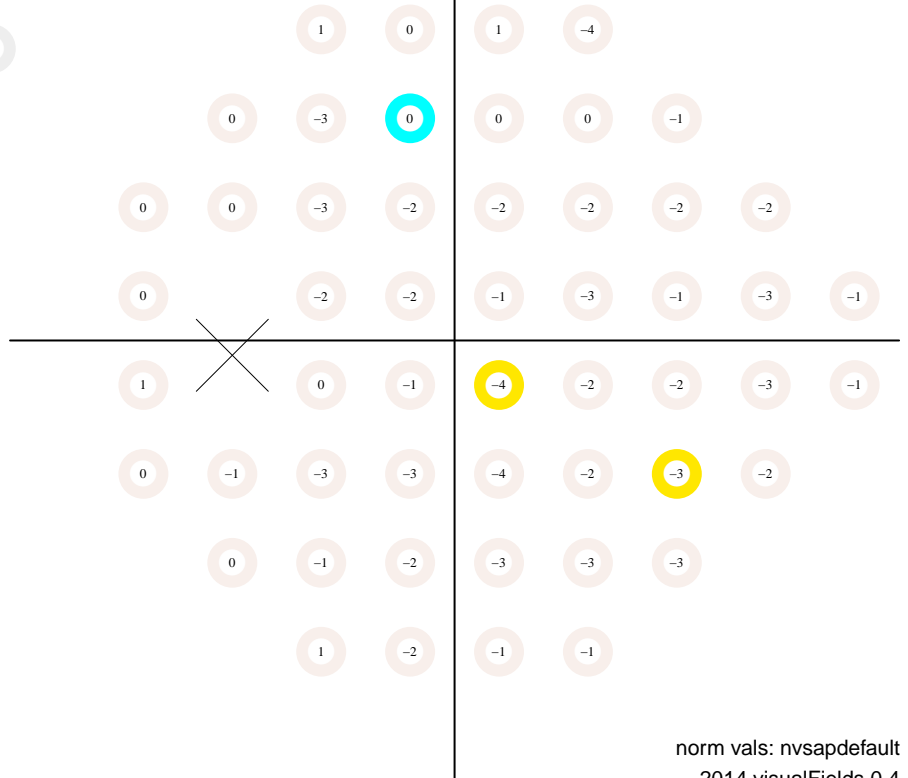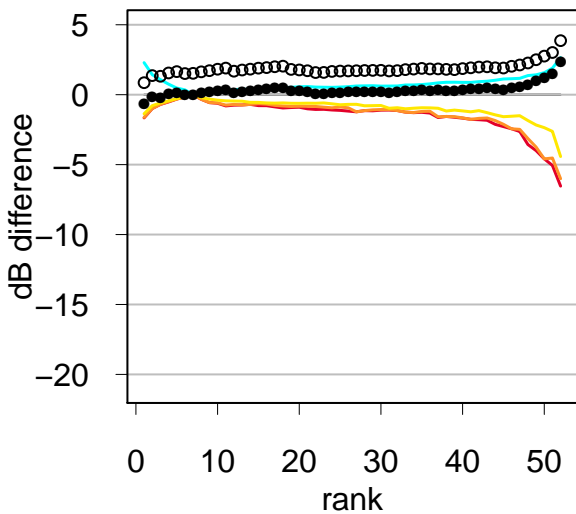

# Static Automated Perimetry. Single field analysis

Subject ID: 1021, age: 72, eye: OS (left)

Date: 10/02/2007 at 8:24:

Duration: 04:50, pause: 00:00

false positives 8.0 %

false negatives 0.0 %

fixation losses 7.1 %

MS 31.5 dB

MD 1.9 dB (p < 100 %)

PSD 1.7 dB (p < 100 %)

VFI 99.6 % (p < 95 %)

GH 4.6 dB

total deviation

Central 24-2  
SITA standard

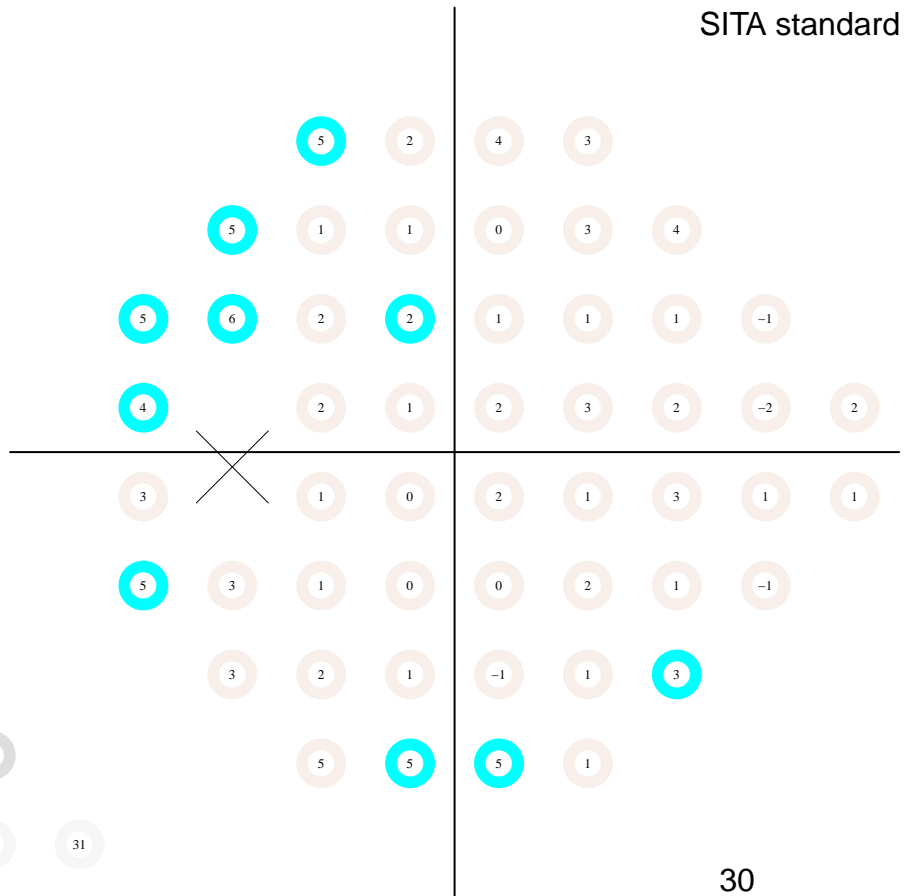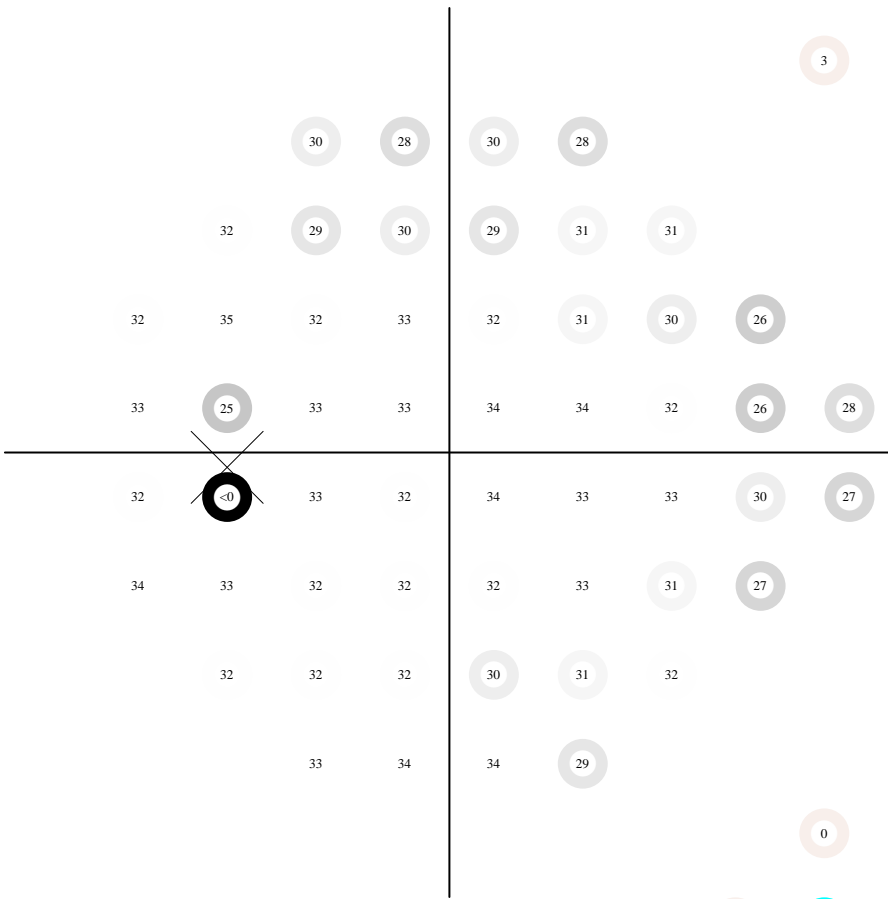

pattern deviation

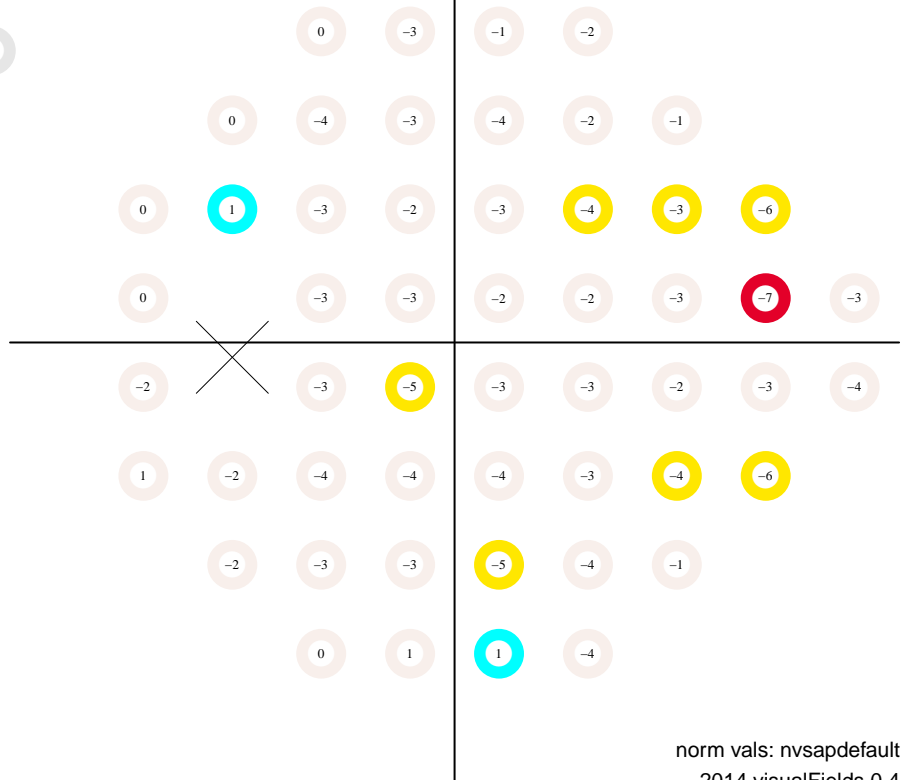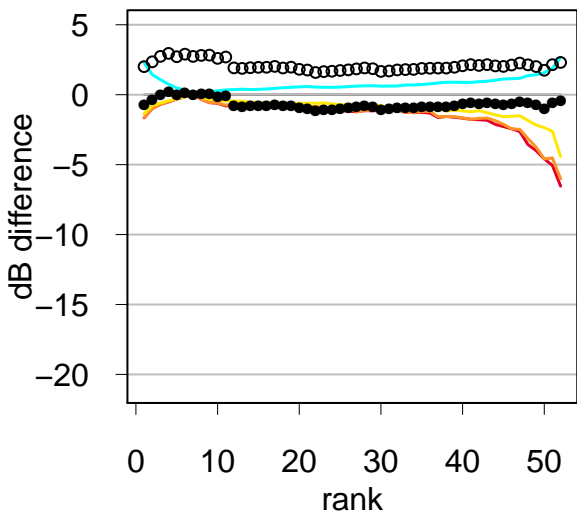

# Static Automated Perimetry. Single field analysis

Subject ID: 1021, age: 72, eye: OS (left)

Date: 03/21/2008 at 7:44:

Duration: 04:19, pause: 00:00

false positives 5.0 %

false negatives 0.0 %

fixation losses 15.4 %

MS 30.9 dB

MD 1.3 dB (p < 95 %)

PSD 1.3 dB (p < 95 %)

VFI 99.9 % (p < 95 %)

GH 2.9 dB

total deviation

Central 24-2  
SITA standard

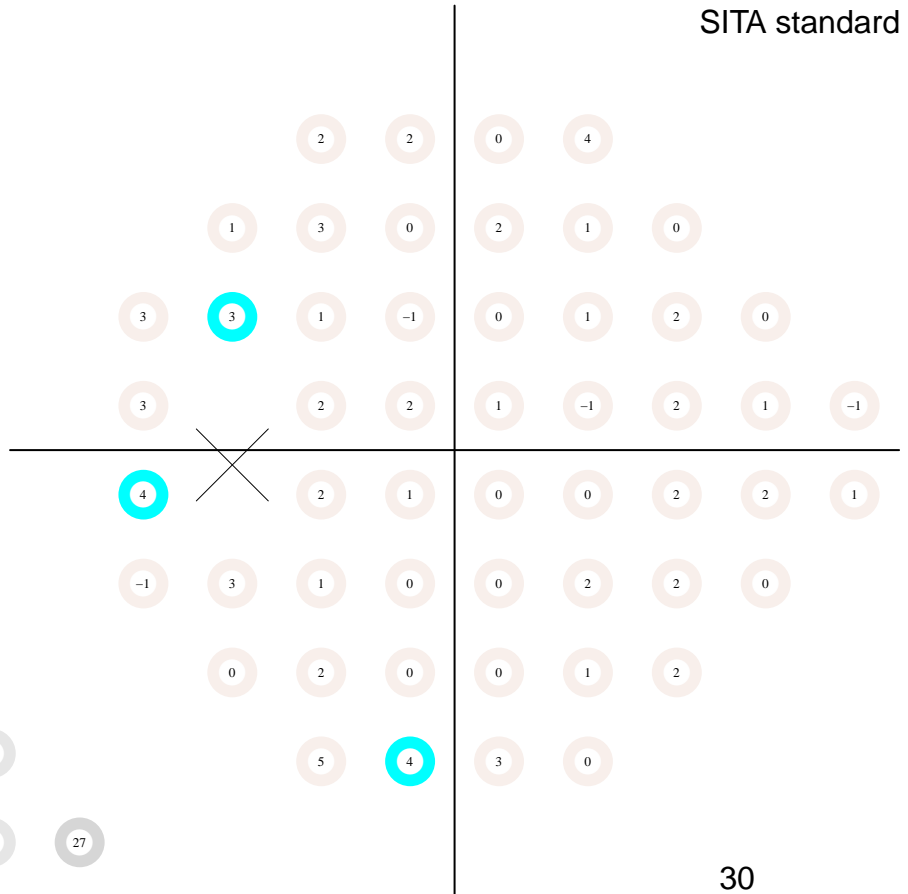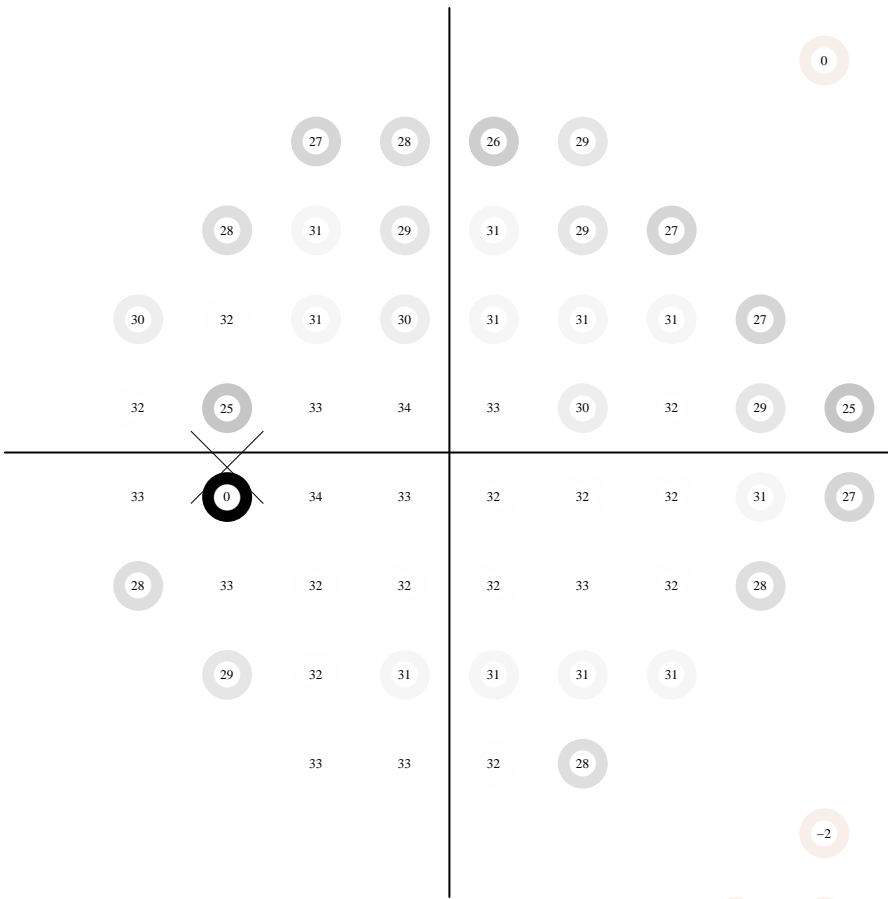

pattern deviation

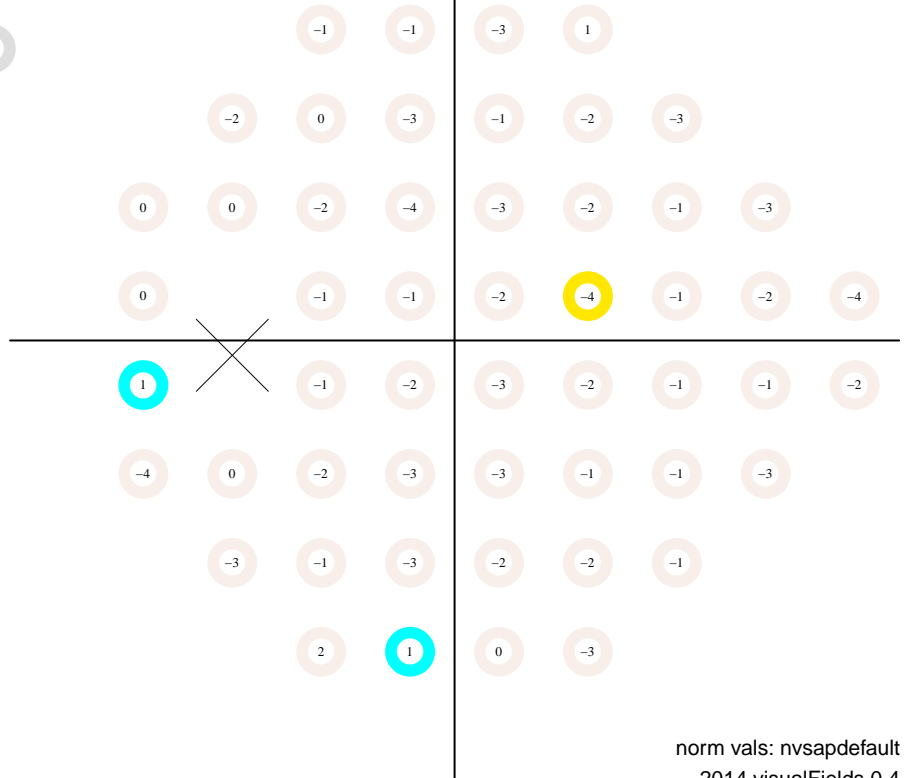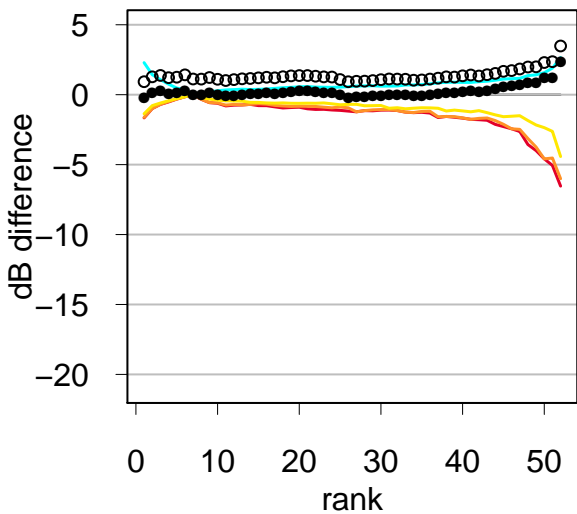

# Static Automated Perimetry. Single field analysis

Subject ID: 1021, age: 72, eye: OS (left)

Date: 04/11/2008 at 13:44

Duration: 04:04, pause: 00:00

false positives 0.0 %

false negatives 0.0 %

fixation losses 0.0 %

MS 31.4 dB

MD 1.7 dB (p < 100 %)

PSD 1.4 dB (p < 100 %)

VFI 100.0 % (p < 95 %)

GH 3.0 dB

total deviation

Central 24-2  
SITA standard

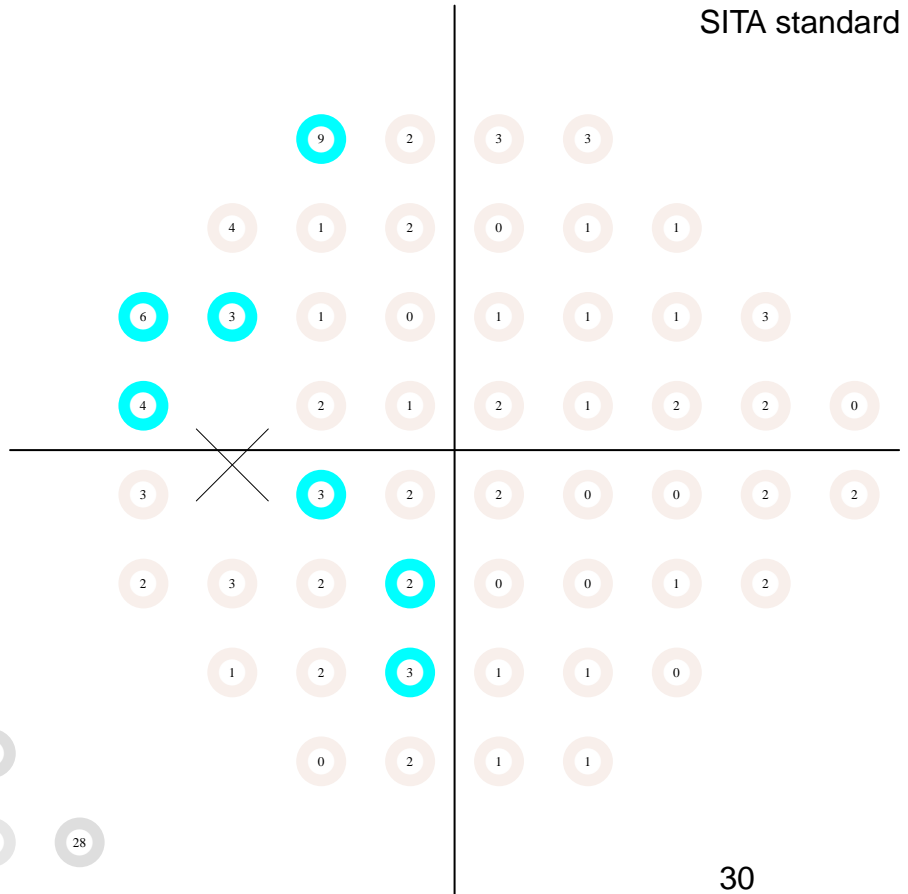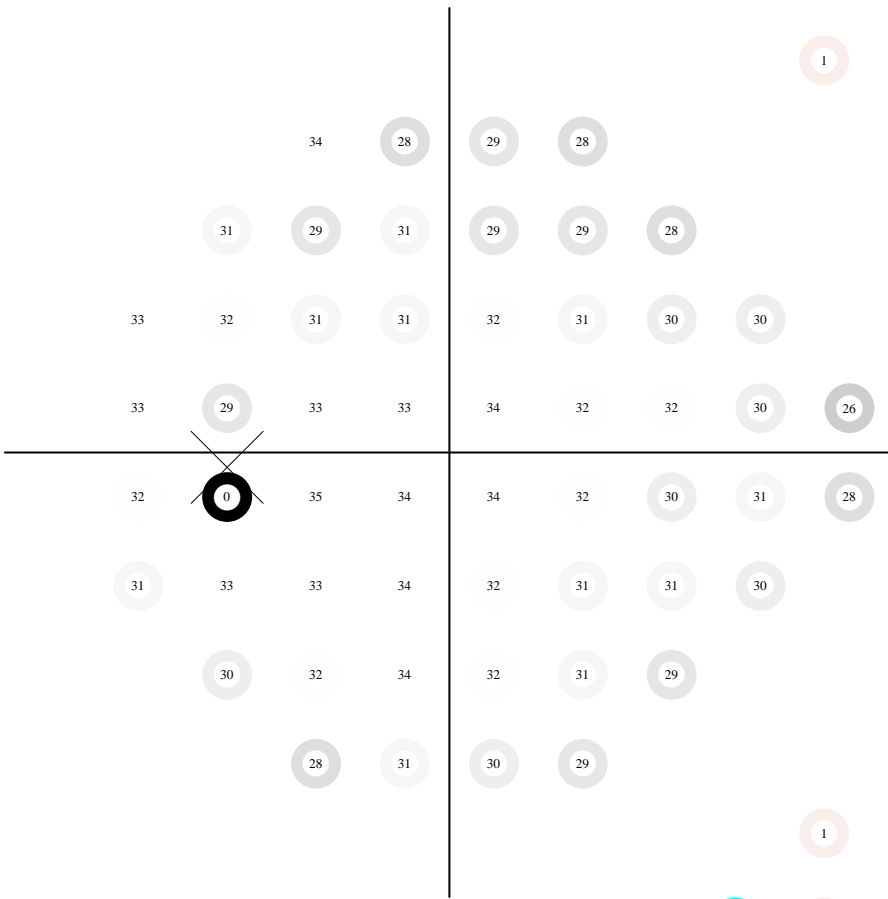

pattern deviation

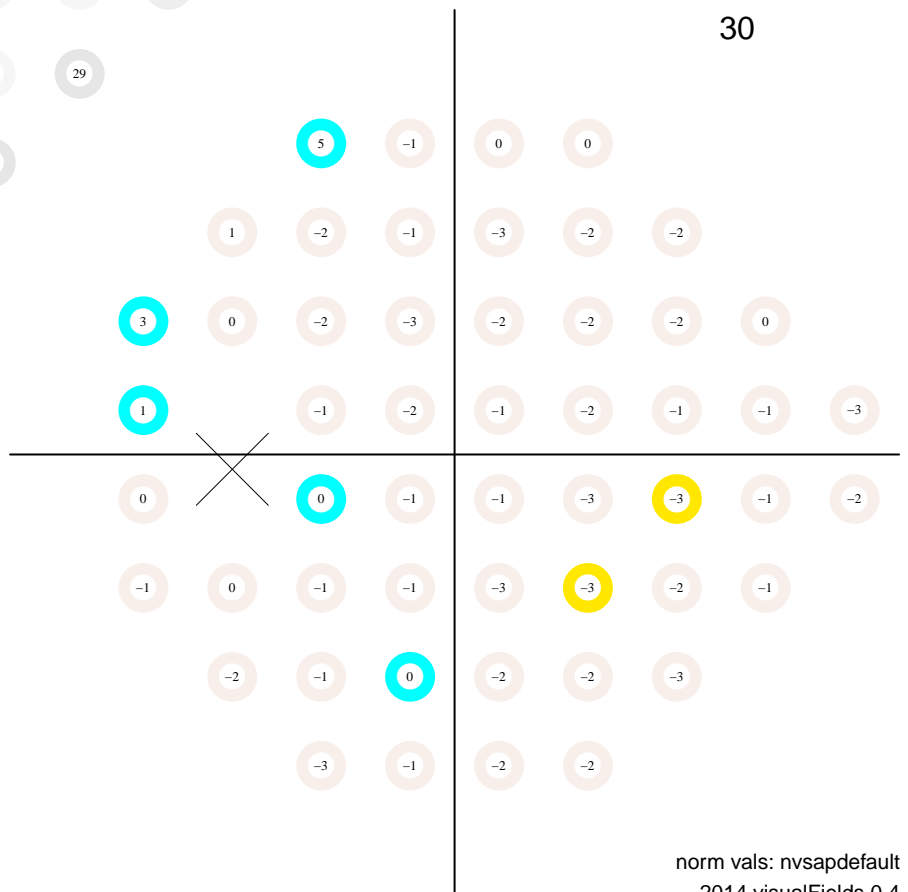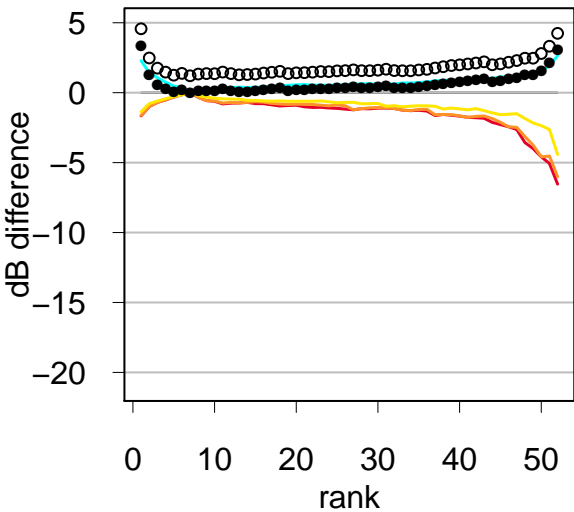

# Static Automated Perimetry. Single field analysis

Subject ID: 1021, age: 73, eye: OS (left)

Date: 10/21/2008 at 9:17:

Duration: 04:30, pause: 00:00

false positives 6.0 %

false negatives 0.0 %

fixation losses 0.0 %

MS 31.5 dB

MD 1.9 dB (p < 100 %)

PSD 1.2 dB (p < 100 %)

VFI 100.0 % (p < 95 %)

GH 3.1 dB

total deviation

Central 24-2  
SITA standard

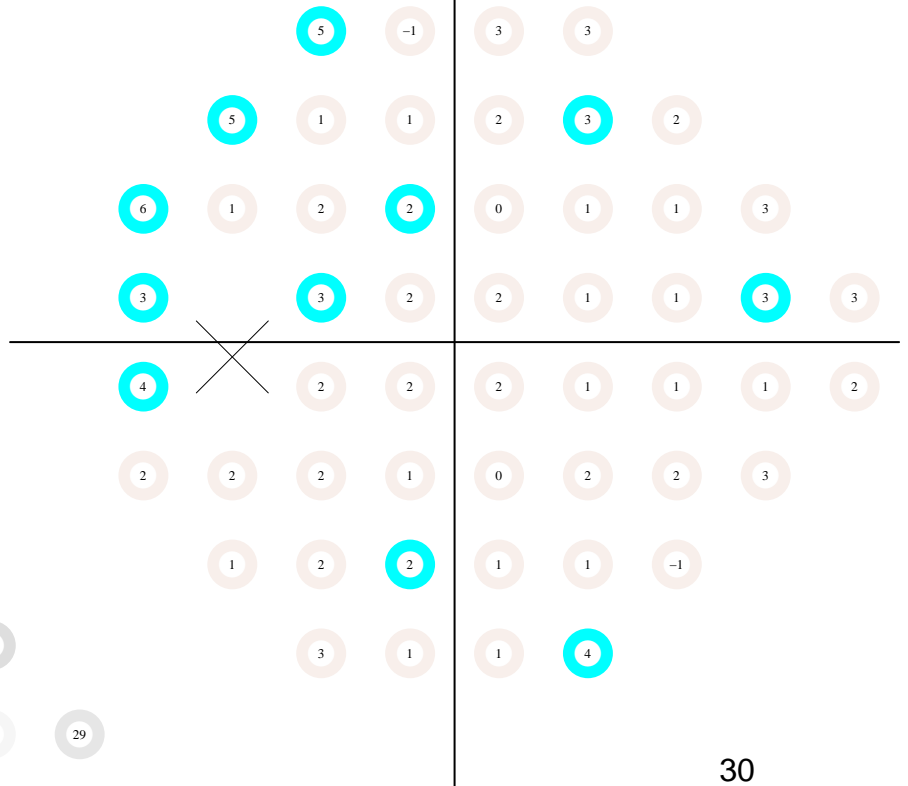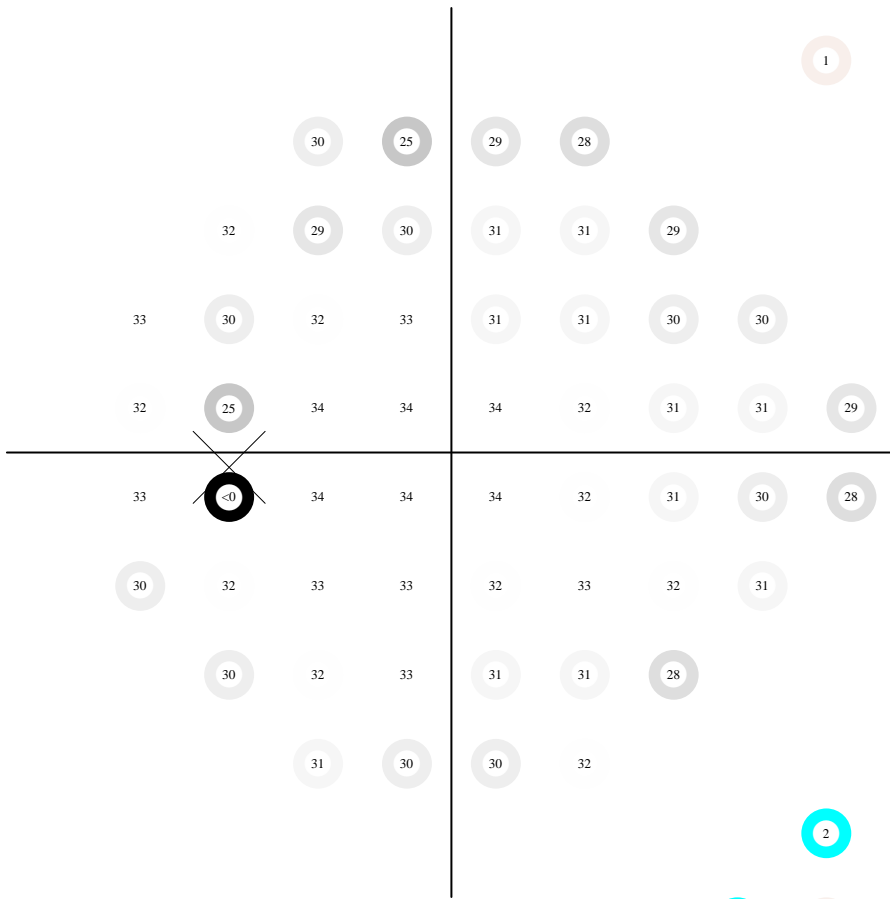

pattern deviation

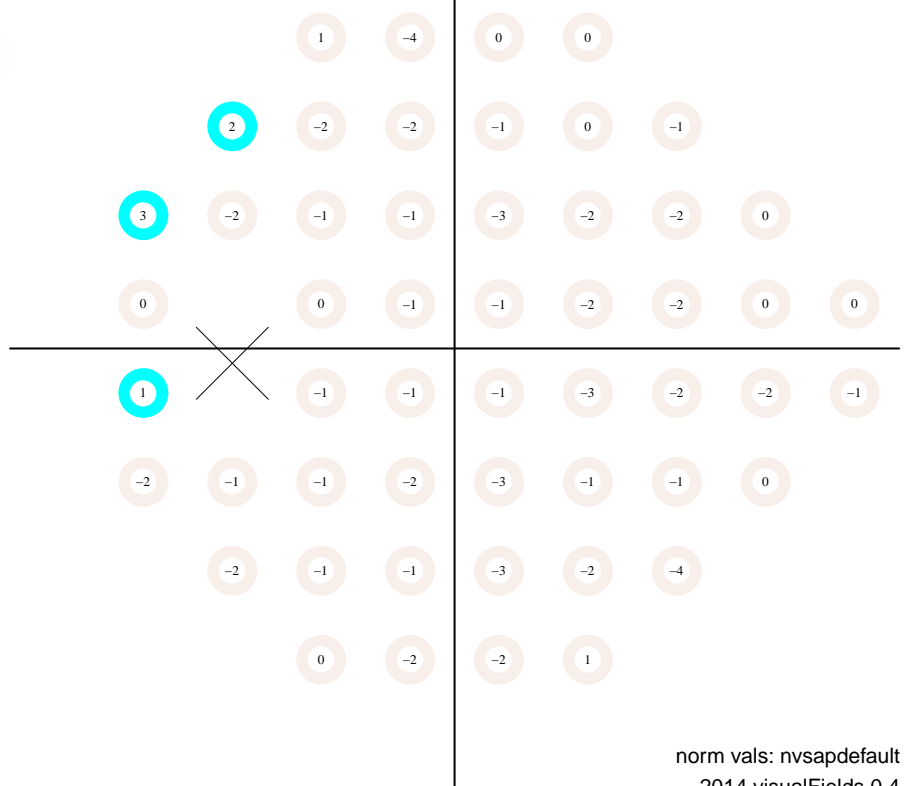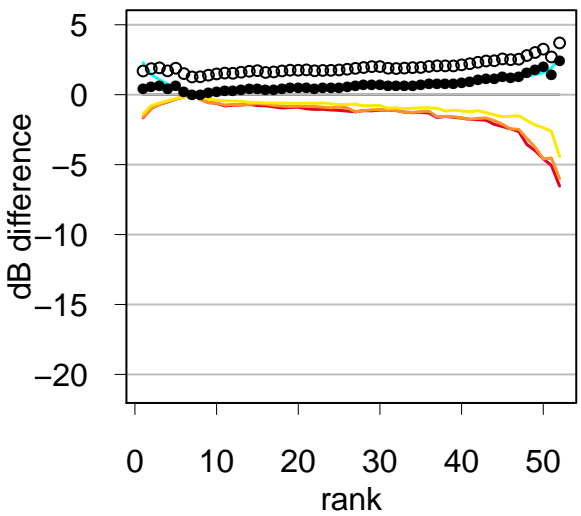

# Static Automated Perimetry. Single field analysis

Subject ID: 1021, age: 73, eye: OS (left)

Date: 03/25/2009 at 8:18:

Duration: 04:54, pause: 00:00

false positives 0.0 %

false negatives 0.0 %

fixation losses 0.0 %

MS 27.9 dB

MD -1.7 dB (p < 95 %)

PSD 1.8 dB (p < 95 %)

VFI 95.7 % (p < 0.5 %)

GH 0.9 dB

total deviation

Central 24-2  
SITA standard

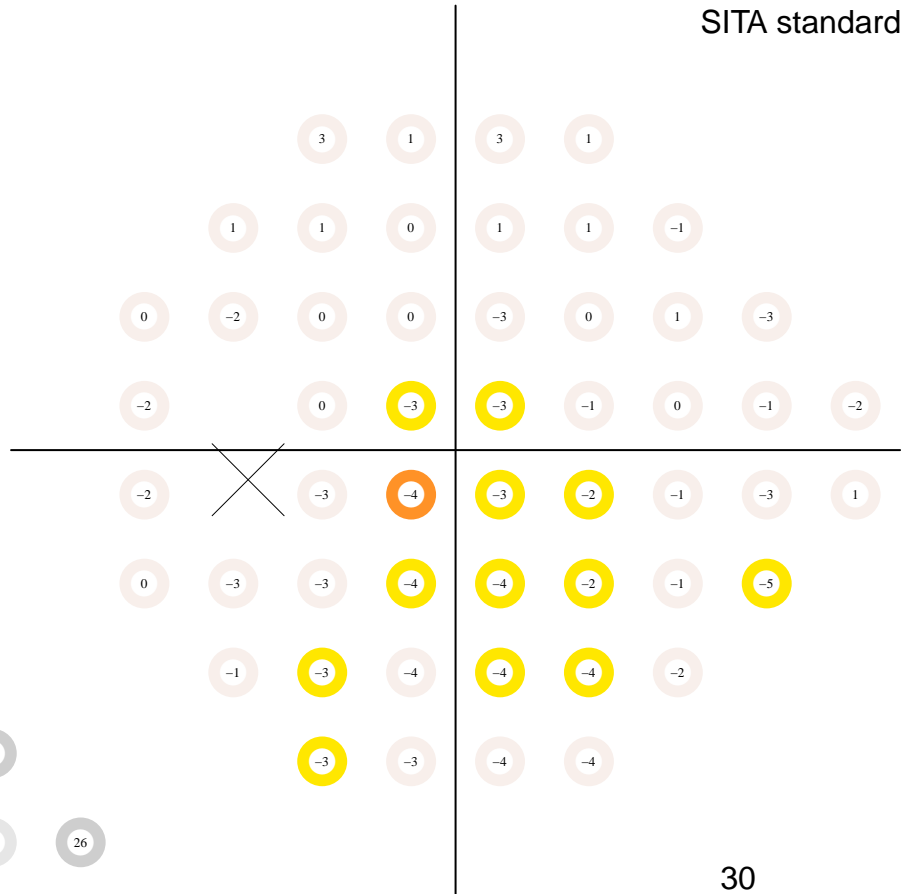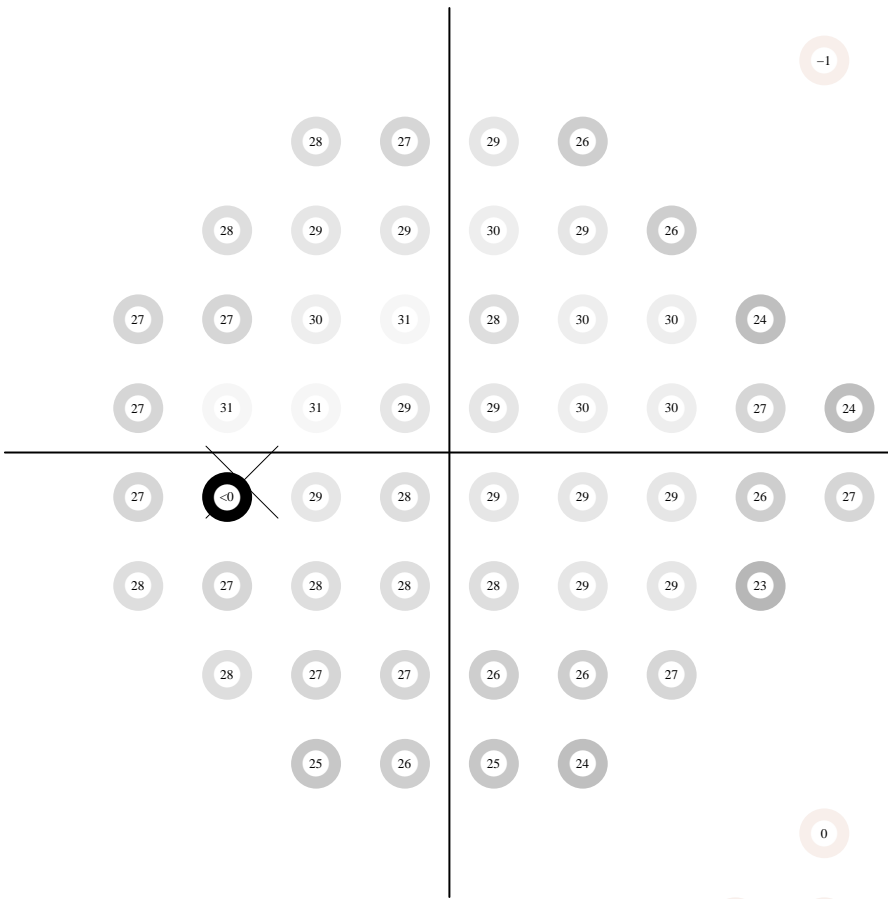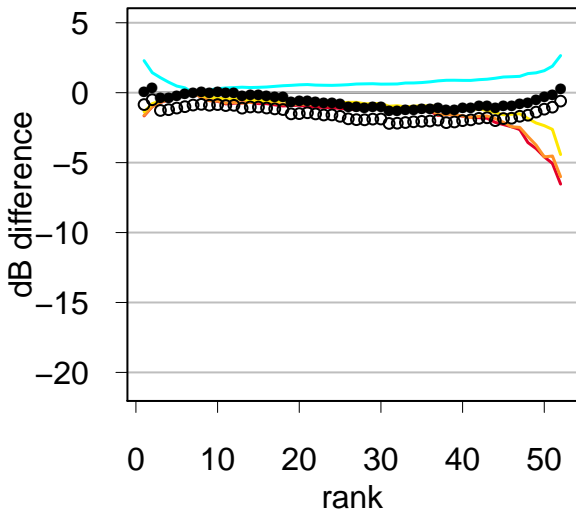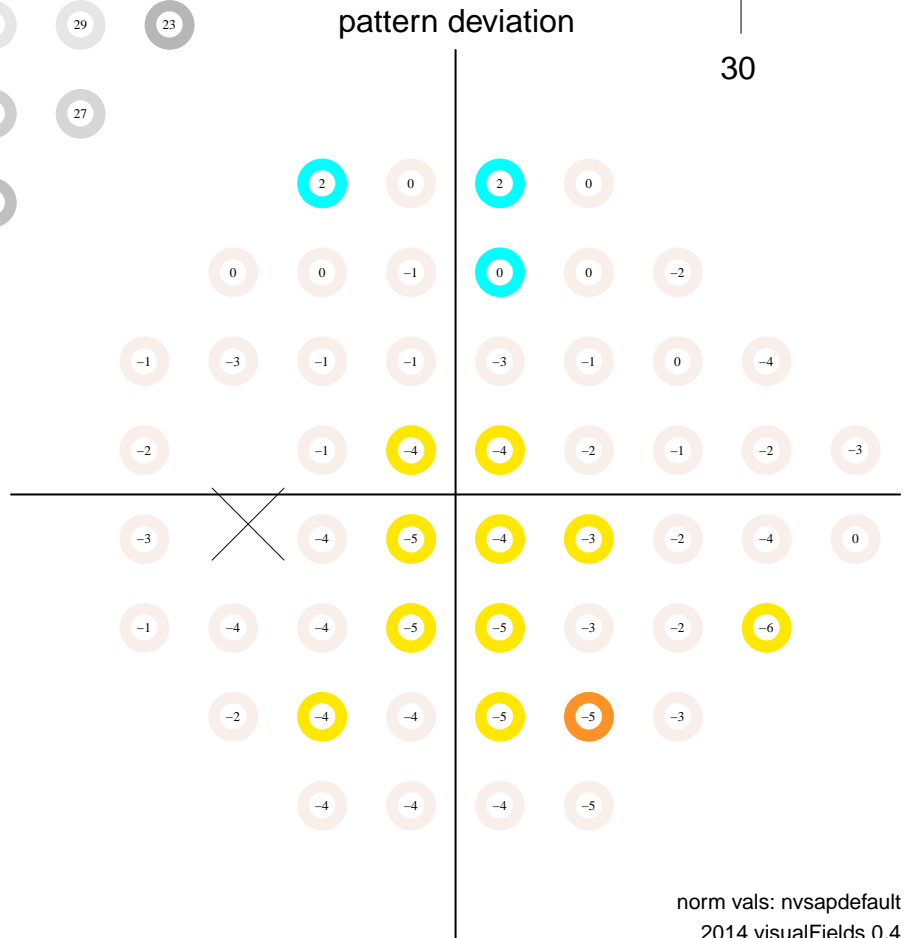

# Static Automated Perimetry. Single field analysis

Subject ID: 1021, age: 73, eye: OS (left)

Date: 05/07/2009 at 8:15:

Duration: 04:30, pause: 00:00

false positives 6.0 %

false negatives 1.0 %

fixation losses 0.0 %

MS 30.3 dB

MD 0.8 dB (p < 95 %)

PSD 1.7 dB (p < 95 %)

VFI 99.4 % (p < 95 %)

GH 2.7 dB

total deviation

Central 24-2  
SITA standard

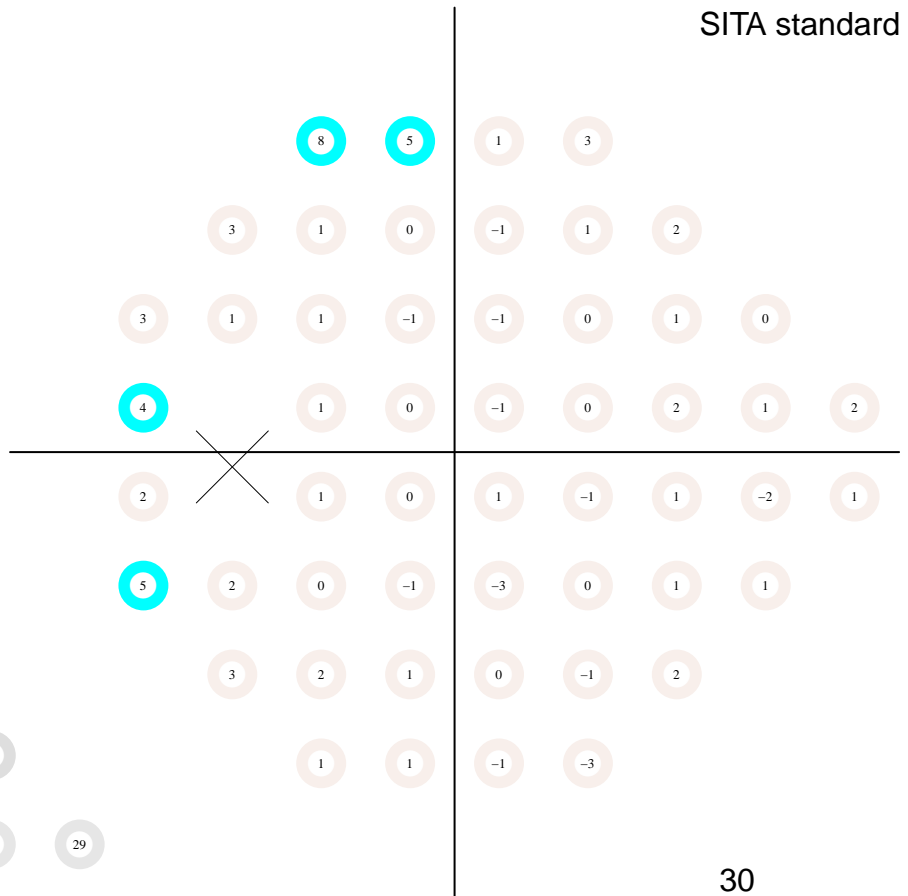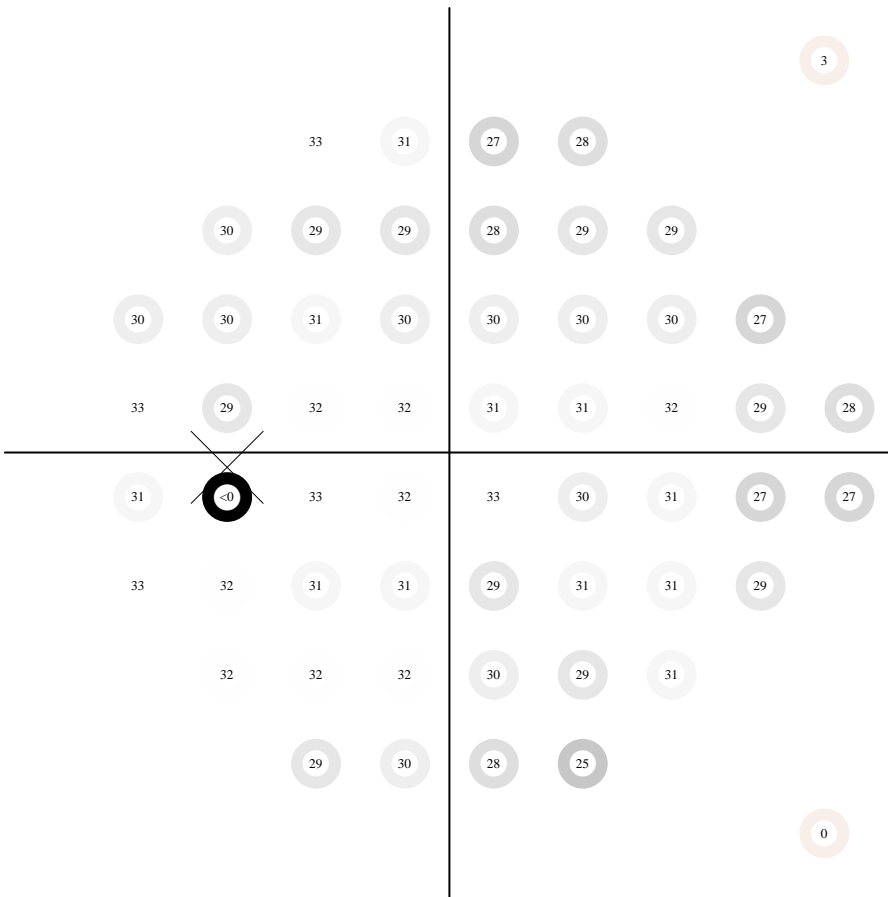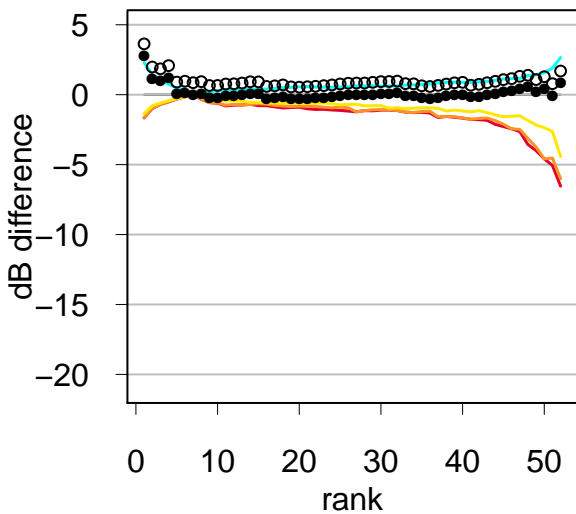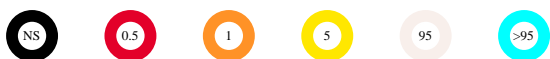

pattern deviation

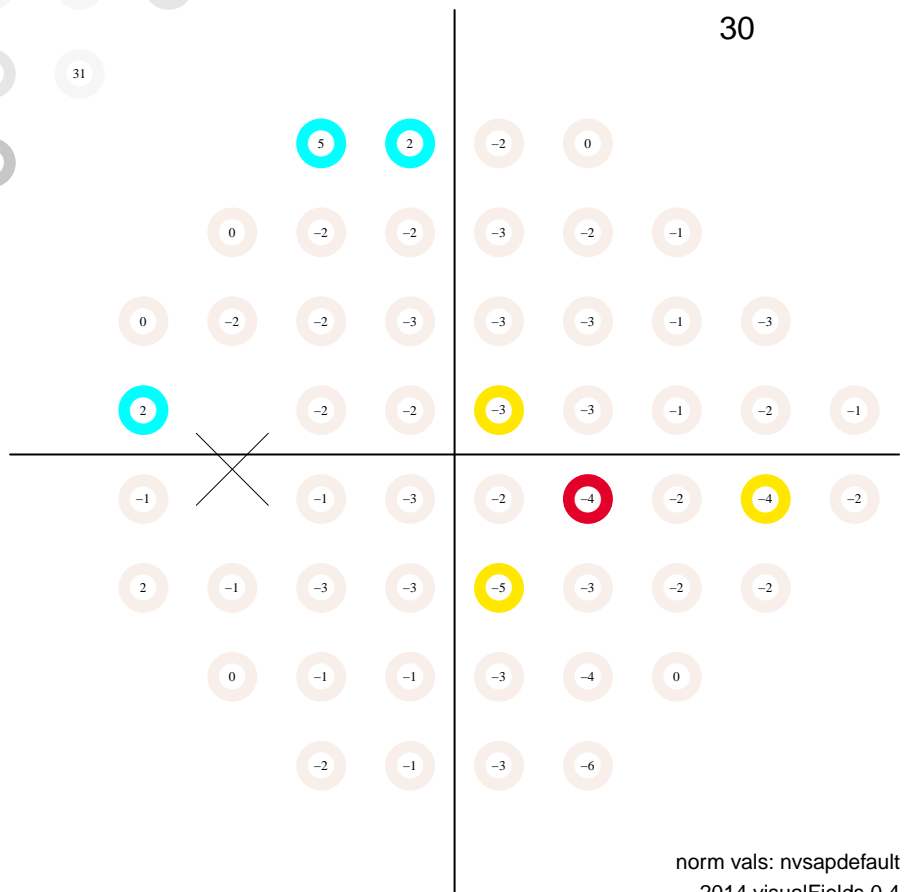



# Static Automated Perimetry. Single field analysis

Subject ID: 1021, age: 74, eye: OS (left)

Date: 09/01/2009 at 15:03

Duration: 04:31, pause: 00:00

false positives 3.0 %

false negatives 0.0 %

fixation losses 0.0 %

MS 30.2 dB

MD 0.7 dB (p < 95 %)

PSD 2.0 dB (p < 95 %)

VFI 99.1 % (p < 95 %)

GH 3.0 dB

total deviation

Central 24-2  
SITA standard

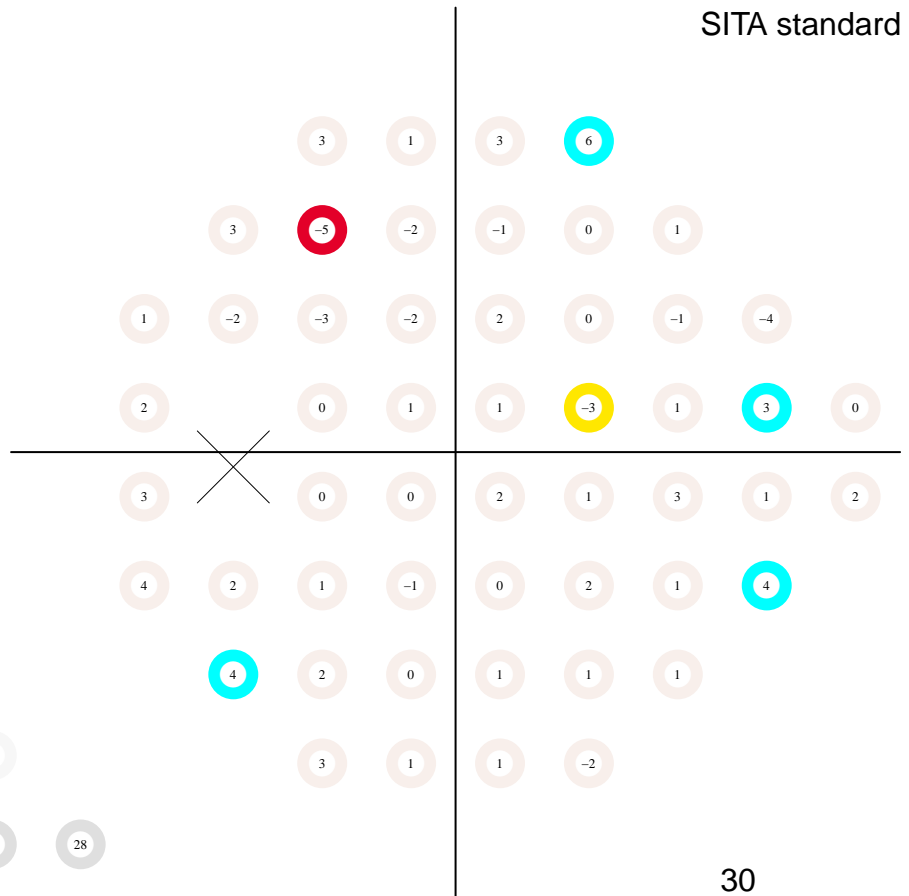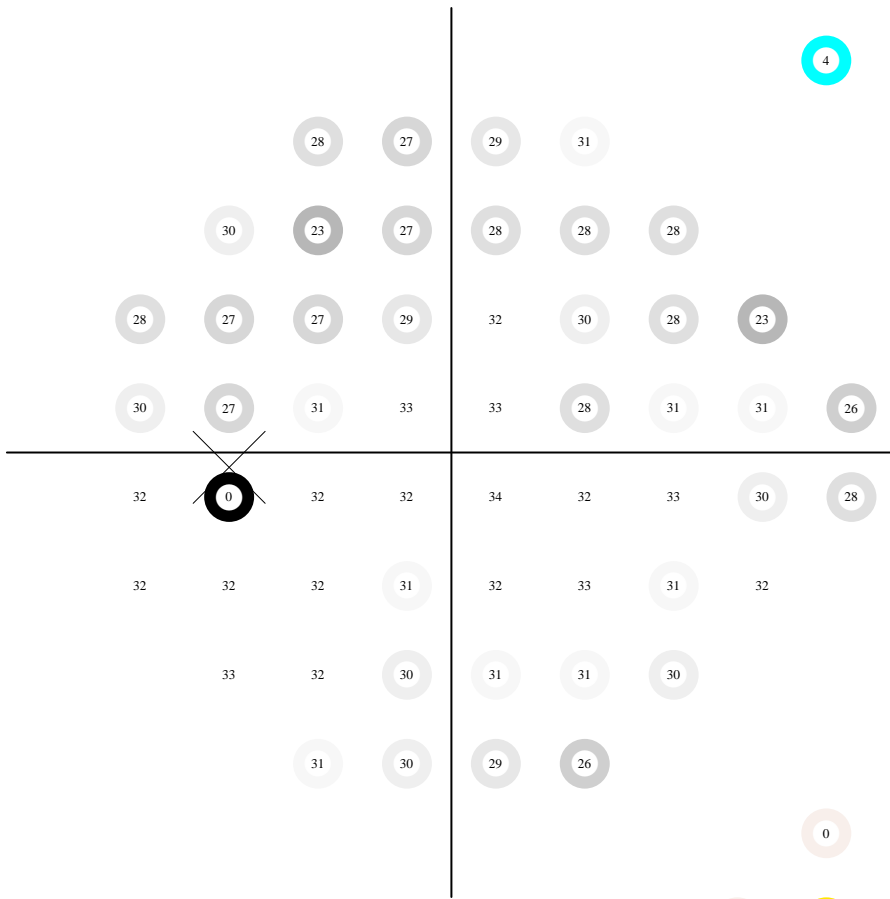

pattern deviation

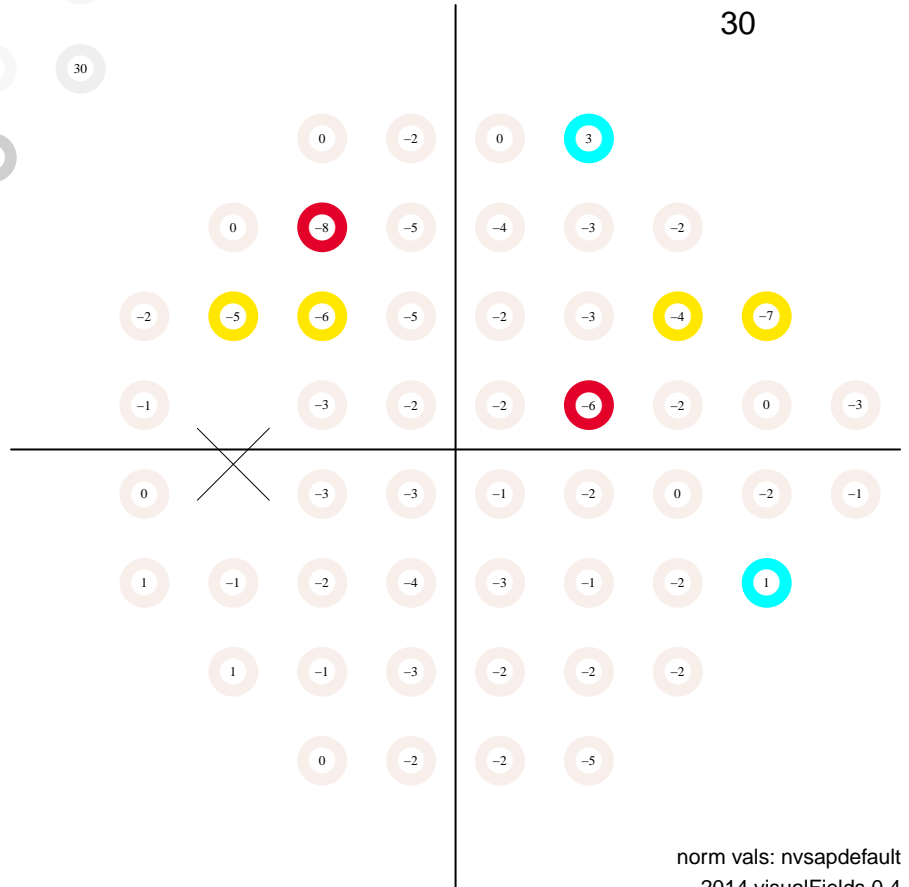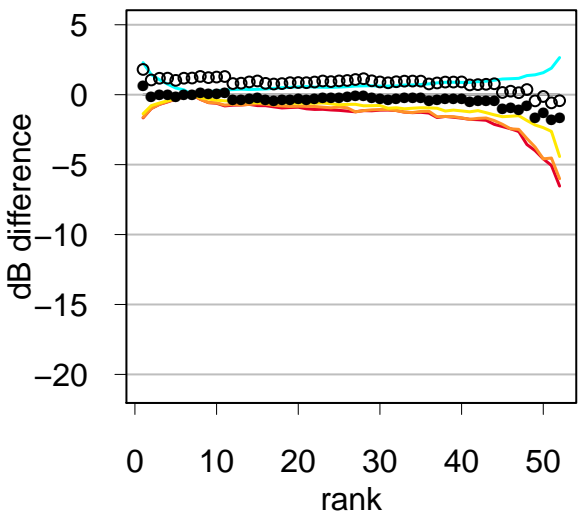

# Static Automated Perimetry. Single field analysis

Subject ID: 1021, age: 74, eye: OS (left)

Date: 11/10/2009 at 10:17

Duration: 04:45, pause: 00:00

false positives 7.0 %

false negatives 7.0 %

fixation losses 20.0 %

MS 30.9 dB

MD 1.4 dB (p < 95 %)

PSD 1.7 dB (p < 95 %)

VFI 99.8 % (p < 95 %)

GH 3.1 dB

total deviation

Central 24-2  
SITA standard

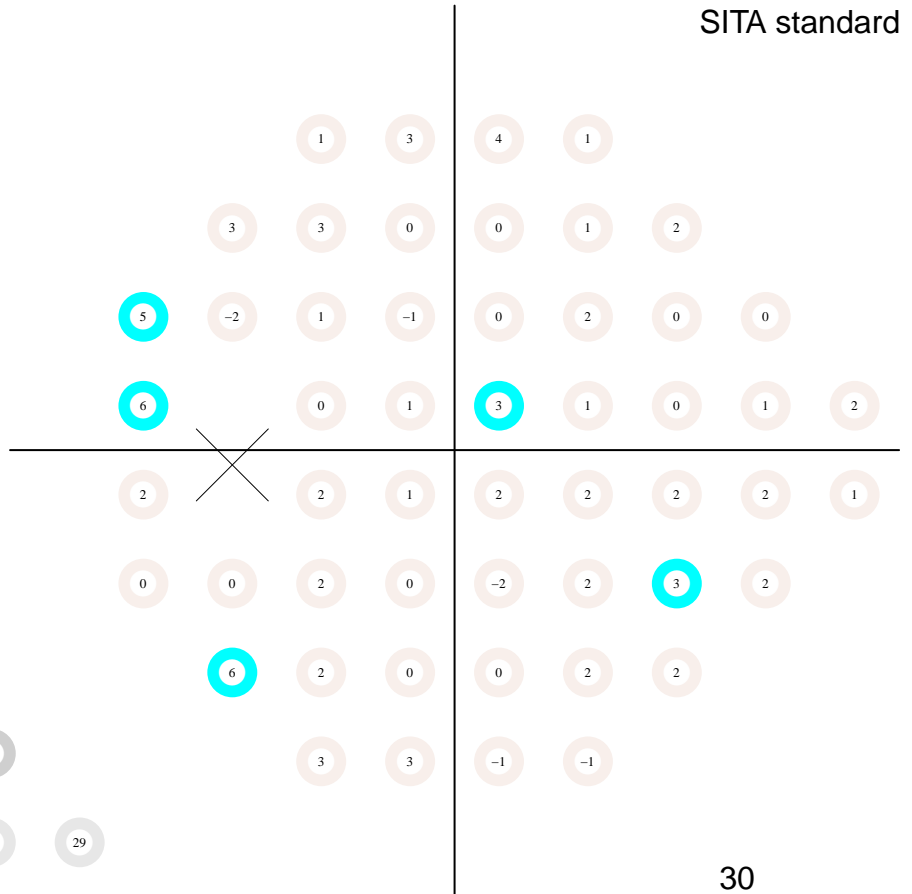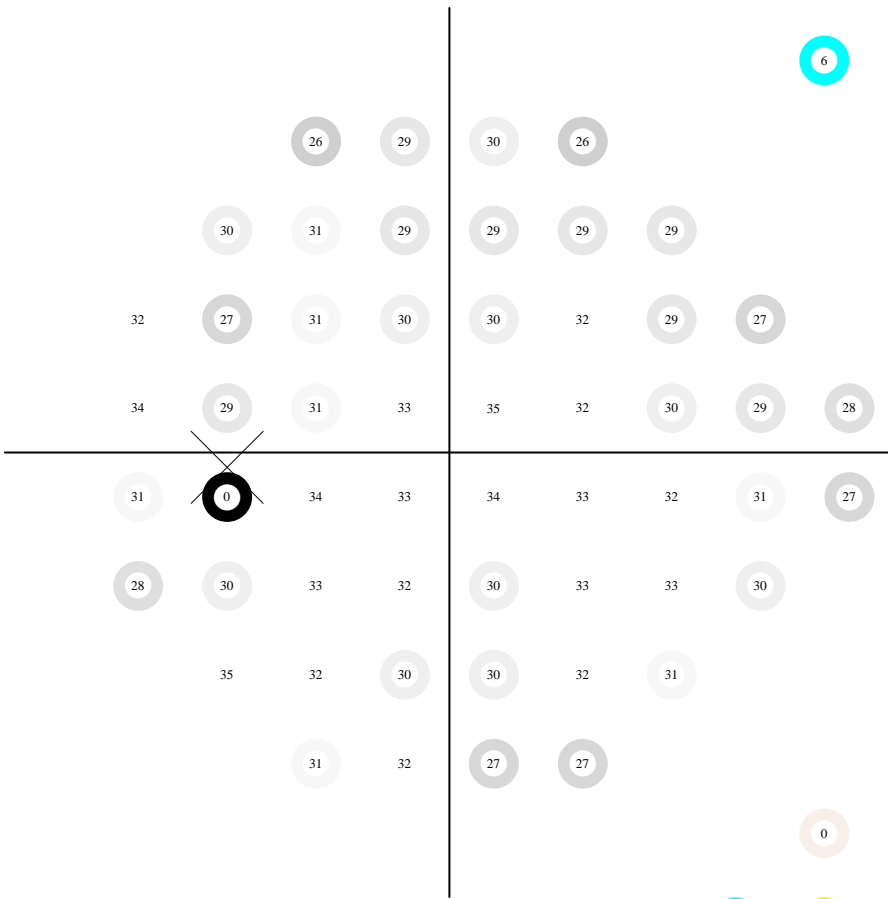

pattern deviation

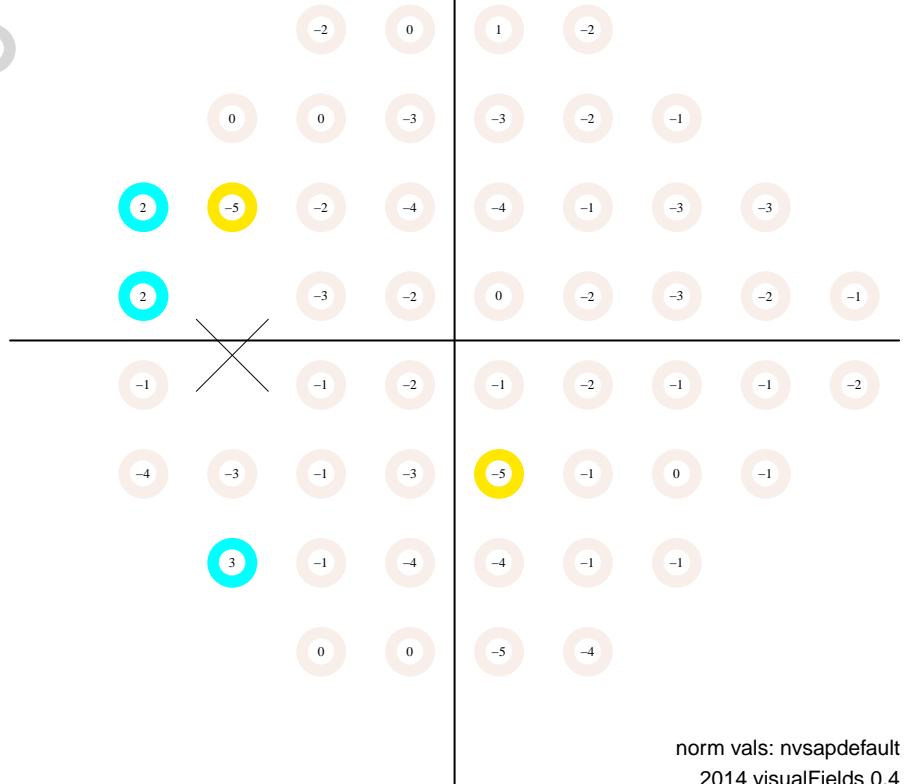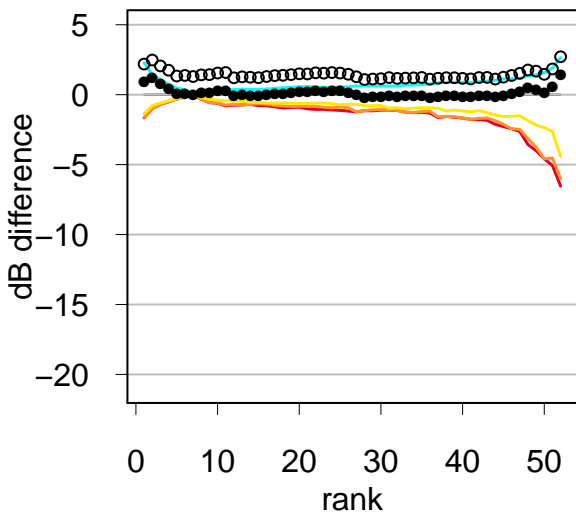

# Static Automated Perimetry. Single field analysis

Subject ID: 1021, age: 74, eye: OS (left)

Date: 03/24/2010 at 7:50:

Duration: 04:50, pause: 00:00

false positives 7.0 %

false negatives 3.0 %

fixation losses 6.7 %

MS 30.5 dB

MD 1.0 dB (p < 95 %)

PSD 1.9 dB (p < 95 %)

VFI 99.2 % (p < 95 %)

GH 3.1 dB

total deviation

Central 24-2  
SITA standard

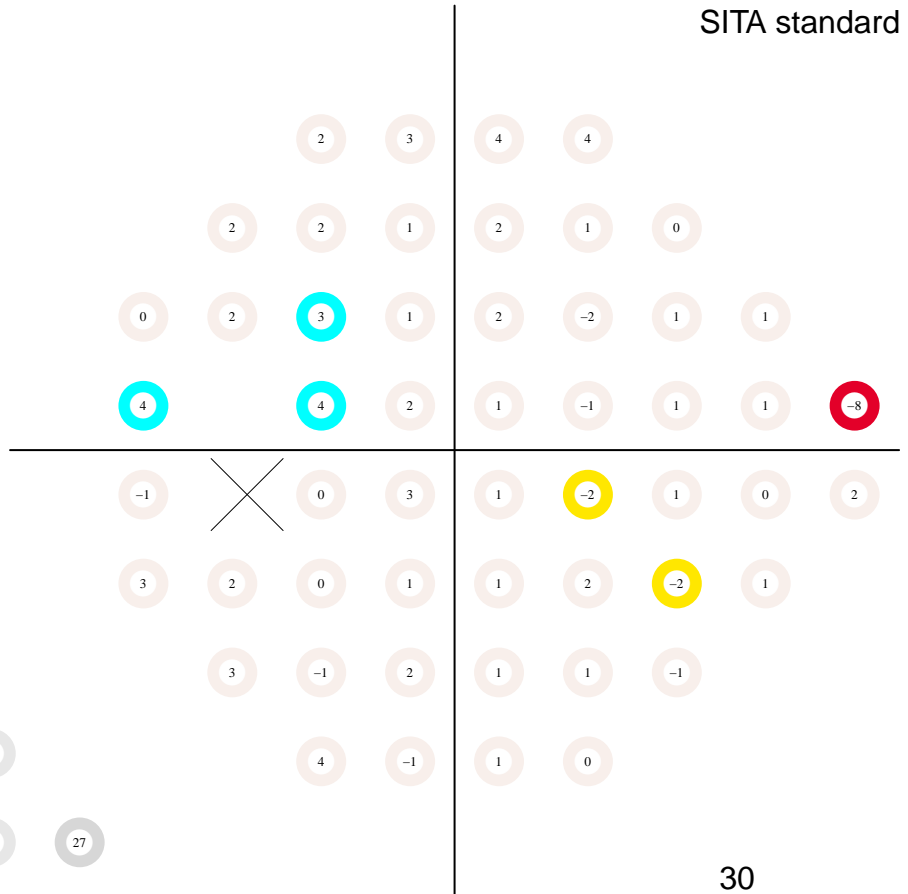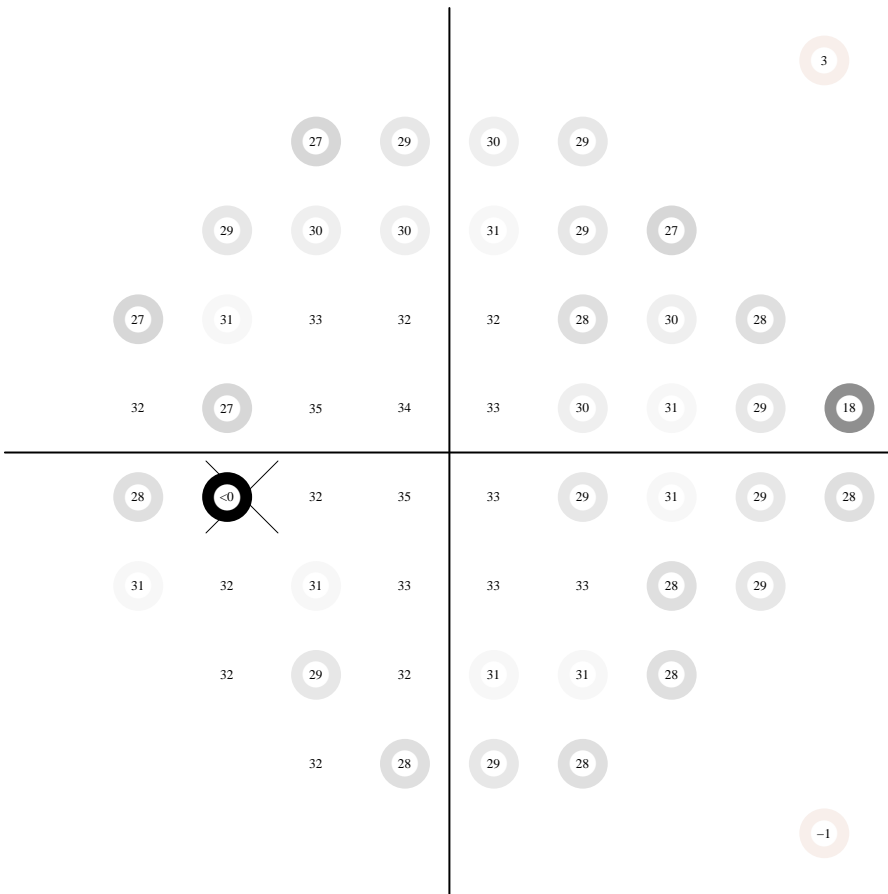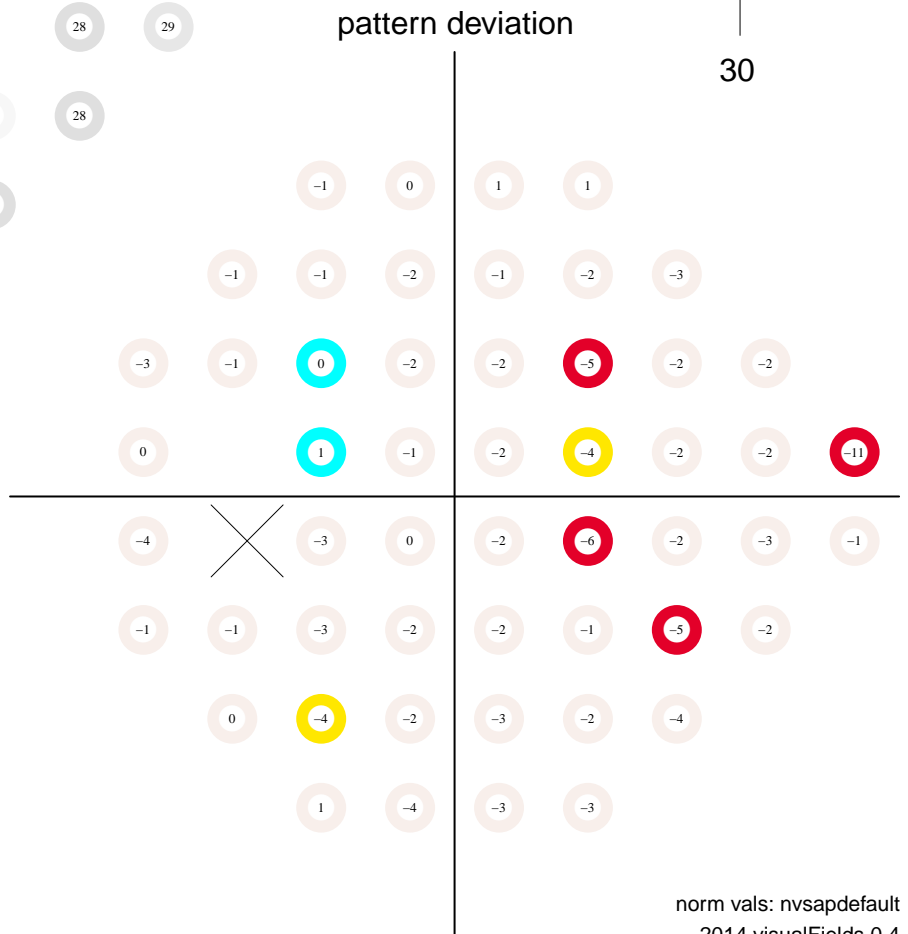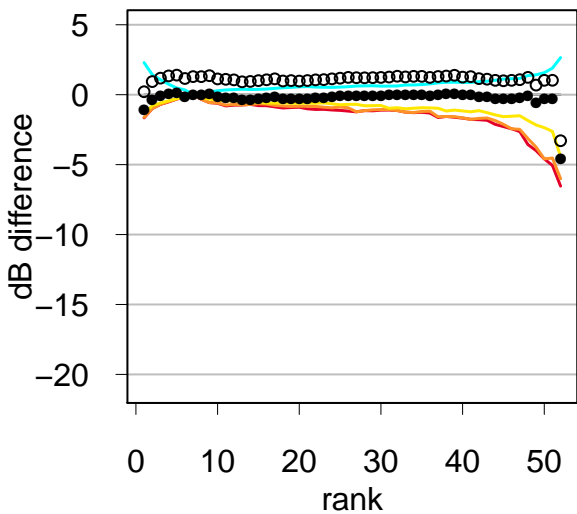

# Static Automated Perimetry. Single field analysis

Subject ID: 1021, age: 75, eye: OS (left)

Date: 06/10/2011 at 6:48:

Duration: 04:35, pause: 00:00

false positives 1.0 %

false negatives 0.0 %

fixation losses 0.0 %

MS 30.1 dB

MD 0.7 dB (p < 95 %)

PSD 1.7 dB (p < 95 %)

VFI 99.0 % (p < 95 %)

GH 3.1 dB

total deviation

Central 24-2  
SITA standard

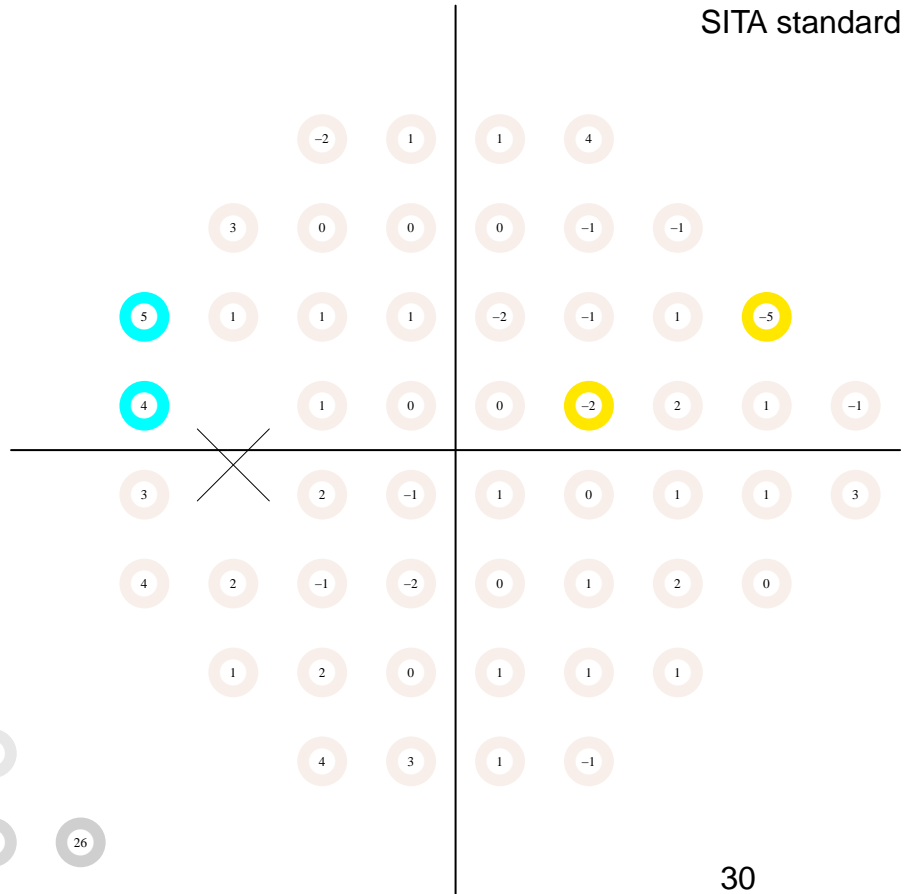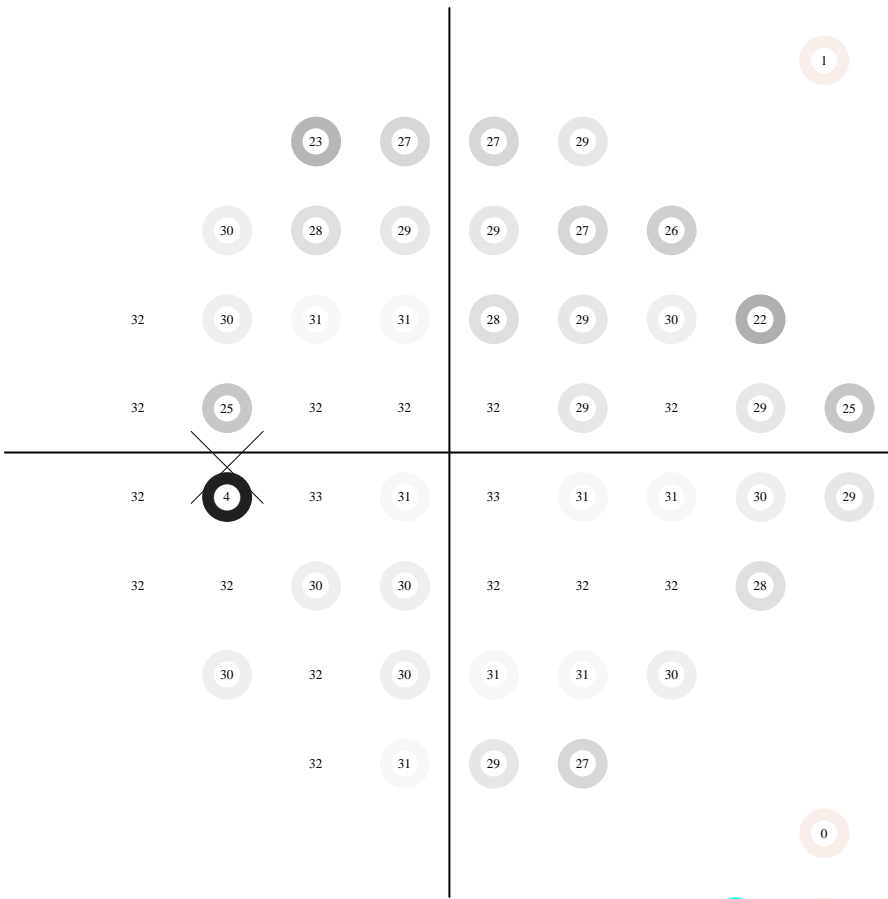

pattern deviation

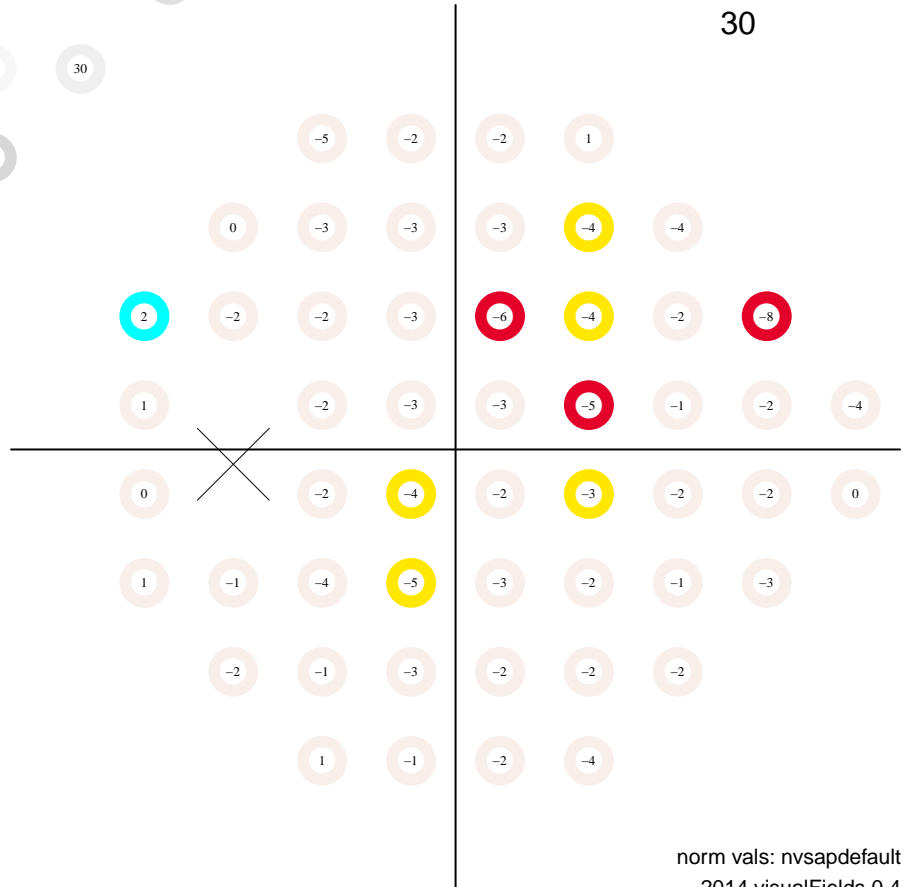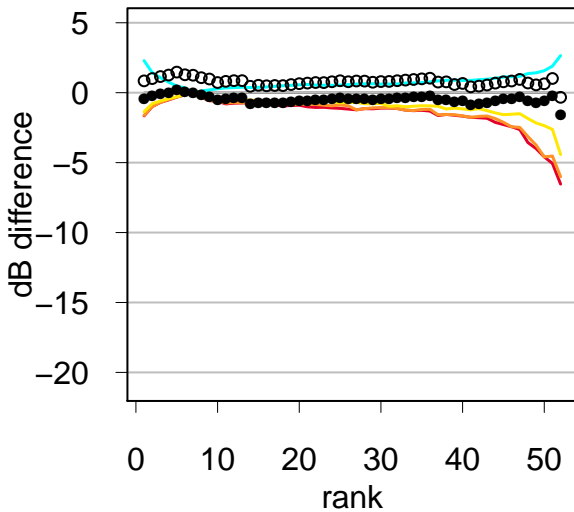

# Static Automated Perimetry. Single field analysis

Subject ID: 1021, age: 76, eye: OS (left)

Date: 08/09/2011 at 13:30

Duration: 04:47, pause: 00:00

false positives 4.0 %

false negatives 1.0 %

fixation losses 14.3 %

MS 30.6 dB

MD 1.2 dB (p < 95 %)

PSD 2.2 dB (p < 95 %)

VFI 98.8 % (p < 95 %)

GH 3.9 dB

total deviation

Central 24-2  
SITA standard

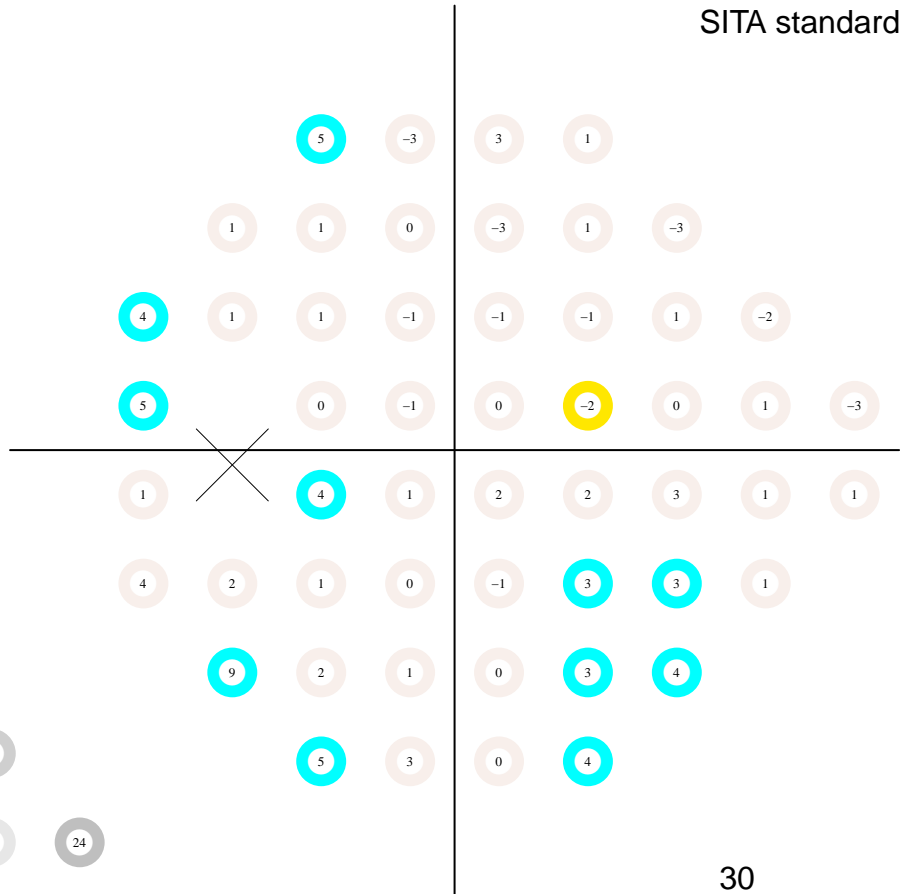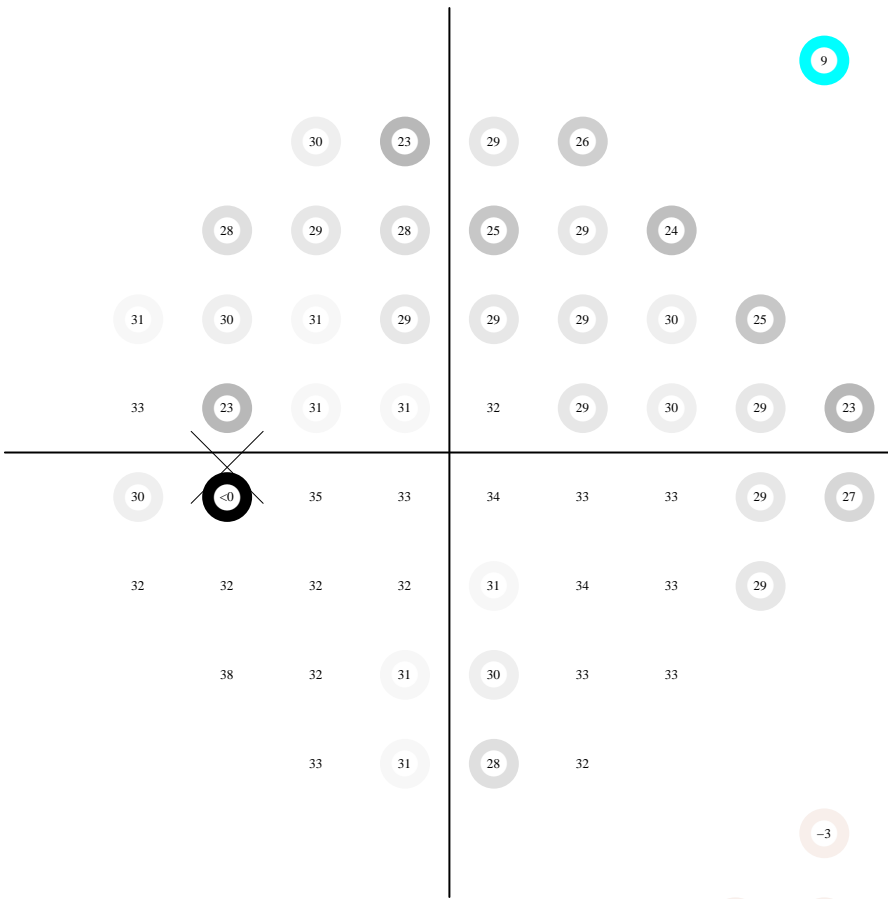

pattern deviation

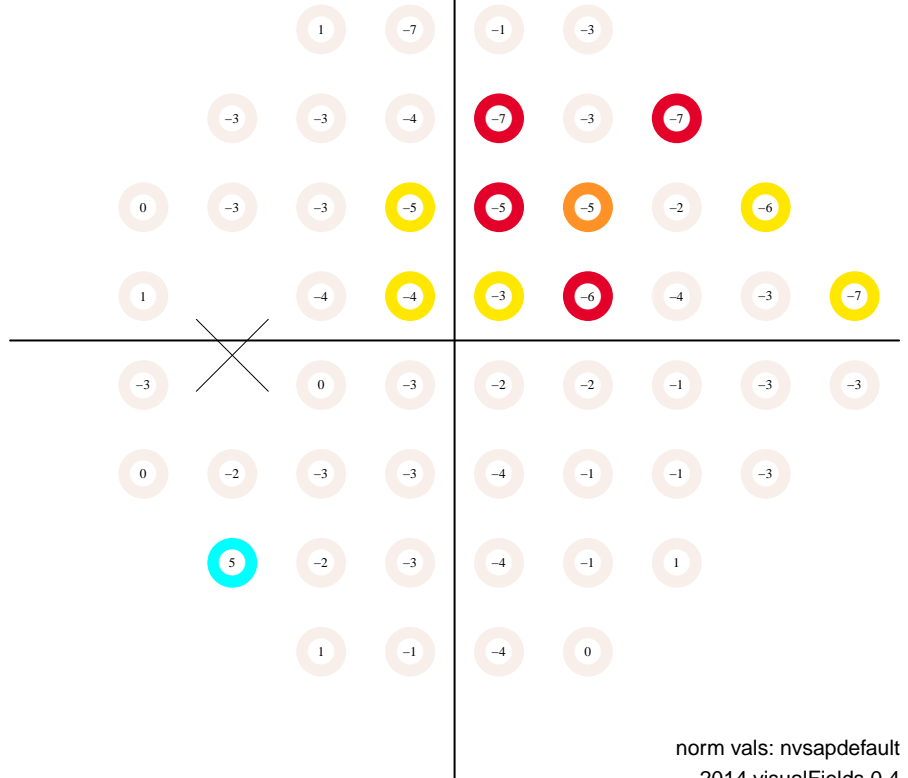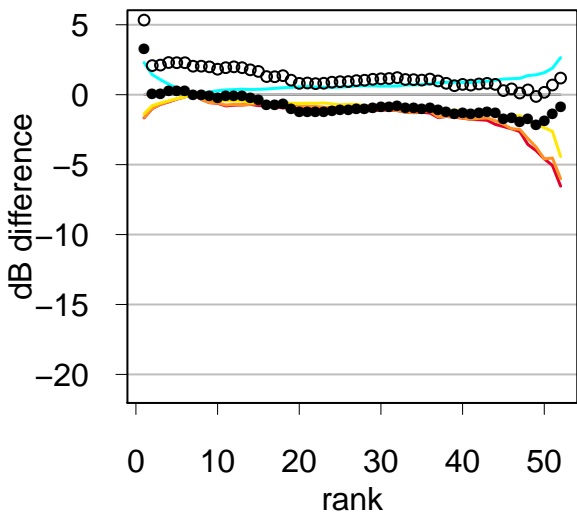

# Static Automated Perimetry. Single field analysis

Subject ID: 1021, age: 76, eye: OS (left)

Date: 11/15/2011 at 8:12:

Duration: 04:50, pause: 00:00

false positives 7.0 %

false negatives 12.0 %

fixation losses 15.4 %

MS 29.4 dB

MD 0.1 dB (p < 95 %)

PSD 2.1 dB (p < 95 %)

VFI 98.5 % (p < 95 %)

GH 2.2 dB

total deviation

Central 24-2  
SITA standard

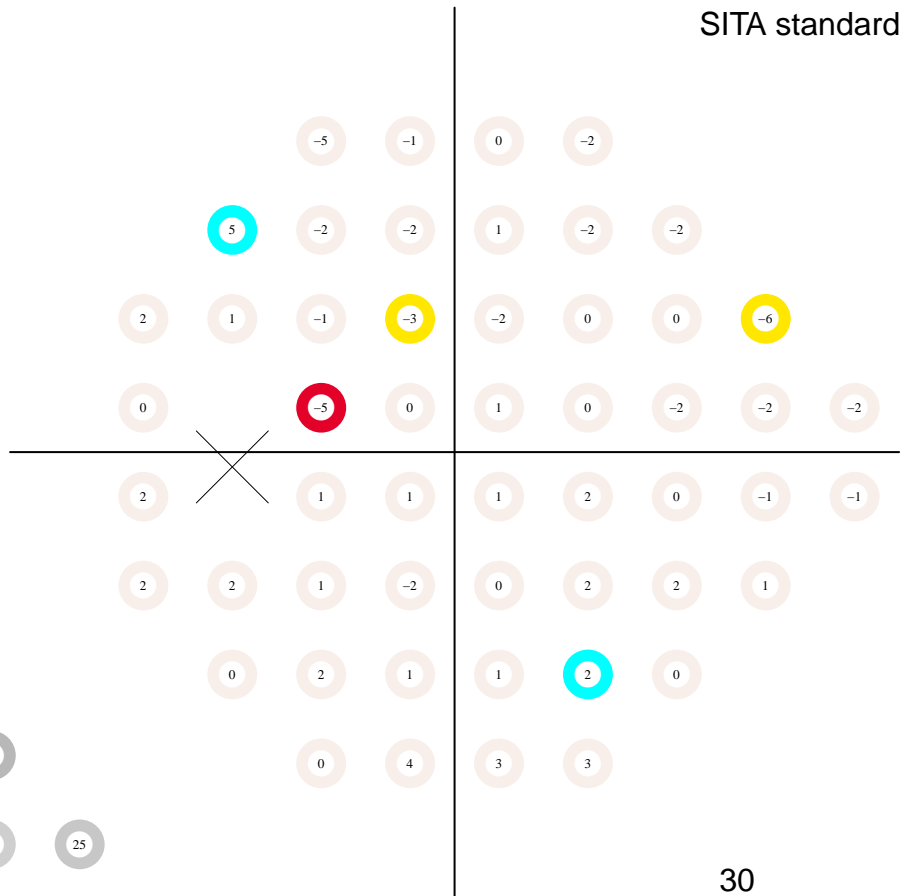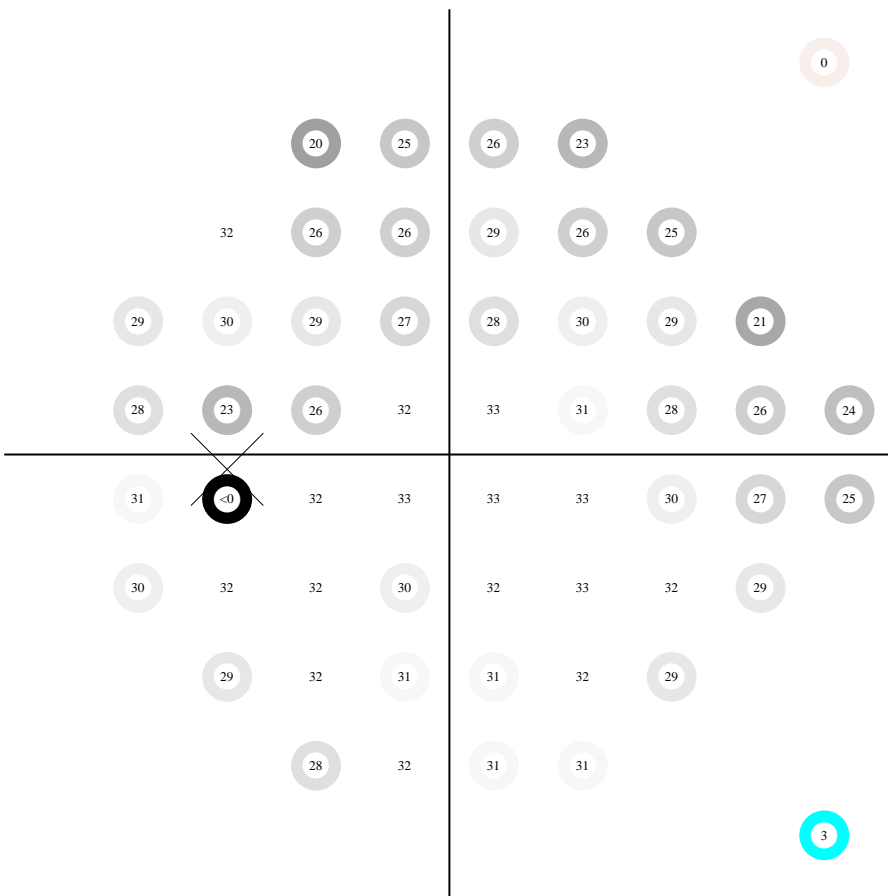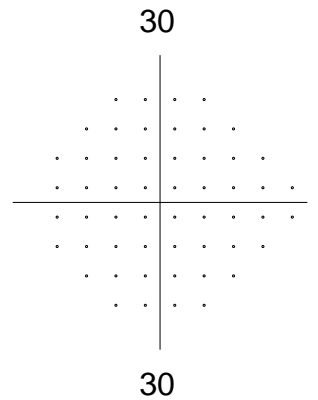

pattern deviation

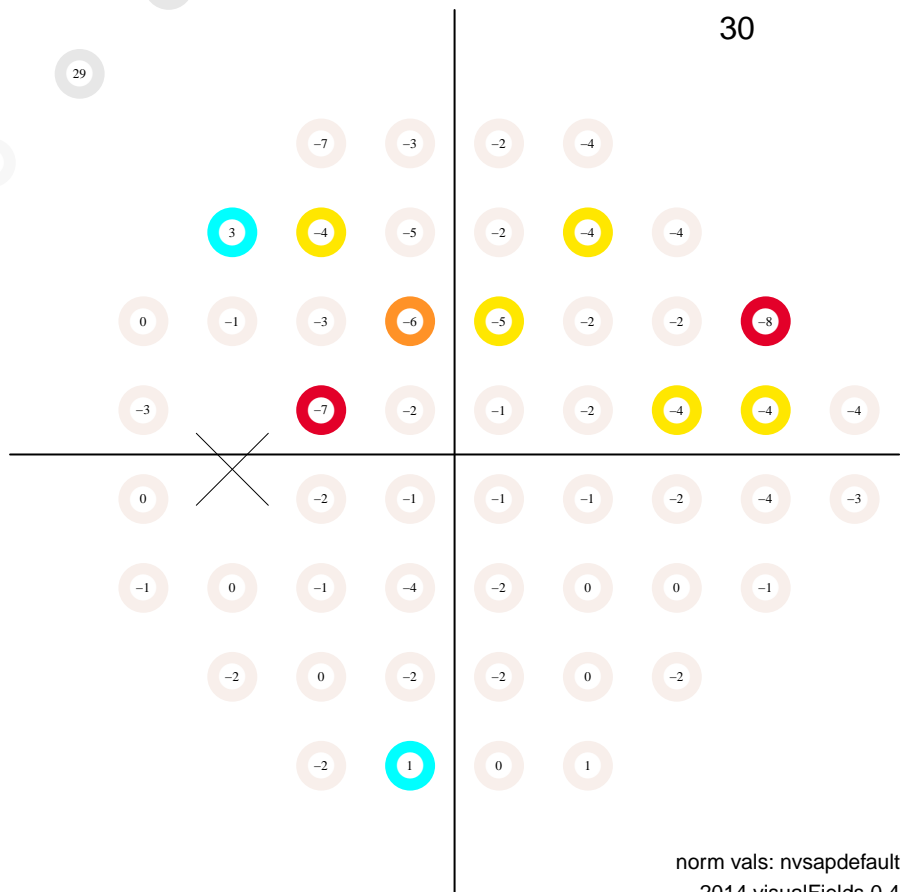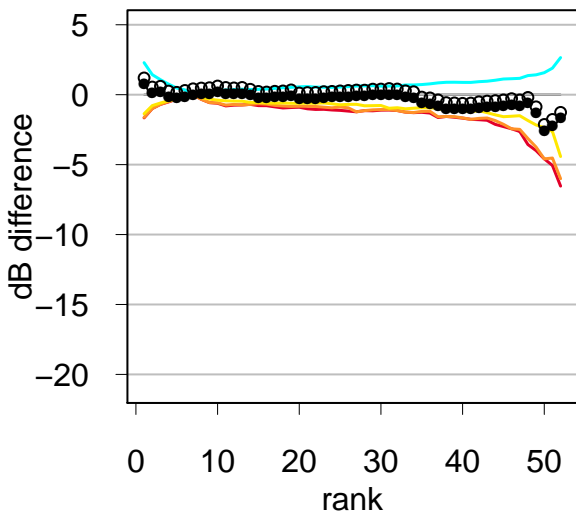

# Static Automated Perimetry. Single field analysis

Subject ID: 1021, age: 76, eye: OS (left)

Date: 07/16/2012 at 9:14:

Duration: 05:13, pause: 00:00

false positives 4.0 %

false negatives 7.0 %

fixation losses 6.7 %

MS 30.0 dB

MD 0.6 dB (p < 95 %)

PSD 2.1 dB (p < 95 %)

VFI 98.6 % (p < 95 %)

GH 3.1 dB

total deviation

Central 24-2  
SITA standard

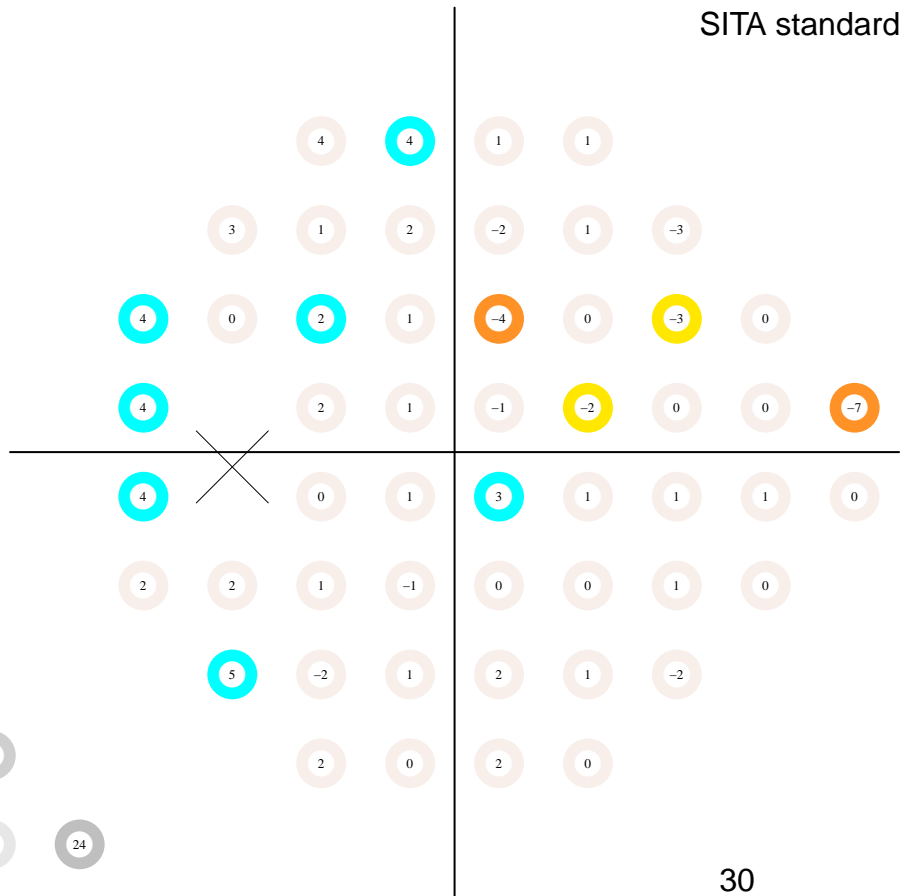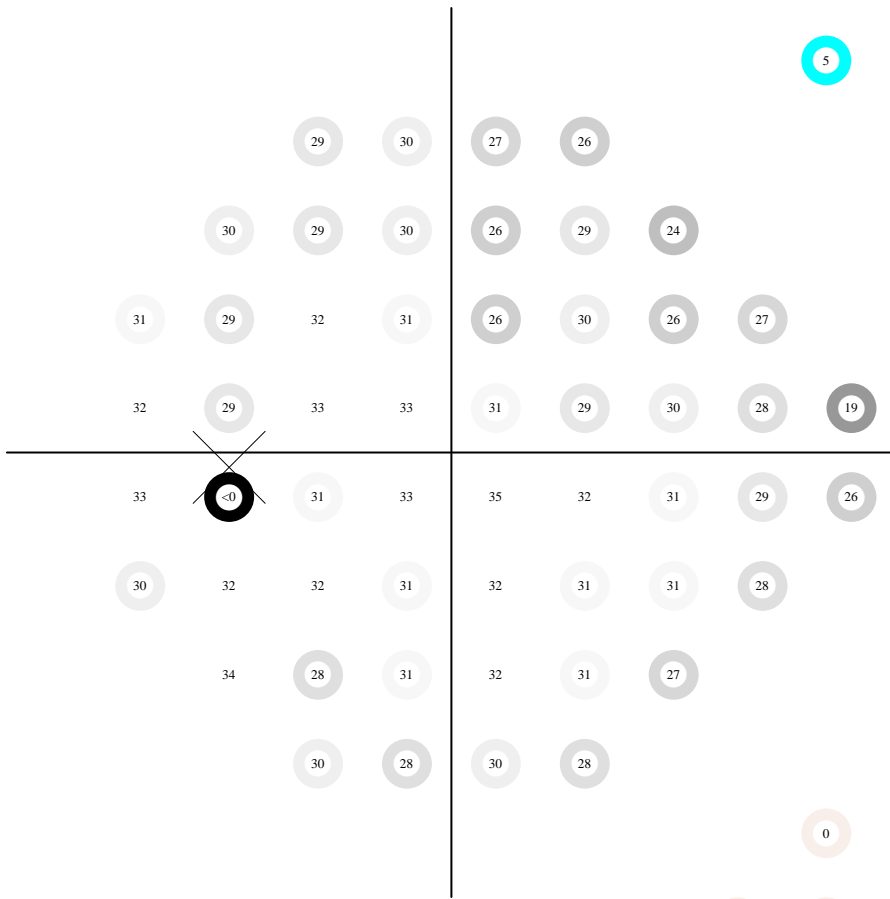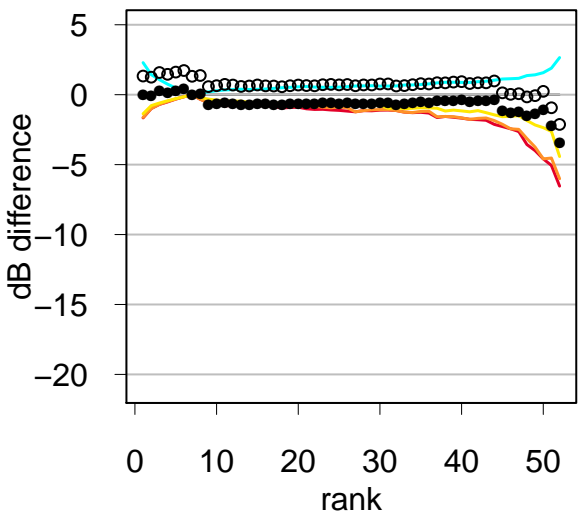

pattern deviation

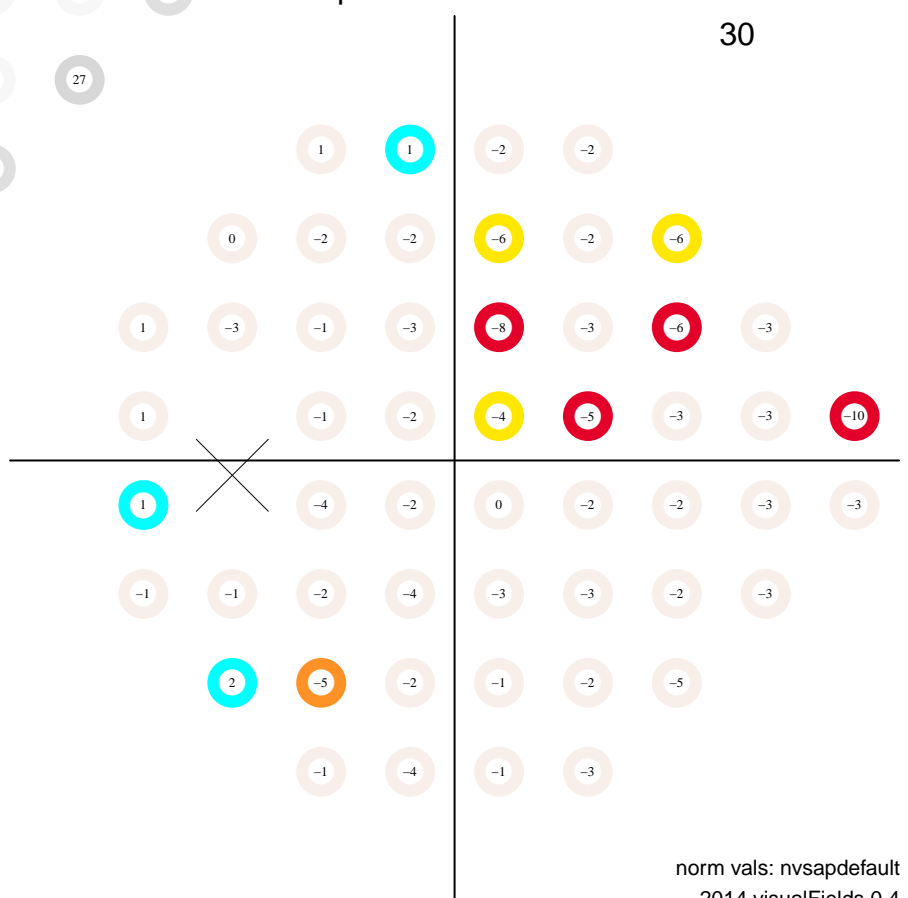

# Static Automated Perimetry. Single field analysis

Subject ID: 1021, age: 77, eye: OS (left)

Date: 10/19/2012 at 11:23

Duration: 05:07, pause: 00:00

false positives 1.0 %

false negatives 0.0 %

fixation losses 0.0 %

MS 29.0 dB

MD -0.3 dB (p < 95 %)

PSD 1.3 dB (p < 95 %)

VFI 100.0 % (p < 95 %)

GH 1.1 dB

total deviation

Central 24-2  
SITA standard

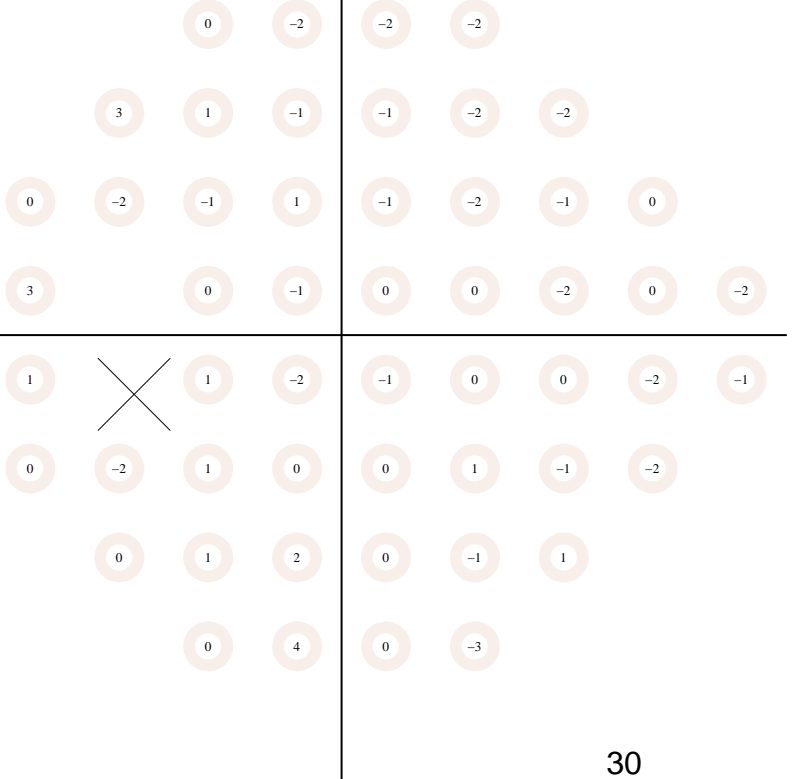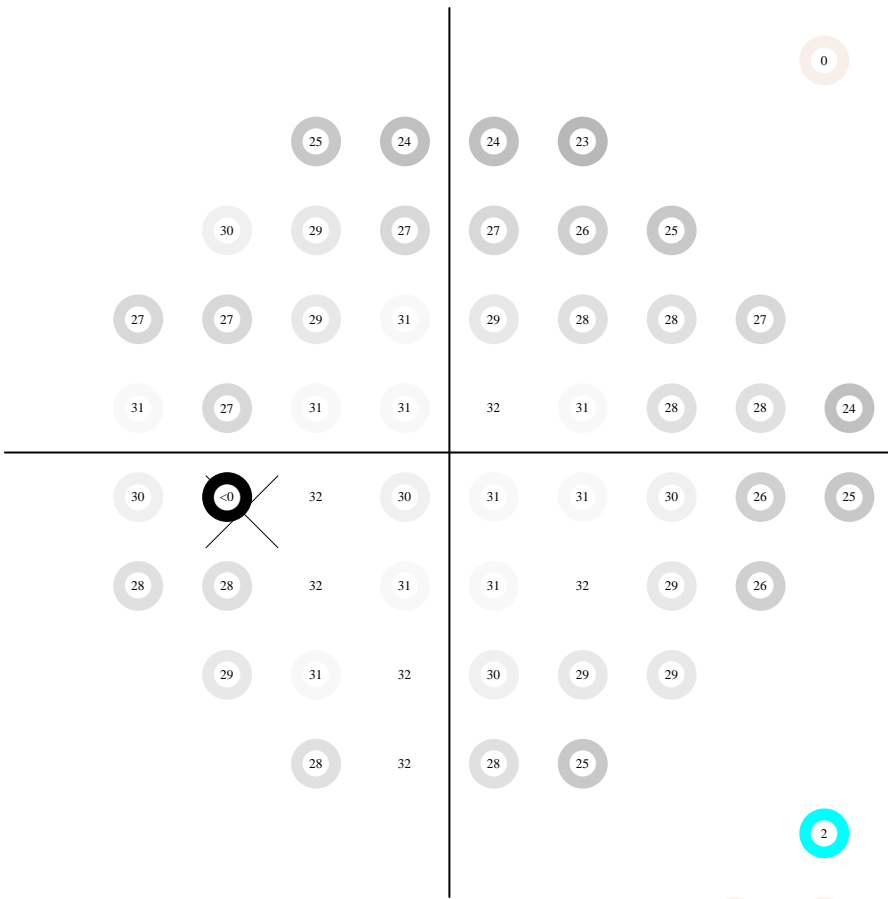

pattern deviation

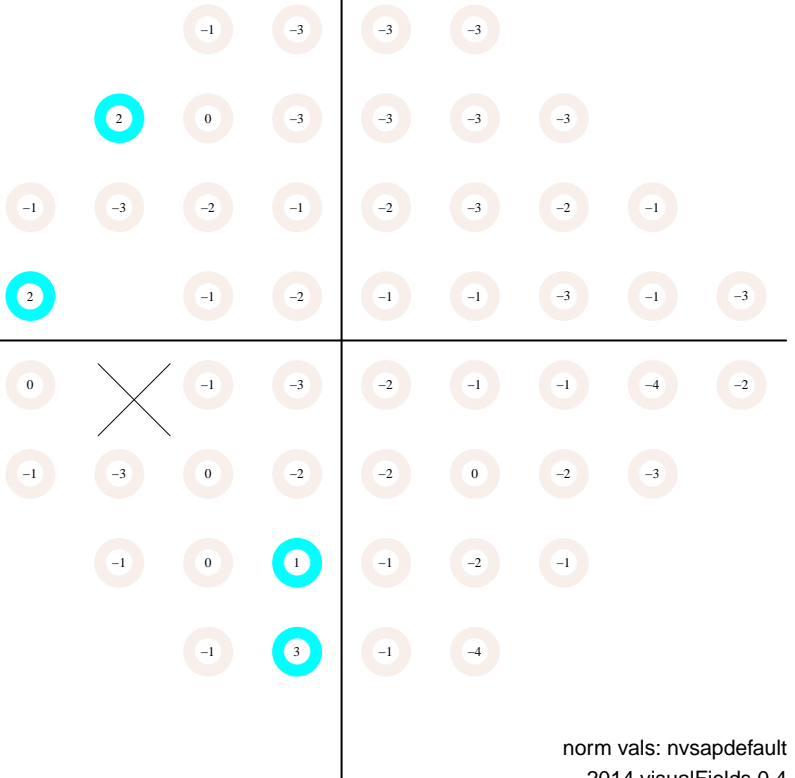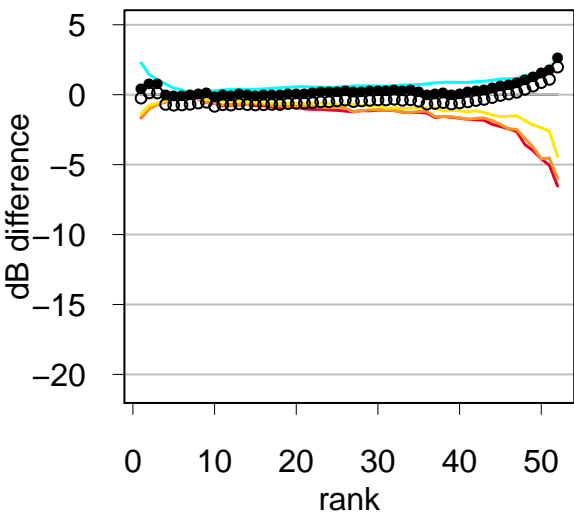



# Static Automated Perimetry. Single field analysis

Subject ID: 1021, age: 77, eye: OS (left)

Date: 01/17/2013 at 8:01:

Duration: 05:17, pause: 00:00

false positives 3.0 %

false negatives 3.0 %

fixation losses 6.7 %

MS 30.1 dB

MD 0.8 dB (p < 95 %)

PSD 2.3 dB (p < 95 %)

VFI 98.5 % (p < 95 %)

GH 3.3 dB

total deviation

Central 24-2  
SITA standard

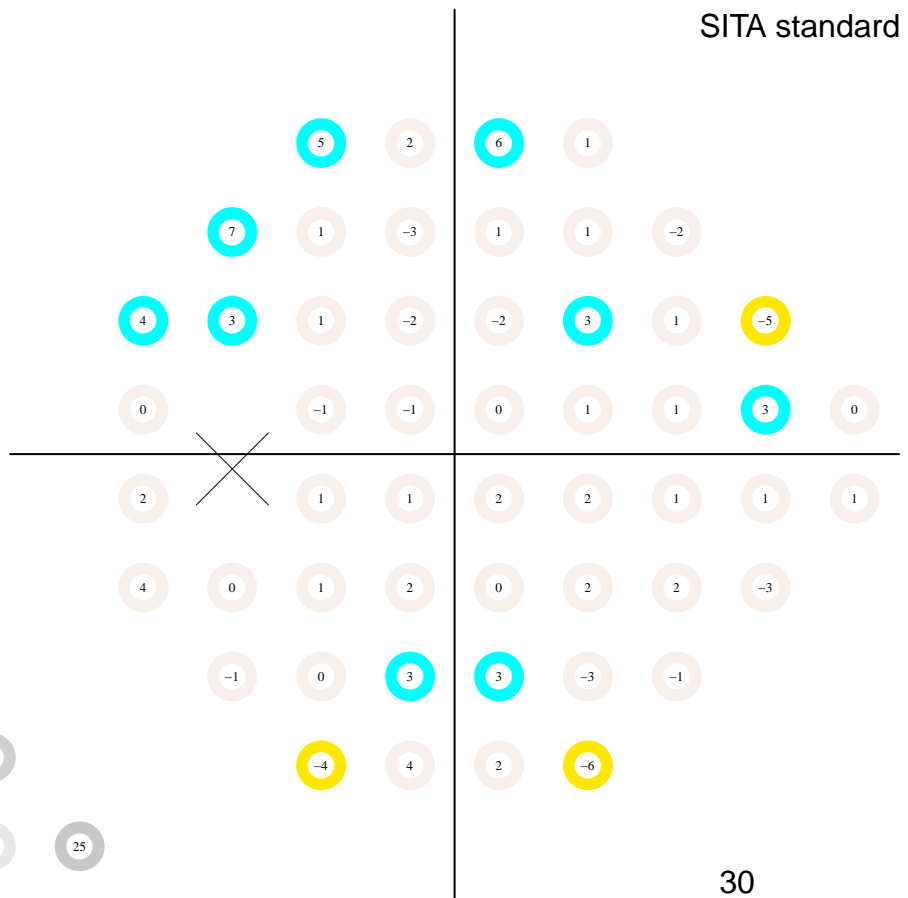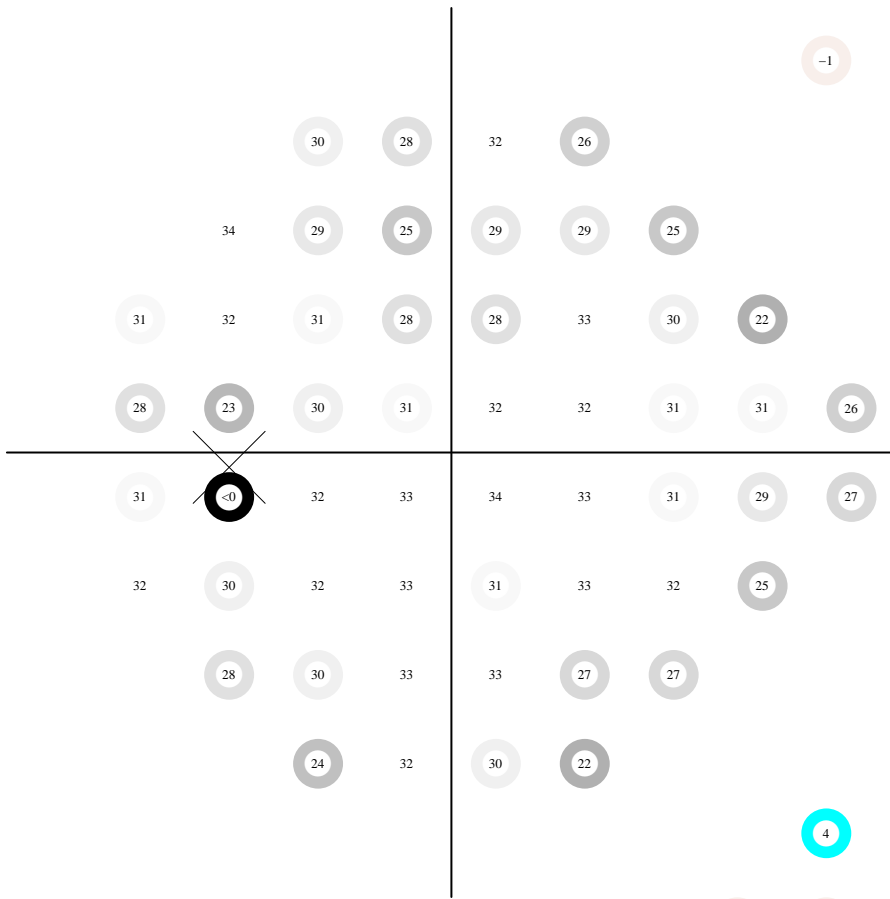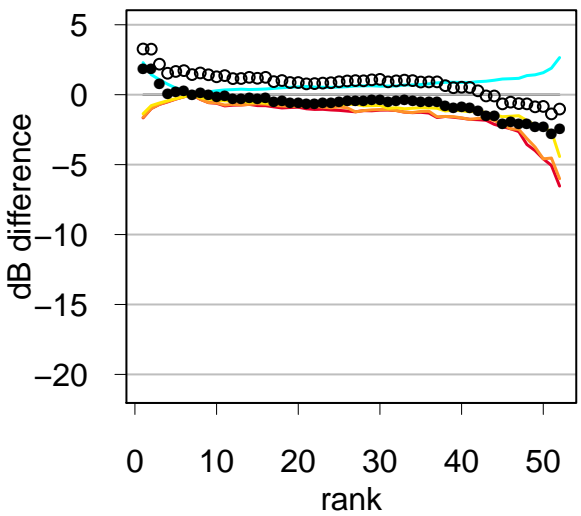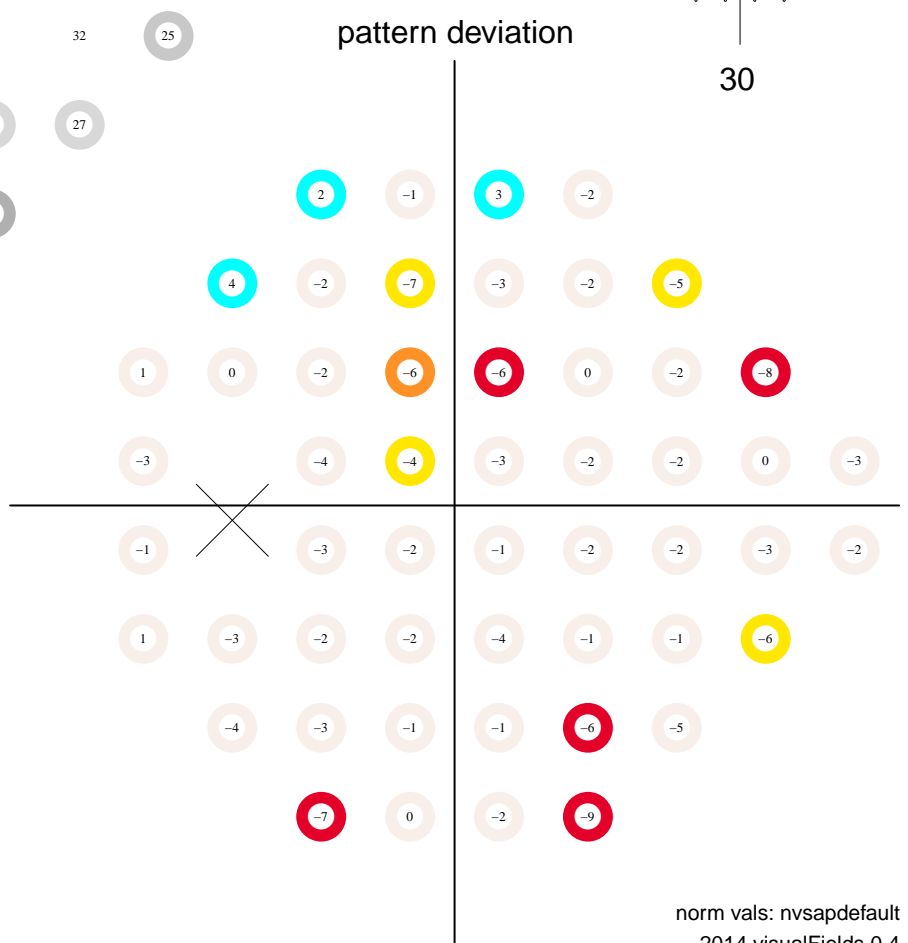

# Static Automated Perimetry. Single field analysis

Subject ID: 1021, age: 77, eye: OS (left)

Date: 04/09/2013 at 8:18:

Duration: 04:43, pause: 00:00

false positives 2.0 %

false negatives 0.0 %

fixation losses 7.1 %

MS 30.0 dB

MD 0.7 dB (p < 95 %)

PSD 1.9 dB (p < 95 %)

VFI 98.8 % (p < 95 %)

GH 3.2 dB

total deviation

Central 24-2  
SITA standard

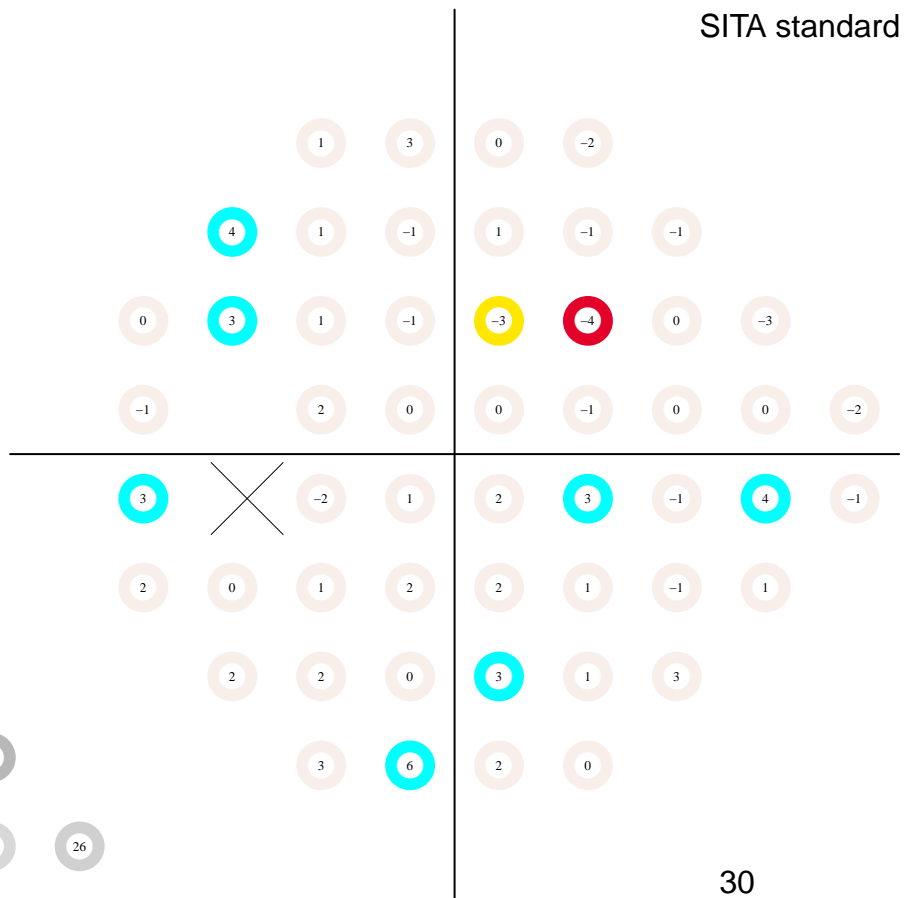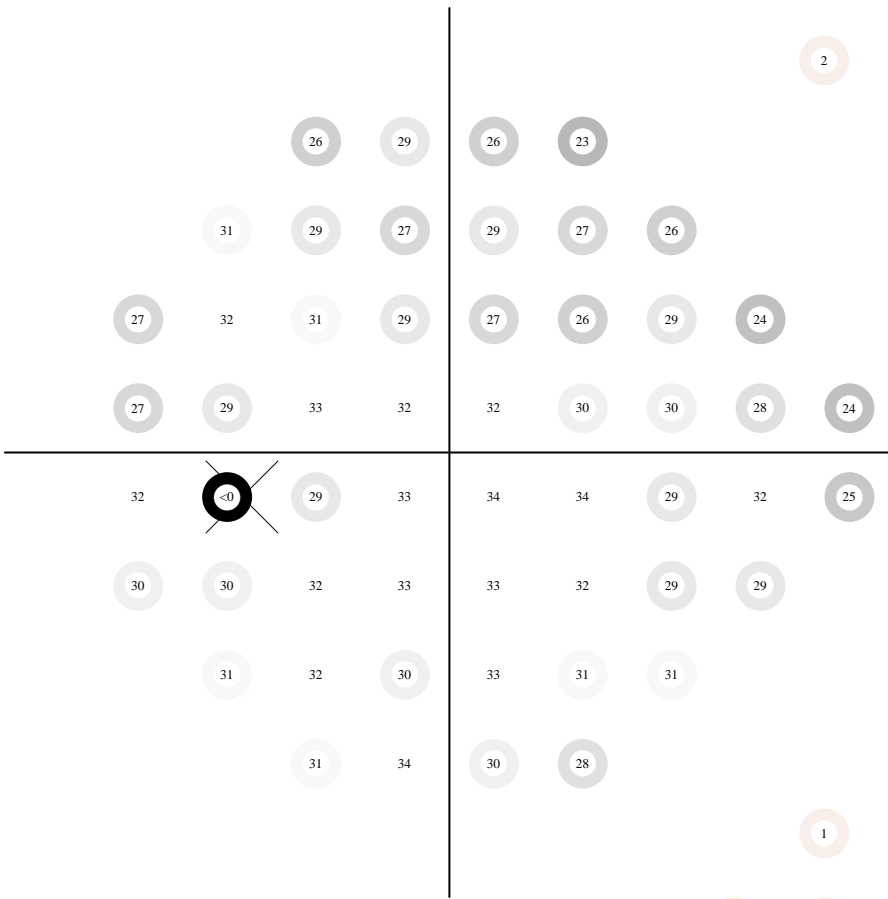

pattern deviation

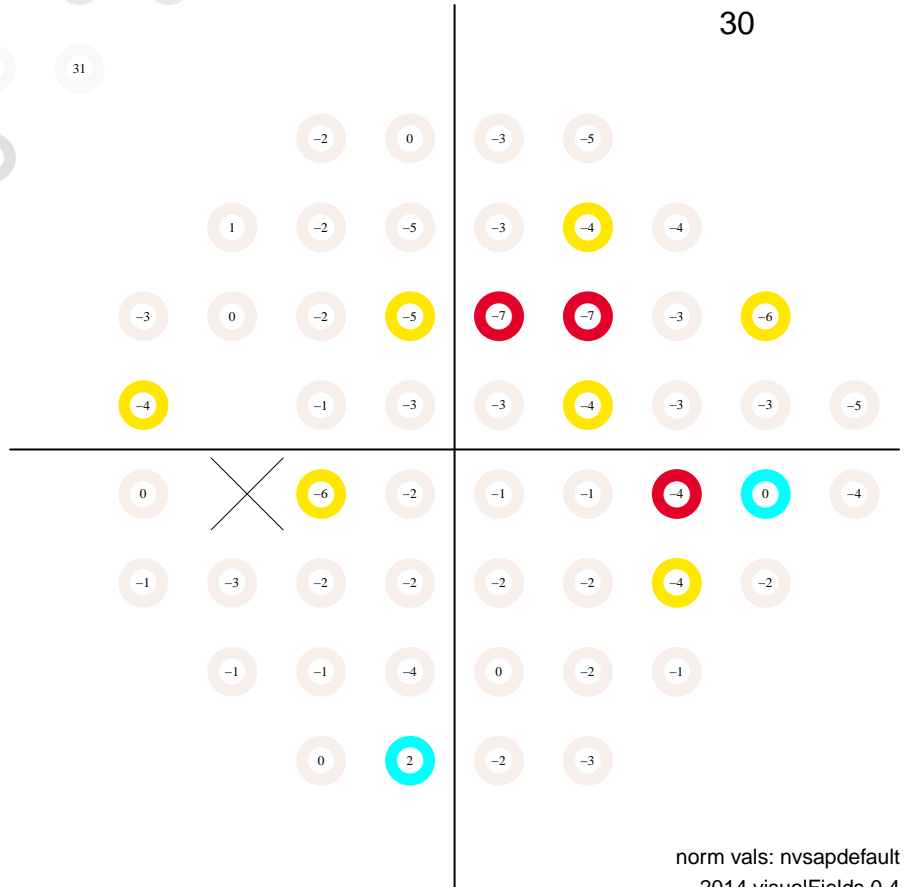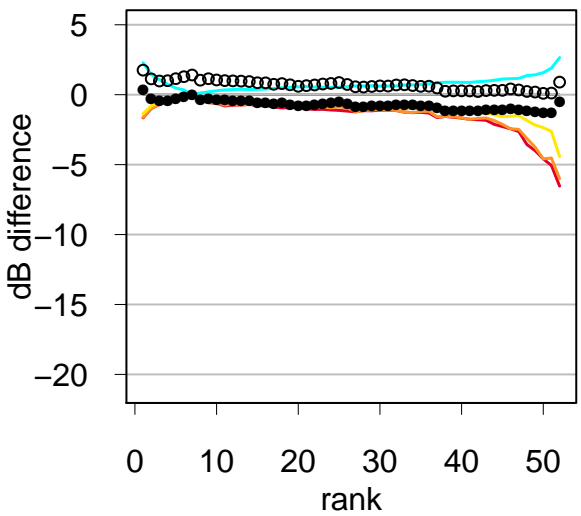

# Static Automated Perimetry. Single field analysis

Subject ID: 1021, age: 77, eye: OS (left)

Date: 07/16/2013 at 10:23

Duration: 04:16, pause: 00:00

false positives 5.0 %

false negatives 0.0 %

fixation losses 0.0 %

MS 31.7 dB

MD 2.3 dB (p < 100 %)

PSD 1.3 dB (p < 100 %)

VFI 100.0 % (p < 95 %)

GH 4.0 dB

total deviation

Central 24-2  
SITA standard

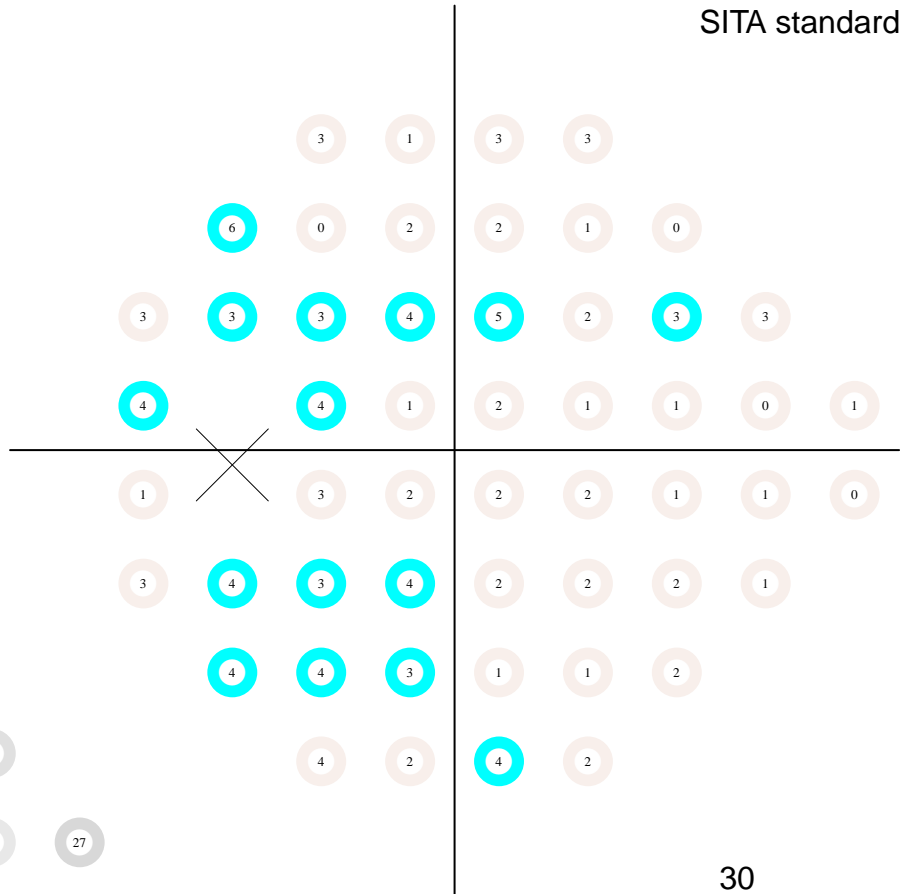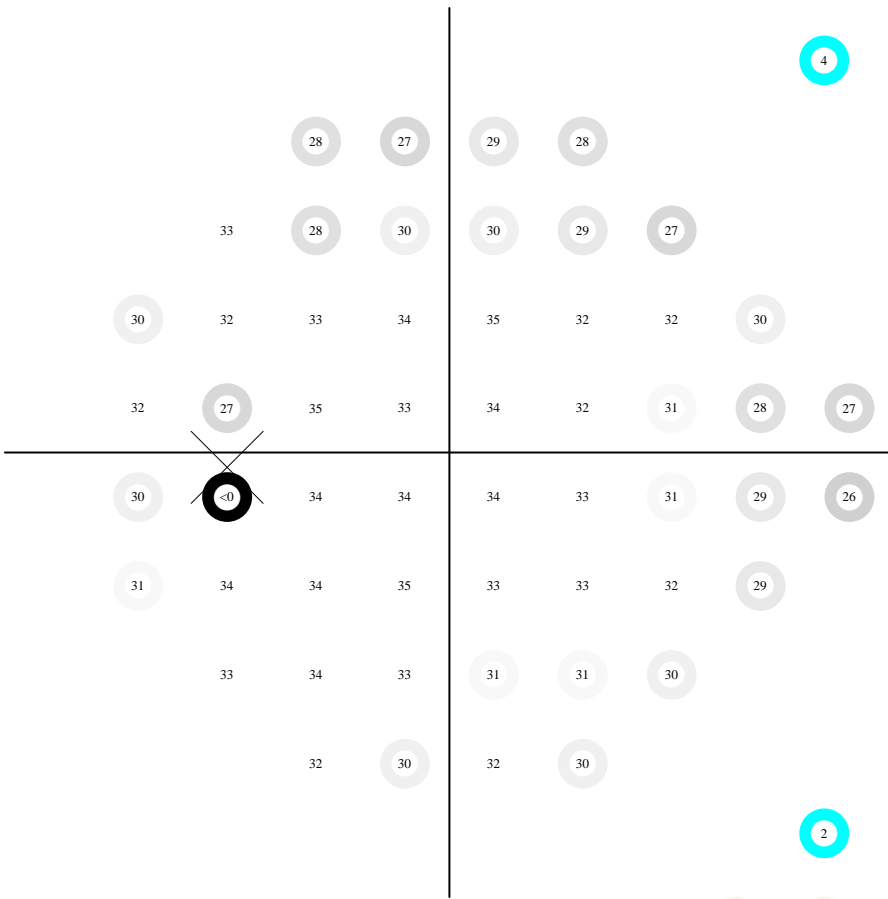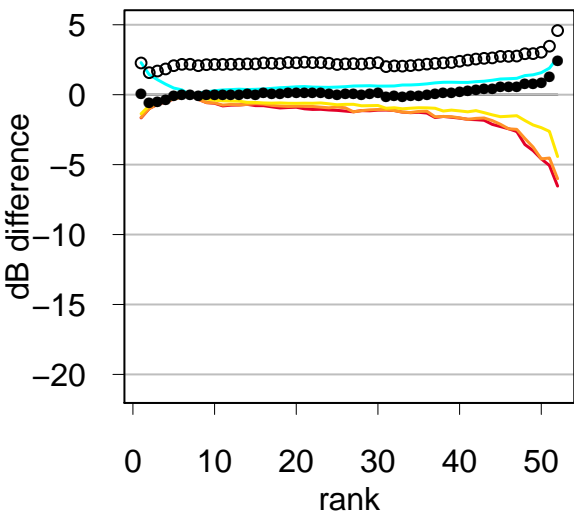

pattern deviation

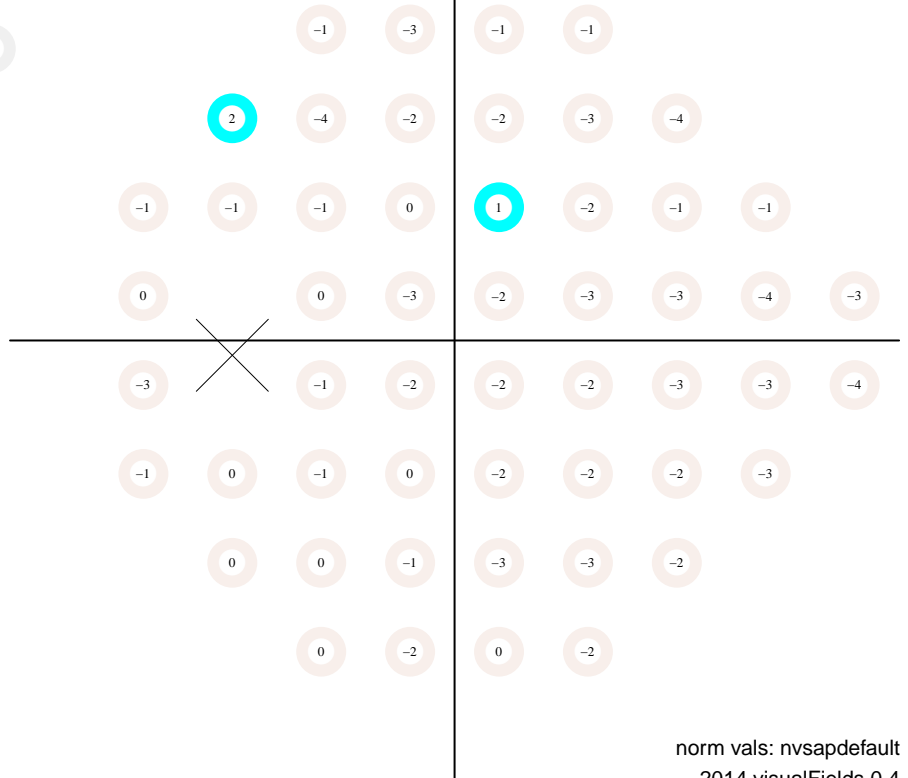

# Static Automated Perimetry. Single field analysis

Subject ID: 1022, age: 65, eye: OS (left)

Date: 09/20/2006 at 9:24:

Duration: 04:30, pause: 00:00

false positives 0.0 %

false negatives 6.0 %

fixation losses 0.0 %

MS 30.6 dB

MD 0.5 dB (p < 95 %)

PSD 2.0 dB (p < 95 %)

VFI 98.1 % (p < 95 %)

GH 3.2 dB

total deviation

Central 24-2

SITA standard

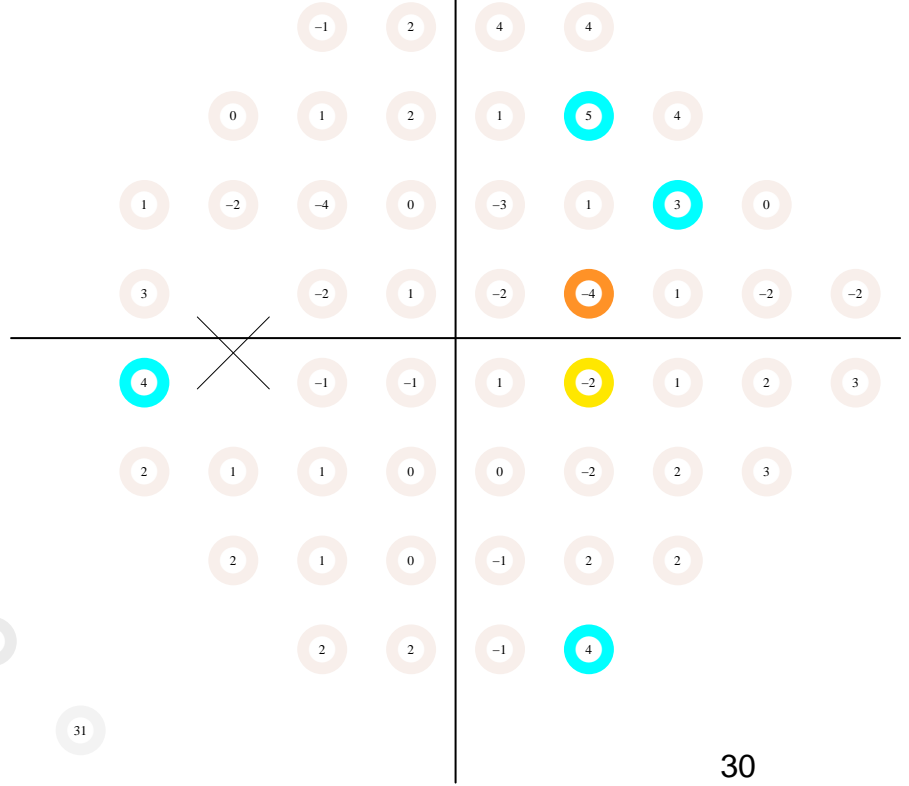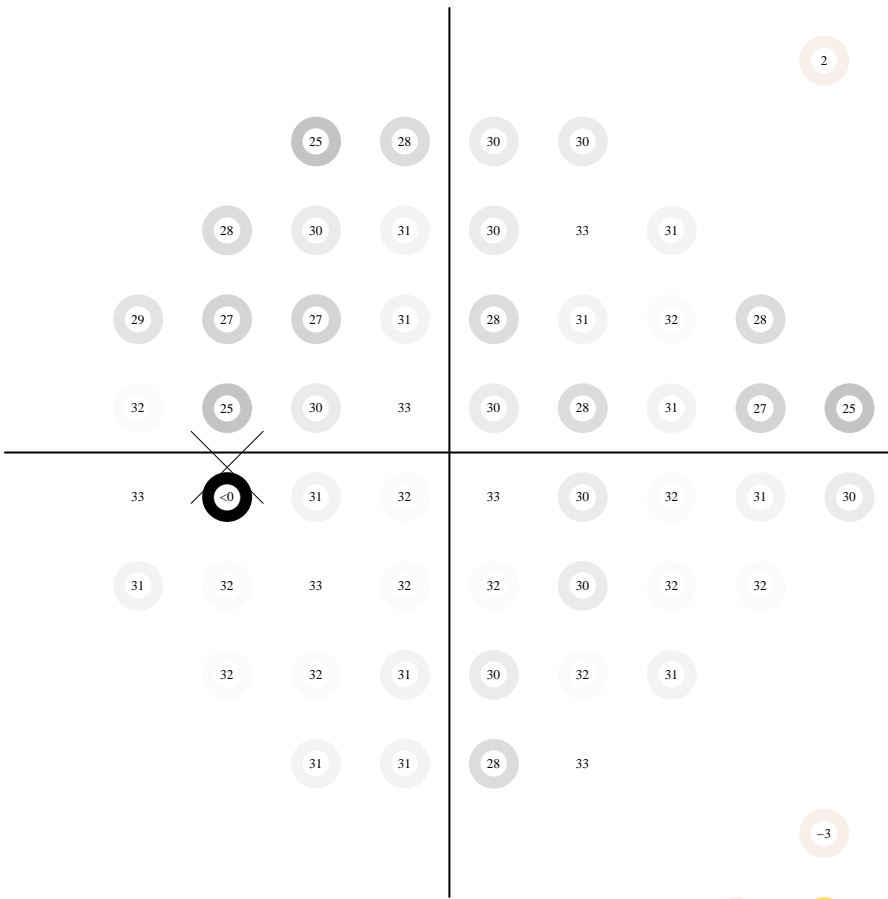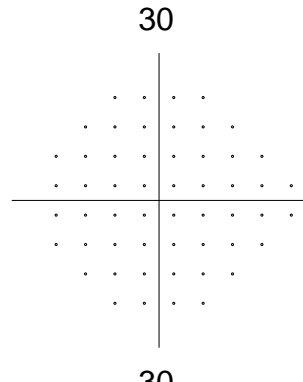

pattern deviation

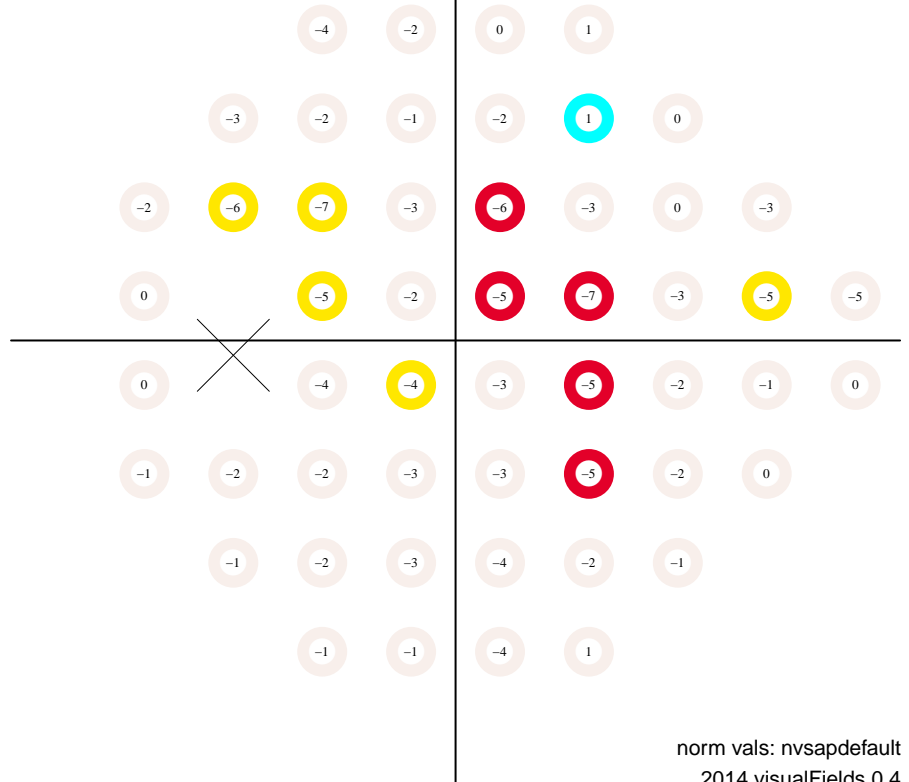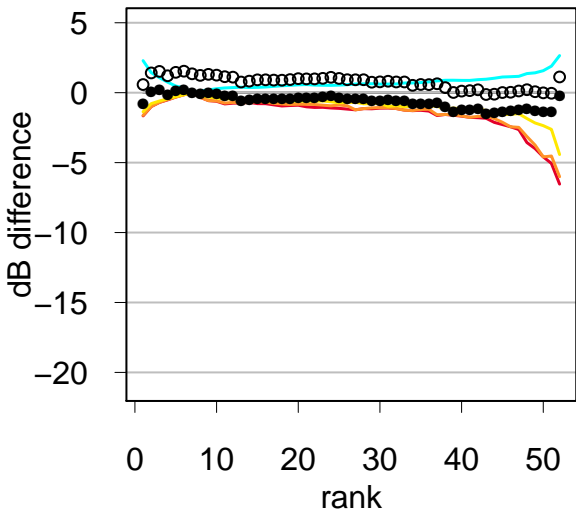

# Static Automated Perimetry. Single field analysis

Subject ID: 1022, age: 65, eye: OS (left)

Date: 12/11/2006 at 8:19:

Duration: 05:06, pause: 00:00

false positives 3.0 %

false negatives 4.0 %

fixation losses 0.0 %

MS 30.2 dB

MD 0.2 dB (p < 95 %)

PSD 3.1 dB (p < 95 %)

VFI 97.5 % (p < 5 %)

GH 2.6 dB

total deviation

Central 24-2  
SITA standard

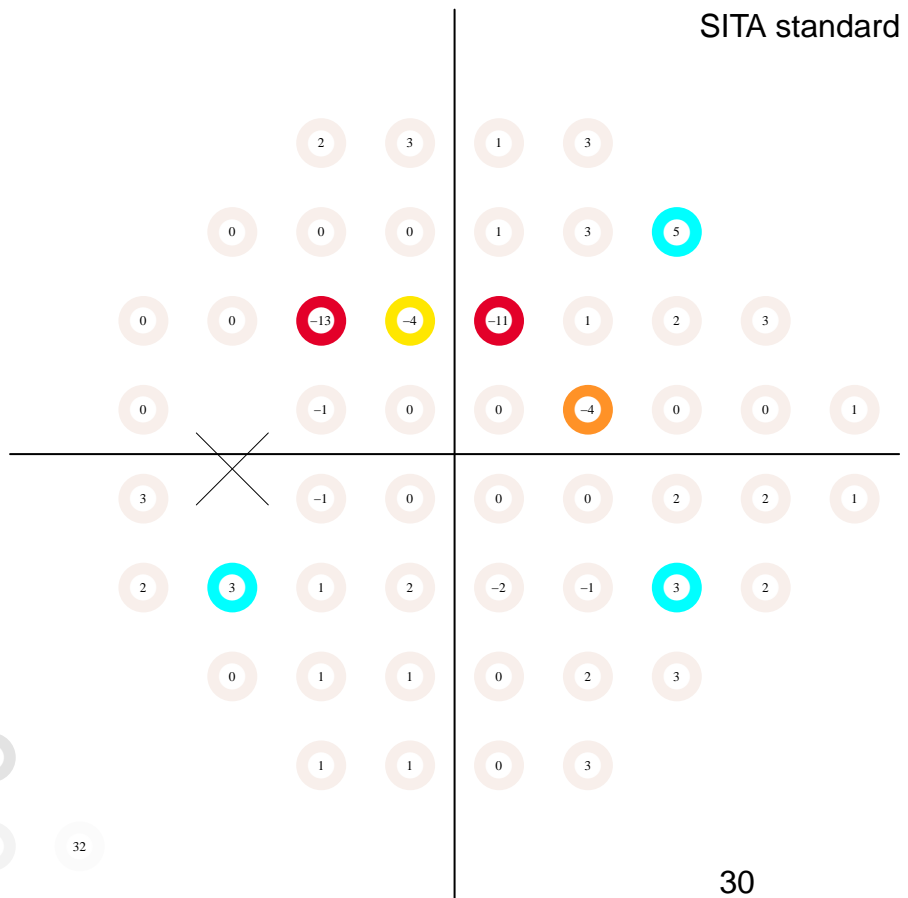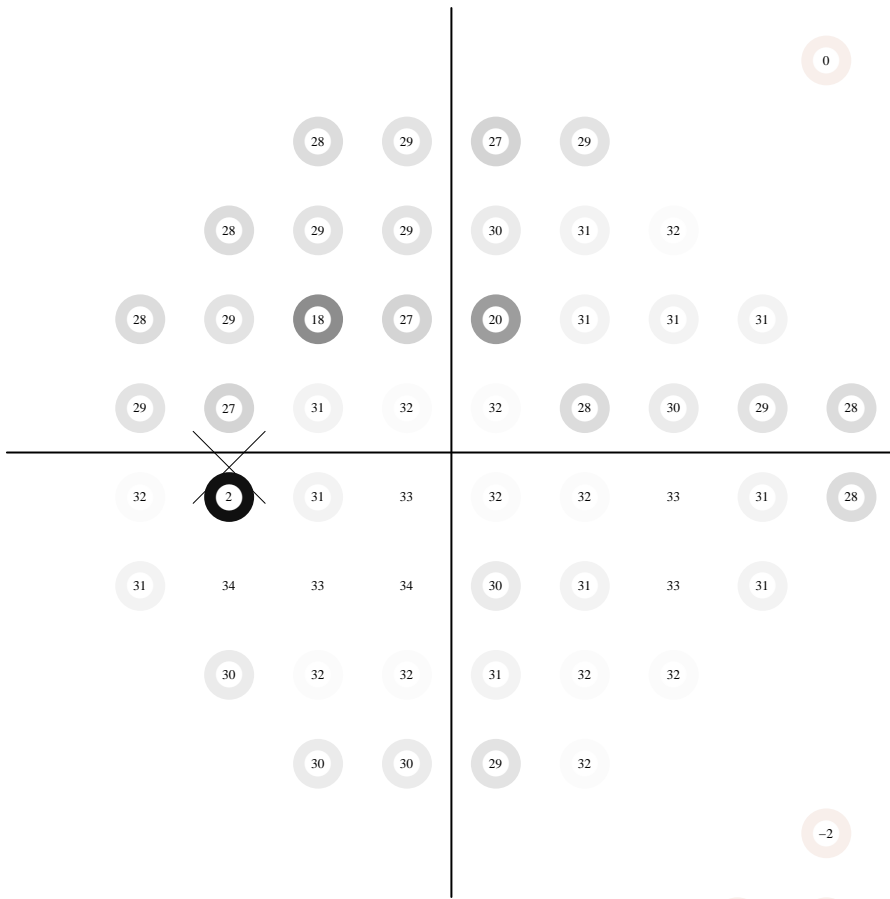

pattern deviation

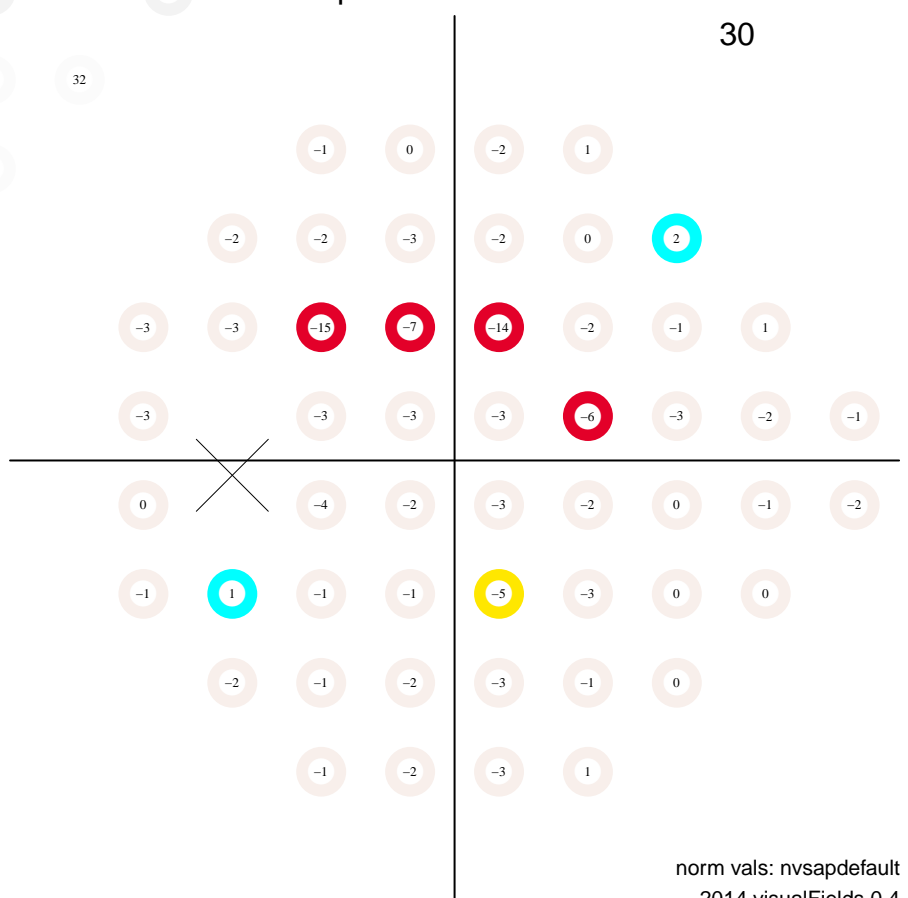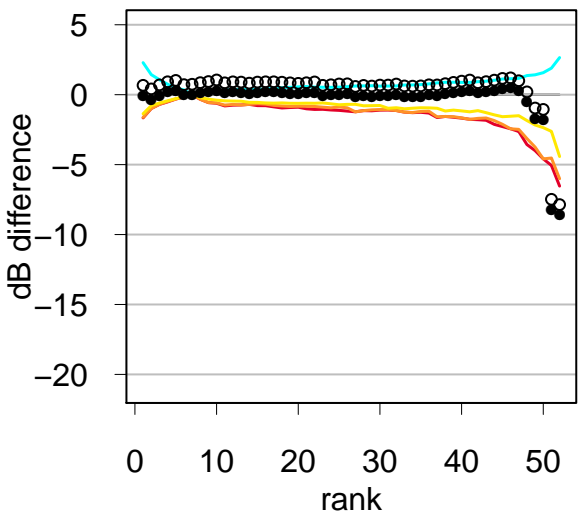

# Static Automated Perimetry. Single field analysis

Subject ID: 1022, age: 65, eye: OS (left)

Date: 04/03/2007 at 8:17:

Duration: 05:07, pause: 00:00

false positives 5.0 %

false negatives 1.0 %

fixation losses 0.0 %

MS 30.7 dB

MD 0.6 dB (p < 95 %)

PSD 3.0 dB (p < 95 %)

VFI 97.0 % (p < 5 %)

GH 3.9 dB

total deviation

Central 24-2  
SITA standard

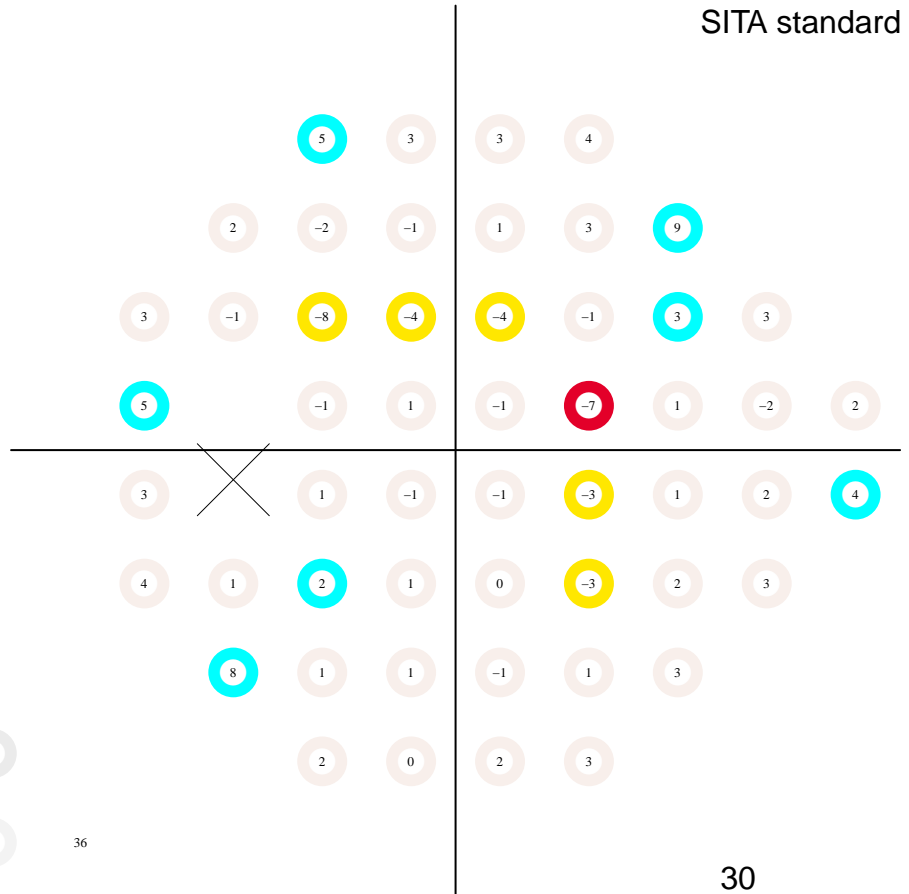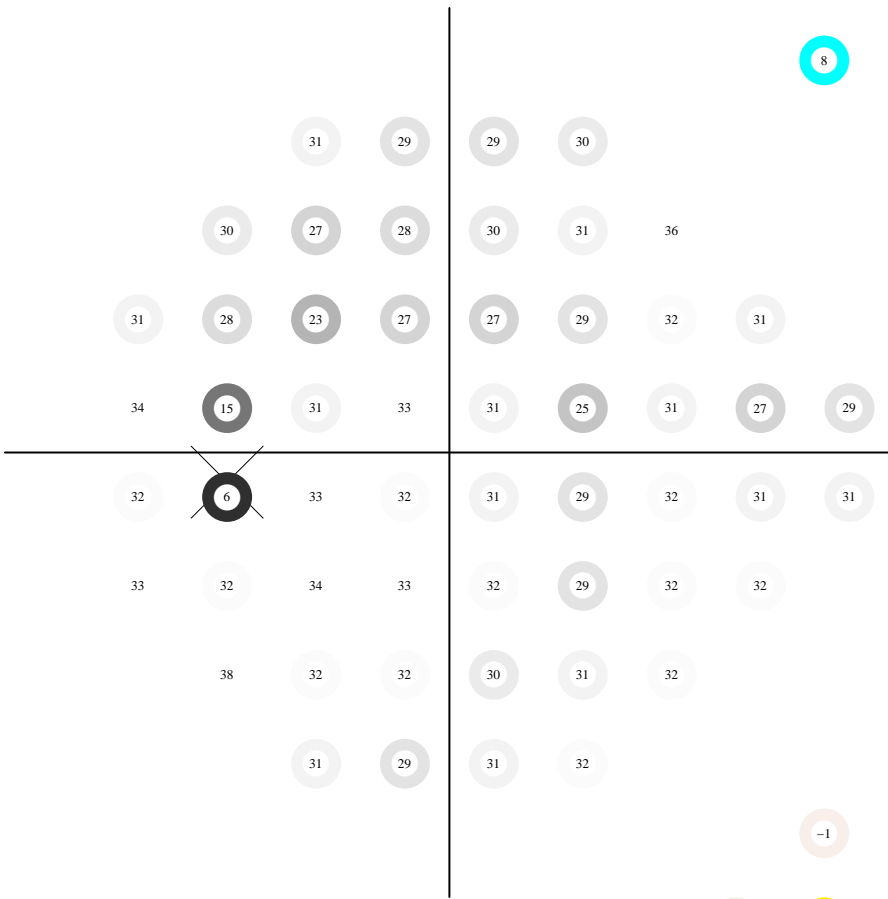

pattern deviation

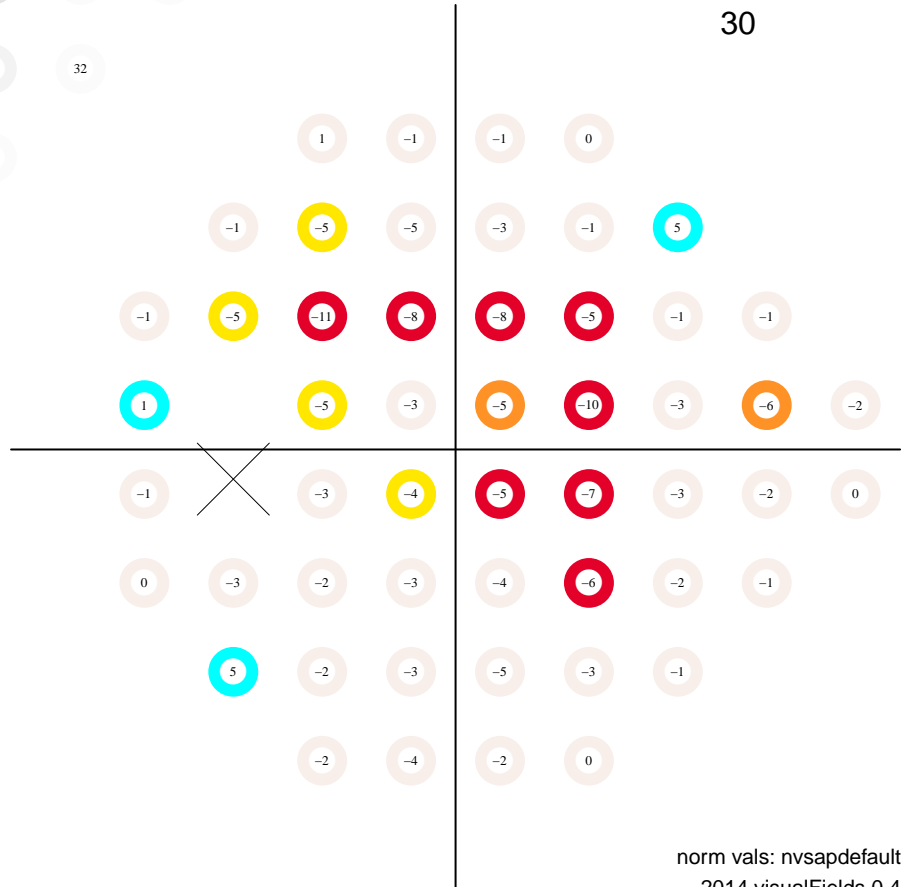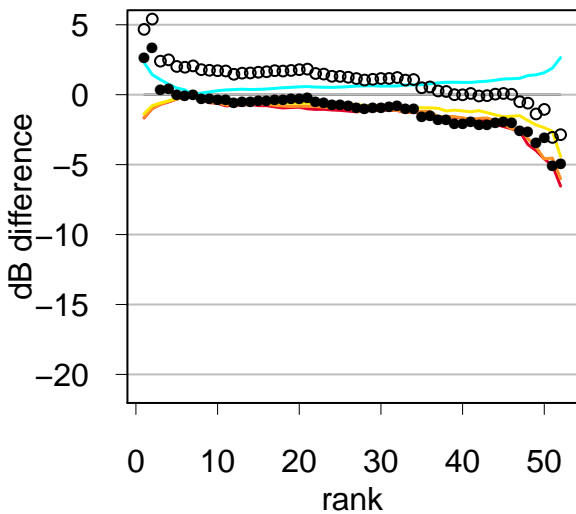

# Static Automated Perimetry. Single field analysis

Subject ID: 1022, age: 66, eye: OS (left)

Date: 10/02/2007 at 9:33:

Duration: 04:42, pause: 00:00

false positives 4.0 %

false negatives 0.0 %

fixation losses 0.0 %

MS 30.1 dB

MD 0.1 dB (p < 95 %)

PSD 3.2 dB (p < 95 %)

VFI 97.1 % (p < 5 %)

GH 3.0 dB

total deviation

Central 24-2  
SITA standard

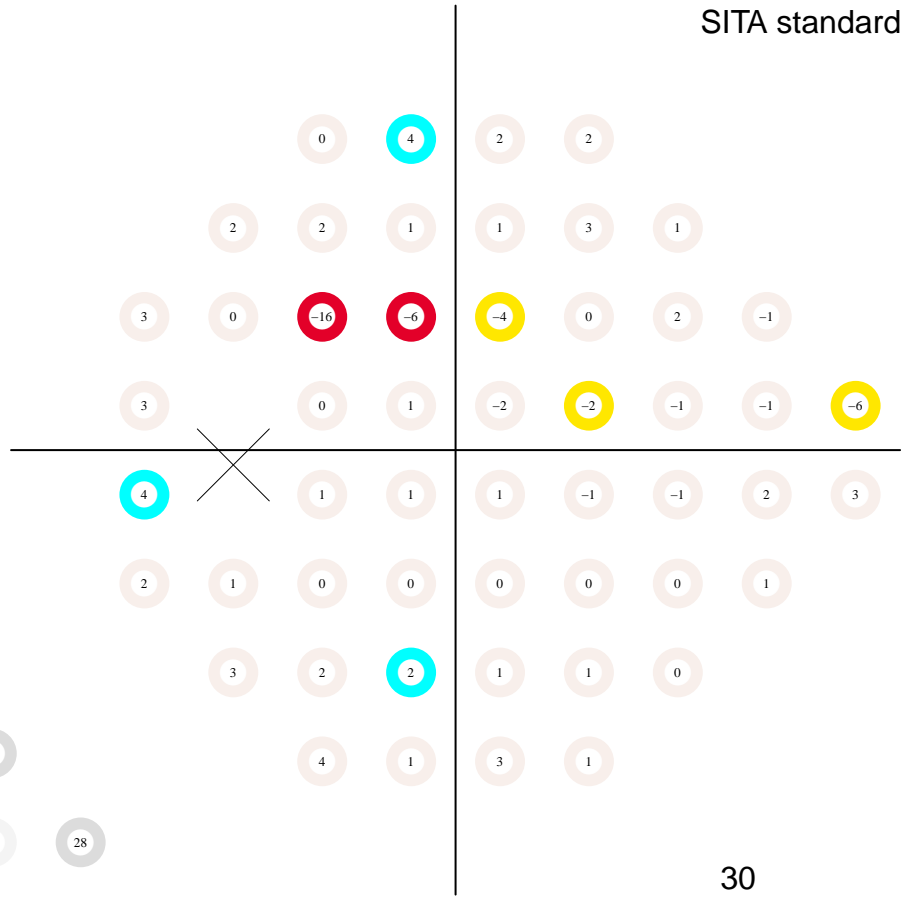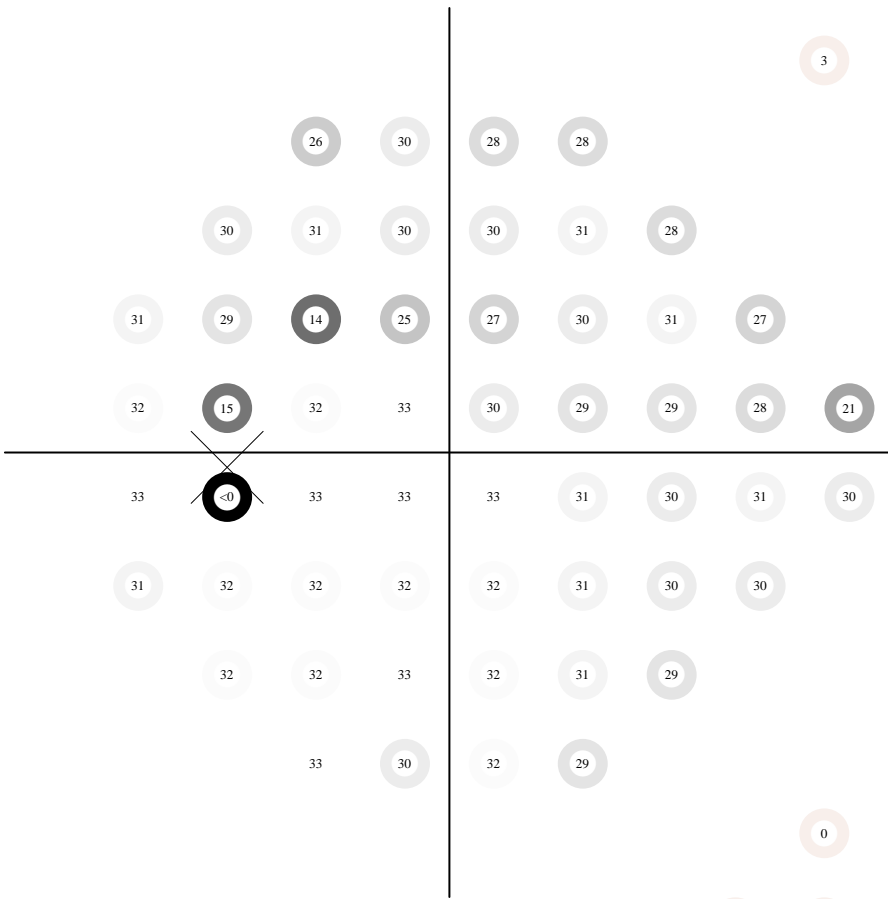

pattern deviation

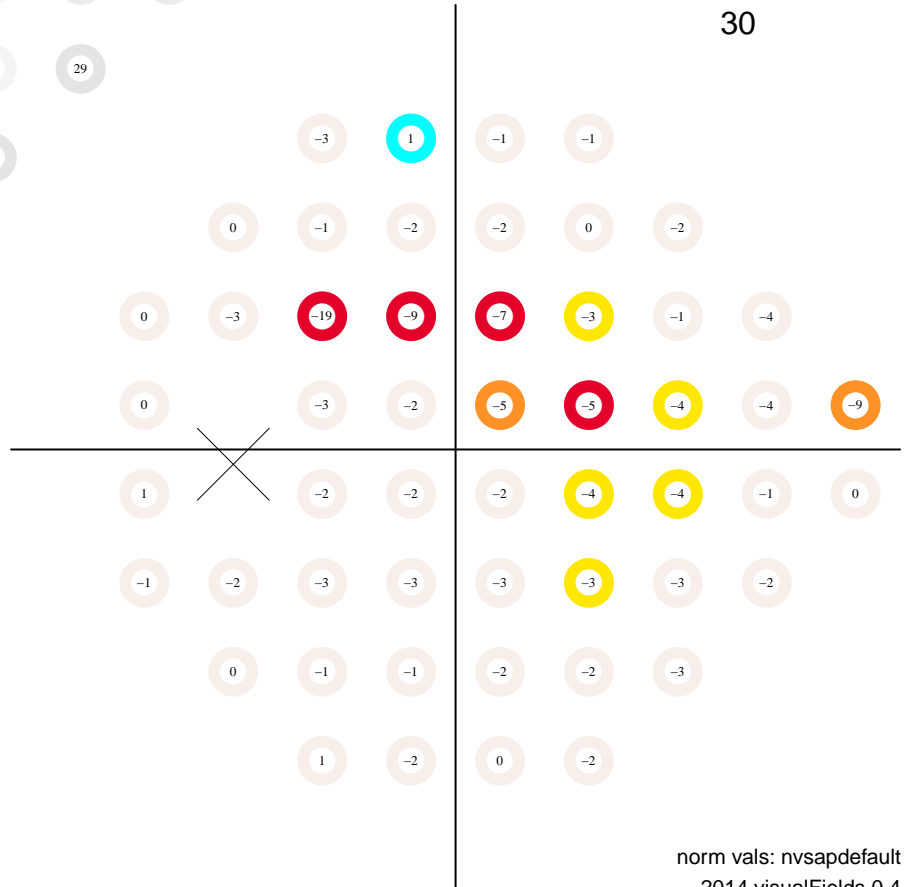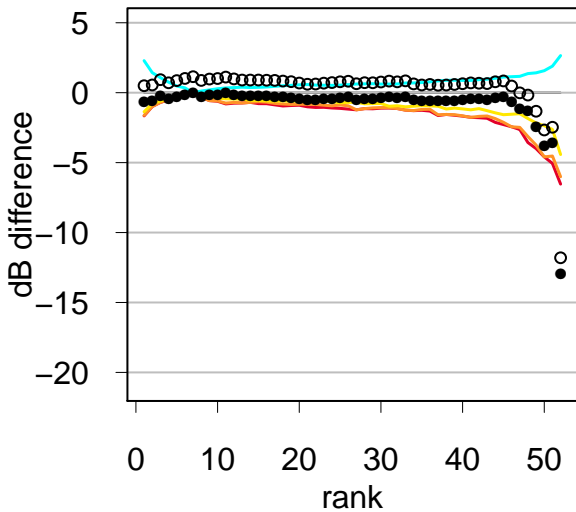

# Static Automated Perimetry. Single field analysis

Subject ID: 1022, age: 66, eye: OS (left)

Date: 03/26/2008 at 8:20:

Duration: 05:19, pause: 00:00

false positives 1.0 %

false negatives 0.0 %

fixation losses 17.6 %

MS 29.0 dB

MD -0.9 dB (p < 95 %)

PSD 5.2 dB (p < 95 %)

VFI 94.9 % (p < 0.5 %)

GH 2.0 dB

total deviation

Central 24-2  
SITA standard

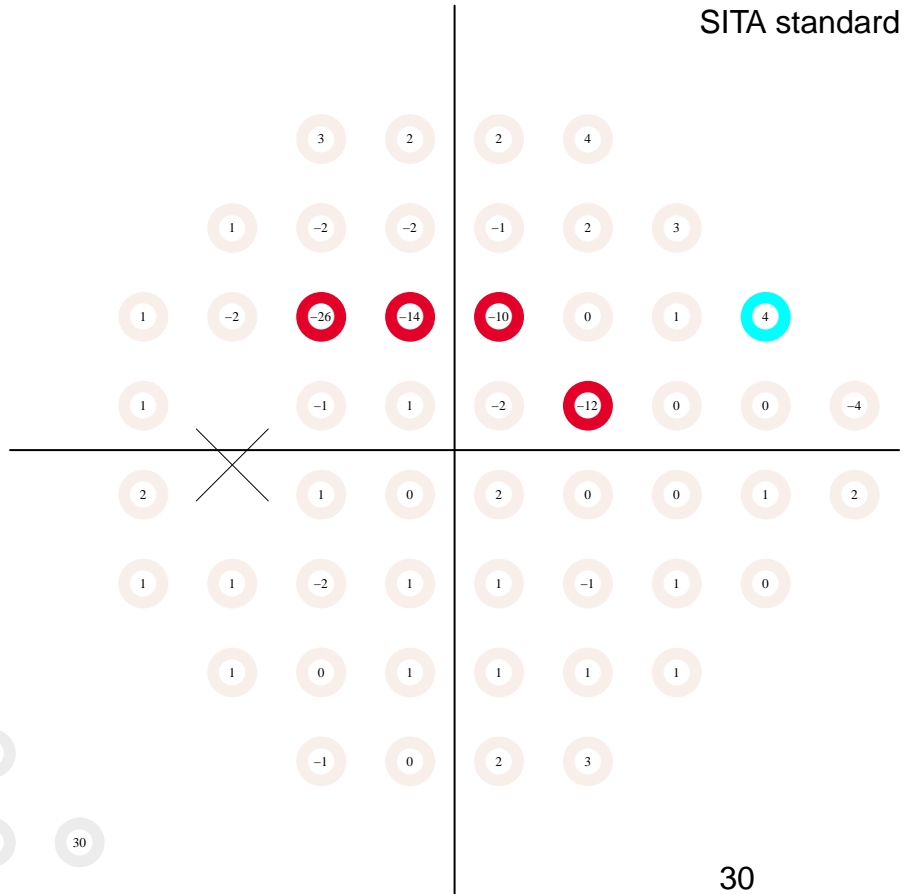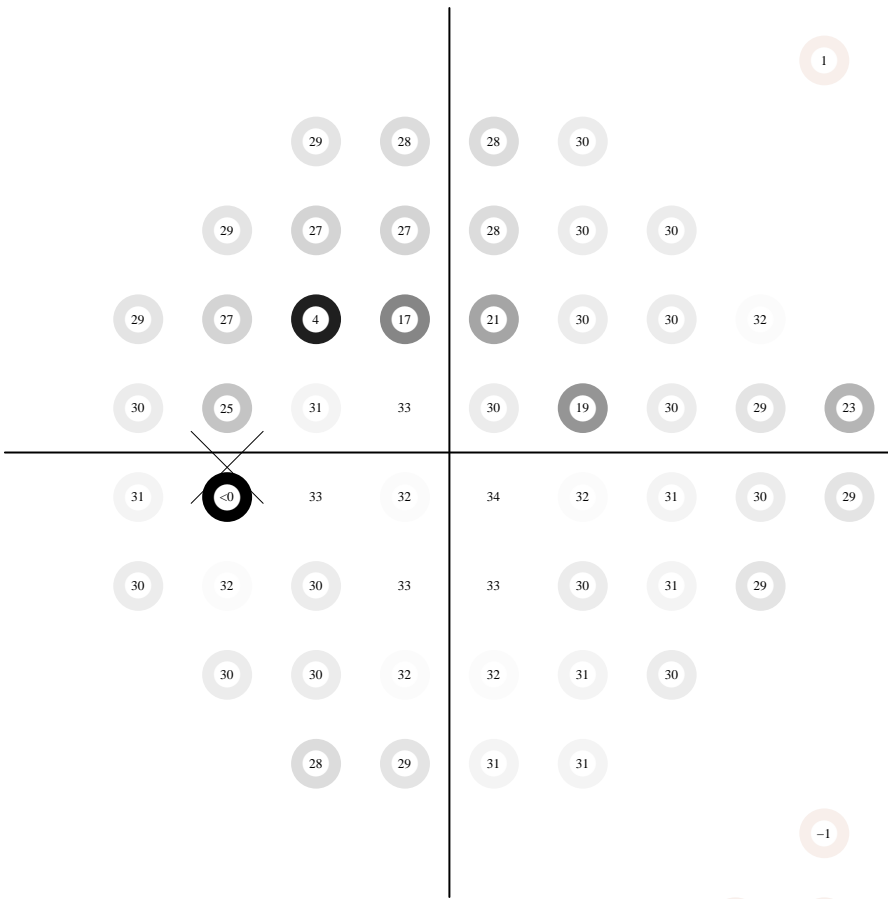

pattern deviation

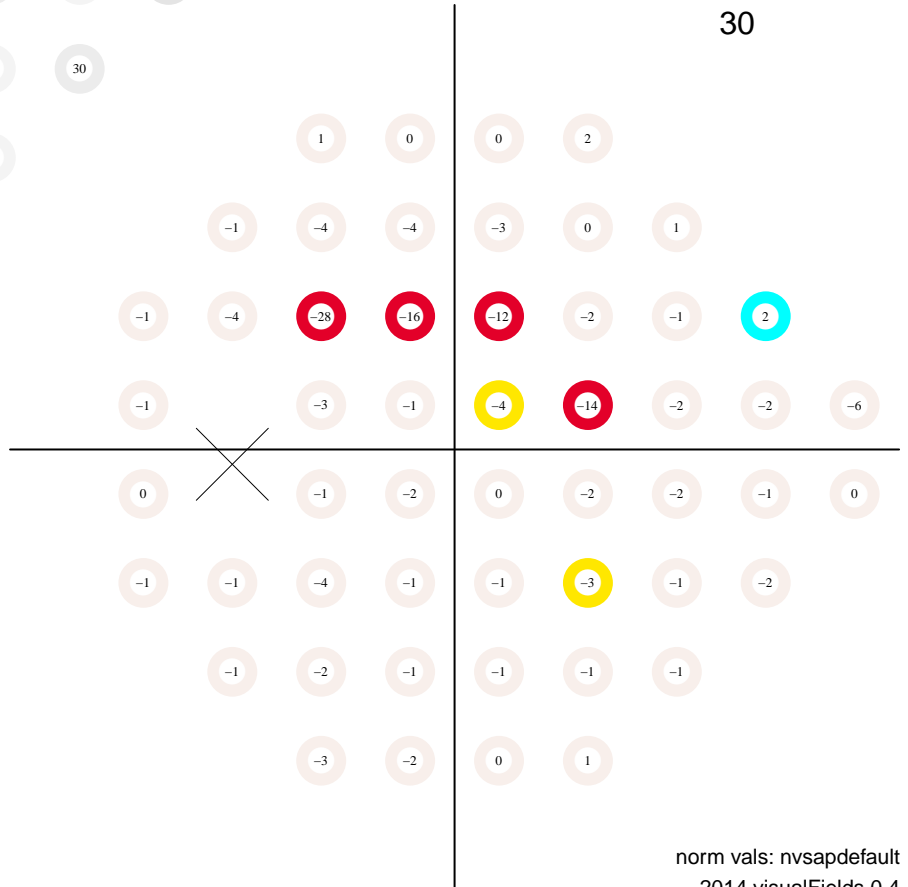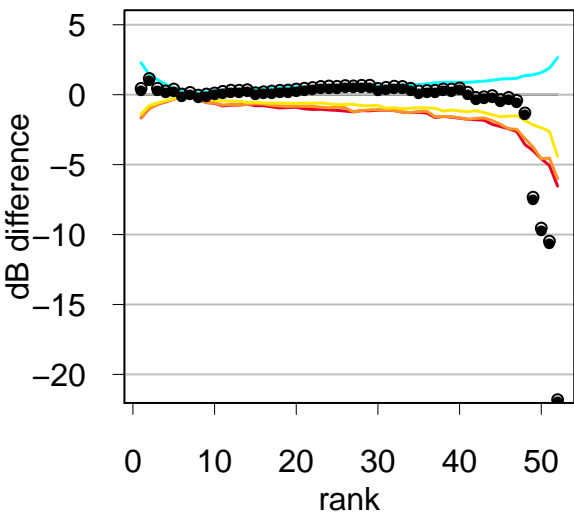



# Static Automated Perimetry. Single field analysis

Subject ID: 1022, age: 66, eye: OS (left)

Date: 04/01/2008 at 7:54:

Duration: 05:24, pause: 00:00

false positives 1.0 %

false negatives 3.0 %

fixation losses 13.3 %

MS 29.9 dB

MD -0.1 dB (p < 95 %)

PSD 5.0 dB (p < 95 %)

VFI 96.3 % (p < 1 %)

GH 3.0 dB

total deviation

Central 24-2  
SITA standard

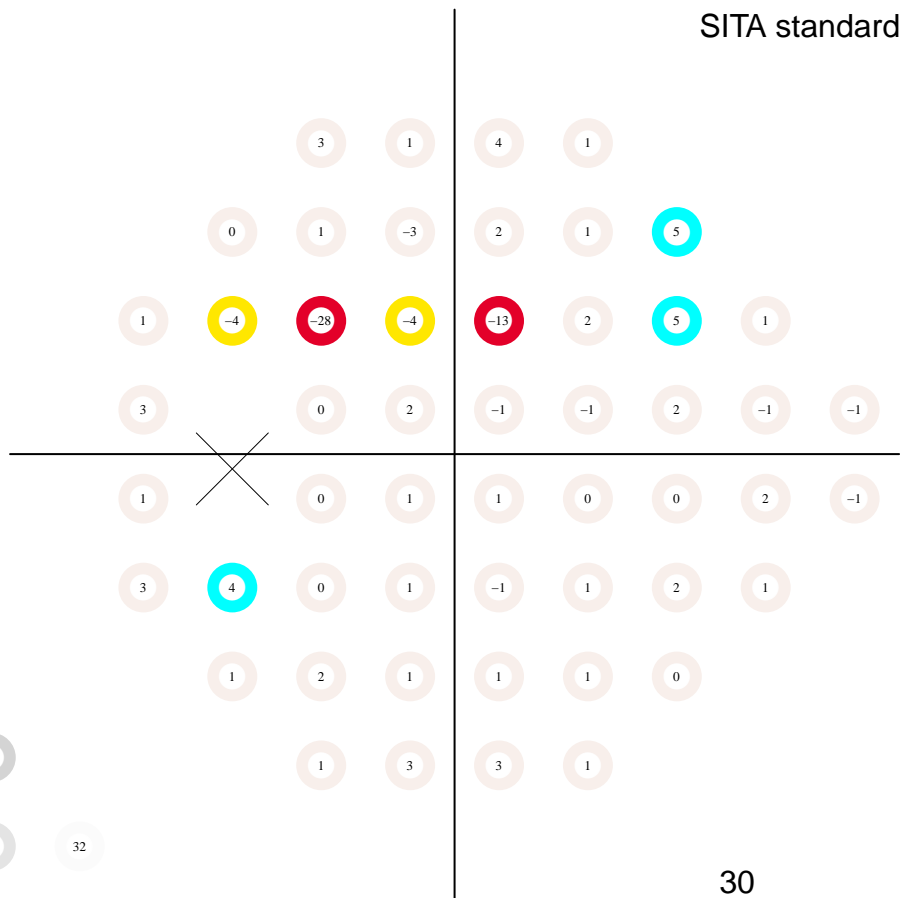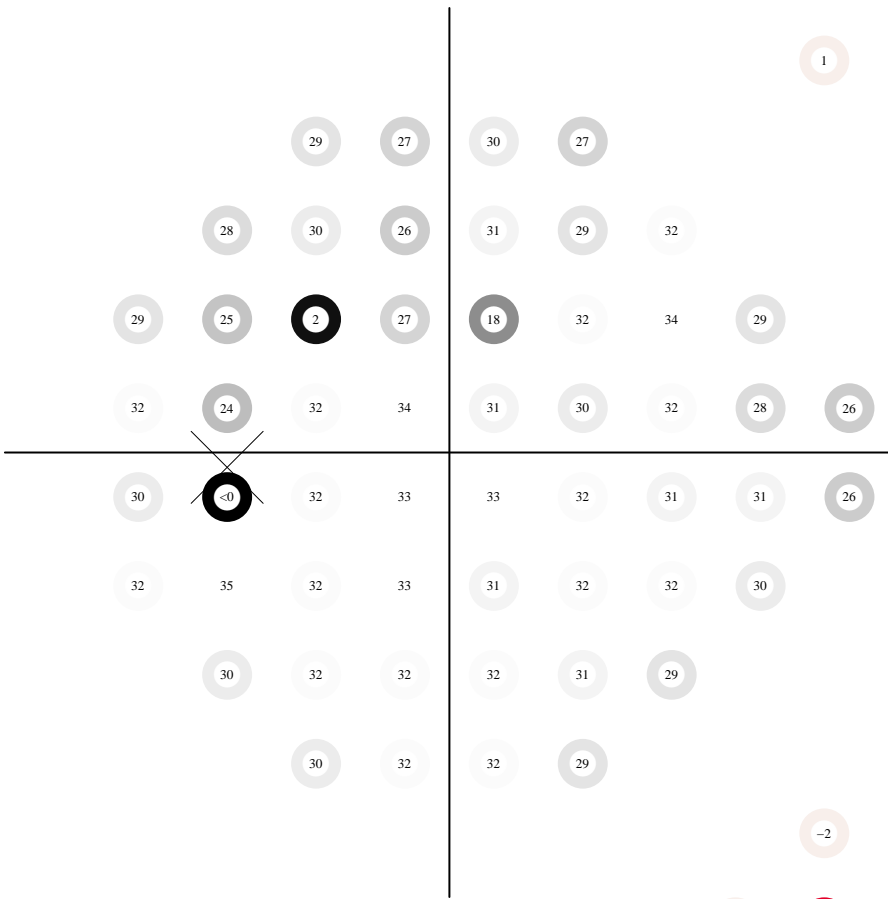

pattern deviation

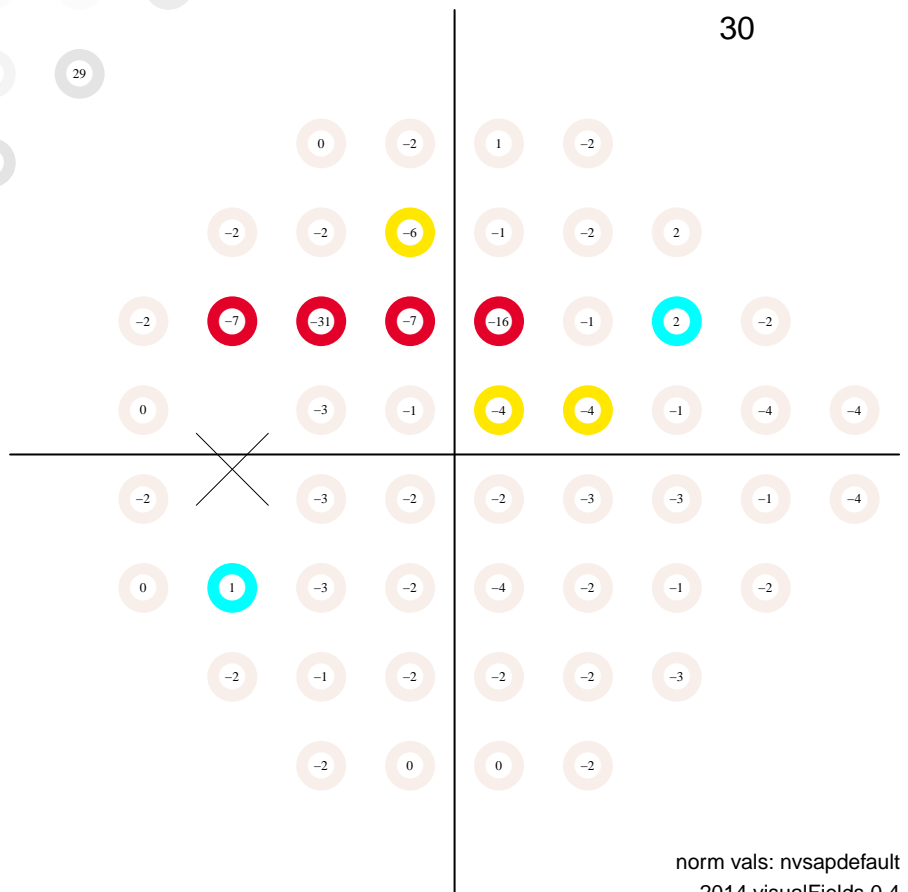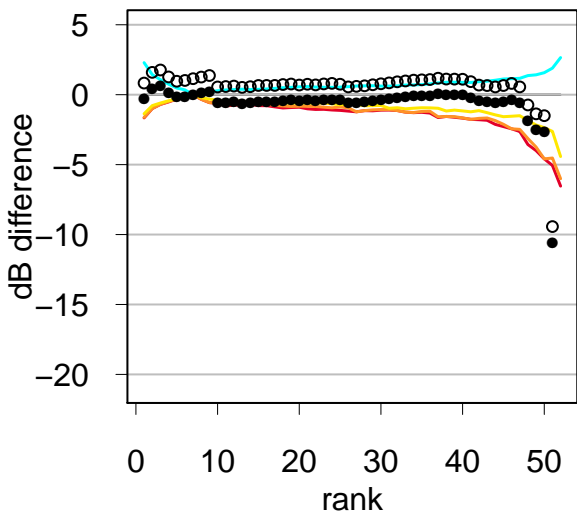

# Static Automated Perimetry. Single field analysis

Subject ID: 1022, age: 67, eye: OS (left)

Date: 10/07/2008 at 8:39:

Duration: 05:40, pause: 00:00

false positives 0.0 %

false negatives 0.0 %

fixation losses 6.7 %

MS 29.1 dB

MD -0.8 dB (p < 95 %)

PSD 4.1 dB (p < 95 %)

VFI 94.8 % (p < 0.5 %)

GH 2.7 dB

total deviation

Central 24-2  
SITA standard

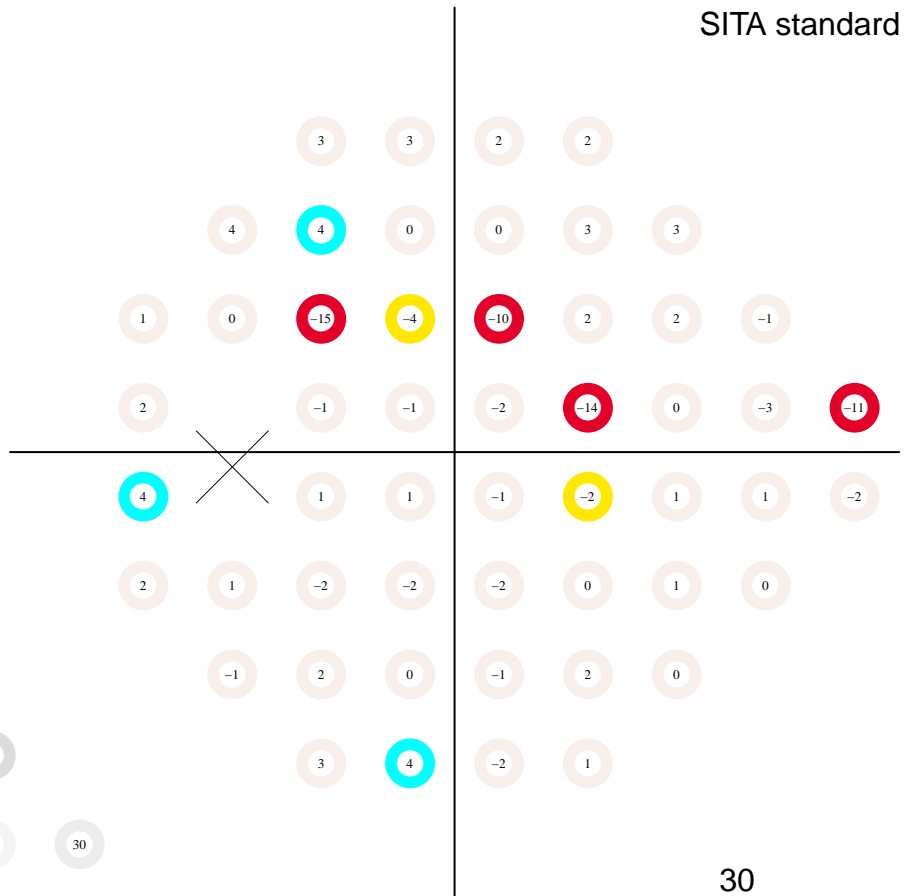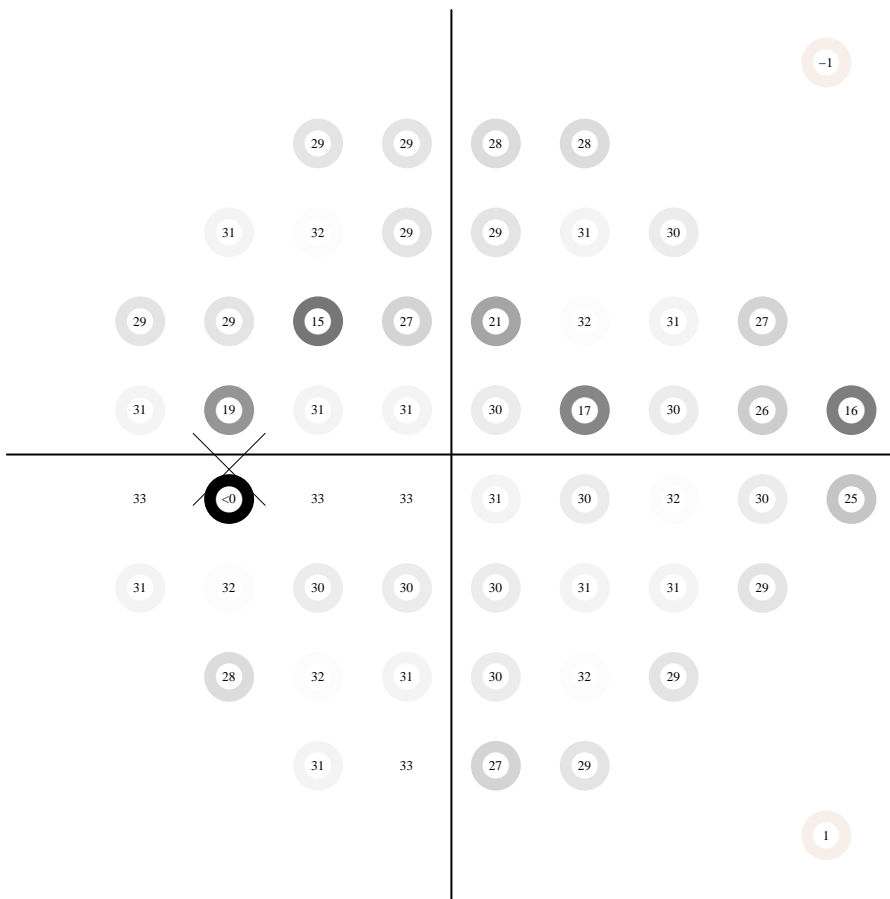

pattern deviation

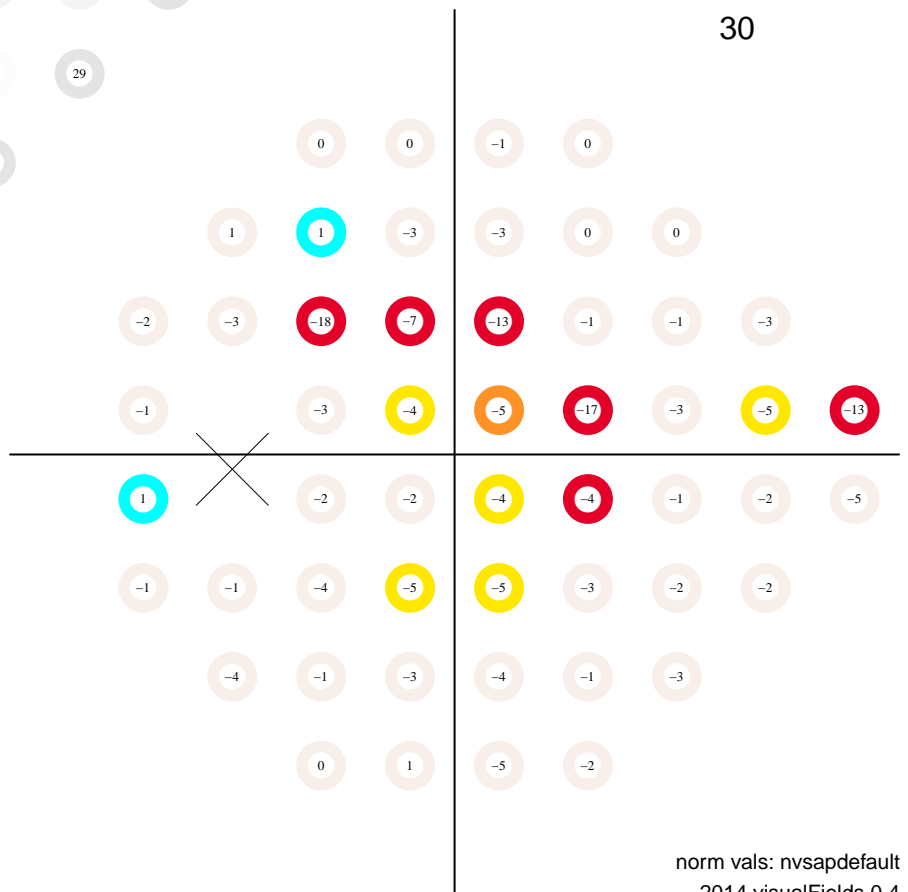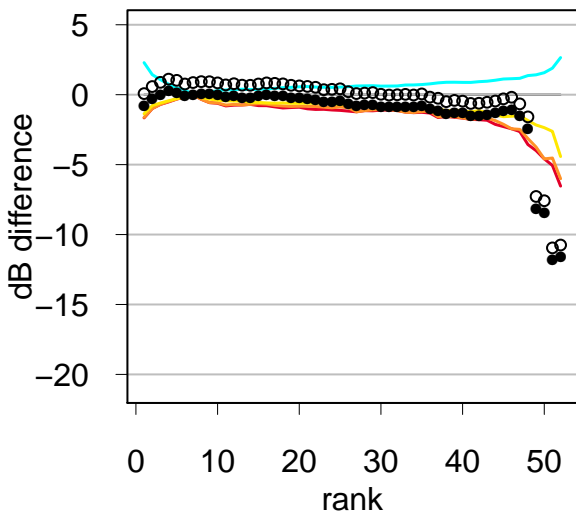

# Static Automated Perimetry. Single field analysis

Subject ID: 1022, age: 67, eye: OS (left)

Date: 04/01/2009 at 9:13:

Duration: 05:11, pause: 00:00

false positives 0.0 %

false negatives 0.0 %

fixation losses 6.7 %

MS 28.8 dB

MD -1.1 dB (p < 95 %)

PSD 3.8 dB (p < 95 %)

VFI 95.2 % (p < 0.5 %)

GH 1.6 dB

total deviation

Central 24-2  
SITA standard

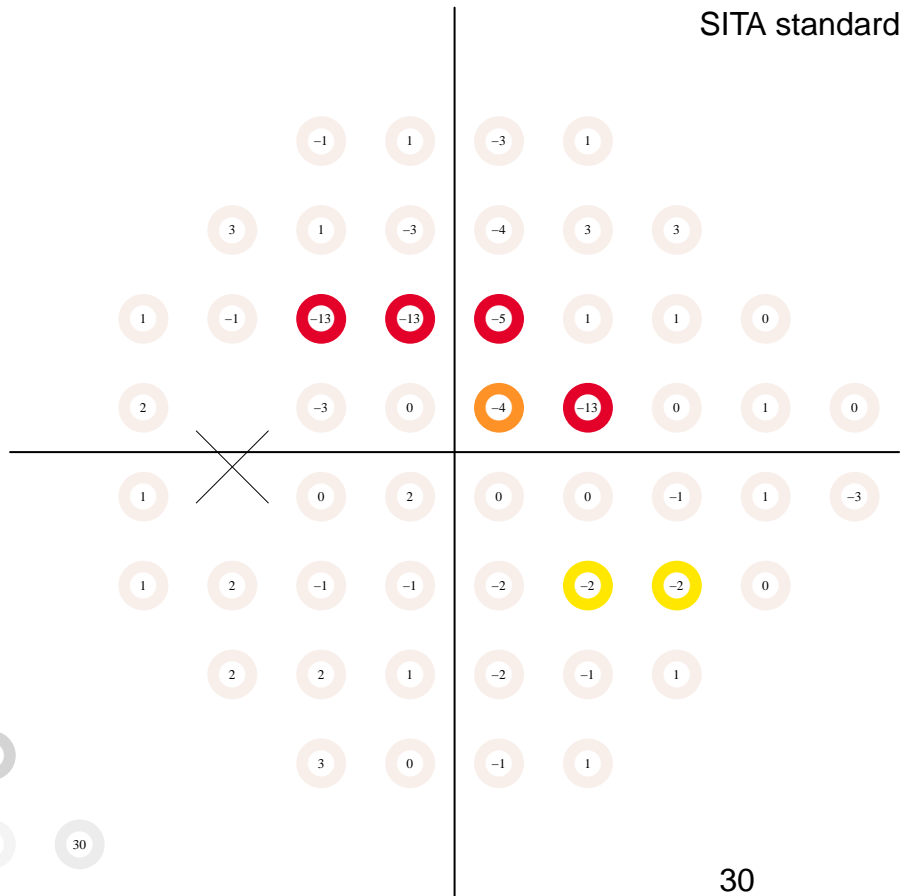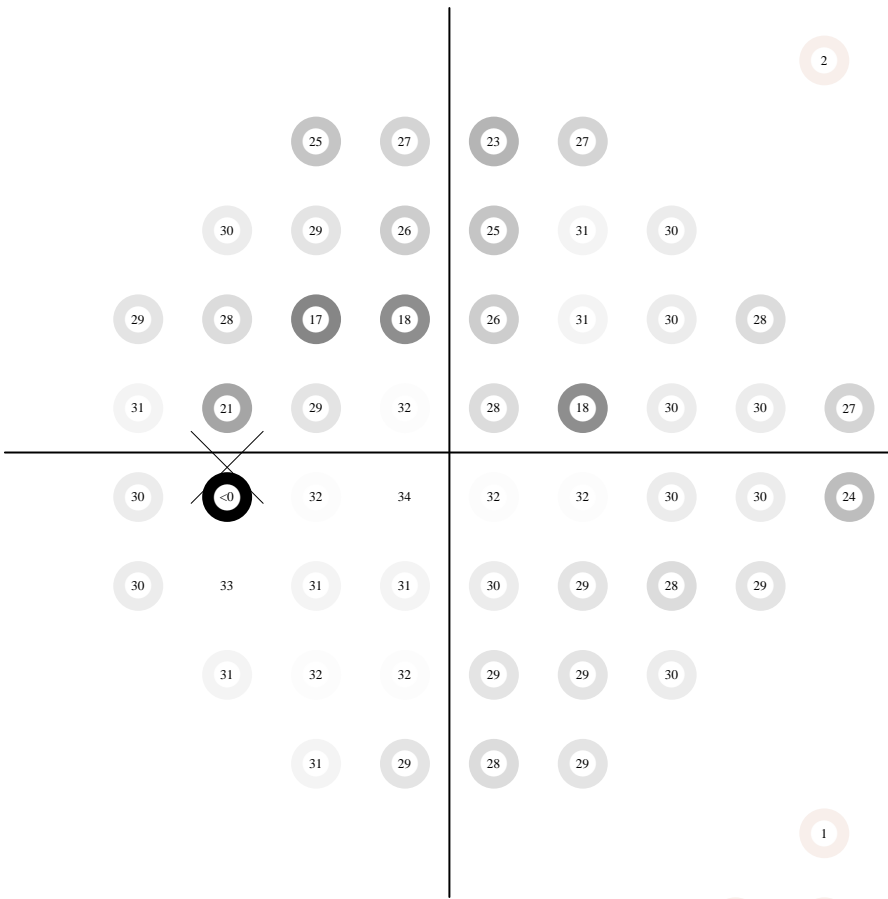

pattern deviation

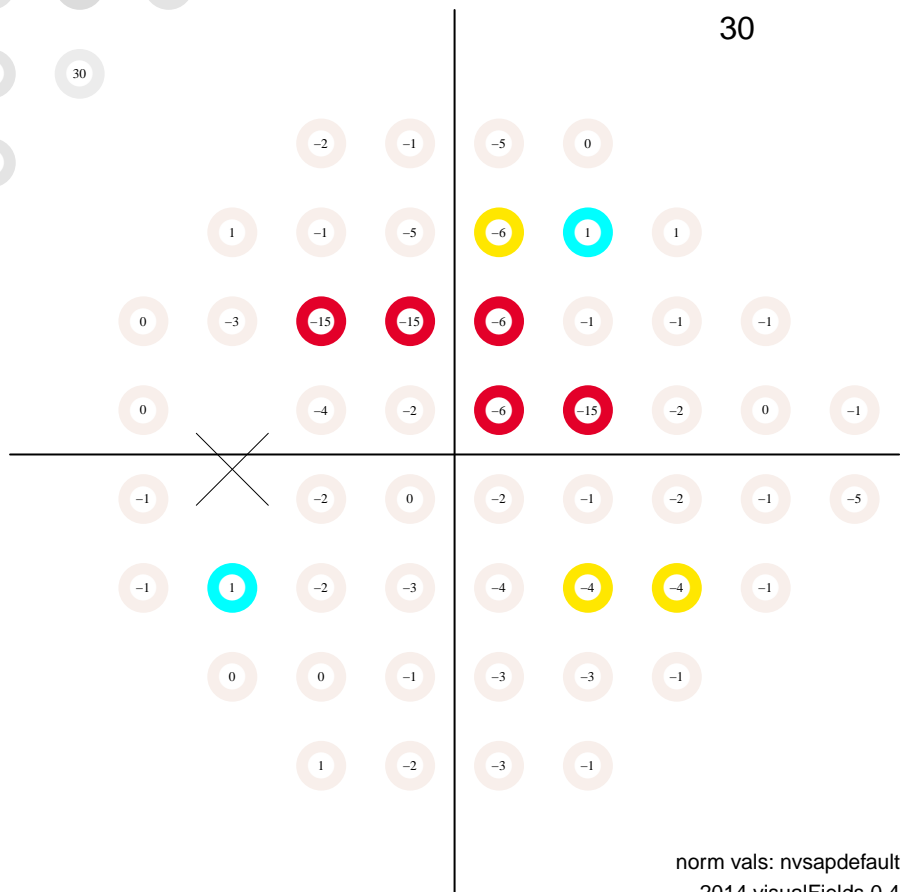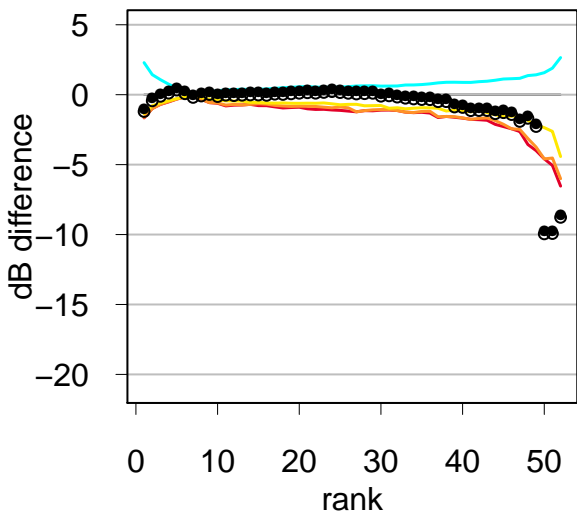

# Static Automated Perimetry. Single field analysis

Subject ID: 1022, age: 67, eye: OS (left)

Date: 04/14/2009 at 8:26:

Duration: 04:33, pause: 00:00

false positives 1.0 %

false negatives 0.0 %

fixation losses 0.0 %

MS 29.8 dB

MD -0.2 dB (p < 95 %)

PSD 2.7 dB (p < 95 %)

VFI 96.6 % (p < 1 %)

GH 2.6 dB

total deviation

Central 24-2  
SITA standard

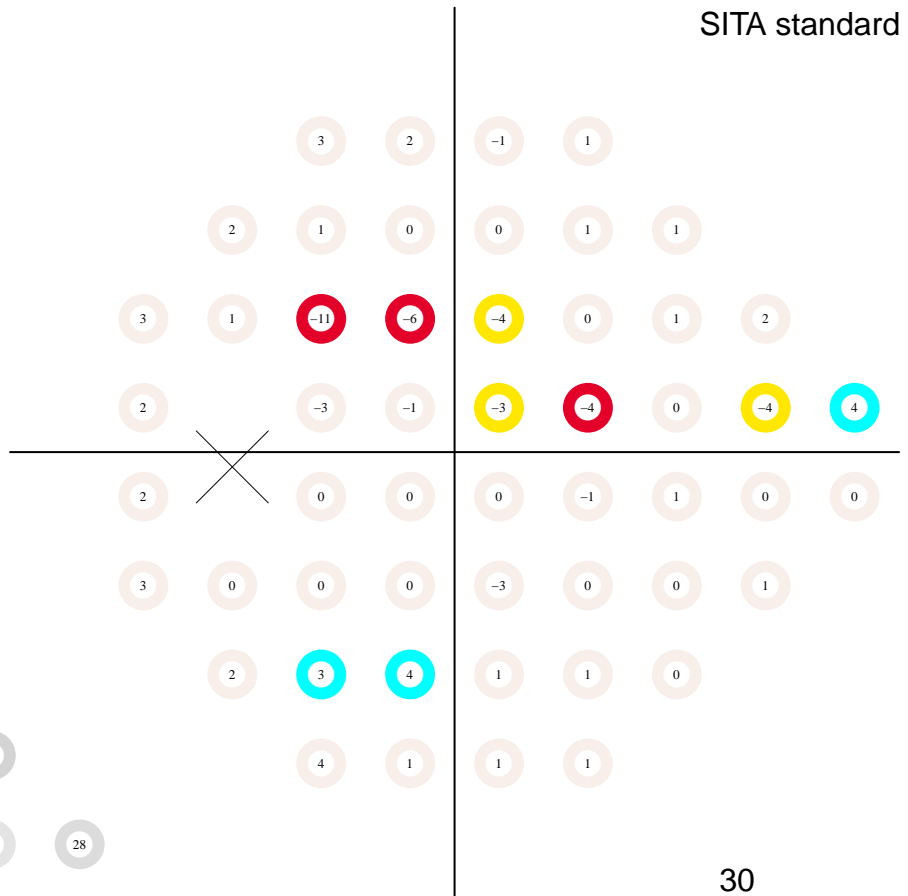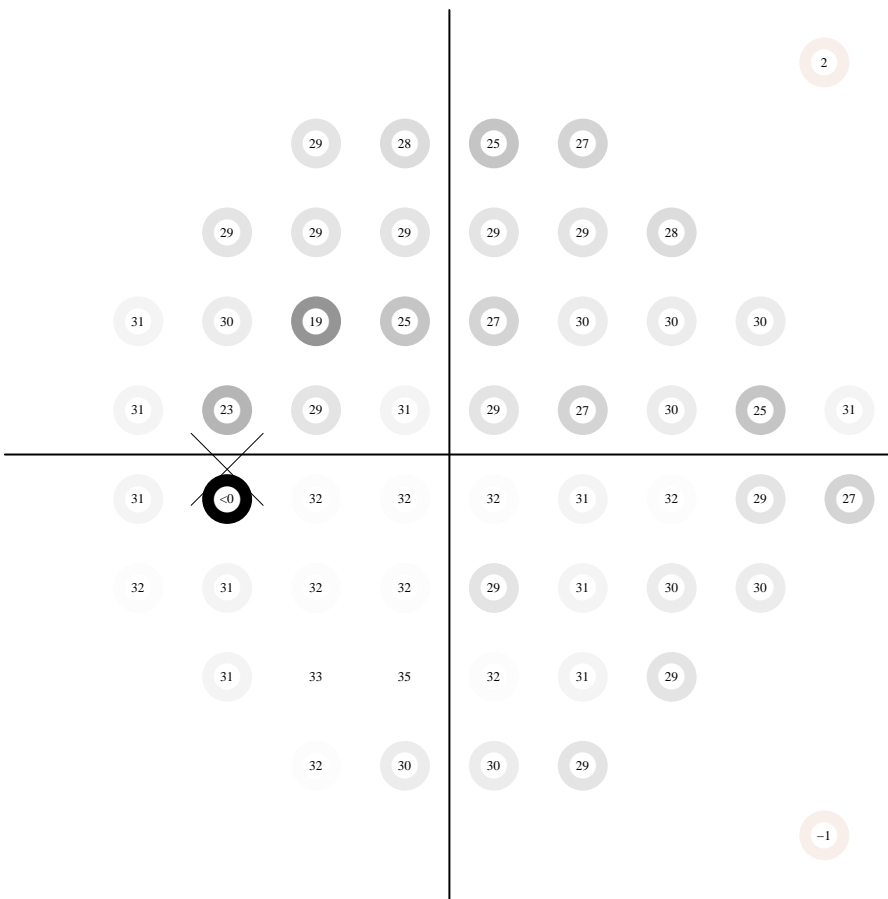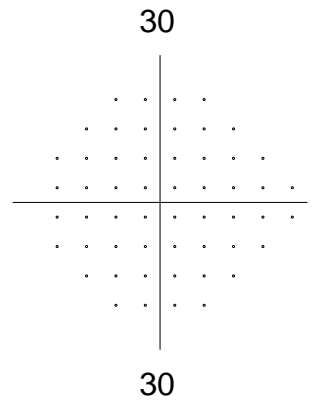

pattern deviation

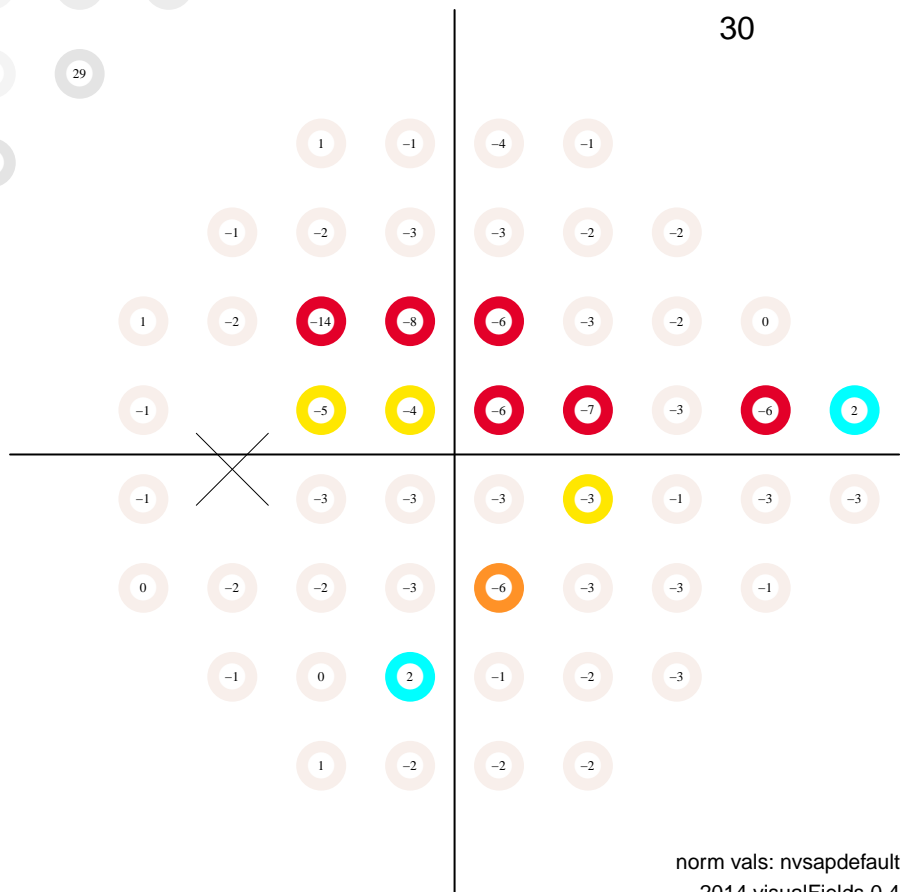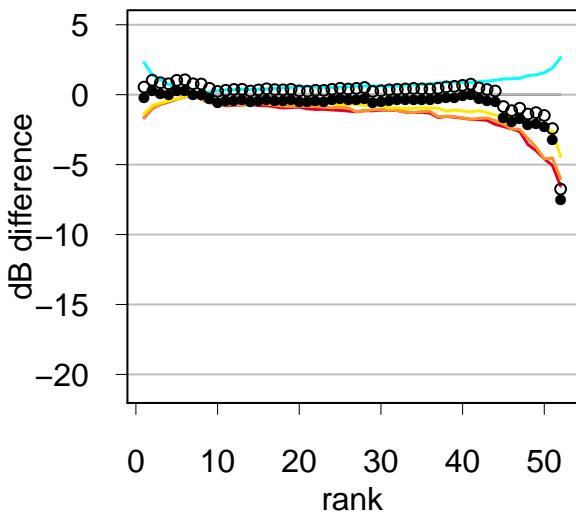

# Static Automated Perimetry. Single field analysis

Subject ID: 1022, age: 68, eye: OS (left)

Date: 10/27/2009 at 9:07:

Duration: 05:09, pause: 00:00

false positives 3.0 %

false negatives 0.0 %

fixation losses 6.7 %

MS 28.8 dB

MD -1.1 dB (p < 95 %)

PSD 5.4 dB (p < 95 %)

VFI 93.1 % (p < 0.5 %)

GH 2.4 dB

total deviation

Central 24-2  
SITA standard

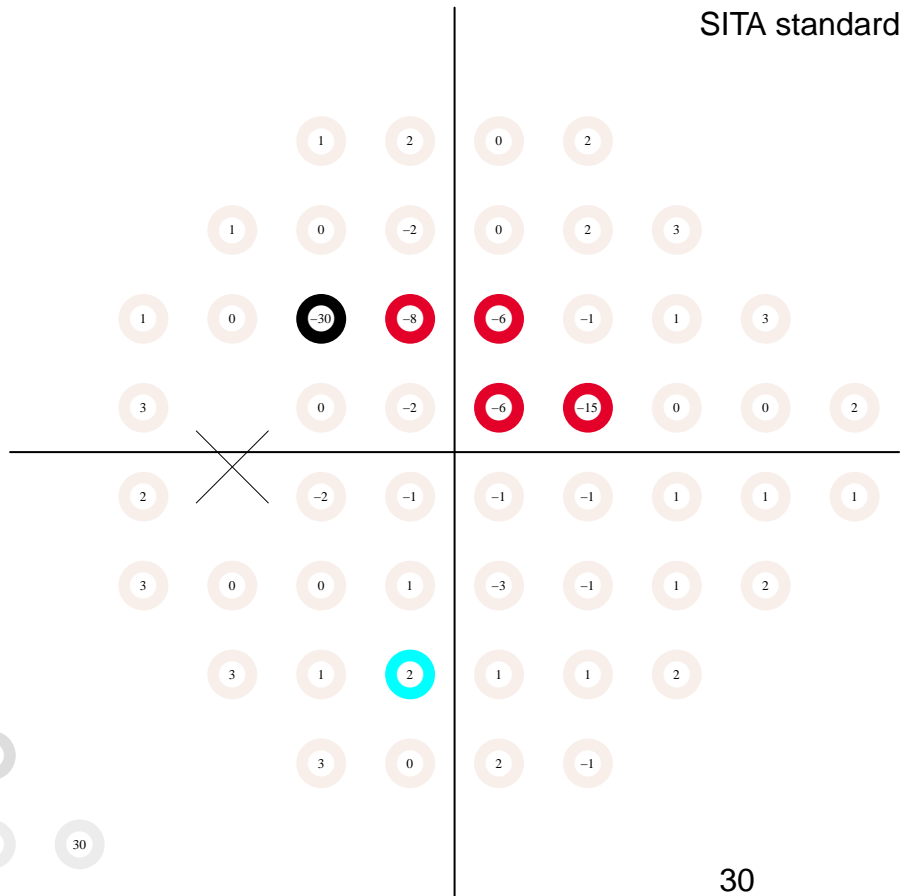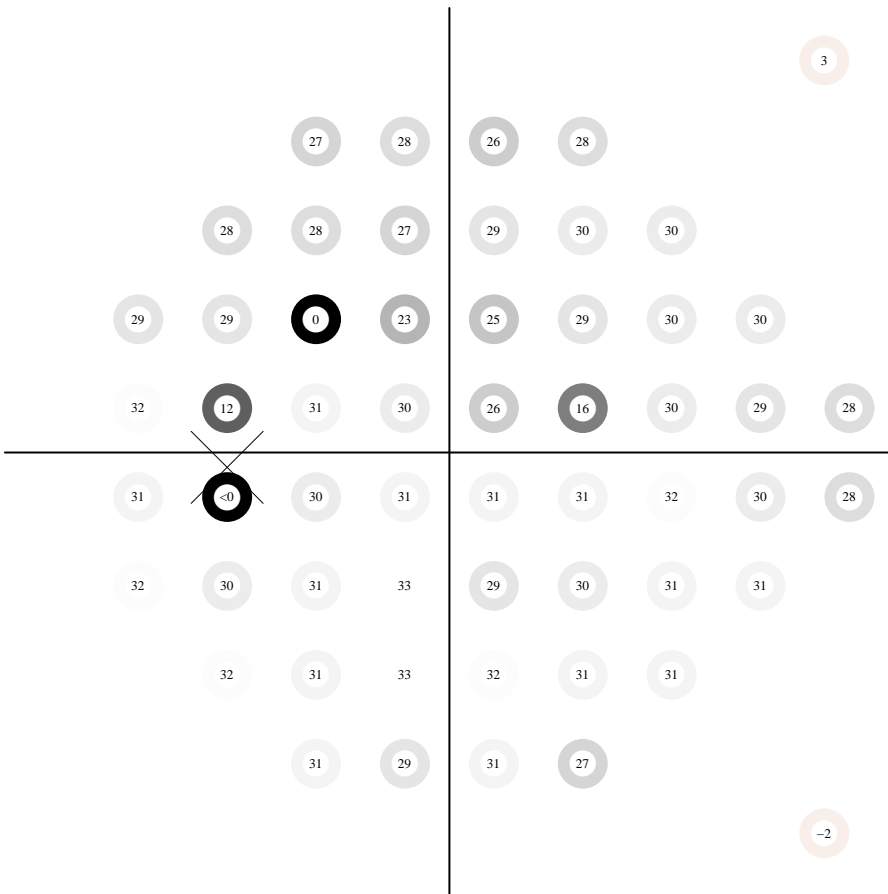

pattern deviation

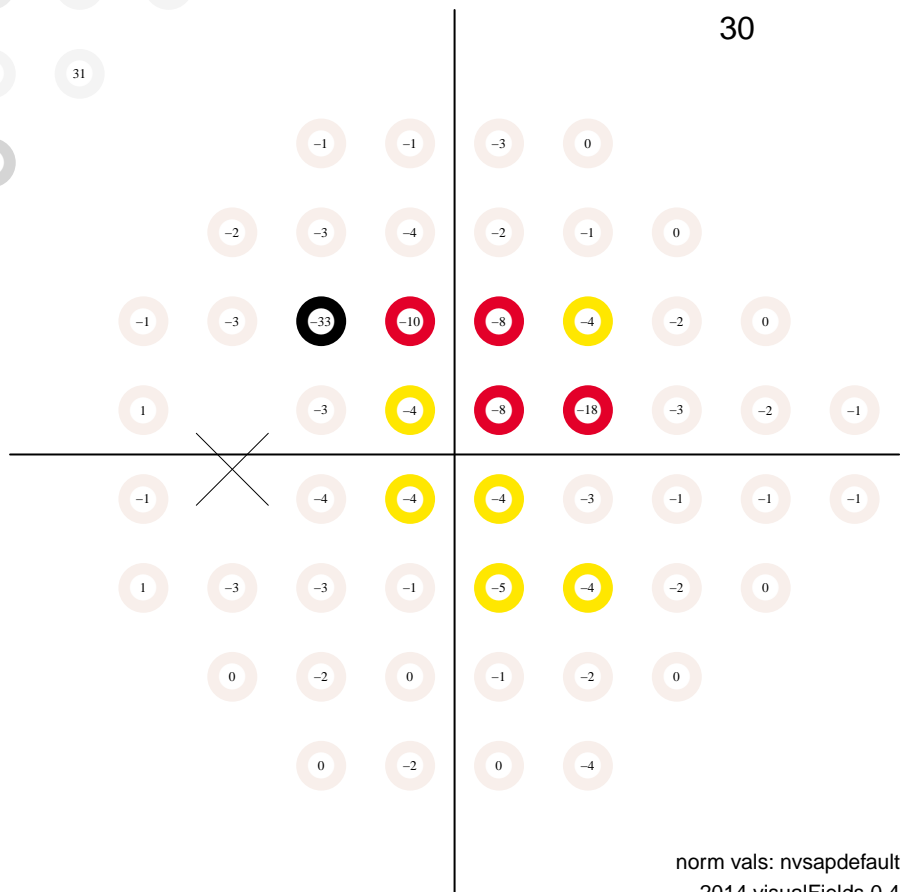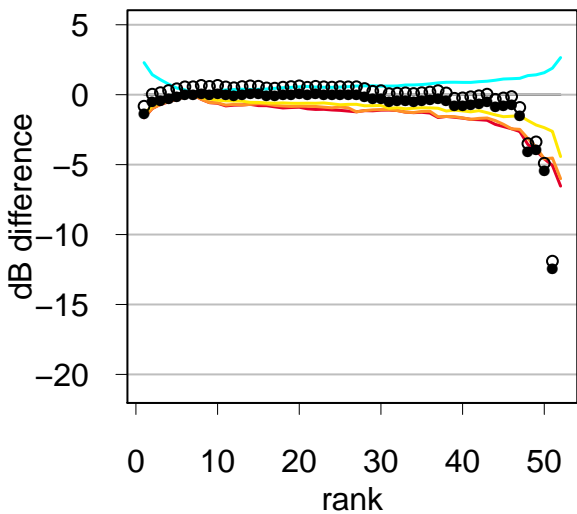

# Static Automated Perimetry. Single field analysis

Subject ID: 1022, age: 68, eye: OS (left)

Date: 04/30/2010 at 9:33:

Duration: 05:41, pause: 00:00

false positives 1.0 %

false negatives 12.0 %

fixation losses 0.0 %

MS 27.3 dB

MD -2.6 dB (p < 5 %)

PSD 7.0 dB (p < 5 %)

VFI 92.0 % (p < 0.5 %)

GH 1.2 dB

total deviation

Central 24-2  
SITA standard

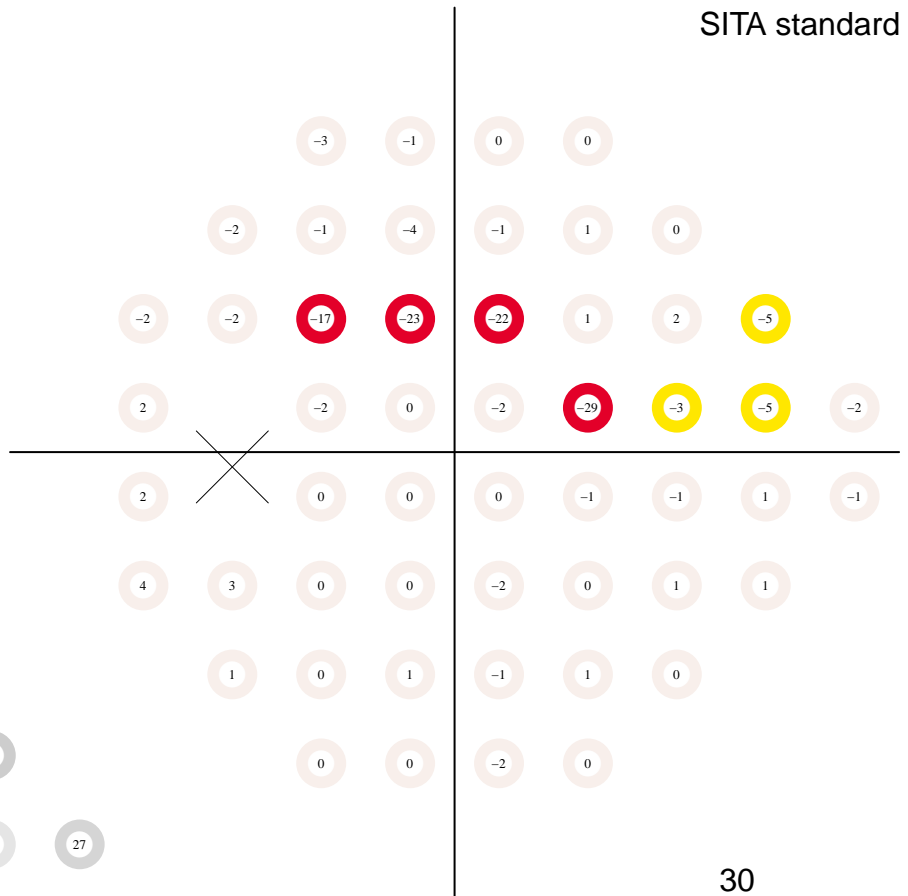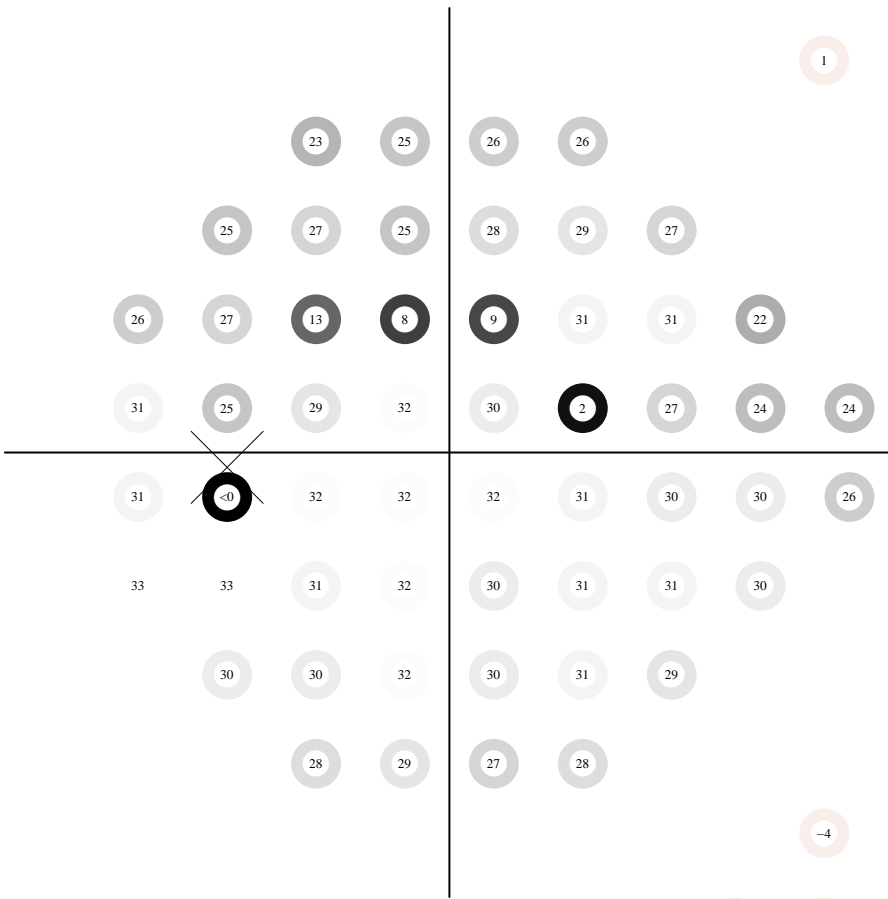

pattern deviation

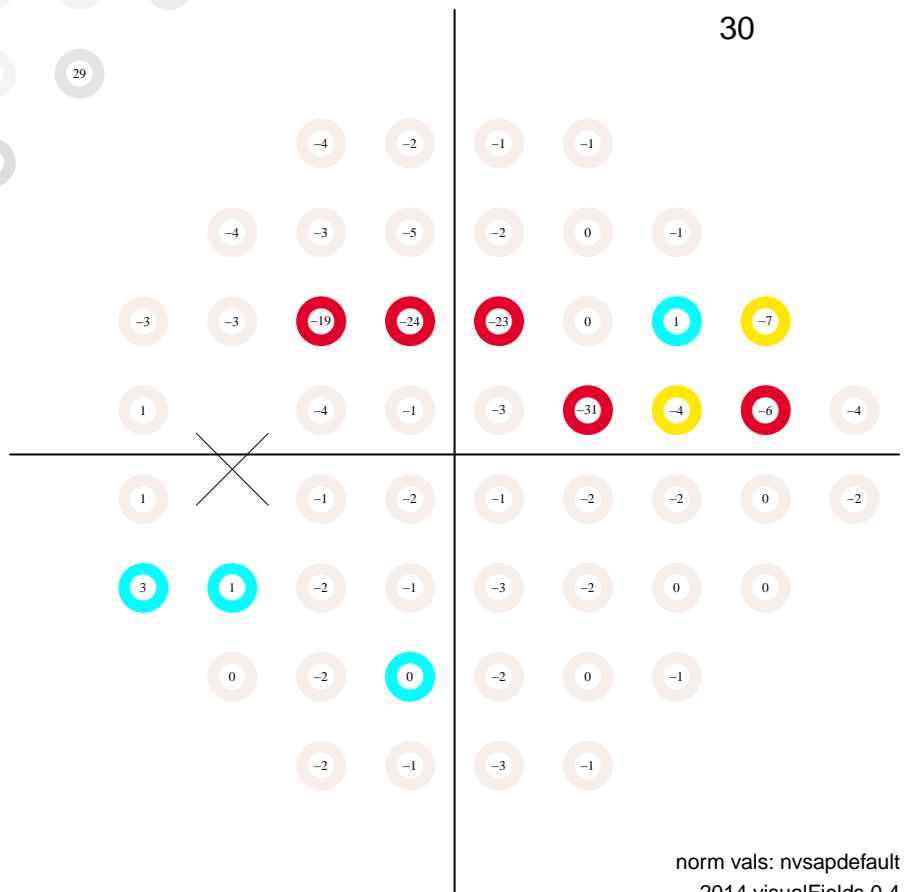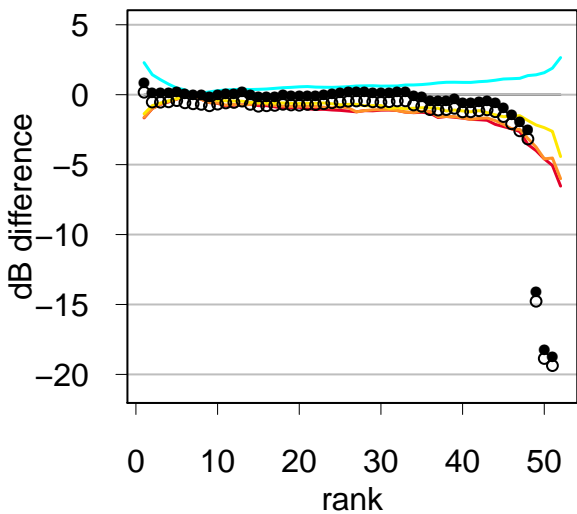

# Static Automated Perimetry. Single field analysis

Subject ID: 1022, age: 68, eye: OS (left)

Date: 05/28/2010 at 10:12

Duration: 05:45, pause: 00:00

false positives 5.0 %

false negatives 6.0 %

fixation losses 11.1 %

MS 27.3 dB

MD -2.6 dB (p < 5 %)

PSD 6.7 dB (p < 5 %)

VFI 90.2 % (p < 0.5 %)

GH 1.8 dB

total deviation

Central 24-2  
SITA standard

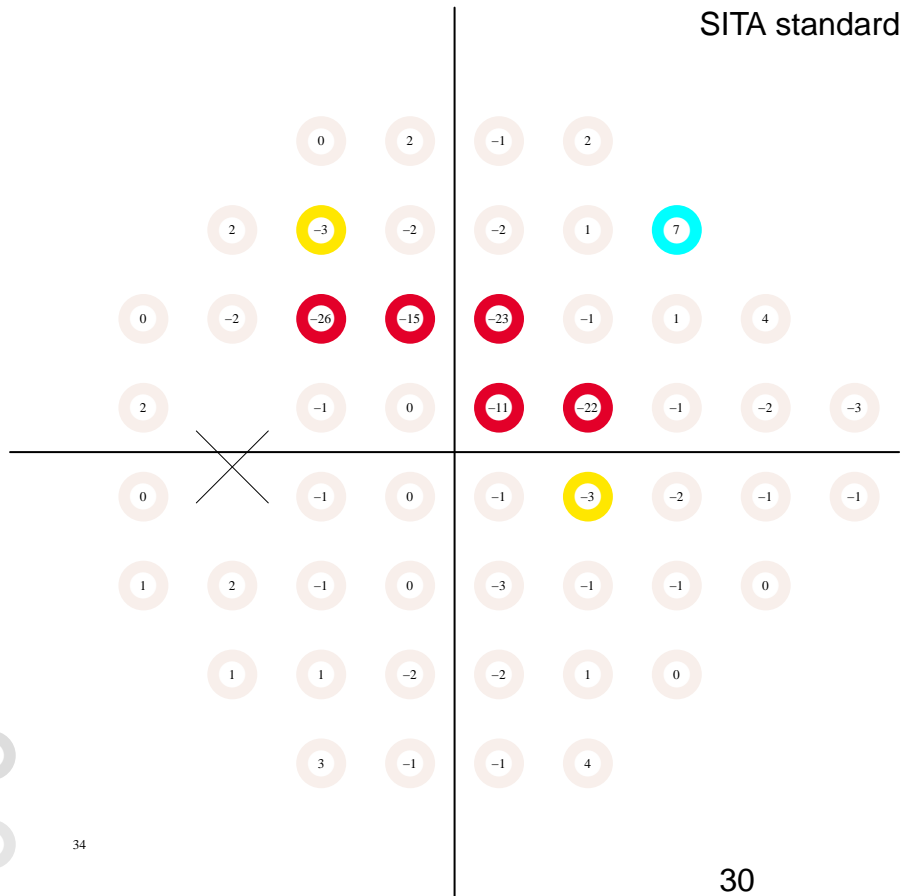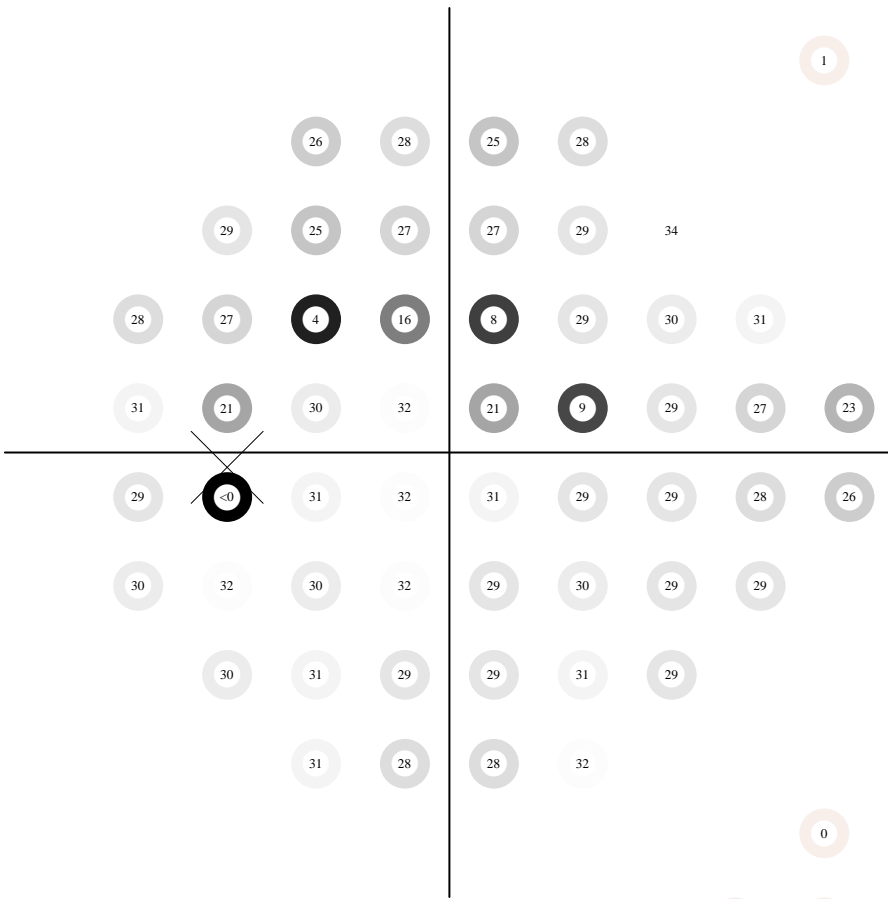

pattern deviation

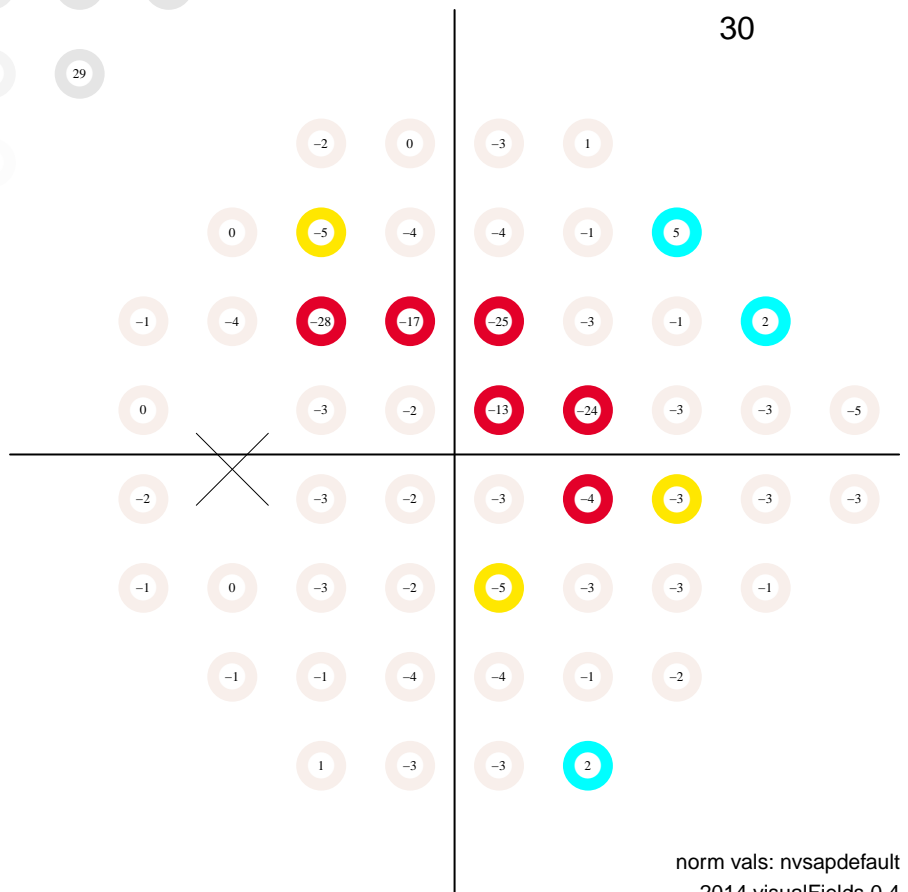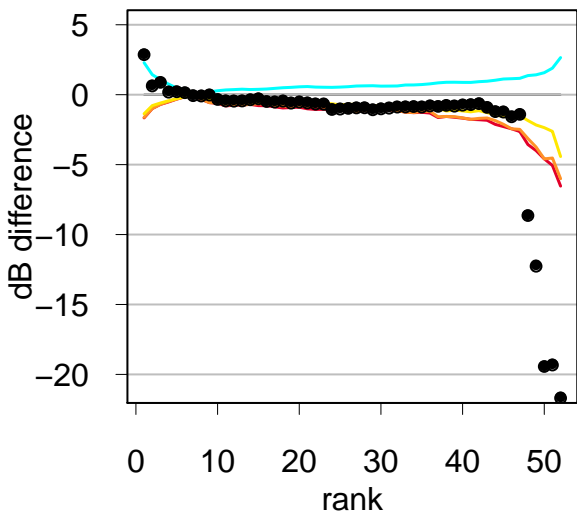

# Static Automated Perimetry. Single field analysis

Subject ID: 1022, age: 69, eye: OS (left)

Date: 05/20/2011 at 7:26:

Duration: 06:01, pause: 00:00

false positives 0.0 %

false negatives 7.0 %

fixation losses 0.0 %

MS 26.3 dB

MD -3.5 dB (p < 0.5 %)

PSD 7.8 dB (p < 0.5 %)

VFI 88.3 % (p < 0.5 %)

GH 0.7 dB

total deviation

Central 24-2  
SITA standard

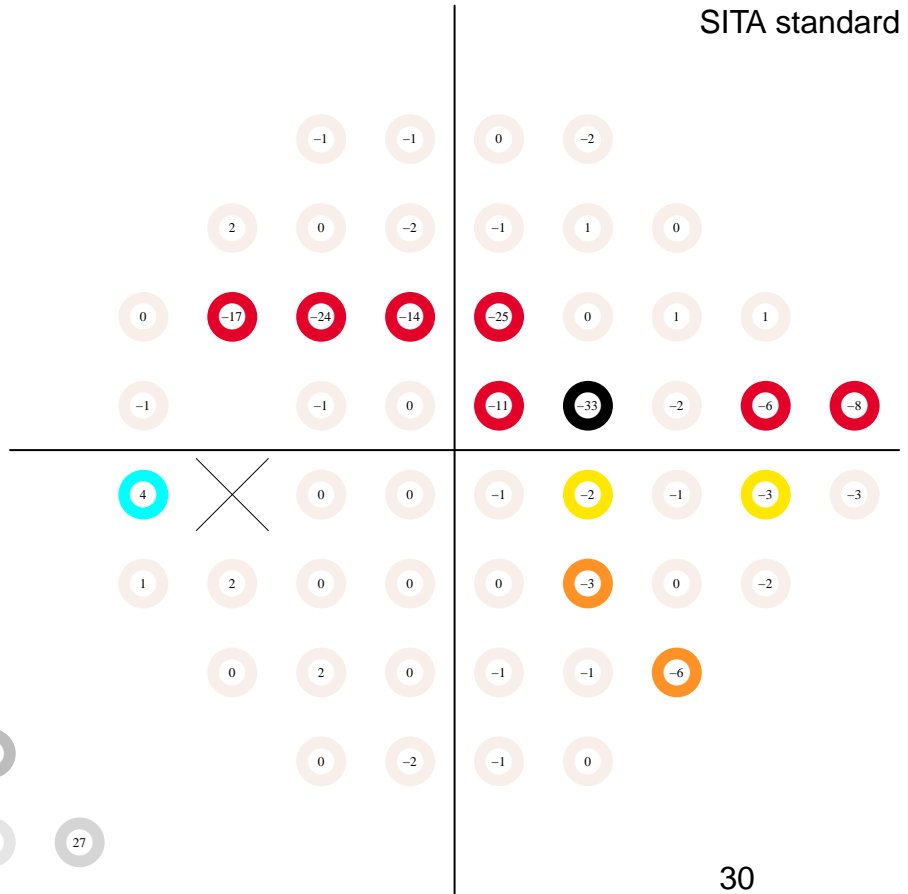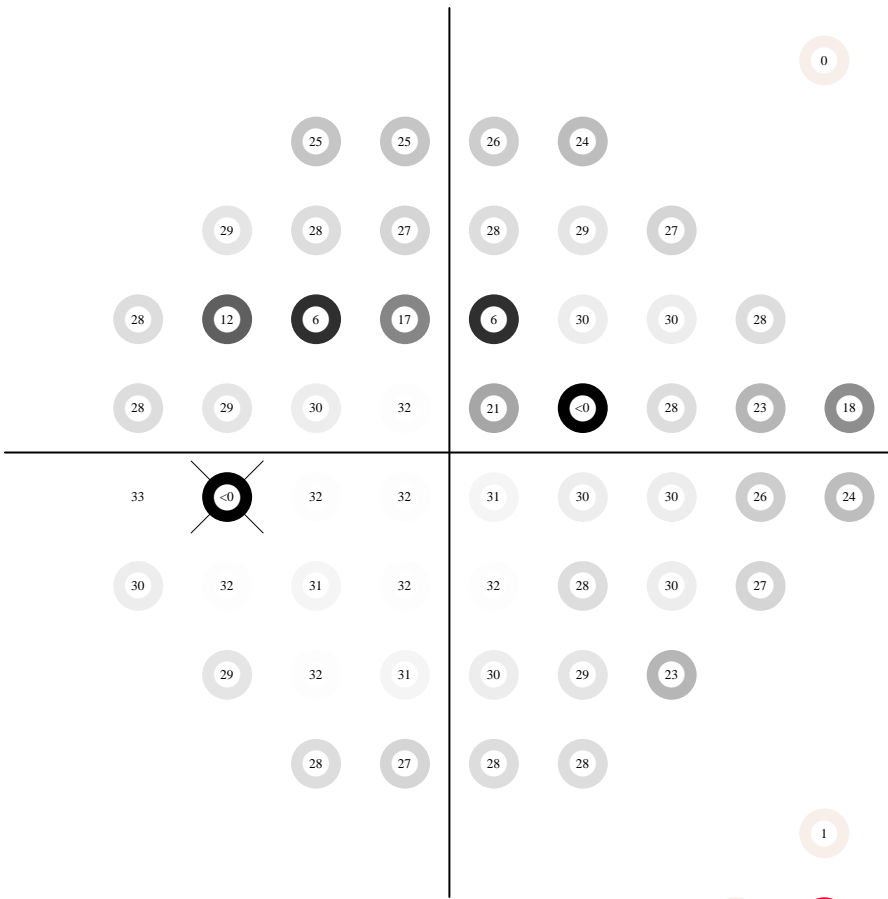

pattern deviation

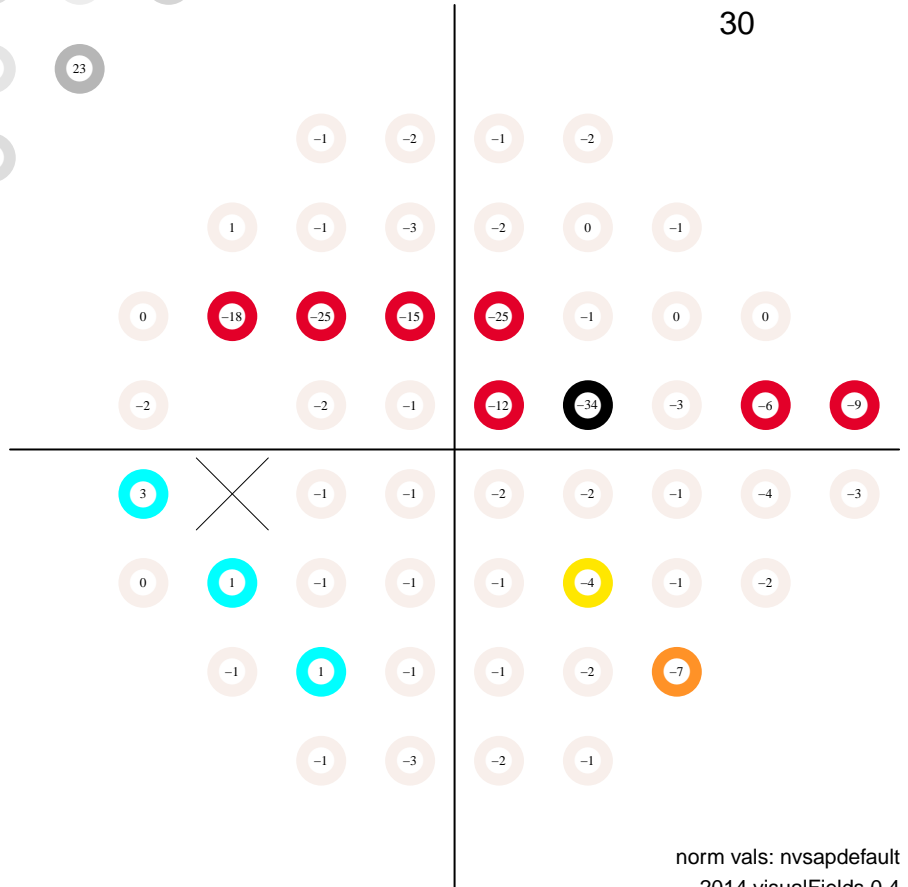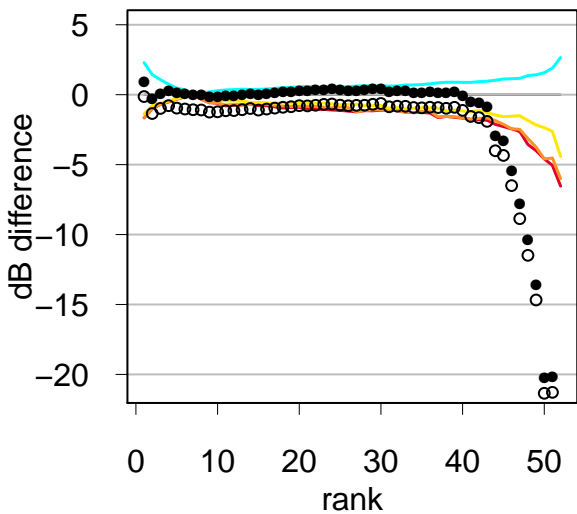



# Static Automated Perimetry. Single field analysis

Subject ID: 1022, age: 70, eye: OS (left)

Date: 11/15/2011 at 10:49

Duration: 05:51, pause: 00:00

false positives 1.0 %

false negatives 10.0 %

fixation losses 6.7 %

MS 26.7 dB

MD -3.0 dB (p < 5 %)

PSD 8.2 dB (p < 5 %)

VFI 90.3 % (p < 0.5 %)

GH 0.9 dB

total deviation

Central 24-2  
SITA standard

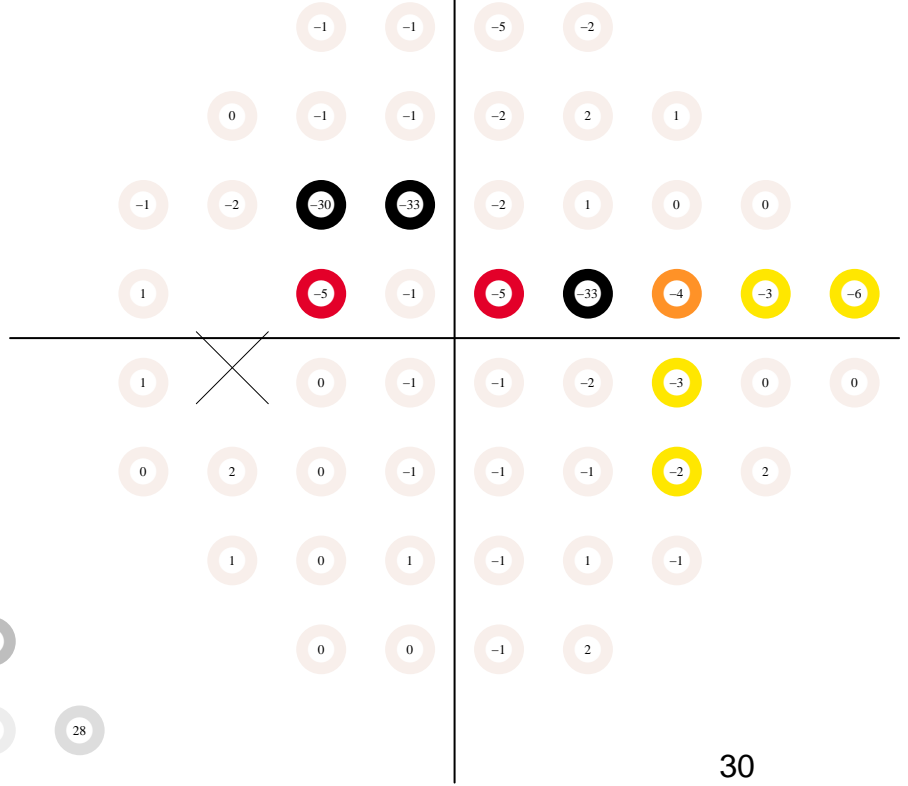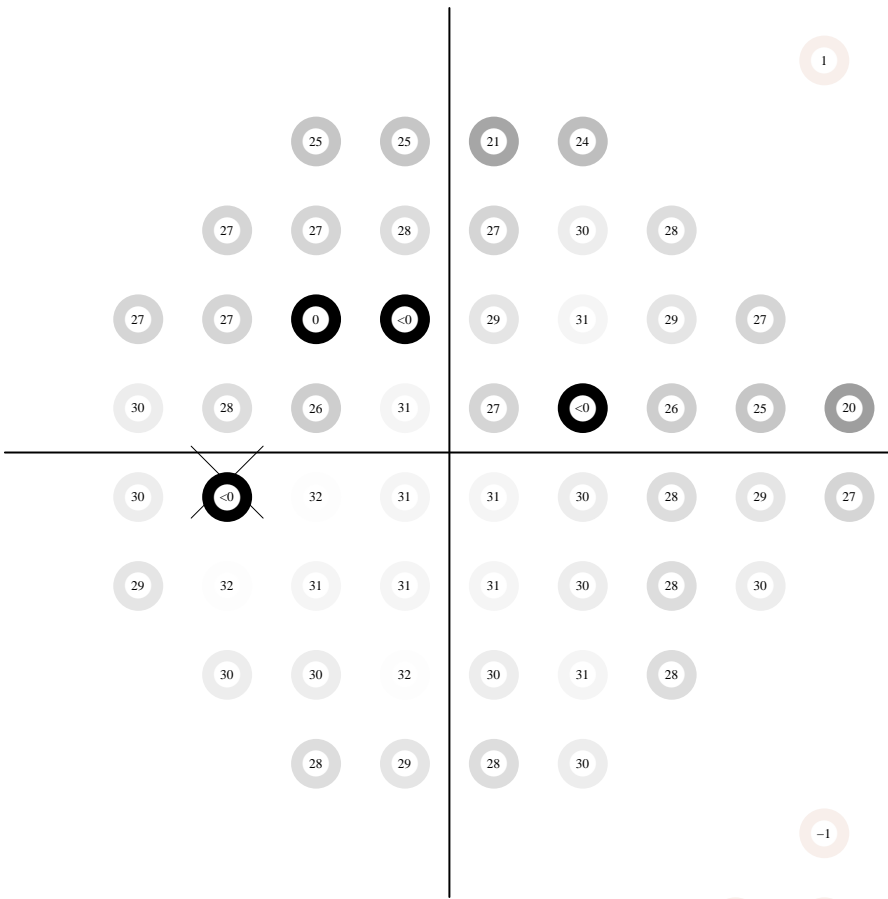

pattern deviation

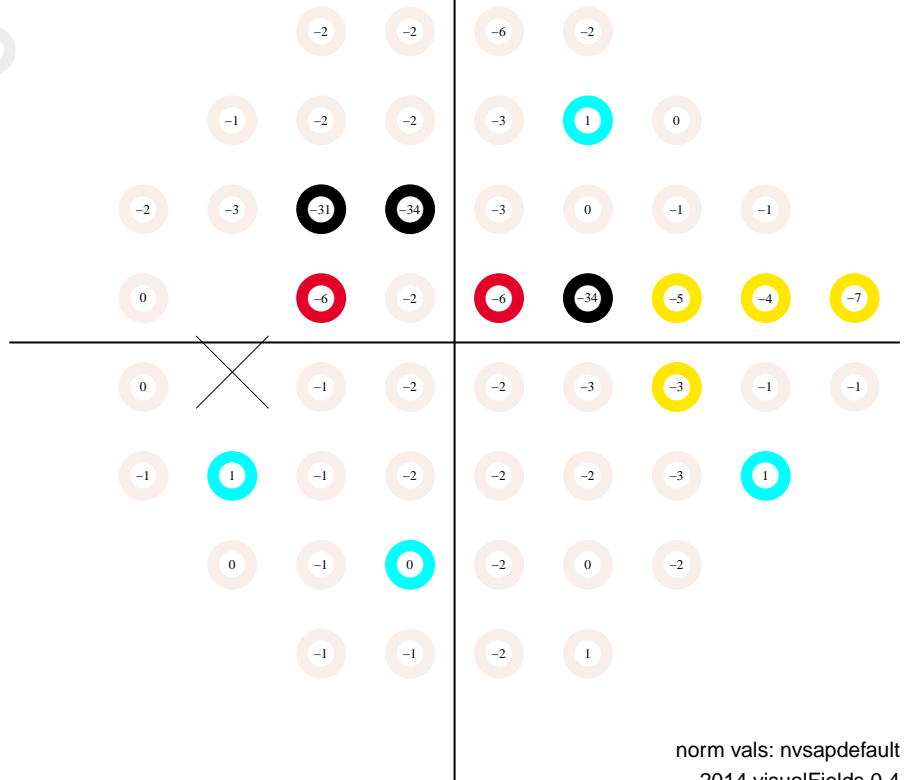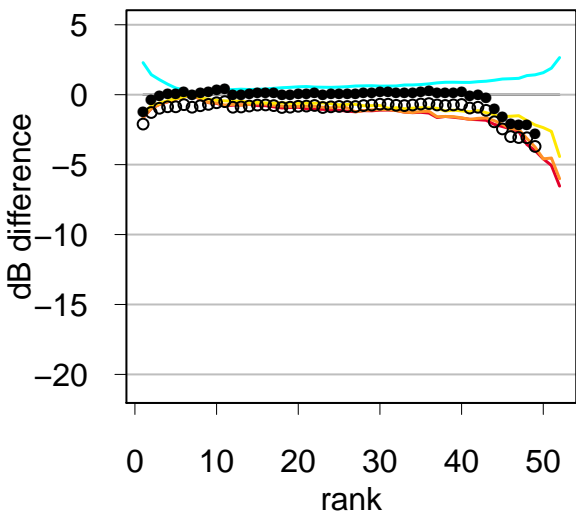

# Static Automated Perimetry. Single field analysis

Subject ID: 1022, age: 70, eye: OS (left)

Date: 02/23/2012 at 9:43:

Duration: 05:33, pause: 00:00

false positives 0.0 %

false negatives 4.0 %

fixation losses 0.0 %

MS 27.3 dB

MD -2.4 dB (p < 95 %)

PSD 8.1 dB (p < 95 %)

VFI 90.7 % (p < 0.5 %)

GH 1.7 dB

total deviation

Central 24-2  
SITA standard

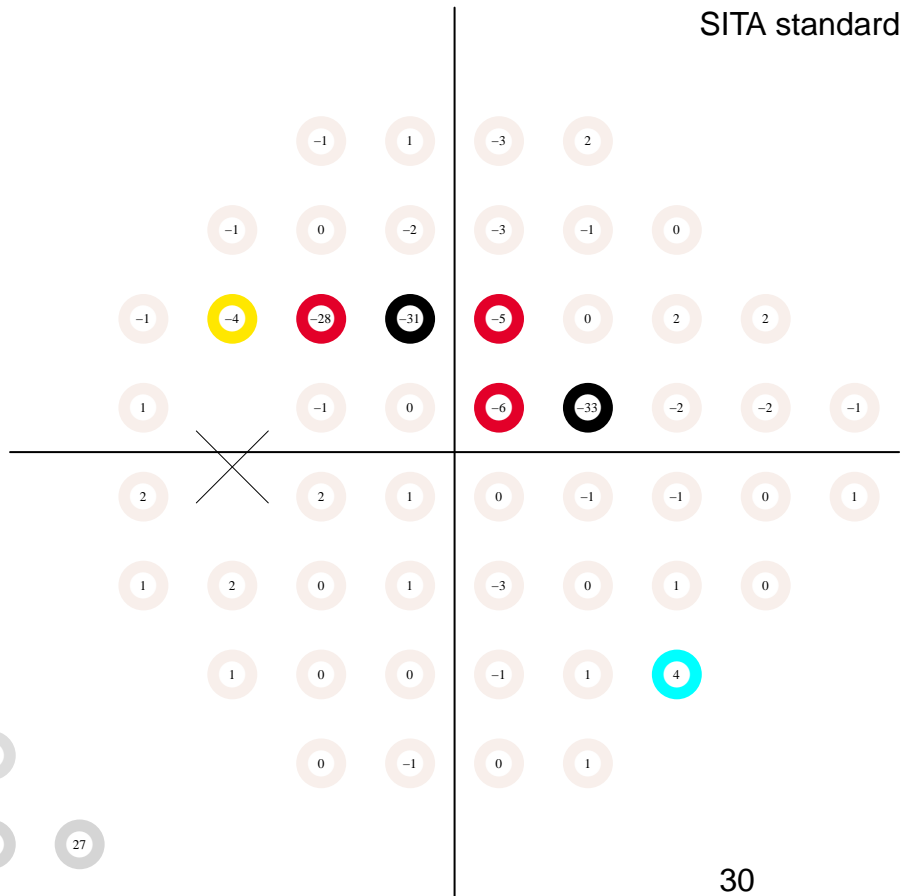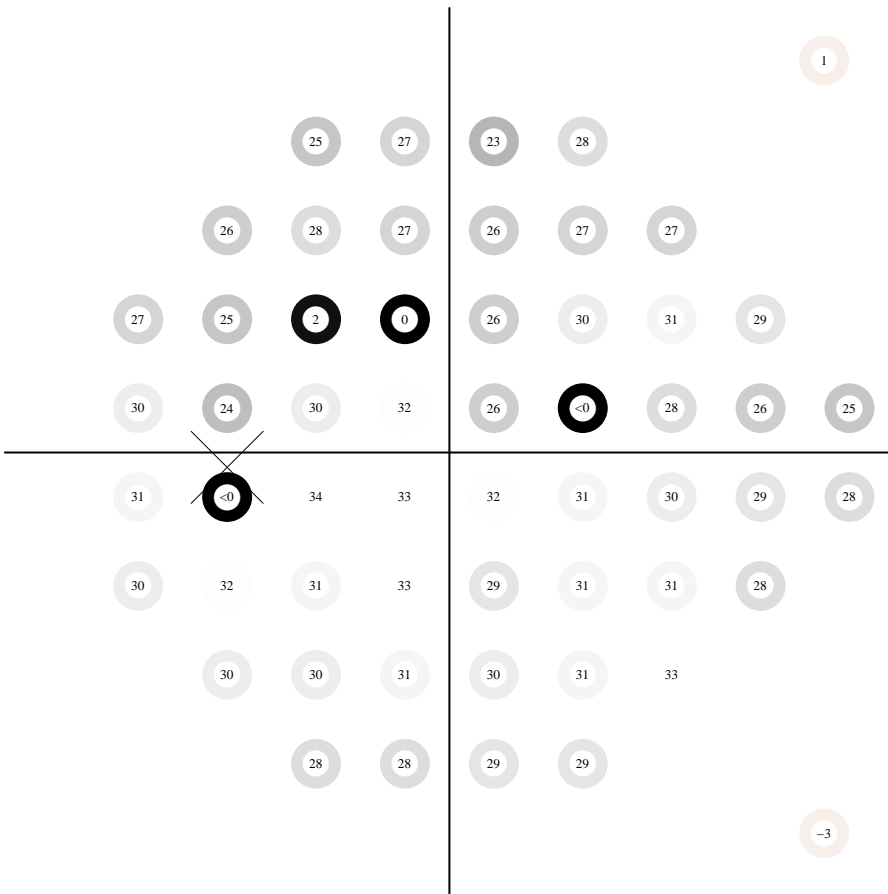

pattern deviation

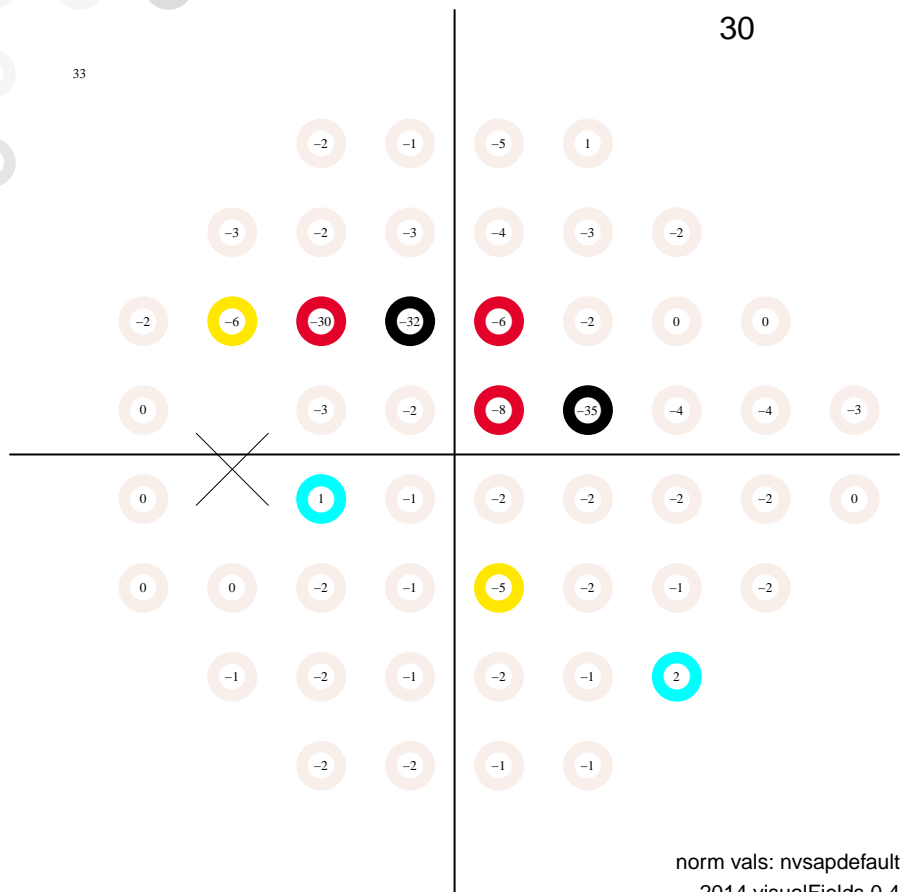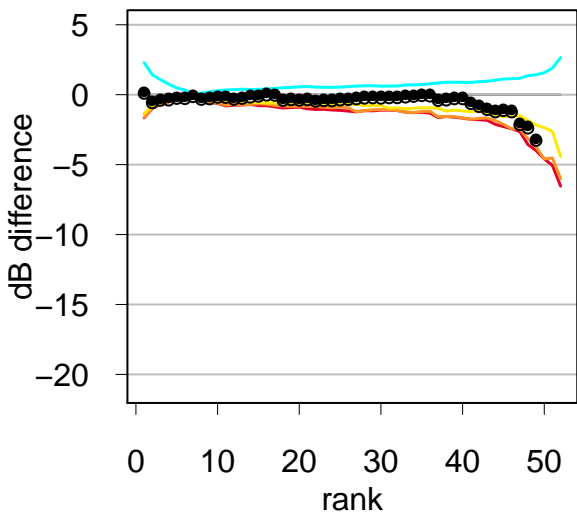

# Static Automated Perimetry. Single field analysis

Subject ID: 1022, age: 70, eye: OS (left)

Date: 05/10/2012 at 7:27:

Duration: 05:35, pause: 00:00

false positives 2.0 %

false negatives 0.0 %

fixation losses 0.0 %

MS 28.0 dB

MD -1.7 dB (p < 95 %)

PSD 7.0 dB (p < 95 %)

VFI 92.1 % (p < 0.5 %)

GH 2.3 dB

total deviation

Central 24-2  
SITA standard

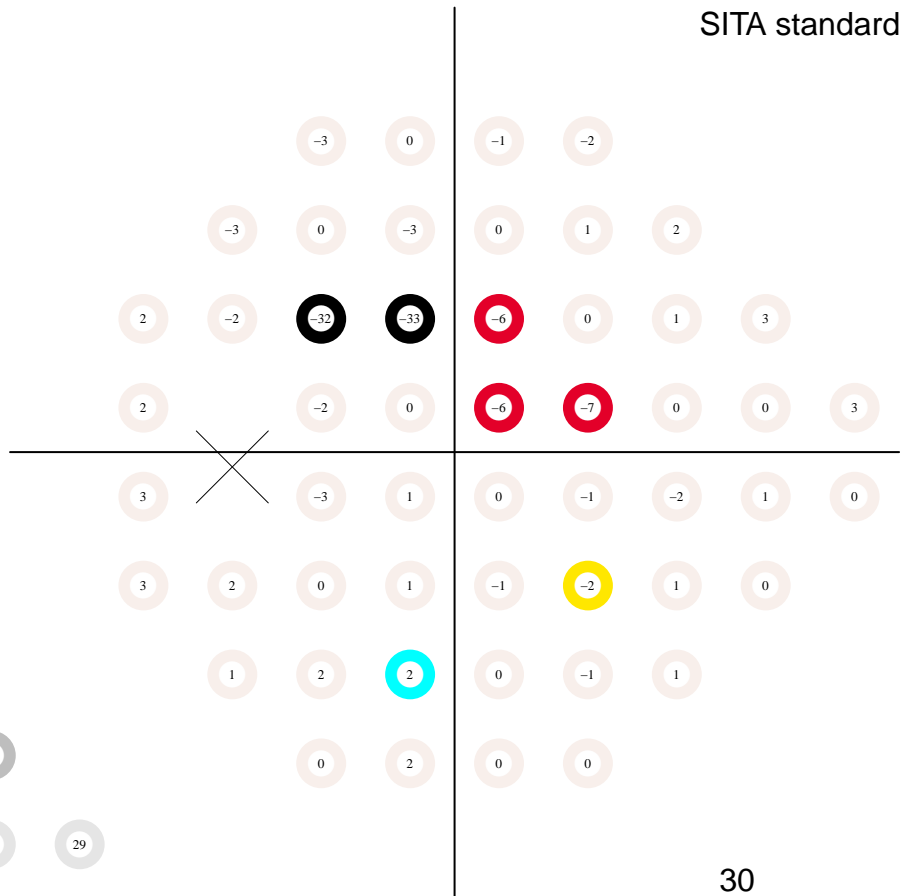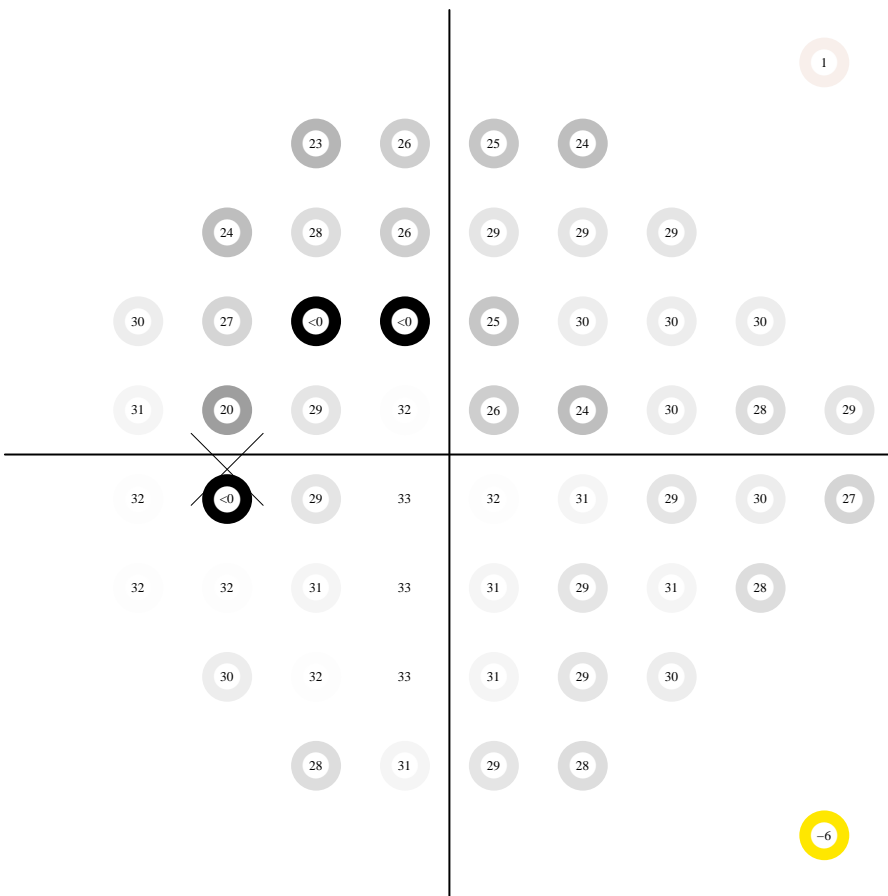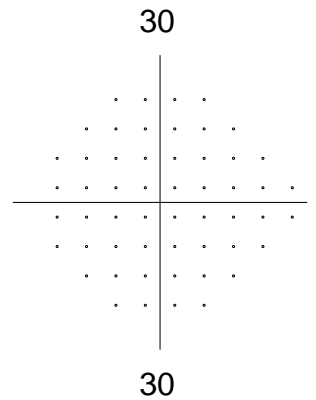

pattern deviation

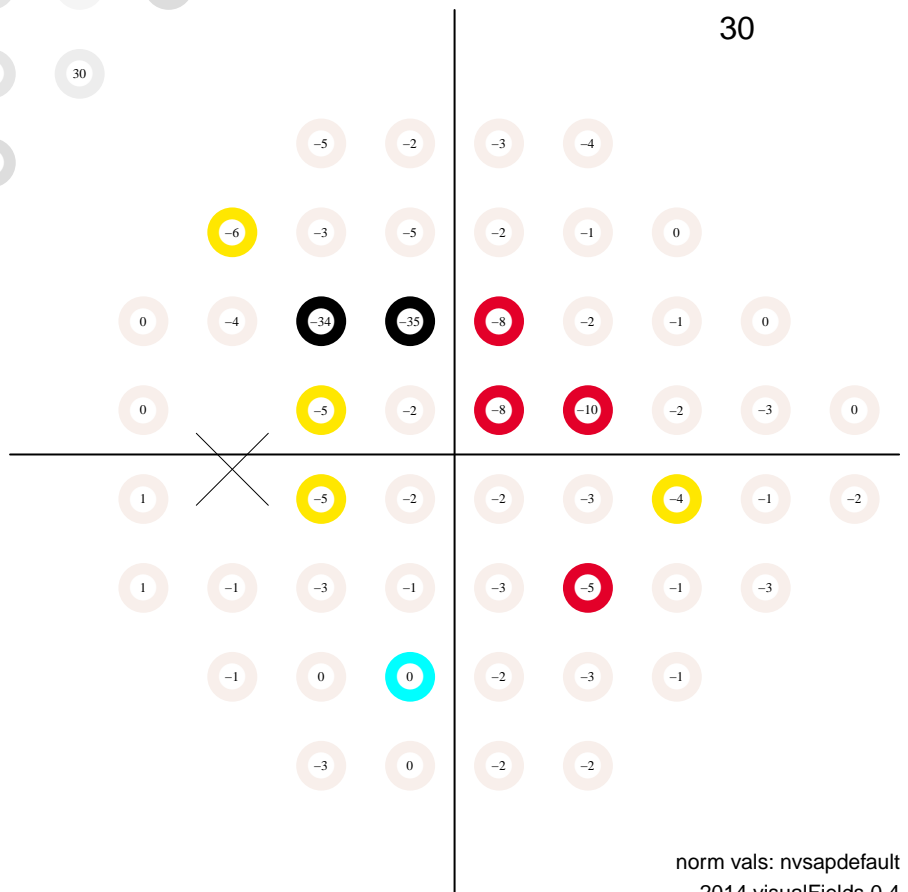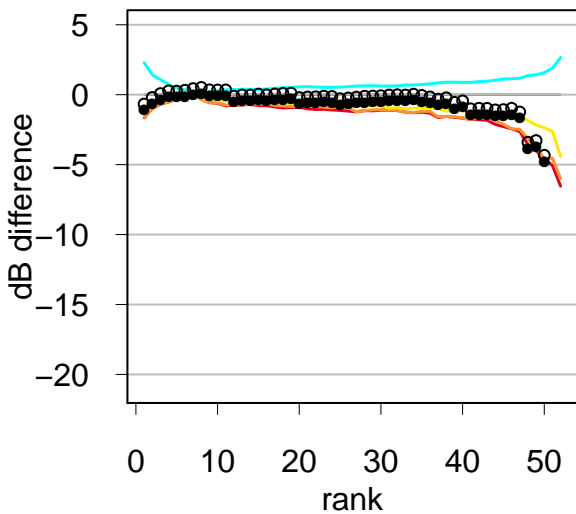

# Static Automated Perimetry. Single field analysis

Subject ID: 1022, age: 71, eye: OS (left)

Date: 09/18/2012 at 9:49:

Duration: 05:20, pause: 00:00

false positives 0.0 %

false negatives 4.0 %

fixation losses 12.5 %

MS 28.0 dB

MD -1.7 dB (p < 95 %)

PSD 6.0 dB (p < 95 %)

VFI 90.8 % (p < 0.5 %)

GH 2.7 dB

total deviation

Central 24-2  
SITA standard

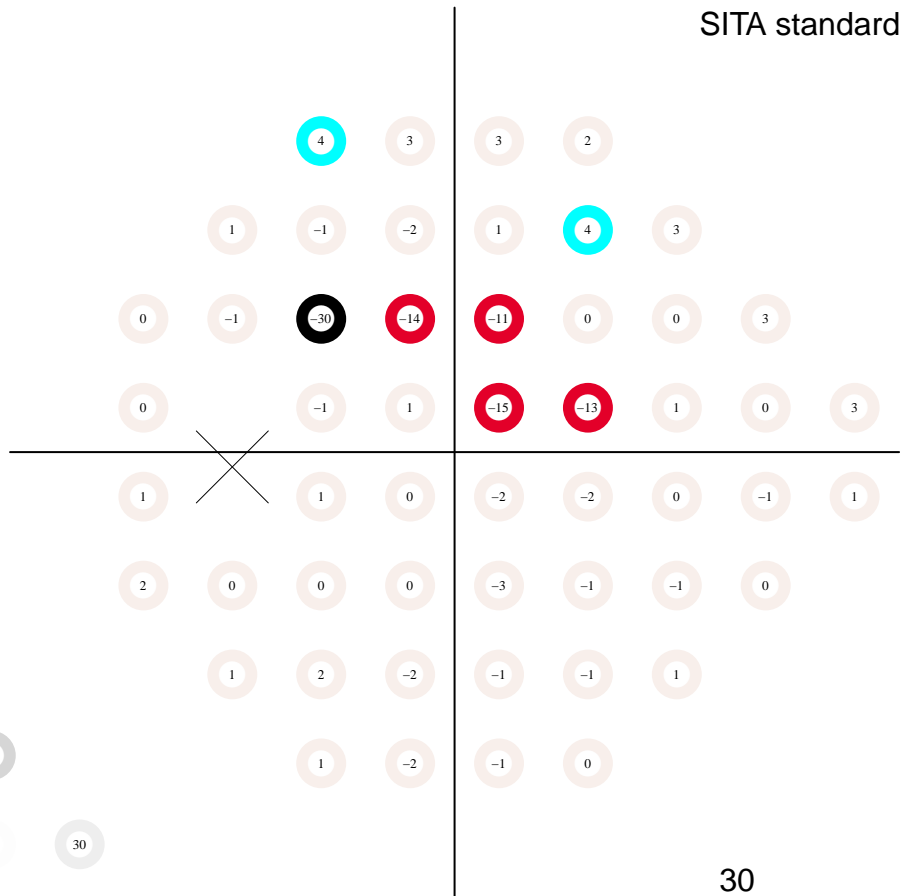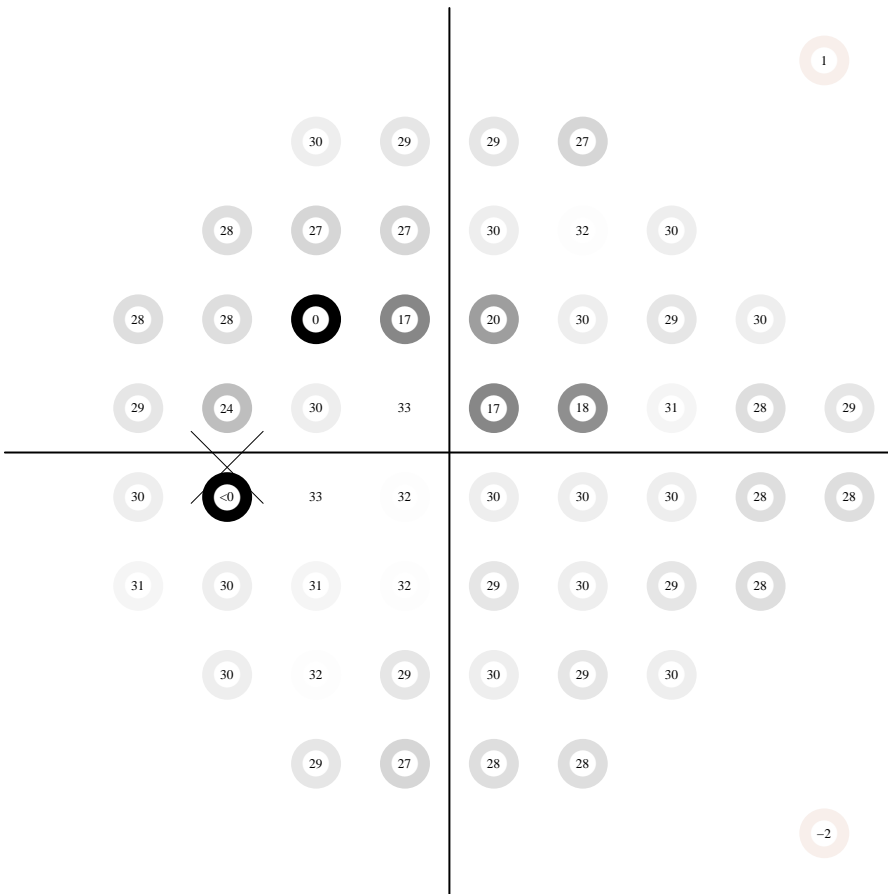

pattern deviation

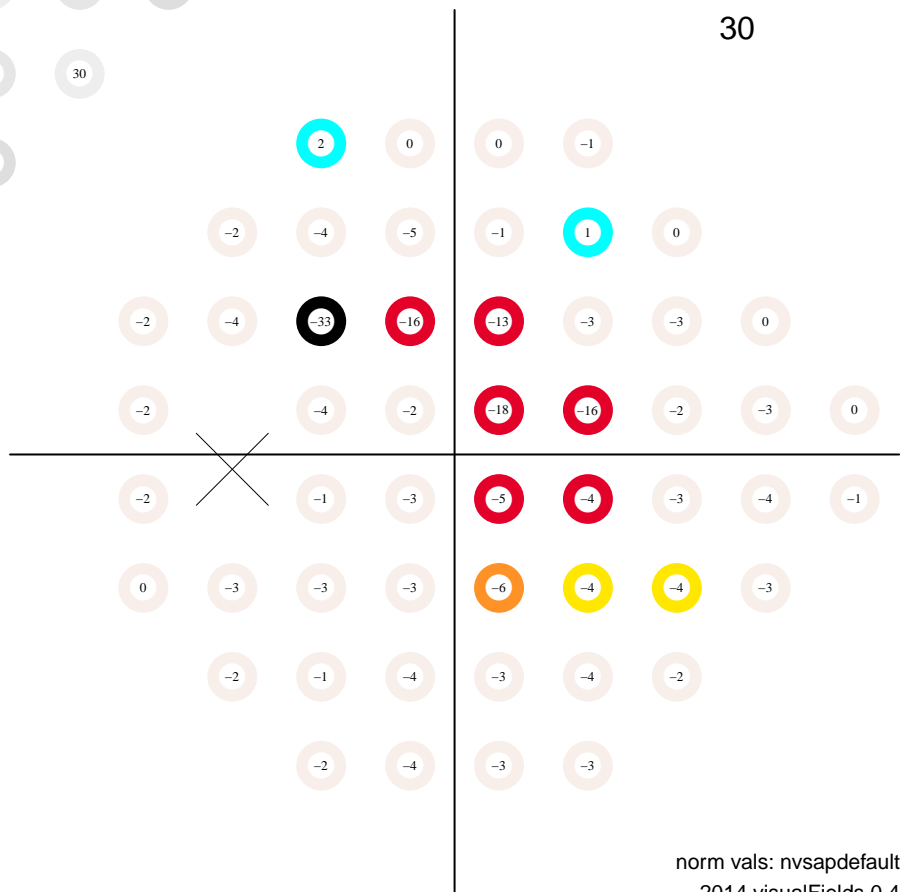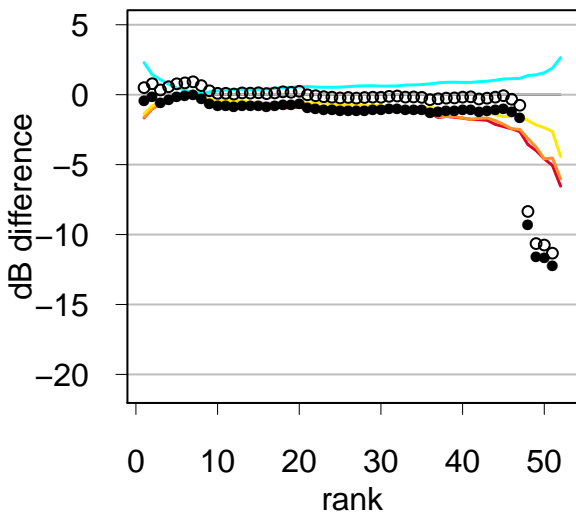

# Static Automated Perimetry. Single field analysis

Subject ID: 1022, age: 71, eye: OS (left)

Date: 12/18/2012 at 9:38:

Duration: 05:44, pause: 00:00

false positives 2.0 %

false negatives 4.0 %

fixation losses 0.0 %

MS 28.0 dB

MD -1.7 dB (p < 95 %)

PSD 6.1 dB (p < 95 %)

VFI 90.3 % (p < 0.5 %)

GH 1.9 dB

total deviation

Central 24-2  
SITA standard

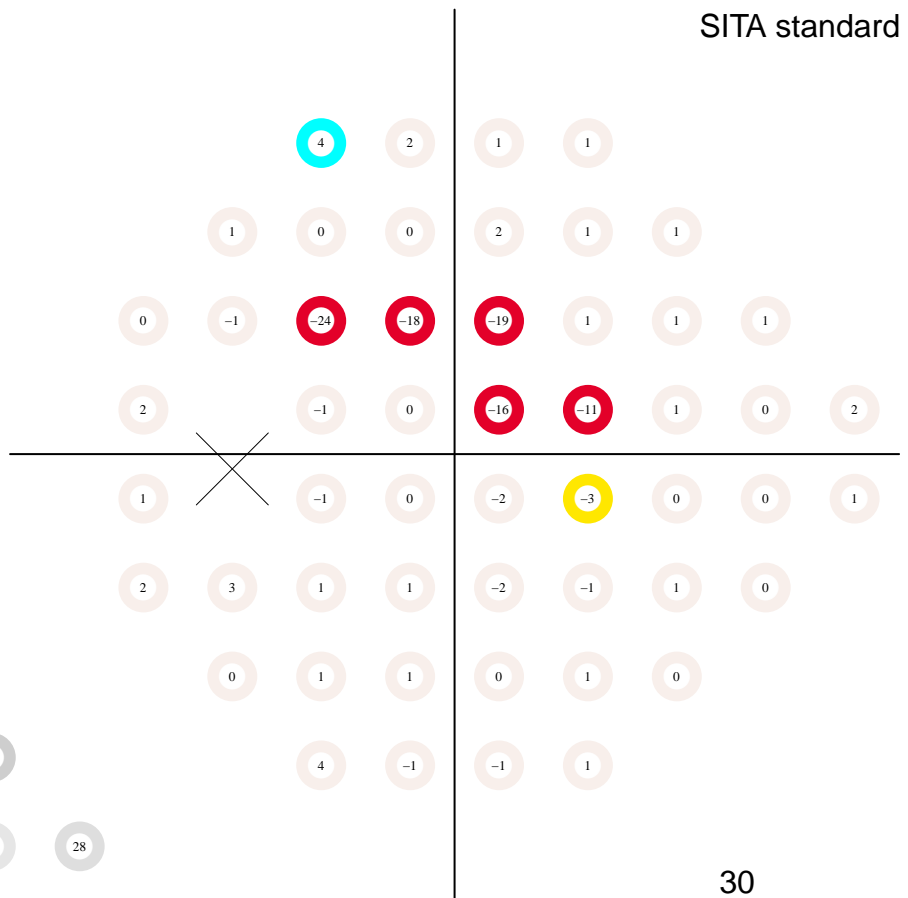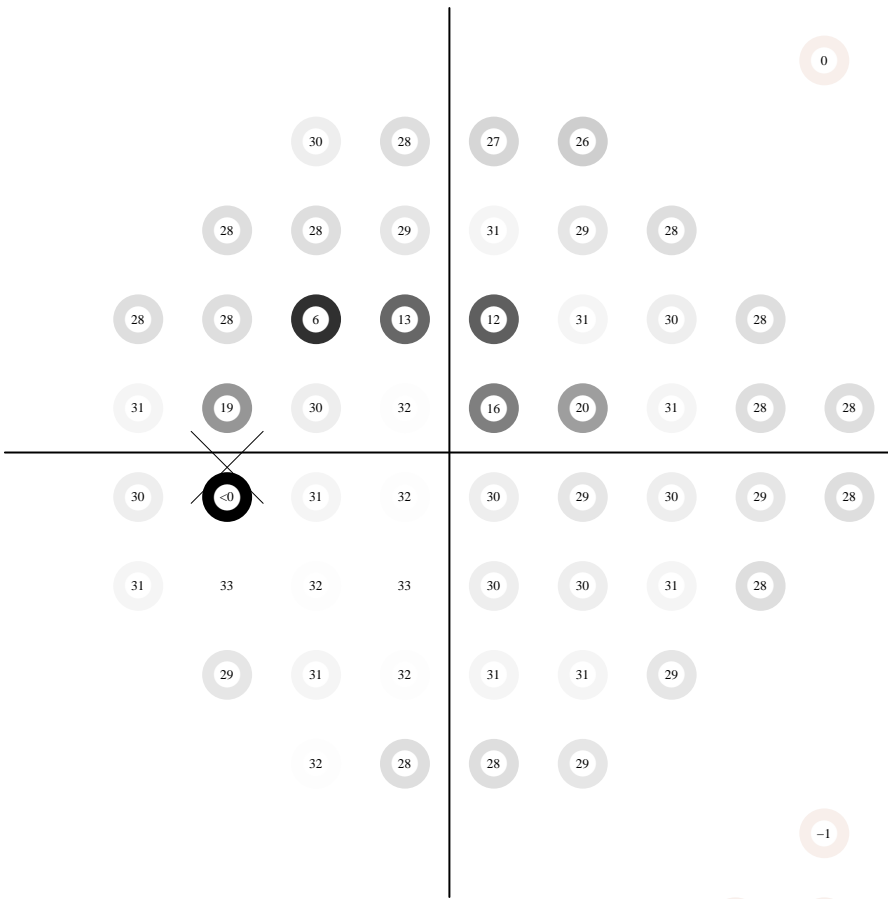

pattern deviation

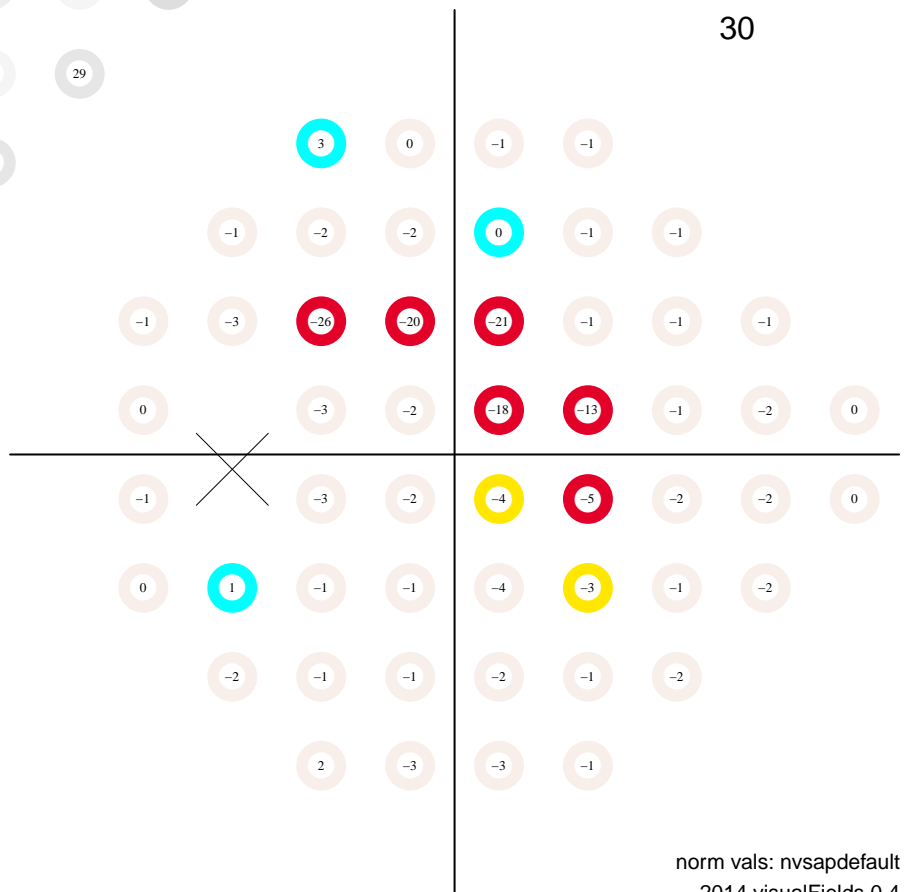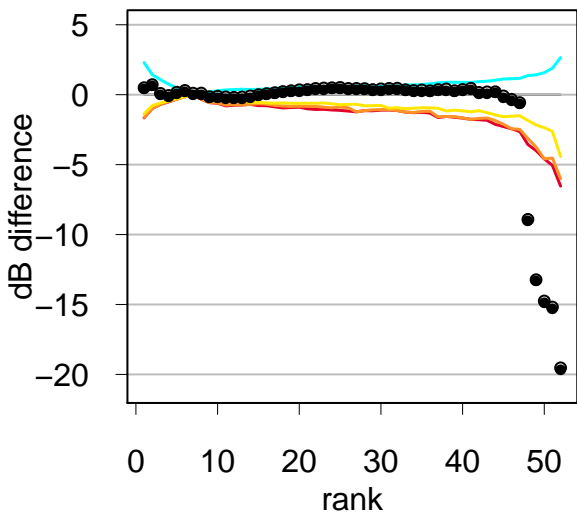

# Static Automated Perimetry. Single field analysis

Subject ID: 1022, age: 71, eye: OS (left)

Date: 03/26/2013 at 9:37:

Duration: 04:45, pause: 00:00

false positives 2.0 %

false negatives 0.0 %

fixation losses 0.0 %

MS 28.6 dB

MD -1.1 dB (p < 95 %)

PSD 5.7 dB (p < 95 %)

VFI 92.7 % (p < 0.5 %)

GH 1.8 dB

total deviation

Central 24-2  
SITA standard

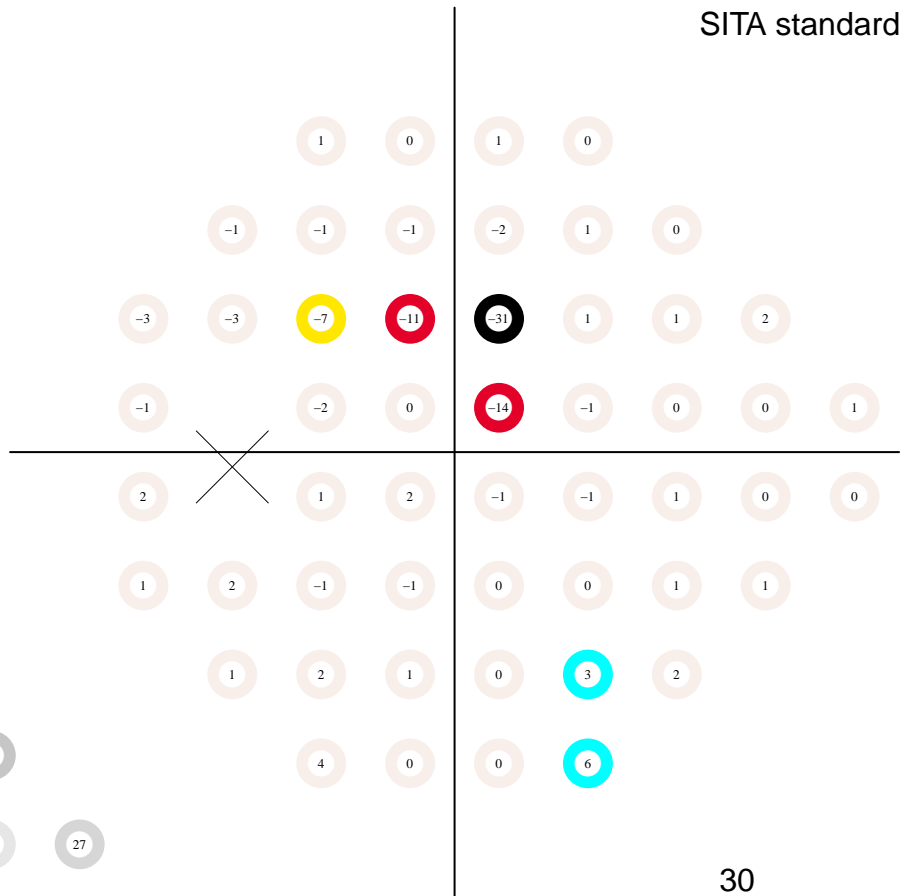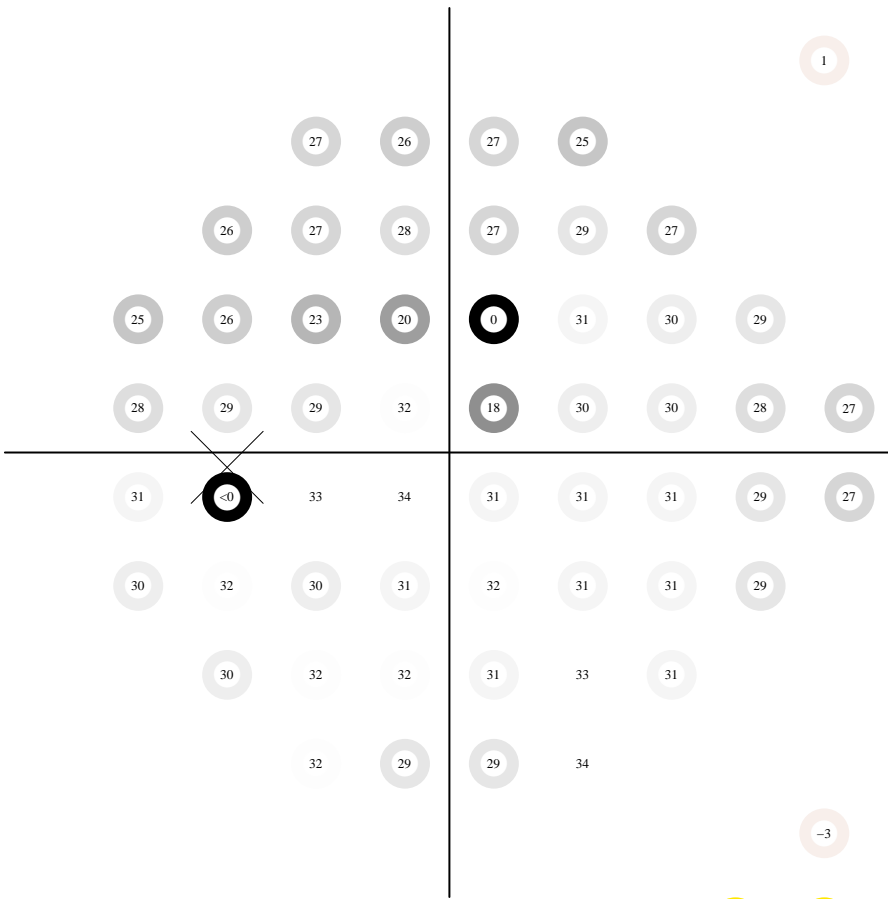

pattern deviation

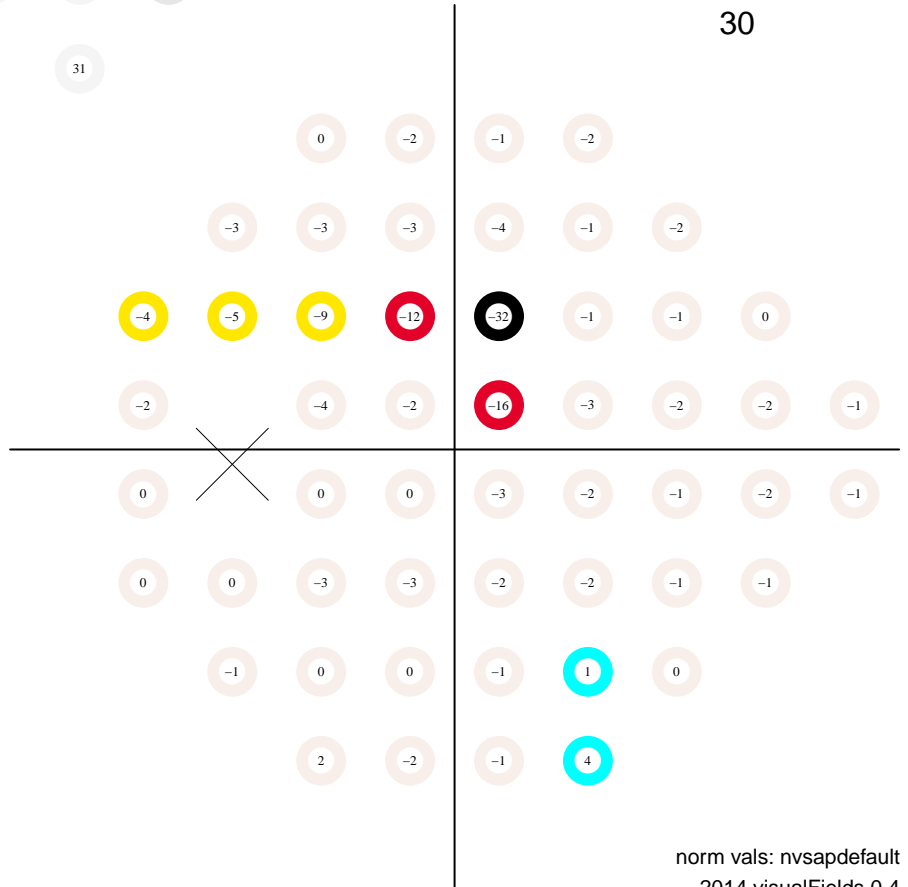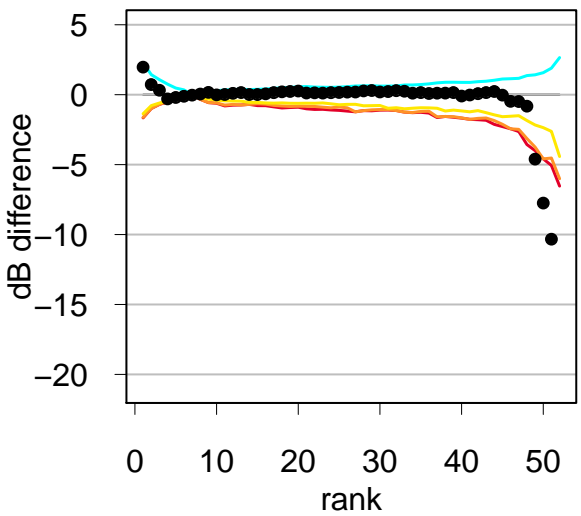

# Static Automated Perimetry. Single field analysis

Subject ID: 1022, age: 71, eye: OS (left)

Date: 08/13/2013 at 9:51:

Duration: 05:38, pause: 00:00

false positives 3.0 %

false negatives 0.0 %

fixation losses 0.0 %

MS 28.9 dB

MD -0.8 dB (p < 95 %)

PSD 5.3 dB (p < 95 %)

VFI 94.4 % (p < 0.5 %)

GH 2.1 dB

total deviation

Central 24-2  
SITA standard

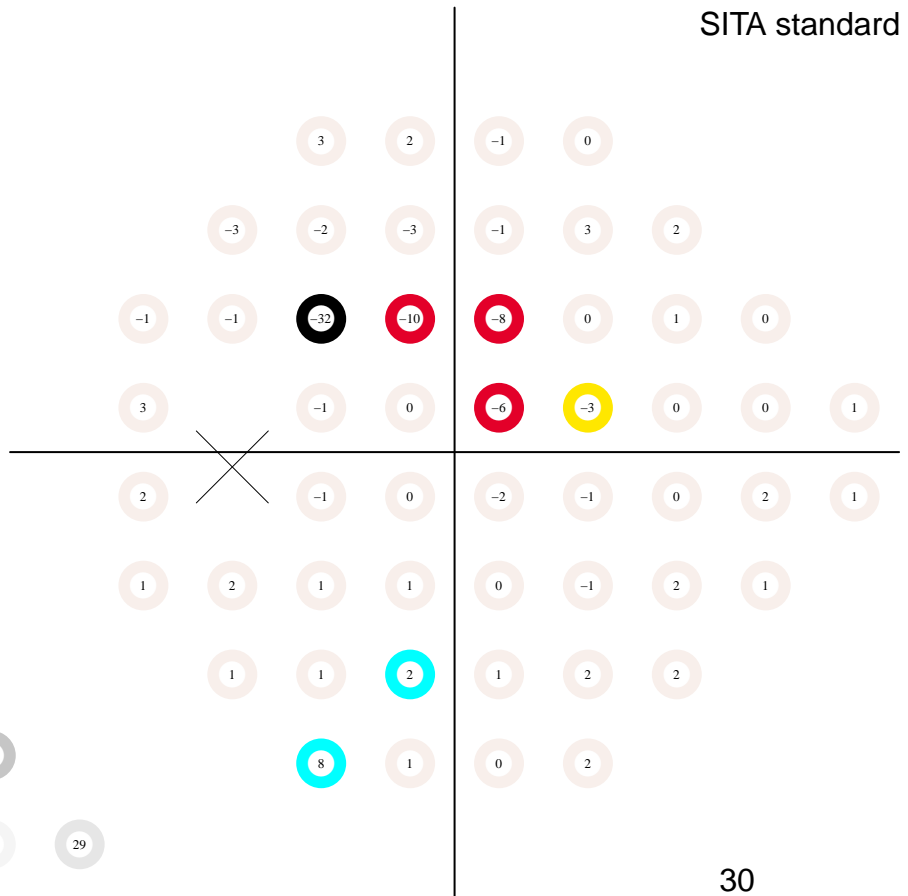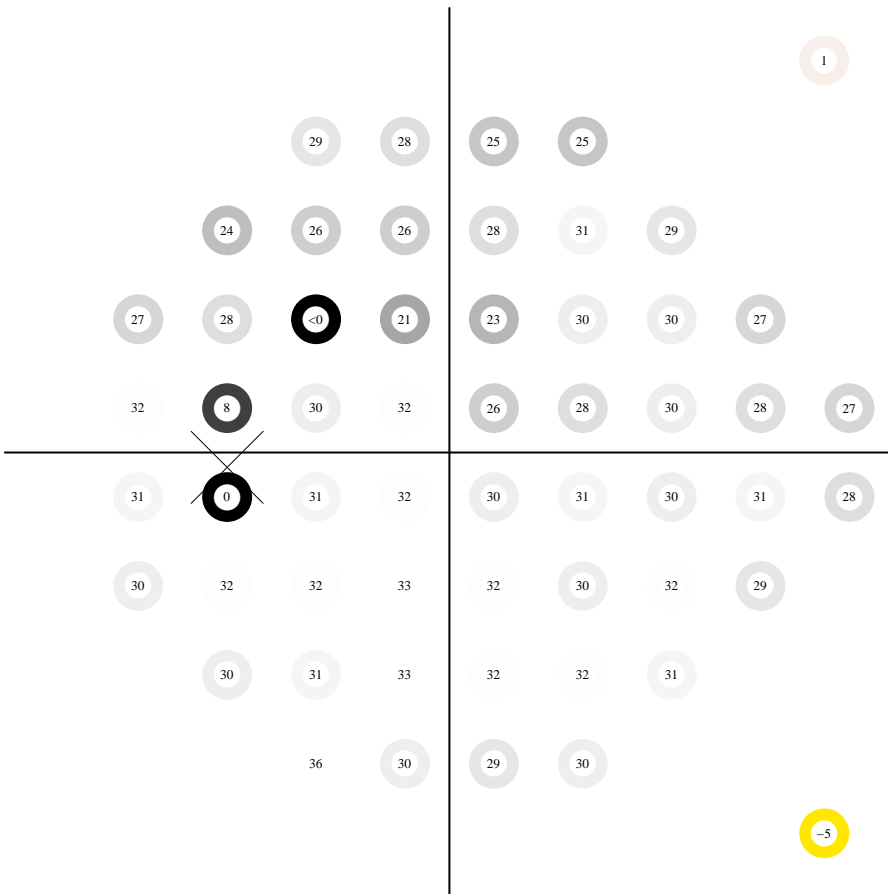

pattern deviation

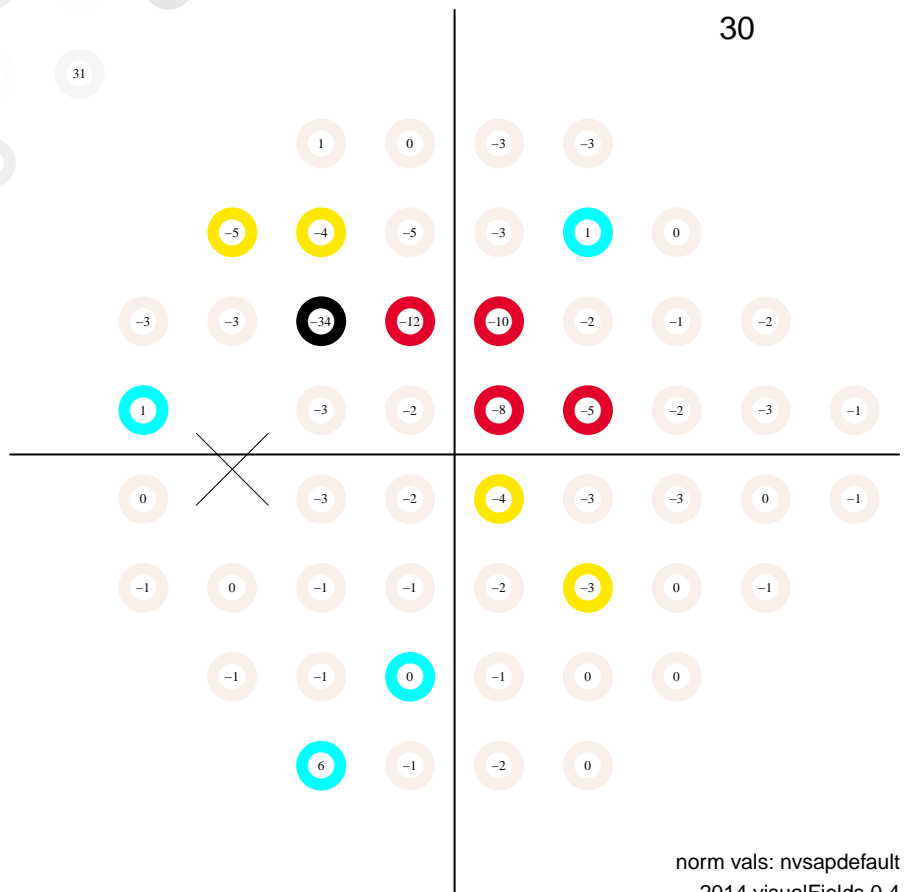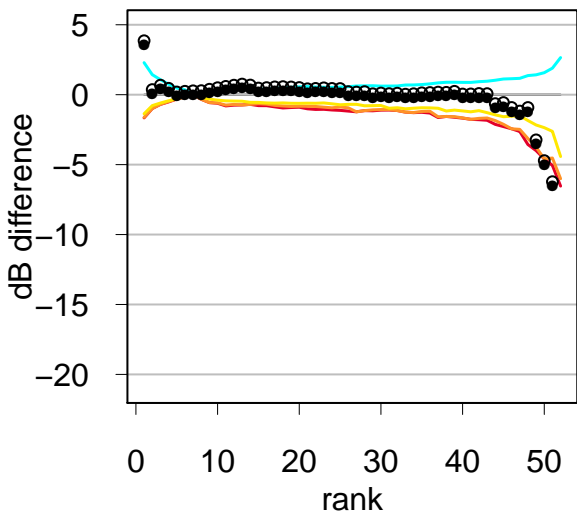

# Static Automated Perimetry. Single field analysis

Subject ID: 1023, age: 53, eye: OS (left)

Date: 07/15/2005 at 10:35

Duration: 05:58, pause: 00:00

false positives 2.0 %

false negatives 0.0 %

fixation losses 0.0 %

MS 27.1 dB

MD -3.7 dB (p < 0.5 %)

PSD 2.6 dB (p < 0.5 %)

VFI 95.9 % (p < 1 %)

GH -0.7 dB

total deviation

Central 24-2  
SITA standard

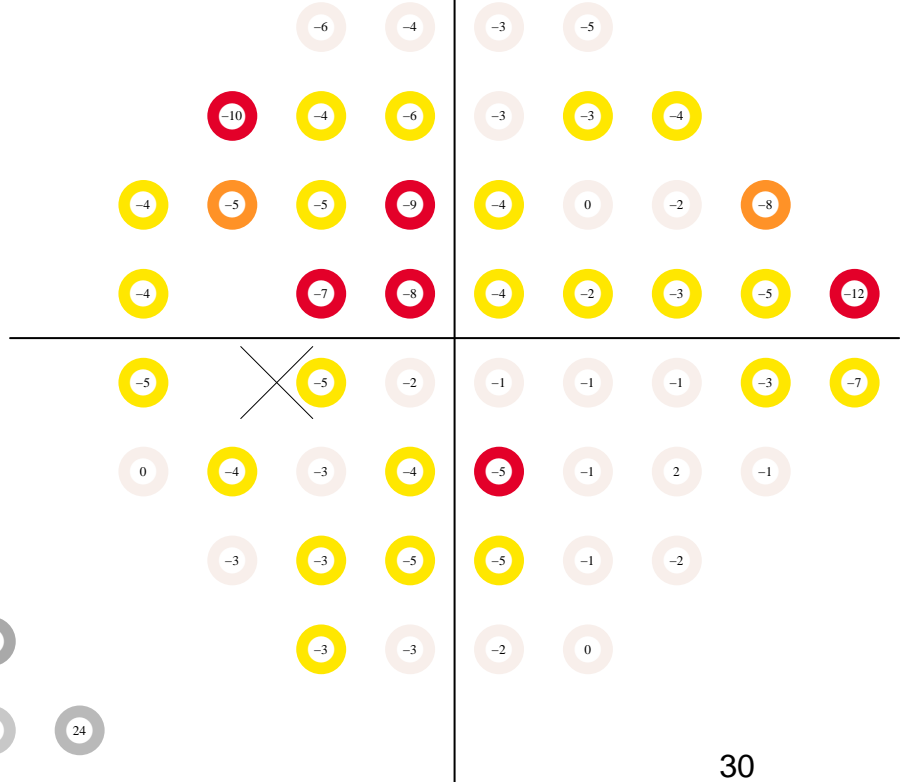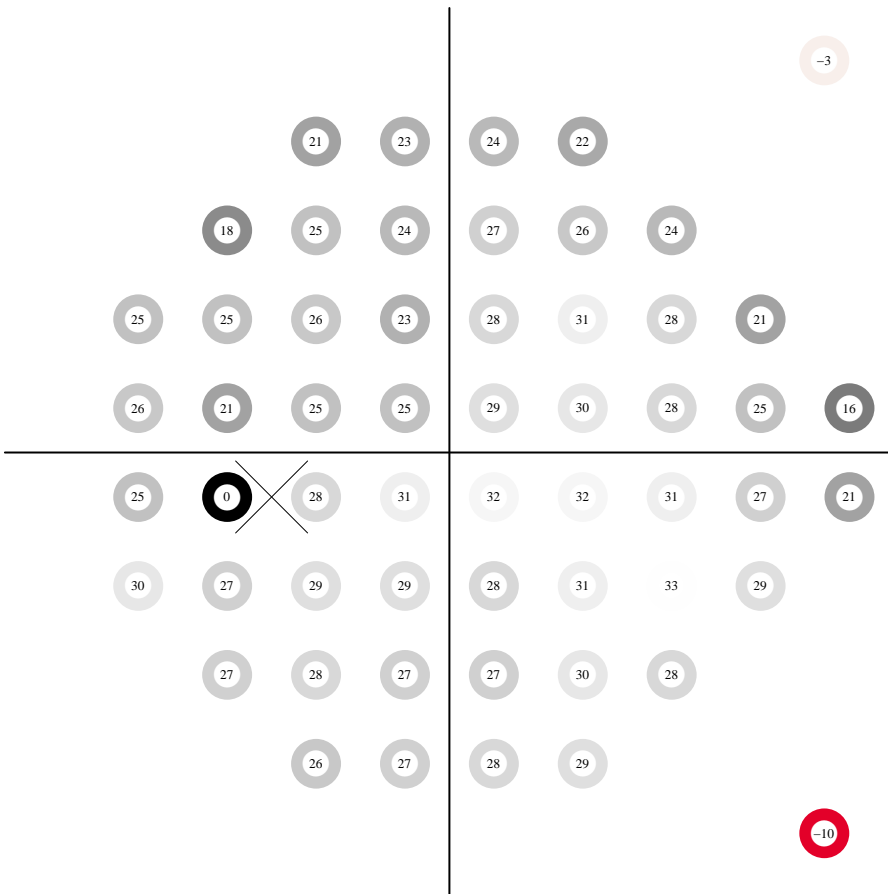

pattern deviation

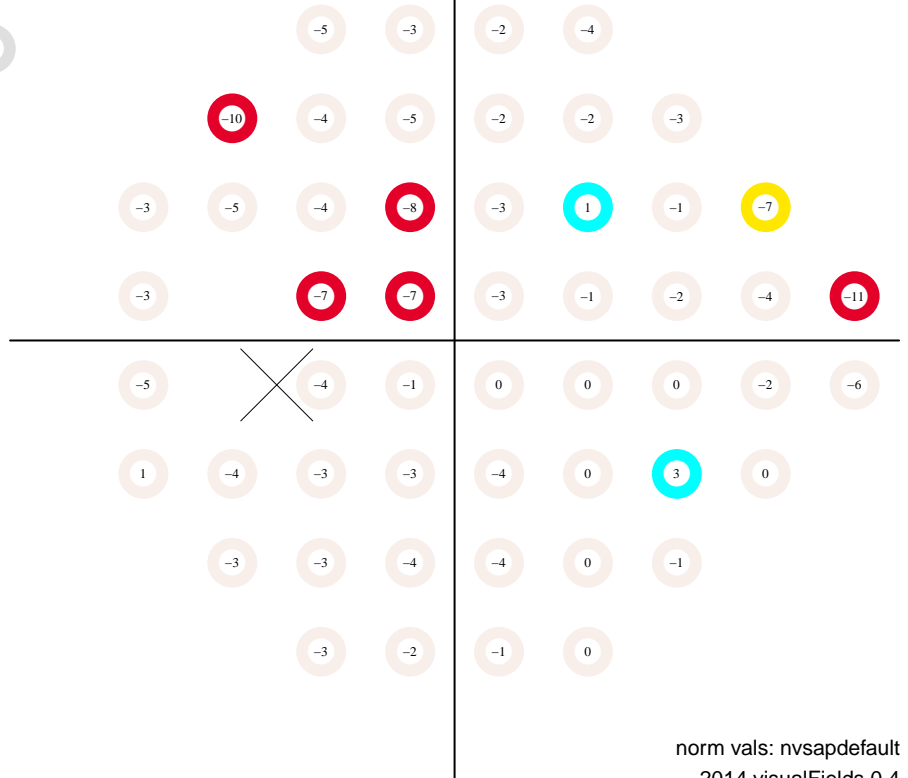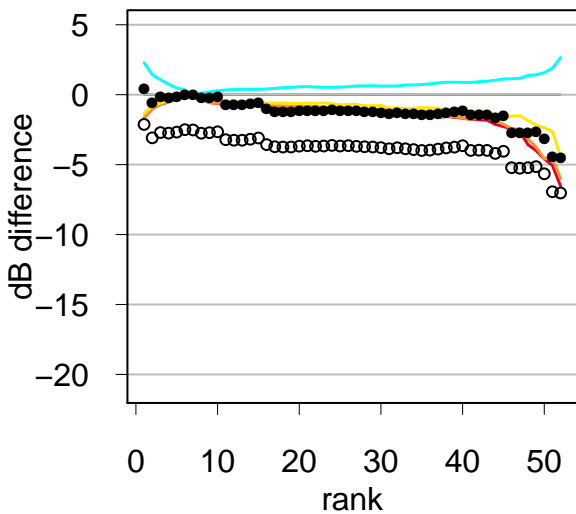



# Static Automated Perimetry. Single field analysis

Subject ID: 1023, age: 54, eye: OS (left)

Date: 07/31/2006 at 11:07

Duration: 05:31, pause: 00:00

false positives 1.0 %

false negatives 0.0 %

fixation losses 26.7 %

MS 27.0 dB

MD -3.7 dB (p < 0.5 %)

PSD 2.8 dB (p < 0.5 %)

VFI 95.7 % (p < 0.5 %)

GH -1.1 dB

total deviation

Central 24-2  
SITA standard

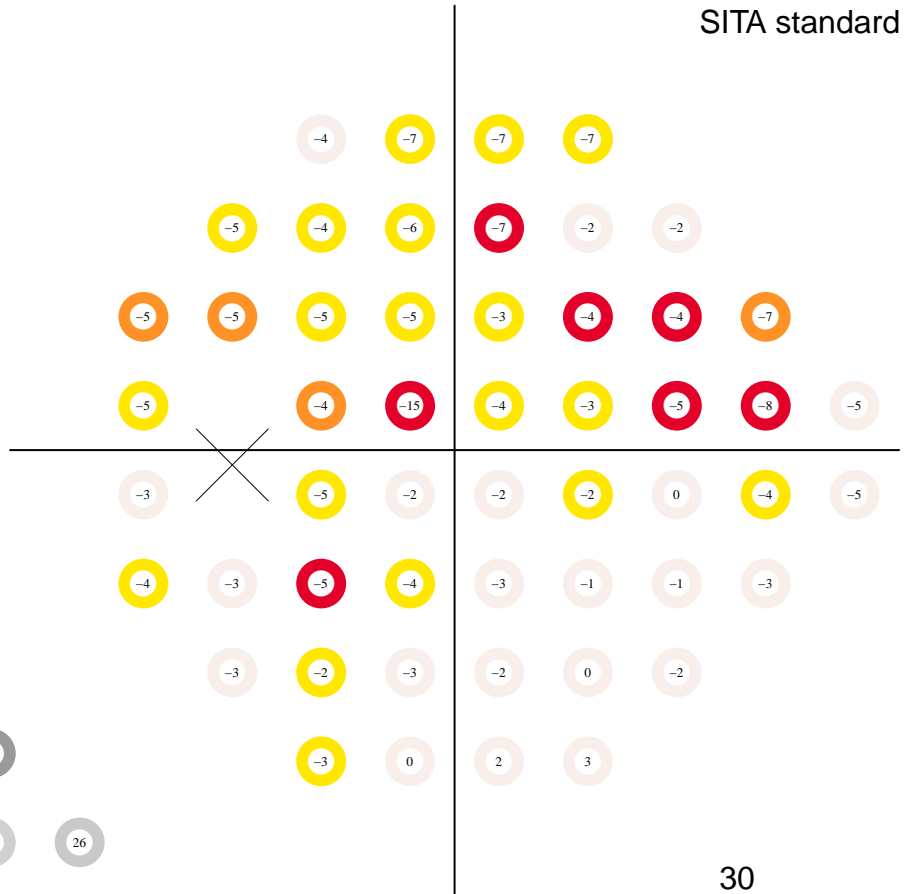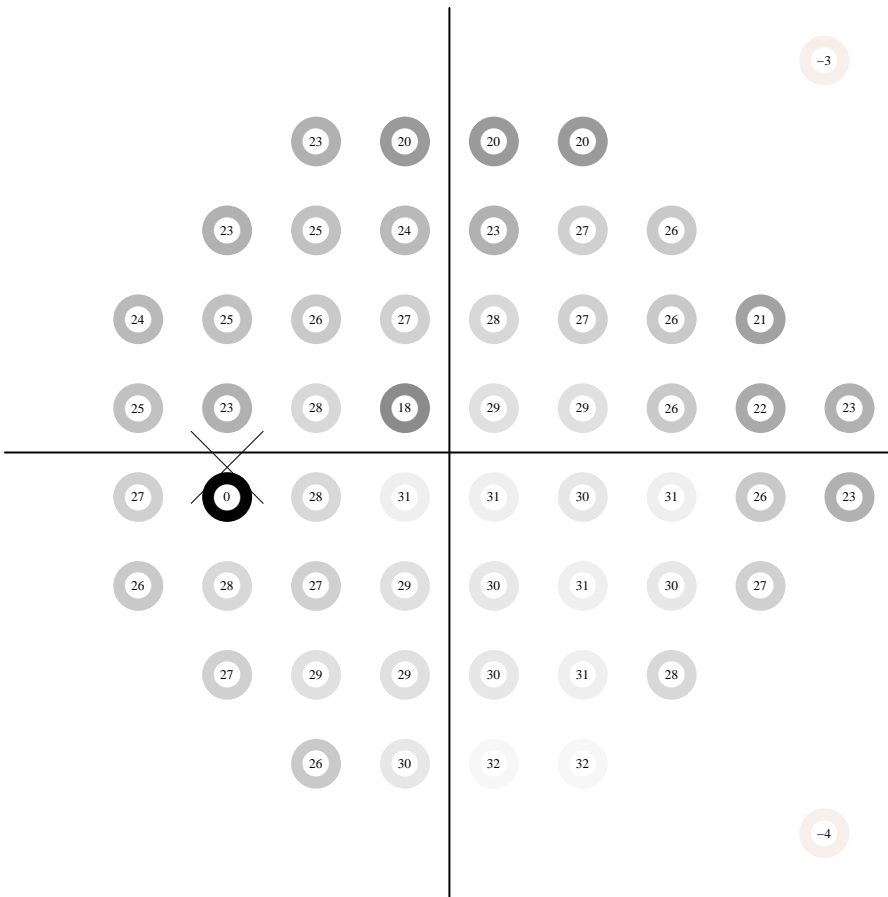

pattern deviation

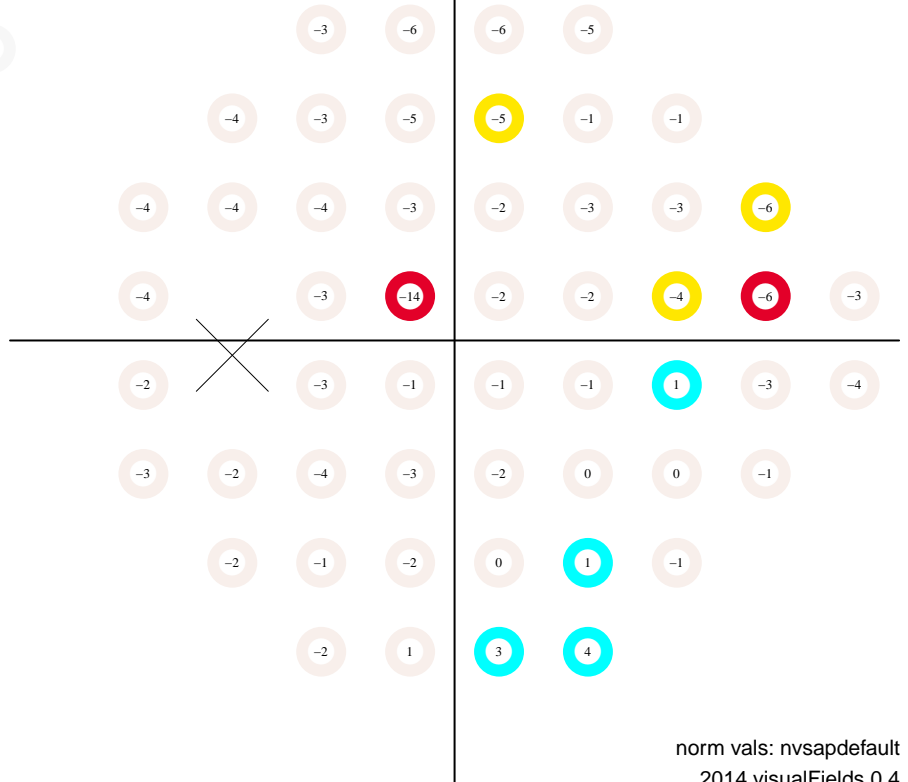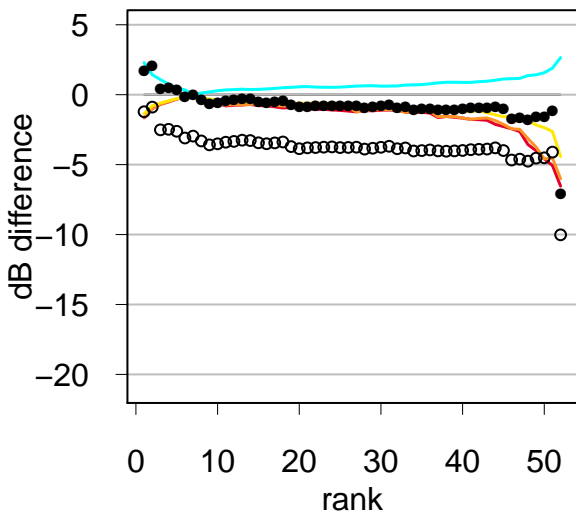

# Static Automated Perimetry. Single field analysis

Subject ID: 1023, age: 54, eye: OS (left)

Date: 06/27/2007 at 6:25:

Duration: 05:26, pause: 00:00

false positives 5.0 %

false negatives 0.0 %

fixation losses 33.3 %

MS 28.3 dB

MD -2.4 dB (p < 95 %)

PSD 2.1 dB (p < 95 %)

VFI 98.8 % (p < 95 %)

GH -0.1 dB

total deviation

Central 24-2  
SITA standard

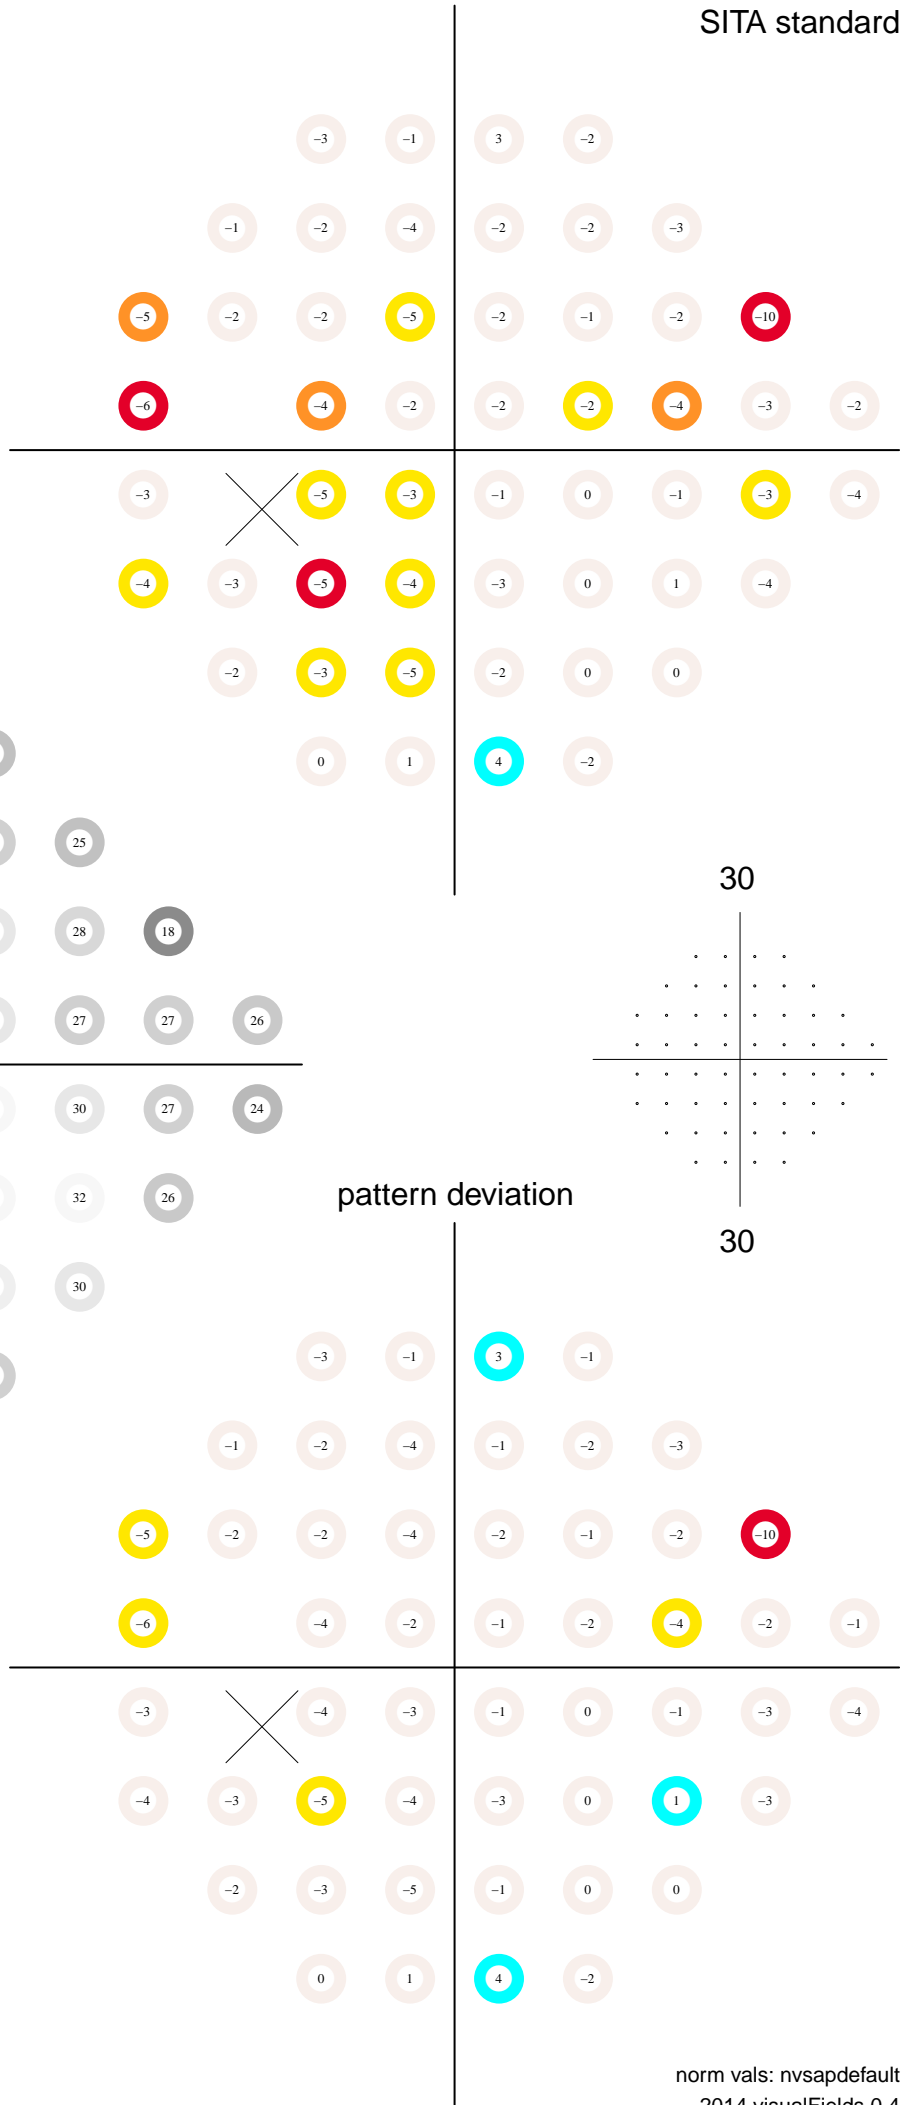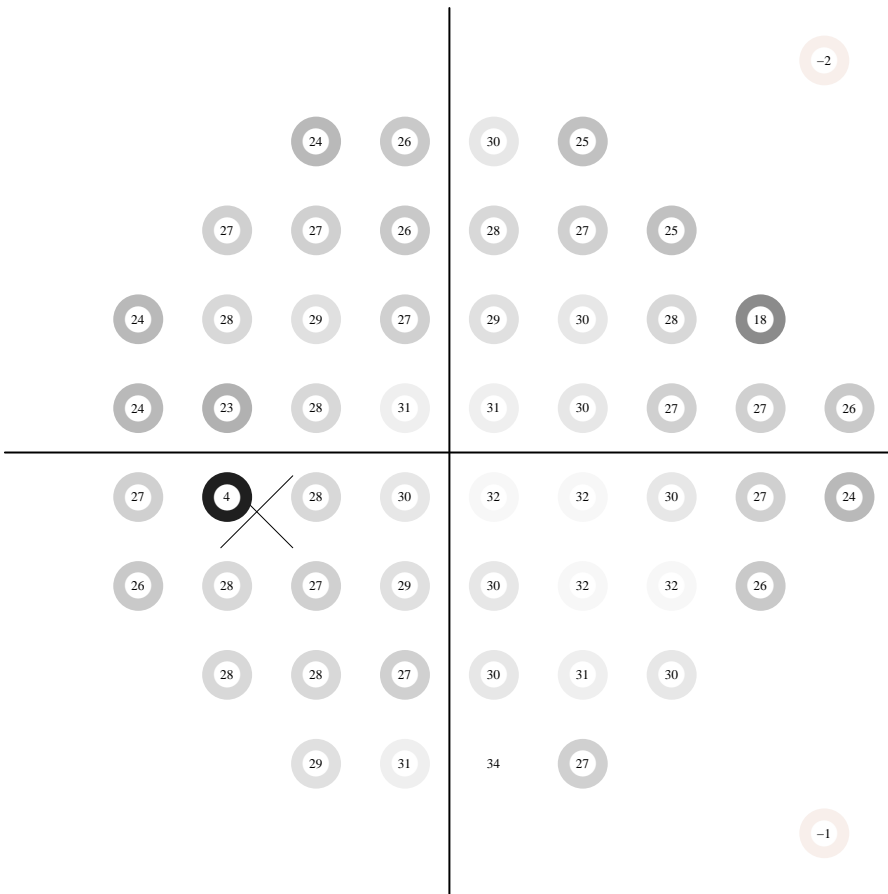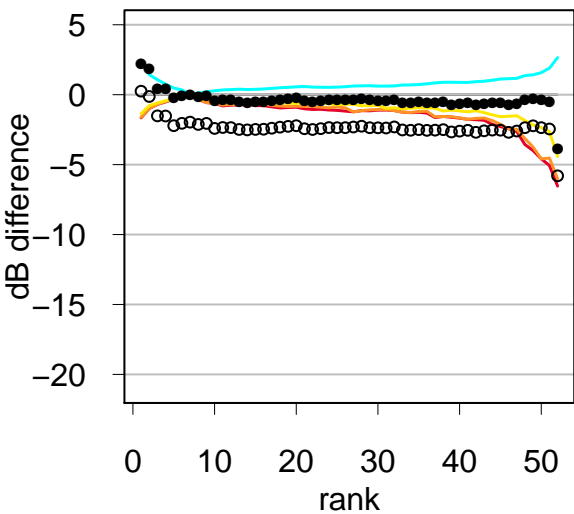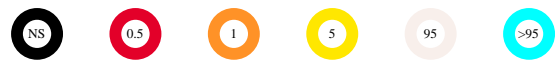

# Static Automated Perimetry. Single field analysis

Subject ID: 1023, age: 55, eye: OS (left)

Date: 07/31/2007 at 13:49

Duration: 05:24, pause: 00:00

false positives 1.0 %

false negatives 3.0 %

fixation losses 13.3 %

MS 26.5 dB

MD -4.2 dB (p < 0.5 %)

PSD 3.5 dB (p < 0.5 %)

VFI 94.8 % (p < 0.5 %)

GH -1.8 dB

total deviation

Central 24-2  
SITA standard

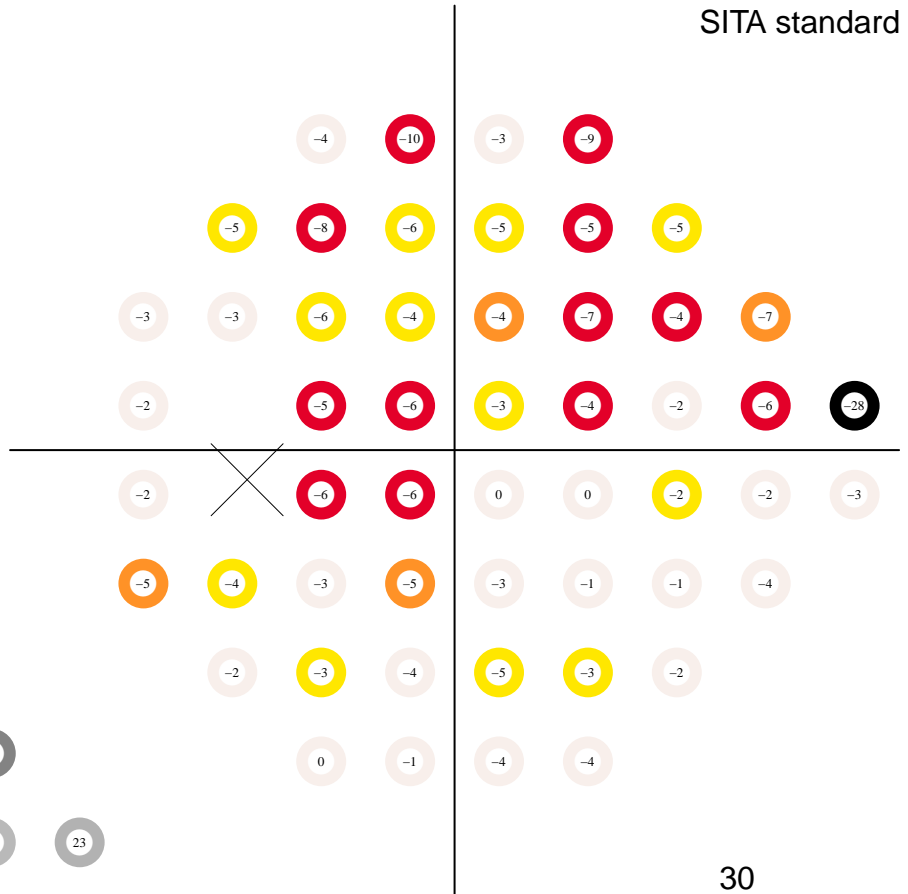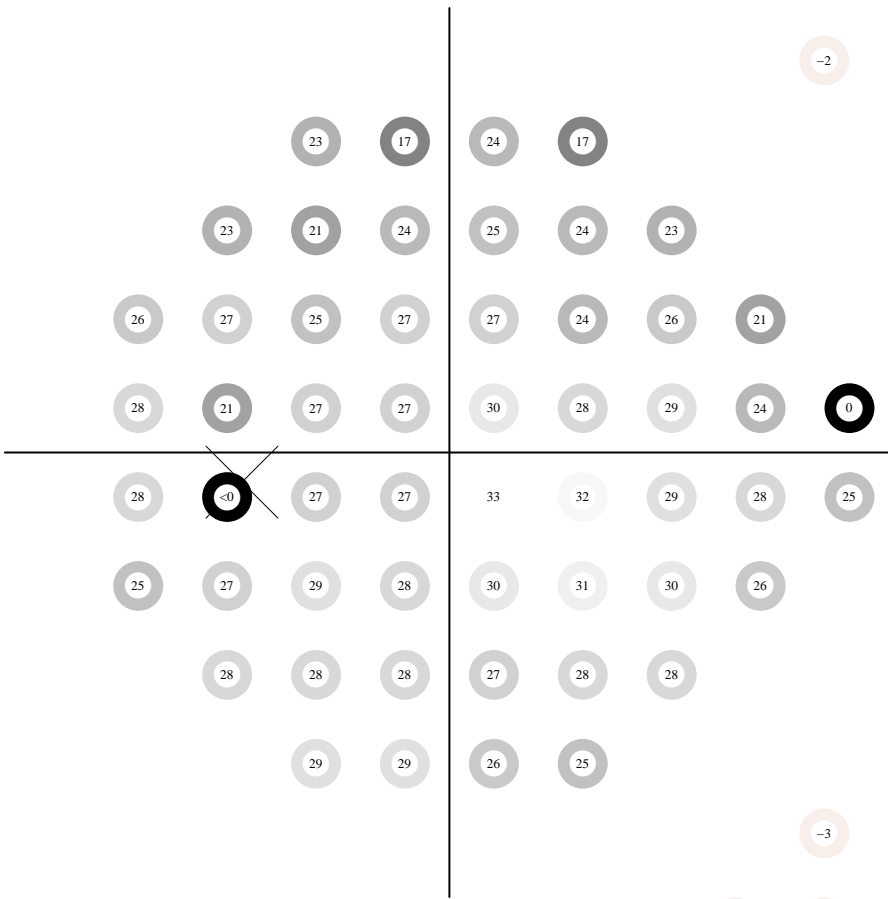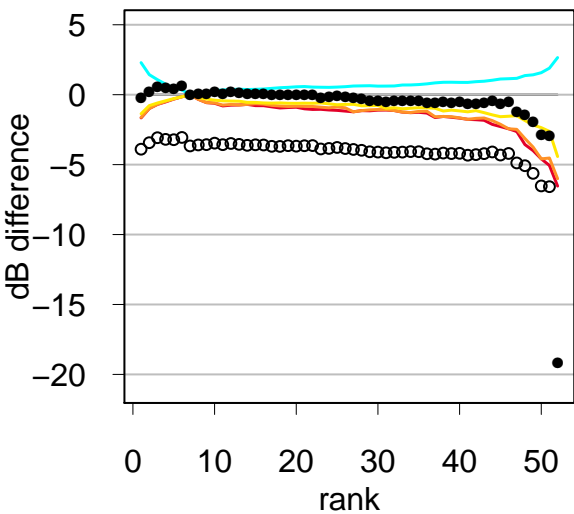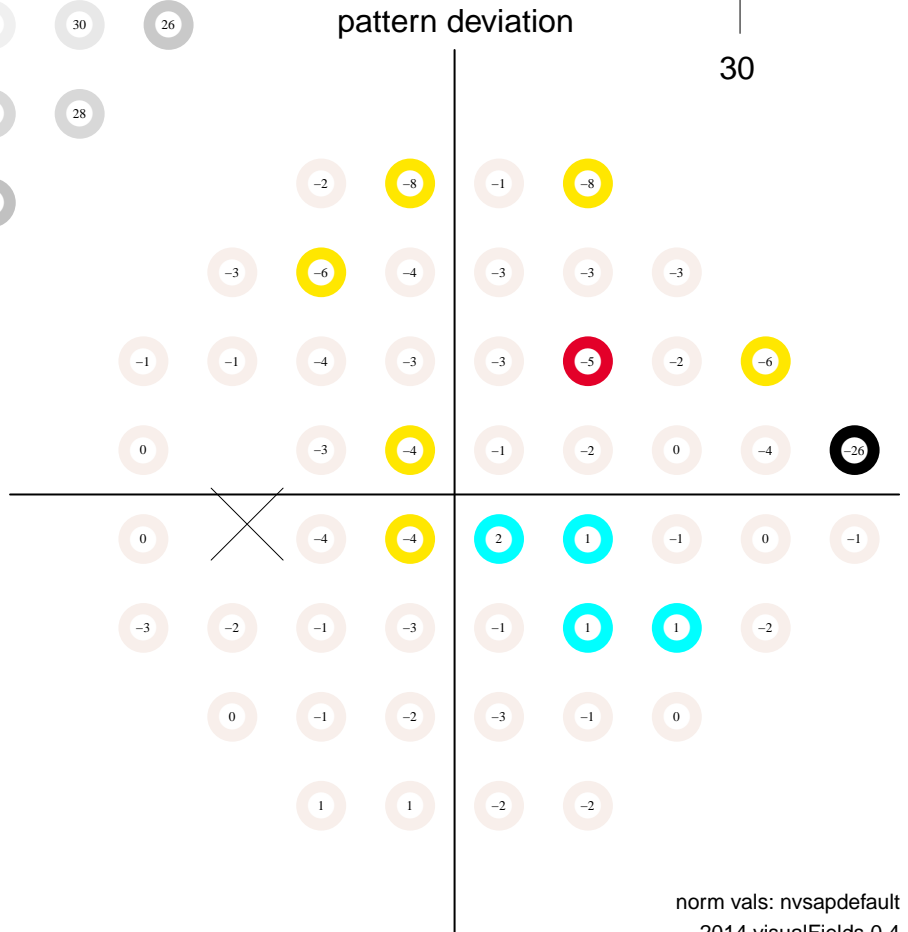

# Static Automated Perimetry. Single field analysis

Subject ID: 1023, age: 55, eye: OS (left)

Date: 02/05/2008 at 11:15

Duration: 43:00, pause: 00:00

false positives 1.0 %

false negatives 0.0 %

fixation losses 0.0 %

MS 25.9 dB

MD -4.7 dB (p < 0.5 %)

PSD 3.7 dB (p < 0.5 %)

VFI 91.9 % (p < 0.5 %)

GH -1.4 dB

total deviation

Central 24-2  
SITA standard

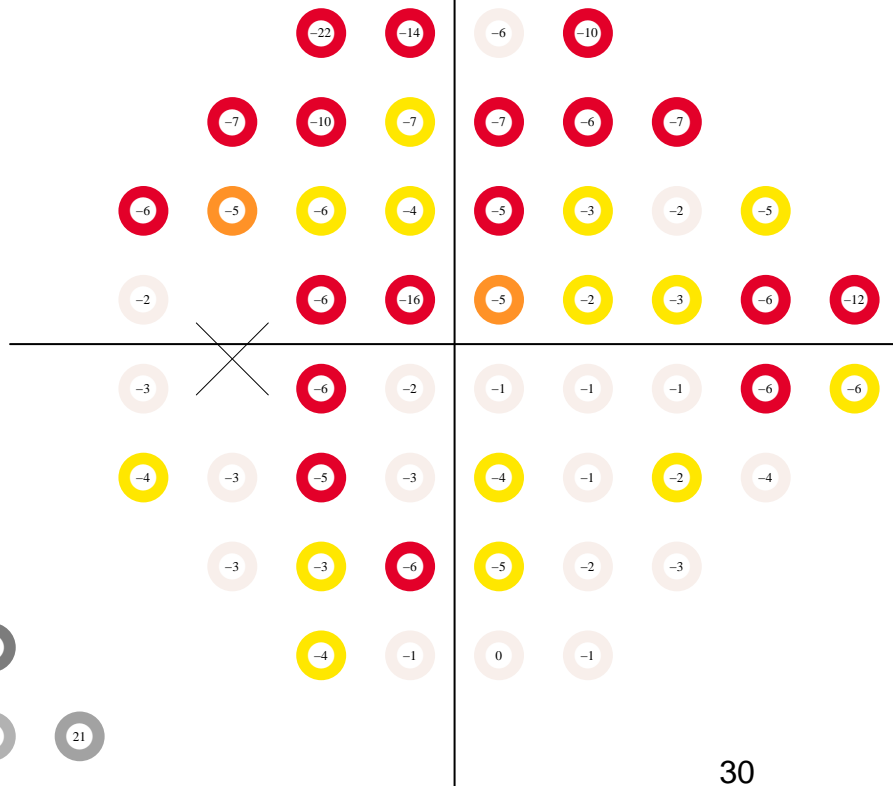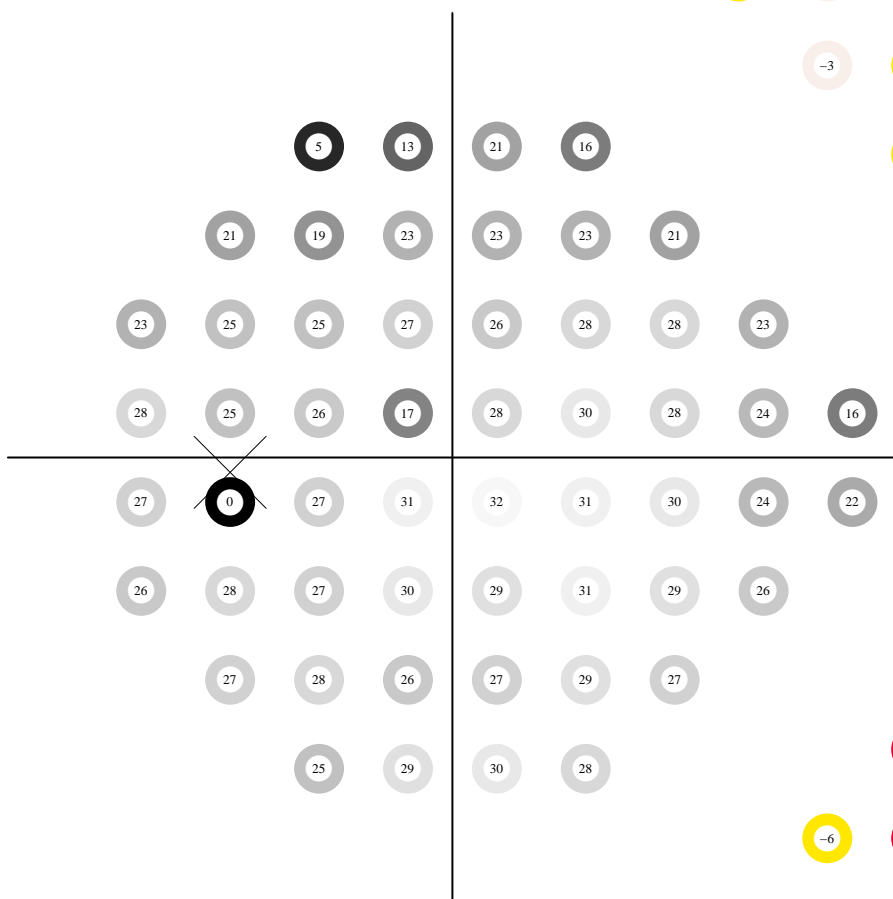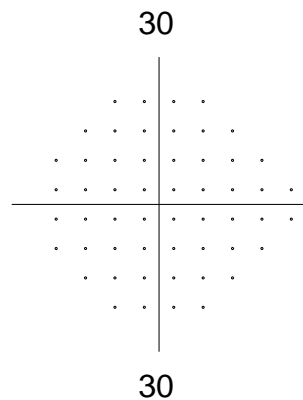

pattern deviation

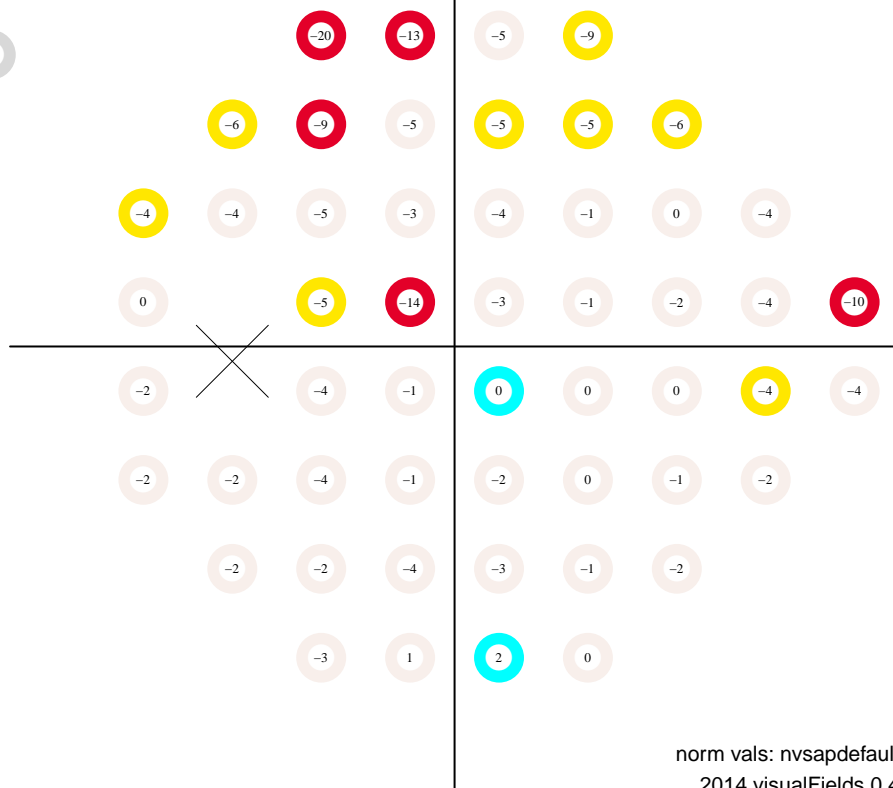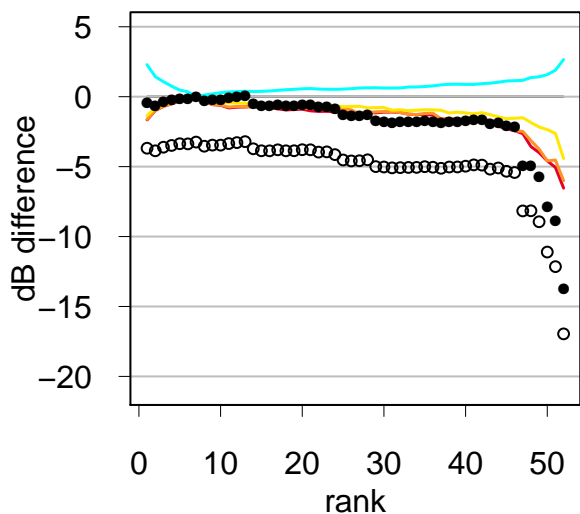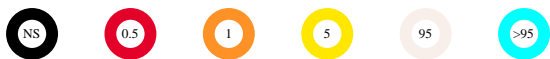

# Static Automated Perimetry. Single field analysis

Subject ID: 1023, age: 55, eye: OS (left)

Date: 02/27/2008 at 10:17

Duration: 05:08, pause: 00:00

false positives 4.0 %

false negatives 1.0 %

fixation losses 35.7 %

MS 27.1 dB

MD -3.6 dB (p < 0.5 %)

PSD 2.6 dB (p < 0.5 %)

VFI 94.7 % (p < 0.5 %)

GH -1.1 dB

total deviation

Central 24-2  
SITA standard

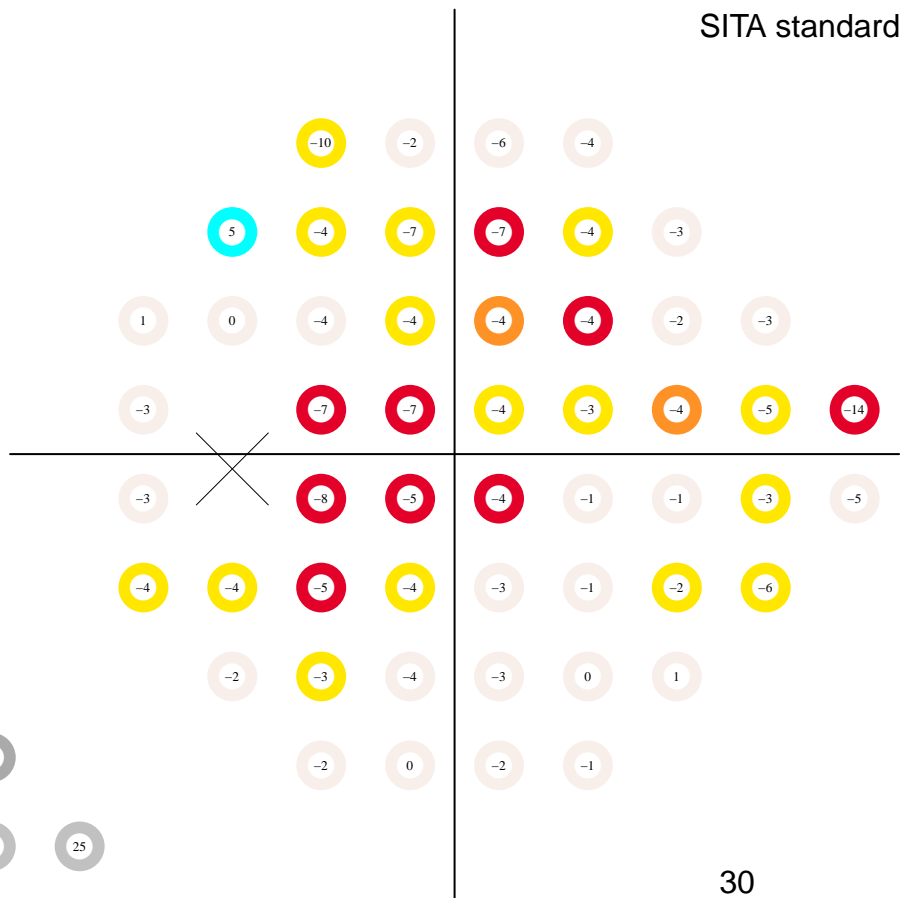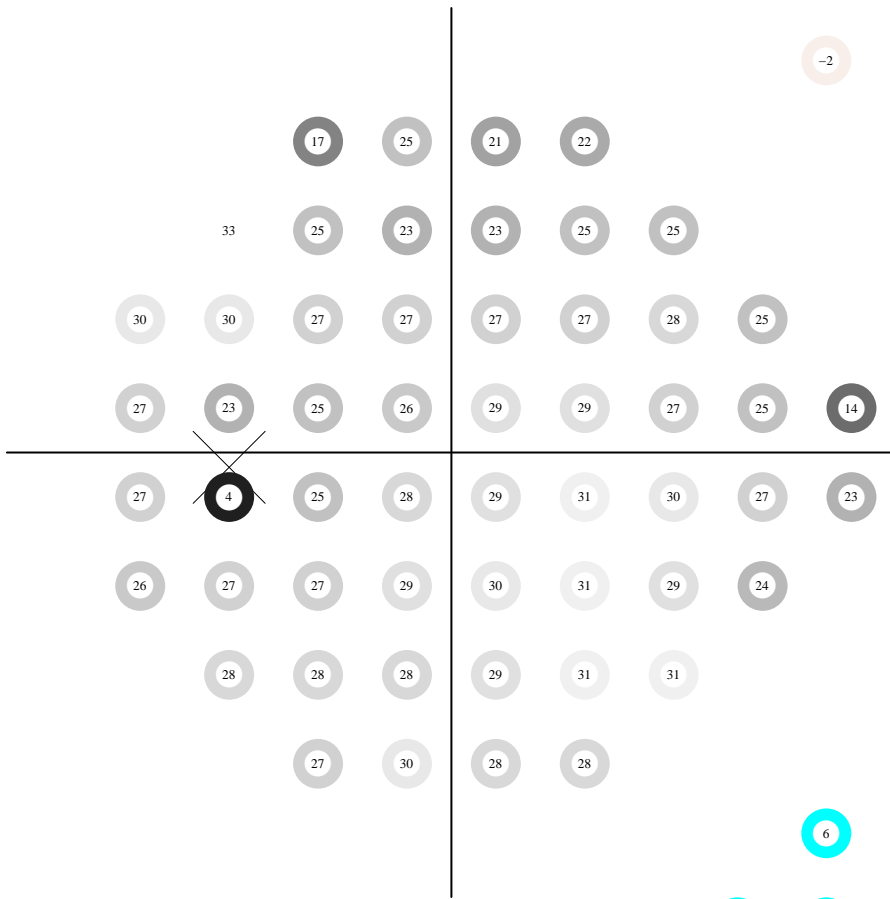

pattern deviation

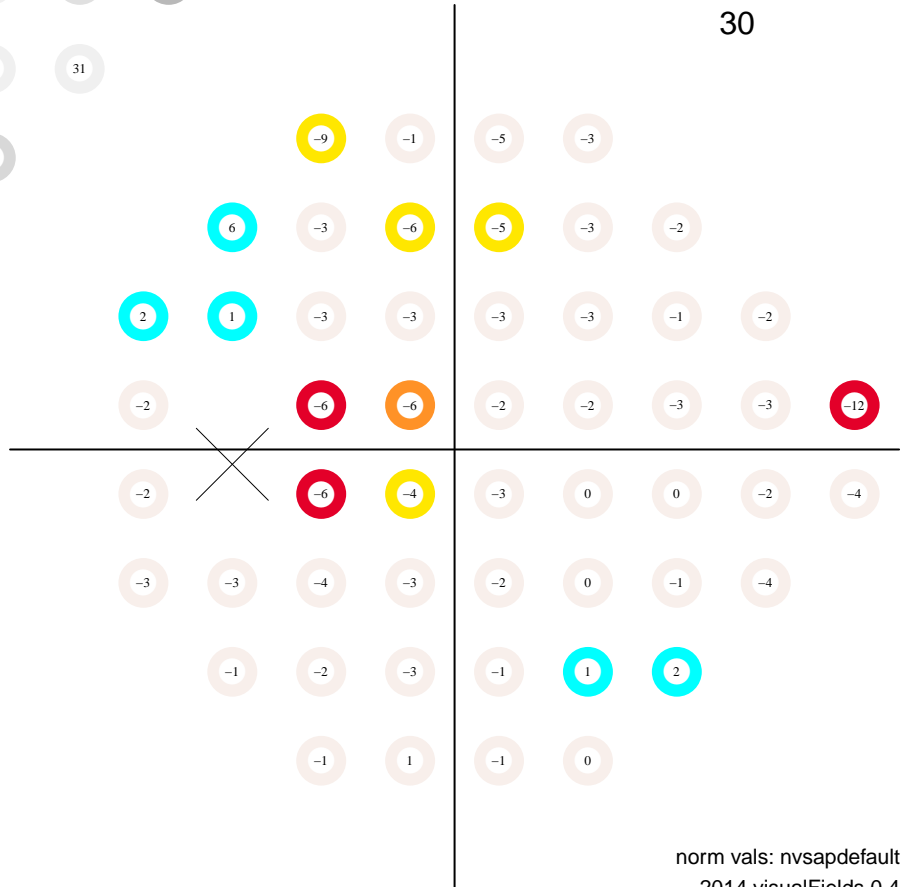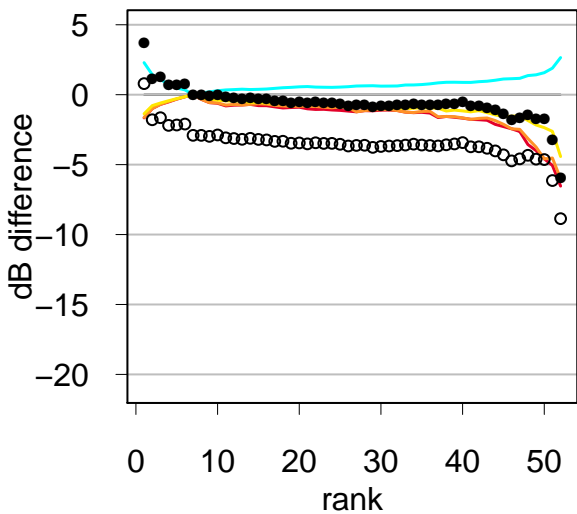

# Static Automated Perimetry. Single field analysis

Subject ID: 1023, age: 56, eye: OS (left)

Date: 08/19/2008 at 10:38

Duration: 06:09, pause: 00:00

false positives 2.0 %

false negatives 8.0 %

fixation losses 6.7 %

MS 24.7 dB

MD -5.9 dB (p < 0.5 %)

PSD 6.3 dB (p < 0.5 %)

VFI 84.9 % (p < 0.5 %)

GH -2.0 dB

total deviation

Central 24-2  
SITA standard

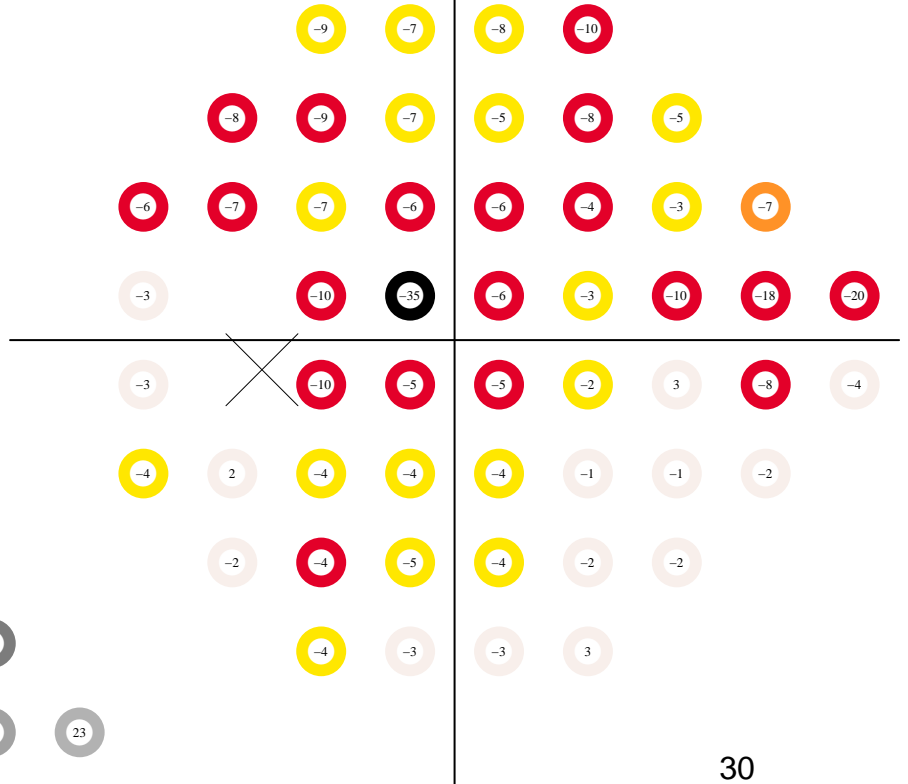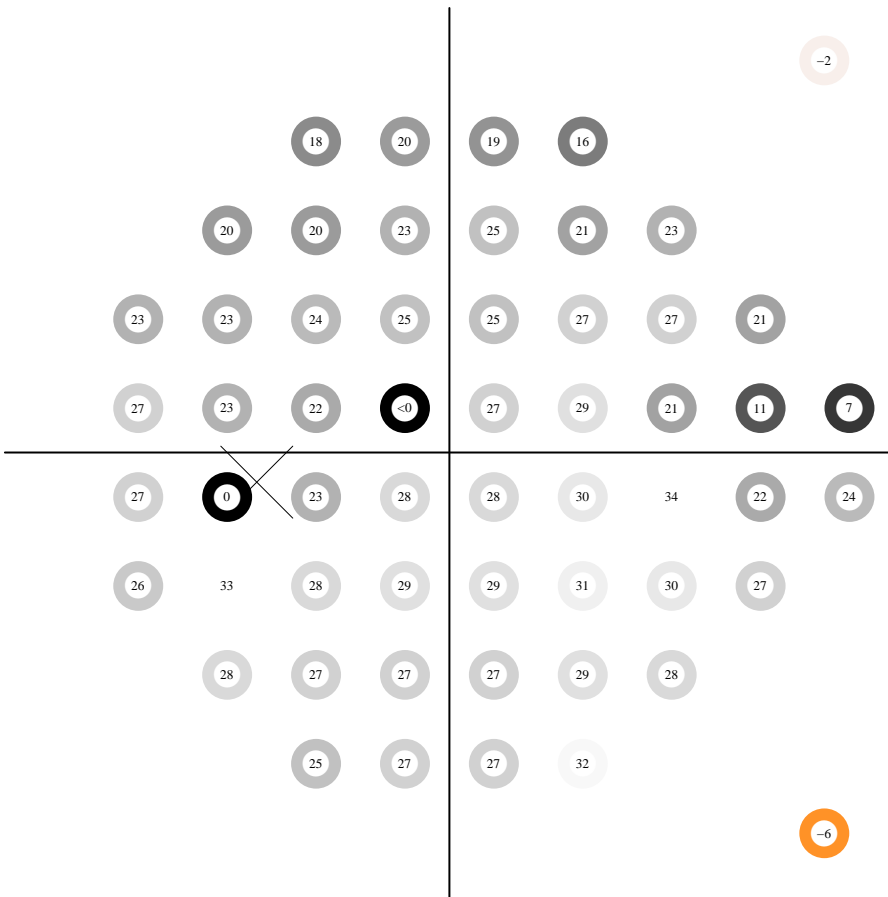

pattern deviation

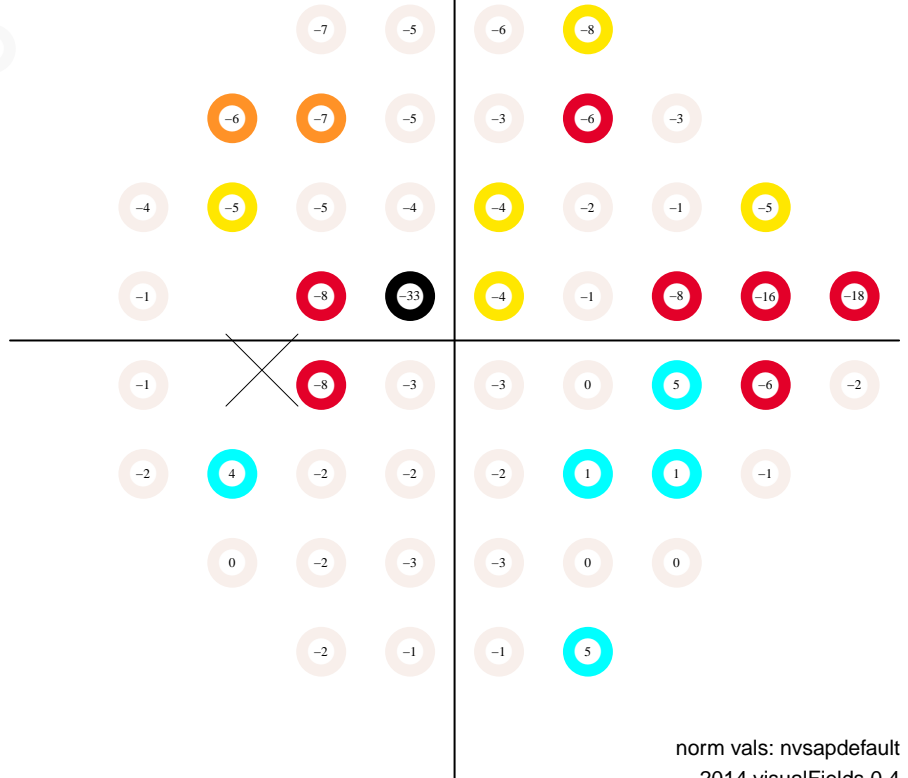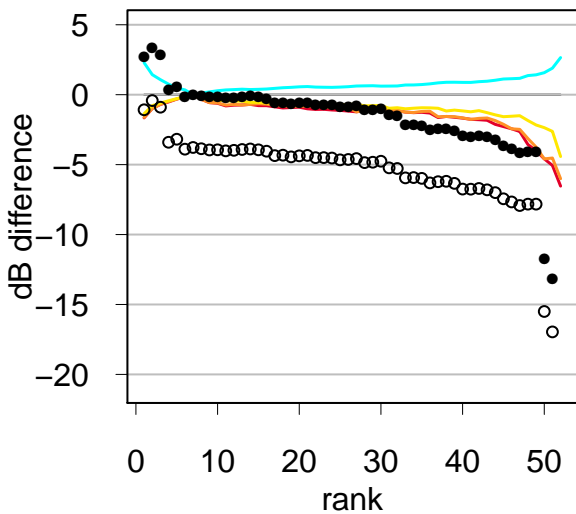

# Static Automated Perimetry. Single field analysis

Subject ID: 1023, age: 56, eye: OS (left)

Date: 08/27/2008 at 9:43:

Duration: 05:30, pause: 00:00

false positives 4.0 %

false negatives 7.0 %

fixation losses 13.3 %

MS 26.3 dB

MD -4.3 dB (p < 0.5 %)

PSD 2.6 dB (p < 0.5 %)

VFI 94.3 % (p < 0.5 %)

GH -1.4 dB

total deviation

Central 24-2  
SITA standard

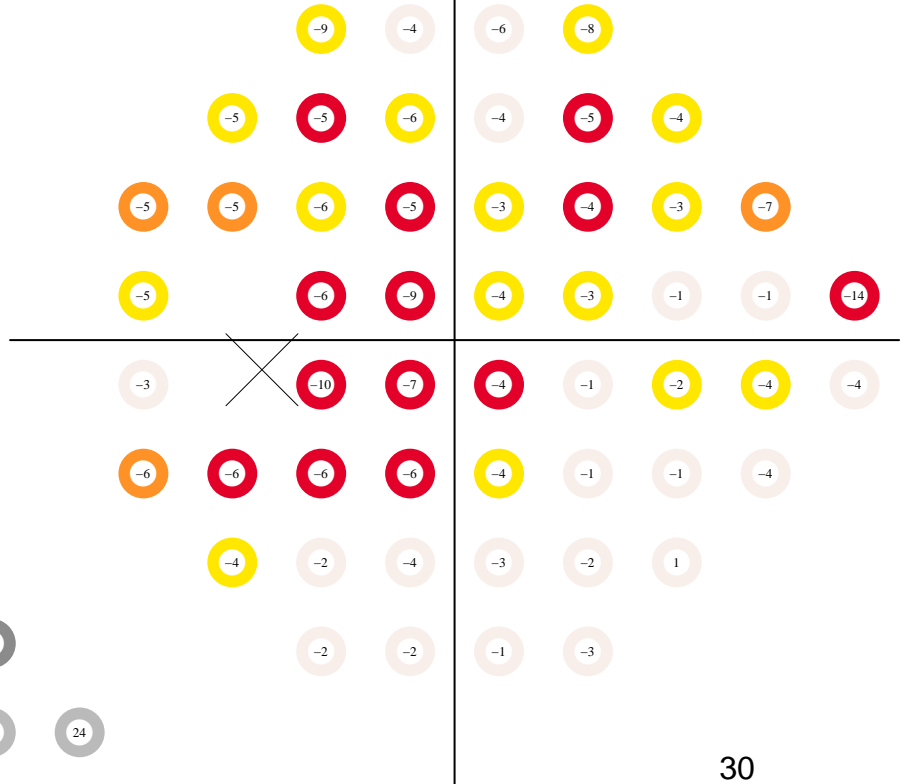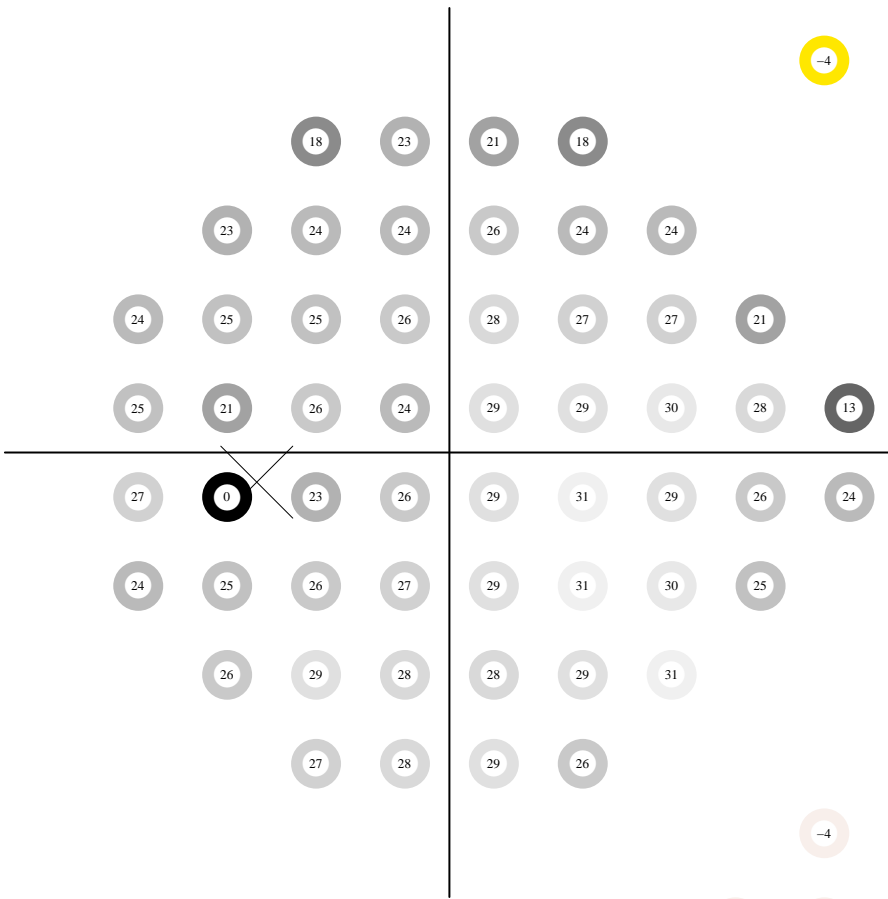

pattern deviation

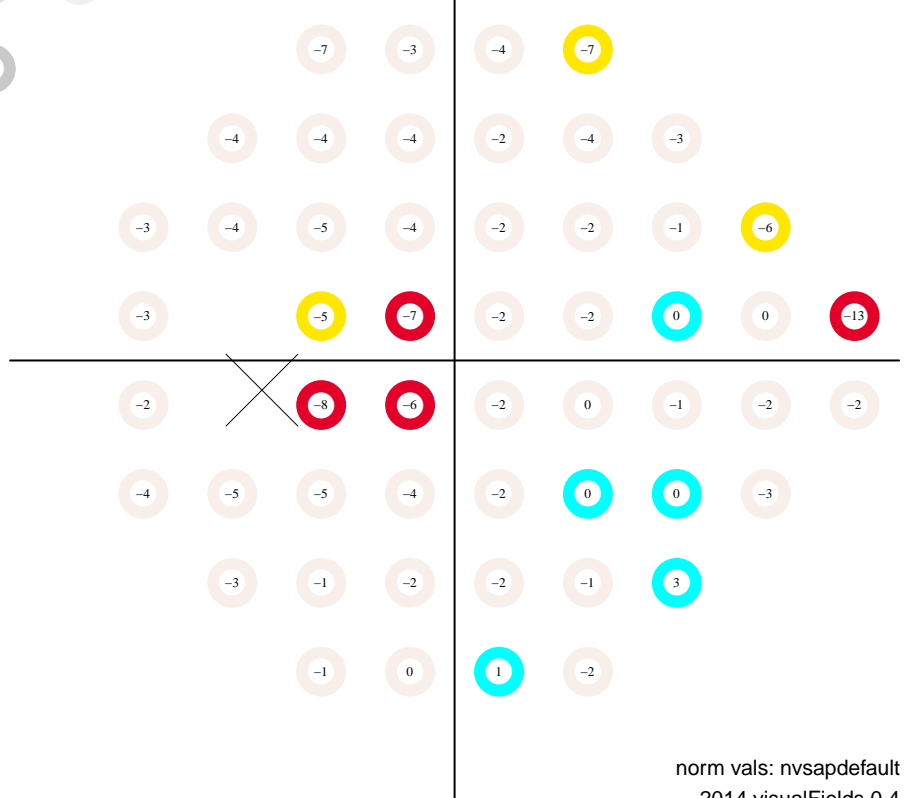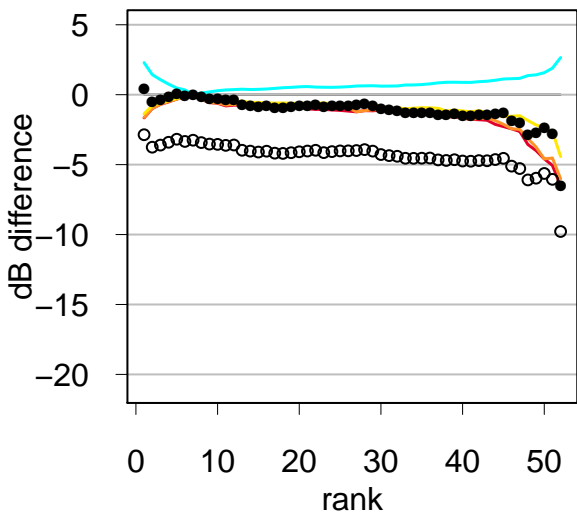

# Static Automated Perimetry. Single field analysis

Subject ID: 1023, age: 56, eye: OS (left)

Date: 12/09/2008 at 11:05

Duration: 05:10, pause: 00:00

false positives 0.0 %

false negatives 4.0 %

fixation losses 42.9 %

MS 27.1 dB

MD -3.5 dB (p < 0.5 %)

PSD 3.8 dB (p < 0.5 %)

VFI 93.0 % (p < 0.5 %)

GH -0.7 dB

total deviation

Central 24-2  
SITA standard

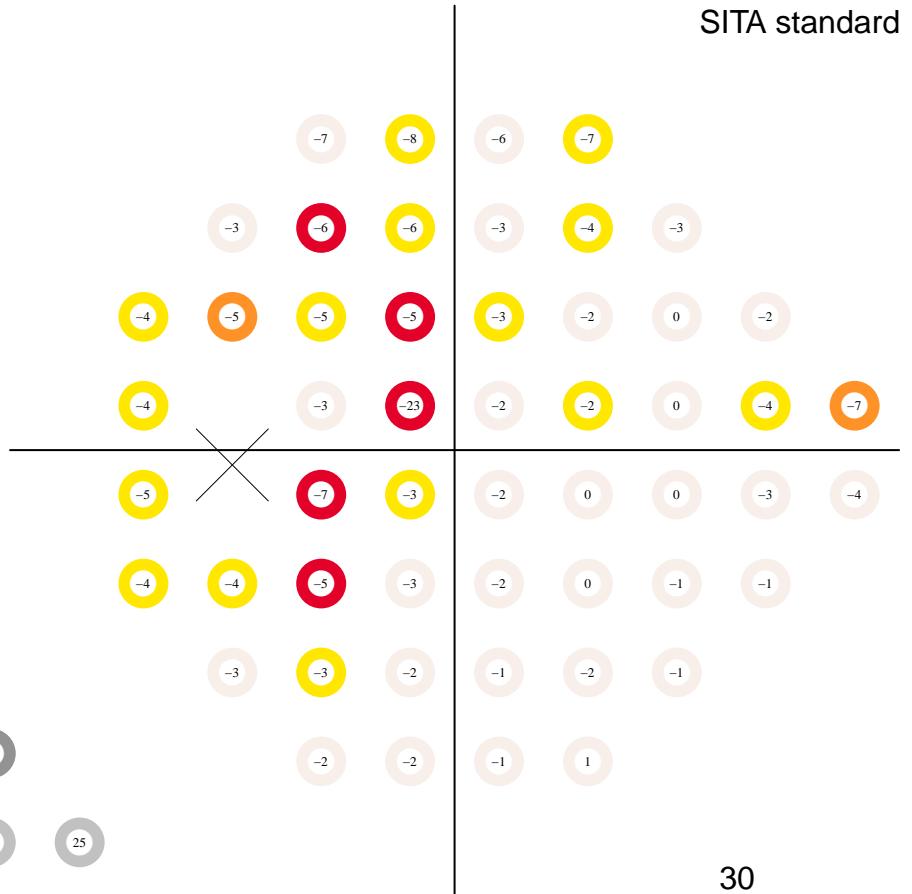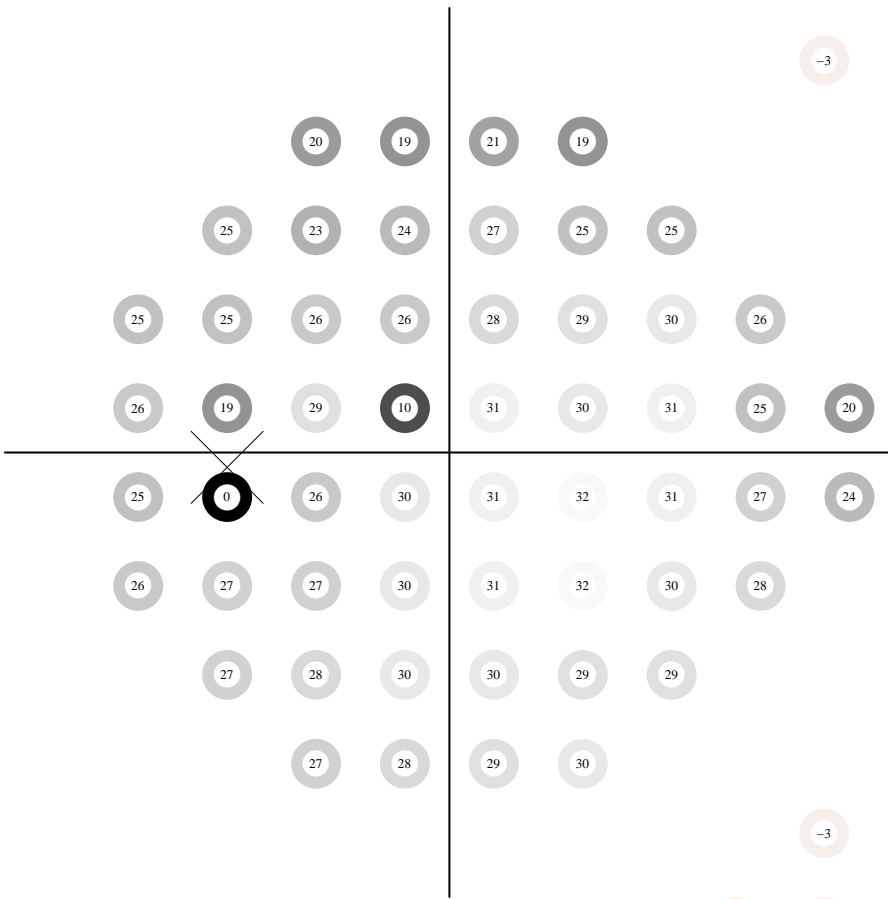

pattern deviation

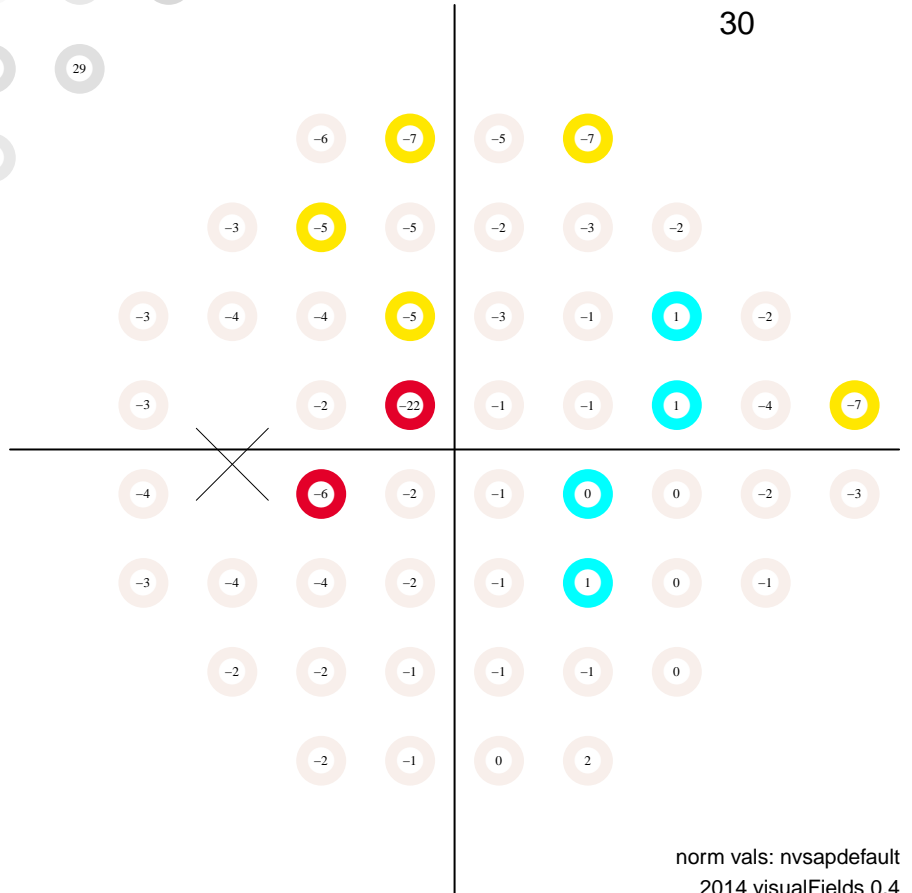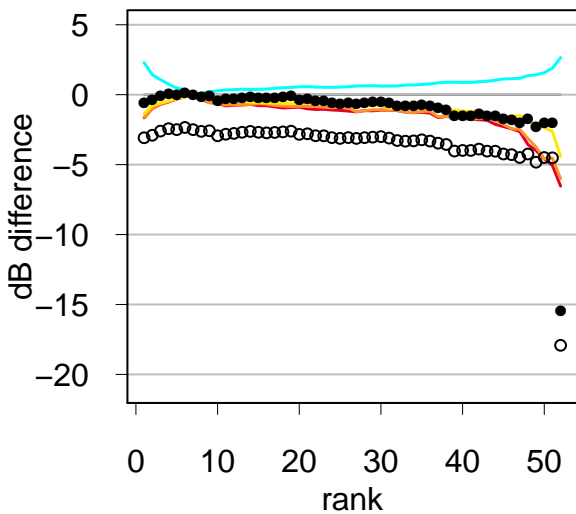





# Static Automated Perimetry. Single field analysis

Subject ID: 1023, age: 56, eye: OS (left)

Date: 07/09/2009 at 14:29

Duration: 05:20, pause: 00:00

false positives 3.0 %

false negatives 7.0 %

fixation losses 20.0 %

MS 27.4 dB

MD -3.2 dB (p < 5 %)

PSD 4.0 dB (p < 5 %)

VFI 92.5 % (p < 0.5 %)

GH 0.0 dB

total deviation

Central 24-2  
SITA standard

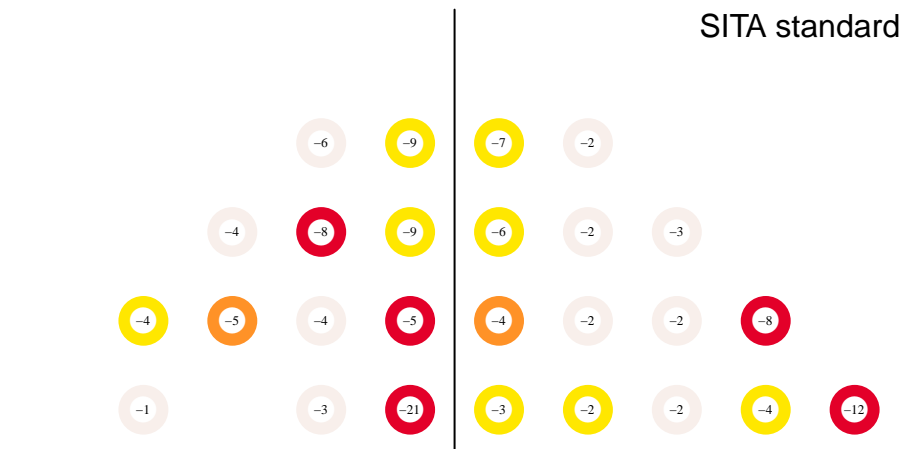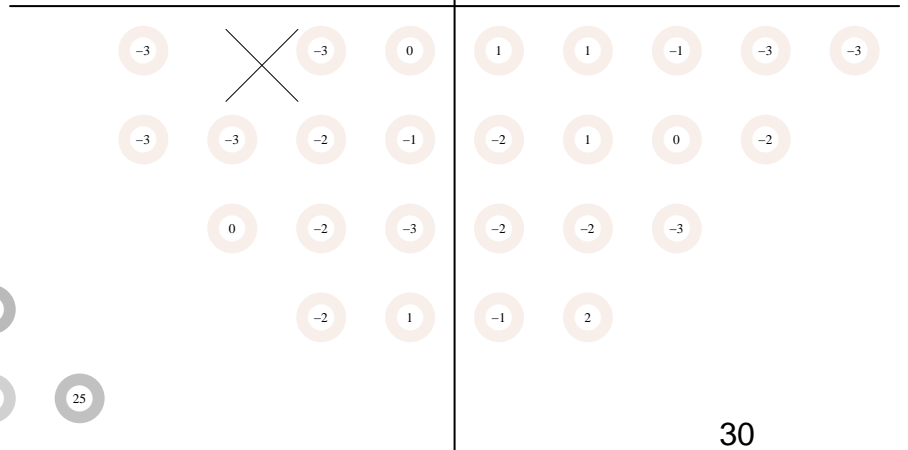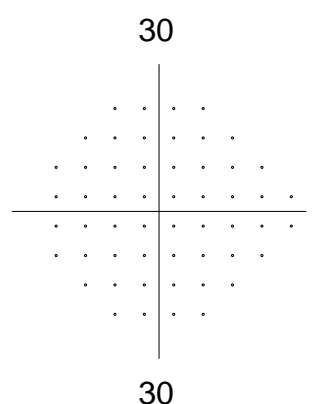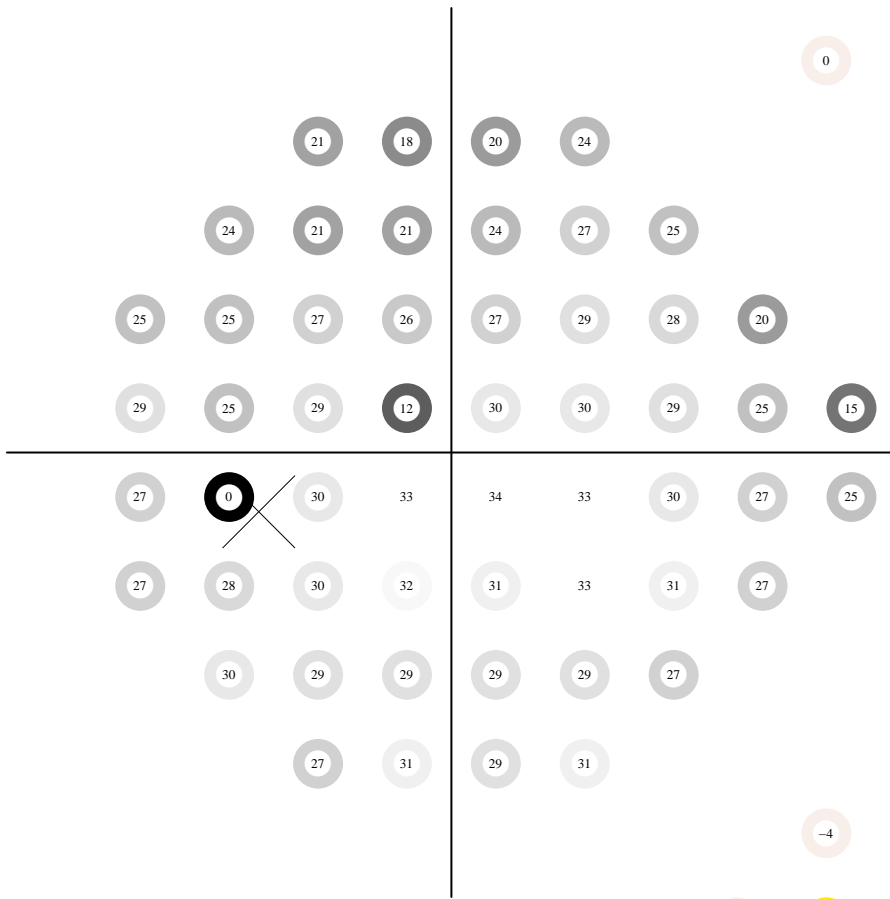

pattern deviation

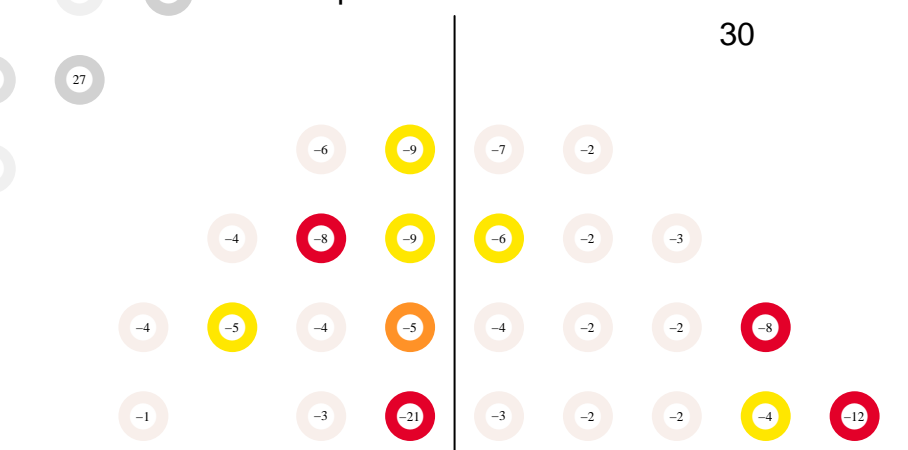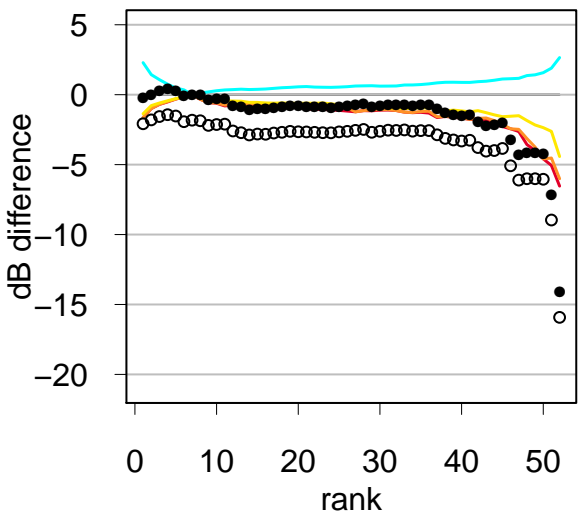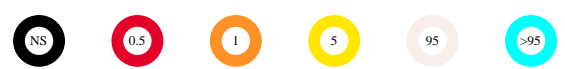

# Static Automated Perimetry. Single field analysis

Subject ID: 1023, age: 57, eye: OS (left)

Date: 08/12/2009 at 14:27

Duration: 05:36, pause: 00:00

false positives 1.0 %

false negatives 4.0 %

fixation losses 13.3 %

MS 25.9 dB

MD -4.6 dB (p < 0.5 %)

PSD 2.9 dB (p < 0.5 %)

VFI 88.5 % (p < 0.5 %)

GH -1.0 dB

total deviation

Central 24-2  
SITA standard

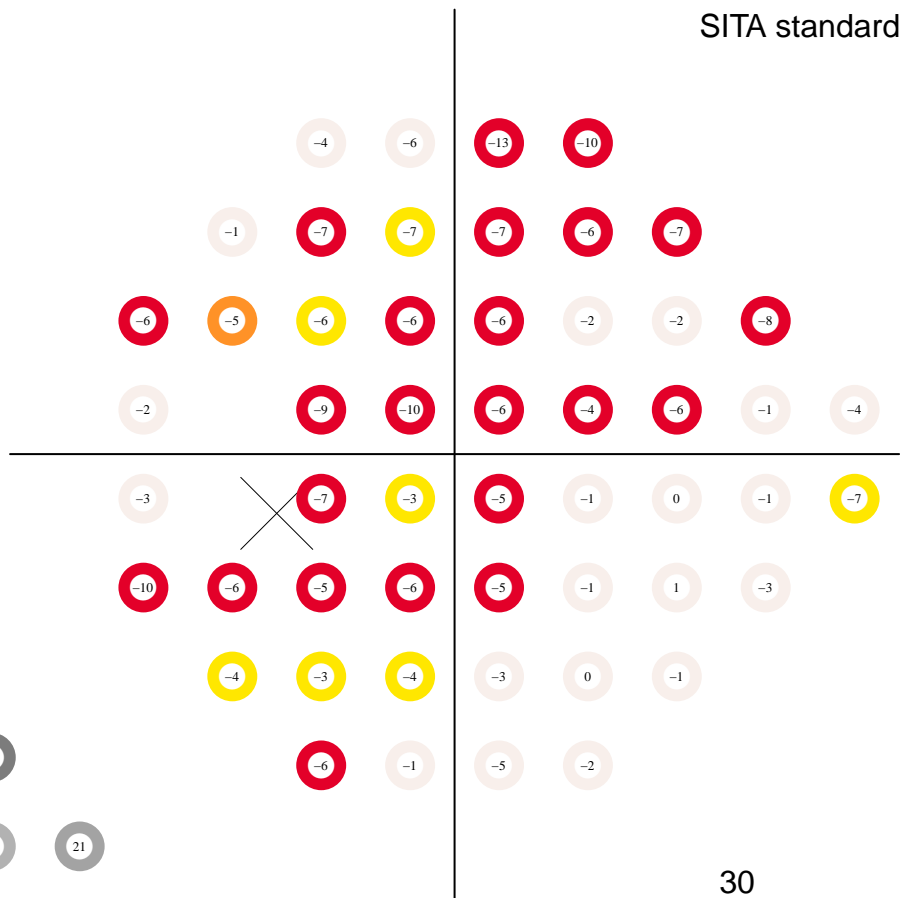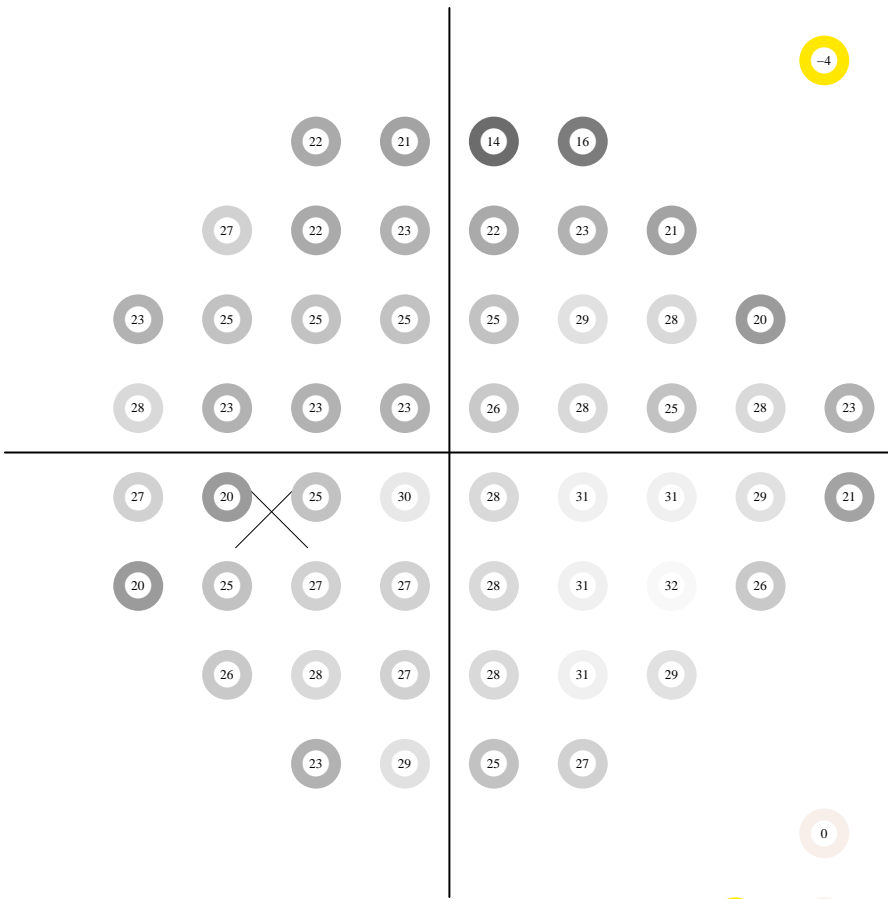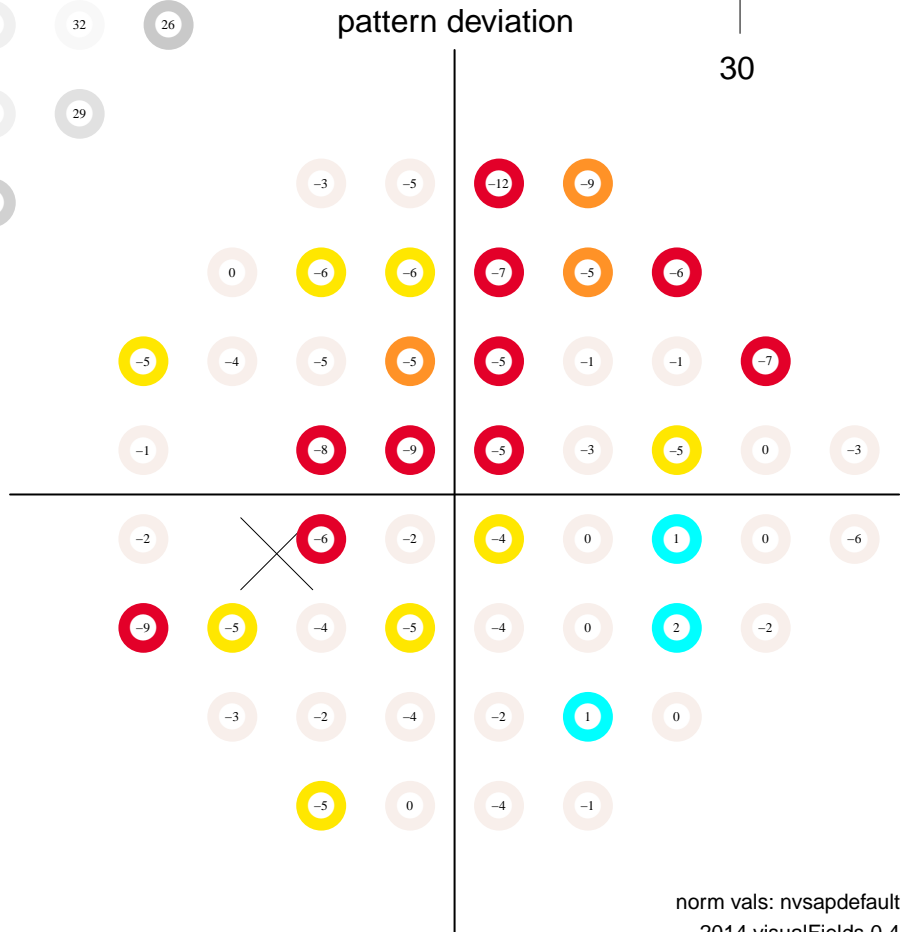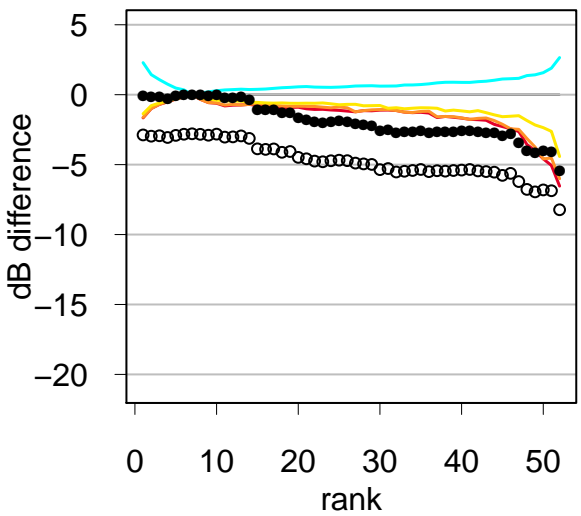

# Static Automated Perimetry. Single field analysis

Subject ID: 1023, age: 57, eye: OS (left)

Date: 08/21/2009 at 8:14:

Duration: 05:15, pause: 00:00

false positives 0.0 %

false negatives 1.0 %

fixation losses 0.0 %

MS 27.8 dB

MD -2.7 dB (p < 5 %)

PSD 3.2 dB (p < 5 %)

VFI 94.5 % (p < 0.5 %)

GH -0.4 dB

total deviation

Central 24-2  
SITA standard

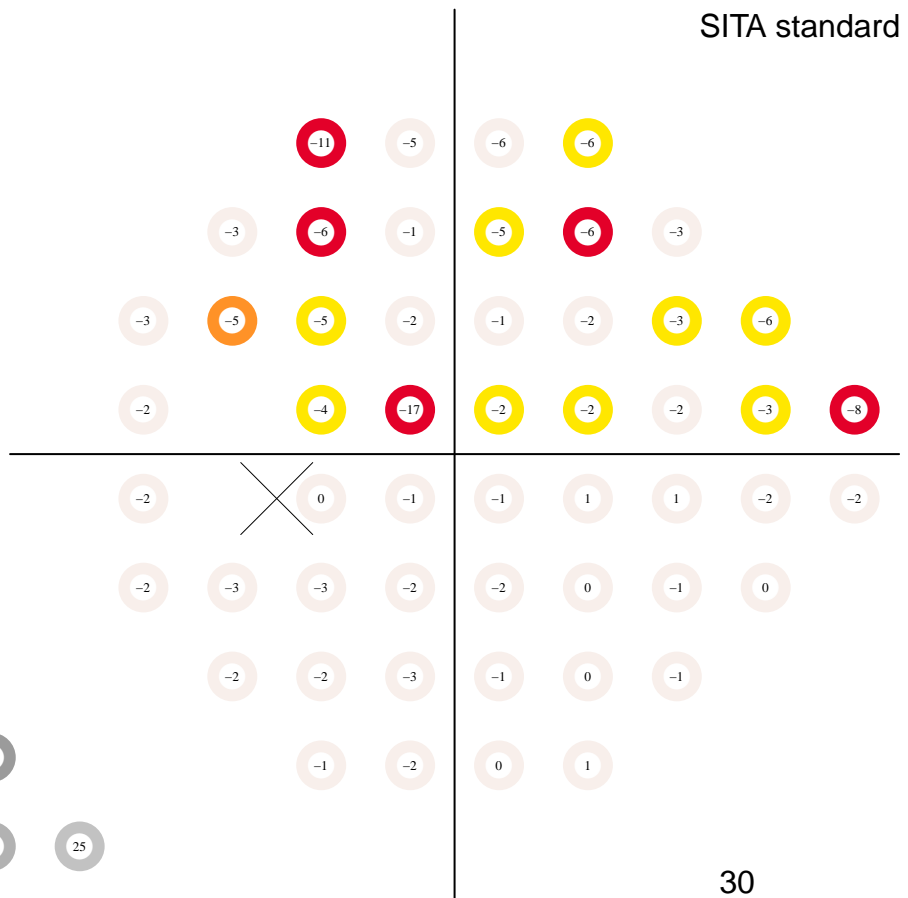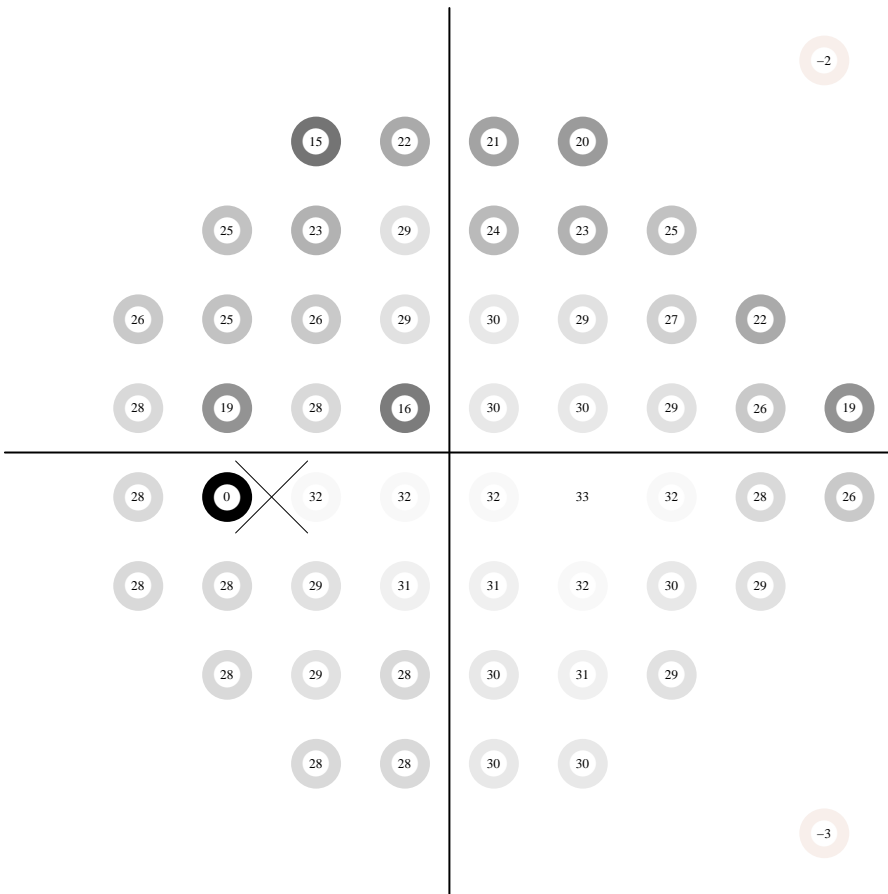

pattern deviation

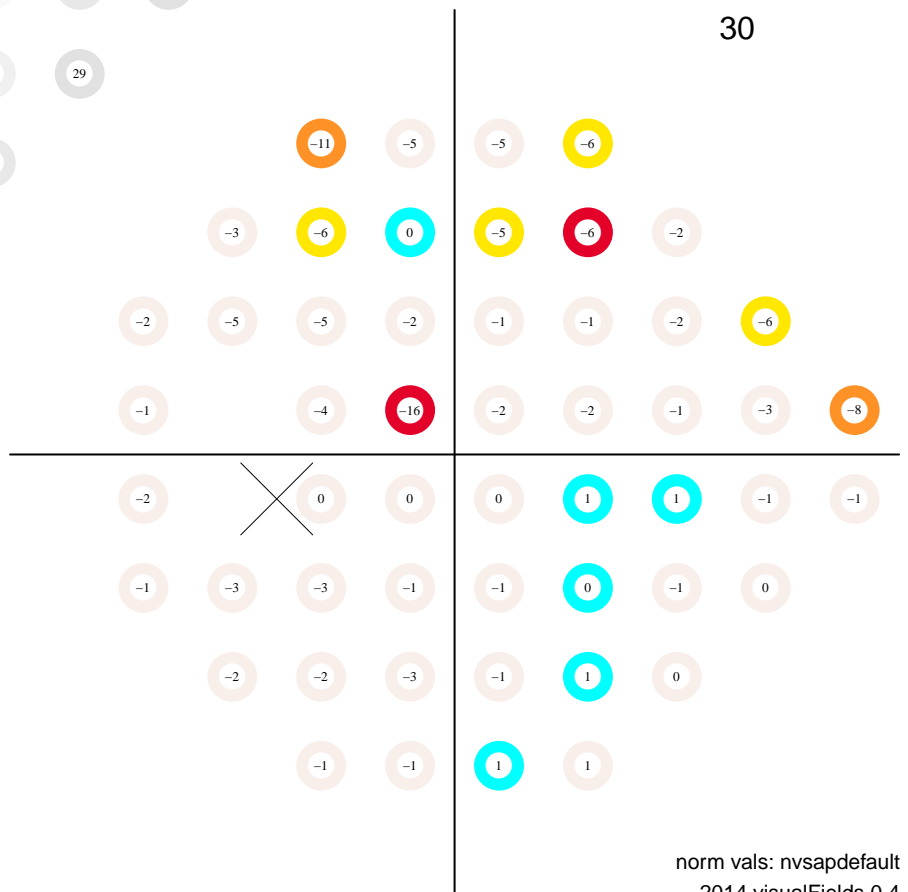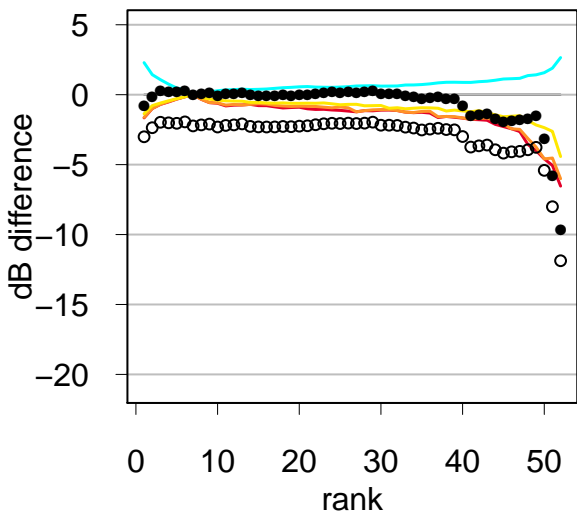



# Static Automated Perimetry. Single field analysis

Subject ID: 1023, age: 58, eye: OS (left)

Date: 03/09/2011 at 10:41

Duration: 05:26, pause: 00:00

false positives 0.0 %

false negatives 0.0 %

fixation losses 14.3 %

MS 26.4 dB

MD -4.1 dB (p < 0.5 %)

PSD 3.4 dB (p < 0.5 %)

VFI 94.5 % (p < 0.5 %)

GH -1.7 dB

total deviation

Central 24-2  
SITA standard

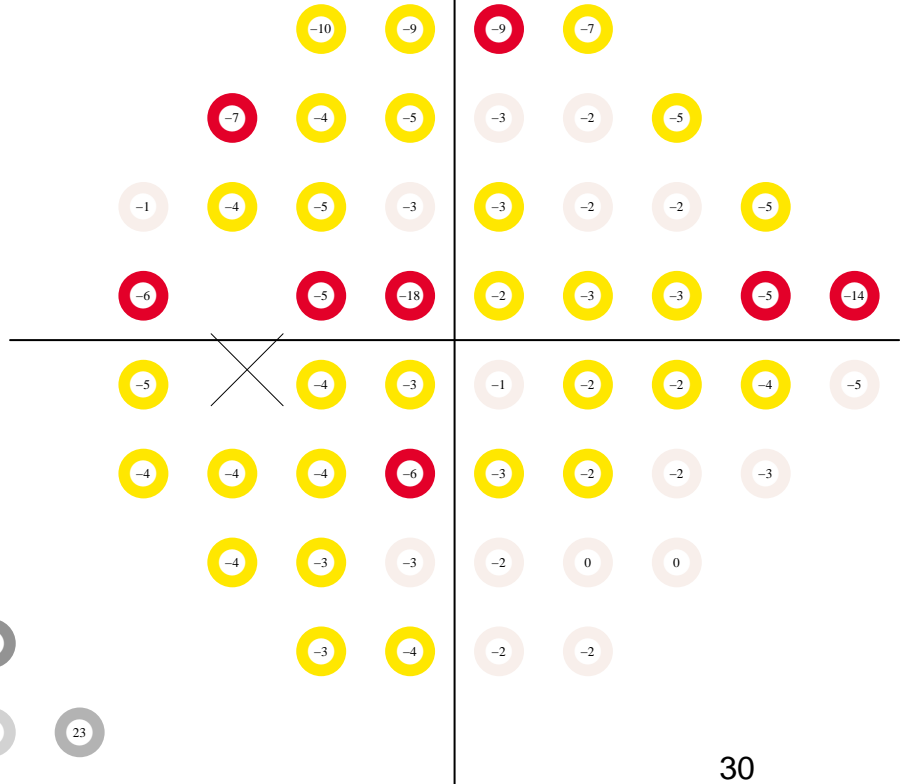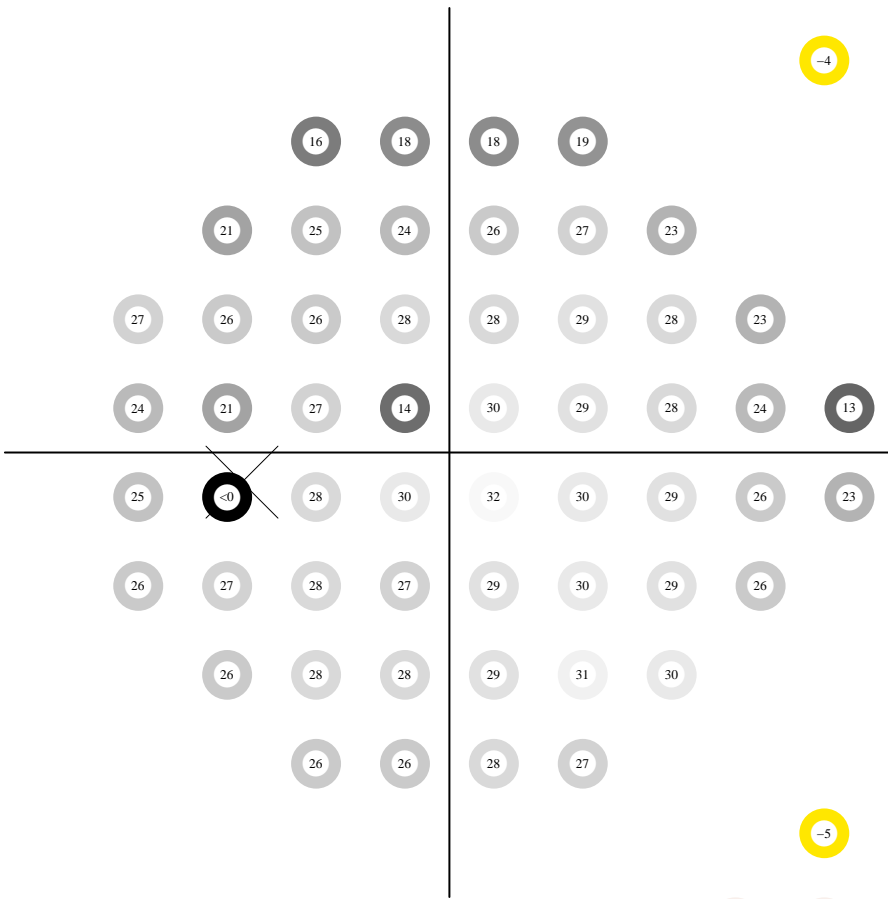

pattern deviation

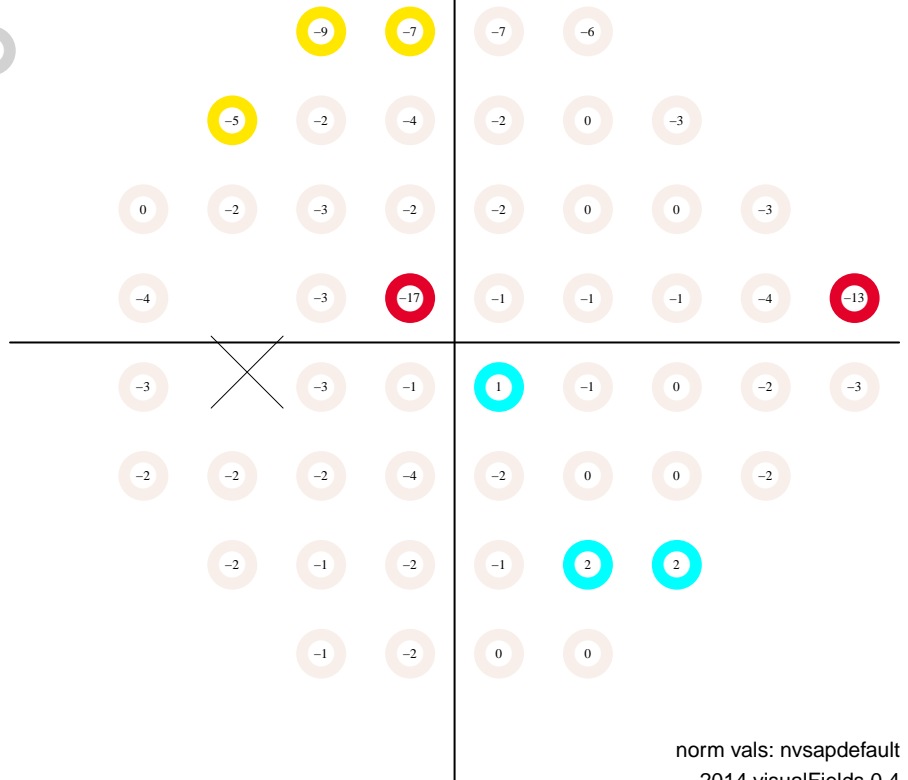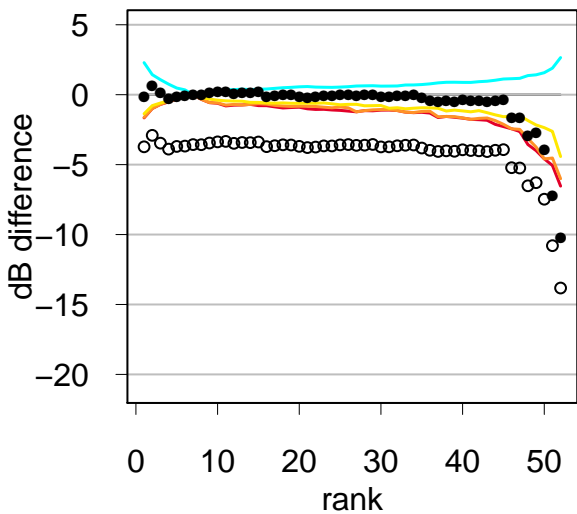

# Static Automated Perimetry. Single field analysis

Subject ID: 1023, age: 59, eye: OS (left)

Date: 12/06/2011 at 14:15

Duration: 05:37, pause: 00:00

false positives 0.0 %

false negatives 5.0 %

fixation losses 7.1 %

MS 26.9 dB

MD -3.5 dB (p < 0.5 %)

PSD 2.3 dB (p < 0.5 %)

VFI 95.7 % (p < 0.5 %)

GH -1.1 dB

total deviation

Central 24-2  
SITA standard

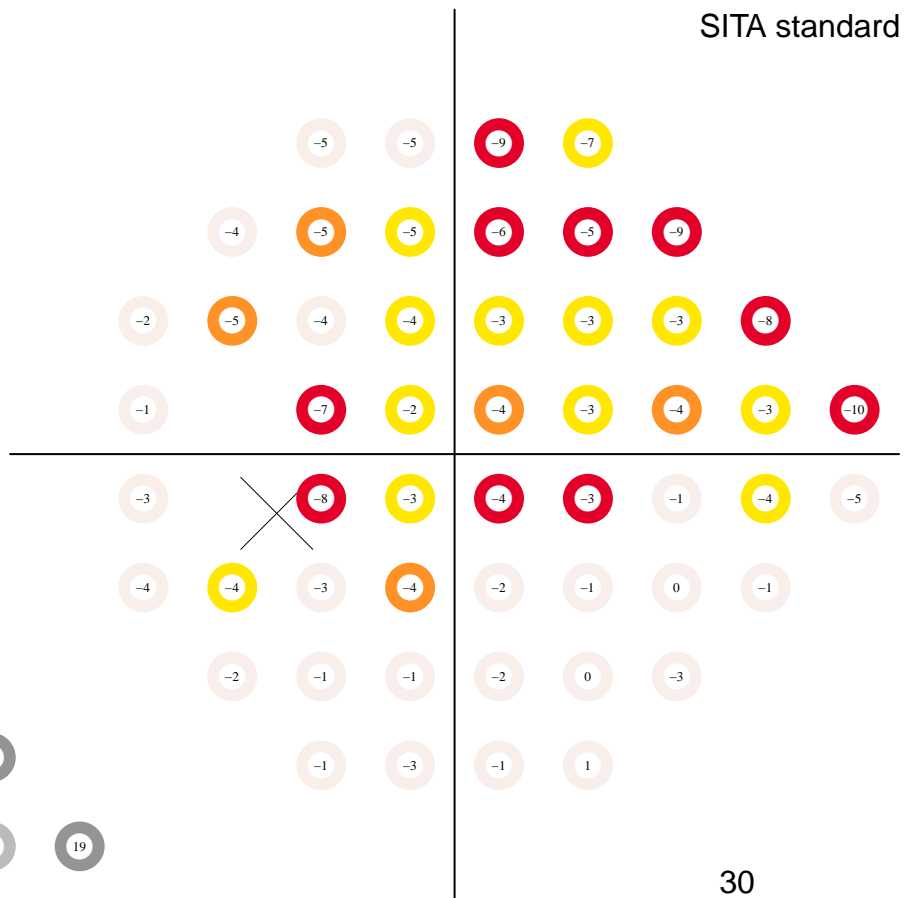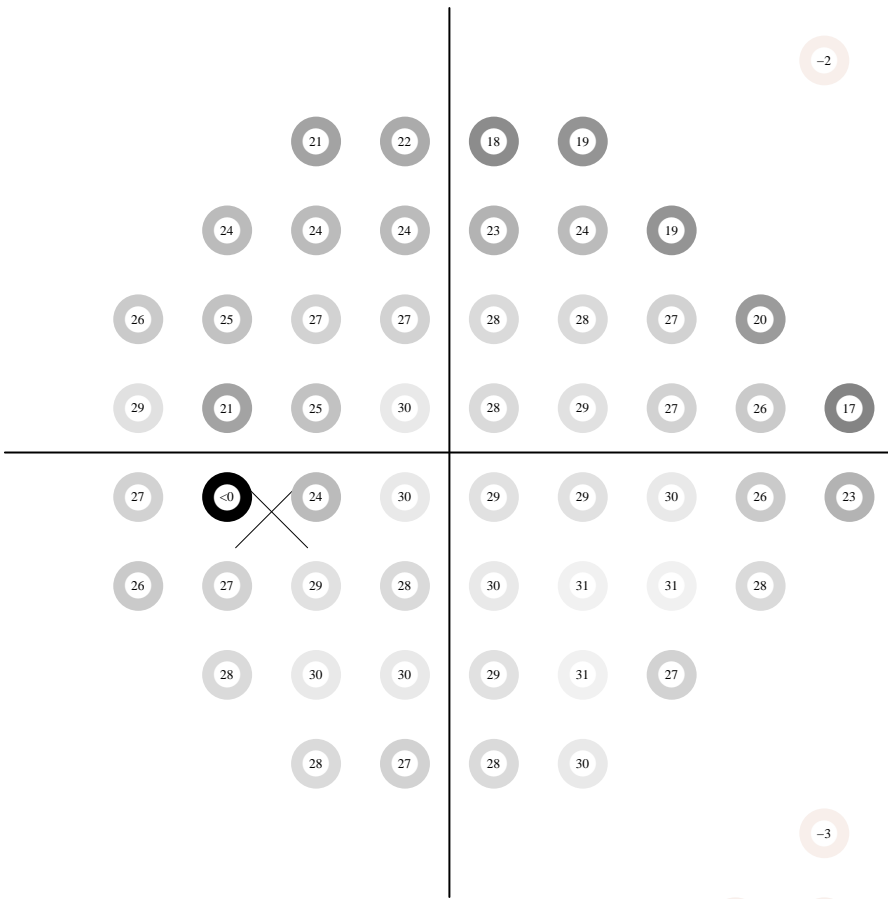

pattern deviation

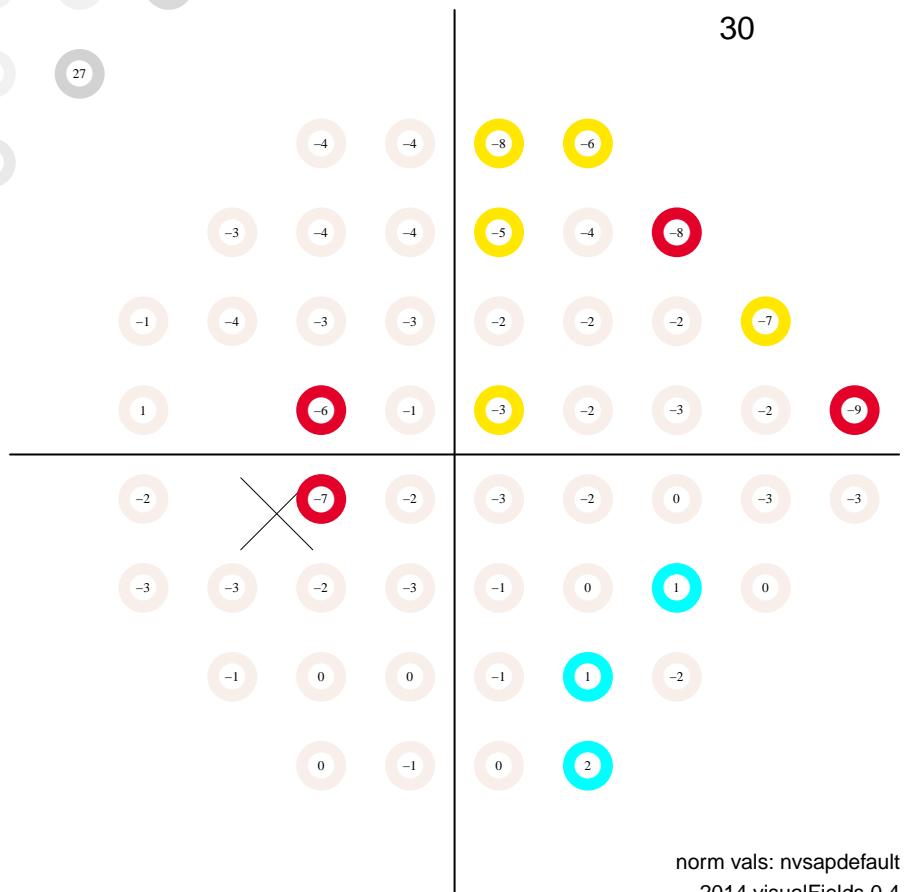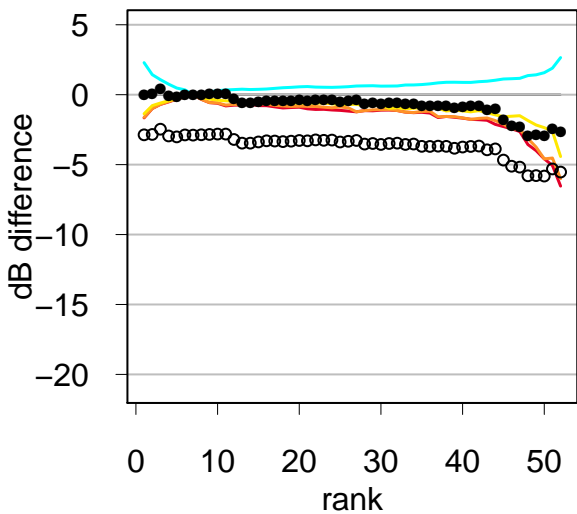

# Static Automated Perimetry. Single field analysis

Subject ID: 1023, age: 59, eye: OS (left)

Date: 03/06/2012 at 15:50

Duration: 05:19, pause: 00:00

false positives 1.0 %

false negatives 7.0 %

fixation losses 7.1 %

MS 27.2 dB

MD -3.2 dB (p < 5 %)

PSD 4.1 dB (p < 5 %)

VFI 92.8 % (p < 0.5 %)

GH -0.3 dB

total deviation

Central 24-2  
SITA standard

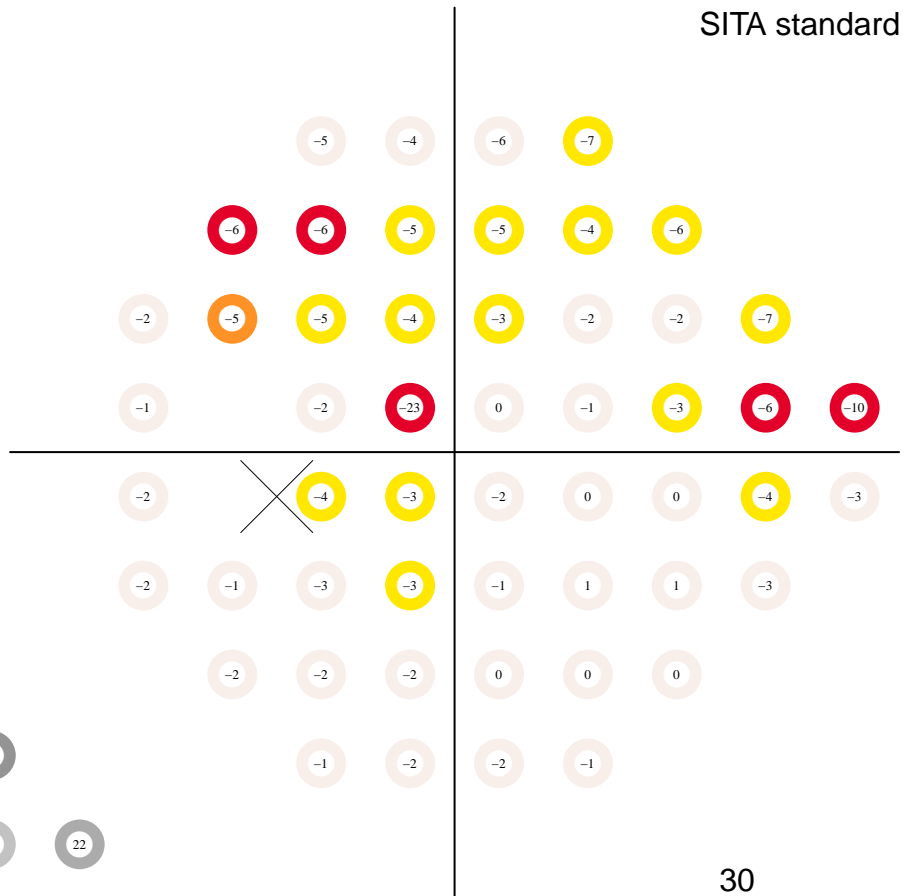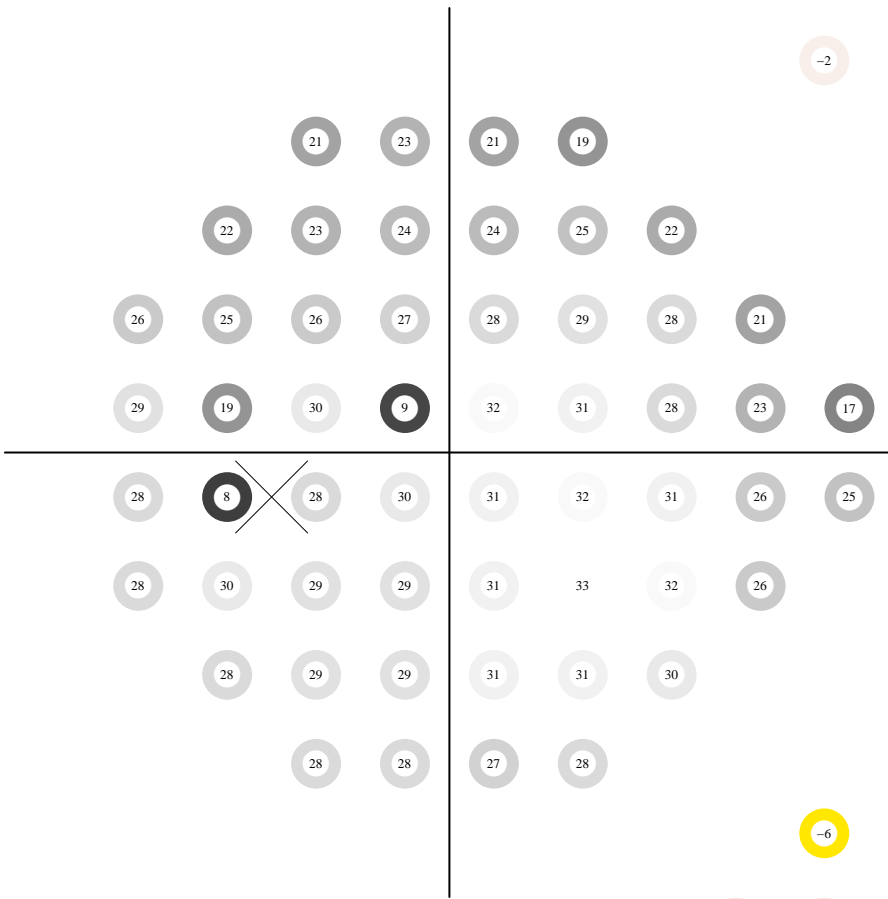

pattern deviation

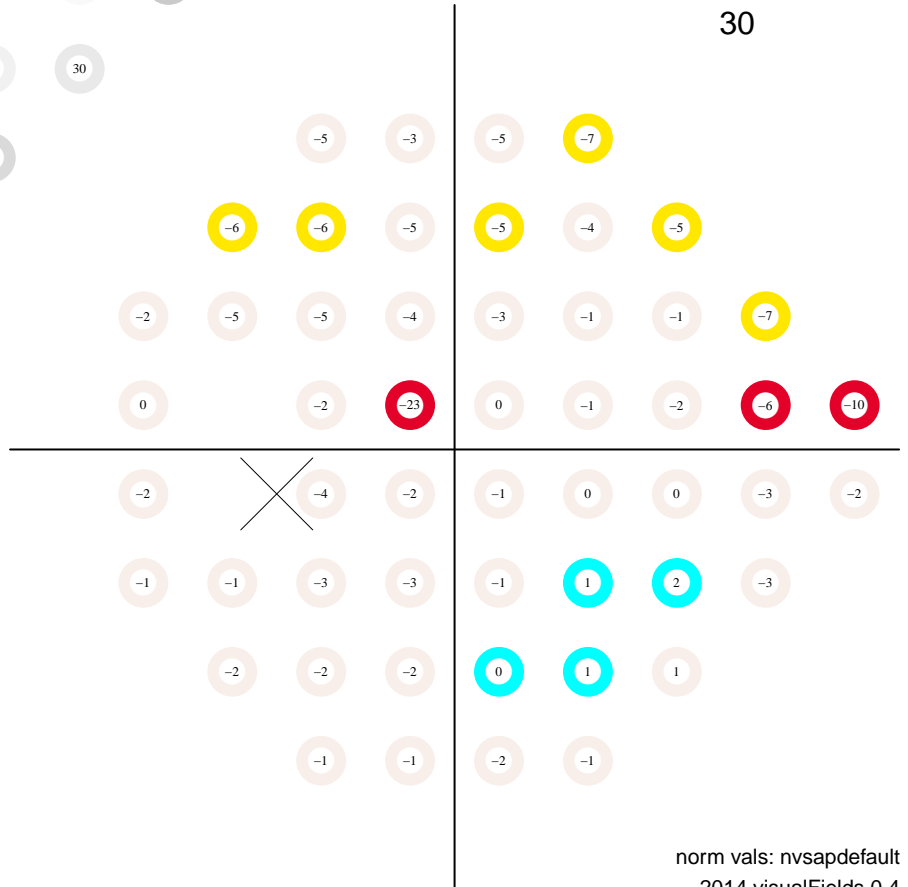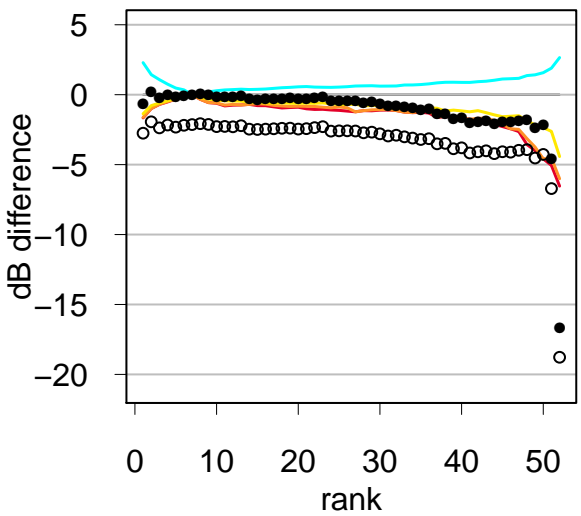



# Static Automated Perimetry. Single field analysis

Subject ID: 1023, age: 59, eye: OS (left)

Date: 04/11/2012 at 10:04

Duration: 05:53, pause: 00:00

false positives 2.0 %

false negatives 4.0 %

fixation losses 0.0 %

MS 24.7 dB

MD -5.8 dB (p < 0.5 %)

PSD 5.4 dB (p < 0.5 %)

VFI 89.0 % (p < 0.5 %)

GH -2.7 dB

total deviation

Central 24-2  
SITA standard

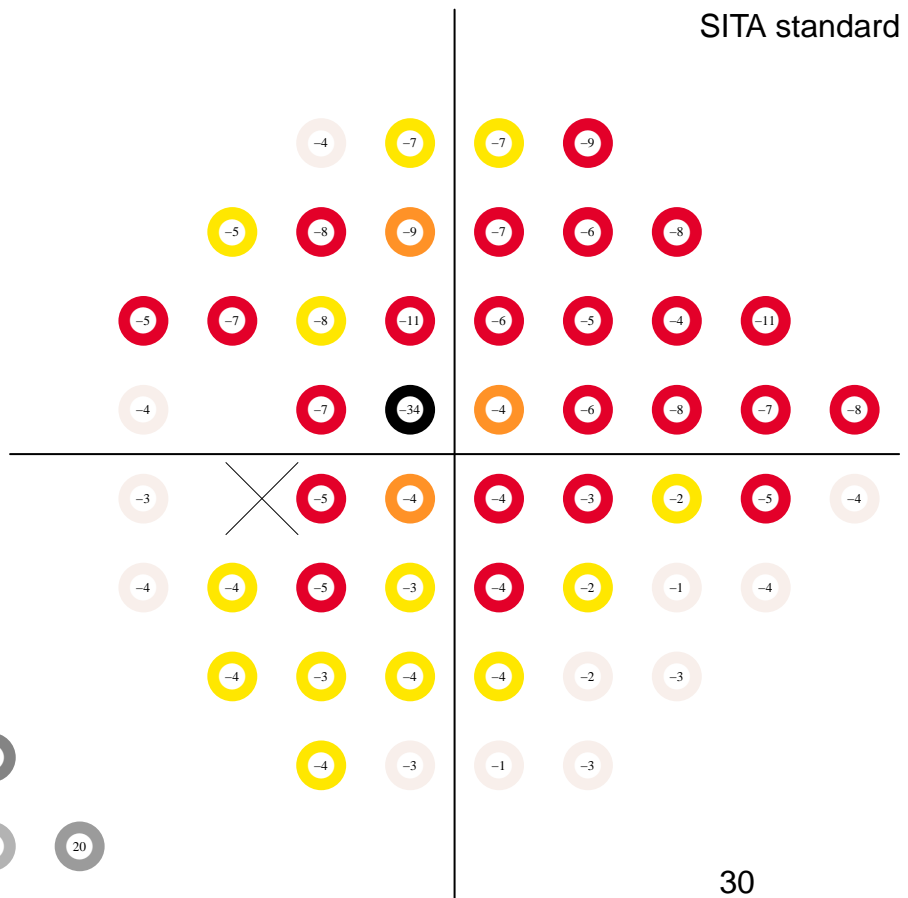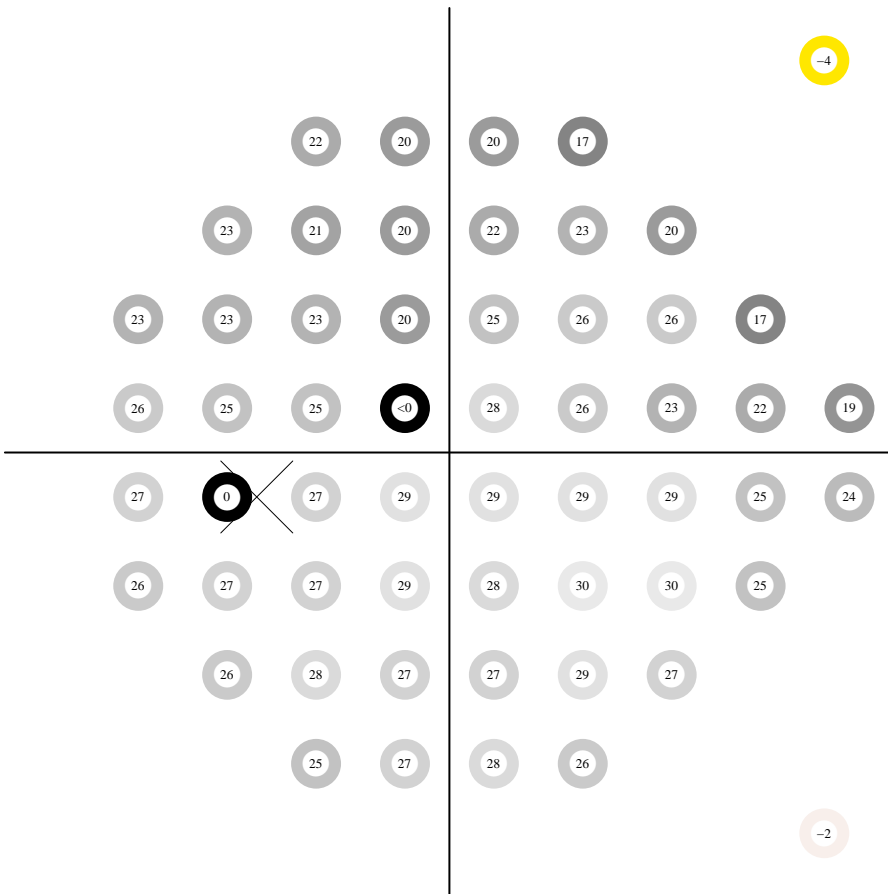

pattern deviation

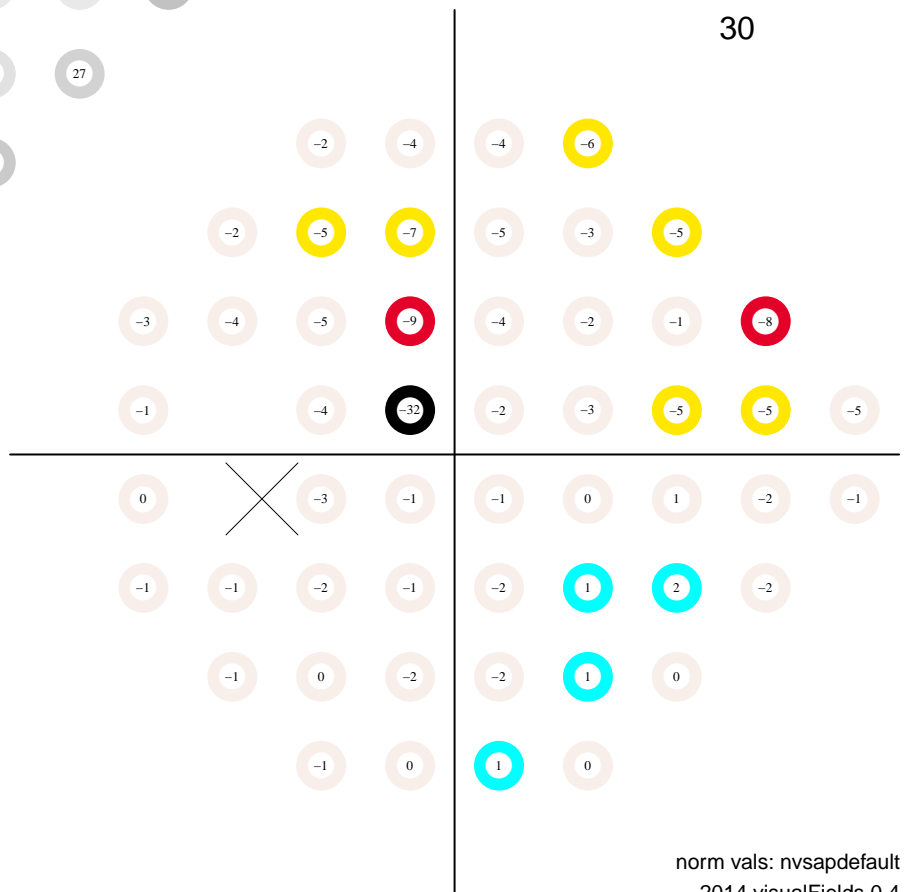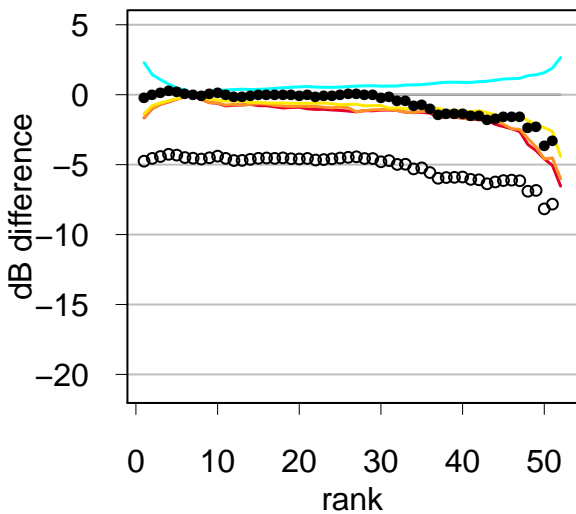

# Static Automated Perimetry. Single field analysis

Subject ID: 1023, age: 59, eye: OS (left)

Date: 06/12/2012 at 13:14

Duration: 05:40, pause: 00:00

false positives 1.0 %

false negatives 0.0 %

fixation losses 0.0 %

MS 25.4 dB

MD -5.0 dB (p < 0.5 %)

PSD 5.4 dB (p < 0.5 %)

VFI 91.2 % (p < 0.5 %)

GH -2.4 dB

total deviation

Central 24-2  
SITA standard

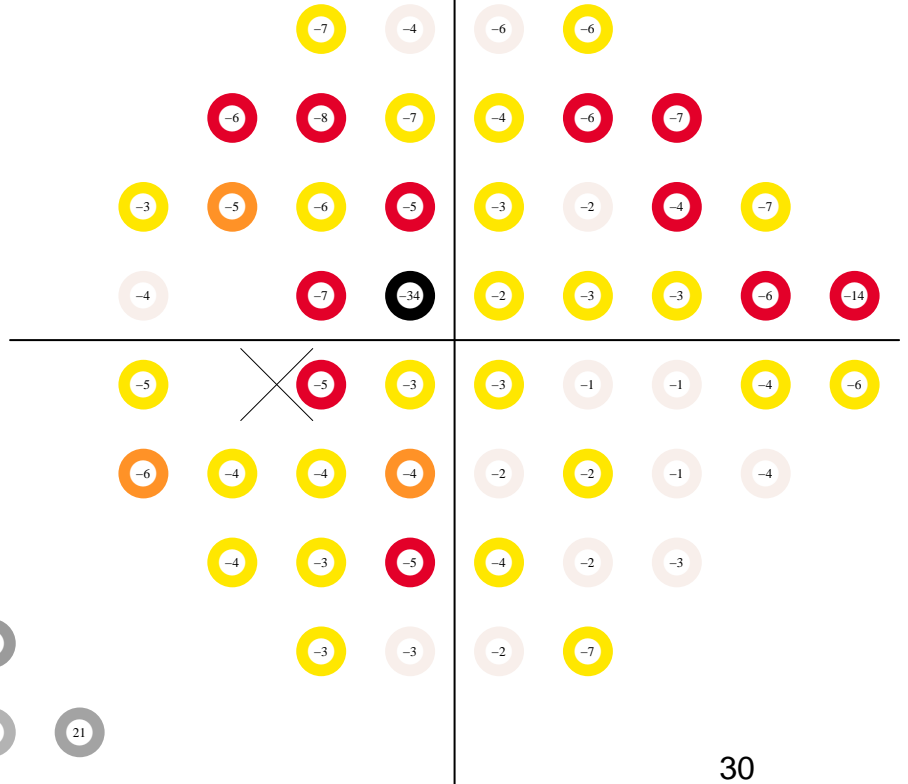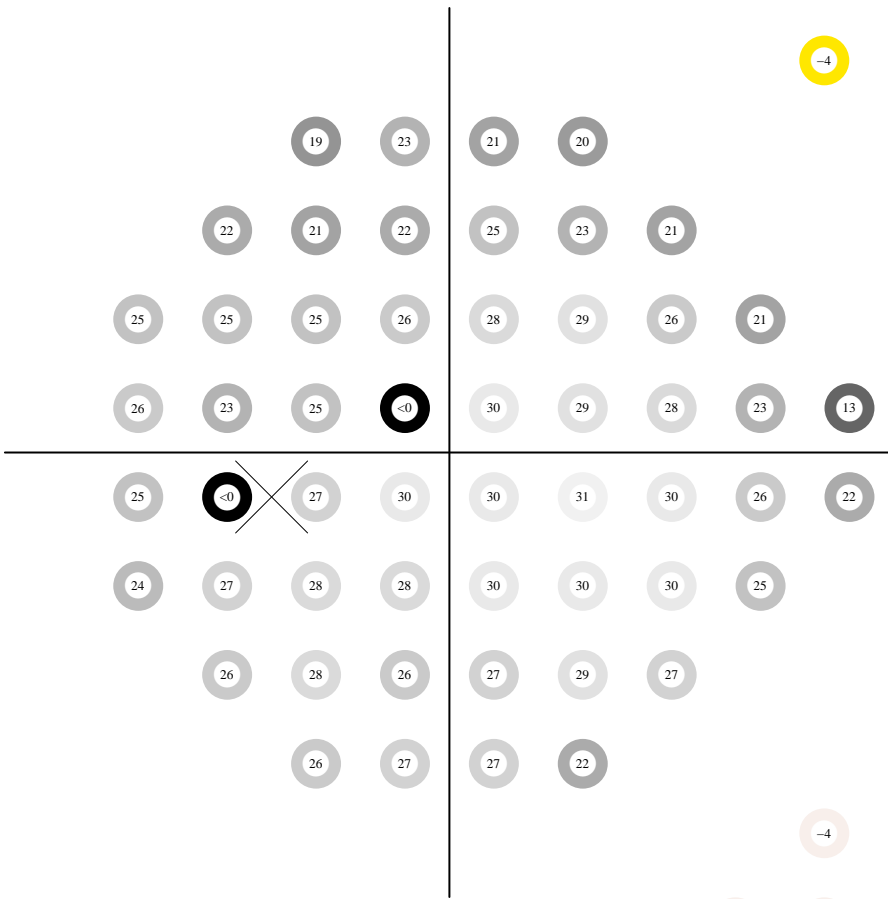

pattern deviation

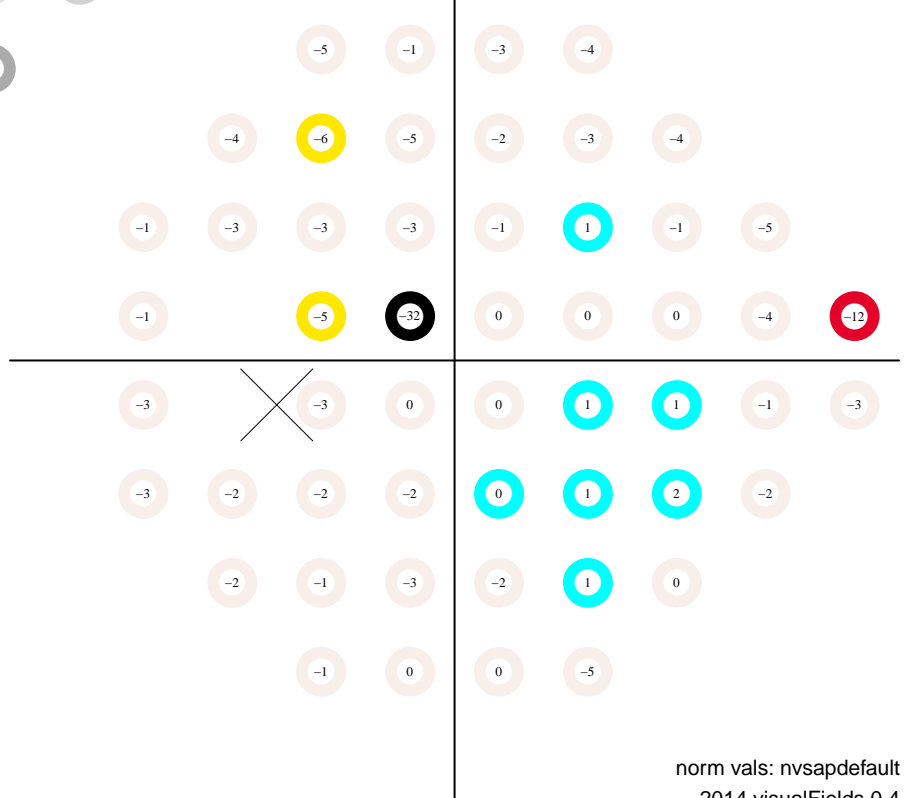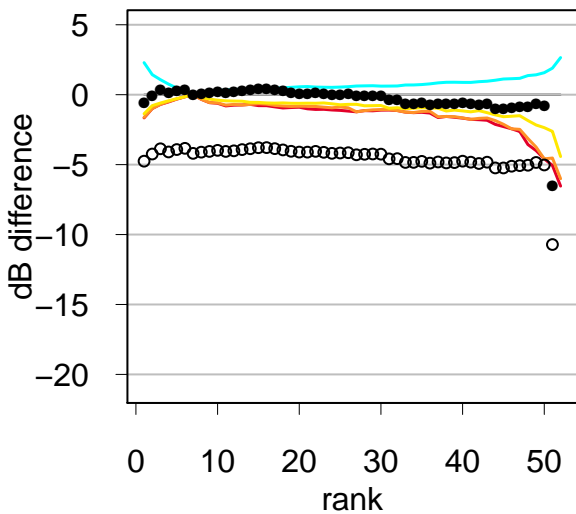

# Static Automated Perimetry. Single field analysis

Subject ID: 1023, age: 60, eye: OS (left)

Date: 10/23/2012 at 9:53:

Duration: 05:17, pause: 00:00

false positives 3.0 %

false negatives 5.0 %

fixation losses 33.3 %

MS 26.4 dB

MD -3.9 dB (p < 0.5 %)

PSD 2.9 dB (p < 0.5 %)

VFI 93.9 % (p < 0.5 %)

GH -1.6 dB

total deviation

Central 24-2  
SITA standard

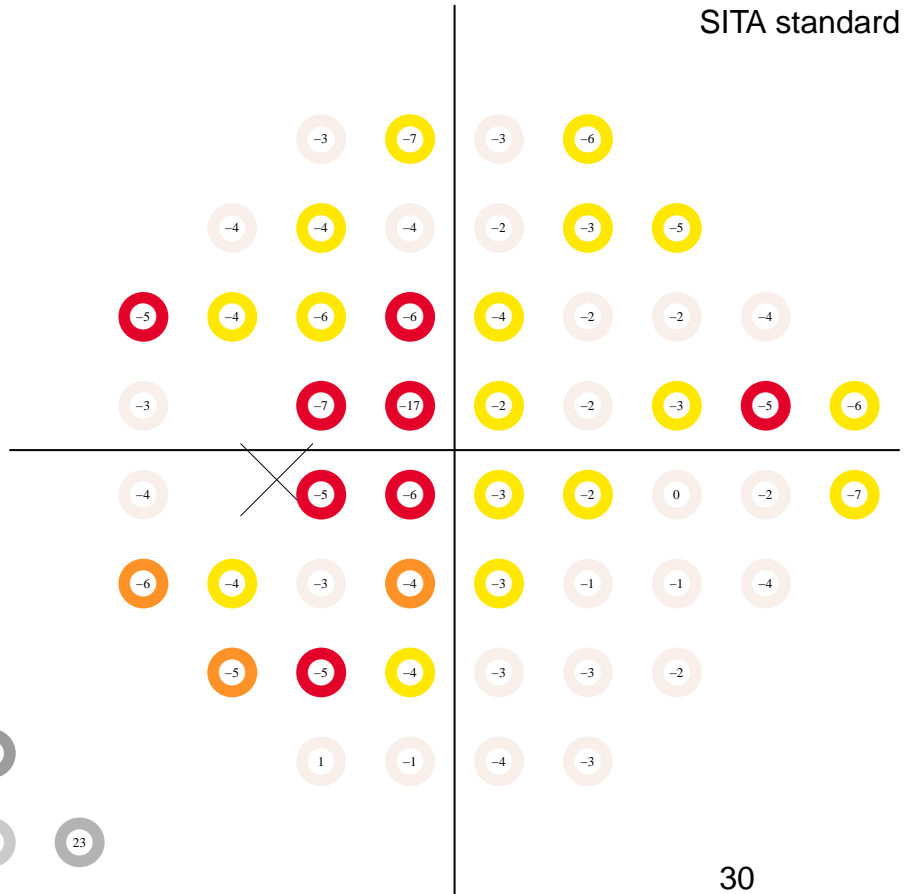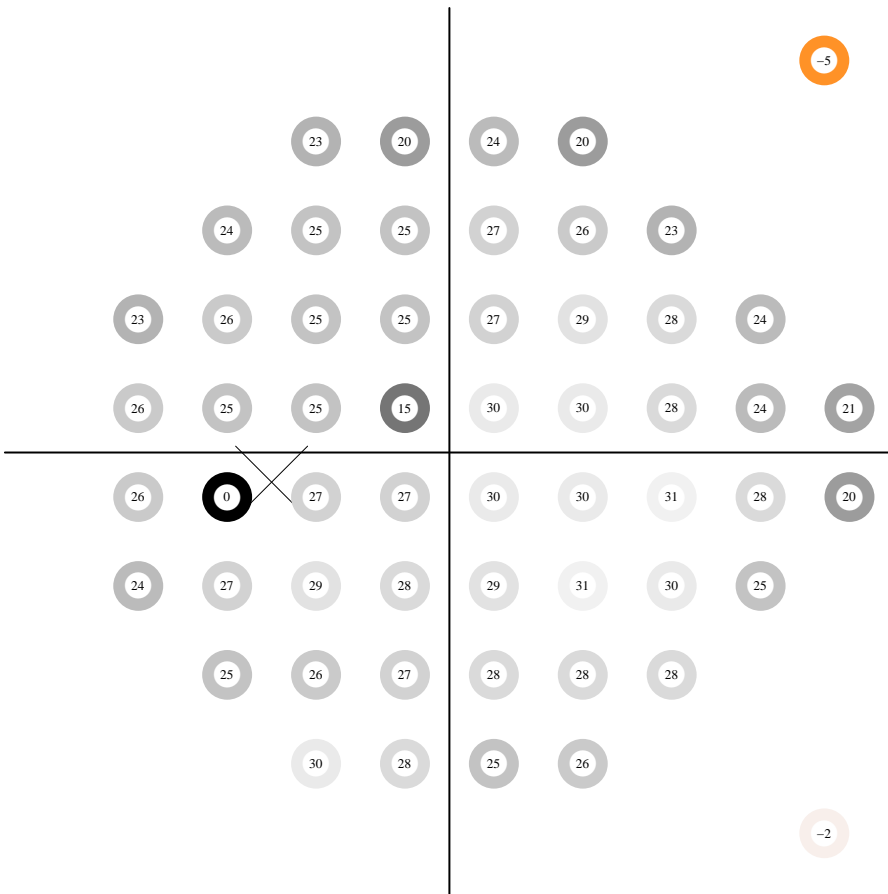

pattern deviation

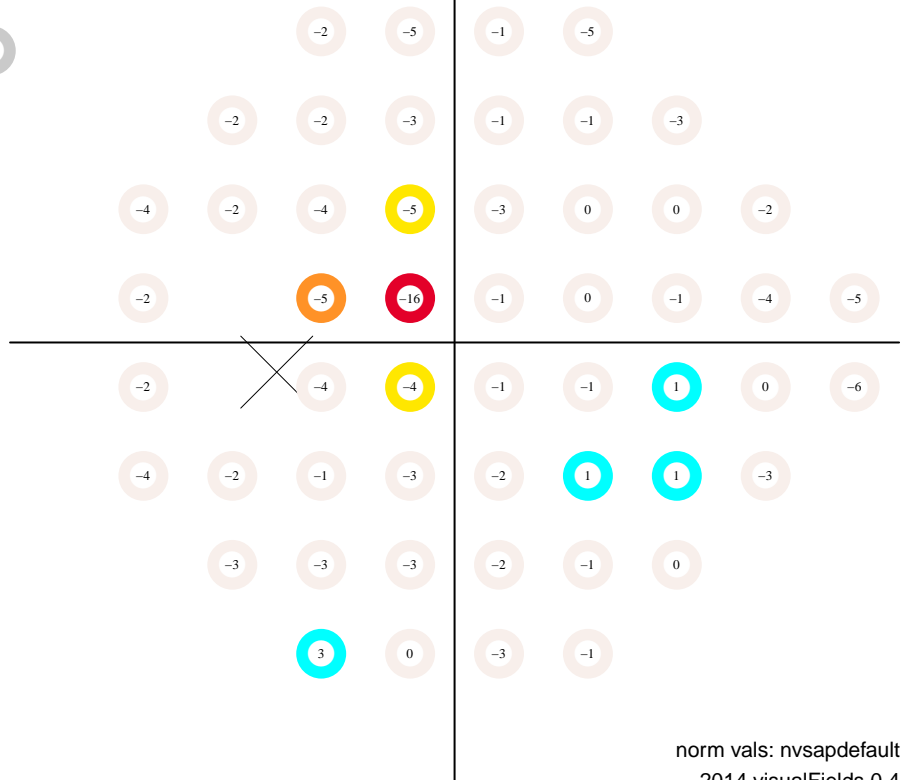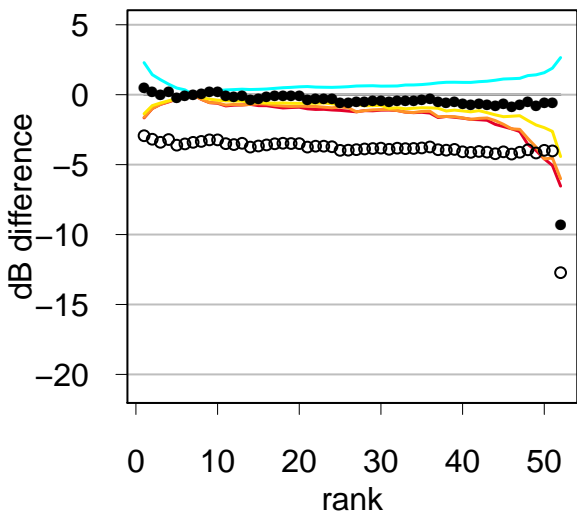

# Static Automated Perimetry. Single field analysis

Subject ID: 1023, age: 60, eye: OS (left)

Date: 01/22/2013 at 8:34:

Duration: 05:01, pause: 00:00

false positives 0.0 %

false negatives 1.0 %

fixation losses 20.0 %

MS 26.1 dB

MD -4.3 dB (p < 0.5 %)

PSD 5.4 dB (p < 0.5 %)

VFI 89.9 % (p < 0.5 %)

GH -1.0 dB

total deviation

Central 24-2  
SITA standard

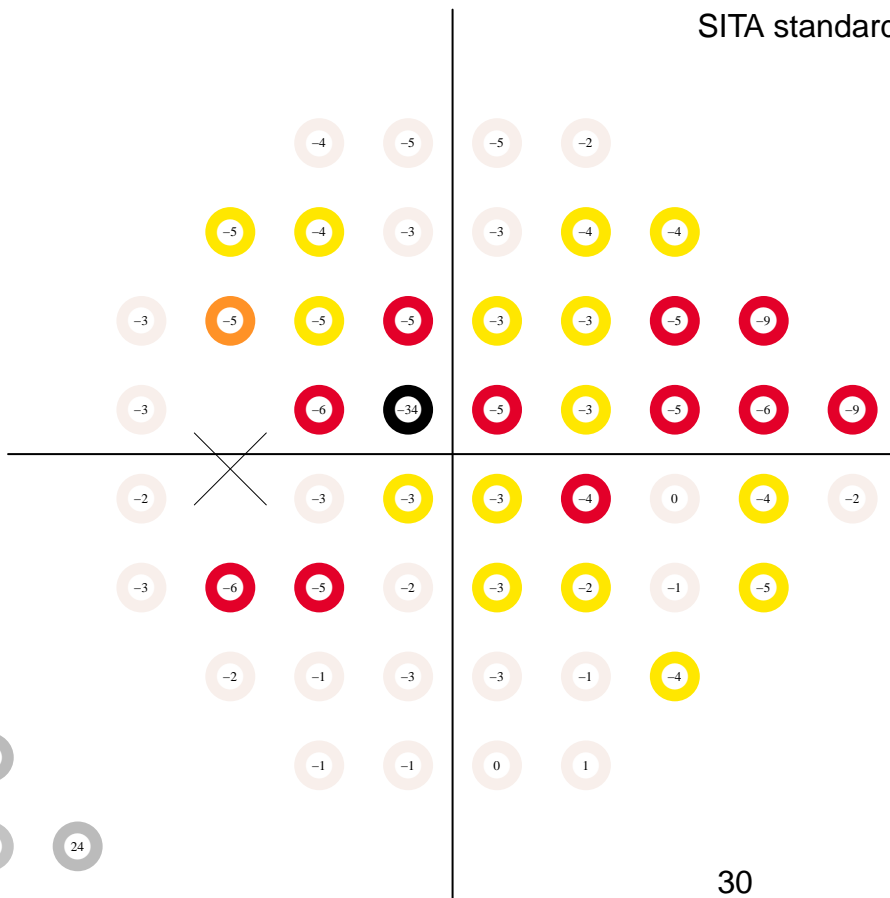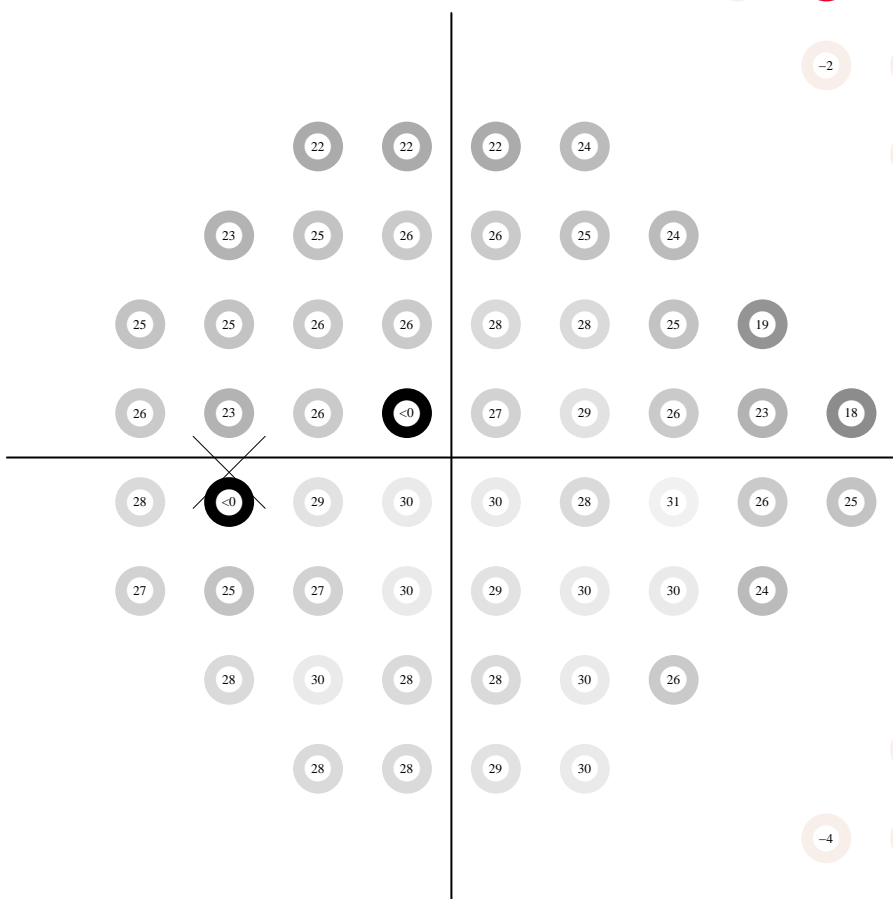

pattern deviation

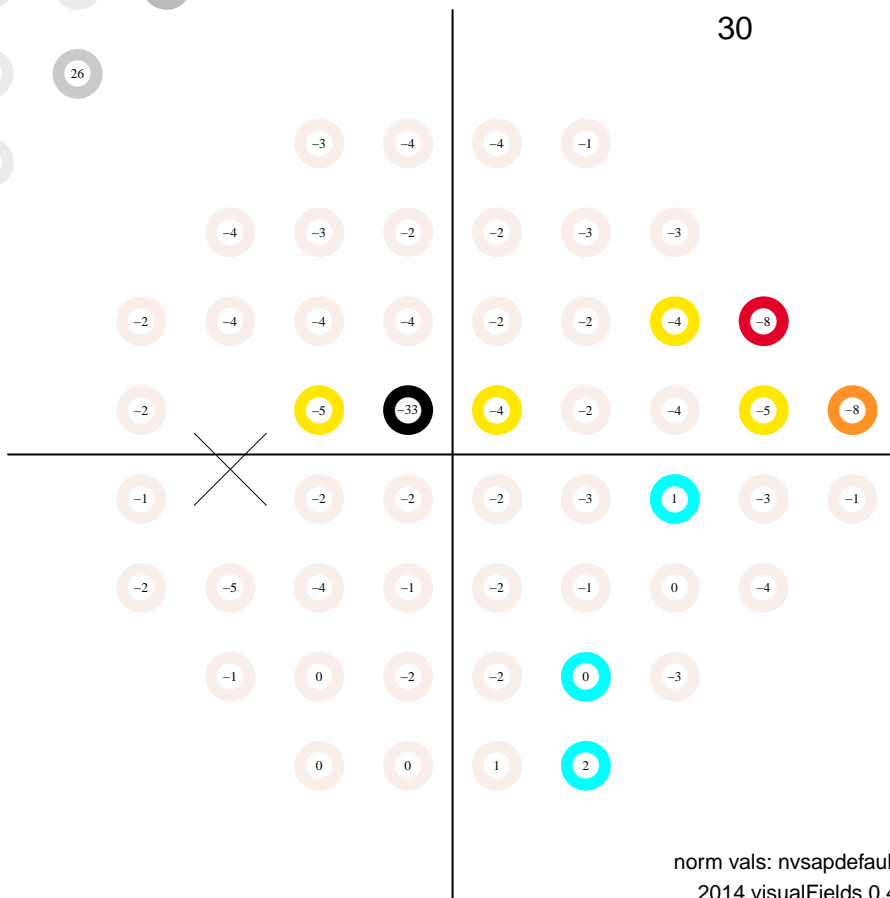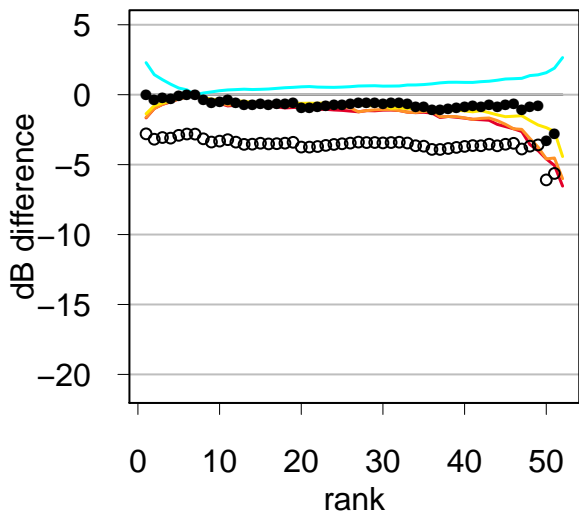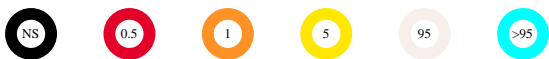

# Static Automated Perimetry. Single field analysis

Subject ID: 1023, age: 60, eye: OS (left)

Date: 05/07/2013 at 10:29

Duration: 05:39, pause: 00:00

false positives 0.0 %

false negatives 9.0 %

fixation losses 62.5 %

MS 25.8 dB

MD -4.6 dB (p < 0.5 %)

PSD 4.5 dB (p < 0.5 %)

VFI 93.2 % (p < 0.5 %)

GH -1.4 dB

total deviation

Central 24-2  
SITA standard

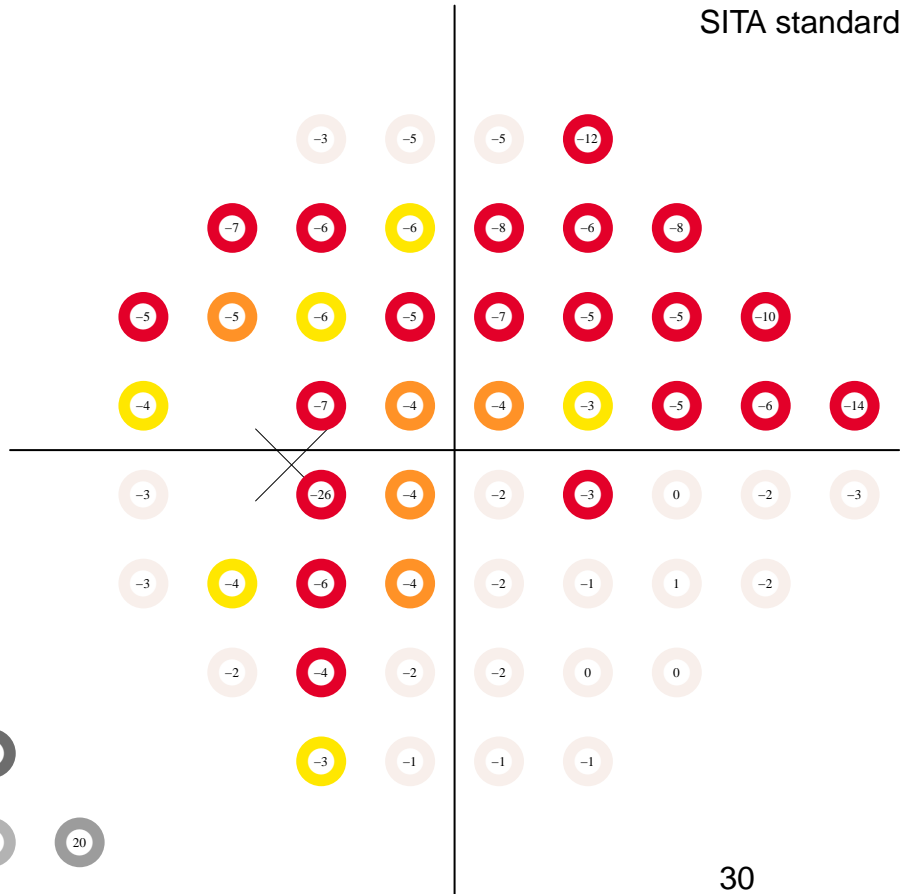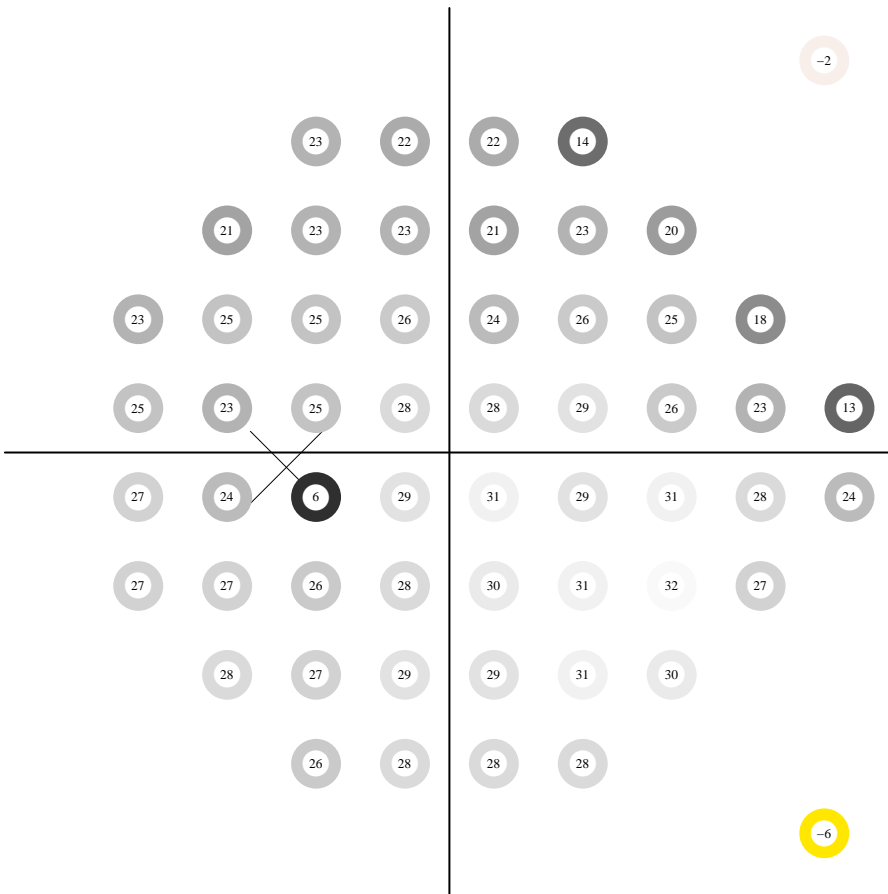

pattern deviation

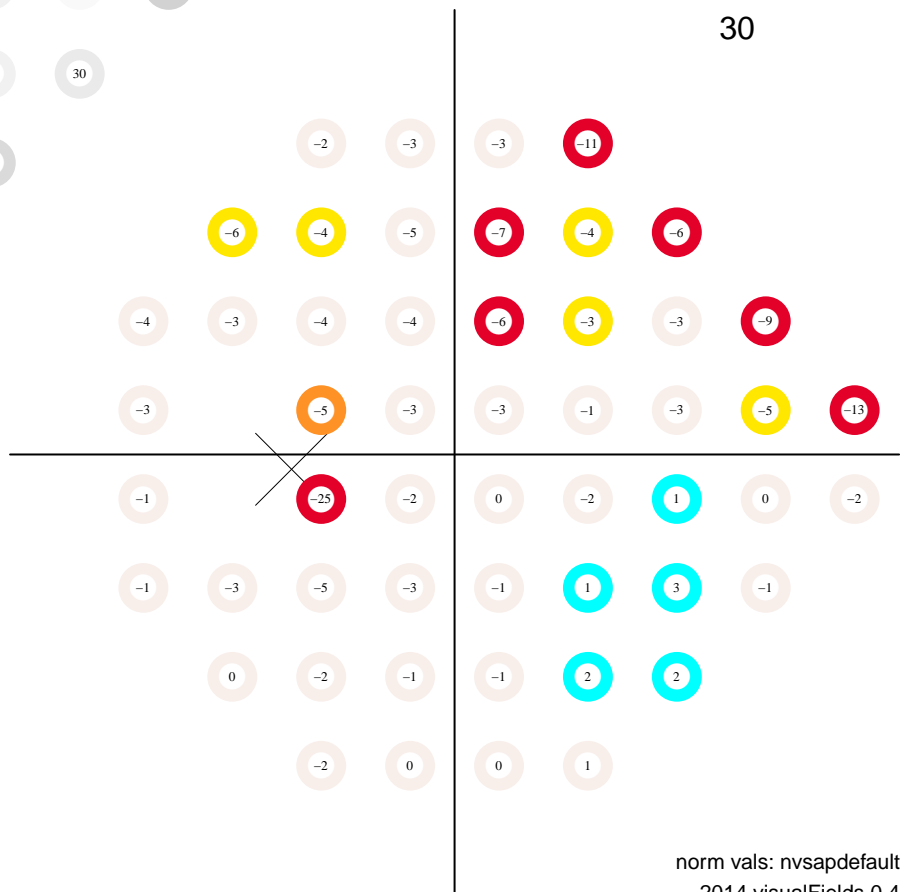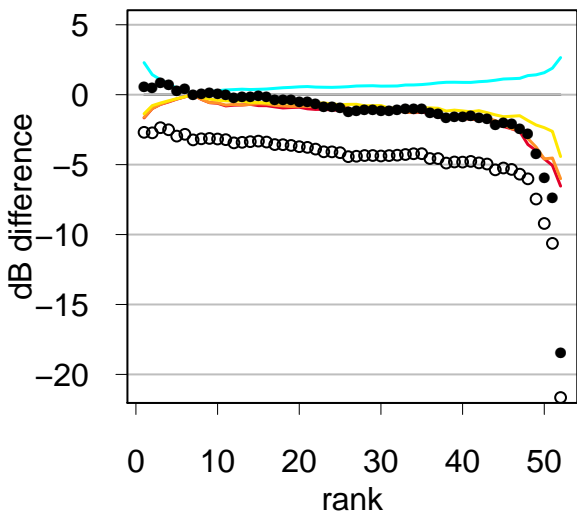

Static Automated Perimetry. Single field analysis

Subject ID: 1029, age: 43, eye: OS (left)

Date: 07/25/2002 at 16:07

Duration: 05:05, pause: 00:00

false positives 1.0 %

false negatives 3.0 %

fixation losses 13.3 %

MS 29.0 dB

MD -2.3 dB (p < 95 %)

PSD 2.4 dB (p < 95 %)

VFI 98.8 % (p < 95 %)

GH -0.1 dB

total deviation

Central 24-2  
SITA standard

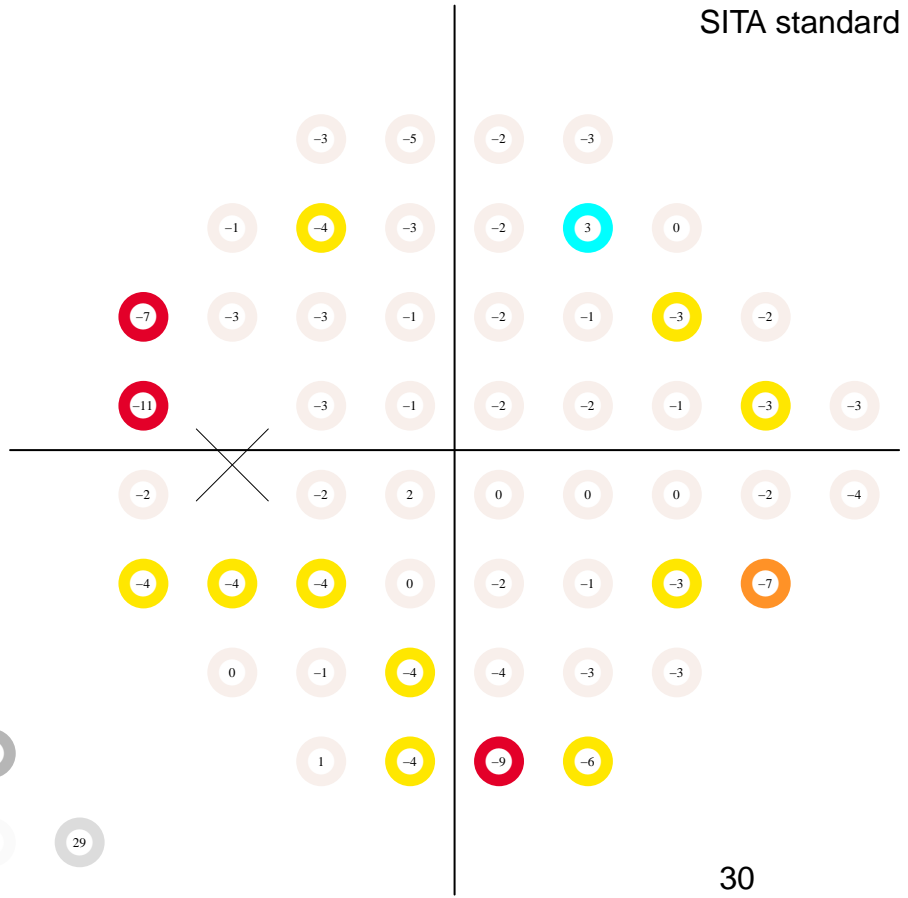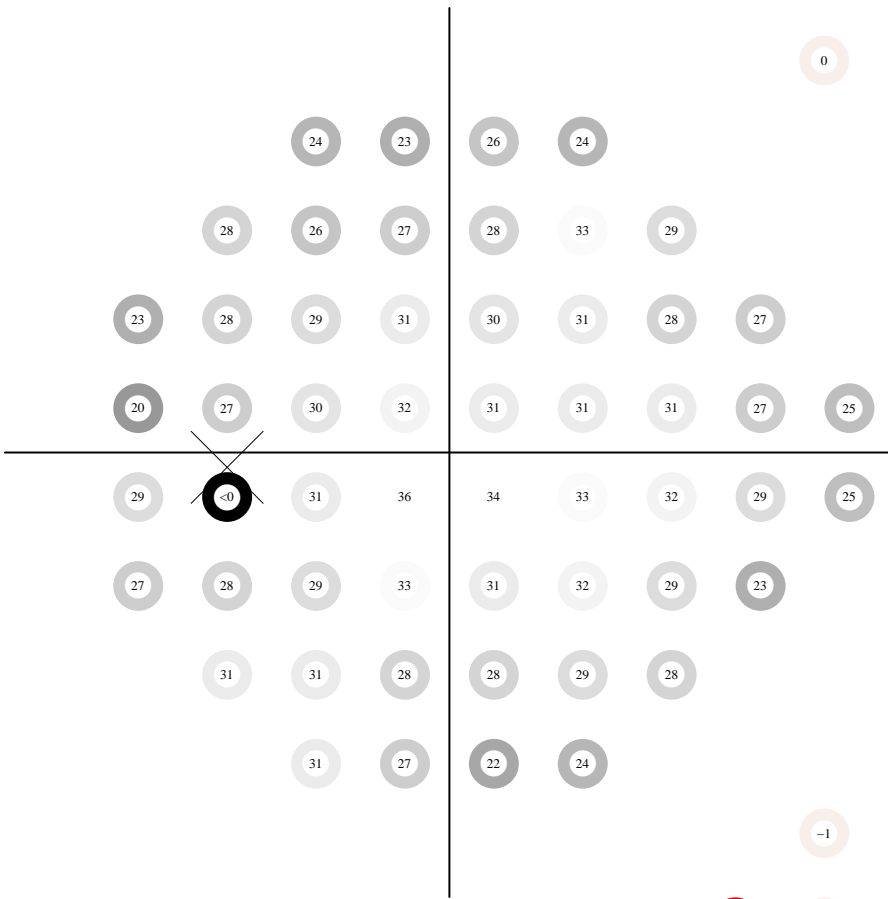

pattern deviation

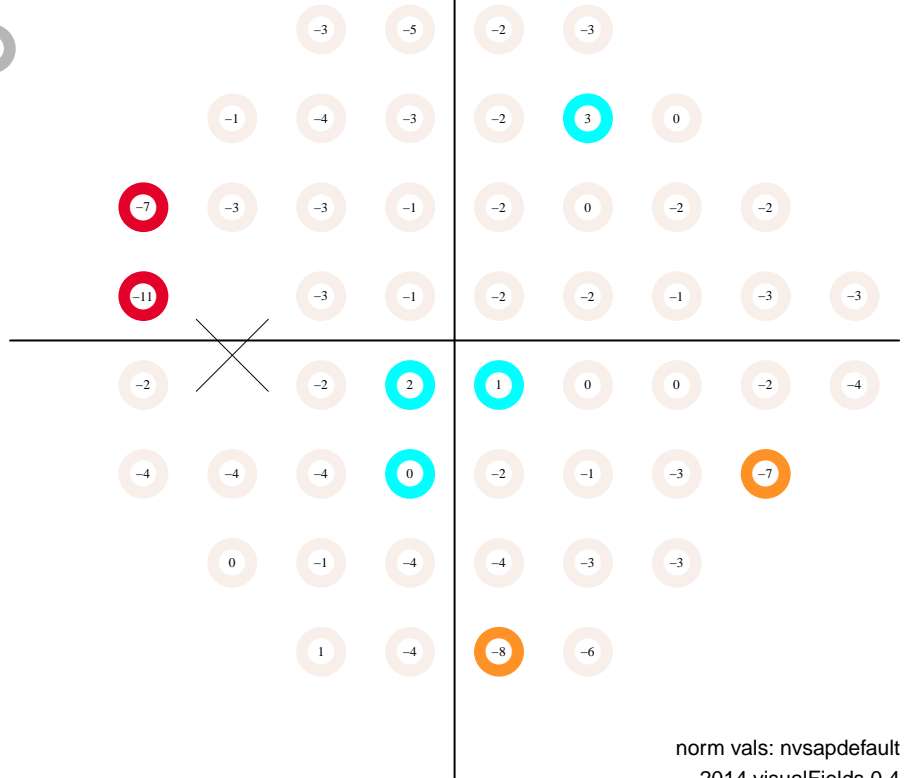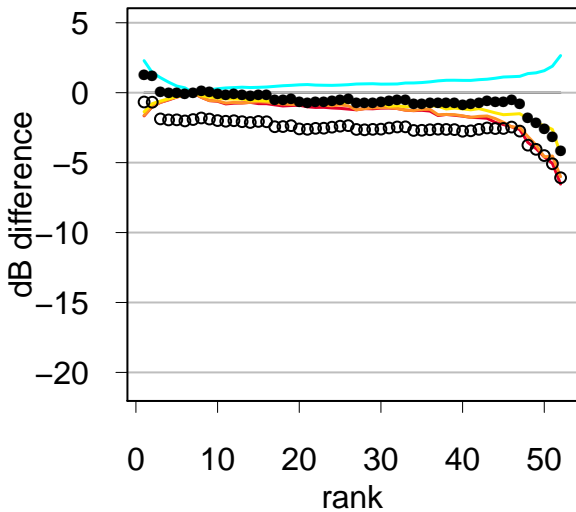

# Static Automated Perimetry. Single field analysis

Subject ID: 1029, age: 45, eye: OS (left)

Date: 02/27/2004 at 7:32:

Duration: 03:59, pause: 00:00

false positives 0.0 %

false negatives 0.0 %

fixation losses 0.0 %

MS 31.5 dB

MD 0.2 dB (p < 95 %)

PSD 2.1 dB (p < 95 %)

VFI 98.7 % (p < 95 %)

GH 2.6 dB

total deviation

Central 24-2  
SITA standard

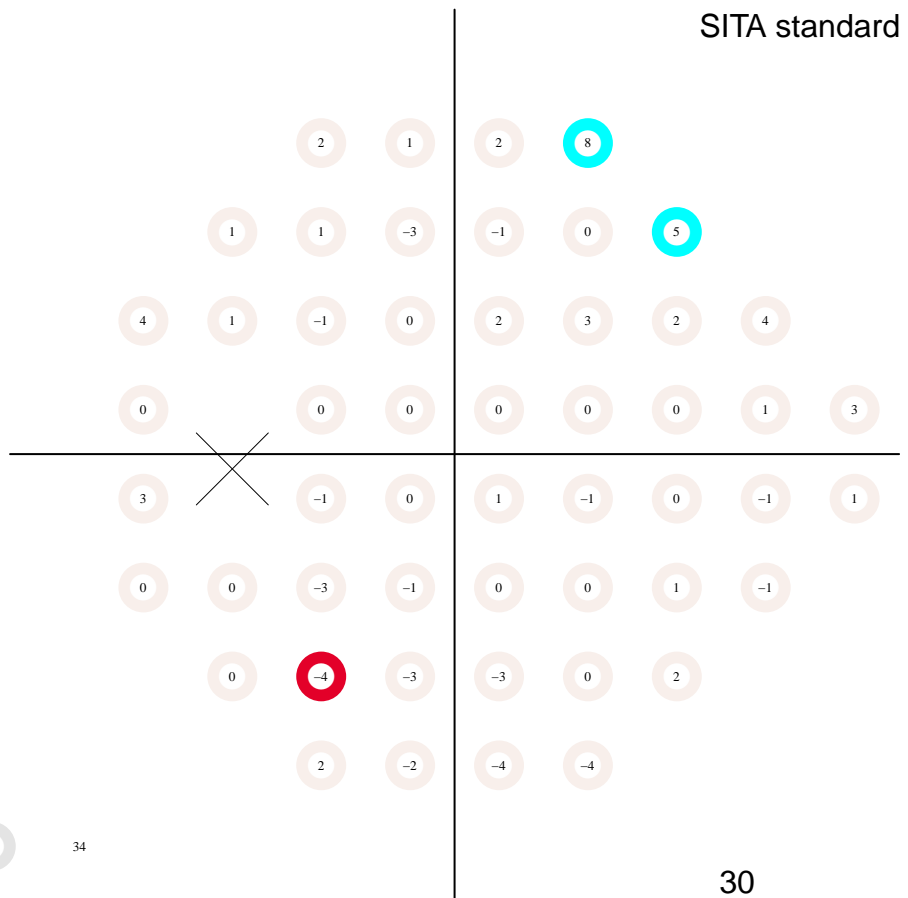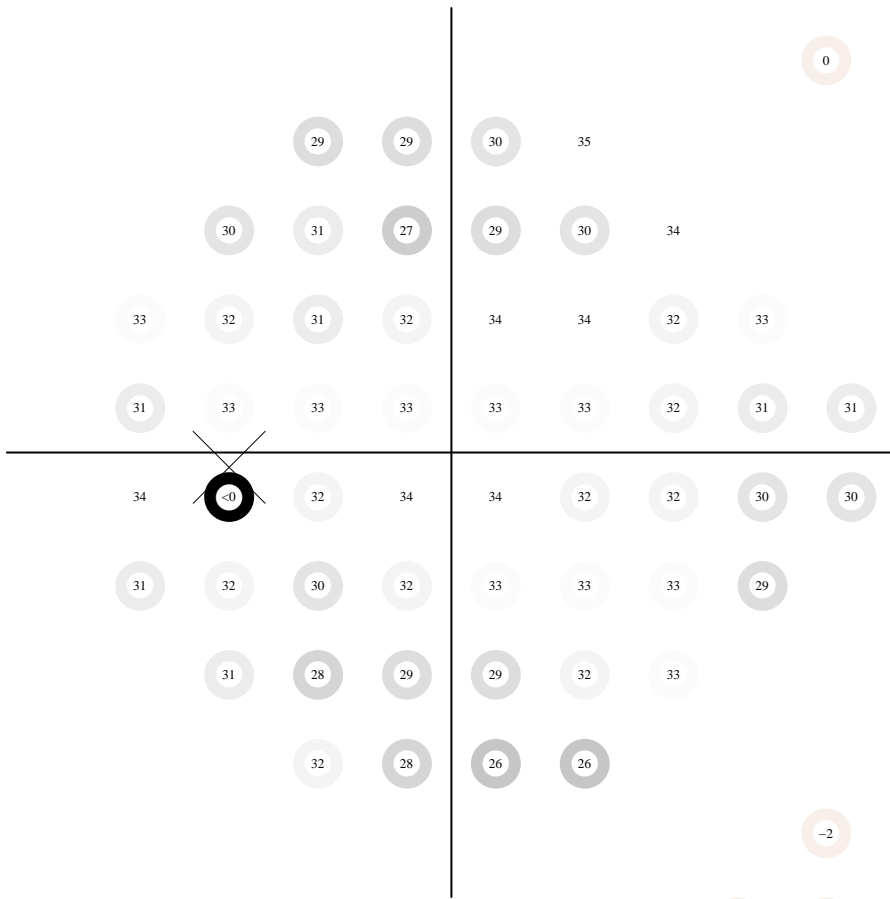

pattern deviation

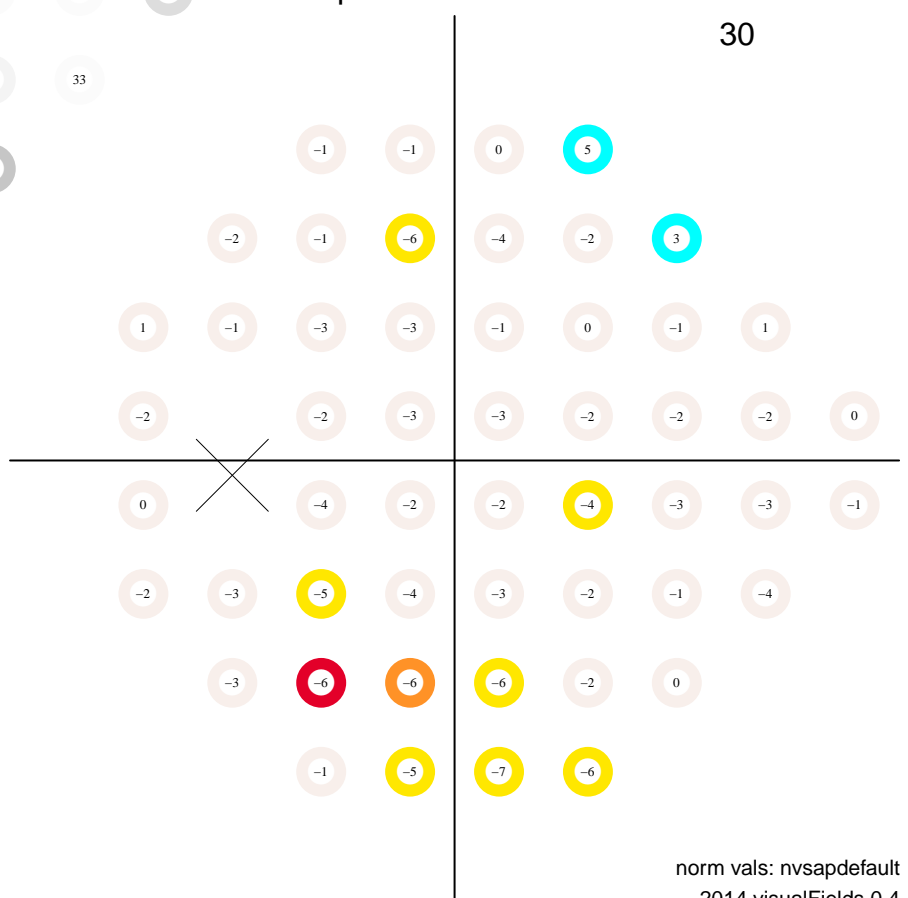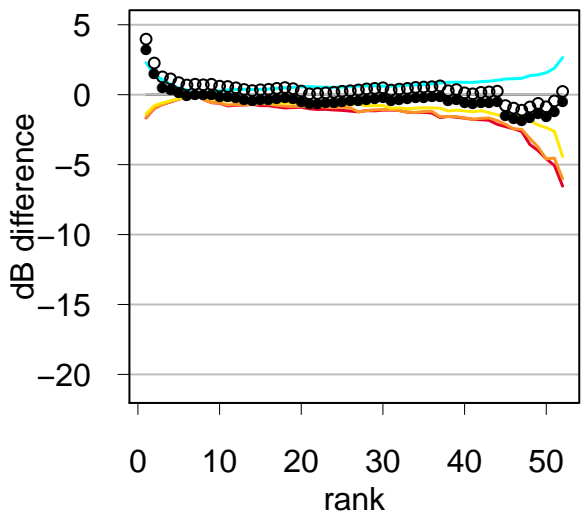

# Static Automated Perimetry. Single field analysis

Subject ID: 1029, age: 46, eye: OS (left)

Date: 07/22/2005 at 8:05:

Duration: 04:08, pause: 00:00

false positives 0.0 %

false negatives 0.0 %

fixation losses 0.0 %

MS 29.7 dB

MD -1.5 dB (p < 95 %)

PSD 2.6 dB (p < 95 %)

VFI 98.7 % (p < 95 %)

GH 0.4 dB

total deviation

Central 24-2  
SITA standard

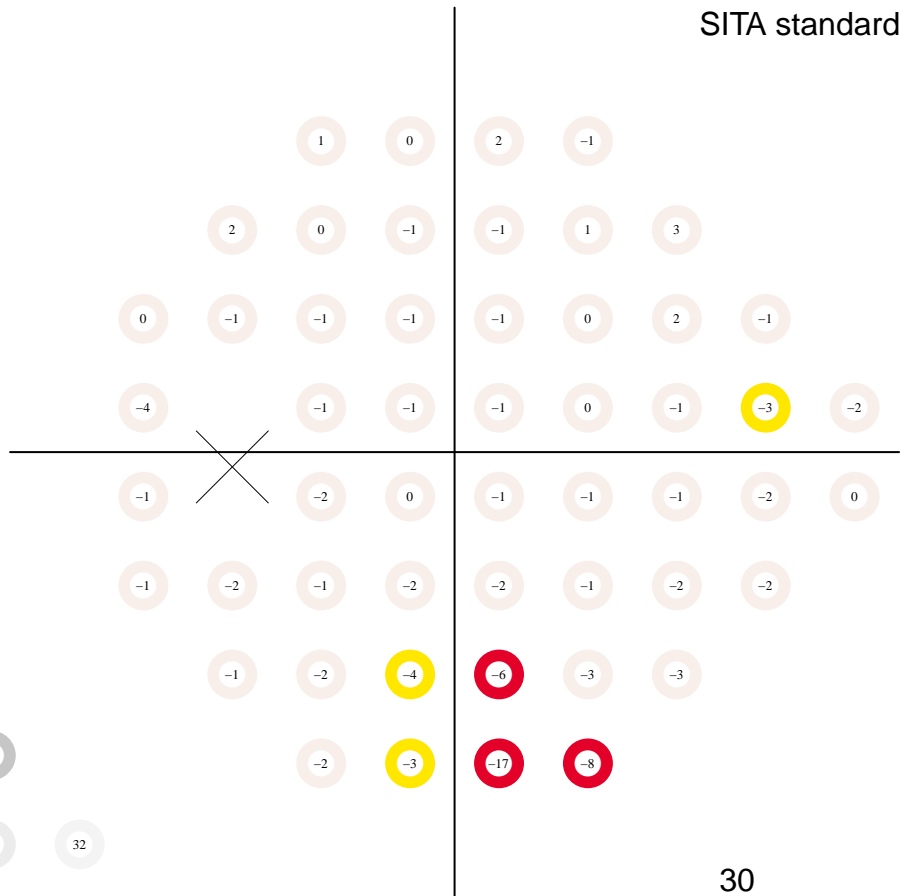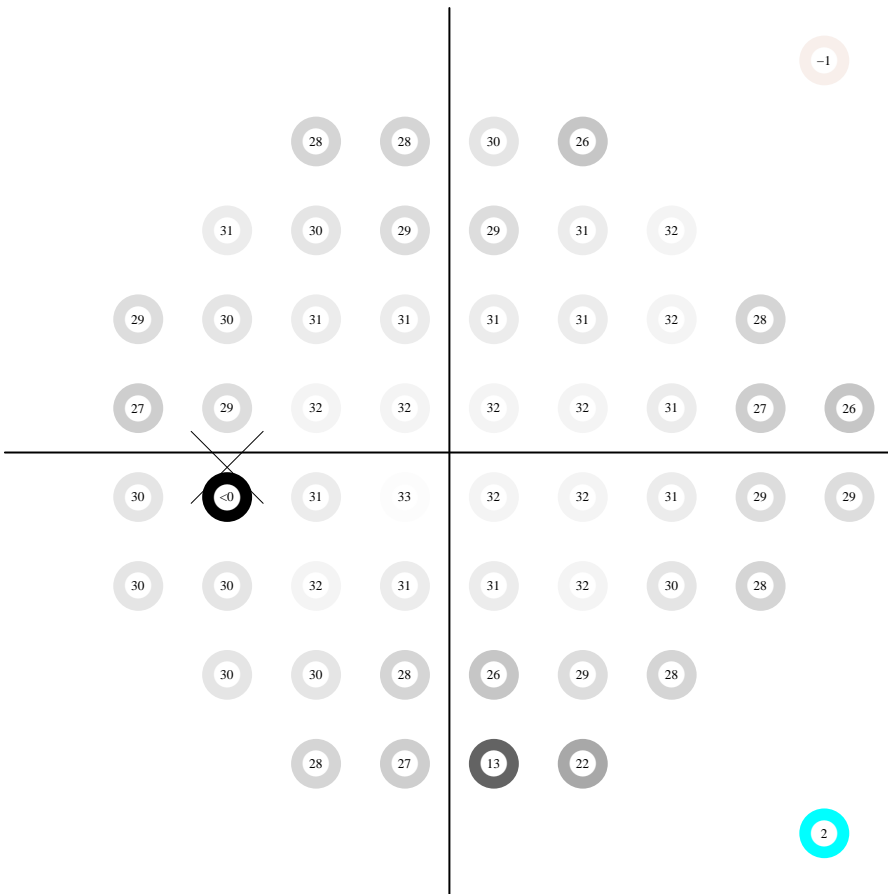

pattern deviation

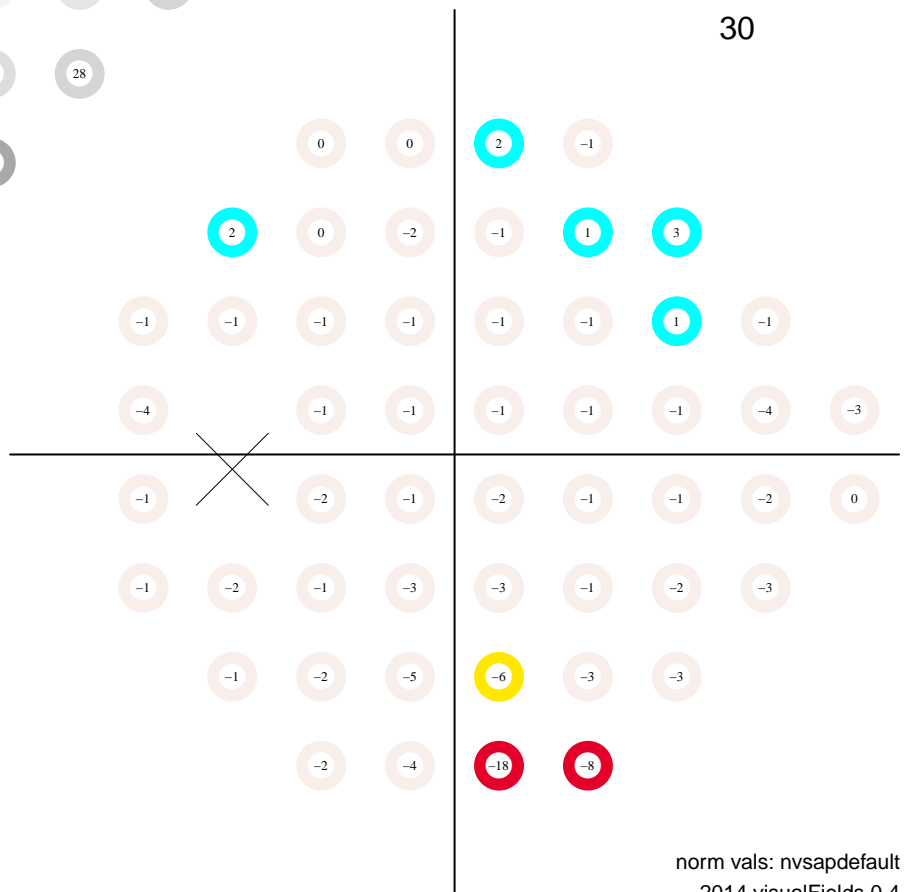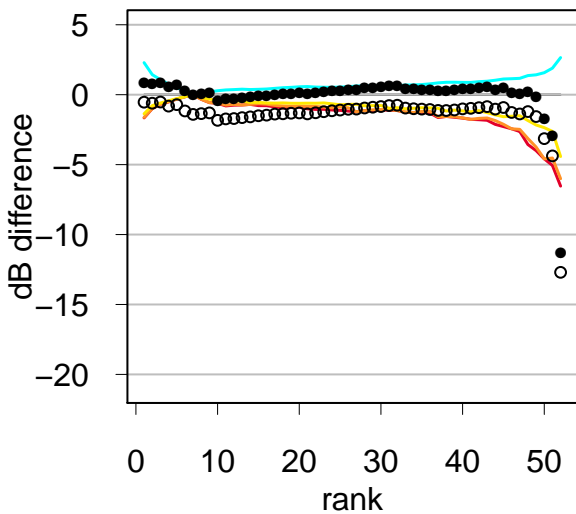



# Static Automated Perimetry. Single field analysis

Subject ID: 1029, age: 46, eye: OS (left)

Date: 09/02/2005 at 7:18:

Duration: 04:27, pause: 00:00

false positives 3.0 %

false negatives 0.0 %

fixation losses 0.0 %

MS 29.9 dB

MD -1.2 dB (p < 95 %)

PSD 1.8 dB (p < 95 %)

VFI 99.1 % (p < 95 %)

GH 0.5 dB

total deviation

Central 24-2  
SITA standard

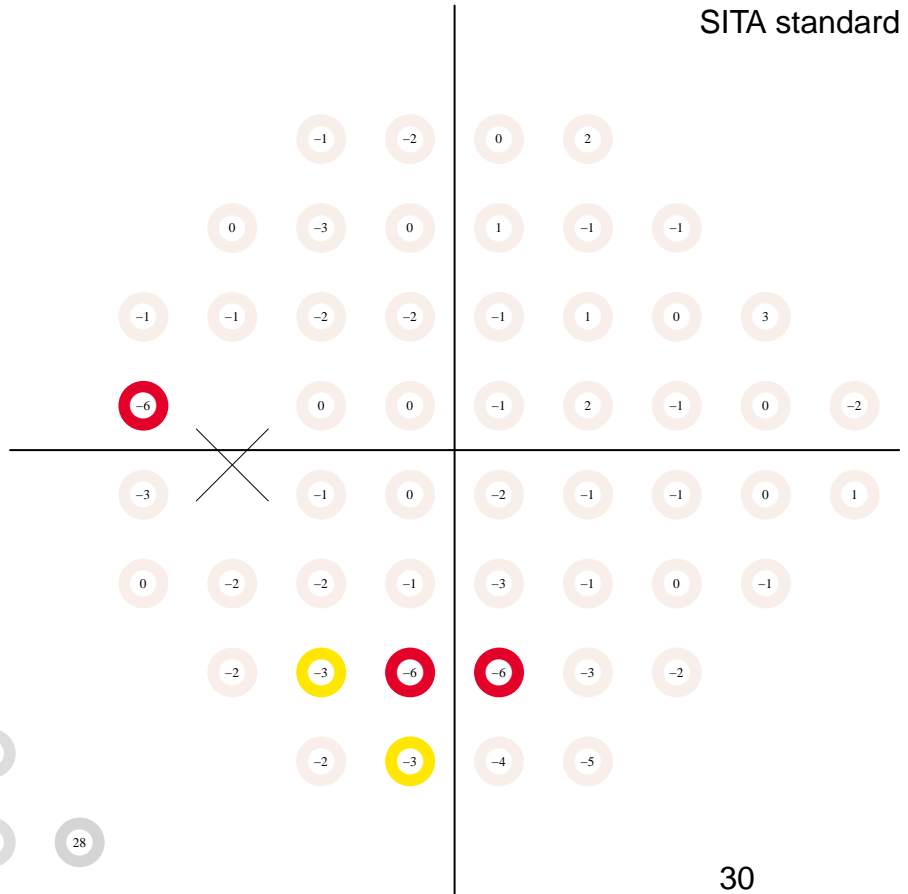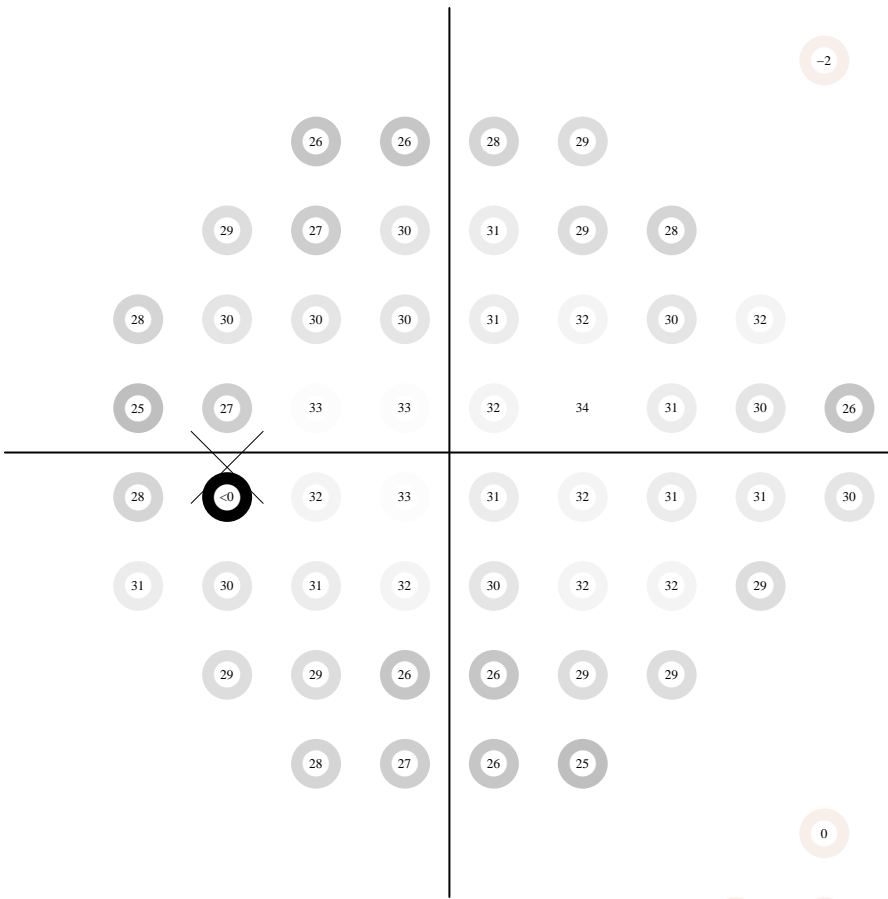

pattern deviation

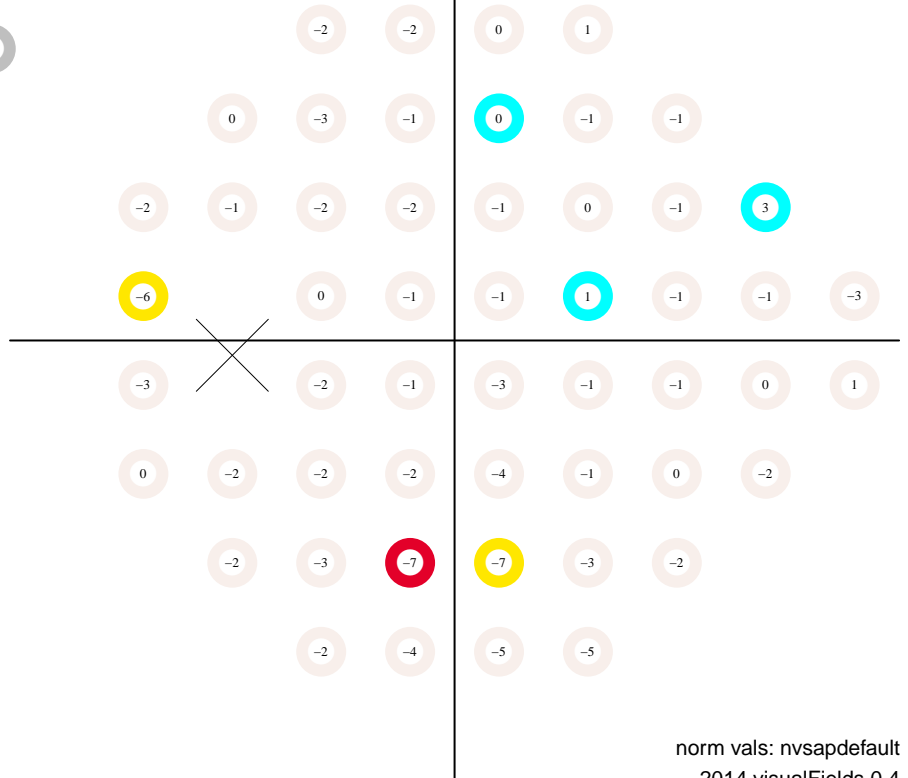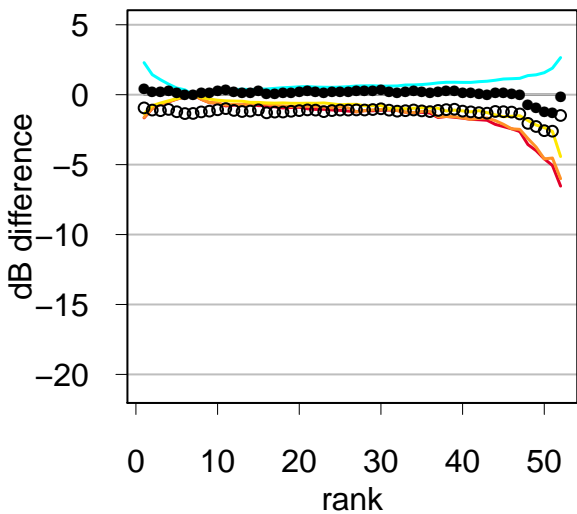

# Static Automated Perimetry. Single field analysis

Subject ID: 1029, age: 47, eye: OS (left)

Date: 10/11/2006 at 7:46:

Duration: 04:08, pause: 00:00

false positives 1.0 %

false negatives 0.0 %

fixation losses 0.0 %

MS 31.5 dB

MD 0.4 dB (p < 95 %)

PSD 1.6 dB (p < 95 %)

VFI 99.8 % (p < 95 %)

GH 2.3 dB

total deviation

Central 24-2  
SITA standard

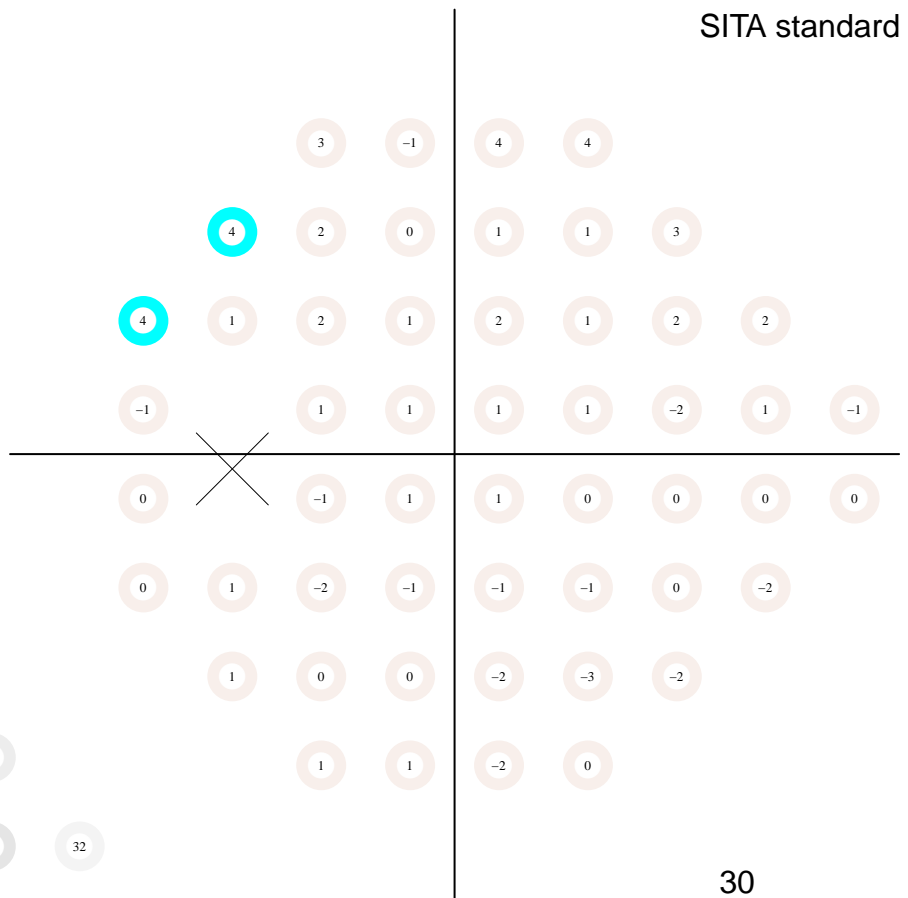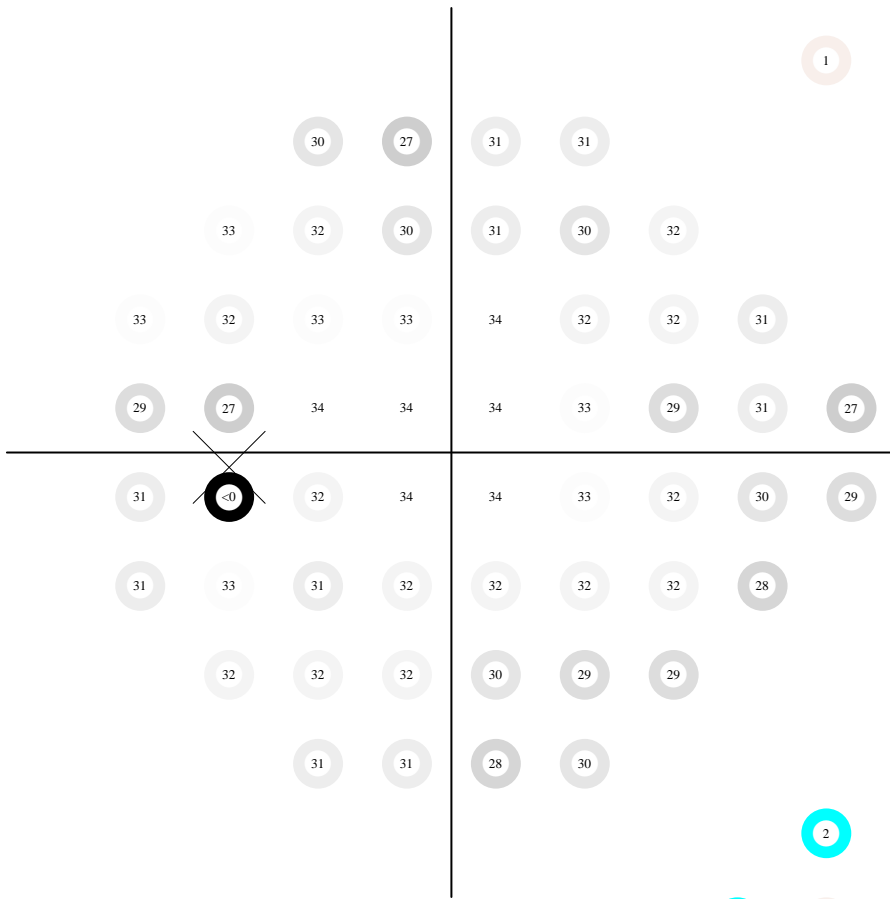

pattern deviation

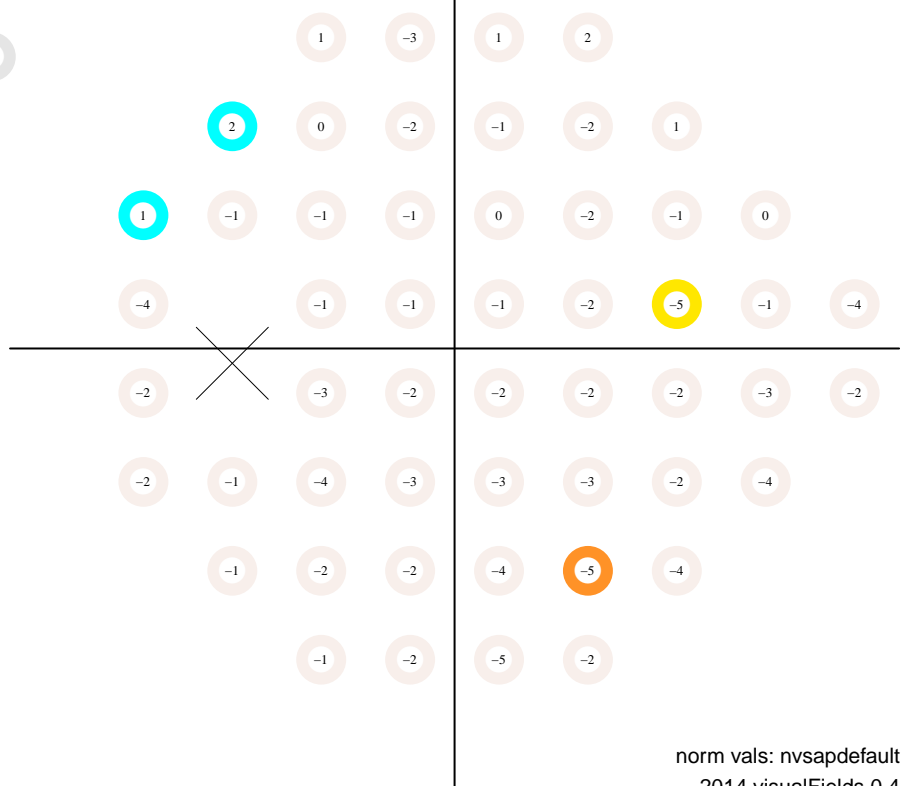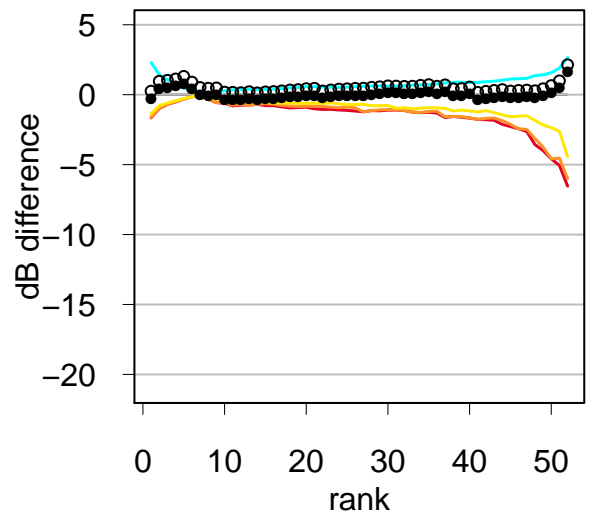

# Static Automated Perimetry. Single field analysis

Subject ID: 1029, age: 48, eye: OS (left)

Date: 09/26/2007 at 8:22:

Duration: 04:24, pause: 00:00

false positives 0.0 %

false negatives 0.0 %

fixation losses 0.0 %

MS 29.5 dB

MD -1.6 dB (p < 95 %)

PSD 2.0 dB (p < 95 %)

VFI 98.7 % (p < 95 %)

GH 0.9 dB

total deviation

Central 24-2  
SITA standard

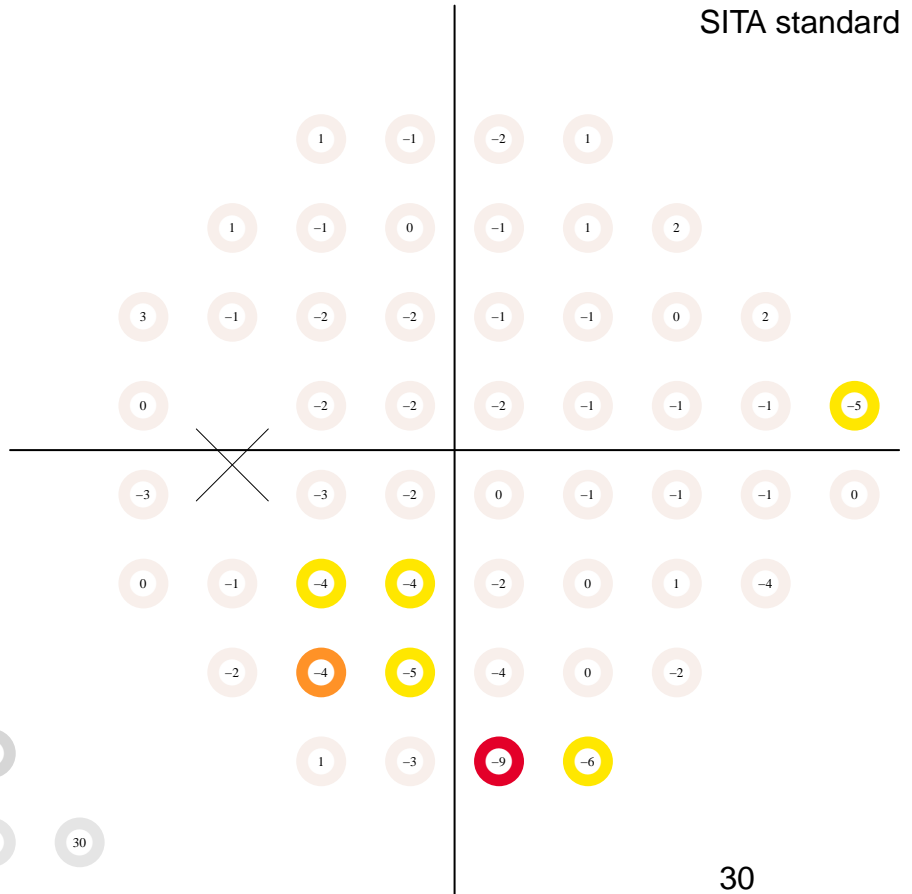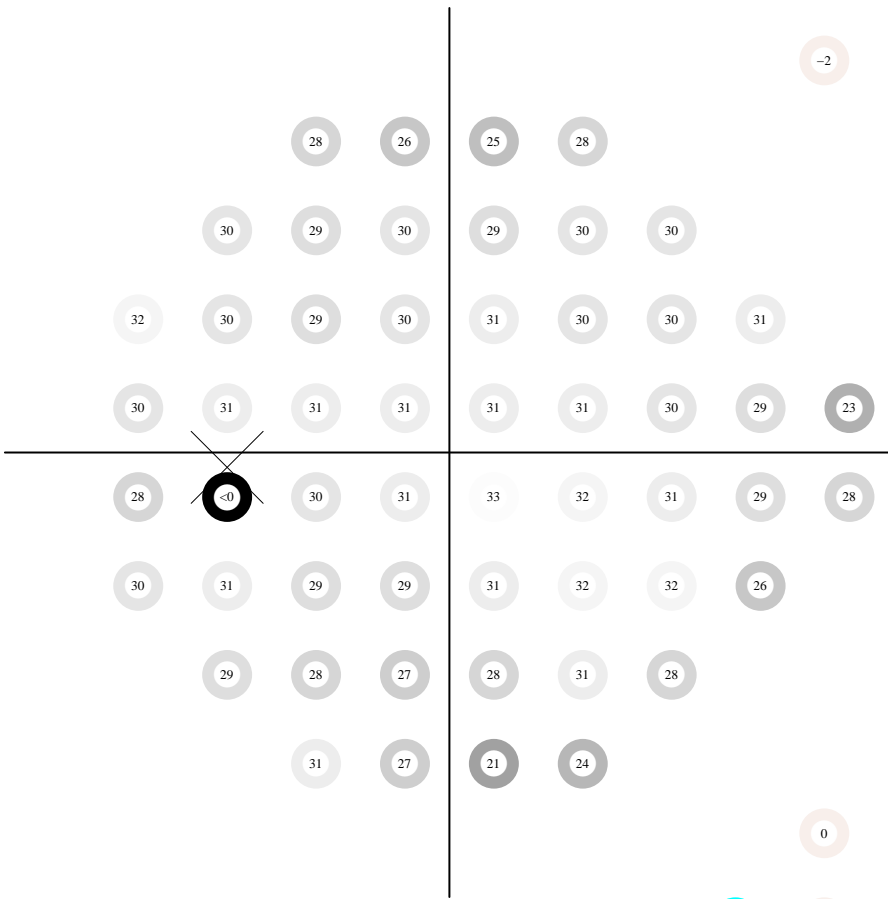

pattern deviation

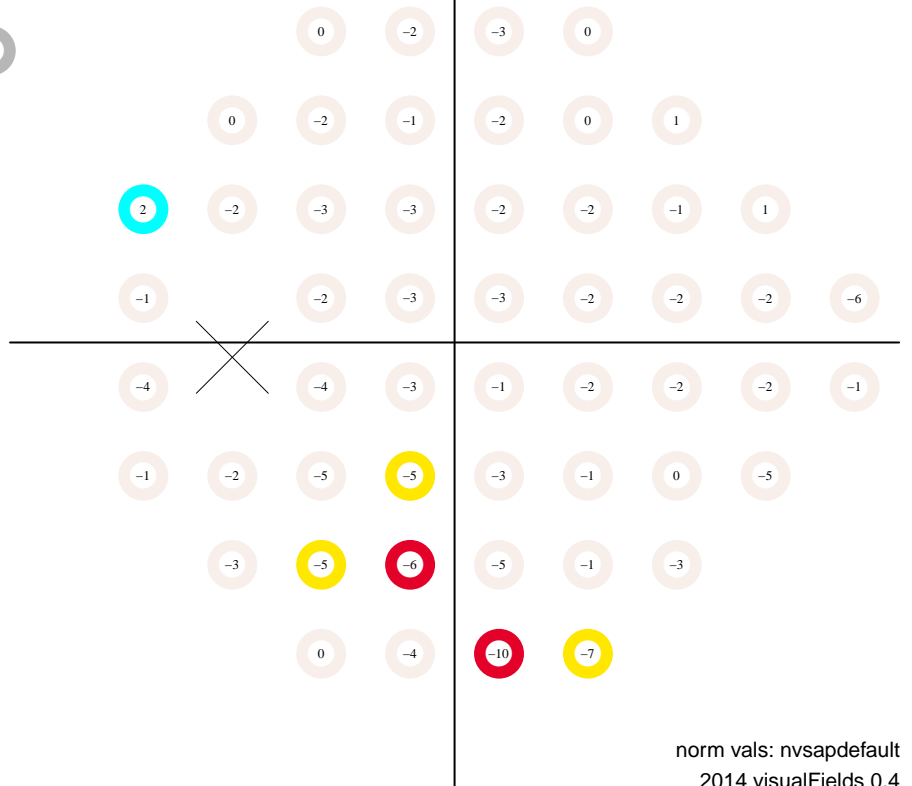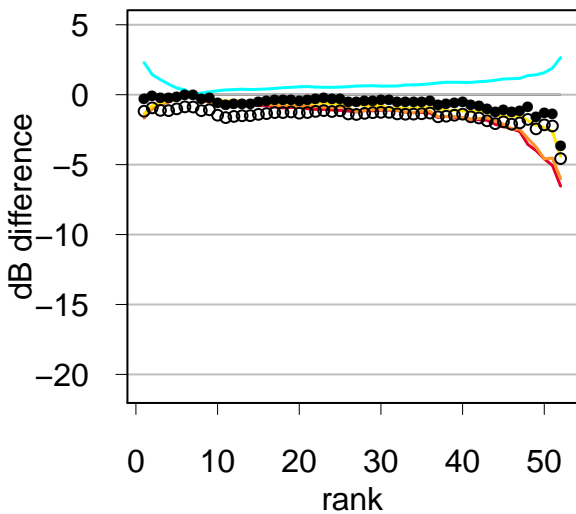

# Static Automated Perimetry. Single field analysis

Subject ID: 1029, age: 48, eye: OS (left)

Date: 10/23/2007 at 8:49:

Duration: 04:13, pause: 00:00

false positives 0.0 %

false negatives 0.0 %

fixation losses 6.2 %

MS 30.7 dB

MD -0.3 dB (p < 95 %)

PSD 1.4 dB (p < 95 %)

VFI 99.8 % (p < 95 %)

GH 1.3 dB

total deviation

Central 24-2  
SITA standard

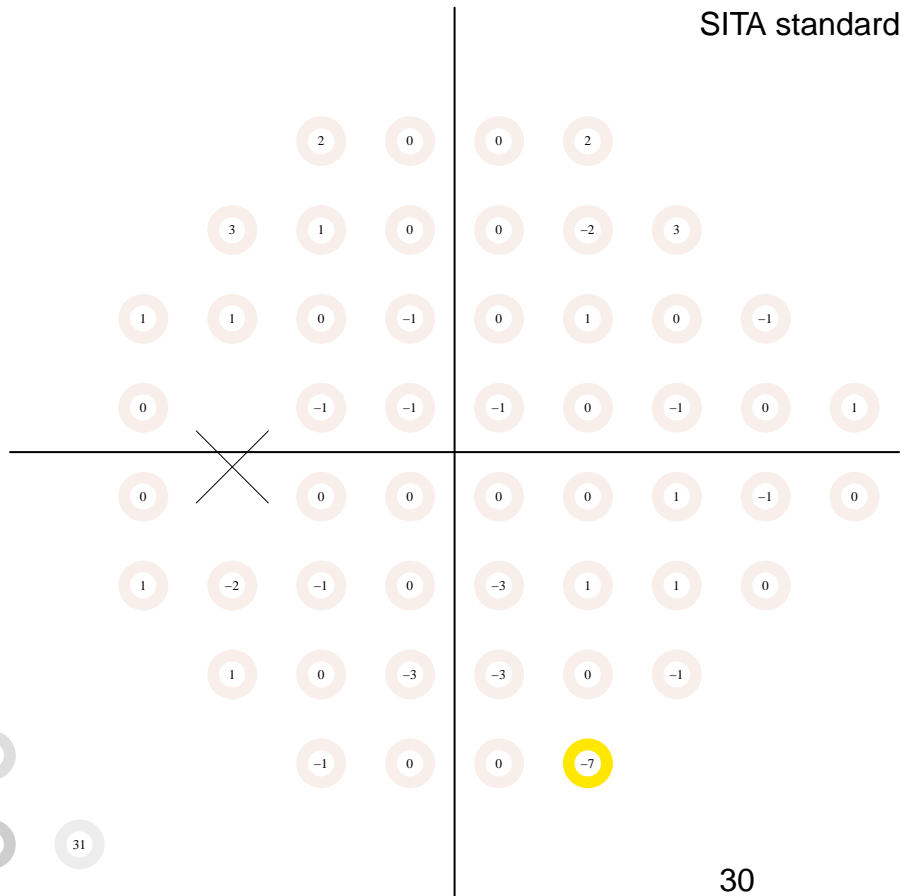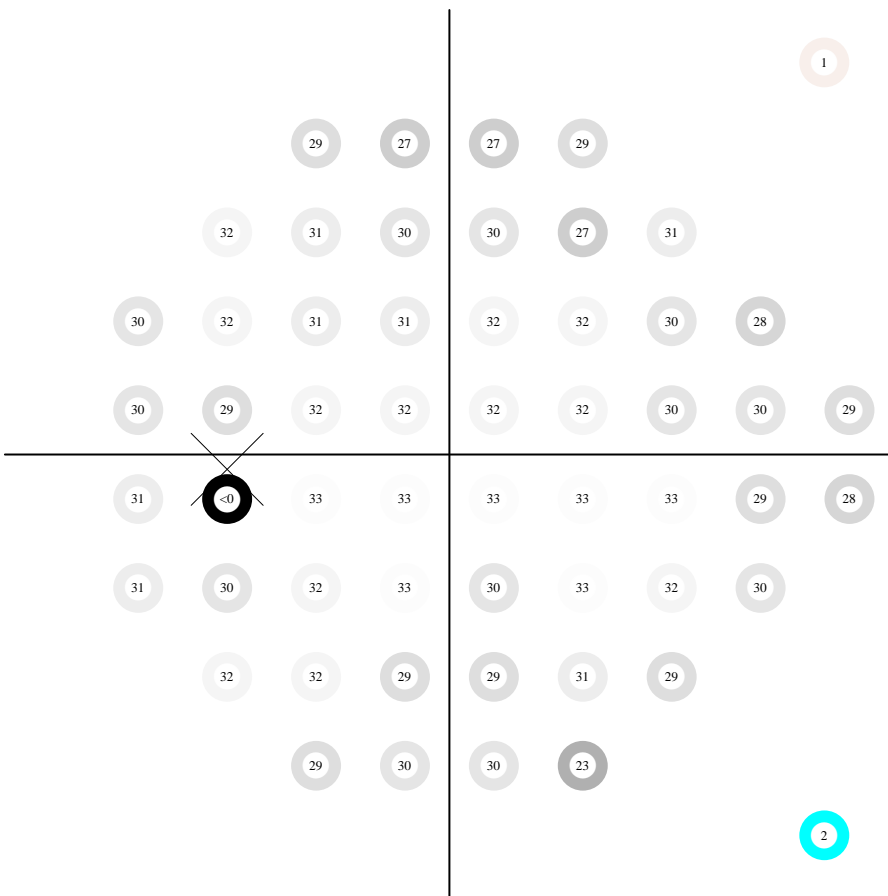

pattern deviation

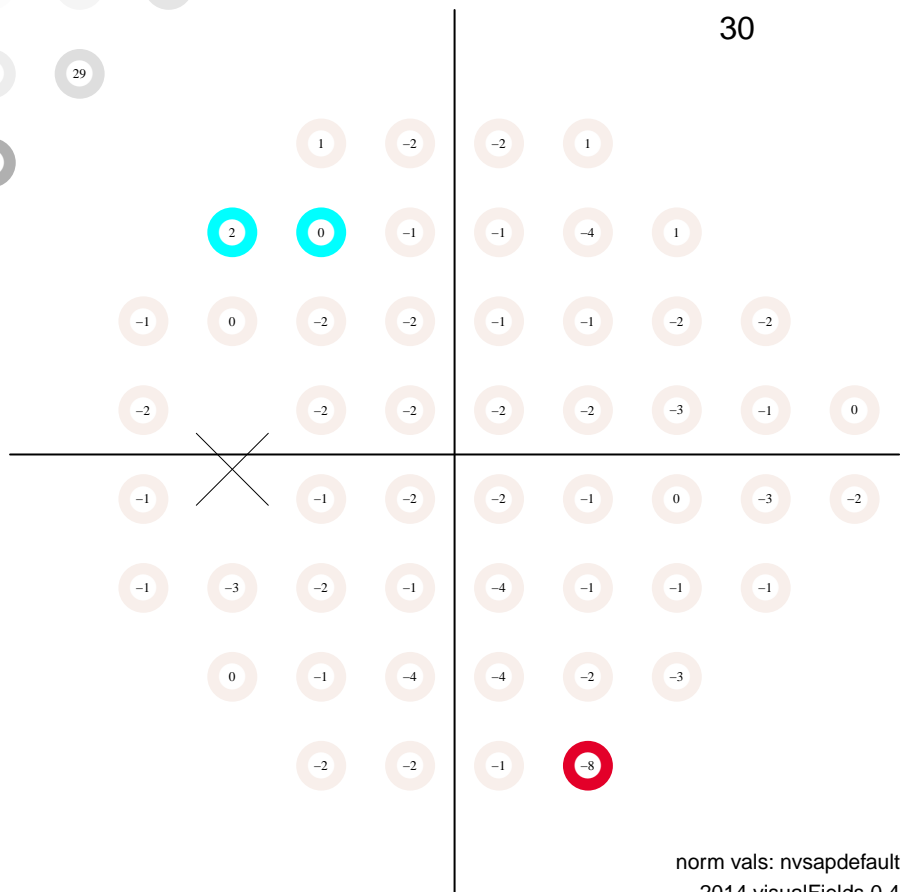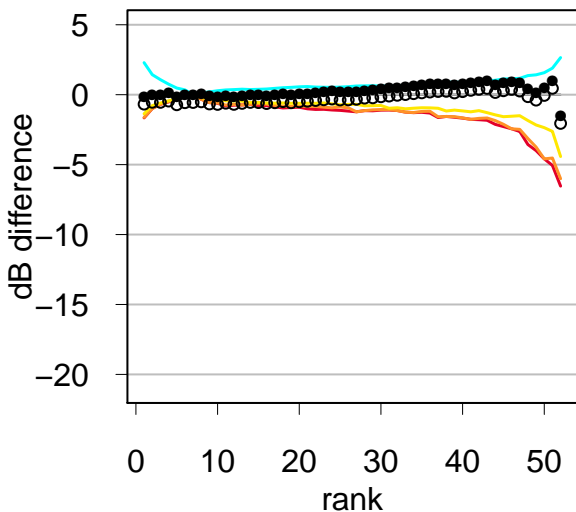

# Static Automated Perimetry. Single field analysis

Subject ID: 1029, age: 49, eye: OS (left)

Date: 04/29/2008 at 7:35:

Duration: 03:57, pause: 00:00

false positives 1.0 %

false negatives 0.0 %

fixation losses 0.0 %

MS 31.0 dB

MD -0.0 dB (p < 95 %)

PSD 2.0 dB (p < 95 %)

VFI 99.1 % (p < 95 %)

GH 2.3 dB

total deviation

Central 24-2  
SITA standard

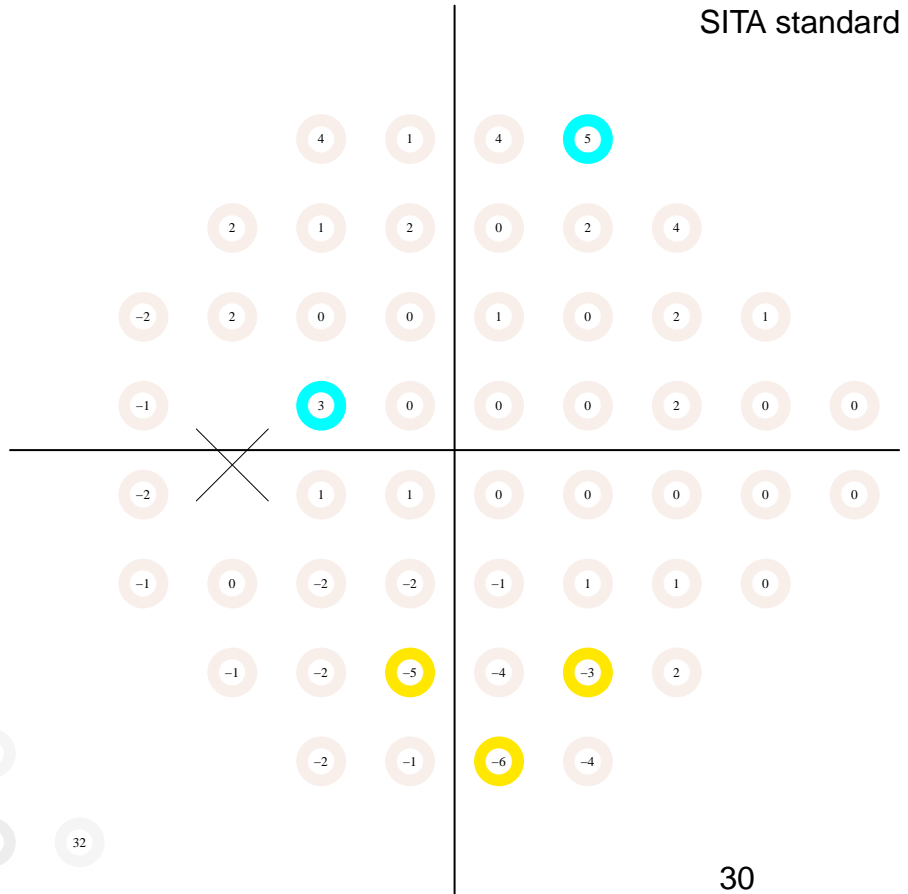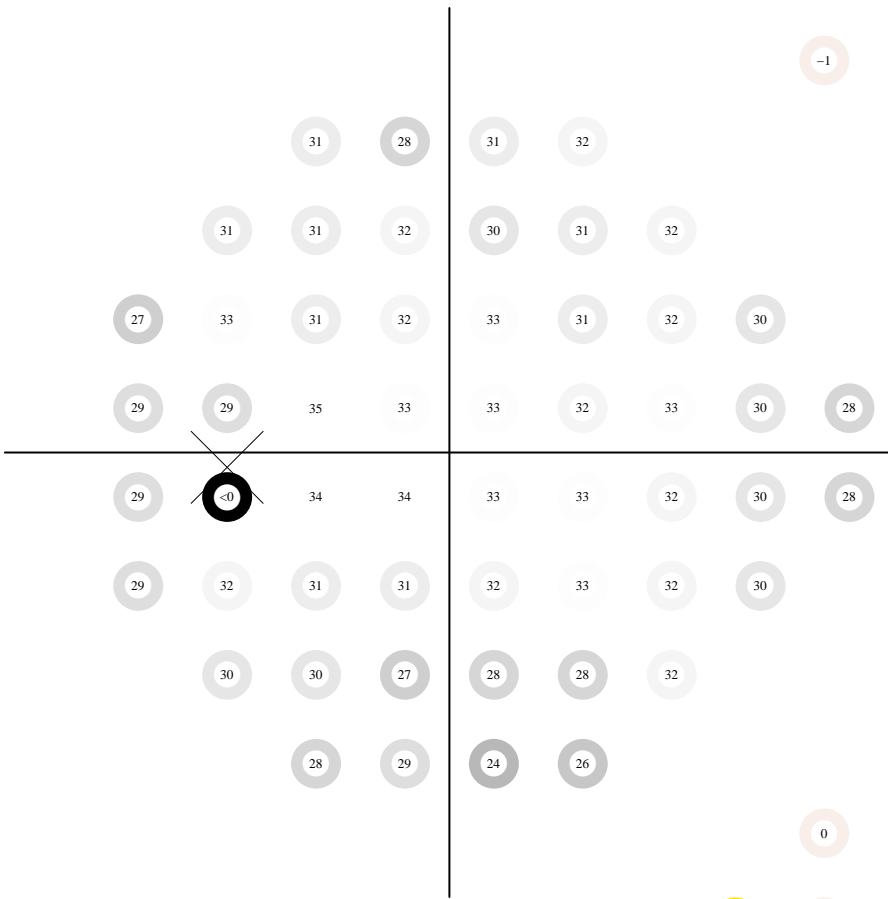

pattern deviation

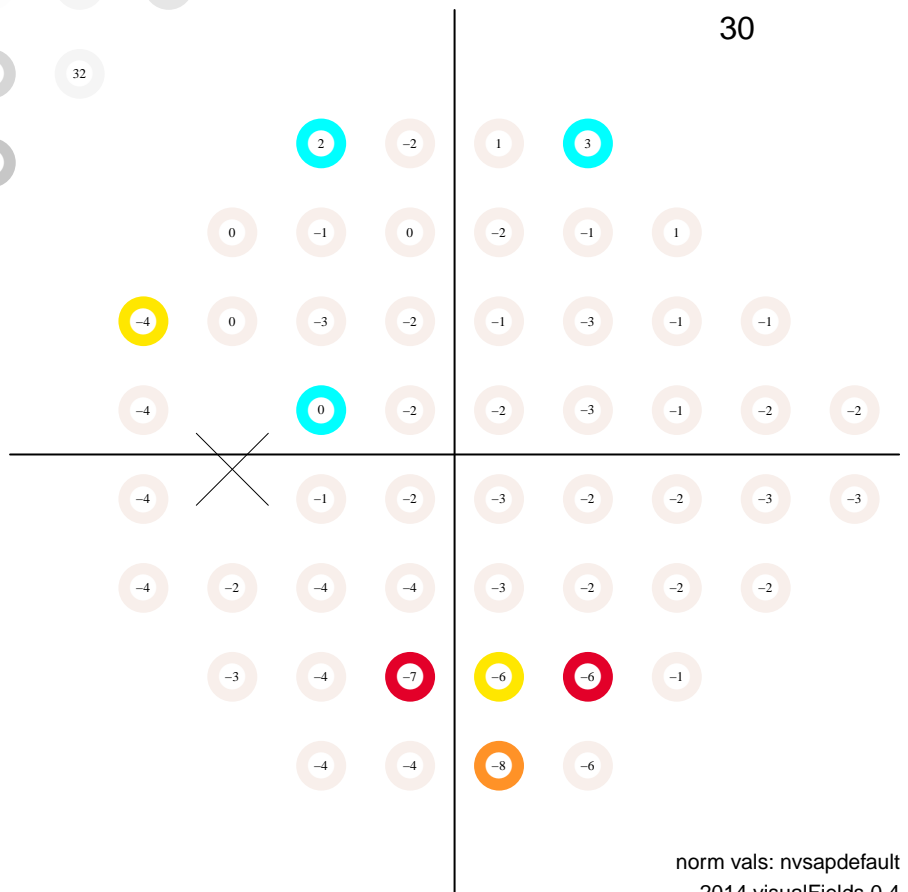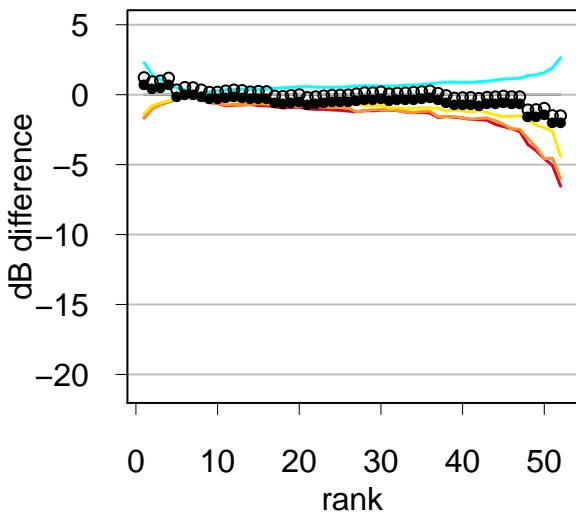

# Static Automated Perimetry. Single field analysis

Subject ID: 1029, age: 49, eye: OS (left)

Date: 11/18/2008 at 8:53:

Duration: 04:19, pause: 00:00

false positives 2.0 %

false negatives 4.0 %

fixation losses 7.1 %

MS 30.9 dB

MD -0.1 dB (p < 95 %)

PSD 2.0 dB (p < 95 %)

VFI 98.7 % (p < 95 %)

GH 2.3 dB

total deviation

Central 24-2  
SITA standard

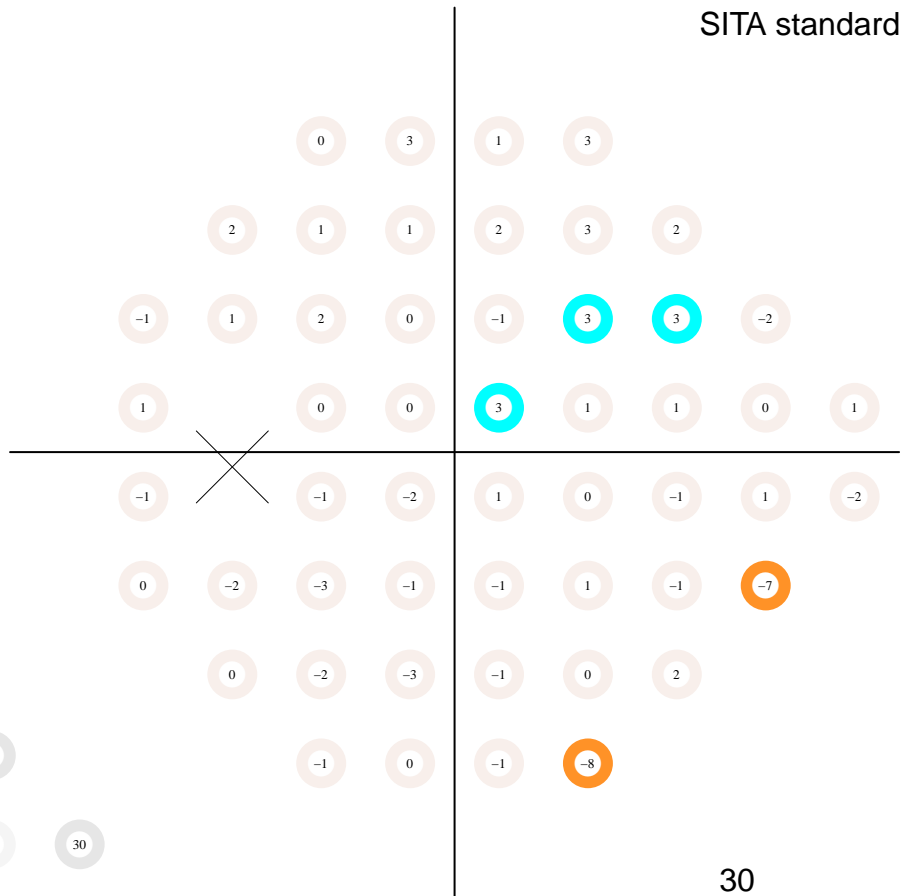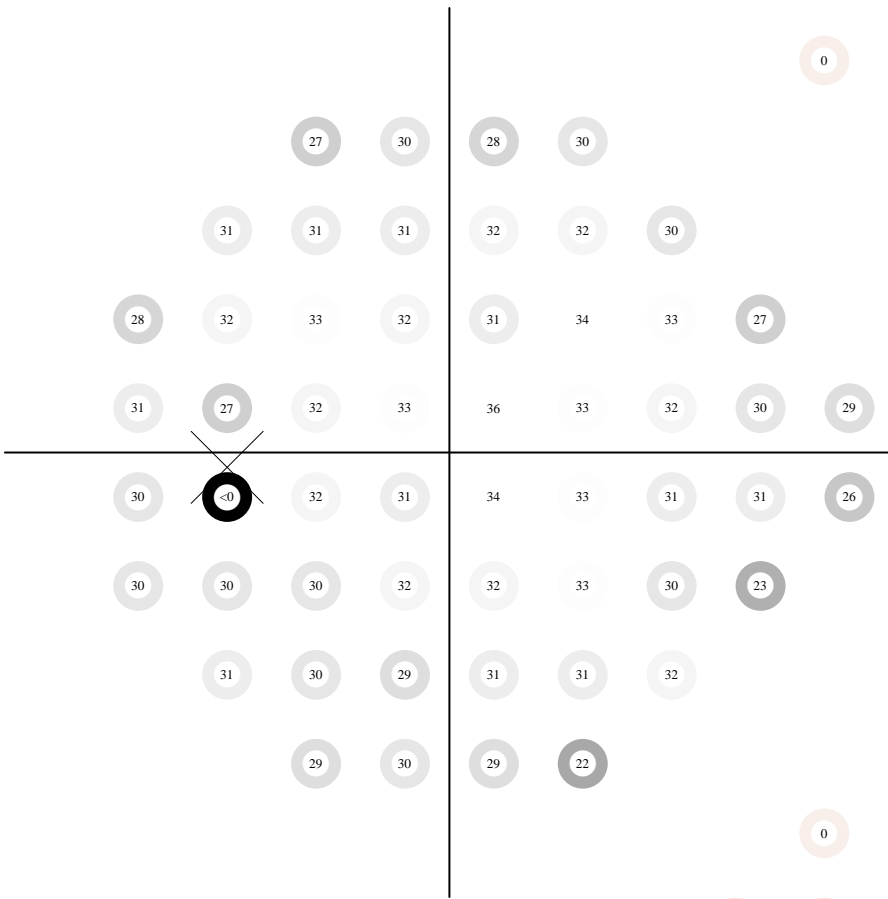

pattern deviation

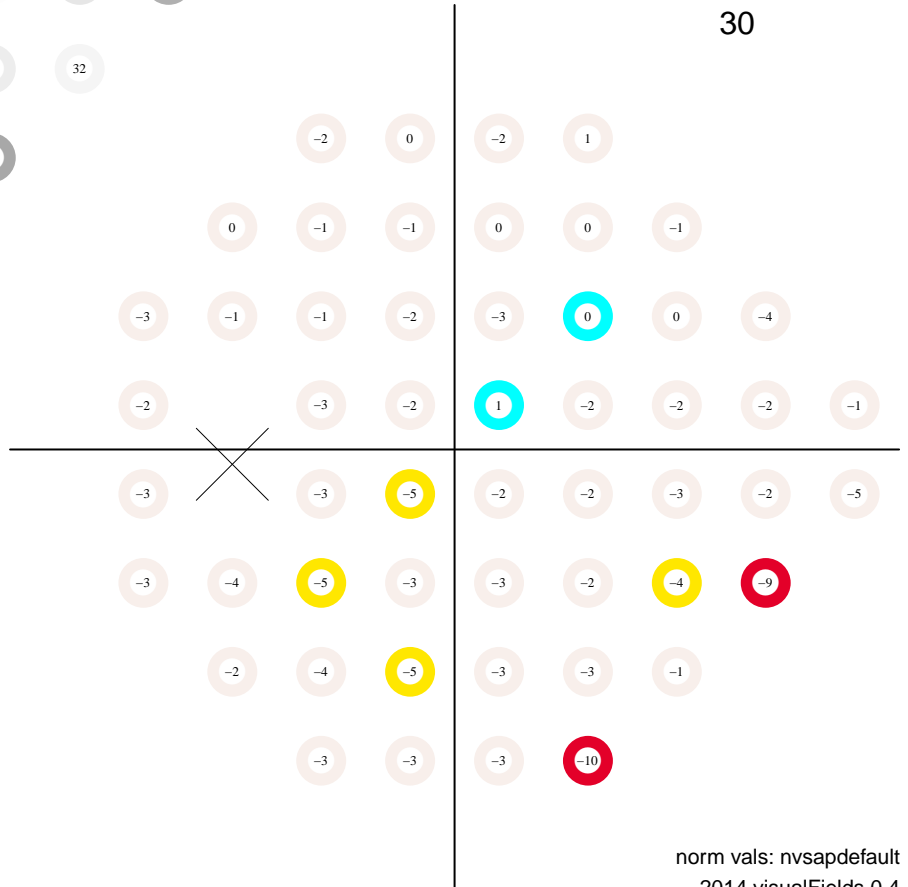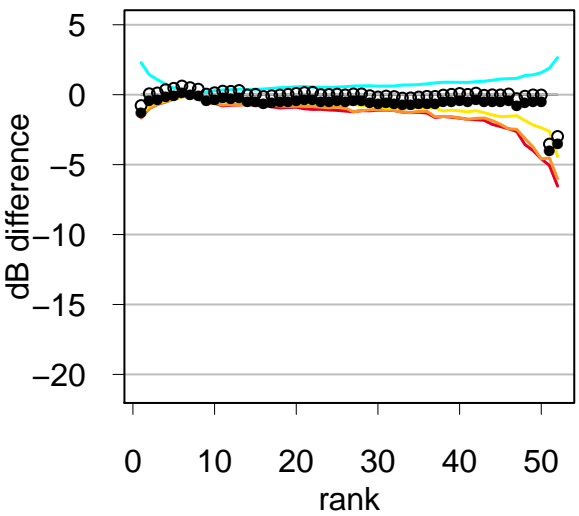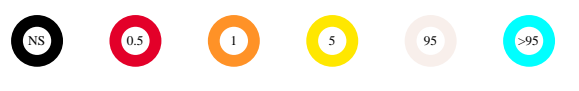

# Static Automated Perimetry. Single field analysis

Subject ID: 1029, age: 50, eye: OS (left)

Date: 05/12/2009 at 7:39:

Duration: 03:59, pause: 00:00

false positives 0.0 %

false negatives 0.0 %

fixation losses 0.0 %

MS 30.6 dB

MD -0.3 dB (p < 95 %)

PSD 2.1 dB (p < 95 %)

VFI 99.4 % (p < 95 %)

GH 1.6 dB

total deviation

Central 24-2  
SITA standard

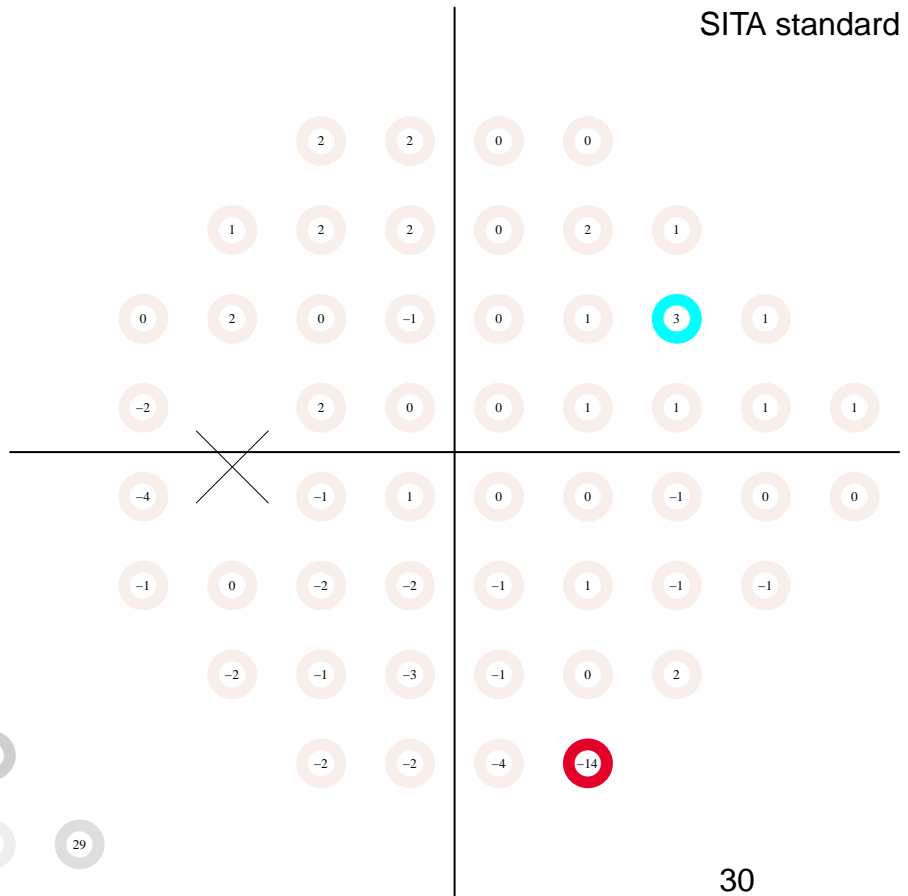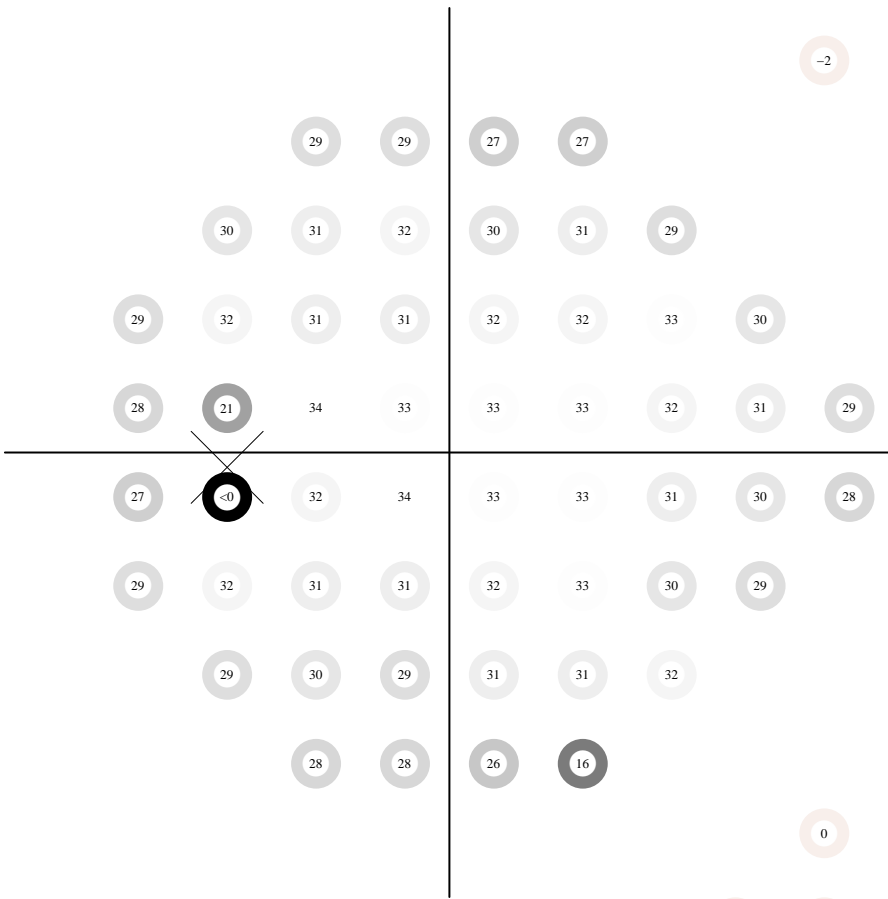

pattern deviation

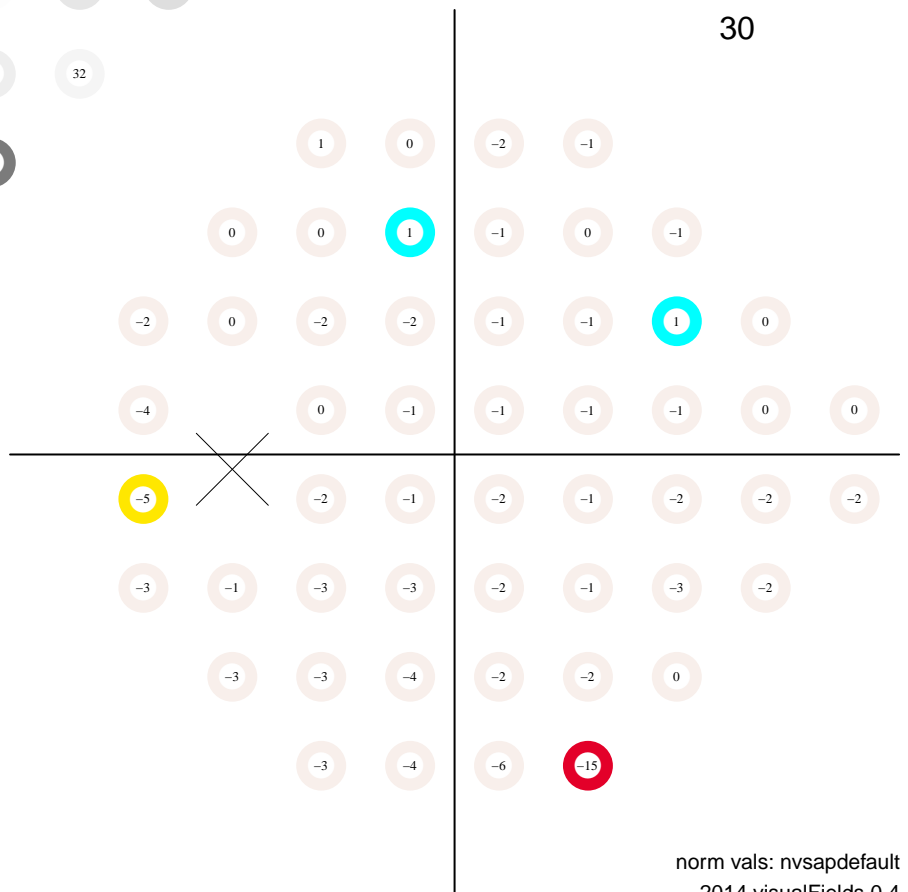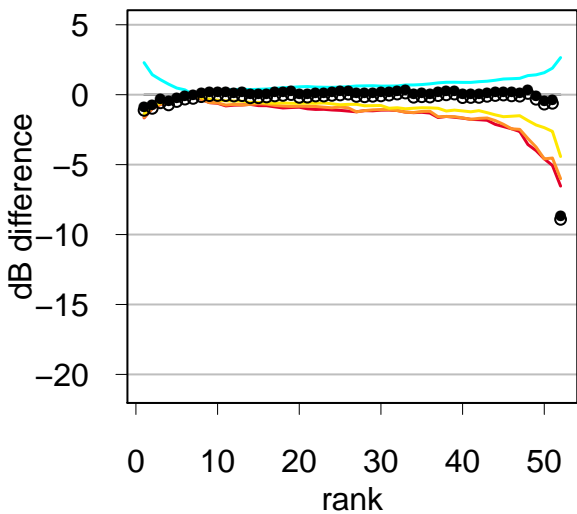

# Static Automated Perimetry. Single field analysis

Subject ID: 1029, age: 50, eye: OS (left)

Date: 05/19/2009 at 7:52:

Duration: 04:11, pause: 00:00

false positives 0.0 %

false negatives 5.0 %

fixation losses 0.0 %

MS 30.2 dB

MD -0.8 dB (p < 95 %)

PSD 2.4 dB (p < 95 %)

VFI 98.4 % (p < 95 %)

GH 1.7 dB

total deviation

Central 24-2  
SITA standard

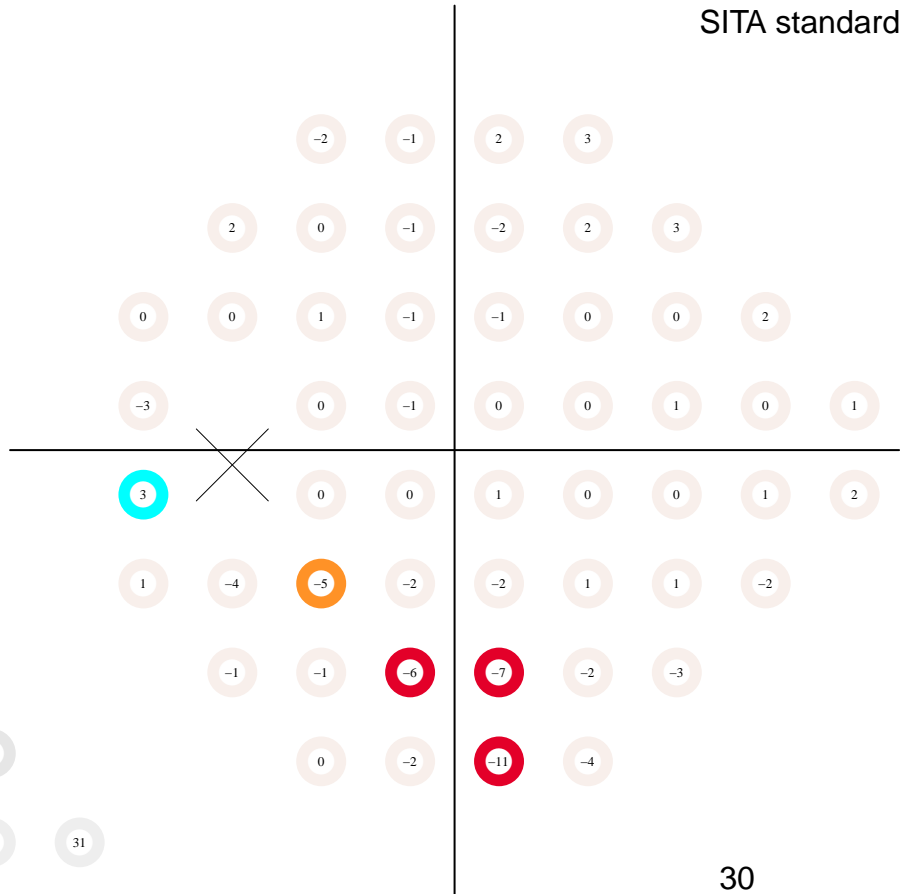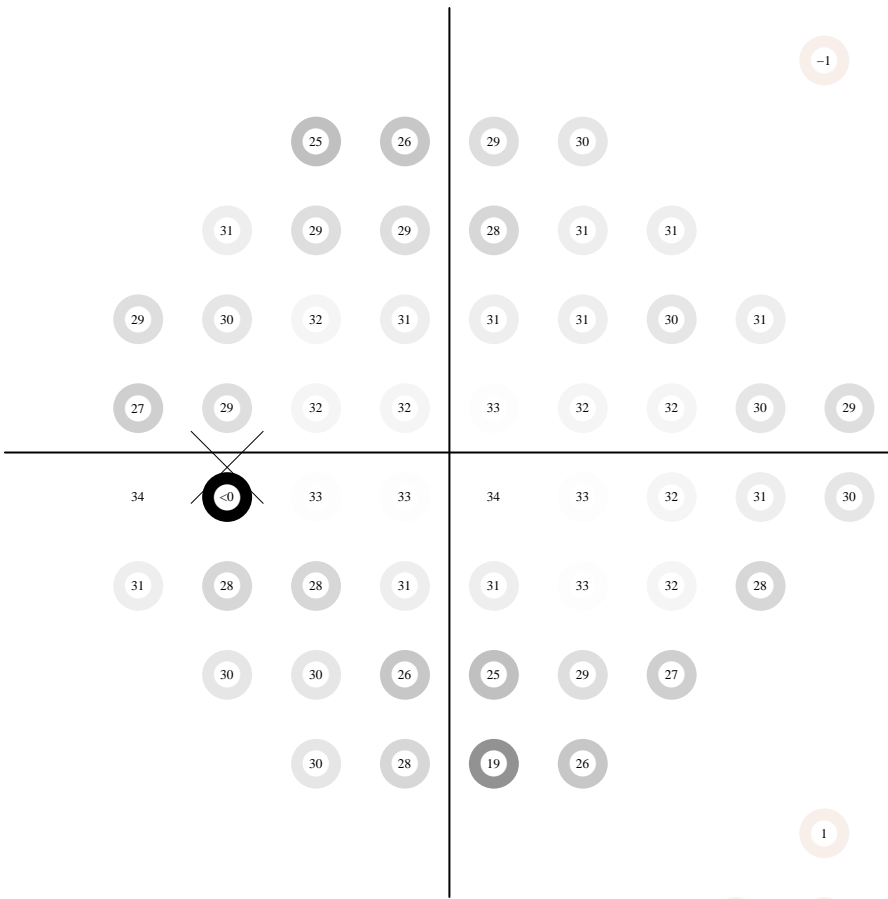

pattern deviation

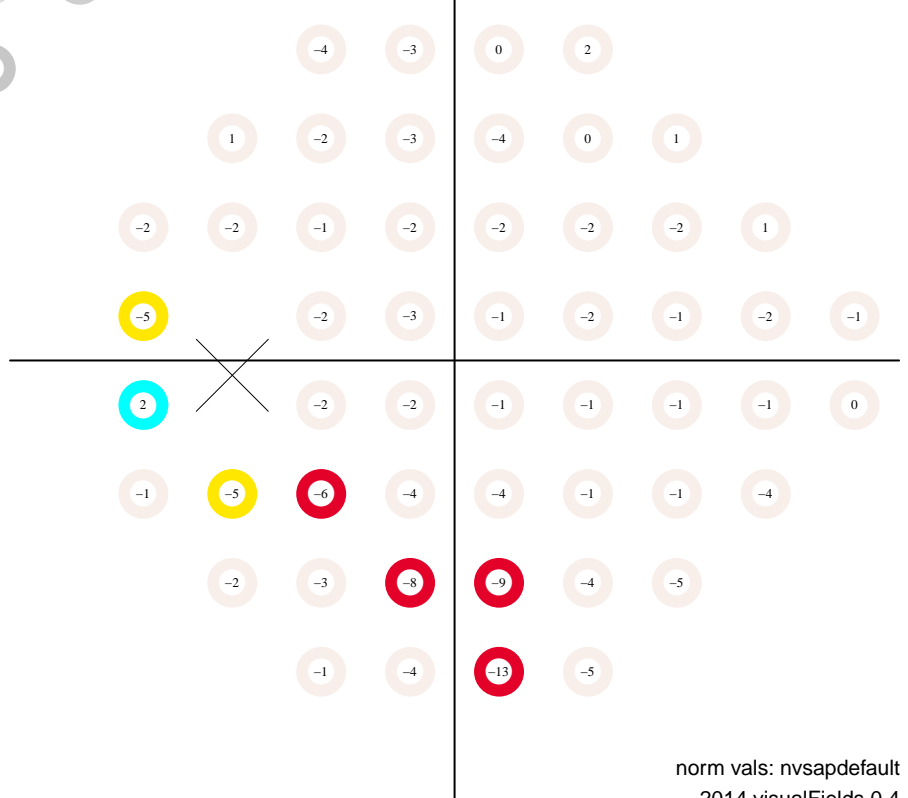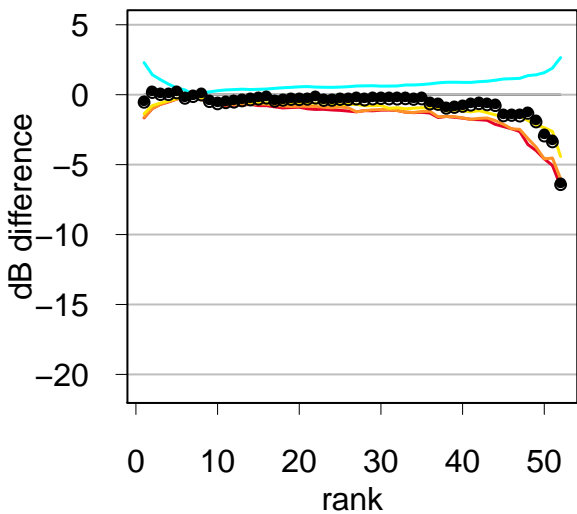



# Static Automated Perimetry. Single field analysis

Subject ID: 1029, age: 50, eye: OS (left)

Date: 09/01/2009 at 12:04

Duration: 04:29, pause: 00:00

false positives 0.0 %

false negatives 2.0 %

fixation losses 0.0 %

MS 29.2 dB

MD -1.7 dB (p < 95 %)

PSD 2.2 dB (p < 95 %)

VFI 98.8 % (p < 95 %)

GH 0.4 dB

total deviation

Central 24-2  
SITA standard

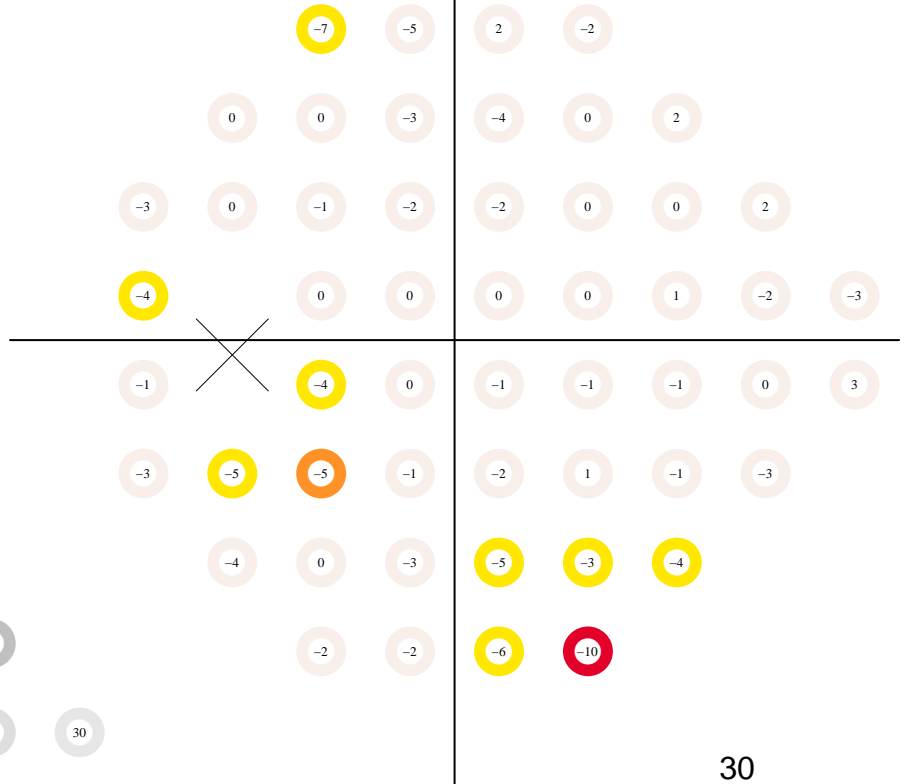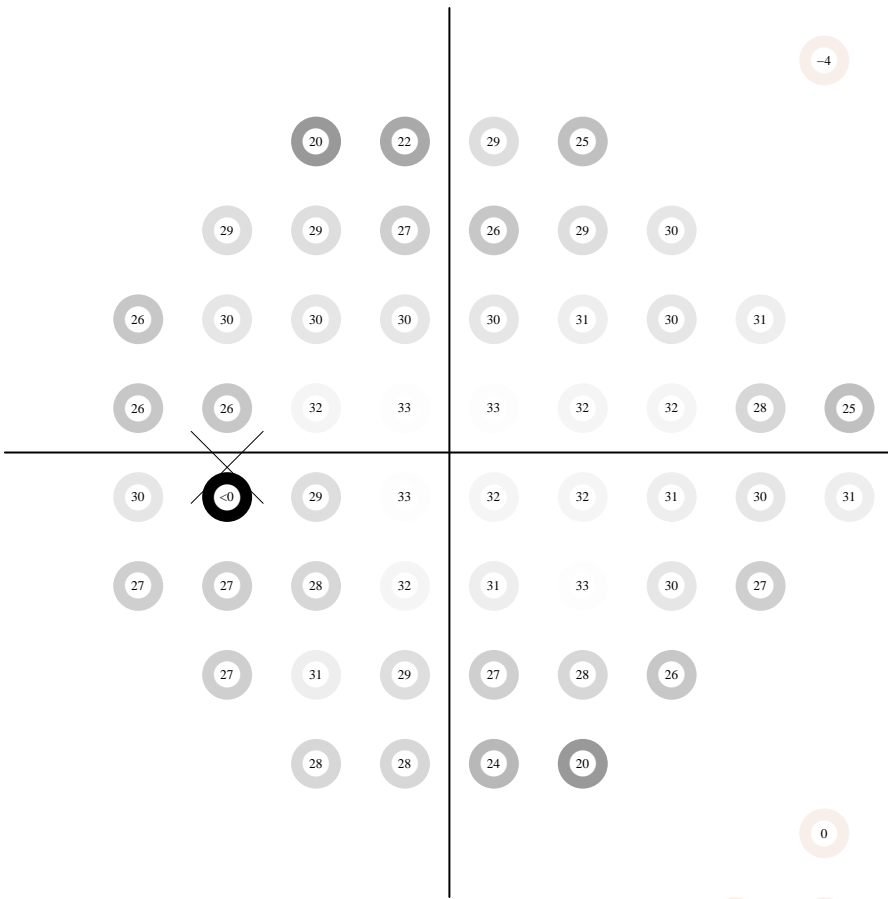

pattern deviation

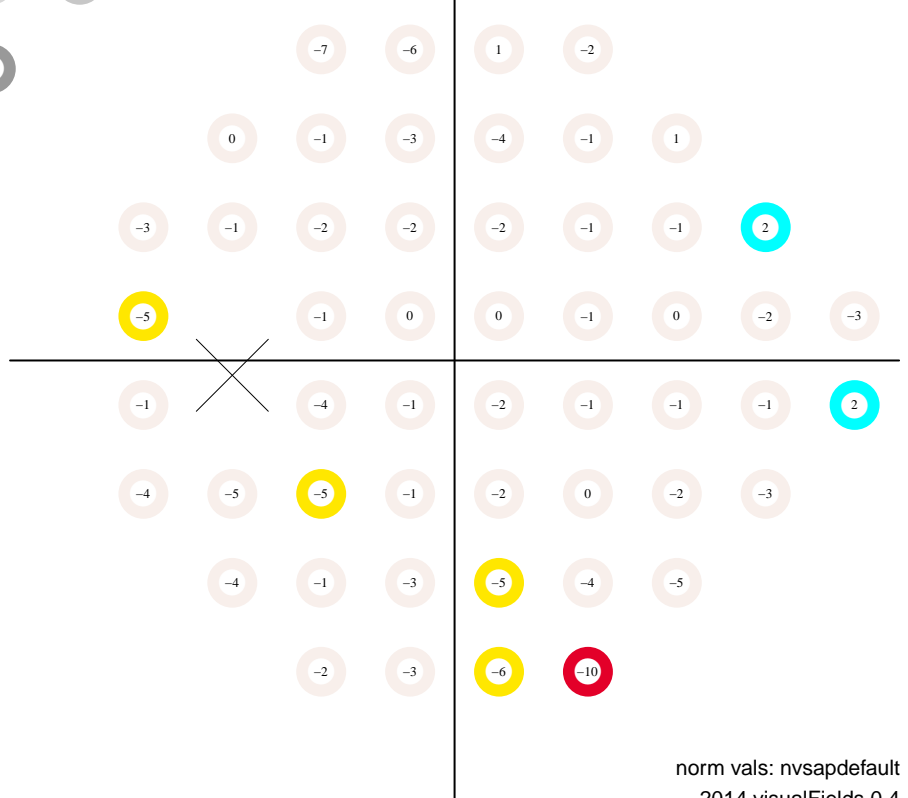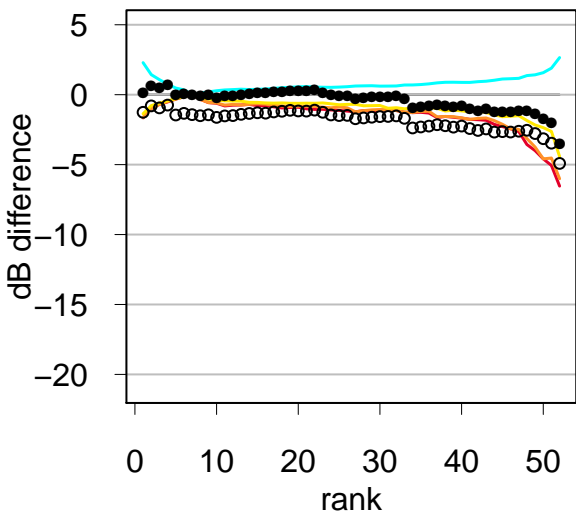

# Static Automated Perimetry. Single field analysis

Subject ID: 1029, age: 51, eye: OS (left)

Date: 12/01/2009 at 15:33

Duration: 04:47, pause: 00:00

false positives 0.0 %

false negatives 0.0 %

fixation losses 0.0 %

MS 29.1 dB

MD -1.8 dB (p < 95 %)

PSD 2.3 dB (p < 95 %)

VFI 97.8 % (p < 95 %)

GH 0.5 dB

total deviation

Central 24-2  
SITA standard

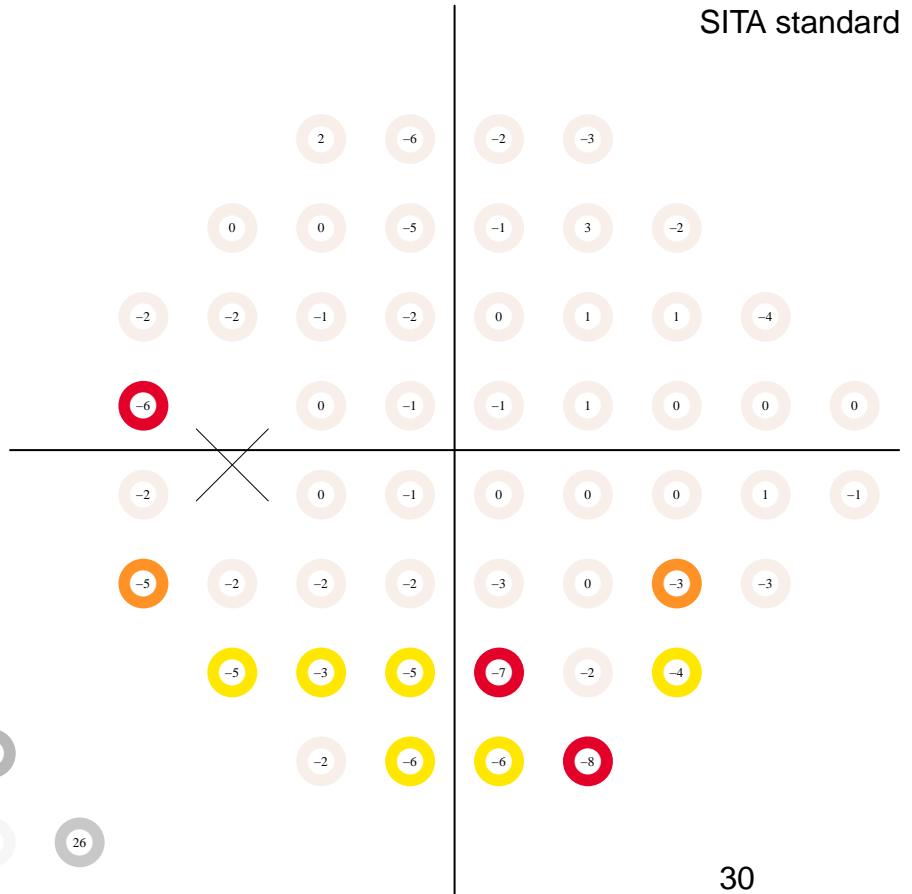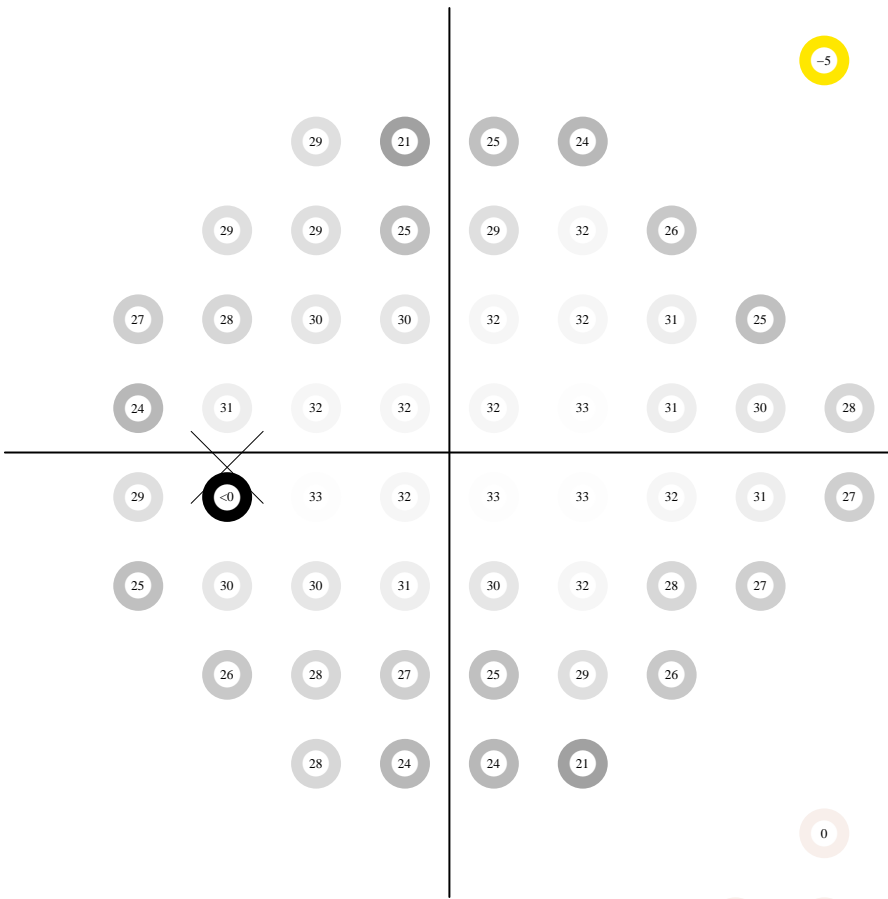

pattern deviation

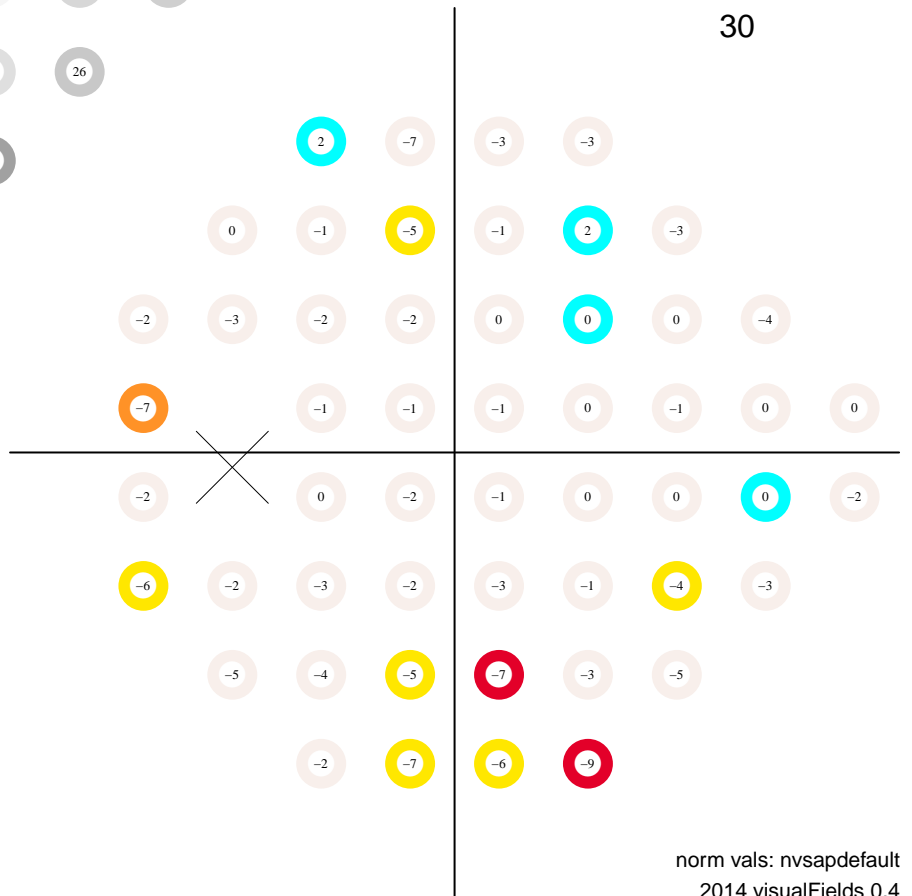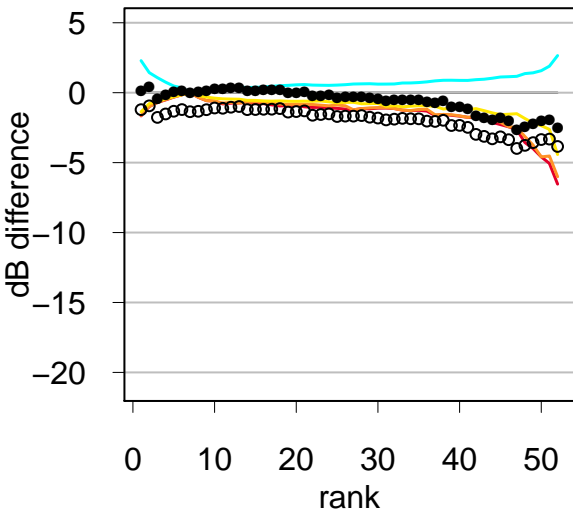

# Static Automated Perimetry. Single field analysis

Subject ID: 1029, age: 51, eye: OS (left)

Date: 05/17/2010 at 6:45:

Duration: 04:04, pause: 00:00

false positives 0.0 %

false negatives 1.0 %

fixation losses 0.0 %

MS 30.7 dB

MD -0.2 dB (p < 95 %)

PSD 1.9 dB (p < 95 %)

VFI 99.1 % (p < 95 %)

GH 1.8 dB

total deviation

Central 24-2  
SITA standard

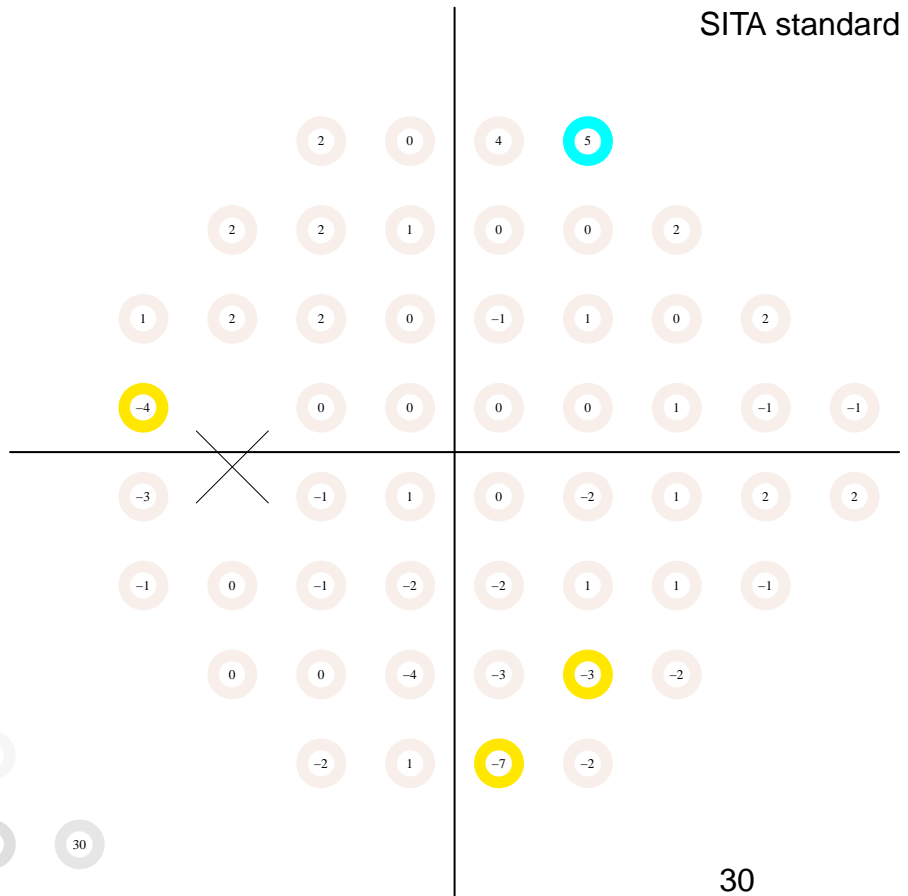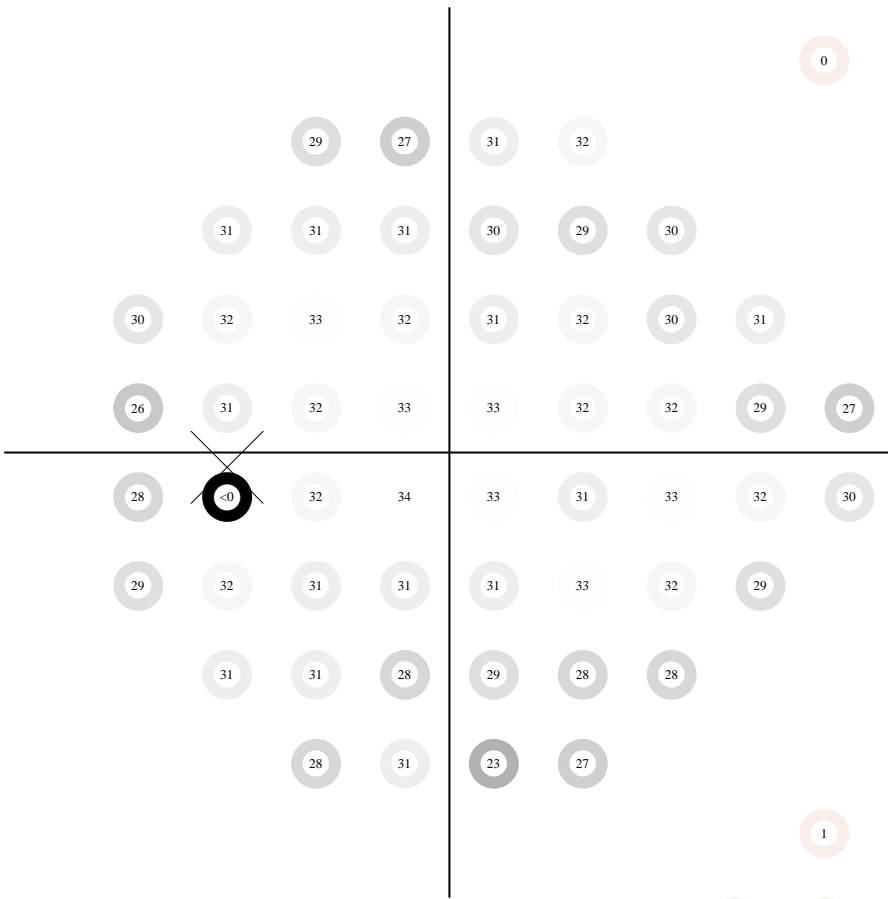

pattern deviation

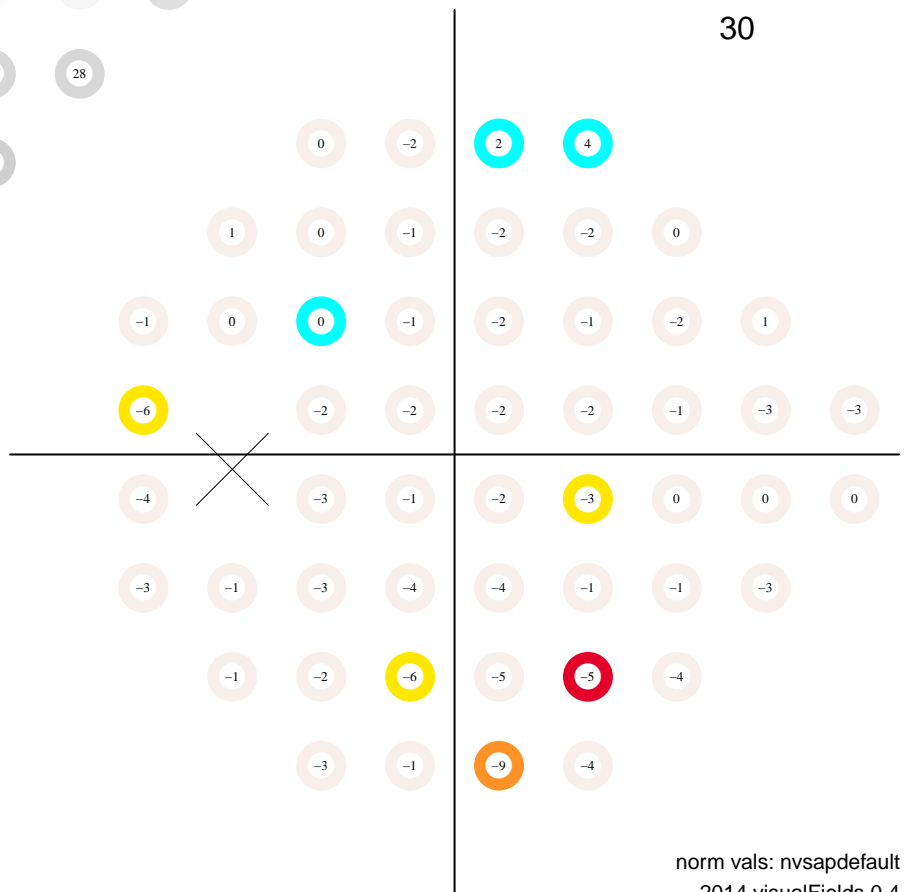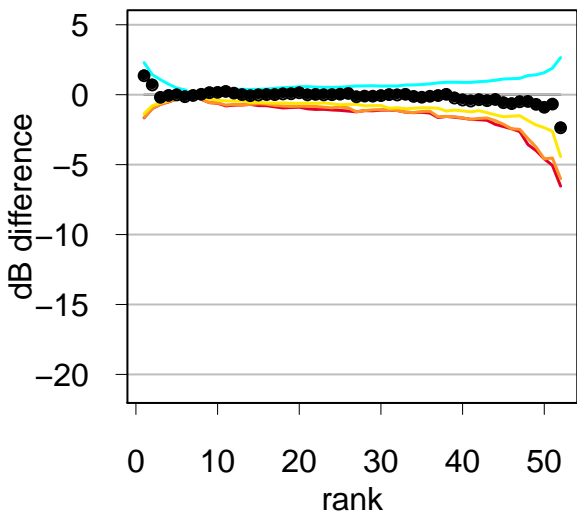

# Static Automated Perimetry. Single field analysis

Subject ID: 1029, age: 52, eye: OS (left)

Date: 05/09/2011 at 13:58

Duration: 04:25, pause: 00:00

false positives 1.0 %

false negatives 0.0 %

fixation losses 7.1 %

MS 29.3 dB

MD -1.5 dB (p < 95 %)

PSD 2.3 dB (p < 95 %)

VFI 95.9 % (p < 1 %)

GH 1.8 dB

total deviation

Central 24-2  
SITA standard

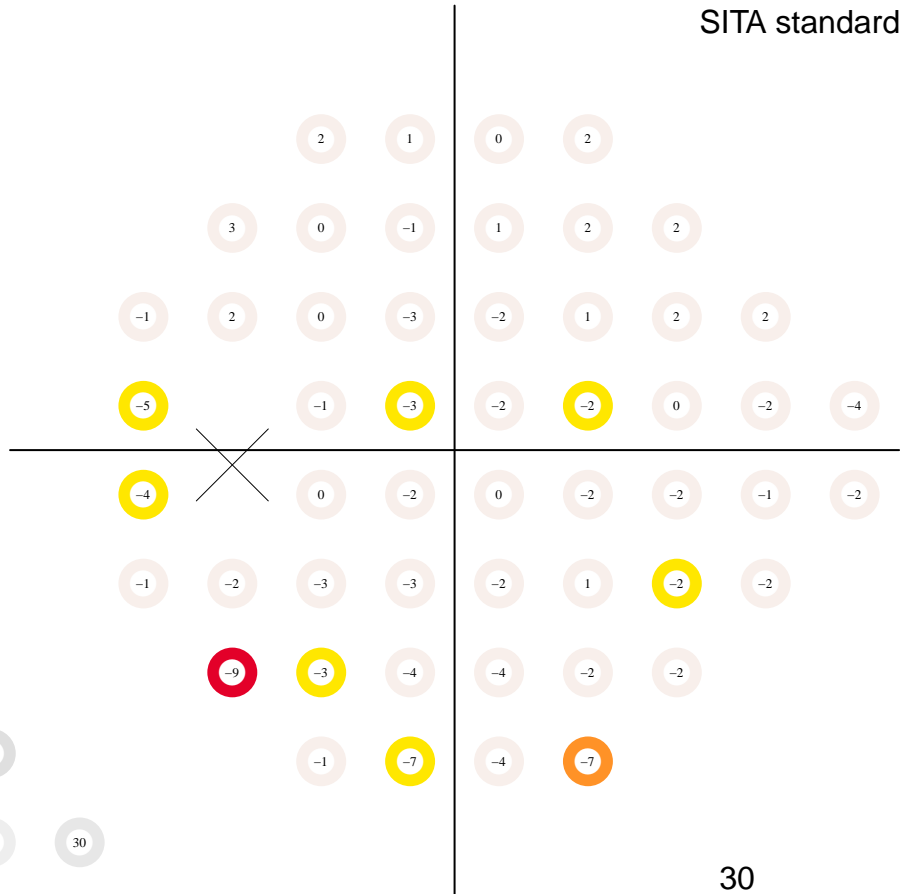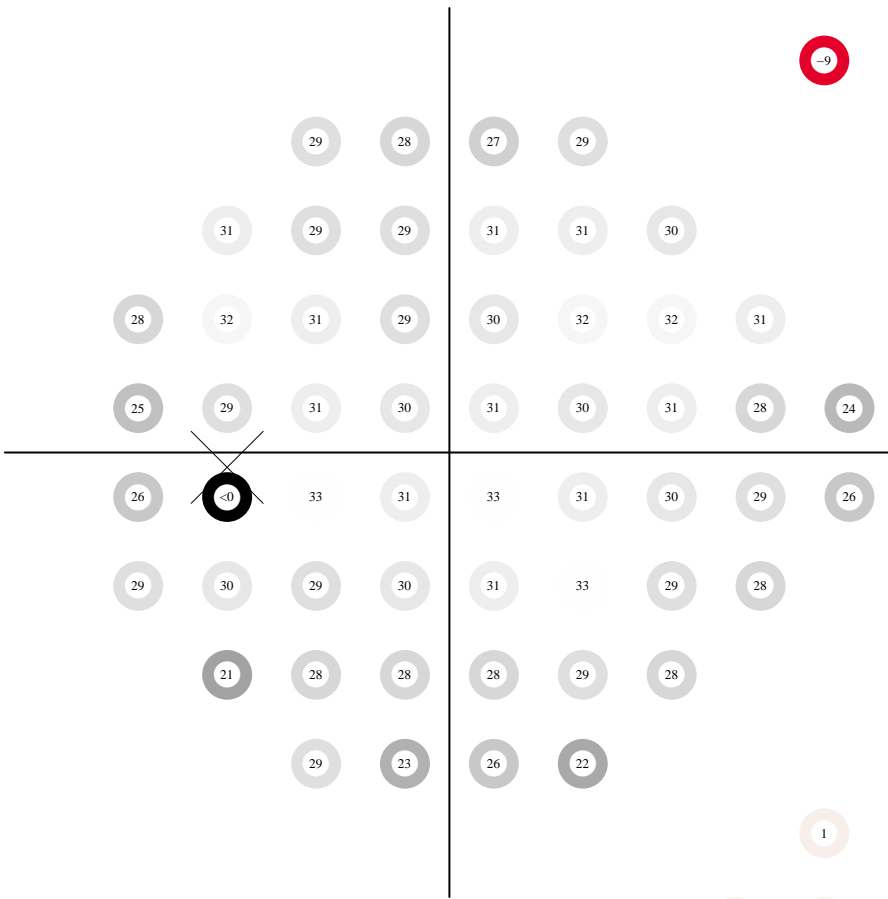

pattern deviation

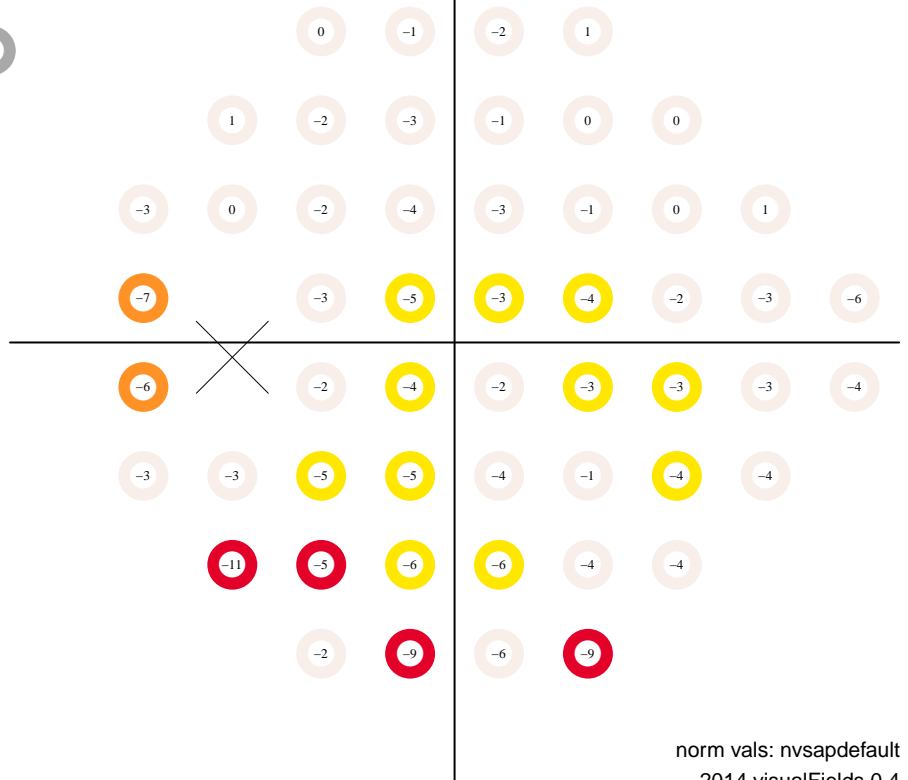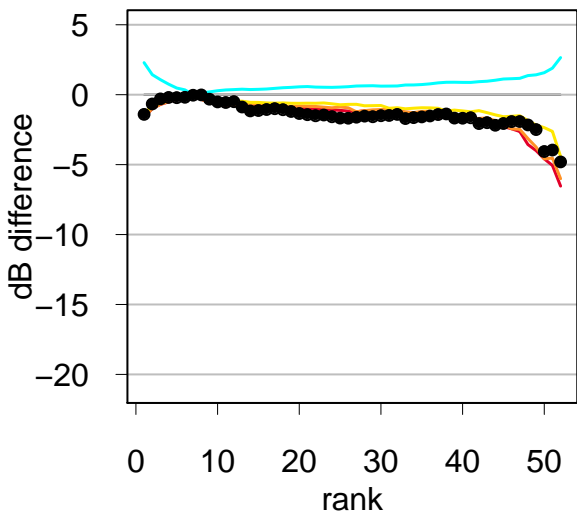

# Static Automated Perimetry. Single field analysis

Subject ID: 1029, age: 52, eye: OS (left)

Date: 08/16/2011 at 14:55

Duration: 04:37, pause: 00:00

false positives 0.0 %

false negatives 0.0 %

fixation losses 0.0 %

MS 29.9 dB

MD -1.0 dB (p < 95 %)

PSD 2.0 dB (p < 95 %)

VFI 98.8 % (p < 95 %)

GH 1.4 dB

total deviation

Central 24-2  
SITA standard

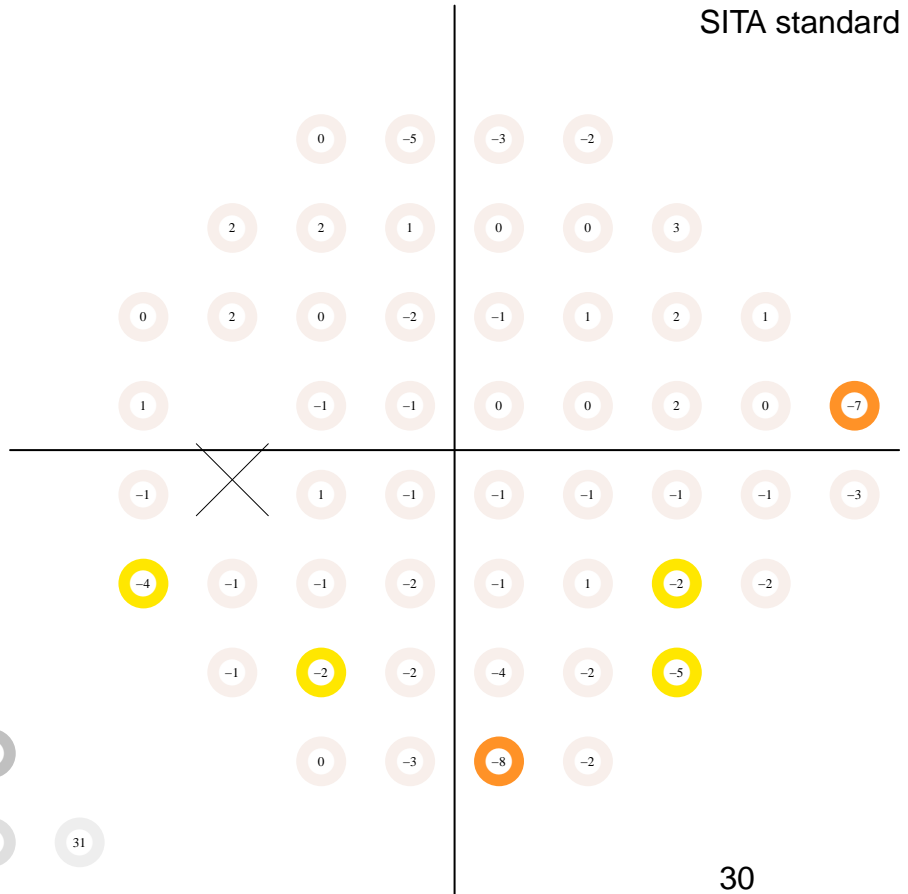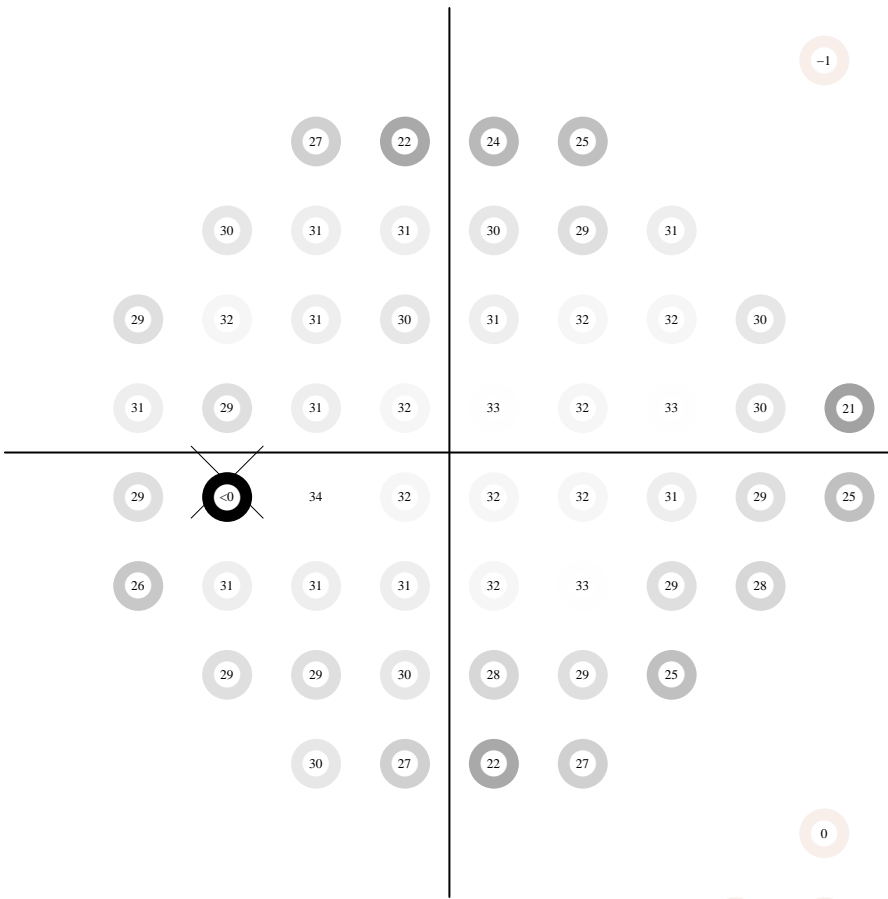

pattern deviation

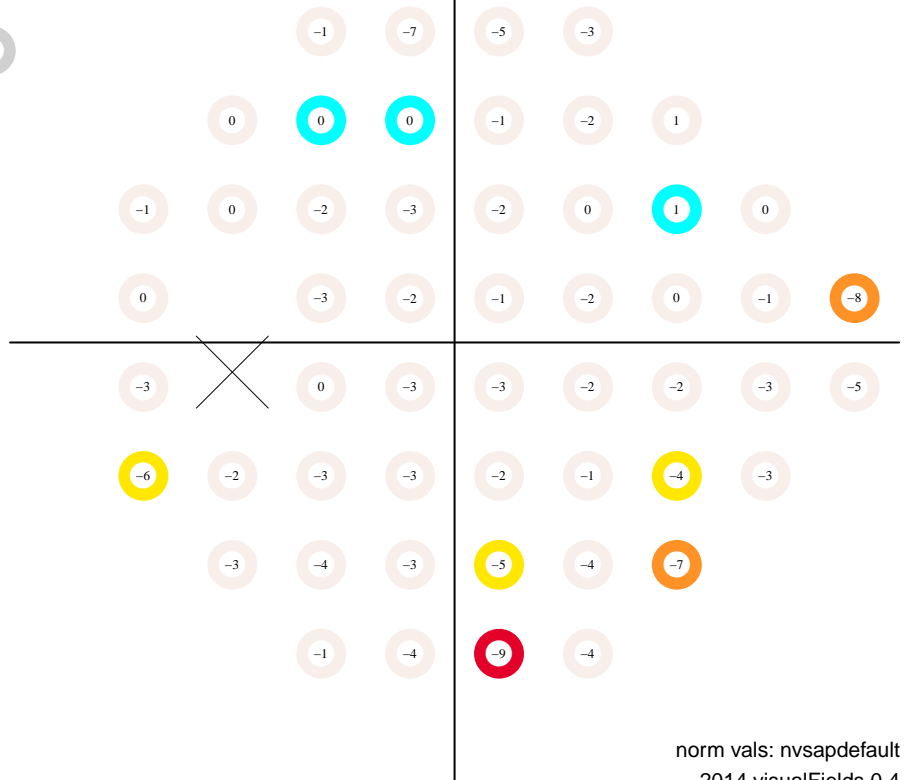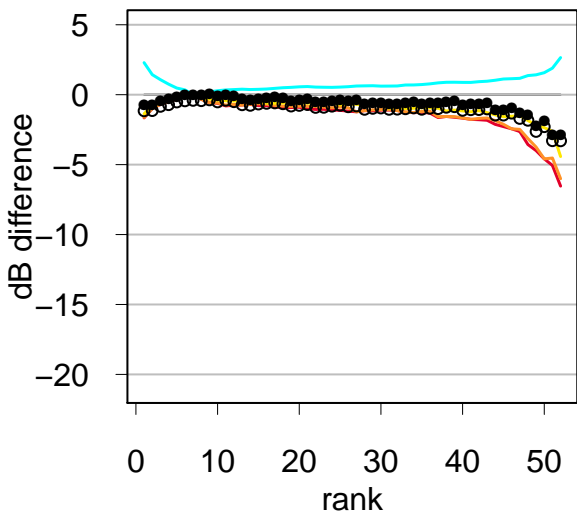

# Static Automated Perimetry. Single field analysis

Subject ID: 1029, age: 52, eye: OS (left)

Date: 11/15/2011 at 15:37

Duration: 04:14, pause: 00:00

false positives 0.0 %

false negatives 3.0 %

fixation losses 14.3 %

MS 29.4 dB

MD -1.5 dB (p < 95 %)

PSD 2.3 dB (p < 95 %)

VFI 98.4 % (p < 95 %)

GH 0.3 dB

total deviation

Central 24-2  
SITA standard

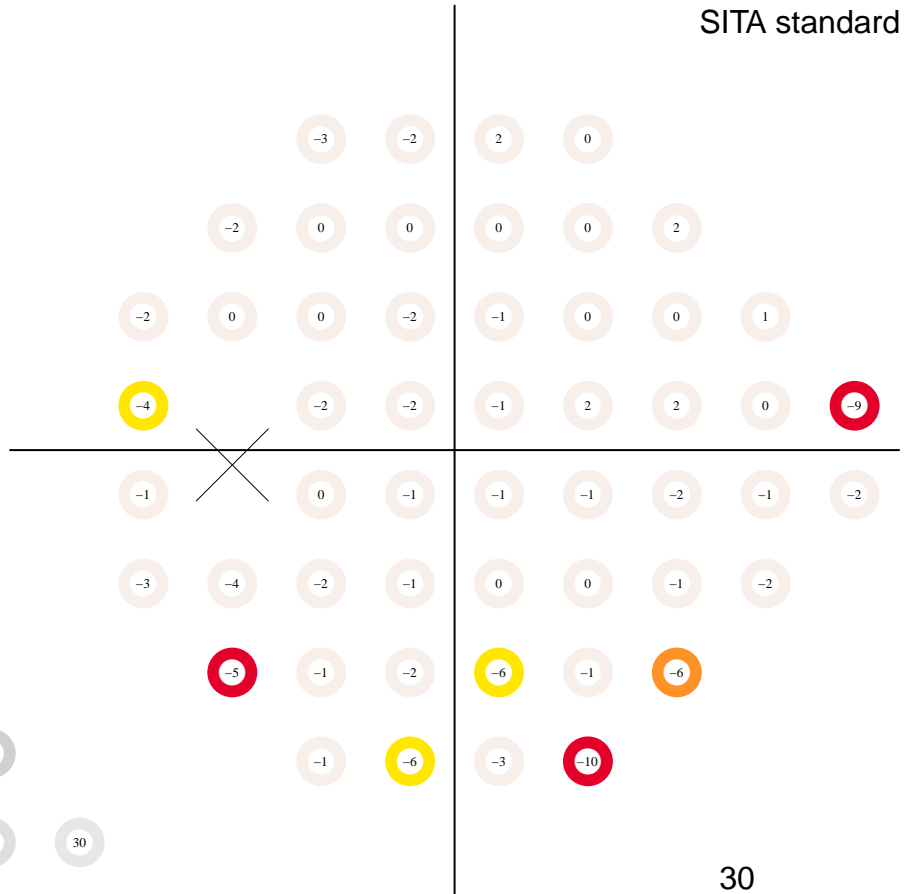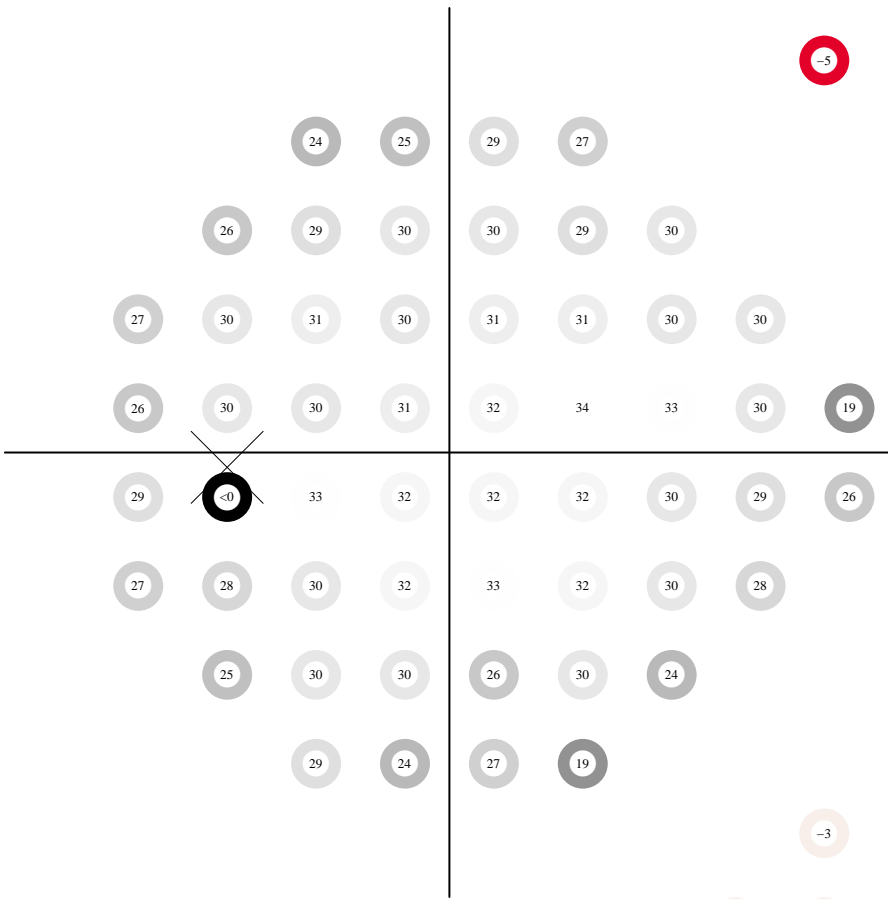

pattern deviation

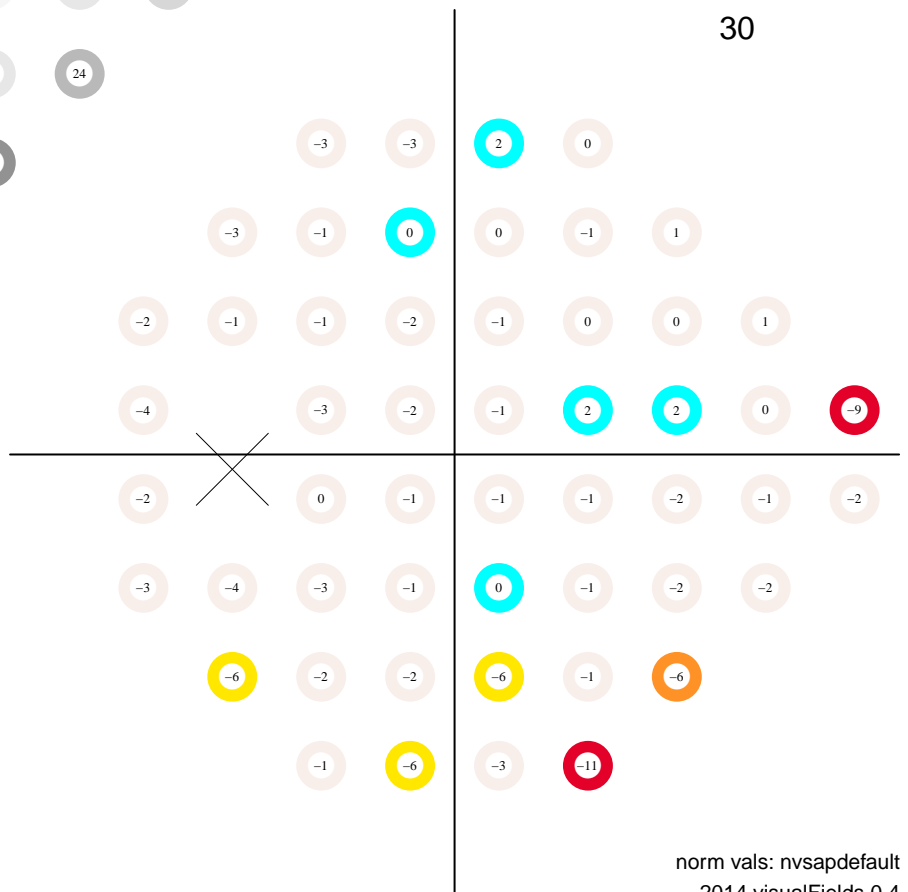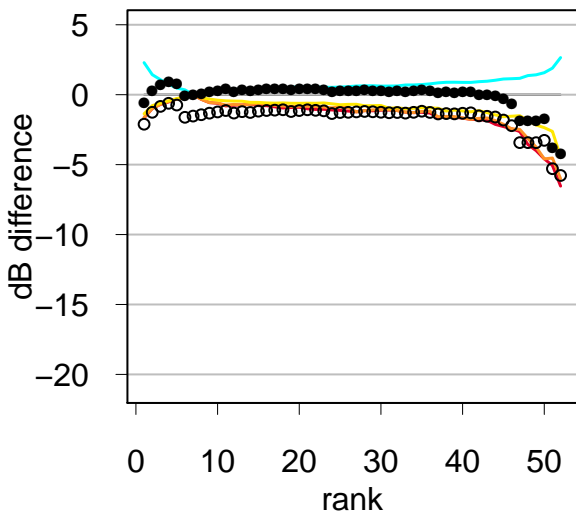

# Static Automated Perimetry. Single field analysis

Subject ID: 1029, age: 53, eye: OS (left)

Date: 02/28/2012 at 15:41

Duration: 04:14, pause: 00:00

false positives 0.0 %

false negatives 0.0 %

fixation losses 0.0 %

MS 30.7 dB

MD -0.0 dB (p < 95 %)

PSD 1.9 dB (p < 95 %)

VFI 99.2 % (p < 95 %)

GH 2.3 dB

total deviation

Central 24-2  
SITA standard

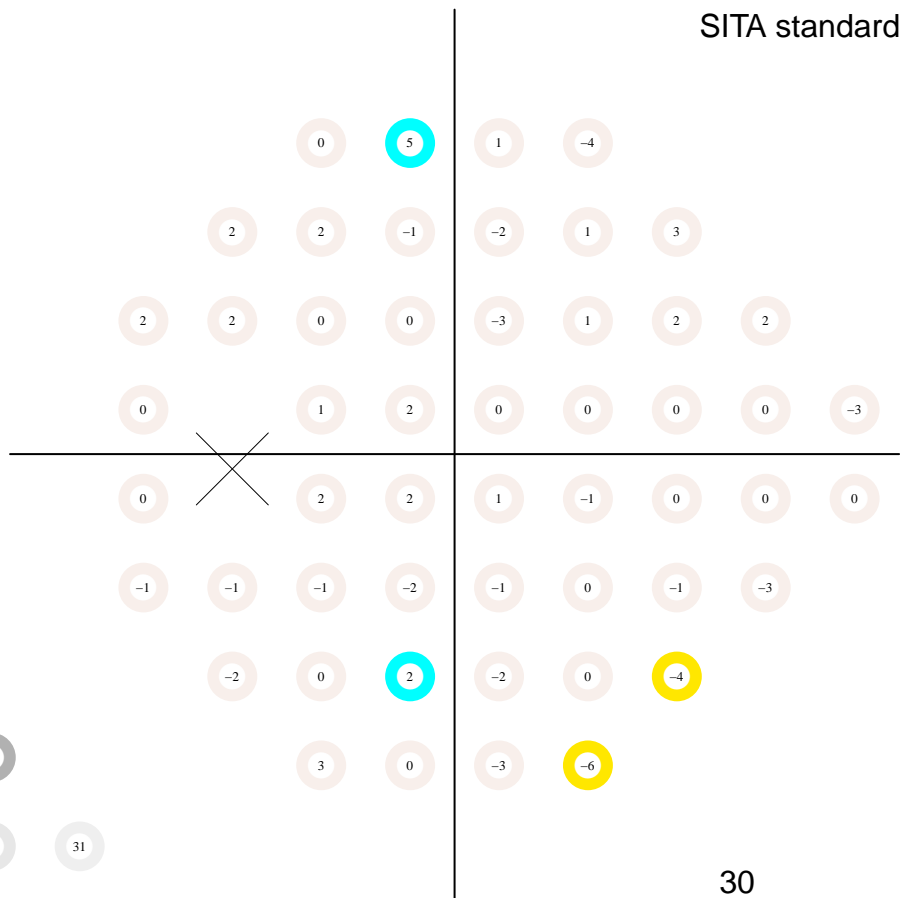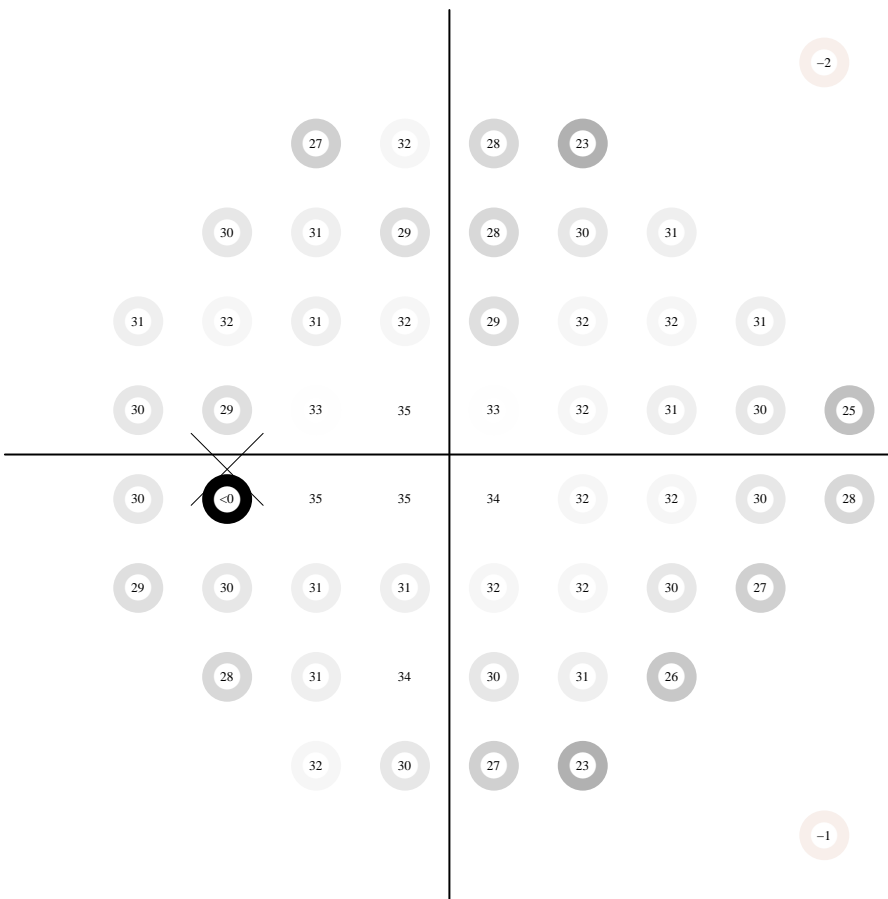

pattern deviation

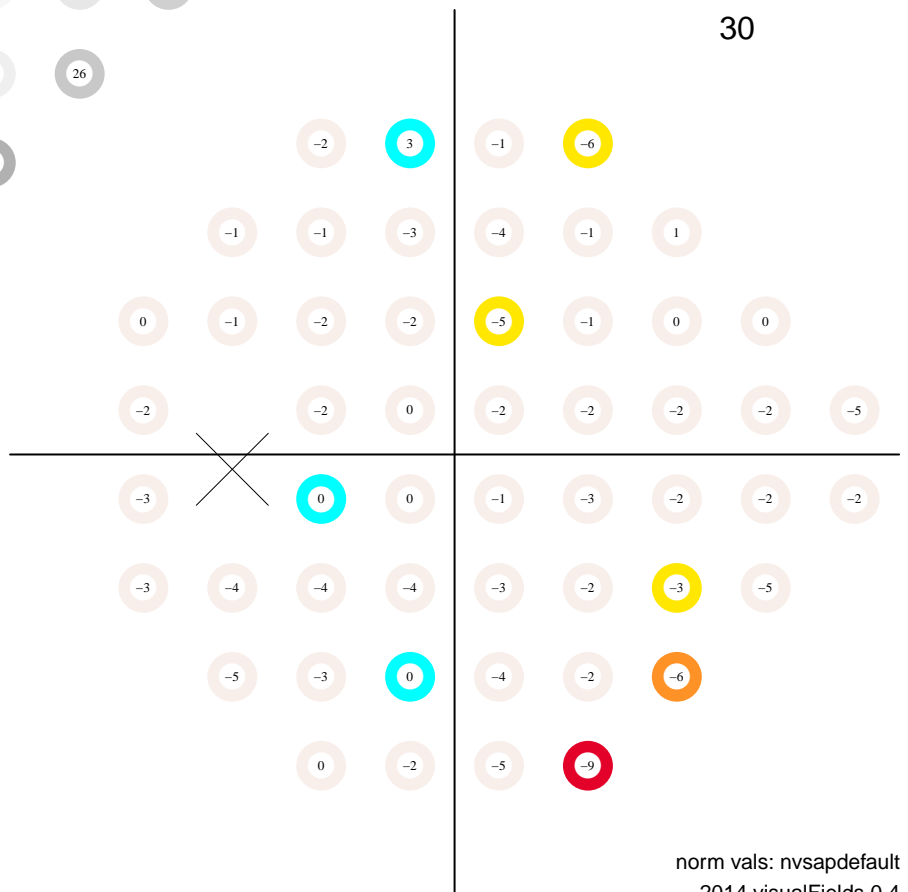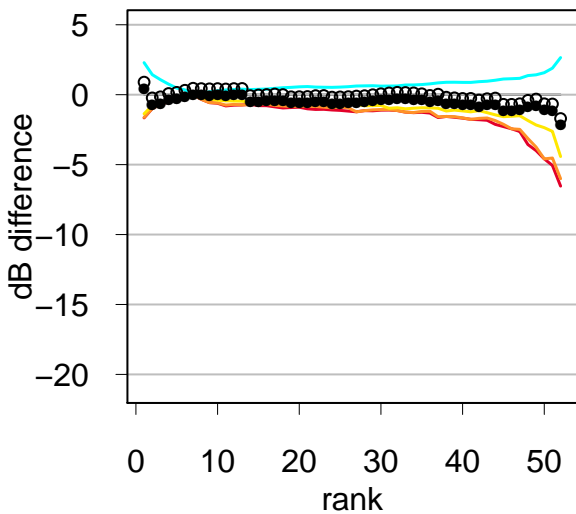

# Static Automated Perimetry. Single field analysis

Subject ID: 1029, age: 53, eye: OS (left)

Date: 05/15/2012 at 15:06

Duration: 04:32, pause: 00:00

false positives 2.0 %

false negatives 0.0 %

fixation losses 0.0 %

MS 29.6 dB

MD -1.2 dB (p < 95 %)

PSD 2.5 dB (p < 95 %)

VFI 97.1 % (p < 5 %)

GH 1.8 dB

total deviation

Central 24-2  
SITA standard

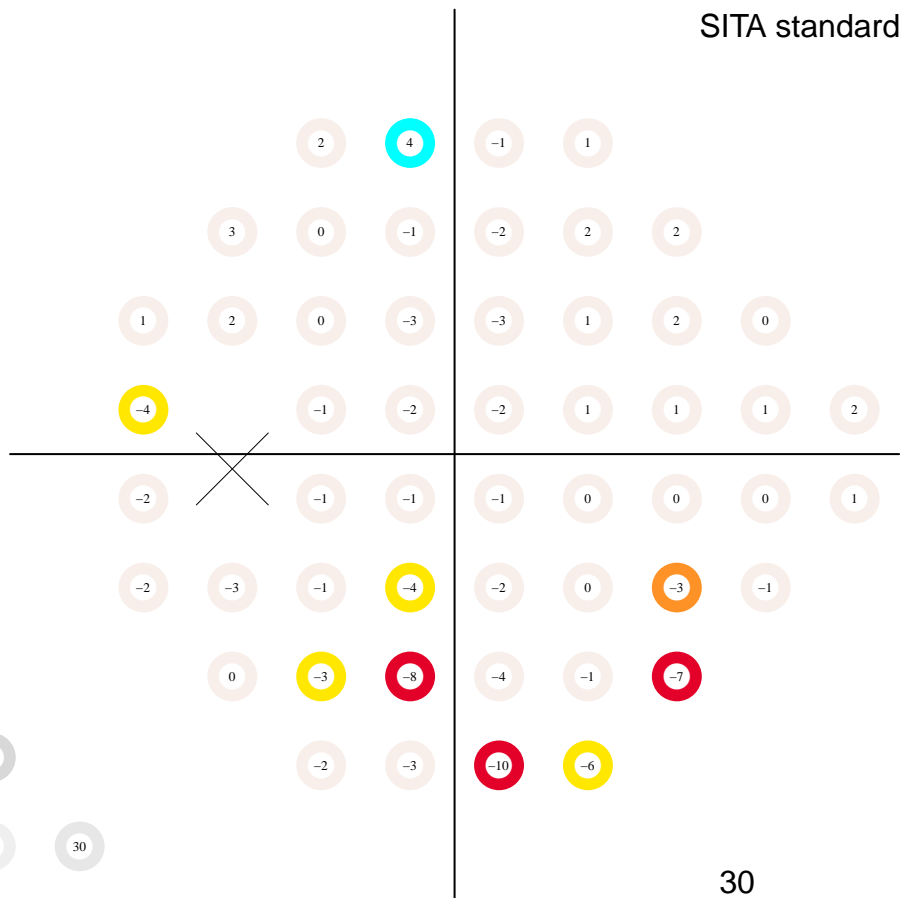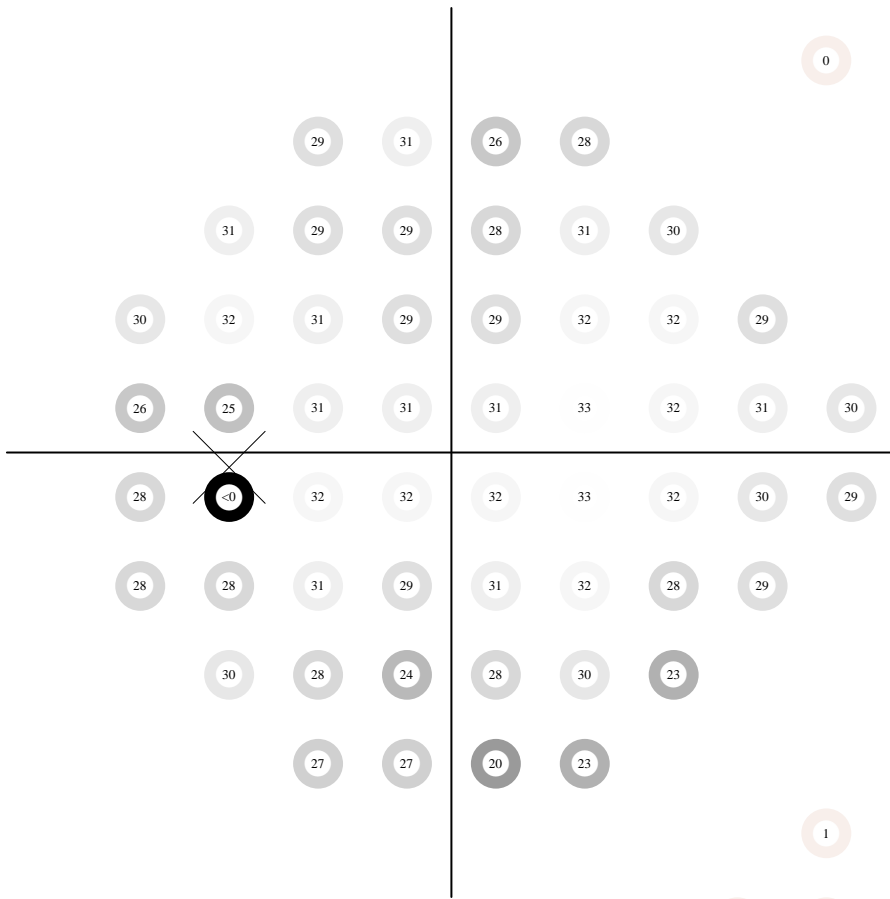

pattern deviation

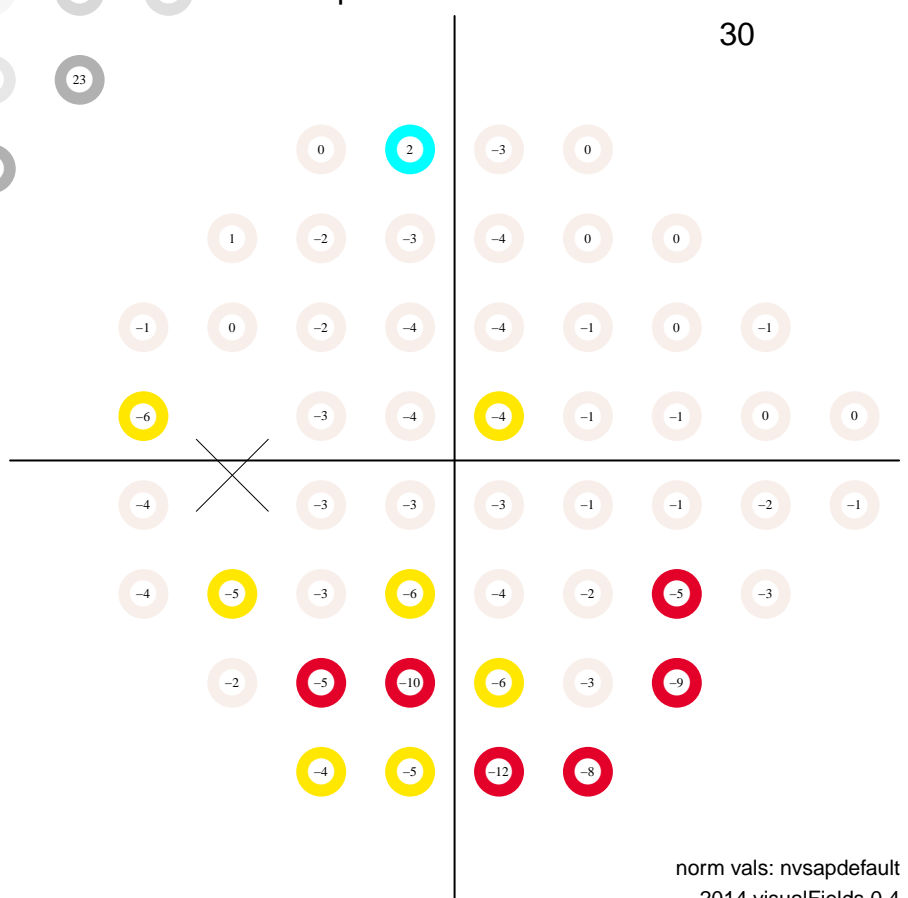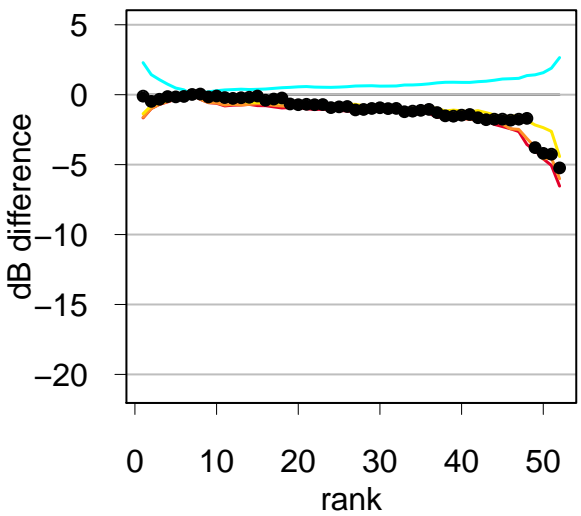



# Static Automated Perimetry. Single field analysis

Subject ID: 1029, age: 53, eye: OS (left)

Date: 06/04/2012 at 7:08:

Duration: 04:24, pause: 00:00

false positives 0.0 %

false negatives 0.0 %

fixation losses 0.0 %

MS 29.7 dB

MD -1.1 dB (p < 95 %)

PSD 2.1 dB (p < 95 %)

VFI 98.7 % (p < 95 %)

GH 1.0 dB

total deviation

Central 24-2  
SITA standard

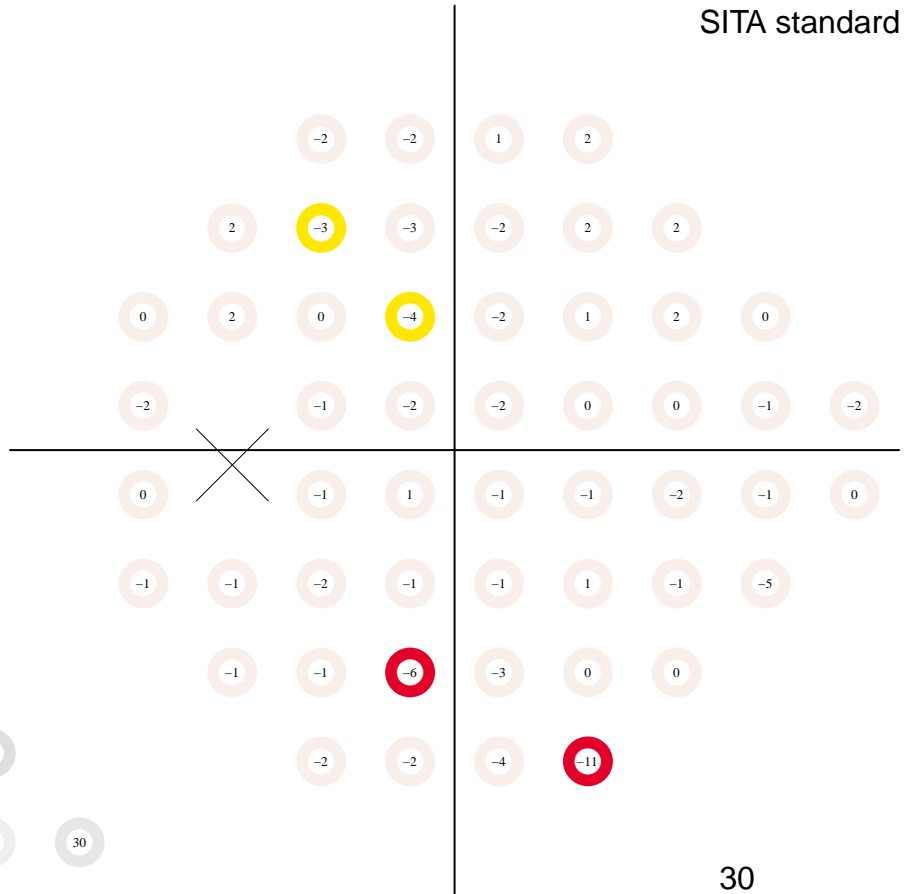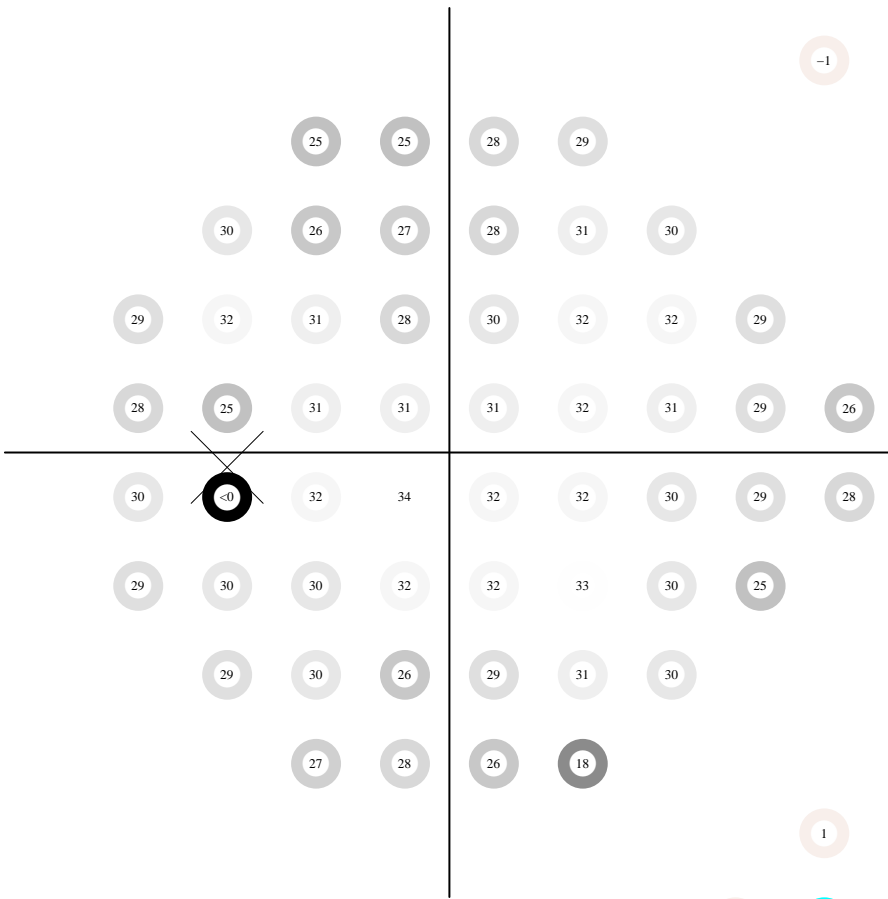

pattern deviation

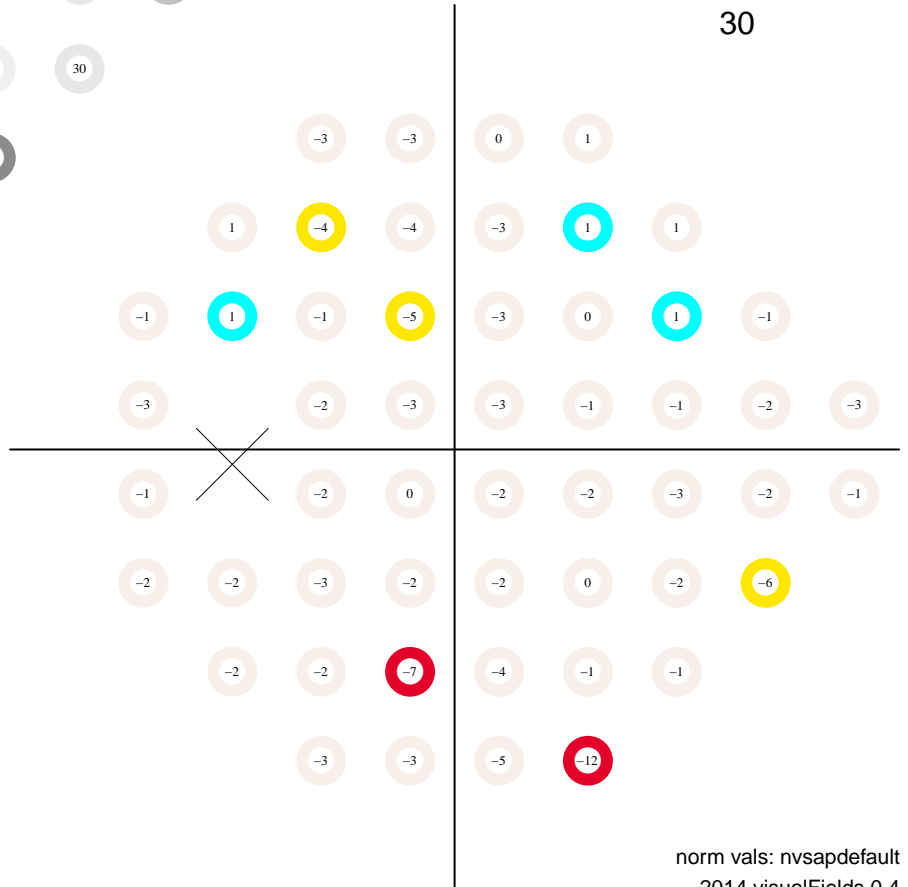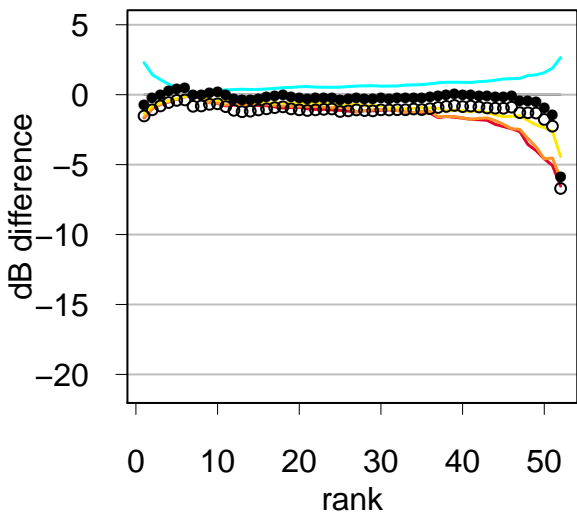

# Static Automated Perimetry. Single field analysis

Subject ID: 1029, age: 54, eye: OS (left)

Date: 01/28/2013 at 16:44

Duration: 04:31, pause: 00:00

false positives 2.0 %

false negatives 0.0 %

fixation losses 0.0 %

MS 30.1 dB

MD -0.6 dB (p < 95 %)

PSD 2.4 dB (p < 95 %)

VFI 98.5 % (p < 95 %)

GH 1.9 dB

total deviation

Central 24-2  
SITA standard

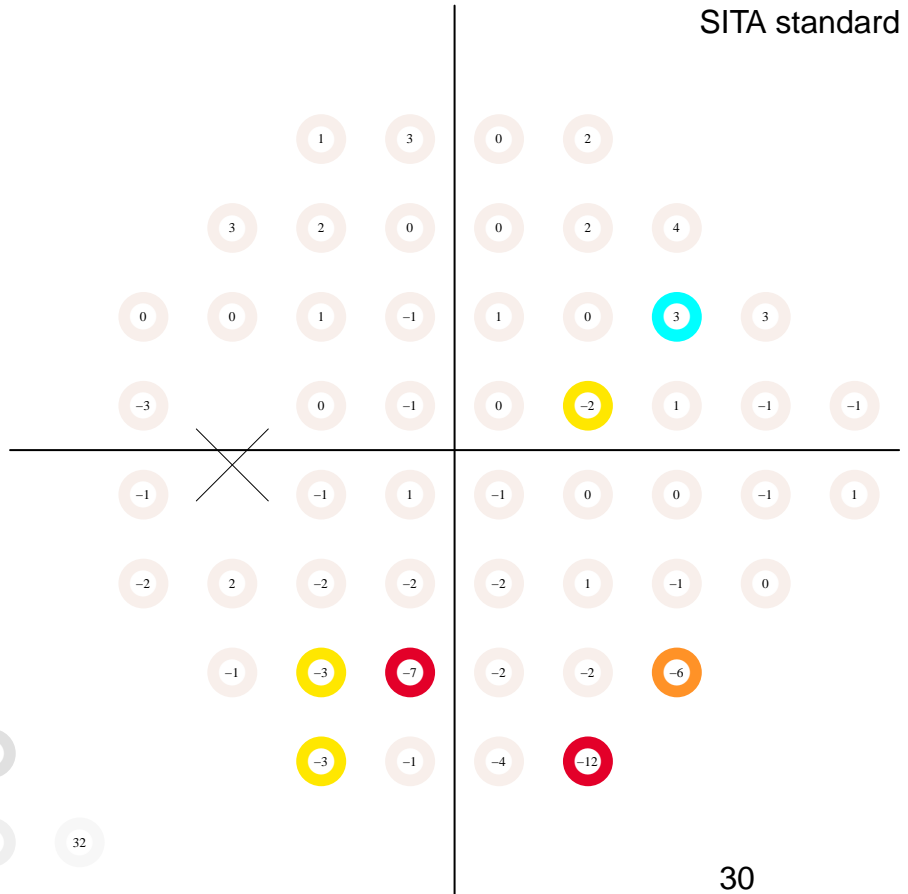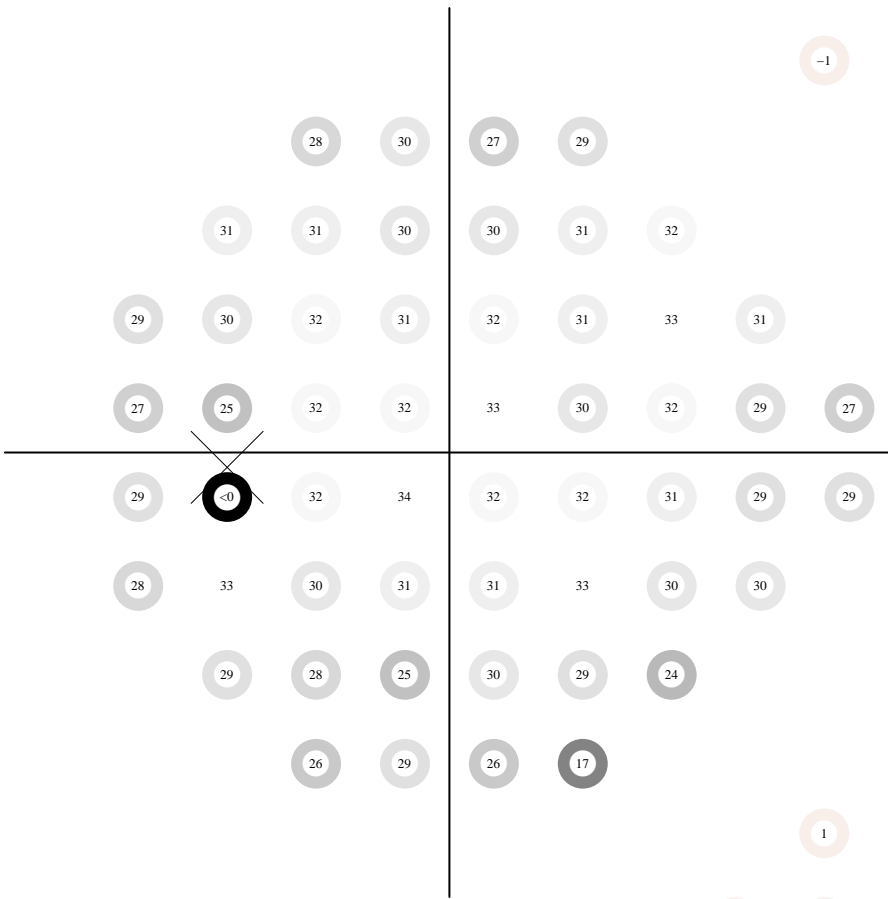

pattern deviation

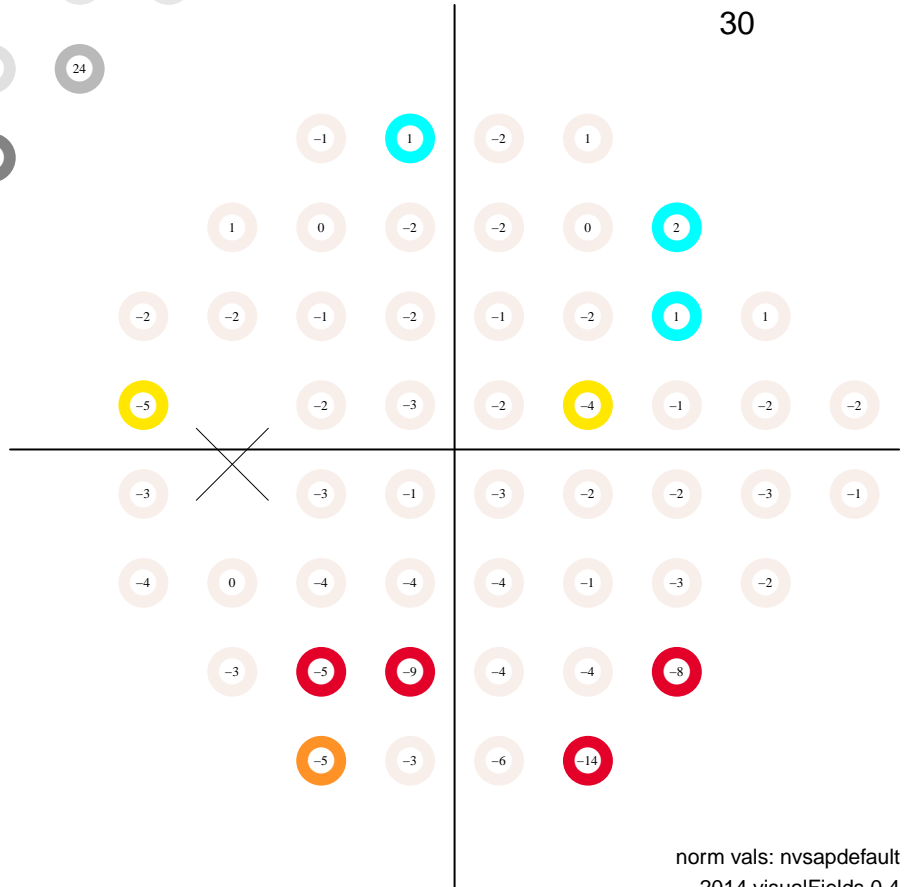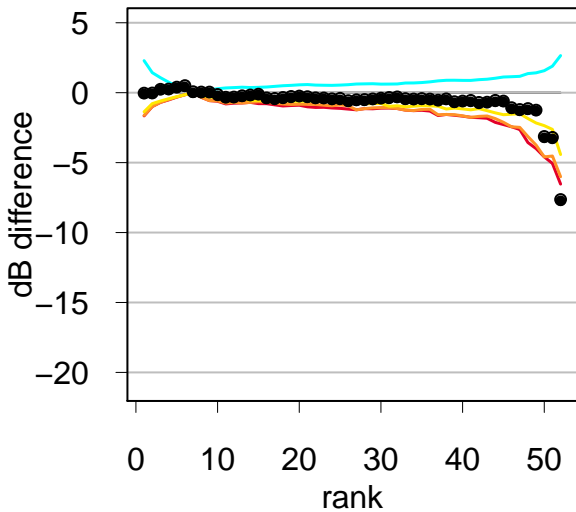

# Static Automated Perimetry. Single field analysis

Subject ID: 1029, age: 54, eye: OS (left)

Date: 04/23/2013 at 15:36

Duration: 04:34, pause: 00:00

false positives 3.0 %

false negatives 0.0 %

fixation losses 0.0 %

MS 30.7 dB

MD -0.0 dB (p < 95 %)

PSD 1.6 dB (p < 95 %)

VFI 99.7 % (p < 95 %)

GH 2.0 dB

total deviation

Central 24-2  
SITA standard

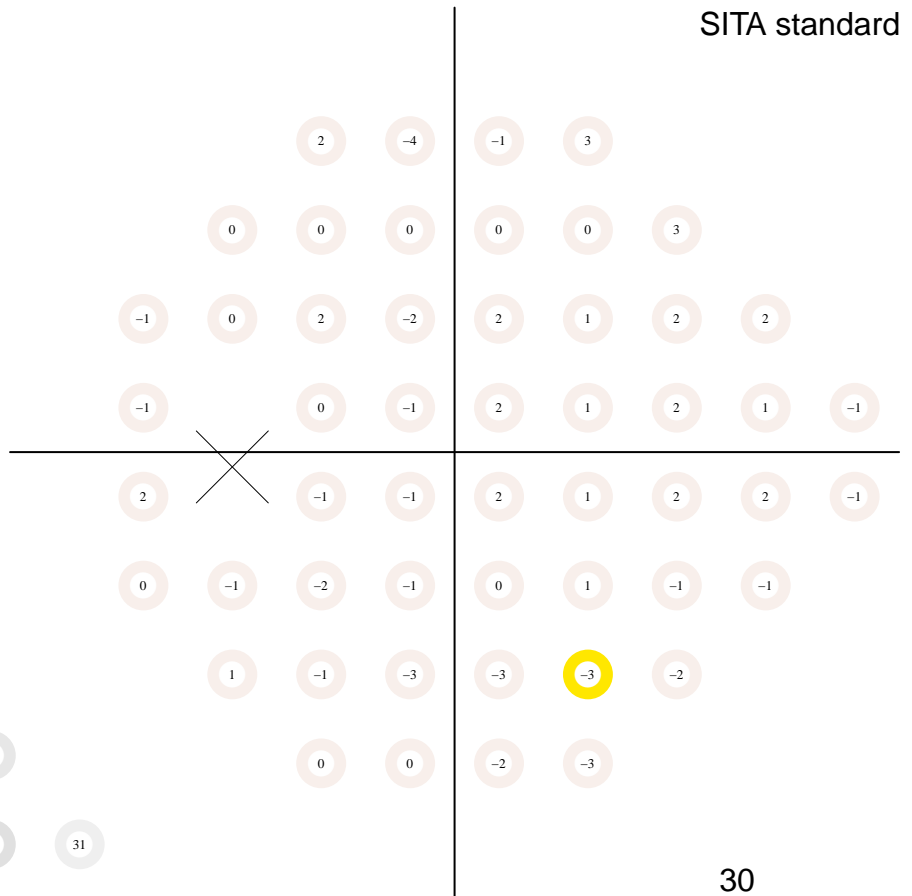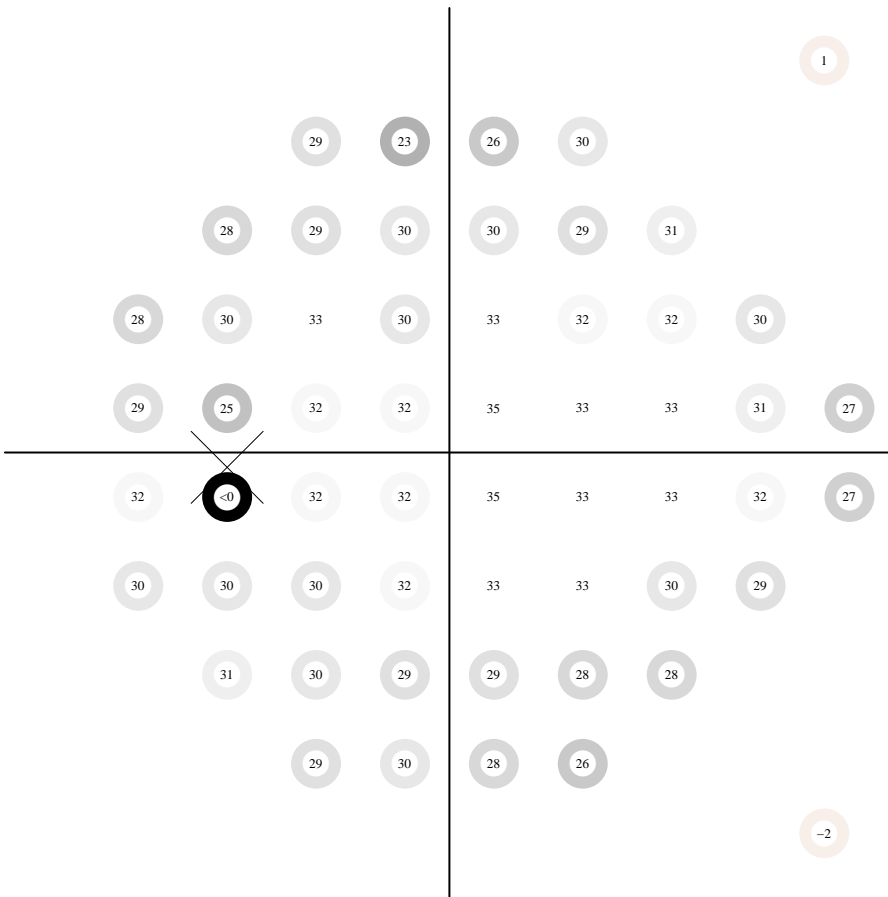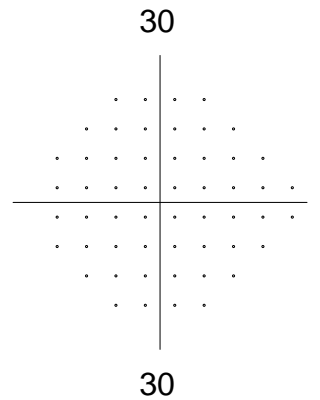

pattern deviation

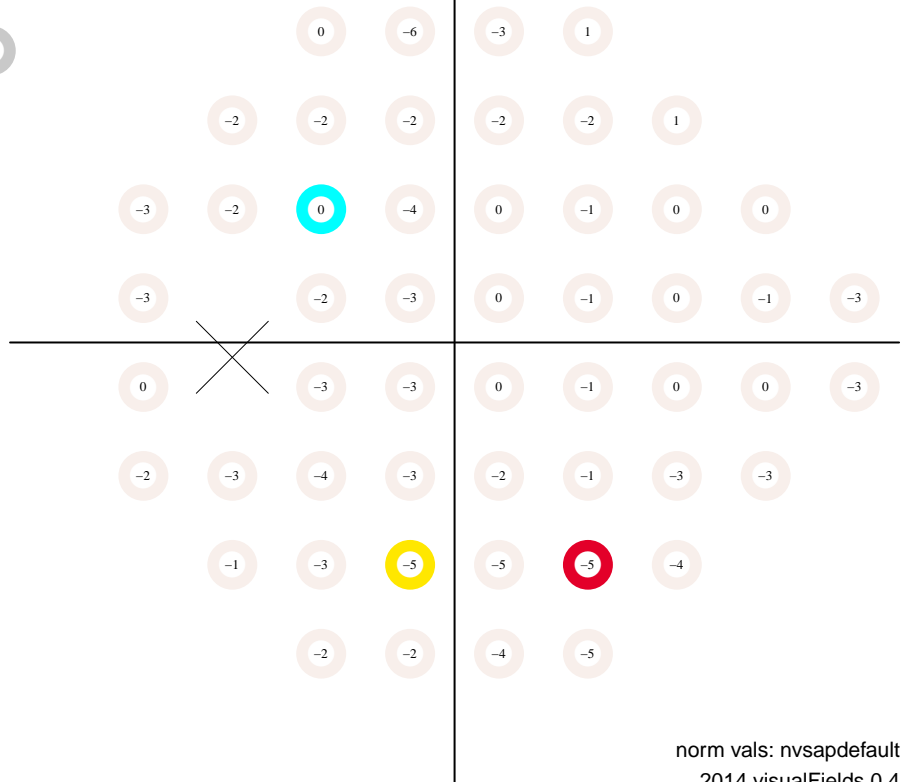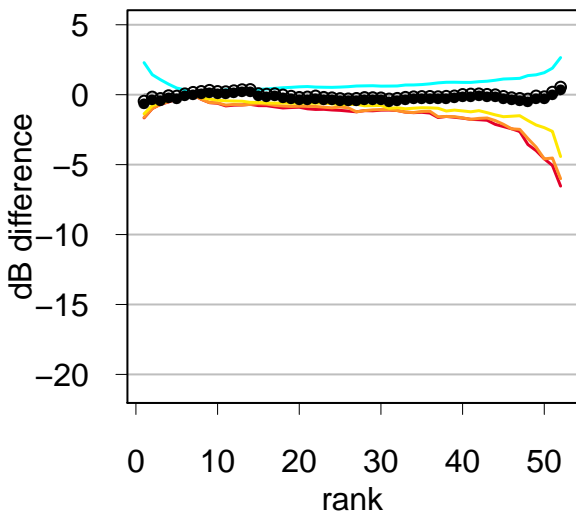

# Static Automated Perimetry. Single field analysis

Subject ID: 1034, age: 62, eye: OS (left)

Date: 03/22/2006 at 9:58:

Duration: 06:43, pause: 00:00

false positives 1.0 %

false negatives 12.0 %

fixation losses 6.7 %

MS 25.7 dB

MD -4.6 dB (p < 0.5 %)

PSD 7.8 dB (p < 0.5 %)

VFI 87.9 % (p < 0.5 %)

GH 1.4 dB

total deviation

Central 24-2  
SITA standard

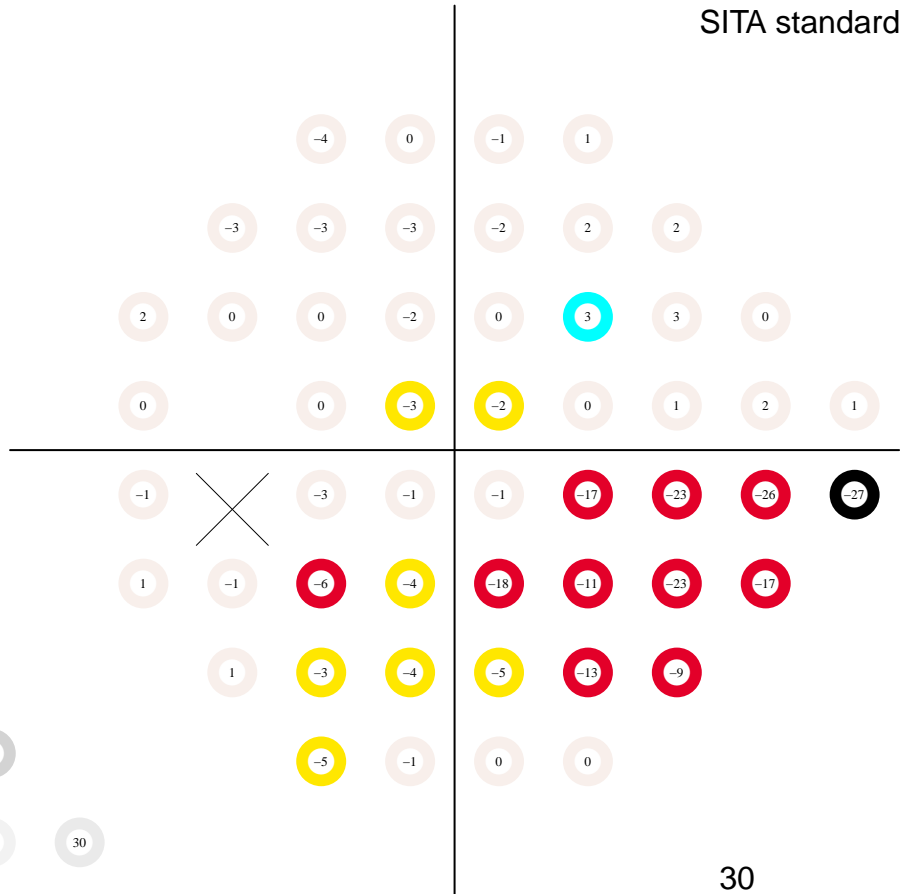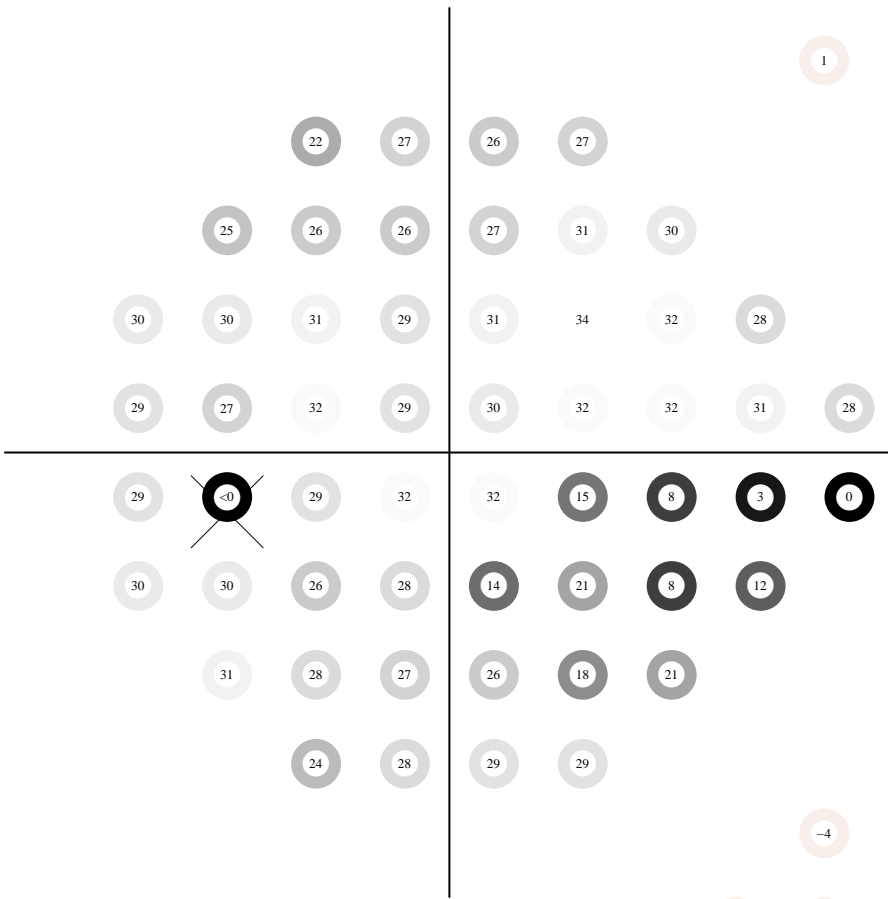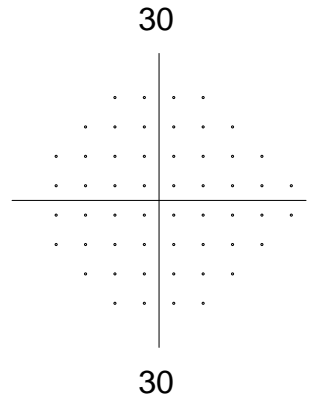

pattern deviation

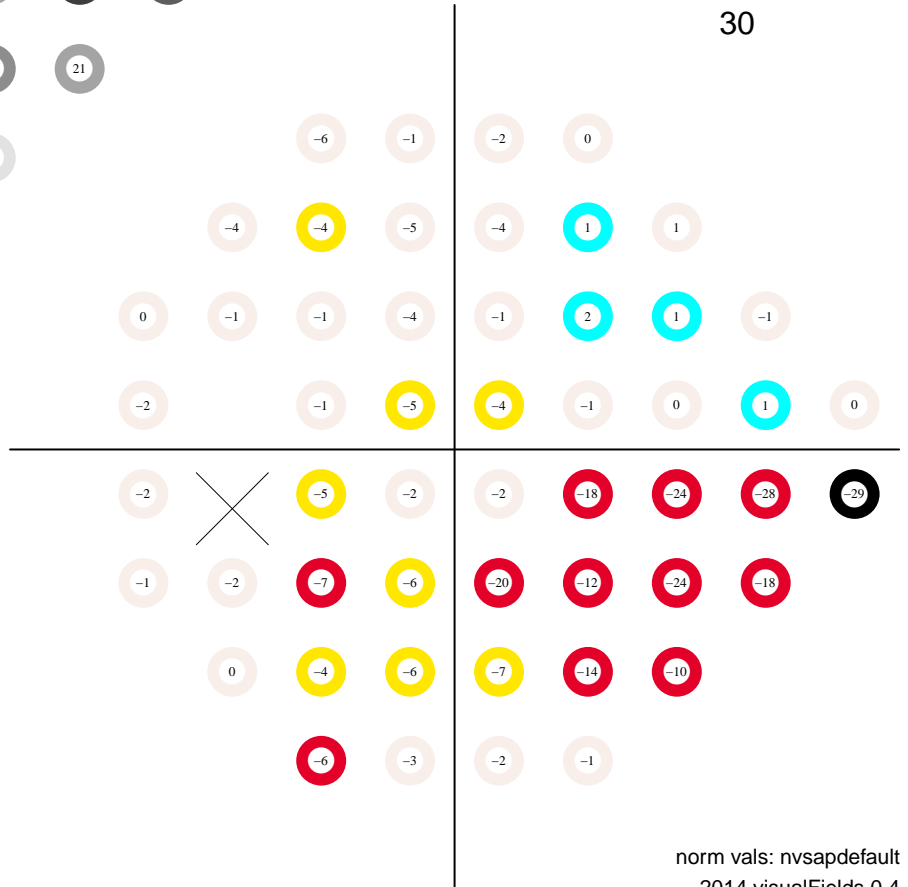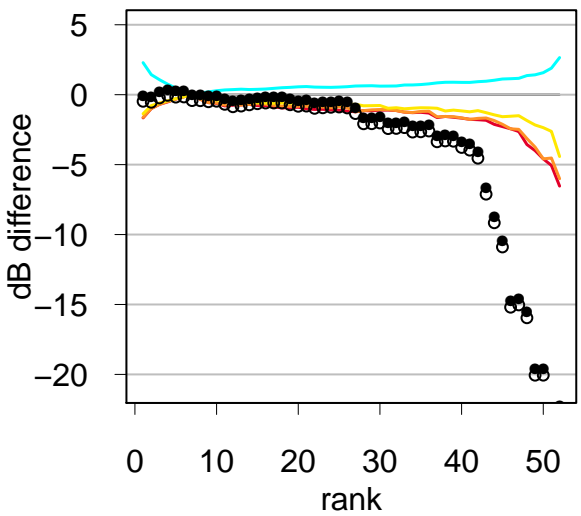

# Static Automated Perimetry. Single field analysis

Subject ID: 1034, age: 62, eye: OS (left)

Date: 07/07/2006 at 8:44:

Duration: 05:47, pause: 00:00

false positives 12.0 %

false negatives 0.0 %

fixation losses 28.6 %

MS 28.3 dB

MD -2.0 dB (p < 95 %)

PSD 6.5 dB (p < 95 %)

VFI 92.8 % (p < 0.5 %)

GH 3.1 dB

total deviation

Central 24-2  
SITA standard

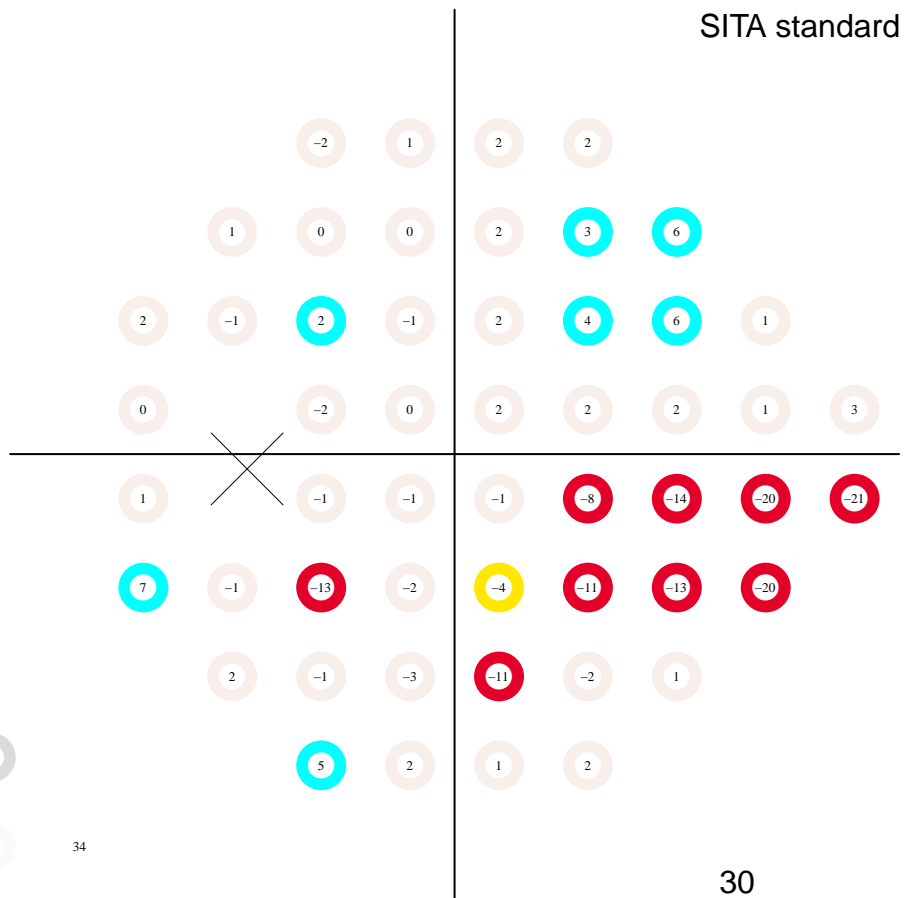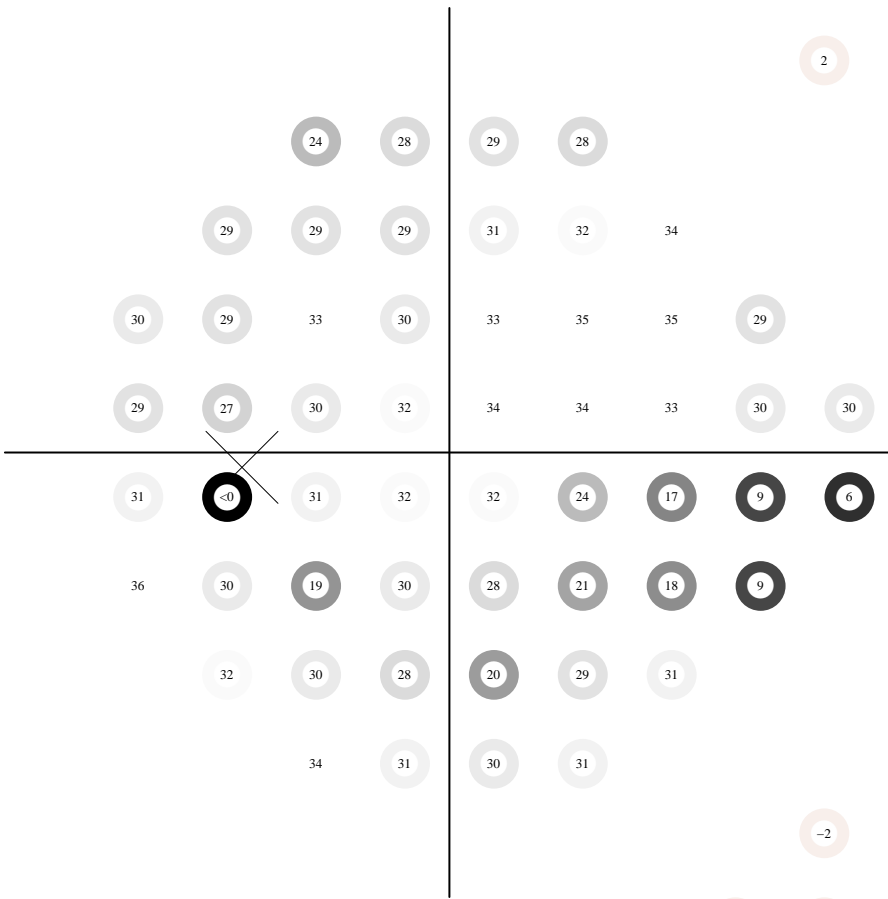

pattern deviation

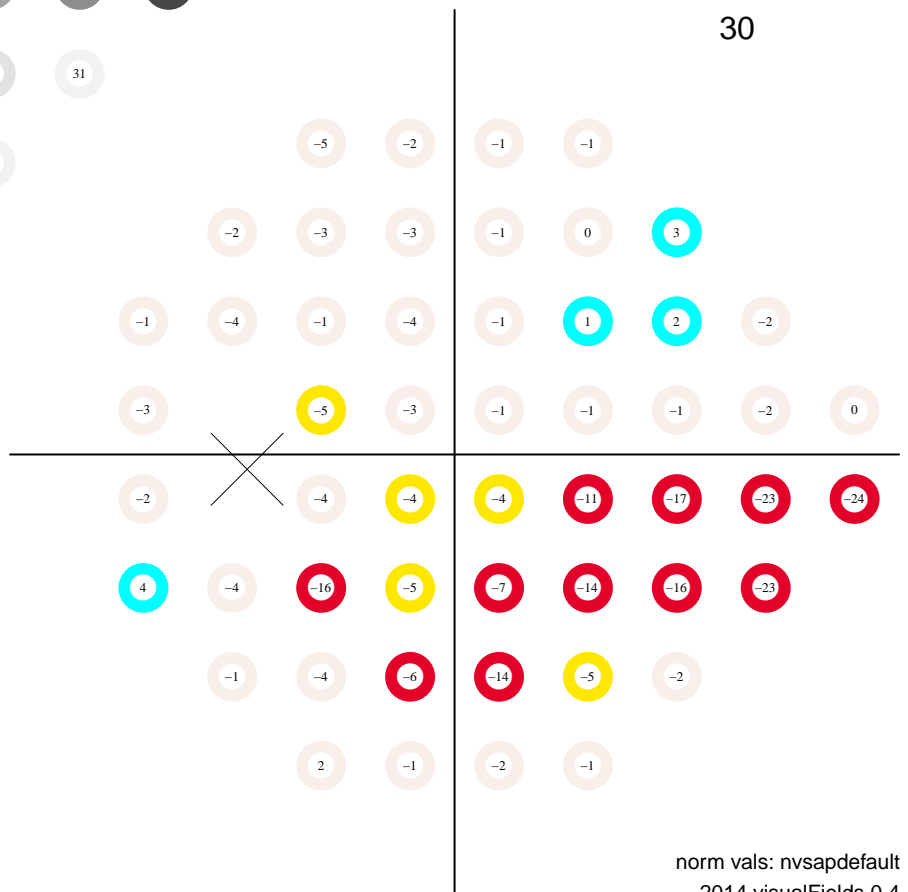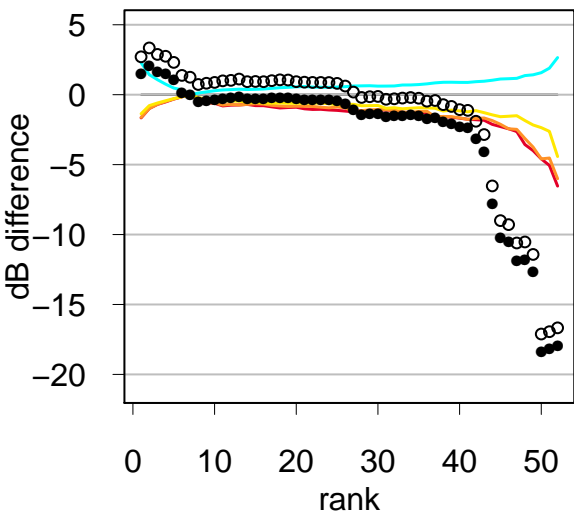

# Static Automated Perimetry. Single field analysis

Subject ID: 1034, age: 62, eye: OS (left)

Date: 11/01/2006 at 9:05:

Duration: 06:18, pause: 00:00

false positives 15.0 %

false negatives 15.0 %

fixation losses 31.2 %

MS 27.6 dB

MD -2.7 dB (p < 5 %)

PSD 7.6 dB (p < 5 %)

VFI 91.6 % (p < 0.5 %)

GH 2.5 dB

total deviation

Central 24-2  
SITA standard

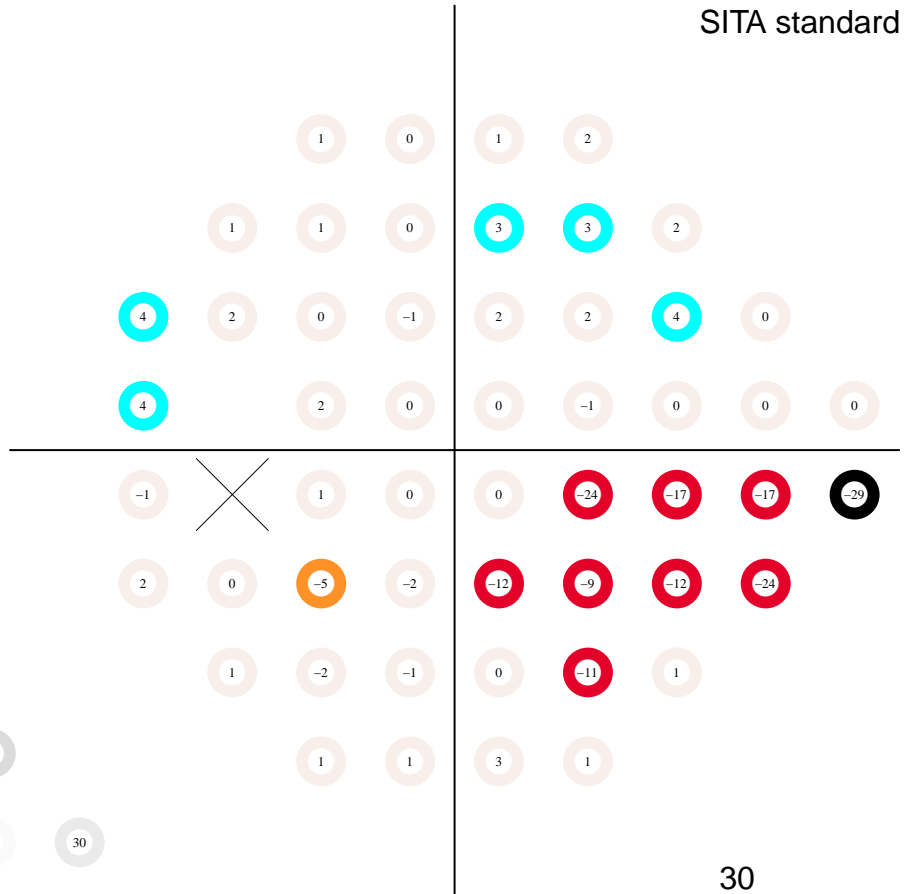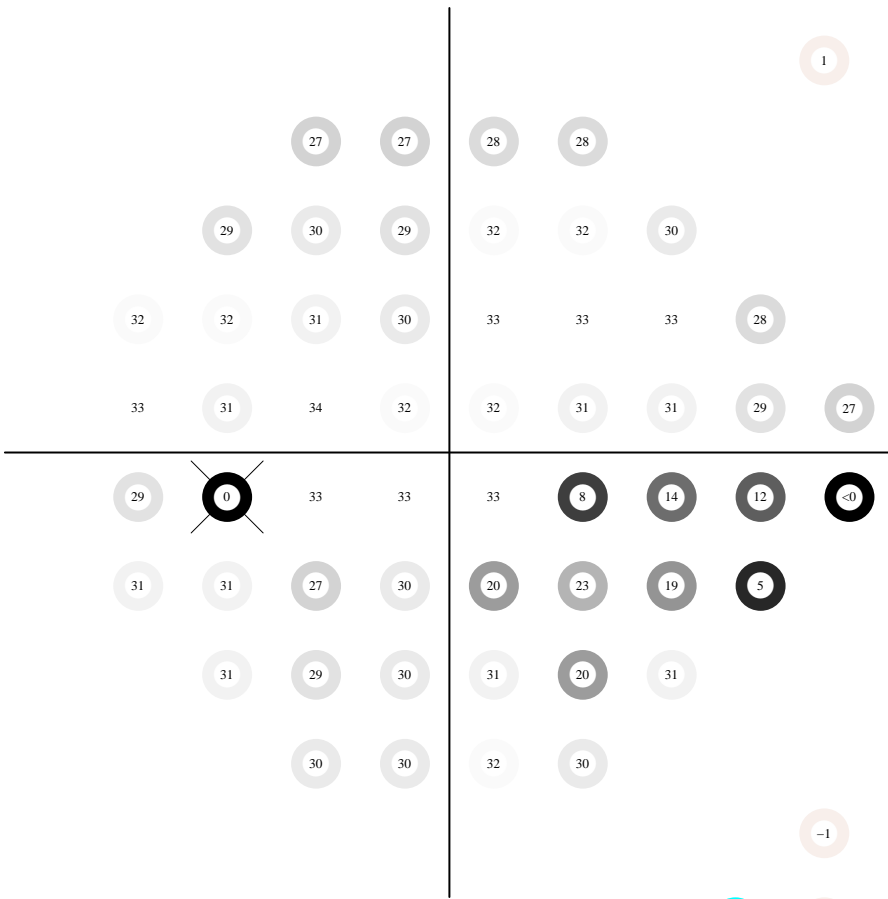

pattern deviation

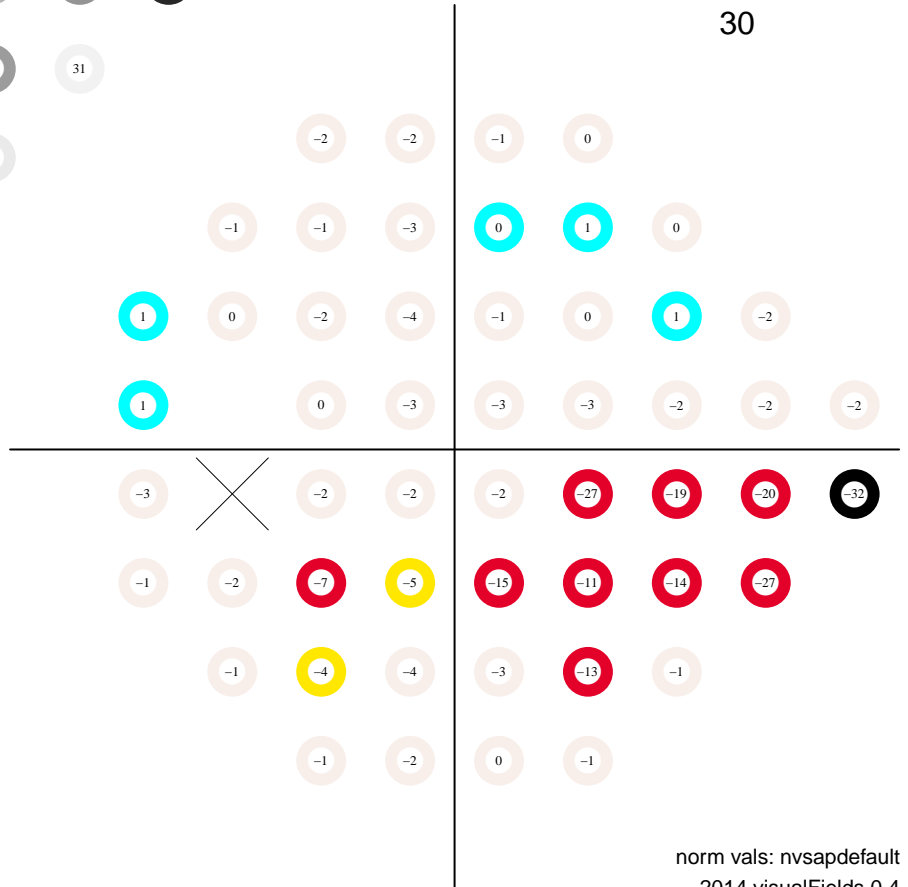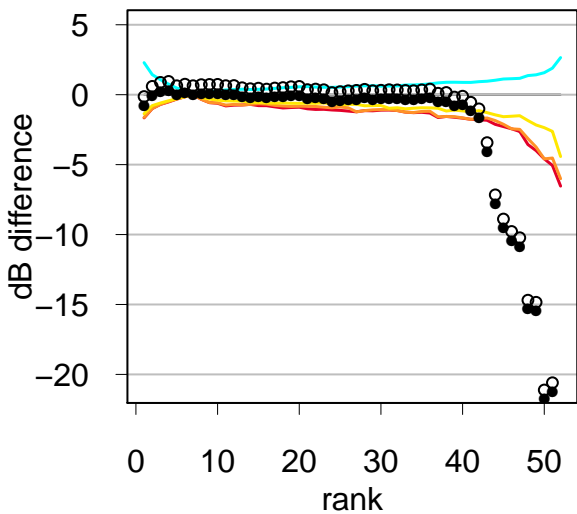

# Static Automated Perimetry. Single field analysis

Subject ID: 1034, age: 63, eye: OS (left)

Date: 09/26/2007 at 8:07:

Duration: 07:07, pause: 00:00

false positives 25.0 %

false negatives 10.0 %

fixation losses 6.7 %

MS 28.5 dB

MD -1.7 dB (p < 95 %)

PSD 7.3 dB (p < 95 %)

VFI 92.7 % (p < 0.5 %)

GH 3.7 dB

total deviation

Central 24-2  
SITA standard

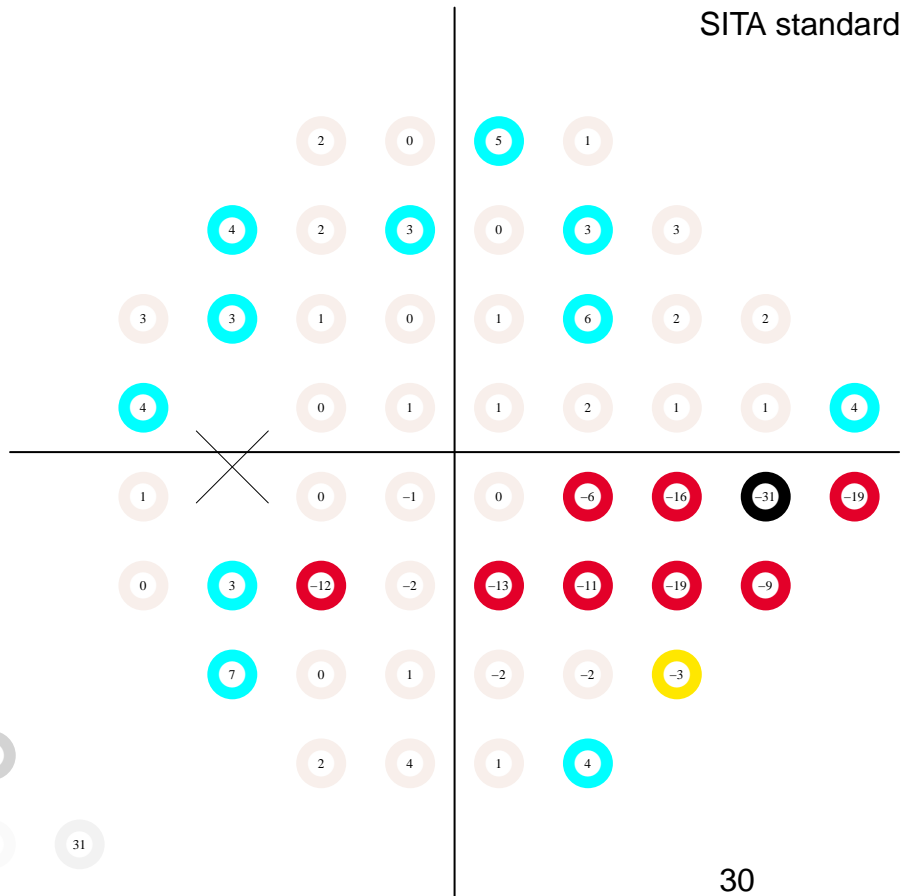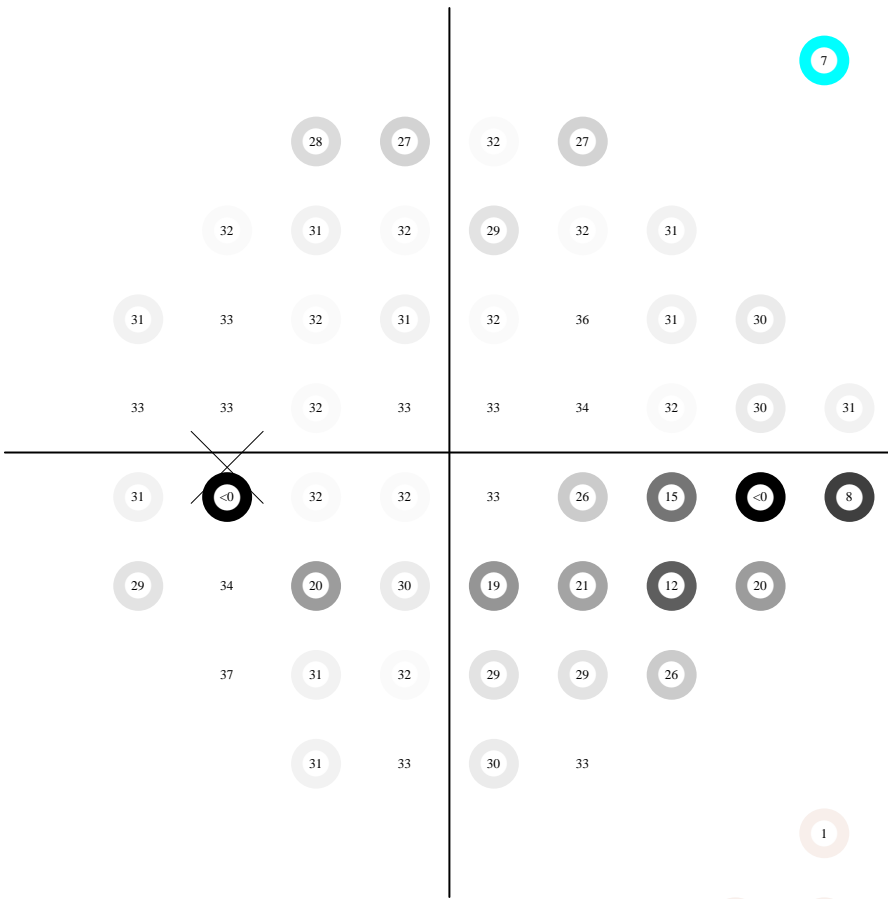

pattern deviation

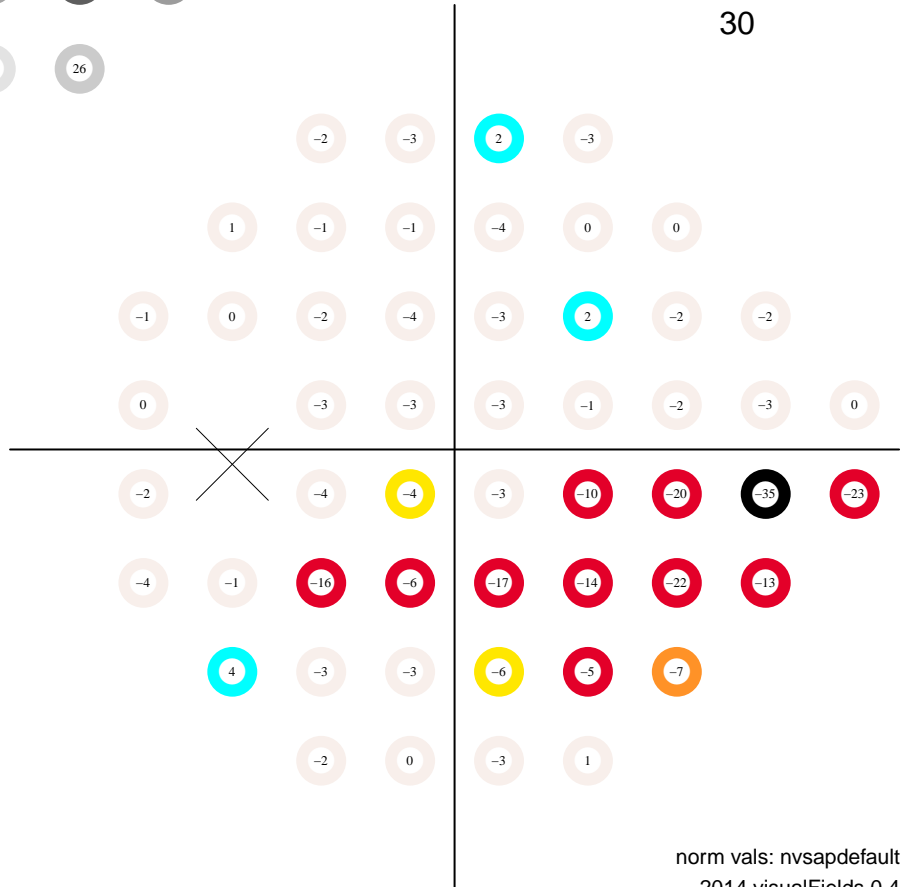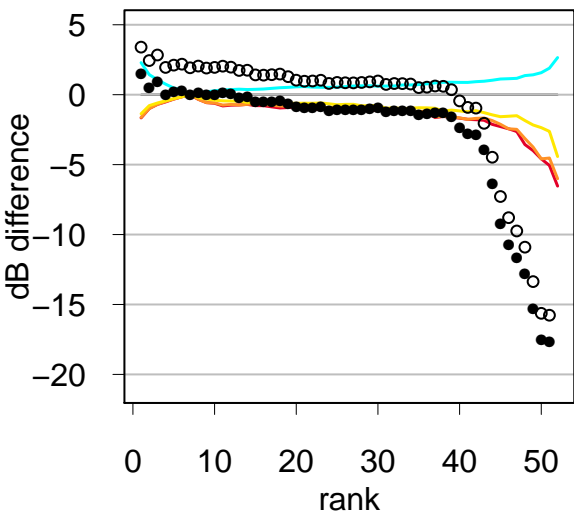

# Static Automated Perimetry. Single field analysis

Subject ID: 1034, age: 64, eye: OS (left)

Date: 09/29/2008 at 11:11

Duration: 07:10, pause: 00:00

false positives 6.0 %

false negatives 6.0 %

fixation losses 0.0 %

MS 22.3 dB

MD -7.9 dB (p < 0.5 %)

PSD 12.0 dB (p < 0.5 %)

VFI 81.0 % (p < 0.5 %)

GH 0.6 dB

total deviation

Central 24-2  
SITA standard

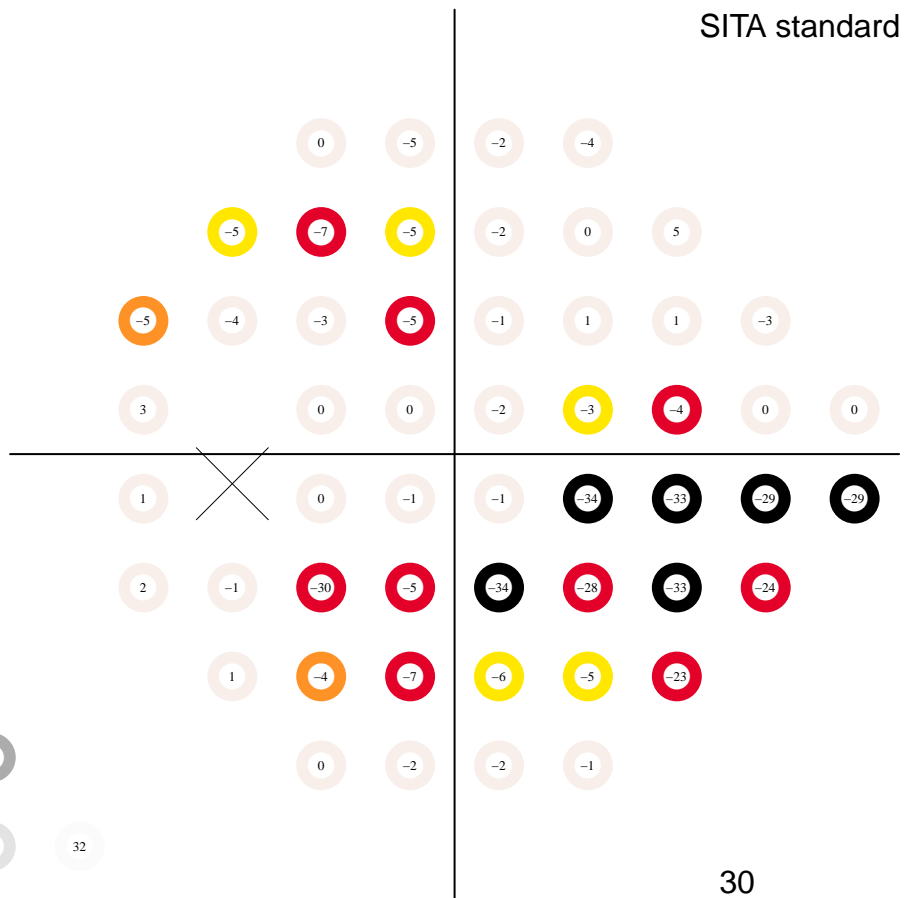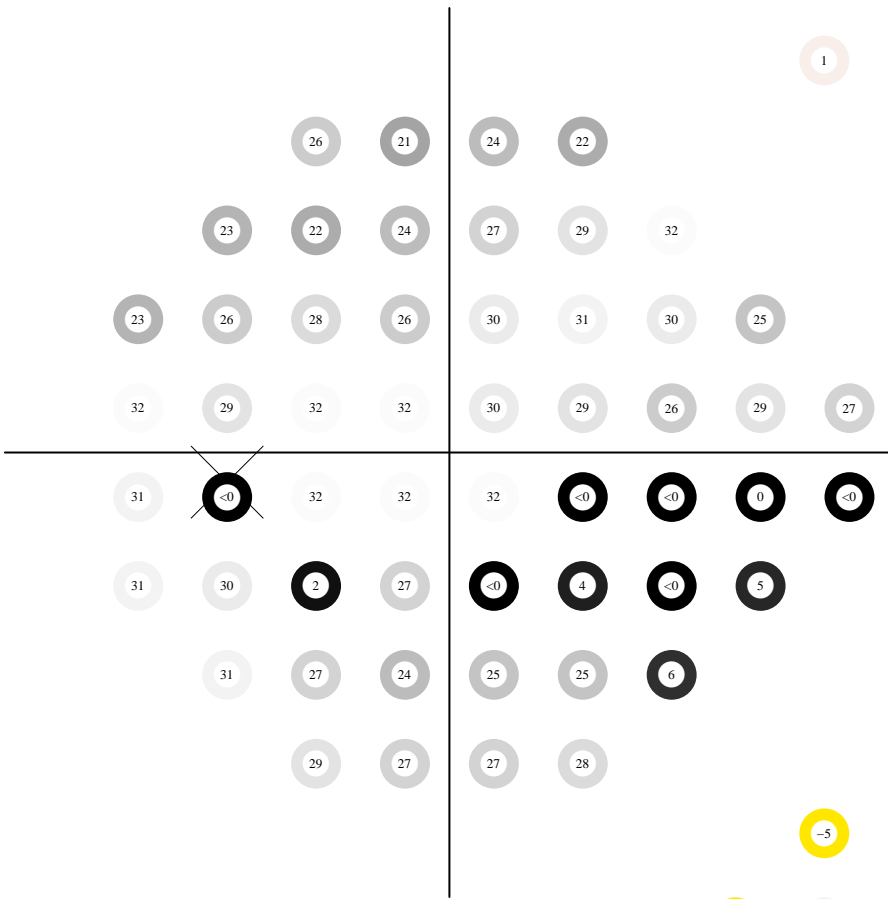

pattern deviation

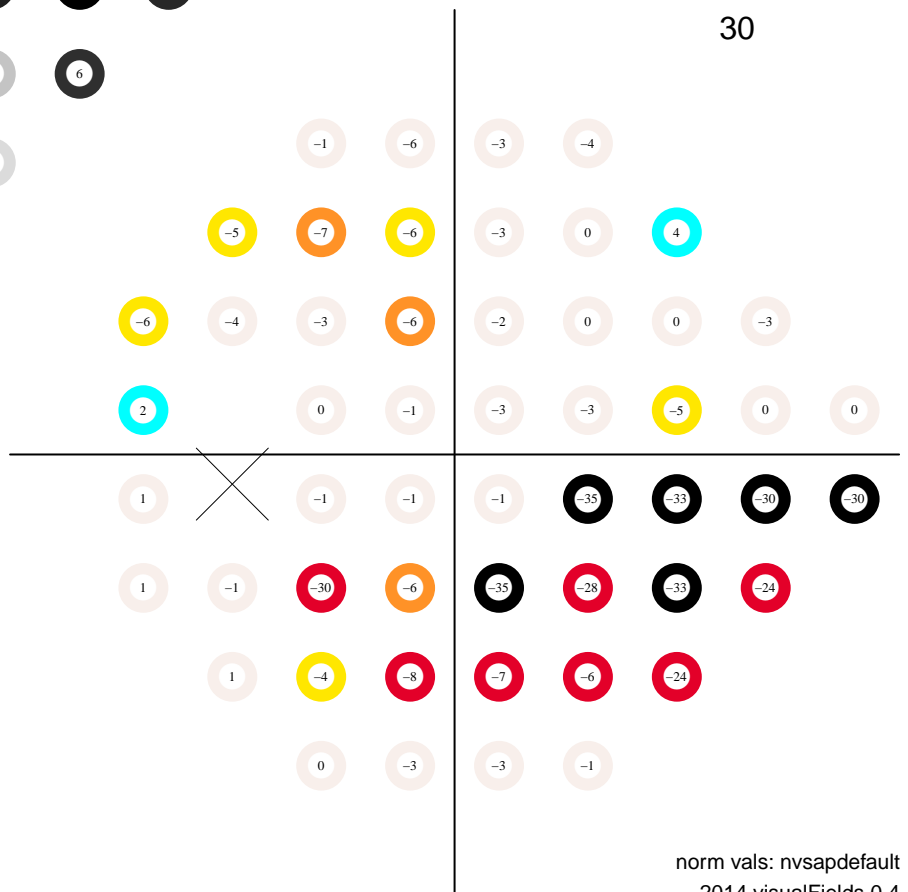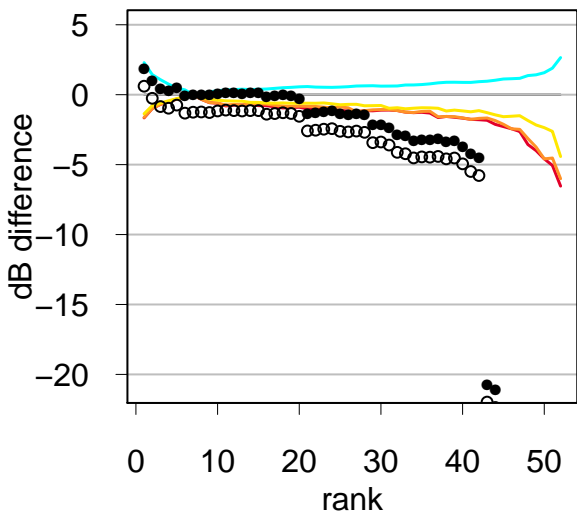



# Static Automated Perimetry. Single field analysis

Subject ID: 1034, age: 65, eye: OS (left)

Date: 05/29/2009 at 9:57:

Duration: 07:41, pause: 00:00

false positives 18.0 %

false negatives 9.0 %

fixation losses 20.0 %

MS 25.8 dB

MD -4.2 dB (p < 0.5 %)

PSD 9.4 dB (p < 0.5 %)

VFI 89.1 % (p < 0.5 %)

GH 1.9 dB

total deviation

Central 24-2  
SITA standard

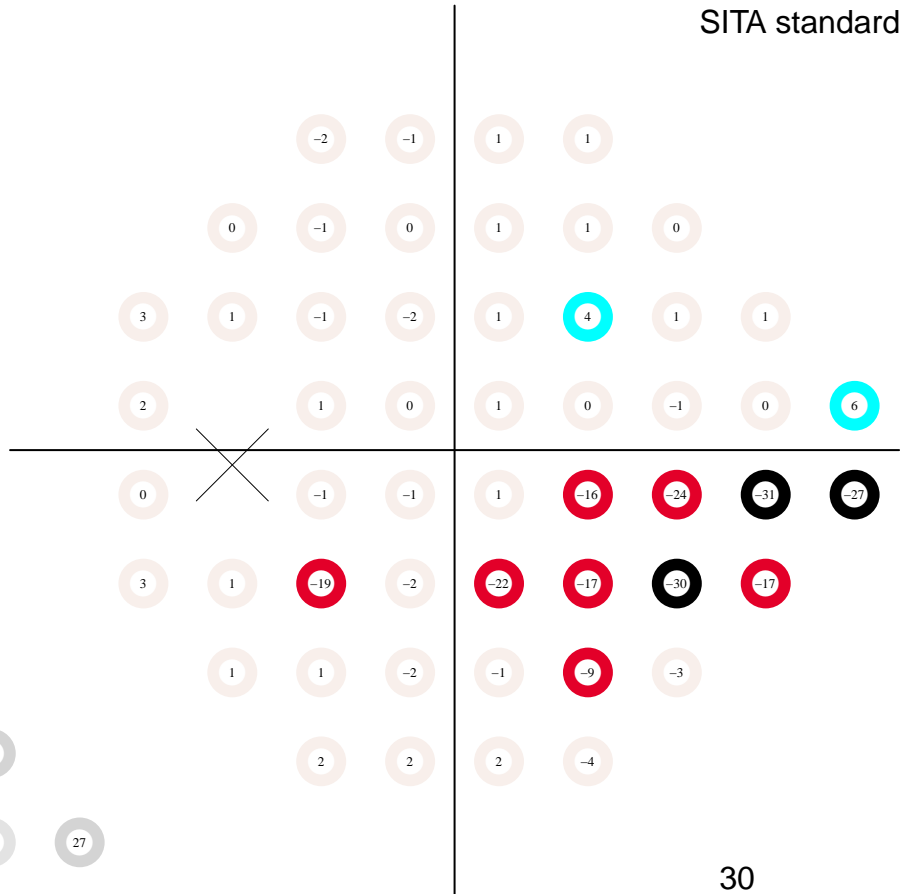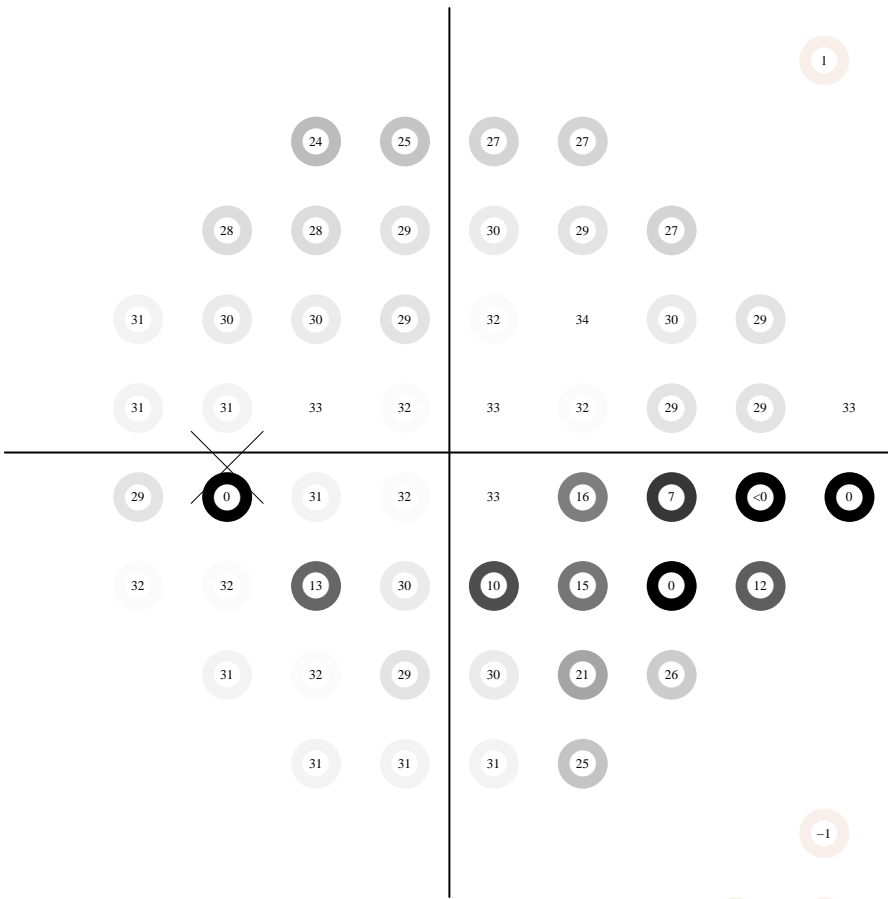

pattern deviation

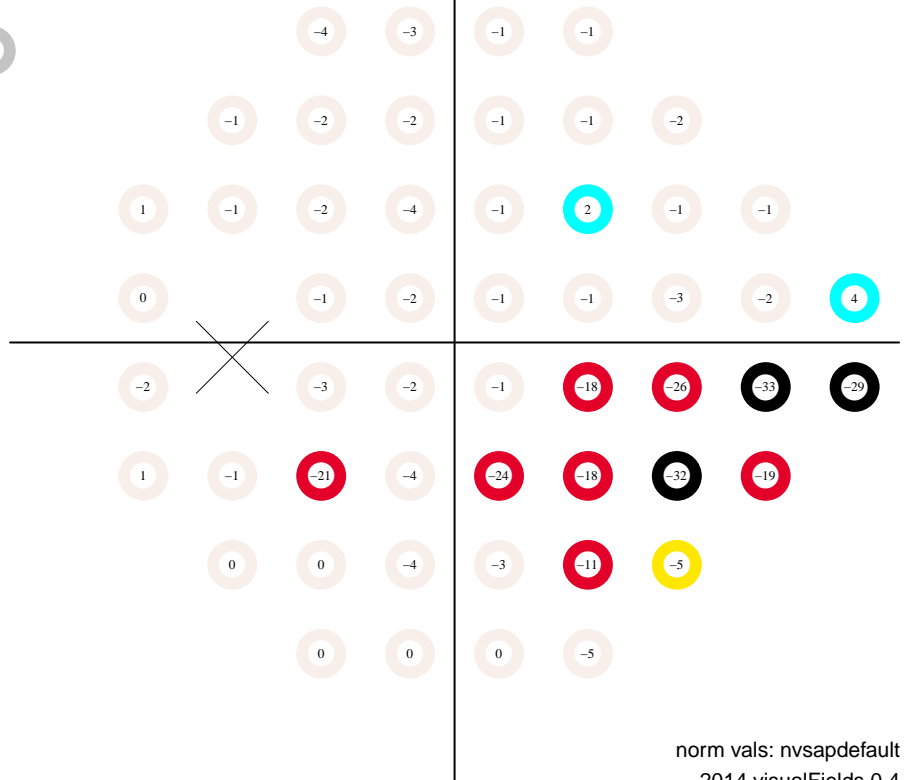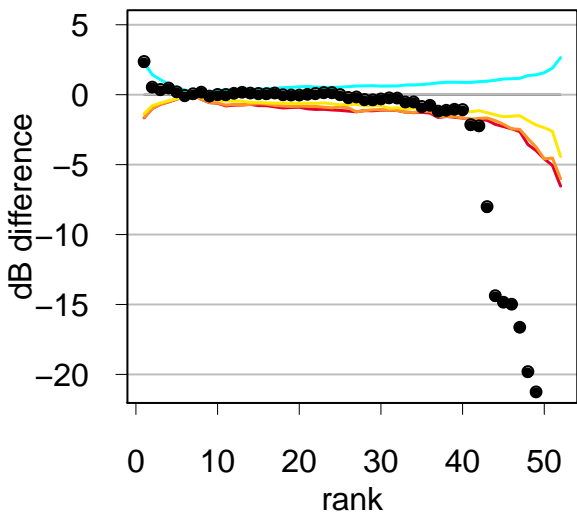

# Static Automated Perimetry. Single field analysis

Subject ID: 1034, age: 65, eye: OS (left)

Date: 07/08/2009 at 16:32

Duration: 06:50, pause: 00:00

false positives 22.0 %

false negatives 7.0 %

fixation losses 29.4 %

MS 25.9 dB

MD -4.2 dB (p < 0.5 %)

PSD 9.9 dB (p < 0.5 %)

VFI 88.8 % (p < 0.5 %)

GH 1.9 dB

total deviation

Central 24-2  
SITA standard

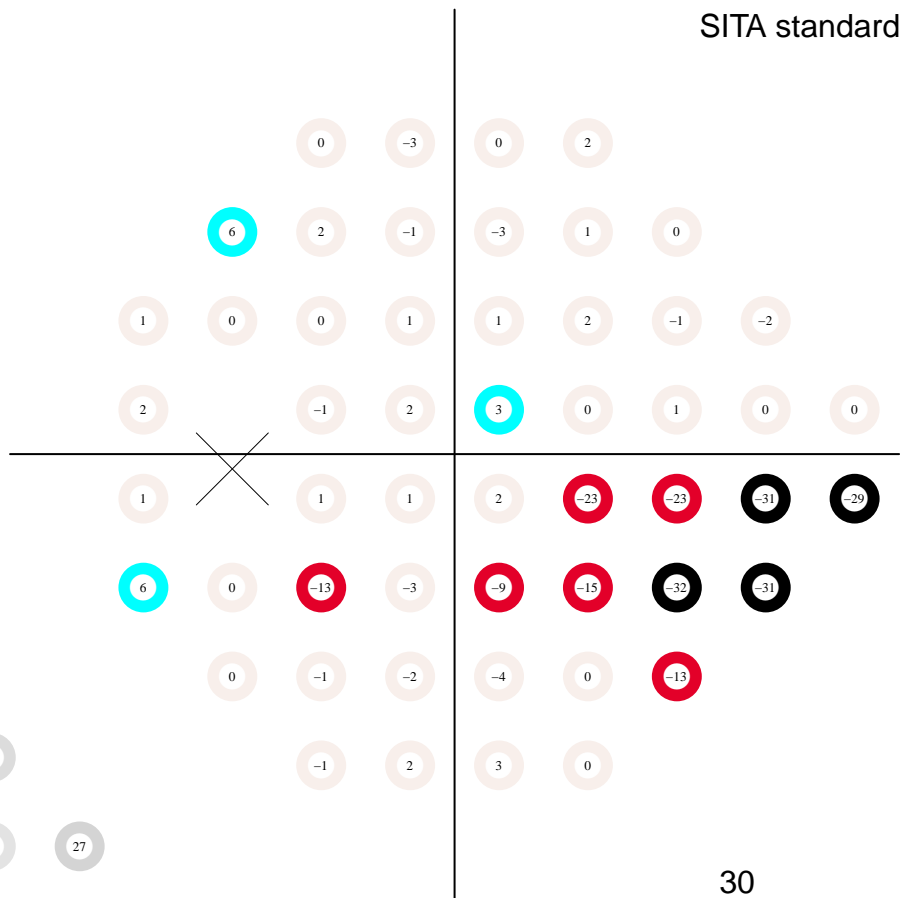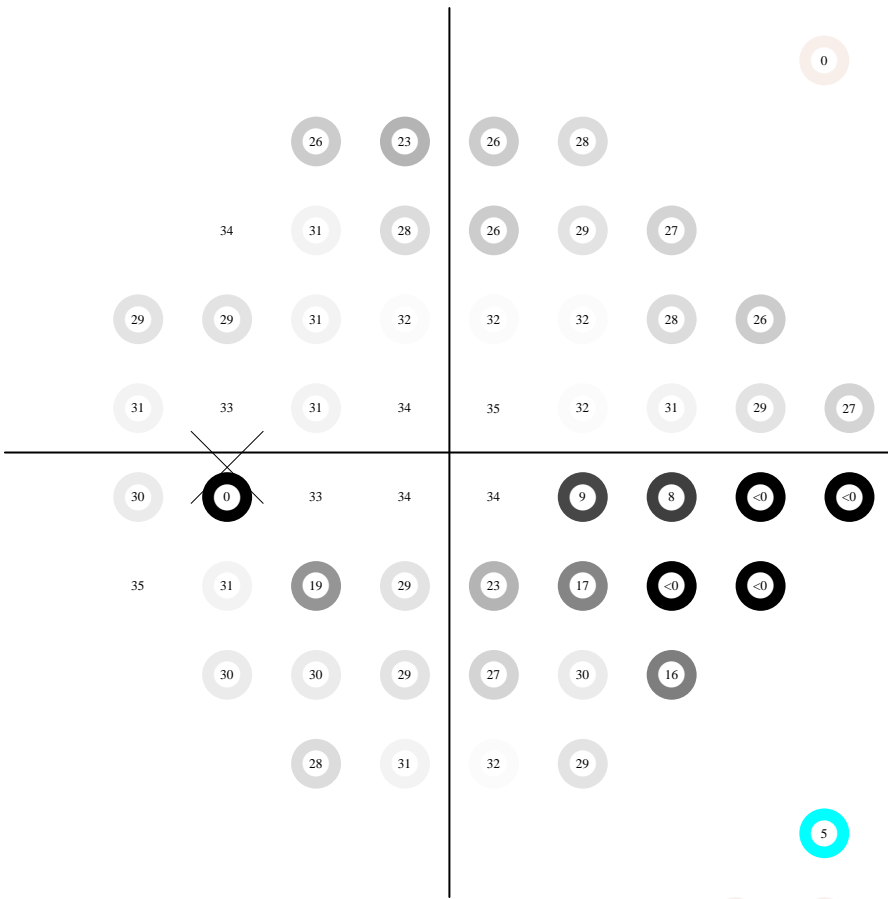

pattern deviation

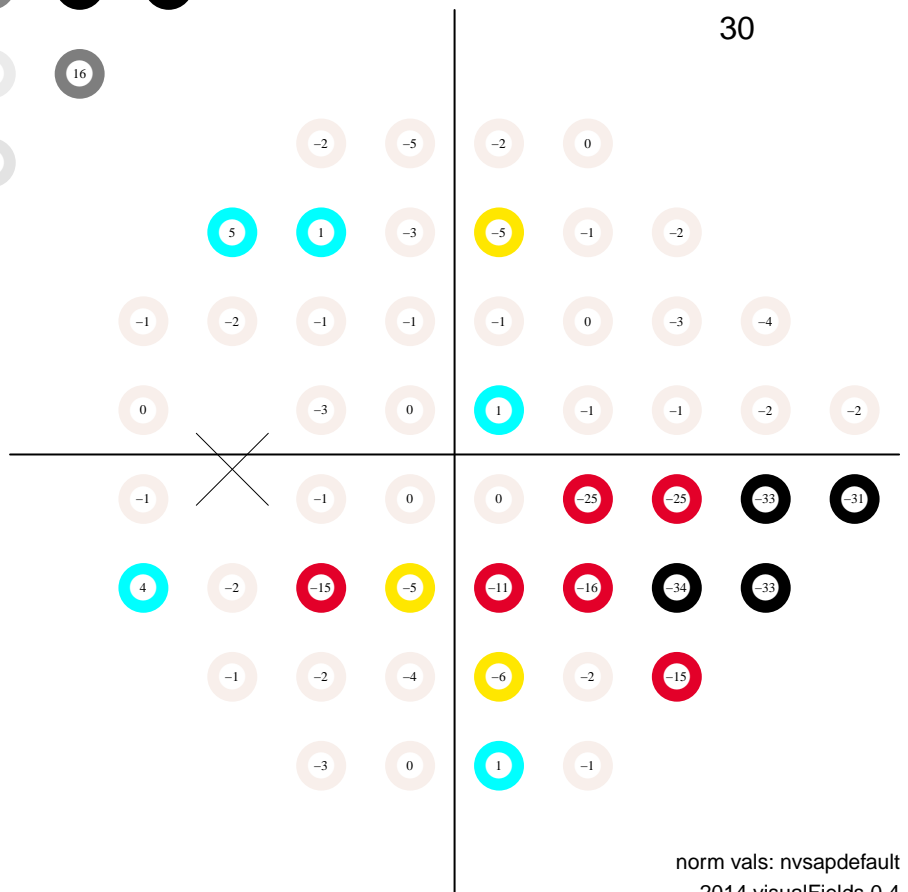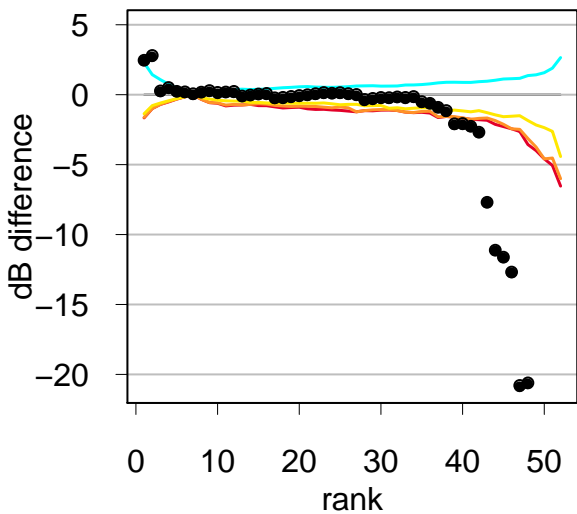

# Static Automated Perimetry. Single field analysis

Subject ID: 1034, age: 65, eye: OS (left)

Date: 07/10/2009 at 16:32

Duration: 06:30, pause: 00:00

false positives 11.0 %

false negatives 9.0 %

fixation losses 47.1 %

MS 26.0 dB

MD -4.1 dB (p < 0.5 %)

PSD 9.9 dB (p < 0.5 %)

VFI 87.7 % (p < 0.5 %)

GH 2.9 dB

total deviation

Central 24-2  
SITA standard

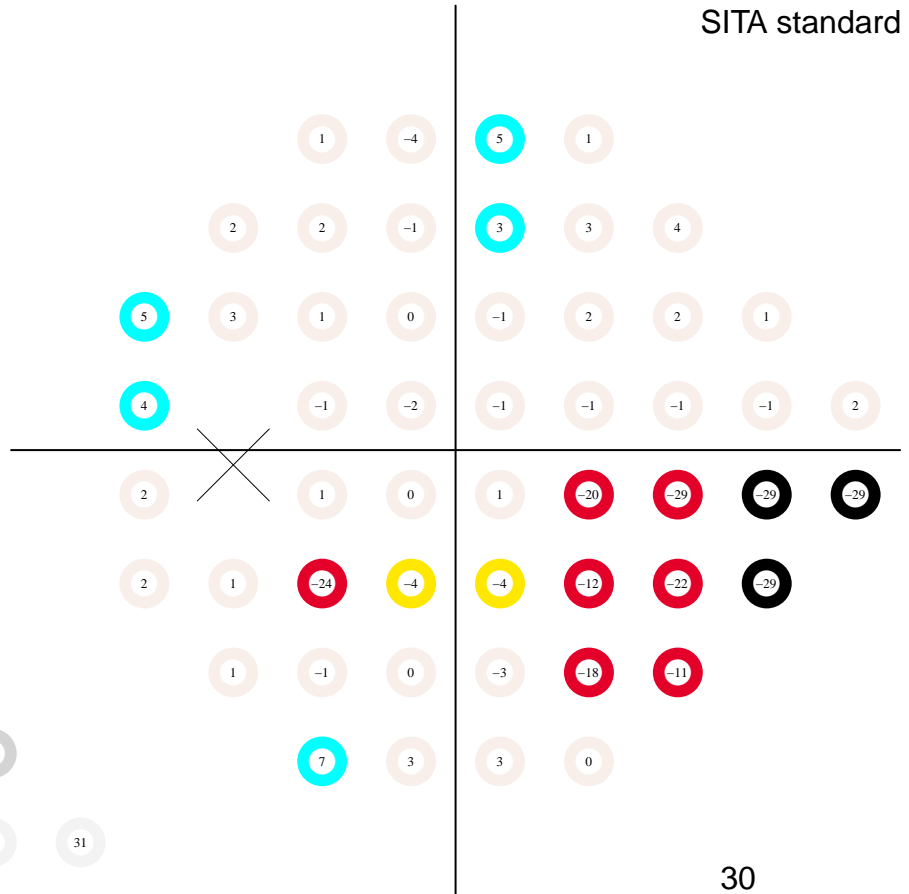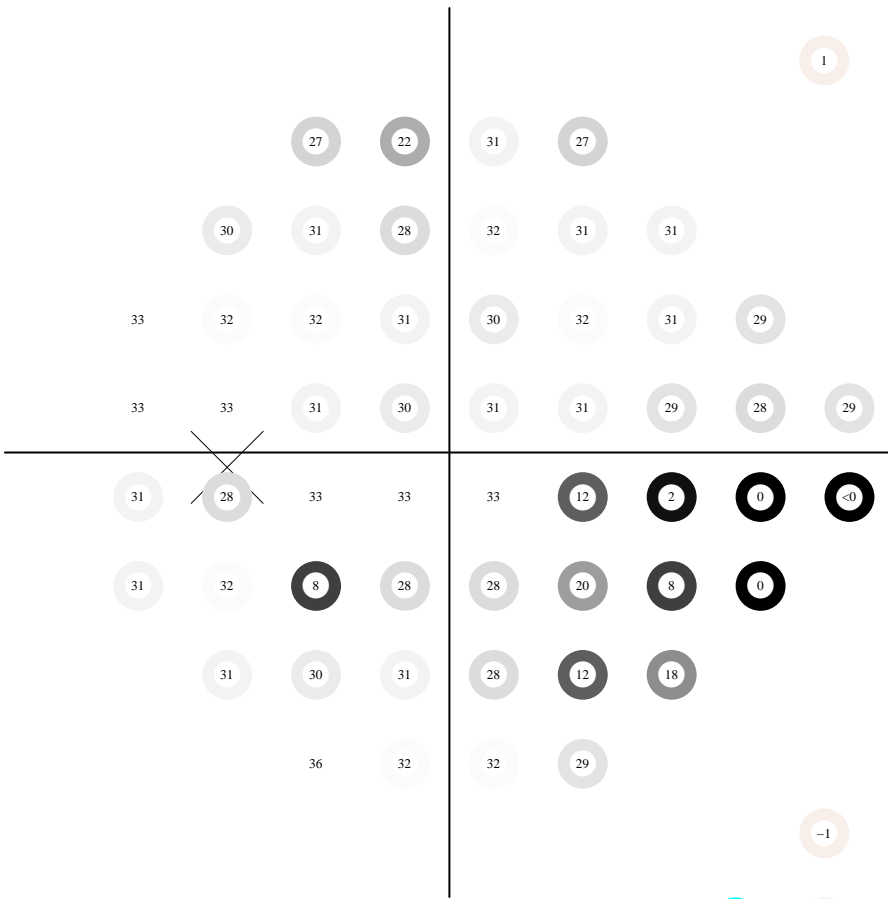

pattern deviation

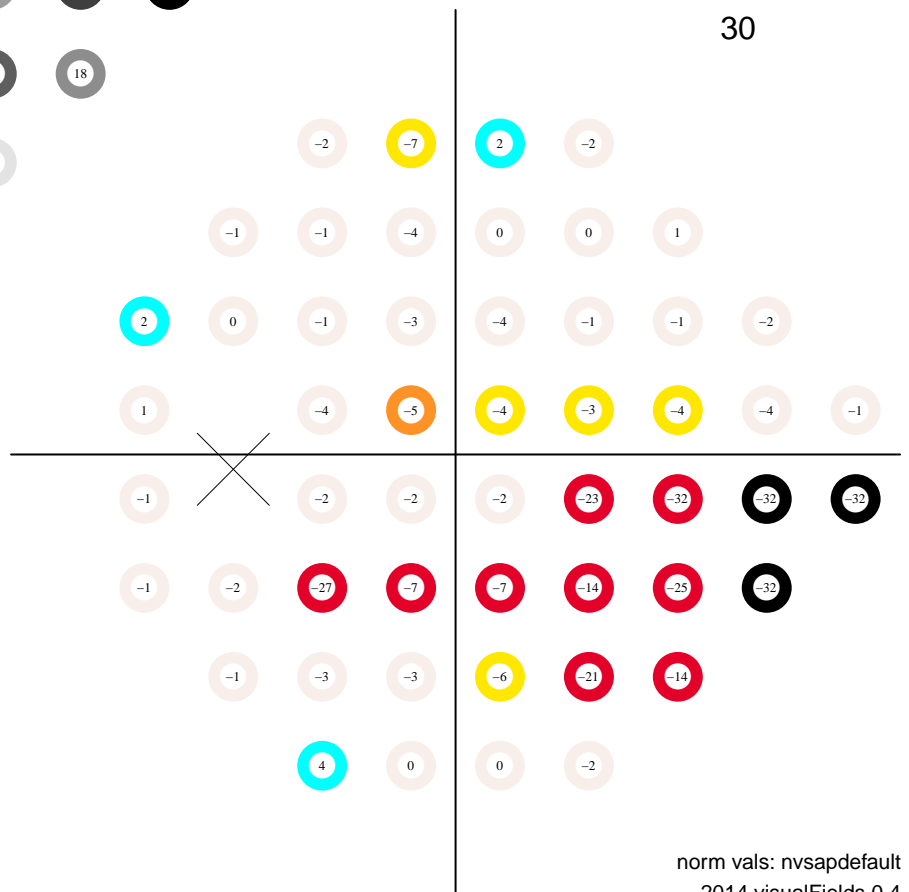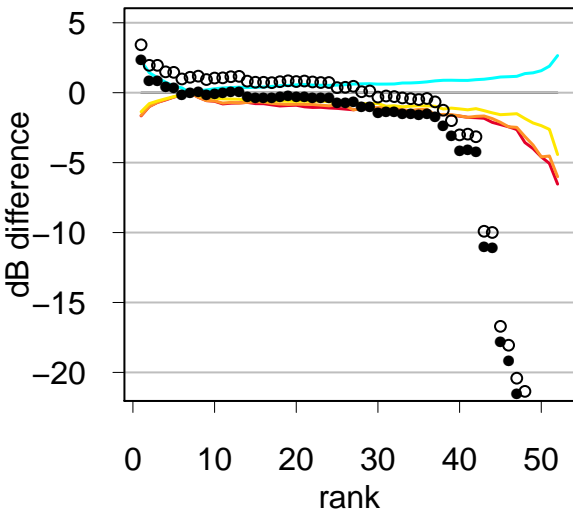

# Static Automated Perimetry. Single field analysis

Subject ID: 1034, age: 65, eye: OS (left)

Date: 09/04/2009 at 7:35:

Duration: 06:01, pause: 00:00

false positives 4.0 %

false negatives 20.0 %

fixation losses 0.0 %

MS 23.8 dB

MD -6.3 dB (p < 0.5 %)

PSD 12.1 dB (p < 0.5 %)

VFI 82.7 % (p < 0.5 %)

GH 2.5 dB

total deviation

Central 24-2  
SITA standard

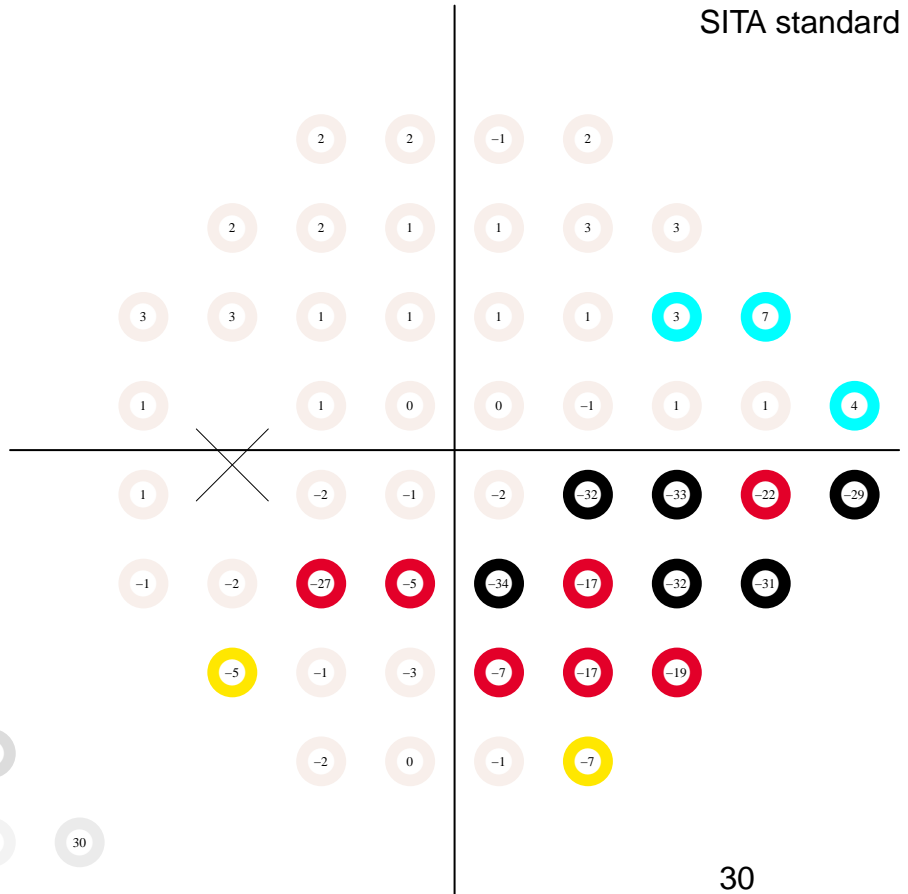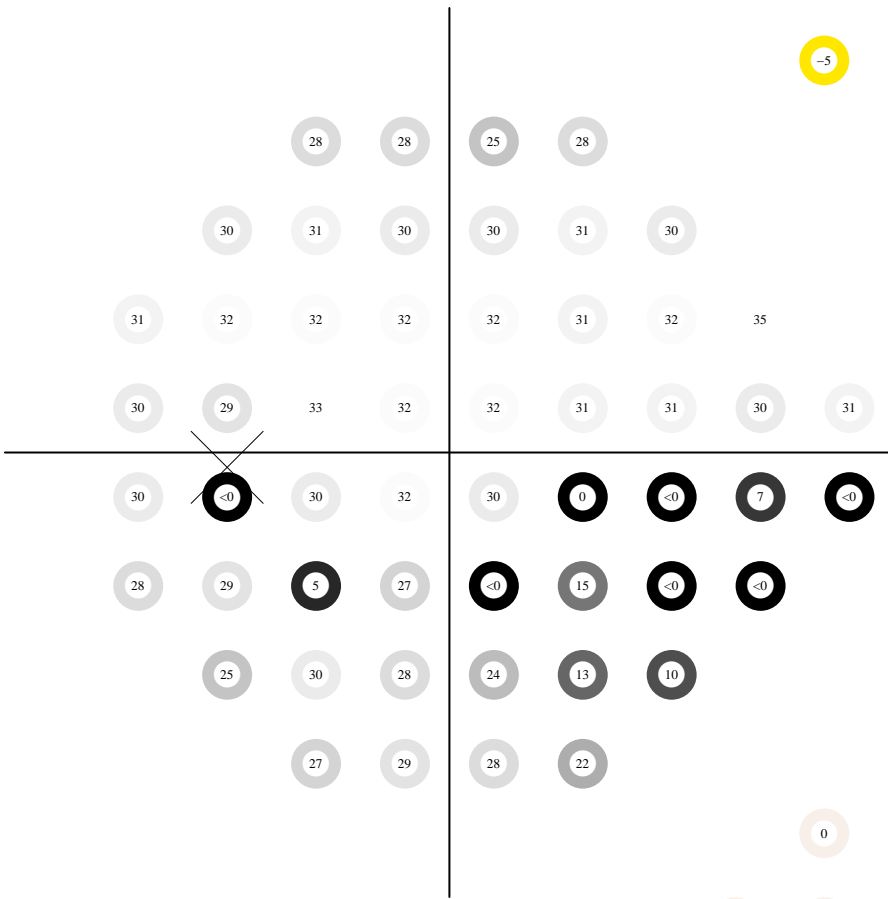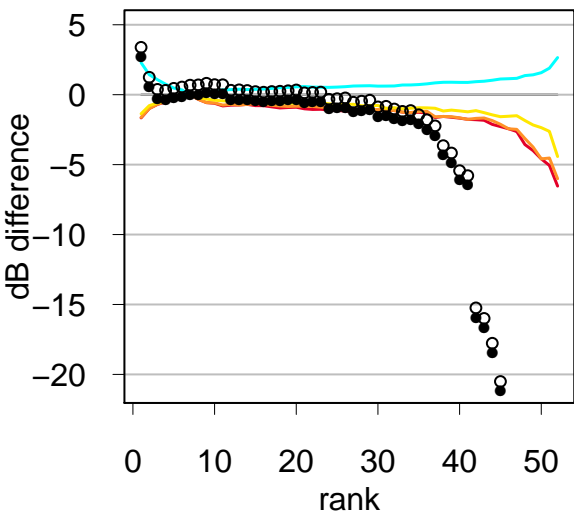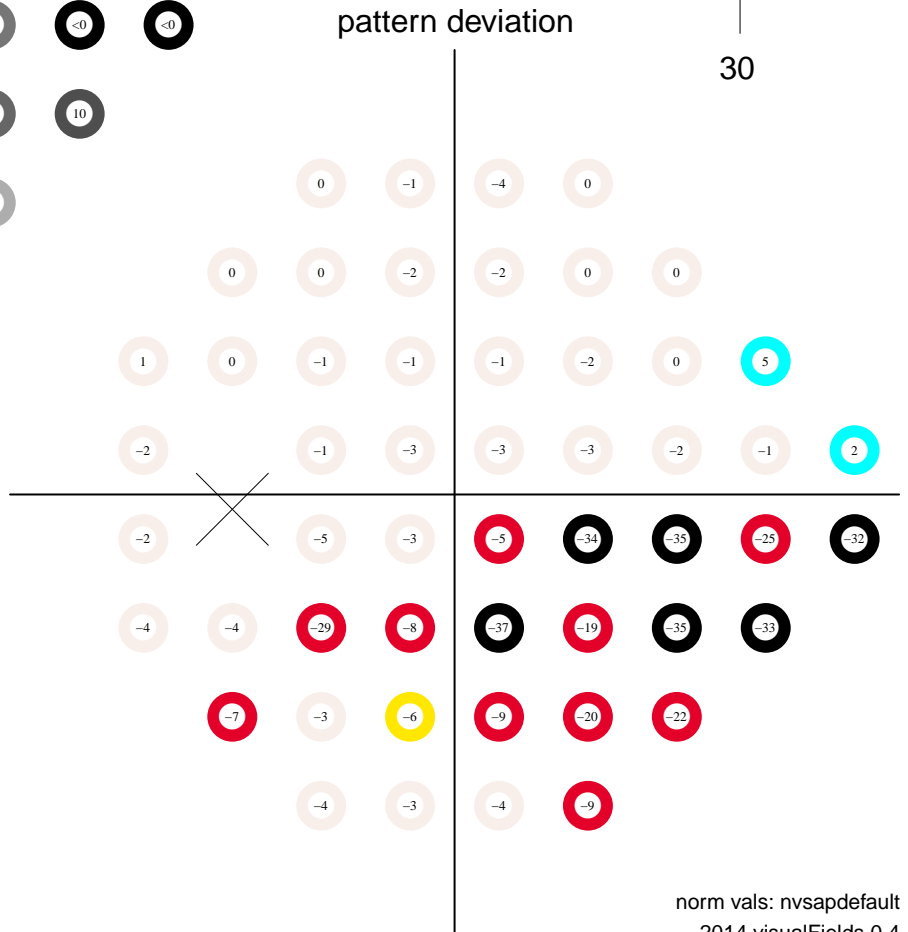

# Static Automated Perimetry. Single field analysis

Subject ID: 1034, age: 66, eye: OS (left)

Date: 09/15/2010 at 8:39:

Duration: 07:50, pause: 00:00

false positives 35.0 %

false negatives 13.0 %

fixation losses 43.8 %

MS 28.7 dB

MD -1.3 dB (p < 95 %)

PSD 8.7 dB (p < 95 %)

VFI 91.2 % (p < 0.5 %)

GH 4.6 dB

total deviation

Central 24-2  
SITA standard

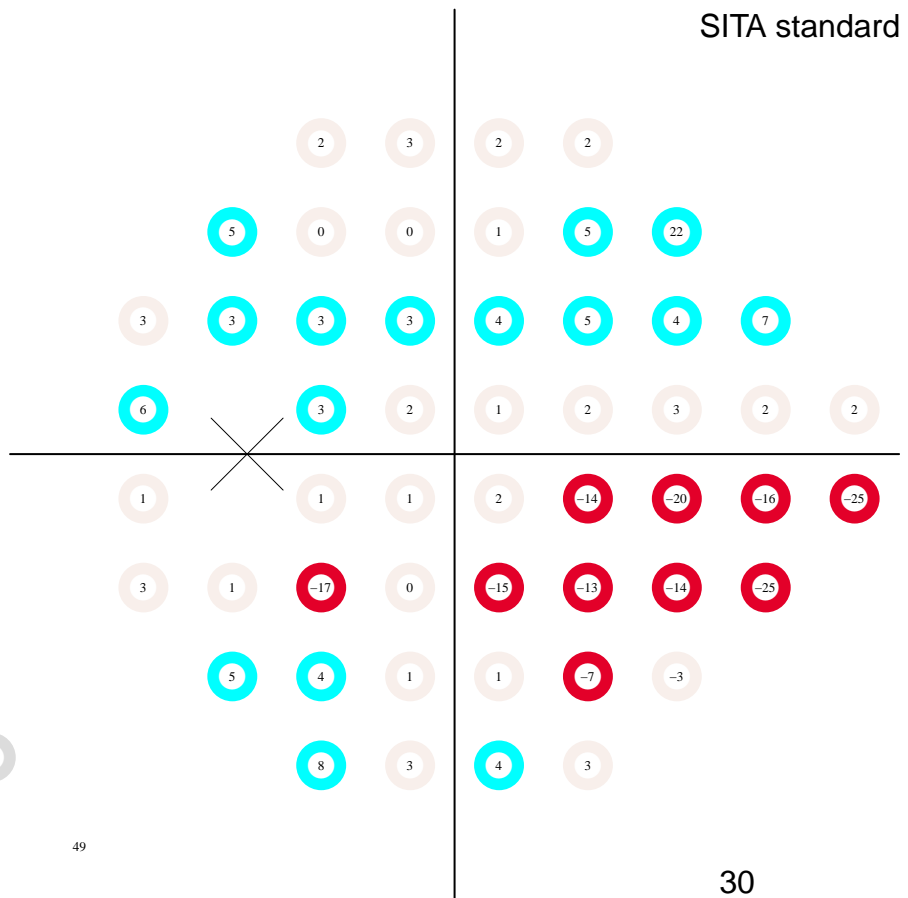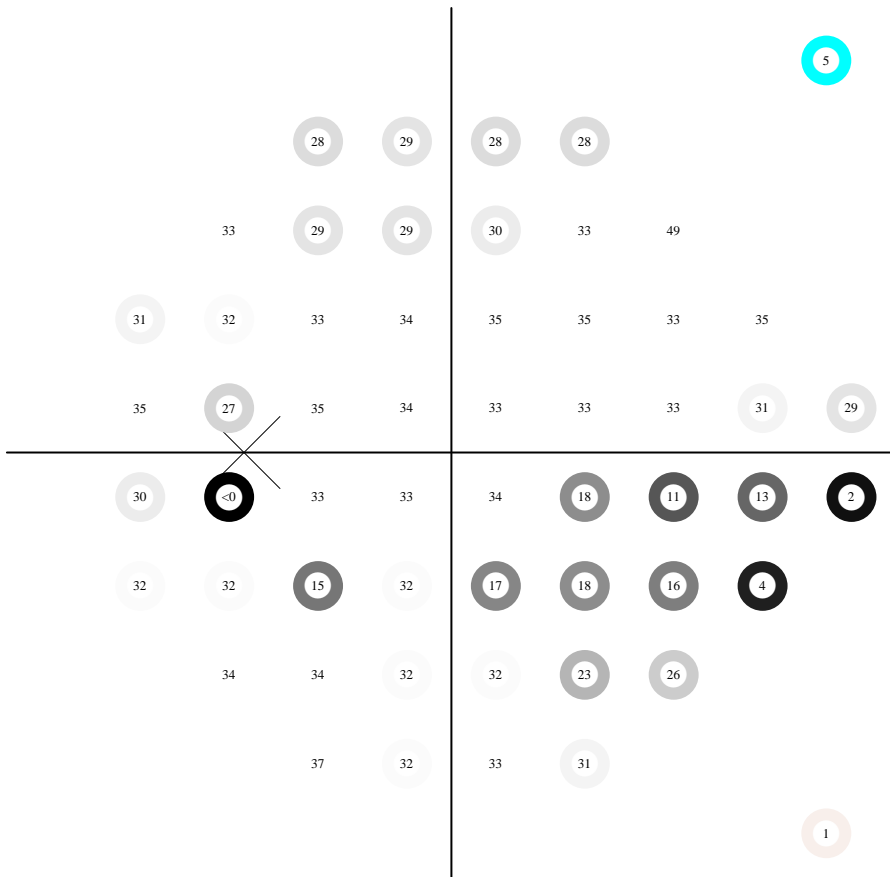

pattern deviation

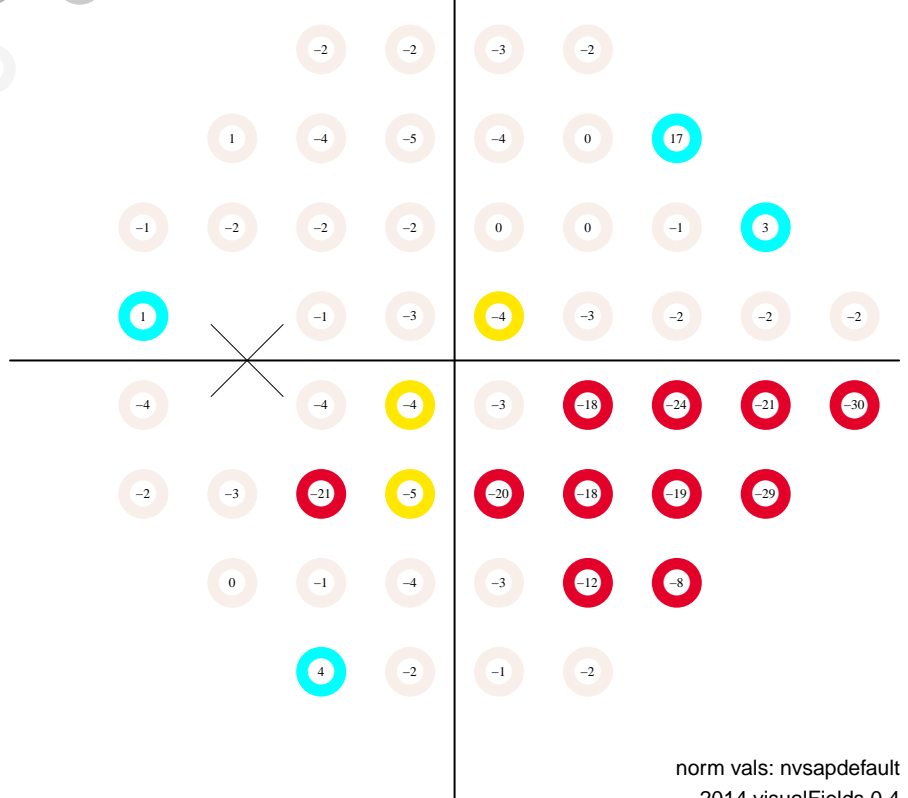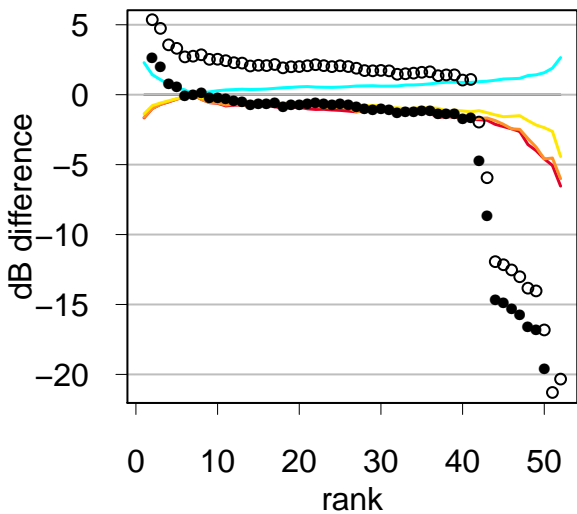

# Static Automated Perimetry. Single field analysis

Subject ID: 1034, age: 67, eye: OS (left)

Date: 09/02/2011 at 8:04:

Duration: 07:05, pause: 00:00

false positives 9.0 %

false negatives 7.0 %

fixation losses 41.2 %

MS 25.9 dB

MD -4.1 dB (p < 0.5 %)

PSD 9.2 dB (p < 0.5 %)

VFI 90.7 % (p < 0.5 %)

GH 2.0 dB

total deviation

Central 24-2  
SITA standard

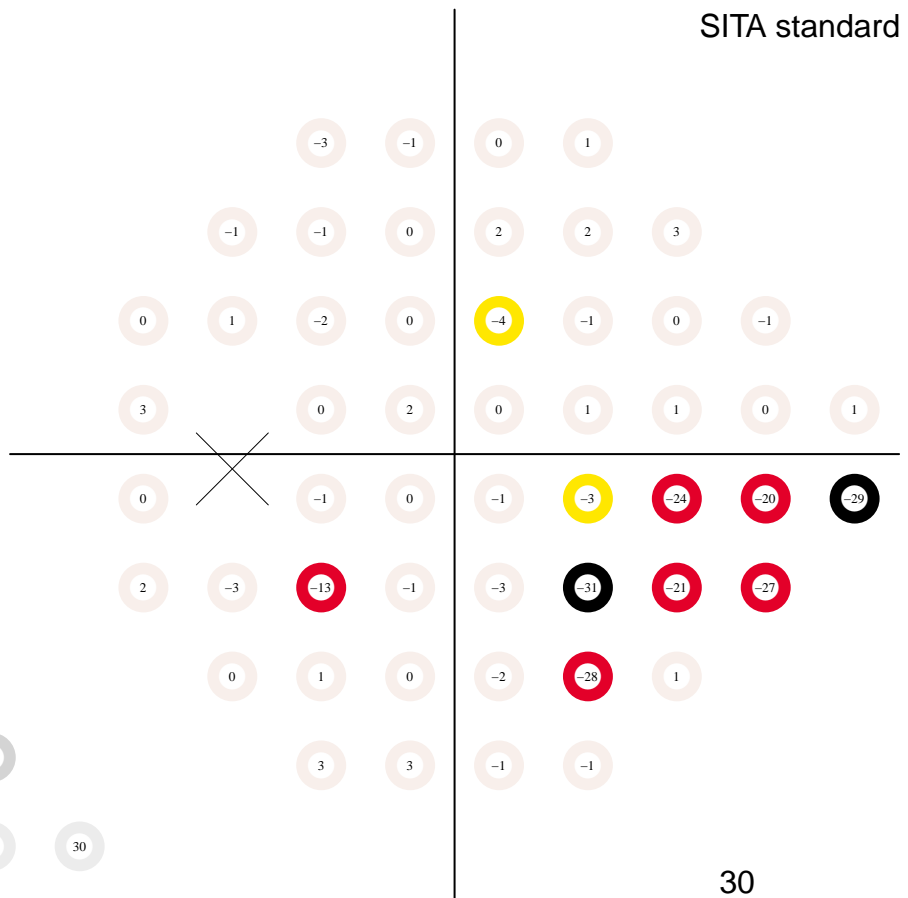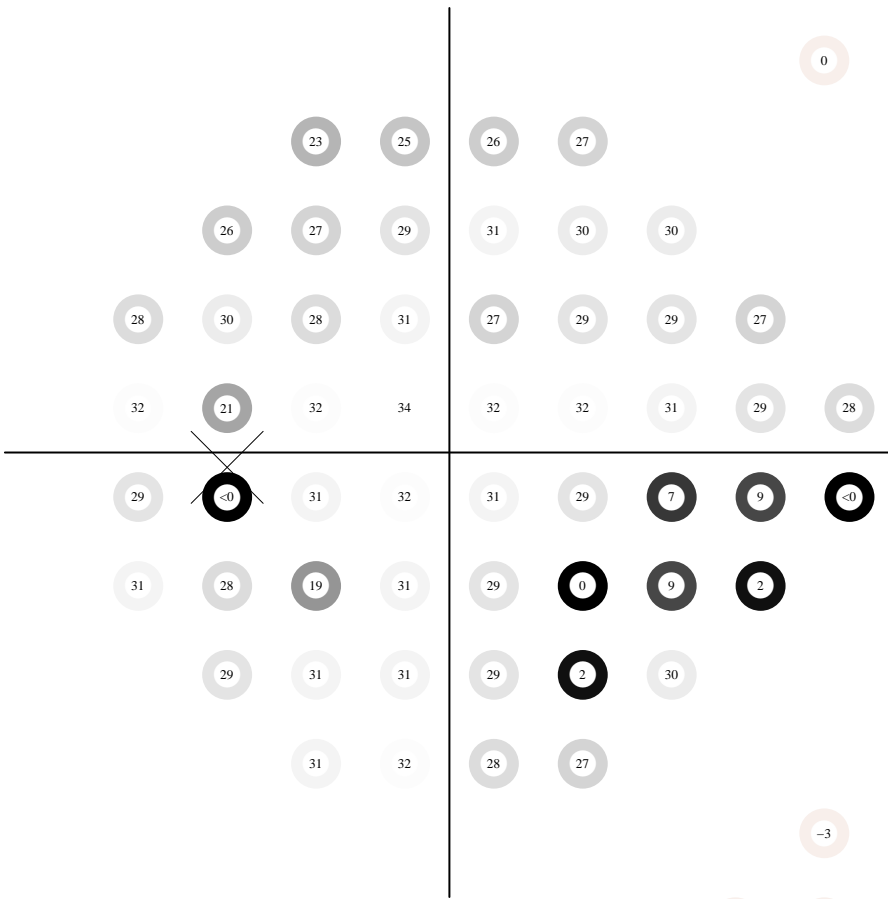

pattern deviation

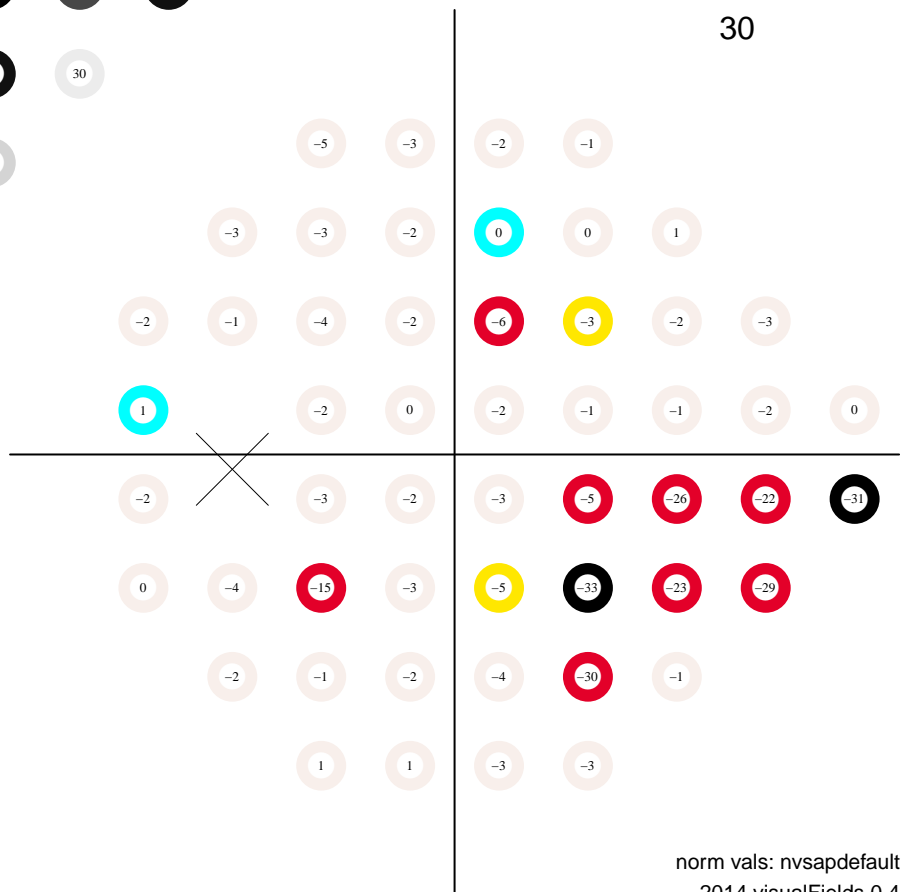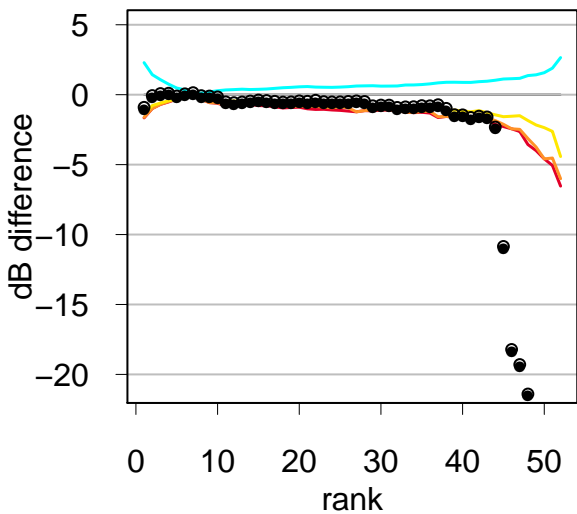

# Static Automated Perimetry. Single field analysis

Subject ID: 1034, age: 67, eye: OS (left)

Date: 11/17/2011 at 11:12

Duration: 07:54, pause: 00:00

false positives 19.0 %

false negatives 13.0 %

fixation losses 12.5 %

MS 25.0 dB

MD -5.0 dB (p < 0.5 %)

PSD 10.3 dB (p < 0.5 %)

VFI 87.0 % (p < 0.5 %)

GH 1.5 dB

total deviation

Central 24-2  
SITA standard

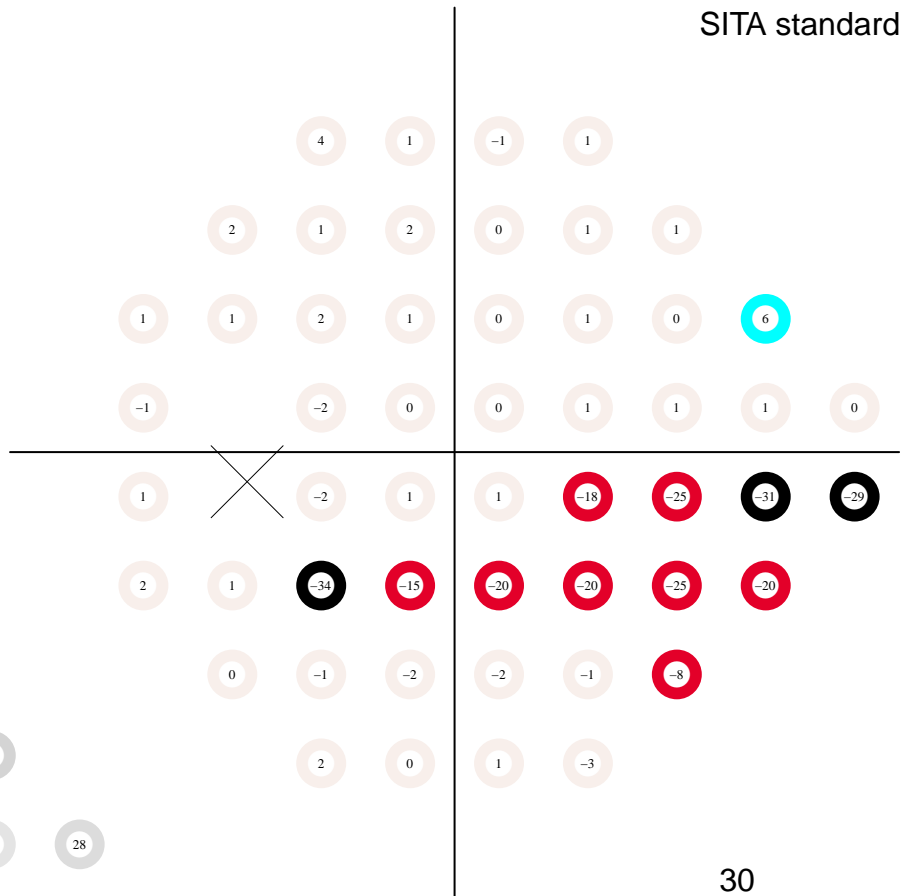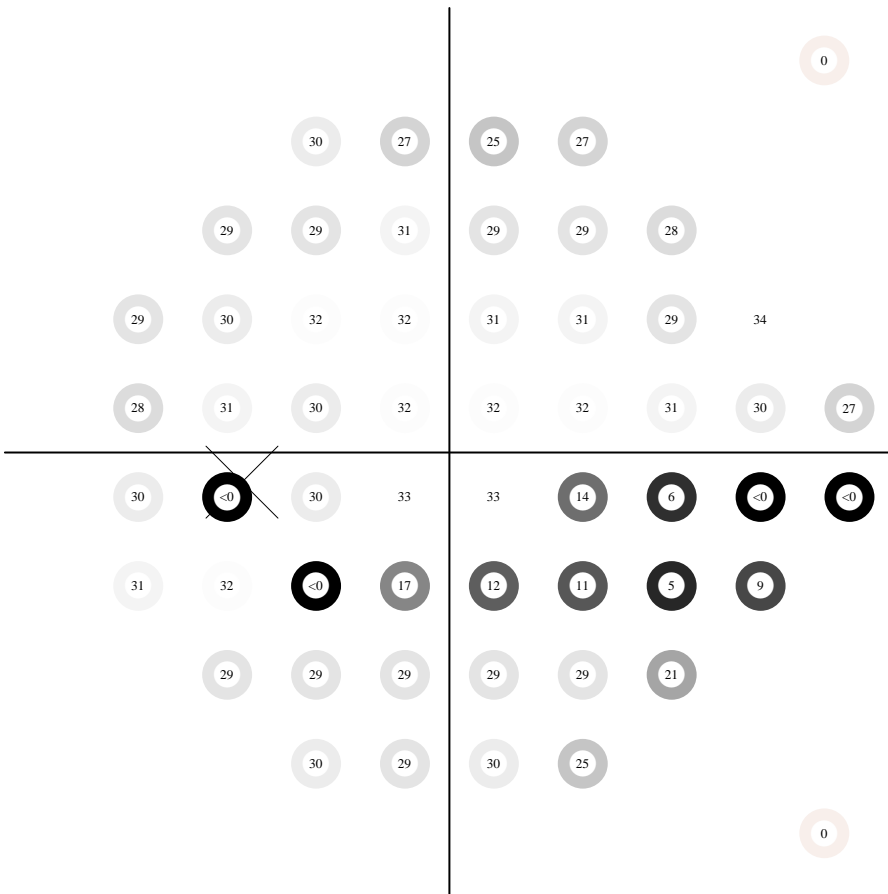

pattern deviation

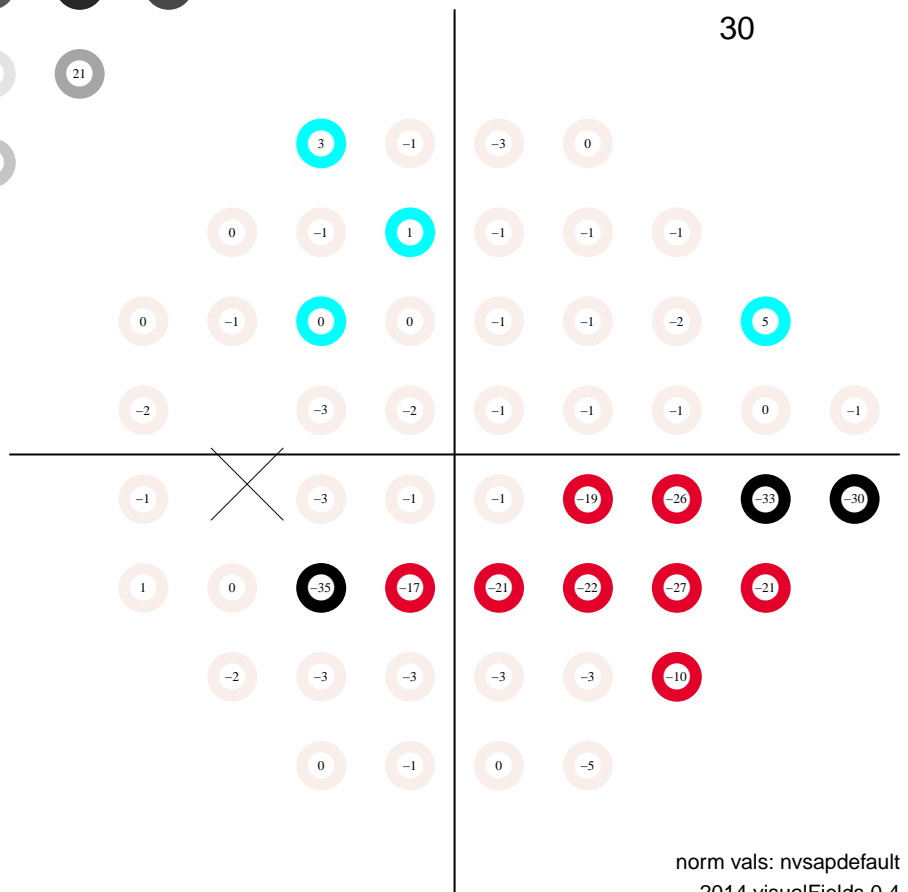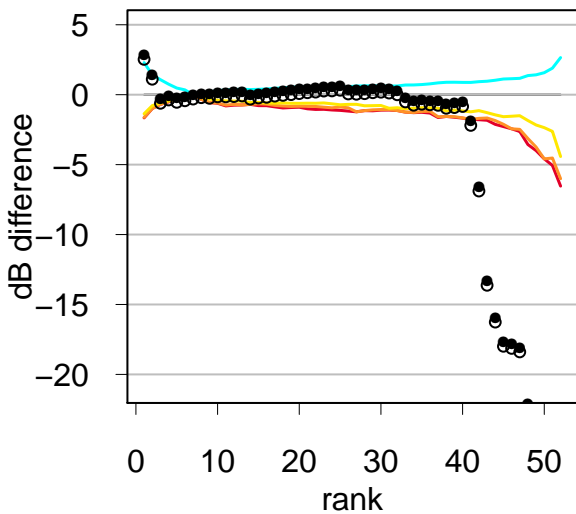

# Static Automated Perimetry. Single field analysis

Subject ID: 1034, age: 67, eye: OS (left)

Date: 02/08/2012 at 11:17

Duration: 06:21, pause: 00:00

false positives 11.0 %

false negatives 1.0 %

fixation losses 37.5 %

MS 25.7 dB

MD -4.3 dB (p < 0.5 %)

PSD 10.3 dB (p < 0.5 %)

VFI 86.0 % (p < 0.5 %)

GH 3.7 dB

total deviation

Central 24-2  
SITA standard

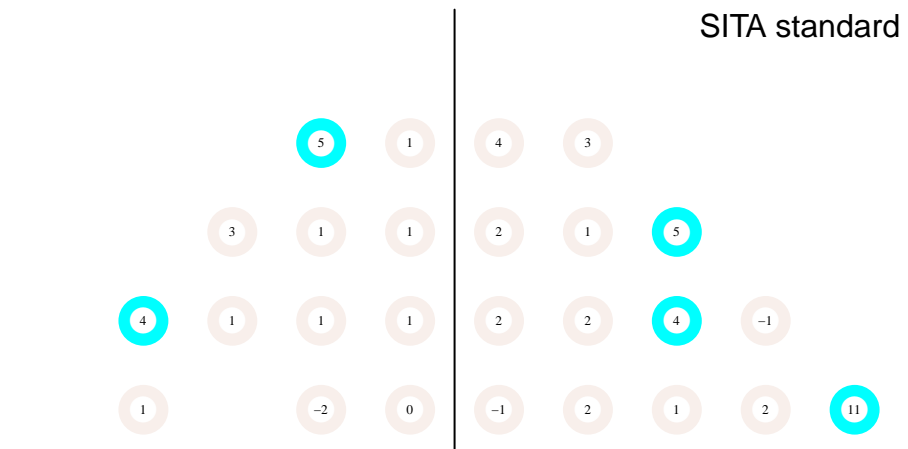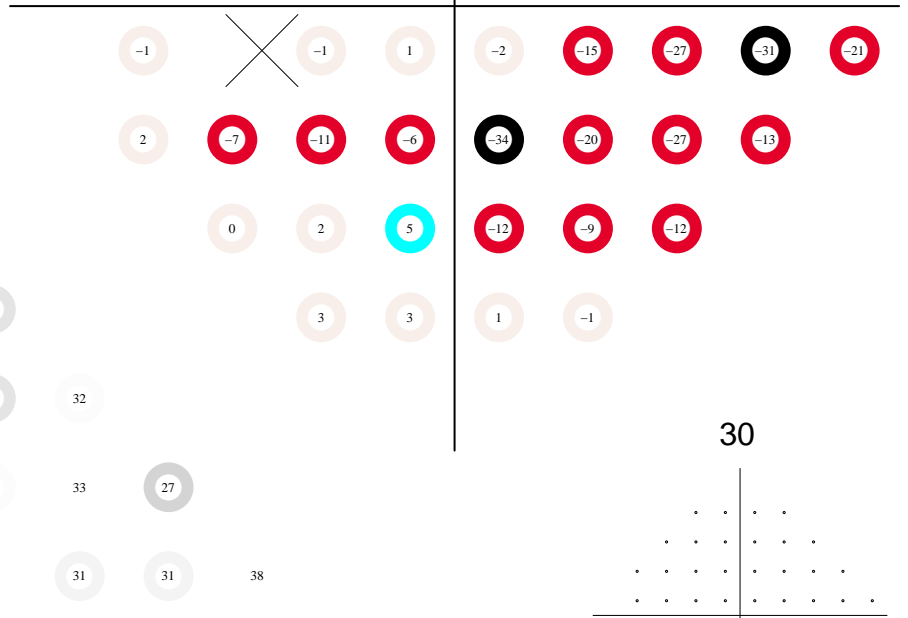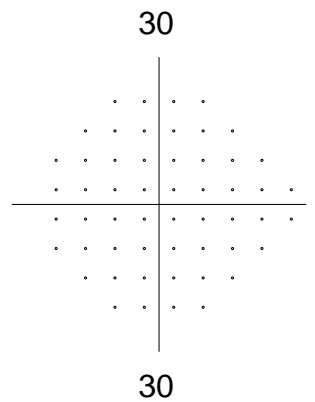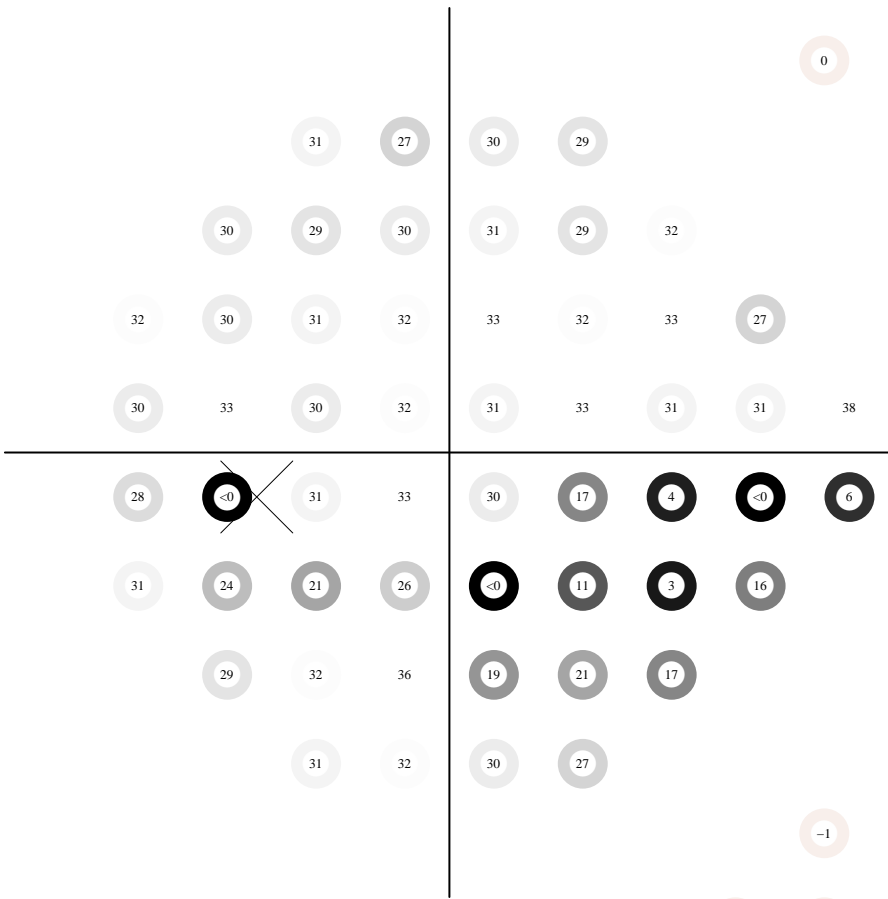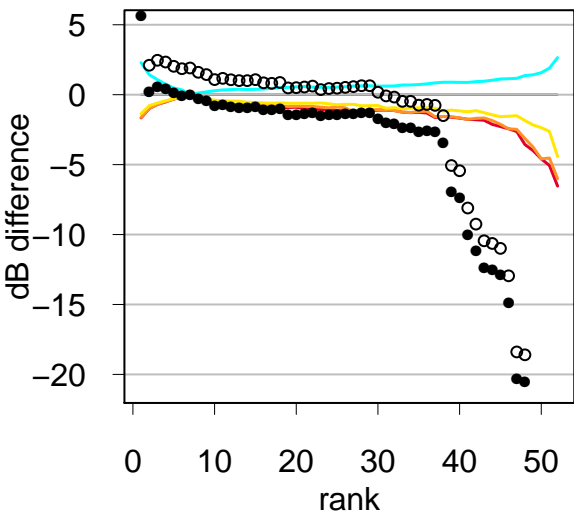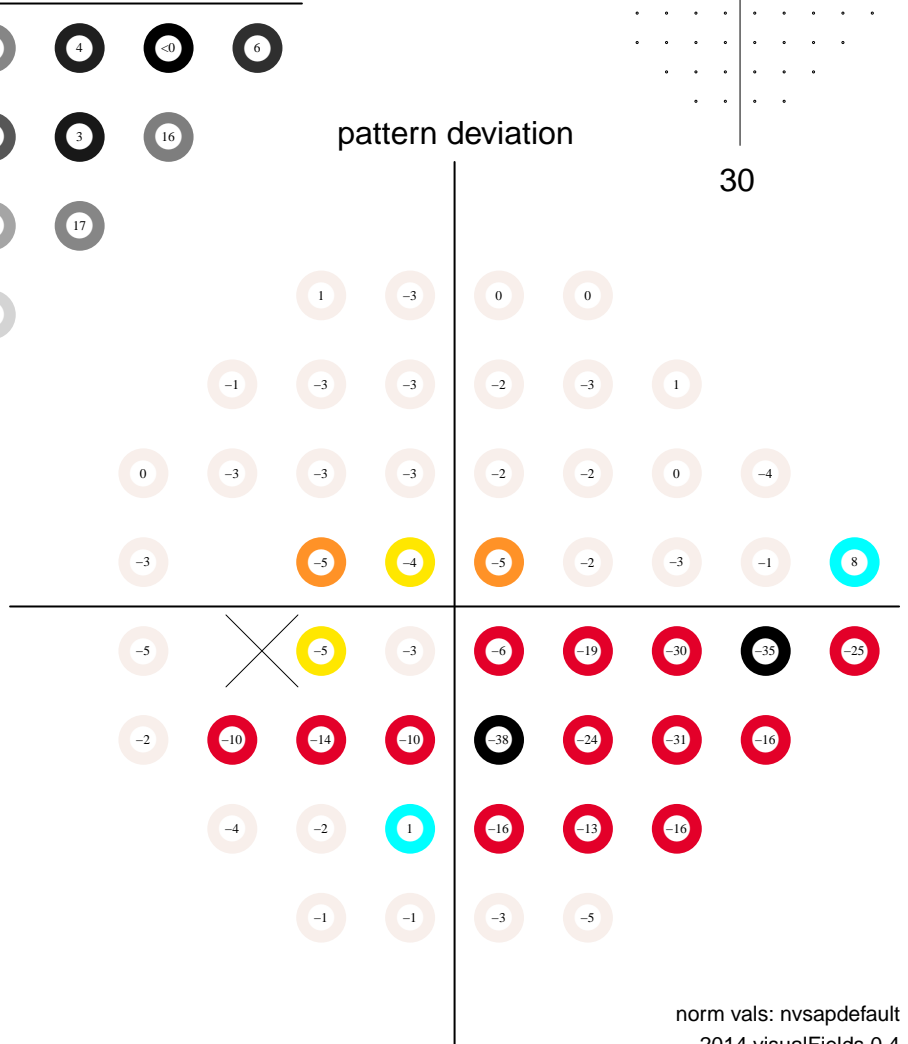



# Static Automated Perimetry. Single field analysis

Subject ID: 1034, age: 67, eye: OS (left)

Date: 03/08/2012 at 9:52:

Duration: 06:23, pause: 00:00

false positives 7.0 %

false negatives 0.0 %

fixation losses 31.2 %

MS 24.9 dB

MD -5.0 dB (p < 0.5 %)

PSD 10.9 dB (p < 0.5 %)

VFI 85.8 % (p < 0.5 %)

GH 2.6 dB

total deviation

Central 24-2  
SITA standard

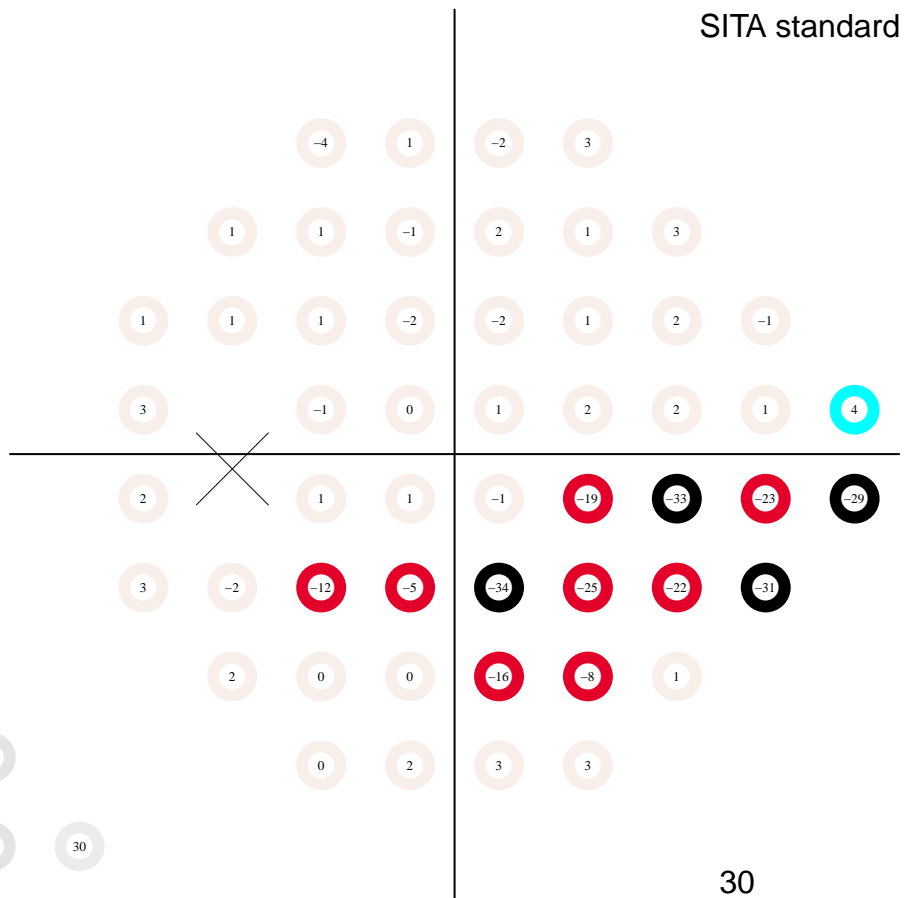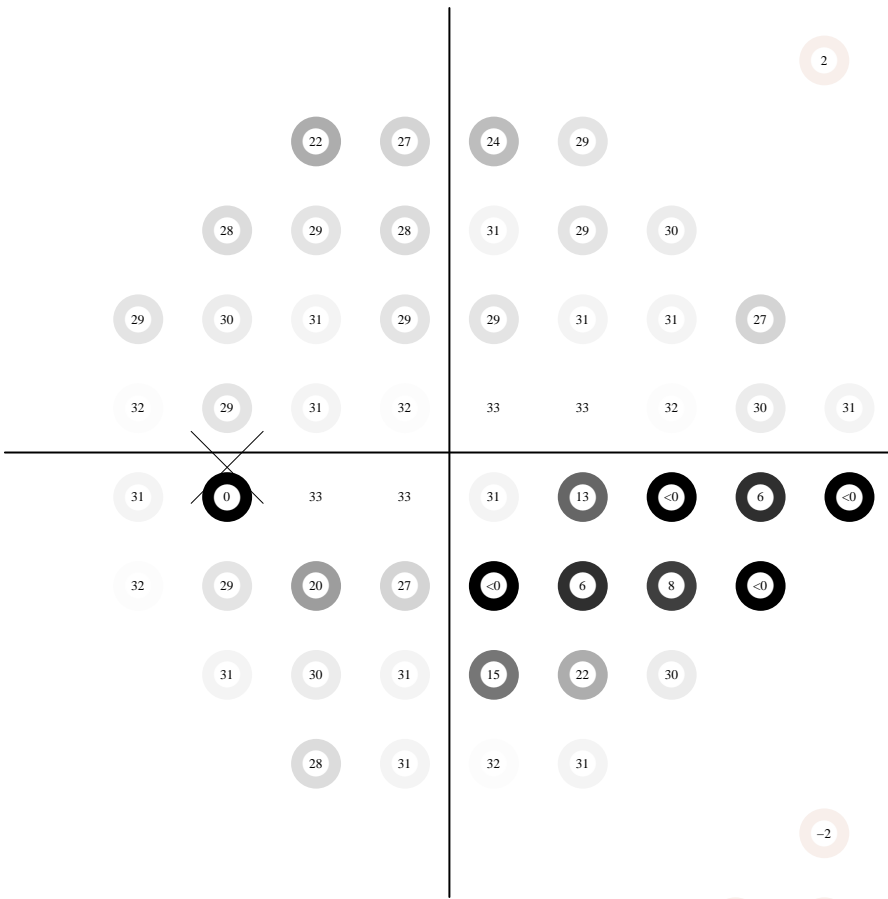

pattern deviation

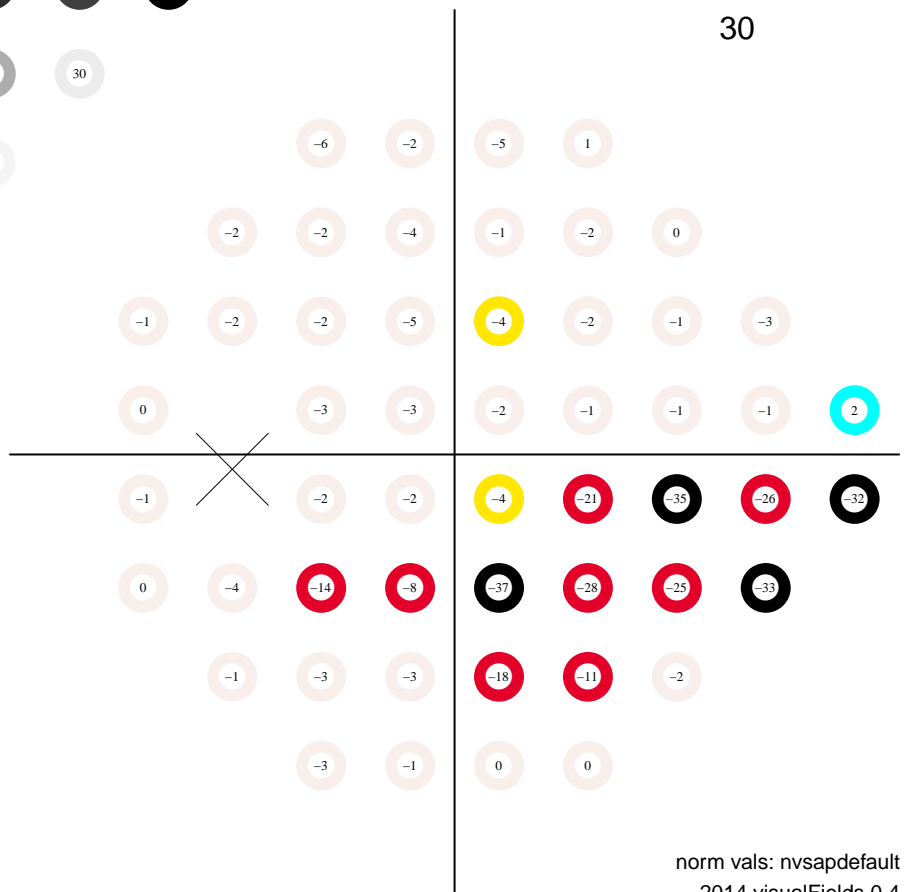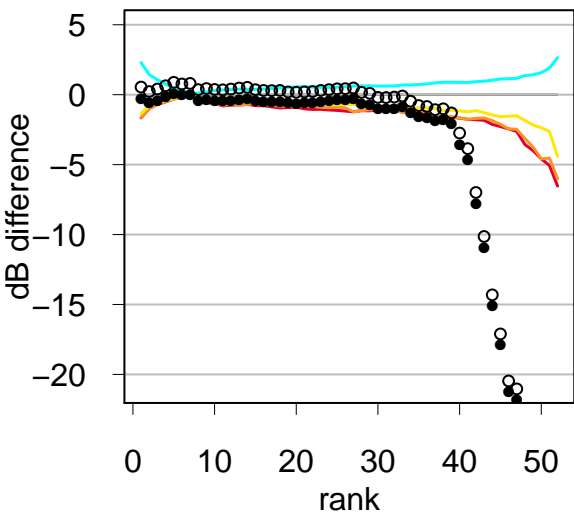

# Static Automated Perimetry. Single field analysis

Subject ID: 1034, age: 68, eye: OS (left)

Date: 12/10/2012 at 9:36:

Duration: 08:21, pause: 00:00

false positives 15.0 %

false negatives 0.0 %

fixation losses 5.9 %

MS 23.6 dB

MD -6.3 dB (p < 0.5 %)

PSD 11.4 dB (p < 0.5 %)

VFI 84.7 % (p < 0.5 %)

GH 1.1 dB

total deviation

Central 24-2  
SITA standard

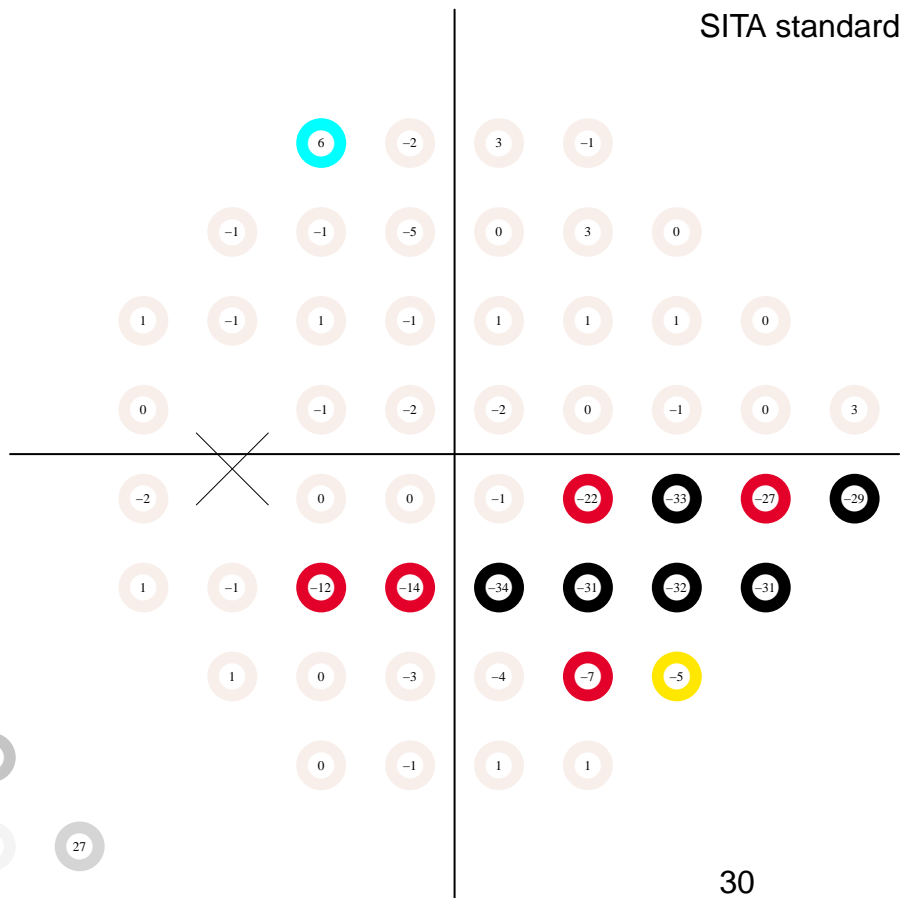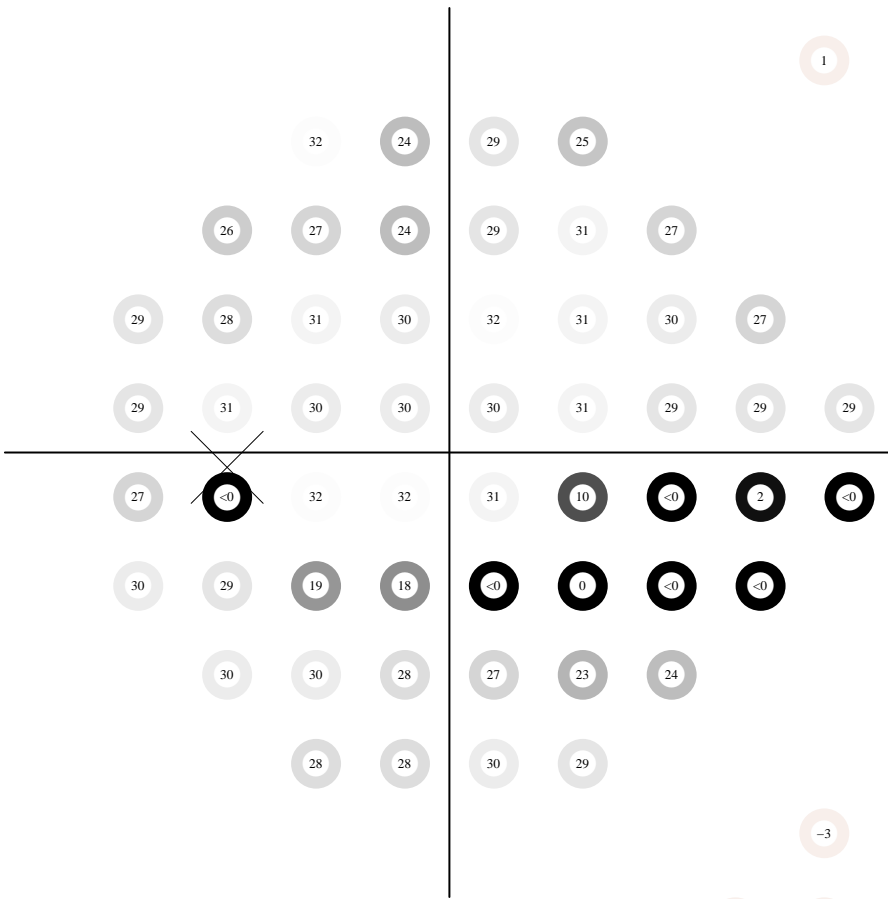

pattern deviation

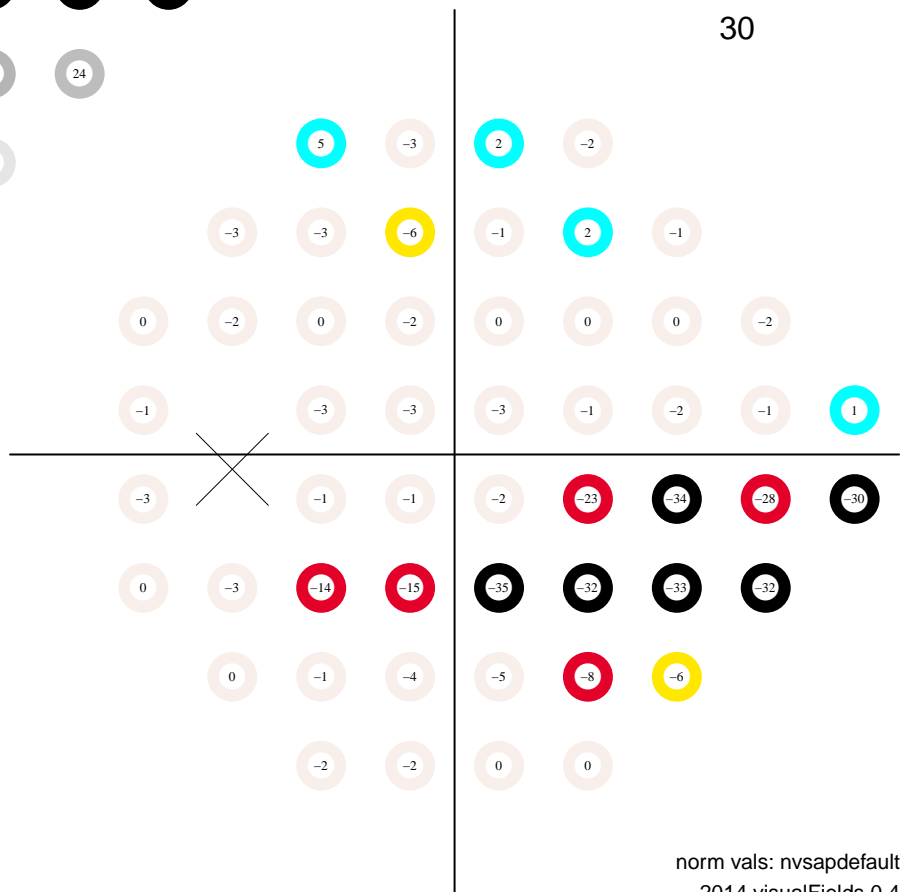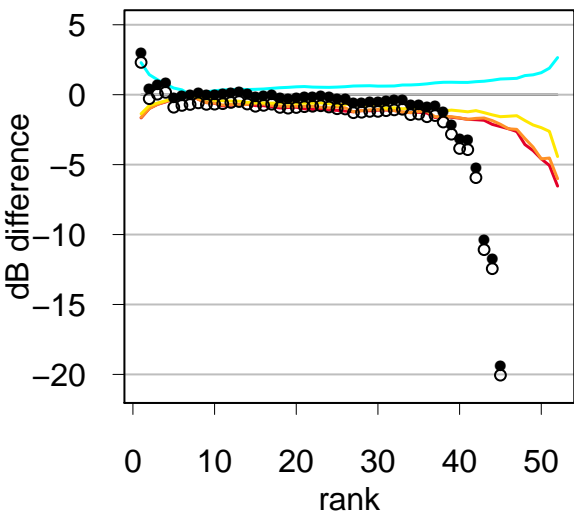

Supplement: i1552-5783-56-6-3496-s01.pdf [file i1552-5783-56-6-3496-s01.pdf]
